# Supplementary material for: Single-cell analysis of the ventricular-subventricular zone reveals signatures of dorsal and ventral adult neurogenesis
Source: eLife. 2021 Jul 14;10:e67436. doi: 10.7554/eLife.67436 (PMC8443251; doi:10.7554/eLife.67436)
Supplement: Figure 3—figure supplement 3—source data 1. [file elife-67436-fig3-figsupp3-data1.xlsx]

## Sheet: DorsalMarkerNet_nodes
name	LogFold	Marker	Top10
Gm26952		FALSE	FALSE
Slc23a4		FALSE	FALSE
Cyth4		FALSE	FALSE
Gm44850		FALSE	FALSE
Ucp1		FALSE	FALSE
A330035P11Rik		FALSE	FALSE
4931419H13Rik		FALSE	FALSE
Homer1		FALSE	FALSE
Sclt1	-0.238722	TRUE	FALSE
Ctnnd2		FALSE	FALSE
Mtnr1b		FALSE	FALSE
Itln1		FALSE	FALSE
C630028M04Rik		FALSE	FALSE
Gm43049		FALSE	FALSE
Akirin1-ps		FALSE	FALSE
Cyr61		FALSE	FALSE
Nlgn1		FALSE	FALSE
Gm10226		FALSE	FALSE
Egr1	-0.142283	TRUE	FALSE
Ldlrap1		FALSE	FALSE
Auts2		FALSE	FALSE
Ubald1		FALSE	FALSE
Gm28778		FALSE	FALSE
Il21		FALSE	FALSE
Vwa7		FALSE	FALSE
Ly6k		FALSE	FALSE
Usp36	-0.239982	TRUE	FALSE
Gm11814		FALSE	FALSE
Id1		FALSE	FALSE
Gm42461		FALSE	FALSE
Ythdc1		FALSE	FALSE
Cntnap2		FALSE	FALSE
Gm37074		FALSE	FALSE
Ptp4a1		FALSE	FALSE
Fth1	0.221747	TRUE	FALSE
Fos	-0.199041	TRUE	FALSE
Eif2c5		FALSE	FALSE
Lcmt2		FALSE	FALSE
Cstb	-0.47095	TRUE	FALSE
AU019990		FALSE	FALSE
Slc35e1		FALSE	FALSE
Gm44764		FALSE	FALSE
Mdga2	-0.248221	TRUE	FALSE
Gm13470		FALSE	FALSE
Mdk-ps1		FALSE	FALSE
Mpp7	-0.376785	TRUE	FALSE
Gm15210	-0.222813	TRUE	FALSE
Sult2a-ps4		FALSE	FALSE
Myadml2		FALSE	FALSE
Gm6828		FALSE	FALSE
Gm10327		FALSE	FALSE
Gm6249		FALSE	FALSE
Gm4846		FALSE	FALSE
Gm26603		FALSE	FALSE
Gm29088		FALSE	FALSE
Gm37477		FALSE	FALSE
Zfp711		FALSE	FALSE
Id3	0.113581	TRUE	FALSE
Nolc1		FALSE	FALSE
Malat1		FALSE	FALSE
Srxn1		FALSE	FALSE
Rora		FALSE	FALSE
Serpina3m		FALSE	FALSE
Mup6		FALSE	FALSE
Gm26545		FALSE	FALSE
Nkx2-4		FALSE	FALSE
Luzp2	-0.205277	TRUE	FALSE
Jmy	-0.291972	TRUE	FALSE
Tox	-0.238001	TRUE	FALSE
Gm43451		FALSE	FALSE
Lsamp		FALSE	FALSE
Pah		FALSE	FALSE
Rad21l		FALSE	FALSE
Meig1	0.190321	TRUE	FALSE
B830042I05Rik		FALSE	FALSE
Cox8c		FALSE	FALSE
Gm37853		FALSE	FALSE
Cwc25	-0.381516	TRUE	FALSE
Nrxn1	0.114296	TRUE	FALSE
Lin28a		FALSE	FALSE
Per1	-0.158439	TRUE	FALSE
Ccnl1	-0.361882	TRUE	FALSE
Gm12060		FALSE	FALSE
RP23-325K4.10		FALSE	FALSE
Lxn	0.557788	TRUE	FALSE
Gm45350		FALSE	FALSE
Hhatl	0.146711	TRUE	FALSE
Trpm3	-0.248296	TRUE	FALSE
Trmt61b	-0.653728	TRUE	FALSE
Nr4a1	-0.210579	TRUE	FALSE
Hps4	-0.270383	TRUE	FALSE
Pak1		FALSE	FALSE
Gm26760		FALSE	FALSE
Cebpb	-0.292631	TRUE	FALSE
Ndufa4l2		FALSE	FALSE
Btg2		FALSE	FALSE
Gm45465		FALSE	FALSE
Rlbp1	-0.542442	TRUE	TRUE
Gm5940		FALSE	FALSE
Agt	0.187348	TRUE	FALSE
Maff		FALSE	FALSE
RP23-416K18.1		FALSE	FALSE
Fndc3c1		FALSE	FALSE
Nr4a3	-0.404136	TRUE	FALSE
Opa3	-0.245897	TRUE	FALSE
Nkain2	-0.290579	TRUE	FALSE
Cadm2		FALSE	FALSE
Gm13578		FALSE	FALSE
Cfap73		FALSE	FALSE
Gm11764		FALSE	FALSE
Pard6a	-0.356184	TRUE	FALSE
Tmem198	-0.209785	TRUE	FALSE
Btbd9	-0.3943	TRUE	FALSE
Gm10634		FALSE	FALSE
Map1lc3a	-0.272464	TRUE	FALSE
Tbl3	-0.514097	TRUE	FALSE
Eras		FALSE	FALSE
Esrp1		FALSE	FALSE
Nr4a2	-0.61507	TRUE	FALSE
Rps19-ps11		FALSE	FALSE
Slc15a2	-0.683986	TRUE	TRUE
Isy1	-0.387597	TRUE	FALSE
Isl1		FALSE	FALSE
Cldn6		FALSE	FALSE
Urah	-1.27	TRUE	TRUE
Pde10a	-0.401216	TRUE	FALSE
Gm18698		FALSE	FALSE
Gm14107		FALSE	FALSE
Gm29260	-0.718747	TRUE	FALSE
Gltscr2	-0.50685	TRUE	FALSE
Dad1	-0.669186	TRUE	FALSE
Man1b1	-0.48315	TRUE	FALSE
Ptprz1	-0.298463	TRUE	FALSE
Gpc5	-0.835288	TRUE	FALSE
Coq10b	-0.428224	TRUE	FALSE
Mir99ahg		FALSE	FALSE
Snhg15	-0.666547	TRUE	FALSE
Gm21954	-0.135068	TRUE	FALSE
Dclk1	-0.635304	TRUE	TRUE
Emd	-0.787266	TRUE	FALSE
Fancd2os		FALSE	FALSE
Nrg1	-1.21756	TRUE	TRUE
Usp2	-0.384021	TRUE	FALSE
Braf	-0.485967	TRUE	FALSE
Arih1	-0.841083	TRUE	FALSE
Slc25a3	-0.586051	TRUE	FALSE
Vps37b	-1.07139	TRUE	TRUE
Gm10563	-0.298701	TRUE	FALSE
Cdk11b	-1.44939	TRUE	TRUE
Gm12108		FALSE	FALSE
Was		FALSE	FALSE
Adgrf3		FALSE	FALSE
Itgb2		FALSE	FALSE
Zap70		FALSE	FALSE
Epha5	-0.682048	TRUE	TRUE
Gm28595		FALSE	FALSE
Gm8317		FALSE	FALSE
Gm17225		FALSE	FALSE
Nr2f1	-0.167717	TRUE	FALSE
Six3	0.270365	TRUE	FALSE
Crym	2.03923	TRUE	FALSE
Gm11960		FALSE	FALSE
4930507D05Rik		FALSE	FALSE
Gm18562		FALSE	FALSE
Notum	0.582197	TRUE	FALSE
Vax2os		FALSE	FALSE
Gm13623		FALSE	FALSE
Cd300lb		FALSE	FALSE
Igfbp5	-0.336604	TRUE	FALSE
Ntrk2	-0.674504	TRUE	TRUE
Rbp2		FALSE	FALSE
Dsc3		FALSE	FALSE
Pla2g7	-1.2137	TRUE	TRUE
Gm11952		FALSE	FALSE
Gm2076		FALSE	FALSE
Gm45717		FALSE	FALSE
Tmem71		FALSE	FALSE
Gm5319		FALSE	FALSE
Gm13437		FALSE	FALSE
Pdcd1		FALSE	FALSE
Tmem173		FALSE	FALSE
Dmrta2		FALSE	FALSE
Gm13022		FALSE	FALSE
Tfap2c		FALSE	FALSE
Clu	-0.415725	TRUE	FALSE
Basp1	0.546825	TRUE	FALSE
4932431P20Rik		FALSE	FALSE
C1rb		FALSE	FALSE
Meg3	0.31473	TRUE	FALSE
Klhdc8a		FALSE	FALSE
Tex35		FALSE	FALSE
Gm3755		FALSE	FALSE
Csrp3		FALSE	FALSE
1700007F19Rik		FALSE	FALSE
Vwa5b1		FALSE	FALSE

## Sheet: DorsalMarkerNet_edges
interaction	name	weight
interacts with	Homer1 (interacts with) Vps37b	0.00458643
interacts with	Egr1 (interacts with) Vps37b	0.00469812
interacts with	Id1 (interacts with) Nrg1	0.00508755
interacts with	Fth1 (interacts with) Nrg1	0.00517079
interacts with	Fos (interacts with) Cdk11b	0.00521902
interacts with	Id3 (interacts with) Nrg1	0.00518103
interacts with	Luzp2 (interacts with) Nrg1	0.00454861
interacts with	Trpm3 (interacts with) Urah	0.00663167
interacts with	Nr4a1 (interacts with) Cdk11b	0.00459974
interacts with	Nr4a1 (interacts with) Vps37b	0.00622416
interacts with	Cebpb (interacts with) Vps37b	0.00571157
interacts with	Btg2 (interacts with) Vps37b	0.00604505
interacts with	Rlbp1 (interacts with) 4931419H13Rik	0.0045826
interacts with	Rlbp1 (interacts with) Ldlrap1	0.00485358
interacts with	Rlbp1 (interacts with) Gm37074	0.00514006
interacts with	Rlbp1 (interacts with) Gm44764	0.00532636
interacts with	Rlbp1 (interacts with) Rad21l	0.0060212
interacts with	Rlbp1 (interacts with) Lin28a	0.00629246
interacts with	Rlbp1 (interacts with) RP23-325K4.10	0.0063905
interacts with	Rlbp1 (interacts with) Gm45465	0.00705444
interacts with	Maff (interacts with) Vps37b	0.00594291
interacts with	Nr4a3 (interacts with) Vps37b	0.00449114
interacts with	Nr4a3 (interacts with) Cdk11b	0.00466907
interacts with	Nr4a3 (interacts with) Dclk1	0.0057666
interacts with	Opa3 (interacts with) Vps37b	0.005298
interacts with	Nkain2 (interacts with) Nrg1	0.0062441
interacts with	Cadm2 (interacts with) Nrg1	0.00681299
interacts with	Btbd9 (interacts with) Vps37b	0.00683286
interacts with	Map1lc3a (interacts with) Vps37b	0.00503181
interacts with	Tbl3 (interacts with) Cdk11b	0.00477803
interacts with	Tbl3 (interacts with) Vps37b	0.00498401
interacts with	Nr4a2 (interacts with) Vps37b	0.00510253
interacts with	Nr4a2 (interacts with) Cdk11b	0.00558312
interacts with	Slc15a2 (interacts with) Cyth4	0.00453705
interacts with	Slc15a2 (interacts with) Gm43049	0.00474947
interacts with	Slc15a2 (interacts with) Gm10226	0.00481376
interacts with	Slc15a2 (interacts with) Gm10327	0.00549339
interacts with	Slc15a2 (interacts with) Gm6249	0.00551437
interacts with	Slc15a2 (interacts with) Gm14107	0.00581283
interacts with	Slc15a2 (interacts with) Pah	0.00596046
interacts with	Slc15a2 (interacts with) Rps19-ps11	0.00856665
interacts with	Urah (interacts with) Gm26952	0.00451933
interacts with	Urah (interacts with) Mtnr1b	0.00465349
interacts with	Urah (interacts with) Itln1	0.00471183
interacts with	Urah (interacts with) Vwa7	0.00500541
interacts with	Urah (interacts with) Ly6k	0.00505633
interacts with	Urah (interacts with) Trpm3	0.0054164
interacts with	Urah (interacts with) Sult2a-ps4	0.00545333
interacts with	Urah (interacts with) Myadml2	0.00545382
interacts with	Urah (interacts with) Gm26760	0.00684571
interacts with	Urah (interacts with) Gm13578	0.00771072
interacts with	Urah (interacts with) Gm11764	0.00778587
interacts with	Urah (interacts with) Cldn6	0.00929759
interacts with	Pde10a (interacts with) Dclk1	0.00544229
interacts with	Pde10a (interacts with) Cdk11b	0.00658084
interacts with	Pde10a (interacts with) Vps37b	0.00937887
interacts with	Gm29260 (interacts with) Nrg1	0.00650726
interacts with	Gltscr2 (interacts with) Cdk11b	0.00649657
interacts with	Gltscr2 (interacts with) Vps37b	0.00928447
interacts with	Dad1 (interacts with) Vps37b	0.00861505
interacts with	Dad1 (interacts with) Cdk11b	0.00916873
interacts with	Man1b1 (interacts with) Cdk11b	0.00578569
interacts with	Ptprz1 (interacts with) Nrg1	0.00628078
interacts with	Gpc5 (interacts with) Rlbp1	0.00466808
interacts with	Gpc5 (interacts with) Nrg1	0.00947846
interacts with	Coq10b (interacts with) Dclk1	0.00721231
interacts with	Coq10b (interacts with) Cdk11b	0.00881224
interacts with	Coq10b (interacts with) Vps37b	0.0104658
interacts with	Mir99ahg (interacts with) Nrg1	0.00729573
interacts with	Snhg15 (interacts with) Vps37b	0.00603876
interacts with	Snhg15 (interacts with) Cdk11b	0.0103523
interacts with	Gm21954 (interacts with) Dclk1	0.00536629
interacts with	Dclk1 (interacts with) Ucp1	0.00455644
interacts with	Dclk1 (interacts with) Btbd9	0.00466614
interacts with	Dclk1 (interacts with) Nr4a2	0.0049342
interacts with	Dclk1 (interacts with) Slc15a2	0.00496752
interacts with	Dclk1 (interacts with) Slc15a2	0.00496752
interacts with	Dclk1 (interacts with) Slc25a3	0.00504122
interacts with	Dclk1 (interacts with) Gm42461	0.00510768
interacts with	Dclk1 (interacts with) Eif2c5	0.00522246
interacts with	Dclk1 (interacts with) Mdk-ps1	0.00537807
interacts with	Dclk1 (interacts with) Braf	0.00556834
interacts with	Dclk1 (interacts with) Srxn1	0.00566148
interacts with	Dclk1 (interacts with) Serpina3m	0.00567443
interacts with	Dclk1 (interacts with) Gm43451	0.00585904
interacts with	Dclk1 (interacts with) Nr4a3	0.00605738
interacts with	Dclk1 (interacts with) Emd	0.00607279
interacts with	Dclk1 (interacts with) Arih1	0.00628043
interacts with	Dclk1 (interacts with) Pde10a	0.00640701
interacts with	Dclk1 (interacts with) Gm45350	0.00655858
interacts with	Dclk1 (interacts with) Vps37b	0.00668392
interacts with	Dclk1 (interacts with) Vps37b	0.00668392
interacts with	Dclk1 (interacts with) Coq10b	0.00687694
interacts with	Dclk1 (interacts with) Gm5940	0.007092
interacts with	Dclk1 (interacts with) RP23-416K18.1	0.00735049
interacts with	Dclk1 (interacts with) Isl1	0.00884544
interacts with	Dclk1 (interacts with) Gm21954	0.0115241
interacts with	Emd (interacts with) Dclk1	0.00500654
interacts with	Emd (interacts with) Cdk11b	0.00764023
interacts with	Emd (interacts with) Vps37b	0.0080167
interacts with	Nrg1 (interacts with) Slc23a4	0.00453393
interacts with	Nrg1 (interacts with) Gm44850	0.0045449
interacts with	Nrg1 (interacts with) Id1	0.00454529
interacts with	Nrg1 (interacts with) Rlbp1	0.00455067
interacts with	Nrg1 (interacts with) Rlbp1	0.00455067
interacts with	Nrg1 (interacts with) Ctnnd2	0.00465161
interacts with	Nrg1 (interacts with) Fth1	0.0047302
interacts with	Nrg1 (interacts with) Akirin1-ps	0.00477437
interacts with	Nrg1 (interacts with) Nlgn1	0.00480001
interacts with	Nrg1 (interacts with) Auts2	0.00485714
interacts with	Nrg1 (interacts with) Trpm3	0.00492429
interacts with	Nrg1 (interacts with) Cntnap2	0.00512133
interacts with	Nrg1 (interacts with) Mdga2	0.00536107
interacts with	Nrg1 (interacts with) Gm29088	0.00555683
interacts with	Nrg1 (interacts with) Id3	0.00557619
interacts with	Nrg1 (interacts with) Malat1	0.00563703
interacts with	Nrg1 (interacts with) Rora	0.00566875
interacts with	Nrg1 (interacts with) Luzp2	0.00582171
interacts with	Nrg1 (interacts with) Tox	0.00585687
interacts with	Nrg1 (interacts with) Lsamp	0.00587306
interacts with	Nrg1 (interacts with) Meig1	0.00603411
interacts with	Nrg1 (interacts with) Cox8c	0.00606844
interacts with	Nrg1 (interacts with) Gm14107	0.00623759
interacts with	Nrg1 (interacts with) Nrxn1	0.00625655
interacts with	Nrg1 (interacts with) Lxn	0.00643083
interacts with	Nrg1 (interacts with) Hhatl	0.00658134
interacts with	Nrg1 (interacts with) Agt	0.00721249
interacts with	Nrg1 (interacts with) Nkain2	0.00764803
interacts with	Nrg1 (interacts with) Cadm2	0.00766739
interacts with	Nrg1 (interacts with) Gm10634	0.00801332
interacts with	Nrg1 (interacts with) Gm18698	0.00939981
interacts with	Nrg1 (interacts with) Gm29260	0.00958973
interacts with	Nrg1 (interacts with) Ptprz1	0.0104791
interacts with	Nrg1 (interacts with) Gpc5	0.0105847
interacts with	Nrg1 (interacts with) Mir99ahg	0.0109813
interacts with	Nrg1 (interacts with) Fancd2os	0.0123655
interacts with	Usp2 (interacts with) Dclk1	0.00489131
interacts with	Usp2 (interacts with) Cdk11b	0.00526822
interacts with	Usp2 (interacts with) Vps37b	0.0113834
interacts with	Braf (interacts with) Cdk11b	0.00533897
interacts with	Braf (interacts with) Vps37b	0.00856136
interacts with	Arih1 (interacts with) Slc15a2	0.0045937
interacts with	Arih1 (interacts with) Dclk1	0.0075318
interacts with	Arih1 (interacts with) Vps37b	0.0123003
interacts with	Arih1 (interacts with) Cdk11b	0.0138758
interacts with	Slc25a3 (interacts with) Slc15a2	0.00475916
interacts with	Slc25a3 (interacts with) Dclk1	0.00702003
interacts with	Slc25a3 (interacts with) Cdk11b	0.0134897
interacts with	Slc25a3 (interacts with) Vps37b	0.0154924
interacts with	Vps37b (interacts with) Slc15a2	0.00469468
interacts with	Vps37b (interacts with) Slc15a2	0.00469468
interacts with	Vps37b (interacts with) Gm10327	0.00474626
interacts with	Vps37b (interacts with) Egr1	0.00484971
interacts with	Vps37b (interacts with) Ubald1	0.00489074
interacts with	Vps37b (interacts with) Il21	0.00499176
interacts with	Vps37b (interacts with) Gm10563	0.005071
interacts with	Vps37b (interacts with) Cstb	0.00524786
interacts with	Vps37b (interacts with) Slc35e1	0.00530167
interacts with	Vps37b (interacts with) Gm13470	0.00536308
interacts with	Vps37b (interacts with) Mpp7	0.00537831
interacts with	Vps37b (interacts with) Gm15210	0.0054395
interacts with	Vps37b (interacts with) Gm26603	0.00553235
interacts with	Vps37b (interacts with) Zfp711	0.00556719
interacts with	Vps37b (interacts with) Gm26545	0.00575588
interacts with	Vps37b (interacts with) Jmy	0.00583366
interacts with	Vps37b (interacts with) Man1b1	0.00592454
interacts with	Vps37b (interacts with) Cwc25	0.00612224
interacts with	Vps37b (interacts with) Per1	0.00634492
interacts with	Vps37b (interacts with) Ccnl1	0.00635301
interacts with	Vps37b (interacts with) Gm12060	0.00638928
interacts with	Vps37b (interacts with) Trmt61b	0.00671086
interacts with	Vps37b (interacts with) Nr4a1	0.00675895
interacts with	Vps37b (interacts with) Pak1	0.00683464
interacts with	Vps37b (interacts with) Cebpb	0.00695984
interacts with	Vps37b (interacts with) Tbl3	0.00696212
interacts with	Vps37b (interacts with) Ndufa4l2	0.00698812
interacts with	Vps37b (interacts with) Btg2	0.00699998
interacts with	Vps37b (interacts with) Maff	0.00722366
interacts with	Vps37b (interacts with) Fndc3c1	0.00737089
interacts with	Vps37b (interacts with) Dclk1	0.00741696
interacts with	Vps37b (interacts with) Dclk1	0.00741696
interacts with	Vps37b (interacts with) Nr4a3	0.00743502
interacts with	Vps37b (interacts with) Opa3	0.00760735
interacts with	Vps37b (interacts with) Cfap73	0.00774318
interacts with	Vps37b (interacts with) Pard6a	0.00790095
interacts with	Vps37b (interacts with) Tmem198	0.00795071
interacts with	Vps37b (interacts with) Btbd9	0.00800623
interacts with	Vps37b (interacts with) Map1lc3a	0.00801985
interacts with	Vps37b (interacts with) Nr4a2	0.00844919
interacts with	Vps37b (interacts with) Dad1	0.00884171
interacts with	Vps37b (interacts with) Pde10a	0.00910095
interacts with	Vps37b (interacts with) Gm14107	0.00958033
interacts with	Vps37b (interacts with) Gltscr2	0.00970912
interacts with	Vps37b (interacts with) Snhg15	0.00978473
interacts with	Vps37b (interacts with) Coq10b	0.0109351
interacts with	Vps37b (interacts with) Emd	0.0117165
interacts with	Vps37b (interacts with) Usp2	0.0124227
interacts with	Vps37b (interacts with) Braf	0.0128382
interacts with	Vps37b (interacts with) Arih1	0.0143895
interacts with	Vps37b (interacts with) Slc25a3	0.0167998
interacts with	Vps37b (interacts with) Cdk11b	0.0179527
interacts with	Vps37b (interacts with) Cdk11b	0.0179527
interacts with	Gm10563 (interacts with) Cdk11b	0.0209787
interacts with	Cdk11b (interacts with) Dclk1	0.00451201
interacts with	Cdk11b (interacts with) Dclk1	0.00451201
interacts with	Cdk11b (interacts with) Jmy	0.0045128
interacts with	Cdk11b (interacts with) A330035P11Rik	0.00456343
interacts with	Cdk11b (interacts with) Btg2	0.00460986
interacts with	Cdk11b (interacts with) Sclt1	0.00462843
interacts with	Cdk11b (interacts with) C630028M04Rik	0.00473479
interacts with	Cdk11b (interacts with) Slc15a2	0.00475218
interacts with	Cdk11b (interacts with) Slc15a2	0.00475218
interacts with	Cdk11b (interacts with) Cyr61	0.004796
interacts with	Cdk11b (interacts with) Fos	0.00480058
interacts with	Cdk11b (interacts with) Ccnl1	0.00484717
interacts with	Cdk11b (interacts with) Mpp7	0.00492634
interacts with	Cdk11b (interacts with) Gm28778	0.00496795
interacts with	Cdk11b (interacts with) Usp36	0.0050571
interacts with	Cdk11b (interacts with) Gm11814	0.00508193
interacts with	Cdk11b (interacts with) Ythdc1	0.00511933
interacts with	Cdk11b (interacts with) Ptp4a1	0.00514883
interacts with	Cdk11b (interacts with) Lcmt2	0.00524637
interacts with	Cdk11b (interacts with) AU019990	0.00528304
interacts with	Cdk11b (interacts with) Trmt61b	0.00538184
interacts with	Cdk11b (interacts with) Gm6828	0.00548679
interacts with	Cdk11b (interacts with) Opa3	0.00549894
interacts with	Cdk11b (interacts with) Gm4846	0.00552615
interacts with	Cdk11b (interacts with) Gm37477	0.00556446
interacts with	Cdk11b (interacts with) Nolc1	0.005623
interacts with	Cdk11b (interacts with) Mup6	0.00571535
interacts with	Cdk11b (interacts with) Braf	0.00580055
interacts with	Cdk11b (interacts with) Nkx2-4	0.0058208
interacts with	Cdk11b (interacts with) Cwc25	0.00587752
interacts with	Cdk11b (interacts with) B830042I05Rik	0.00605346
interacts with	Cdk11b (interacts with) Gm37853	0.00608679
interacts with	Cdk11b (interacts with) Nr4a3	0.00622684
interacts with	Cdk11b (interacts with) Usp2	0.00649481
interacts with	Cdk11b (interacts with) Hps4	0.0067982
interacts with	Cdk11b (interacts with) Gltscr2	0.00703133
interacts with	Cdk11b (interacts with) Nr4a2	0.00708334
interacts with	Cdk11b (interacts with) Pde10a	0.00765045
interacts with	Cdk11b (interacts with) Tbl3	0.00804018
interacts with	Cdk11b (interacts with) Eras	0.00809915
interacts with	Cdk11b (interacts with) Esrp1	0.00823381
interacts with	Cdk11b (interacts with) Isy1	0.00881759
interacts with	Cdk11b (interacts with) Coq10b	0.00949104
interacts with	Cdk11b (interacts with) Emd	0.00965513
interacts with	Cdk11b (interacts with) Dad1	0.0100185
interacts with	Cdk11b (interacts with) Man1b1	0.0104423
interacts with	Cdk11b (interacts with) Snhg15	0.011191
interacts with	Cdk11b (interacts with) Vps37b	0.0128355
interacts with	Cdk11b (interacts with) Vps37b	0.0128355
interacts with	Cdk11b (interacts with) Slc25a3	0.0133669
interacts with	Cdk11b (interacts with) Arih1	0.0155913
interacts with	Cdk11b (interacts with) Gm10563	0.0365996
interacts with	Epha5 (interacts with) Gm11952	0.00449769
interacts with	Epha5 (interacts with) Gm5319	0.00454045
interacts with	Epha5 (interacts with) Tmem173	0.0045572
interacts with	Epha5 (interacts with) C1rb	0.00472549
interacts with	Epha5 (interacts with) Was	0.00485835
interacts with	Epha5 (interacts with) Adgrf3	0.00492092
interacts with	Epha5 (interacts with) Gm8317	0.00502812
interacts with	Epha5 (interacts with) Tmem71	0.00541854
interacts with	Epha5 (interacts with) Pdcd1	0.00548822
interacts with	Epha5 (interacts with) Itgb2	0.00589536
interacts with	Igfbp5 (interacts with) Pla2g7	0.00648221
interacts with	Ntrk2 (interacts with) Klhdc8a	0.00472843
interacts with	Ntrk2 (interacts with) Csrp3	0.00479779
interacts with	Ntrk2 (interacts with) Zap70	0.00494184
interacts with	Ntrk2 (interacts with) Gm11960	0.00508856
interacts with	Ntrk2 (interacts with) Gm18562	0.00514519
interacts with	Ntrk2 (interacts with) Gm45717	0.00538755
interacts with	Ntrk2 (interacts with) 4932431P20Rik	0.00557842
interacts with	Ntrk2 (interacts with) 1700007F19Rik	0.00576934
interacts with	Ntrk2 (interacts with) Vwa5b1	0.00580025
interacts with	Ntrk2 (interacts with) Gm28595	0.00597896
interacts with	Ntrk2 (interacts with) Gm17225	0.00603259
interacts with	Ntrk2 (interacts with) 4930507D05Rik	0.00615359
interacts with	Ntrk2 (interacts with) Gm13623	0.00641737
interacts with	Ntrk2 (interacts with) Gm2076	0.00685189
interacts with	Ntrk2 (interacts with) Gm13022	0.00734762
interacts with	Ntrk2 (interacts with) Tex35	0.00776475
interacts with	Ntrk2 (interacts with) Gm12108	0.00804032
interacts with	Ntrk2 (interacts with) Cd300lb	0.0121774
interacts with	Pla2g7 (interacts with) Dmrta2	0.004579
interacts with	Pla2g7 (interacts with) Tfap2c	0.00458561
interacts with	Pla2g7 (interacts with) Nr2f1	0.00506757
interacts with	Pla2g7 (interacts with) Six3	0.00506934
interacts with	Pla2g7 (interacts with) Notum	0.00516201
interacts with	Pla2g7 (interacts with) Rbp2	0.00534825
interacts with	Pla2g7 (interacts with) Meg3	0.00565044
interacts with	Pla2g7 (interacts with) Igfbp5	0.00577086
interacts with	Pla2g7 (interacts with) Crym	0.00612081
interacts with	Pla2g7 (interacts with) Vax2os	0.00640332
interacts with	Pla2g7 (interacts with) Gm13437	0.00701748
interacts with	Pla2g7 (interacts with) Gm3755	0.00778984
interacts with	Pla2g7 (interacts with) Dsc3	0.0144576
interacts with	Clu (interacts with) Pla2g7	0.00745547
interacts with	Basp1 (interacts with) Ntrk2	0.00467122
interacts with	Meg3 (interacts with) Pla2g7	0.00510574

## Sheet: VentralMarkerNet_nodes
name	LogFold	Marker	Top10
Gm15337		FALSE	FALSE
Ak7	0.107013	TRUE	FALSE
Gm4895		FALSE	FALSE
Ifitm3	0.521233	TRUE	FALSE
Malat1		FALSE	FALSE
Gm11353		FALSE	FALSE
Gm3203		FALSE	FALSE
Gm14928		FALSE	FALSE
5330439A09Rik		FALSE	FALSE
RP23-463P4.2		FALSE	FALSE
2010001K21Rik		FALSE	FALSE
Gm45021		FALSE	FALSE
Sorbs2os		FALSE	FALSE
Gm44507		FALSE	FALSE
Gm44398		FALSE	FALSE
Capsl	0.315908	TRUE	FALSE
Matn2		FALSE	FALSE
Tshb		FALSE	FALSE
Gm15584		FALSE	FALSE
Ssc4d		FALSE	FALSE
Ahnak2		FALSE	FALSE
Gm9115		FALSE	FALSE
Gm5596		FALSE	FALSE
Gm17916		FALSE	FALSE
Btg2		FALSE	FALSE
Sat1	0.229266	TRUE	FALSE
Gm28869		FALSE	FALSE
Zan		FALSE	FALSE
Ms4a14		FALSE	FALSE
RP24-79I19.6		FALSE	FALSE
Emc8		FALSE	FALSE
Cst6		FALSE	FALSE
Rnf212		FALSE	FALSE
Spag6		FALSE	FALSE
Kcna4		FALSE	FALSE
Angpt1		FALSE	FALSE
4921515E04Rik		FALSE	FALSE
Zic3		FALSE	FALSE
Lyzl1		FALSE	FALSE
Gm45381		FALSE	FALSE
Gm28610		FALSE	FALSE
Pla2g4a		FALSE	FALSE
Gm44453		FALSE	FALSE
Haus3		FALSE	FALSE
Cnr2		FALSE	FALSE
Gm28041		FALSE	FALSE
Nectin4		FALSE	FALSE
Plaa		FALSE	FALSE
Zfp715		FALSE	FALSE
Gm45443		FALSE	FALSE
Gm5083		FALSE	FALSE
mt-Cytb		FALSE	FALSE
Wnt5a		FALSE	FALSE
Pld1		FALSE	FALSE
Gm9025		FALSE	FALSE
Gm14762		FALSE	FALSE
Gm14308		FALSE	FALSE
Pik3r6		FALSE	FALSE
Hsd11b1		FALSE	FALSE
Tmem47	0.43202	TRUE	FALSE
1700034I23Rik		FALSE	FALSE
Rpl15-ps2		FALSE	FALSE
Gm45542		FALSE	FALSE
Gm16246		FALSE	FALSE
Gm26656		FALSE	FALSE
Vmn2r5		FALSE	FALSE
RP23-402F16.3		FALSE	FALSE
Ly86		FALSE	FALSE
Drd2		FALSE	FALSE
Gm37291		FALSE	FALSE
4931428L18Rik		FALSE	FALSE
Gm4756		FALSE	FALSE
Cfap126	0.236766	TRUE	FALSE
RP23-340G24.12		FALSE	FALSE
Cdh17		FALSE	FALSE
Sspo		FALSE	FALSE
Nnat	0.453474	TRUE	FALSE
Zbtb20	0.212748	TRUE	FALSE
Fgf10		FALSE	FALSE
1700082M22Rik		FALSE	FALSE
Gm12525		FALSE	FALSE
Pde4b	0.364769	TRUE	FALSE
Fndc5		FALSE	FALSE
Txn1		FALSE	FALSE
Akain1		FALSE	FALSE
F730043M19Rik		FALSE	FALSE
Ttc6		FALSE	FALSE
Fancd2		FALSE	FALSE
Clec4a3		FALSE	FALSE
Egr4		FALSE	FALSE
Fth1	0.221747	TRUE	FALSE
Gm15341		FALSE	FALSE
Irf1	0.30041	TRUE	FALSE
E330018M18Rik		FALSE	FALSE
Gm5916		FALSE	FALSE
Itm2b	0.253111	TRUE	FALSE
Nmu		FALSE	FALSE
Gm20219		FALSE	FALSE
Slc22a19		FALSE	FALSE
Adamts18	0.678156	TRUE	FALSE
4930461G14Rik		FALSE	FALSE
Bdkrb1		FALSE	FALSE
RP24-553E23.8		FALSE	FALSE
Adtrp		FALSE	FALSE
RP23-116E8.2		FALSE	FALSE
RP23-356G7.4		FALSE	FALSE
2310043M15Rik		FALSE	FALSE
1700016K19Rik	0.113157	TRUE	FALSE
Trank1		FALSE	FALSE
B4galnt2		FALSE	FALSE
Ppef2		FALSE	FALSE
Olfr418		FALSE	FALSE
Dynlrb2	0.143068	TRUE	FALSE
Serpinb1c		FALSE	FALSE
Tmem159	0.204101	TRUE	FALSE
Gm16433		FALSE	FALSE
Gm1833		FALSE	FALSE
Stat3	0.369426	TRUE	FALSE
1810010H24Rik		FALSE	FALSE
Slc1a2		FALSE	FALSE
Smpd5		FALSE	FALSE
Hsd17b13		FALSE	FALSE
Sfrp1	0.379733	TRUE	FALSE
2410004P03Rik	0.195597	TRUE	FALSE
Gm25334		FALSE	FALSE
Nmbr		FALSE	FALSE
Gm6522		FALSE	FALSE
Coch		FALSE	FALSE
Gm29543		FALSE	FALSE
Gm13015		FALSE	FALSE
Hsd11b2		FALSE	FALSE
Gm15263		FALSE	FALSE
Gm12695		FALSE	FALSE
Slc15a5		FALSE	FALSE
Mrc1		FALSE	FALSE
Gm15663		FALSE	FALSE
Gm6225		FALSE	FALSE
Vmn2r45		FALSE	FALSE
A430034D21Rik		FALSE	FALSE
Tmed6		FALSE	FALSE
Gm12454		FALSE	FALSE
Gm15461		FALSE	FALSE
Gm11465		FALSE	FALSE
Gm15414		FALSE	FALSE
Gm15590		FALSE	FALSE
Gm16617		FALSE	FALSE
Gm867		FALSE	FALSE
Gm45645		FALSE	FALSE
Arhgap24		FALSE	FALSE
Cdh8		FALSE	FALSE
Trim6		FALSE	FALSE
RP23-12L5.3		FALSE	FALSE
Gm44868		FALSE	FALSE
Gm25360		FALSE	FALSE
Apob		FALSE	FALSE
Sparcl1	-0.514253	TRUE	FALSE
Arap3		FALSE	FALSE
Mzt2		FALSE	FALSE
Maff		FALSE	FALSE
RP24-406I15.5		FALSE	FALSE
Cenpk		FALSE	FALSE
Tmem95		FALSE	FALSE
Gm45486		FALSE	FALSE
Tnk1		FALSE	FALSE
Gm26871	0.175927	TRUE	FALSE
Gm15860		FALSE	FALSE
Etv3		FALSE	FALSE
Gckr		FALSE	FALSE
Gm15880		FALSE	FALSE
Gm44636		FALSE	FALSE
Slc7a15		FALSE	FALSE
2610524H06Rik		FALSE	FALSE
Gm14168		FALSE	FALSE
Gm5570		FALSE	FALSE
Ankmy1		FALSE	FALSE
Zfp820		FALSE	FALSE
Phf24		FALSE	FALSE
Gm7308		FALSE	FALSE
Gm17021		FALSE	FALSE
Aqp12		FALSE	FALSE
Gm45552		FALSE	FALSE
Mt3		FALSE	FALSE
RP23-282P18.1		FALSE	FALSE
Tnfrsf1b		FALSE	FALSE
Gm13626		FALSE	FALSE
Socs3	0.391191	TRUE	FALSE
Gm43909		FALSE	FALSE
Astl		FALSE	FALSE
Gm26039		FALSE	FALSE
Fam183b	0.348205	TRUE	FALSE
Gm12145		FALSE	FALSE
Gm12602		FALSE	FALSE
Aldh3b3		FALSE	FALSE
Gm13412		FALSE	FALSE
Gm11201		FALSE	FALSE
Gm21986		FALSE	FALSE
Nxph2		FALSE	FALSE
Gm7281		FALSE	FALSE
Hcls1		FALSE	FALSE
Gm9286		FALSE	FALSE
Gpr149		FALSE	FALSE
Gm44851		FALSE	FALSE
Pifo	0.238787	TRUE	FALSE
Rps19-ps4		FALSE	FALSE
Adamts8		FALSE	FALSE
Slco5a1		FALSE	FALSE
Serpinb6c		FALSE	FALSE
Osmr		FALSE	FALSE
Trim38		FALSE	FALSE
Tbx6		FALSE	FALSE
Adap2os		FALSE	FALSE
Zfp36	0.280998	TRUE	FALSE
Des		FALSE	FALSE
Csf3		FALSE	FALSE
Bhlhe40		FALSE	FALSE
Gm19684		FALSE	FALSE
Tspan2os		FALSE	FALSE
Gm19744		FALSE	FALSE
Gm15198		FALSE	FALSE
Gm6743		FALSE	FALSE
Etv6	0.297259	TRUE	FALSE
Pidd1		FALSE	FALSE
Slc26a3		FALSE	FALSE
Abca4		FALSE	FALSE
Gm2087		FALSE	FALSE
Anxa8		FALSE	FALSE
Anxa13		FALSE	FALSE
Gm14764		FALSE	FALSE
Slc39a4		FALSE	FALSE
Krt28		FALSE	FALSE
Junb		FALSE	FALSE
Gm43825		FALSE	FALSE
Psmb6-ps2		FALSE	FALSE
Gm45140		FALSE	FALSE
Cebpb	-0.292631	TRUE	FALSE
Gm35013		FALSE	FALSE
Gm16071		FALSE	FALSE
A430048G15Rik		FALSE	FALSE
Gm3848		FALSE	FALSE
Eya1		FALSE	FALSE
Gm11832		FALSE	FALSE
Dgkeos		FALSE	FALSE
Pter	0.490838	TRUE	FALSE
C1ql3	0.531333	TRUE	TRUE
Psap	0.1667	TRUE	FALSE
Gm43415		FALSE	FALSE
Gm43122		FALSE	FALSE
Txndc2		FALSE	FALSE
Gm13617		FALSE	FALSE
Cxcr2		FALSE	FALSE
Adgrl3	0.83574	TRUE	TRUE
Gm4875		FALSE	FALSE
Ptn		FALSE	FALSE
Gpr55		FALSE	FALSE
Gm20755		FALSE	FALSE
Cfhr2		FALSE	FALSE
Lmo1	0.369653	TRUE	FALSE
Crym	2.03923	TRUE	TRUE
Gm29328		FALSE	FALSE
Tmem63c		FALSE	FALSE
Ms4a4a		FALSE	FALSE
Slc24a1		FALSE	FALSE
Sbno2	0.209315	TRUE	FALSE
Gm10293		FALSE	FALSE
Bmpr1b	0.368503	TRUE	FALSE
Gm30414		FALSE	FALSE
Zfp599		FALSE	FALSE
Frmd4a	0.805547	TRUE	TRUE
Adra1b		FALSE	FALSE
Acmsd		FALSE	FALSE
Grm3	0.726026	TRUE	TRUE
Gm26544		FALSE	FALSE
Cebpd	1.00151	TRUE	TRUE
Gm5808		FALSE	FALSE
Tnni3k		FALSE	FALSE
Ncam2	0.962419	TRUE	TRUE
Gm37184		FALSE	FALSE
Riiad1	0.684076	TRUE	TRUE
Gm16217		FALSE	FALSE
Gm42624		FALSE	FALSE
Itm2c	0.654125	TRUE	TRUE
RP23-99K2.5		FALSE	FALSE
Cpxcr1		FALSE	FALSE
Dpyd	0.85876	TRUE	TRUE

## Sheet: VentralMarkerNet_edges
interaction	name	weight
interacts with	Malat1 (interacts with) Grm3	0.00359578
interacts with	Btg2 (interacts with) Cebpd	0.00368739
interacts with	mt-Cytb (interacts with) Itm2c	0.00386859
interacts with	Cfap126 (interacts with) Riiad1	0.00398625
interacts with	Zbtb20 (interacts with) Frmd4a	0.00402178
interacts with	Fth1 (interacts with) Riiad1	0.00413892
interacts with	Itm2b (interacts with) Crym	0.00363604
interacts with	Adamts18 (interacts with) C1ql3	0.00420101
interacts with	Stat3 (interacts with) Dpyd	0.0045246
interacts with	Slc1a2 (interacts with) Grm3	0.0045592
interacts with	Sfrp1 (interacts with) Crym	0.00461203
interacts with	Sparcl1 (interacts with) C1ql3	0.00489194
interacts with	Maff (interacts with) Cebpd	0.00475689
interacts with	Mt3 (interacts with) Itm2c	0.00363364
interacts with	Mt3 (interacts with) Riiad1	0.00543234
interacts with	Zfp36 (interacts with) Cebpd	0.00609469
interacts with	Etv6 (interacts with) Cebpd	0.00389395
interacts with	Junb (interacts with) Cebpd	0.00682855
interacts with	Cebpb (interacts with) Cebpd	0.00668416
interacts with	Pter (interacts with) C1ql3	0.00591084
interacts with	C1ql3 (interacts with) Crym	0.00369073
interacts with	C1ql3 (interacts with) Crym	0.00369073
interacts with	C1ql3 (interacts with) Cnr2	0.00384197
interacts with	C1ql3 (interacts with) Fndc5	0.00404764
interacts with	C1ql3 (interacts with) Fancd2	0.00411257
interacts with	C1ql3 (interacts with) Gm5916	0.00416802
interacts with	C1ql3 (interacts with) Gm20219	0.00418844
interacts with	C1ql3 (interacts with) Gm15663	0.00470665
interacts with	C1ql3 (interacts with) Gm15414	0.004756
interacts with	C1ql3 (interacts with) Cdh8	0.00477905
interacts with	C1ql3 (interacts with) Trim6	0.00480001
interacts with	C1ql3 (interacts with) Sparcl1	0.0048381
interacts with	C1ql3 (interacts with) Gm5570	0.00519246
interacts with	C1ql3 (interacts with) Gm26039	0.00560383
interacts with	C1ql3 (interacts with) Aldh3b3	0.0056703
interacts with	C1ql3 (interacts with) Gm13412	0.00567487
interacts with	C1ql3 (interacts with) Pter	0.00737371
interacts with	Psap (interacts with) Itm2c	0.00407553
interacts with	Adgrl3 (interacts with) Gm14928	0.00360052
interacts with	Adgrl3 (interacts with) Gm9115	0.00368406
interacts with	Adgrl3 (interacts with) Ms4a14	0.00371033
interacts with	Adgrl3 (interacts with) Rnf212	0.00375456
interacts with	Adgrl3 (interacts with) Spag6	0.00377843
interacts with	Adgrl3 (interacts with) Gm44453	0.00383003
interacts with	Adgrl3 (interacts with) Pld1	0.00387176
interacts with	Adgrl3 (interacts with) Gm14308	0.00388408
interacts with	Adgrl3 (interacts with) Gm12525	0.00404485
interacts with	Adgrl3 (interacts with) Ttc6	0.00411021
interacts with	Adgrl3 (interacts with) Adtrp	0.00429967
interacts with	Adgrl3 (interacts with) A430034D21Rik	0.00472995
interacts with	Adgrl3 (interacts with) Tmed6	0.00474319
interacts with	Adgrl3 (interacts with) Arhgap24	0.00477677
interacts with	Adgrl3 (interacts with) RP23-12L5.3	0.00482579
interacts with	Adgrl3 (interacts with) Gckr	0.00508144
interacts with	Adgrl3 (interacts with) Gm13626	0.00547231
interacts with	Adgrl3 (interacts with) Gm12145	0.0056281
interacts with	Adgrl3 (interacts with) Csf3	0.00624017
interacts with	Adgrl3 (interacts with) Tspan2os	0.00640342
interacts with	Adgrl3 (interacts with) Txndc2	0.00789959
interacts with	Adgrl3 (interacts with) Cxcr2	0.00823028
interacts with	Ptn (interacts with) Grm3	0.0040869
interacts with	Ptn (interacts with) Crym	0.00712479
interacts with	Lmo1 (interacts with) Crym	0.00488393
interacts with	Crym (interacts with) Gm11353	0.00359671
interacts with	Crym (interacts with) Sorbs2os	0.00362412
interacts with	Crym (interacts with) Gm44507	0.00363293
interacts with	Crym (interacts with) C1ql3	0.00364763
interacts with	Crym (interacts with) C1ql3	0.00364763
interacts with	Crym (interacts with) Kcna4	0.00378023
interacts with	Crym (interacts with) Zic3	0.00379179
interacts with	Crym (interacts with) Nectin4	0.00384803
interacts with	Crym (interacts with) Pter	0.00401476
interacts with	Crym (interacts with) 1700082M22Rik	0.00403792
interacts with	Crym (interacts with) Akain1	0.00409848
interacts with	Crym (interacts with) Itm2b	0.00417239
interacts with	Crym (interacts with) RP24-553E23.8	0.00427143
interacts with	Crym (interacts with) Sfrp1	0.0044376
interacts with	Crym (interacts with) Tmem159	0.00446084
interacts with	Crym (interacts with) 1810010H24Rik	0.00452748
interacts with	Crym (interacts with) Gm13015	0.00465662
interacts with	Crym (interacts with) Hsd11b2	0.0046623
interacts with	Crym (interacts with) Slc15a5	0.00467157
interacts with	Crym (interacts with) Gm44868	0.00483378
interacts with	Crym (interacts with) Gm25360	0.00484571
interacts with	Crym (interacts with) Tmem95	0.00498123
interacts with	Crym (interacts with) Gm44636	0.00510238
interacts with	Crym (interacts with) Phf24	0.00525404
interacts with	Crym (interacts with) Gm45552	0.0054031
interacts with	Crym (interacts with) Gm12602	0.00564048
interacts with	Crym (interacts with) Gm21986	0.00570175
interacts with	Crym (interacts with) Gm44851	0.0057923
interacts with	Crym (interacts with) Adamts8	0.00583948
interacts with	Crym (interacts with) Slco5a1	0.00595078
interacts with	Crym (interacts with) Tbx6	0.00607106
interacts with	Crym (interacts with) Gm19684	0.00639377
interacts with	Crym (interacts with) Gm19744	0.00641485
interacts with	Crym (interacts with) Slc26a3	0.00657775
interacts with	Crym (interacts with) Gm35013	0.00693836
interacts with	Crym (interacts with) Dgkeos	0.00736227
interacts with	Crym (interacts with) Ptn	0.00864373
interacts with	Crym (interacts with) Gpr55	0.00890834
interacts with	Crym (interacts with) Lmo1	0.00927815
interacts with	Bmpr1b (interacts with) Cebpd	0.00757289
interacts with	Frmd4a (interacts with) Tshb	0.00367209
interacts with	Frmd4a (interacts with) Ssc4d	0.00367461
interacts with	Frmd4a (interacts with) Gm45381	0.00379532
interacts with	Frmd4a (interacts with) Gm28610	0.00380536
interacts with	Frmd4a (interacts with) Crym	0.00383156
interacts with	Frmd4a (interacts with) Crym	0.00383156
interacts with	Frmd4a (interacts with) Gm44851	0.00389322
interacts with	Frmd4a (interacts with) RP23-402F16.3	0.00392984
interacts with	Frmd4a (interacts with) Gm12454	0.00474566
interacts with	Frmd4a (interacts with) Anxa8	0.00665943
interacts with	Frmd4a (interacts with) Zfp599	0.0129631
interacts with	Grm3 (interacts with) 5330439A09Rik	0.00361184
interacts with	Grm3 (interacts with) RP23-463P4.2	0.00361548
interacts with	Grm3 (interacts with) Angpt1	0.00378505
interacts with	Grm3 (interacts with) 4921515E04Rik	0.00378562
interacts with	Grm3 (interacts with) Lyzl1	0.00379388
interacts with	Grm3 (interacts with) Pik3r6	0.00388561
interacts with	Grm3 (interacts with) 1700034I23Rik	0.00389956
interacts with	Grm3 (interacts with) Vmn2r5	0.00390581
interacts with	Grm3 (interacts with) Ly86	0.00394065
interacts with	Grm3 (interacts with) Drd2	0.00394599
interacts with	Grm3 (interacts with) Fgf10	0.00403238
interacts with	Grm3 (interacts with) E330018M18Rik	0.0041635
interacts with	Grm3 (interacts with) Smpd5	0.00457731
interacts with	Grm3 (interacts with) Gm29543	0.00464641
interacts with	Grm3 (interacts with) Gm15880	0.00508548
interacts with	Grm3 (interacts with) Zfp820	0.00522782
interacts with	Grm3 (interacts with) Gm17021	0.00535033
interacts with	Grm3 (interacts with) Astl	0.00560174
interacts with	Grm3 (interacts with) Gm7281	0.00575163
interacts with	Grm3 (interacts with) Hcls1	0.0057688
interacts with	Grm3 (interacts with) Adap2os	0.00607371
interacts with	Grm3 (interacts with) Krt28	0.00680104
interacts with	Grm3 (interacts with) Eya1	0.00714639
interacts with	Grm3 (interacts with) Acmsd	0.0131033
interacts with	Cebpd (interacts with) Matn2	0.00366694
interacts with	Cebpd (interacts with) Gm17916	0.00368623
interacts with	Cebpd (interacts with) Sat1	0.0036892
interacts with	Cebpd (interacts with) Gm28869	0.00369073
interacts with	Cebpd (interacts with) Haus3	0.0038309
interacts with	Cebpd (interacts with) Gm13617	0.00383903
interacts with	Cebpd (interacts with) Zfp715	0.00385686
interacts with	Cebpd (interacts with) Gm9025	0.00387777
interacts with	Cebpd (interacts with) Rpl15-ps2	0.00390003
interacts with	Cebpd (interacts with) Pde4b	0.00404699
interacts with	Cebpd (interacts with) F730043M19Rik	0.00410179
interacts with	Cebpd (interacts with) Clec4a3	0.00413348
interacts with	Cebpd (interacts with) Irf1	0.00414356
interacts with	Cebpd (interacts with) Slc22a19	0.00419538
interacts with	Cebpd (interacts with) RP23-116E8.2	0.00430042
interacts with	Cebpd (interacts with) Ppef2	0.00434903
interacts with	Cebpd (interacts with) Gm1833	0.00452246
interacts with	Cebpd (interacts with) Mrc1	0.00467785
interacts with	Cebpd (interacts with) Gm6225	0.00470921
interacts with	Cebpd (interacts with) Gm45645	0.00477536
interacts with	Cebpd (interacts with) Arap3	0.00492575
interacts with	Cebpd (interacts with) Mzt2	0.0049361
interacts with	Cebpd (interacts with) Maff	0.00496416
interacts with	Cebpd (interacts with) Gm45486	0.00499544
interacts with	Cebpd (interacts with) Tnk1	0.00503096
interacts with	Cebpd (interacts with) Zfp36	0.00504563
interacts with	Cebpd (interacts with) Etv3	0.00505764
interacts with	Cebpd (interacts with) Slc7a15	0.00512537
interacts with	Cebpd (interacts with) Socs3	0.00548102
interacts with	Cebpd (interacts with) Gm11201	0.00567848
interacts with	Cebpd (interacts with) Nxph2	0.00572794
interacts with	Cebpd (interacts with) Gpr149	0.00577623
interacts with	Cebpd (interacts with) Rps19-ps4	0.00582503
interacts with	Cebpd (interacts with) Serpinb6c	0.0059724
interacts with	Cebpd (interacts with) Osmr	0.00597701
interacts with	Cebpd (interacts with) Trim38	0.00602059
interacts with	Cebpd (interacts with) Bhlhe40	0.00626628
interacts with	Cebpd (interacts with) Junb	0.00639191
interacts with	Cebpd (interacts with) Gm15198	0.0064164
interacts with	Cebpd (interacts with) Etv6	0.00652178
interacts with	Cebpd (interacts with) Slc39a4	0.00674414
interacts with	Cebpd (interacts with) Gm45140	0.00691257
interacts with	Cebpd (interacts with) Cebpb	0.00692312
interacts with	Cebpd (interacts with) Gm11832	0.00720701
interacts with	Cebpd (interacts with) Gm4875	0.00855066
interacts with	Cebpd (interacts with) Gm29328	0.00933142
interacts with	Cebpd (interacts with) Sbno2	0.00945342
interacts with	Cebpd (interacts with) Bmpr1b	0.0101718
interacts with	Cebpd (interacts with) Gm26544	0.013503
interacts with	Ncam2 (interacts with) Gm15337	0.00357672
interacts with	Ncam2 (interacts with) Gm4895	0.00359379
interacts with	Ncam2 (interacts with) Gm44398	0.00363769
interacts with	Ncam2 (interacts with) Gm15584	0.00367255
interacts with	Ncam2 (interacts with) Ahnak2	0.0036824
interacts with	Ncam2 (interacts with) Emc8	0.00374603
interacts with	Ncam2 (interacts with) Plaa	0.00385584
interacts with	Ncam2 (interacts with) Gm5083	0.00386855
interacts with	Ncam2 (interacts with) Gm45542	0.00390025
interacts with	Ncam2 (interacts with) Gm4756	0.00397851
interacts with	Ncam2 (interacts with) Gm15341	0.00414027
interacts with	Ncam2 (interacts with) RP23-356G7.4	0.00430467
interacts with	Ncam2 (interacts with) Serpinb1c	0.00445148
interacts with	Ncam2 (interacts with) Gm16433	0.00446258
interacts with	Ncam2 (interacts with) Coch	0.00464113
interacts with	Ncam2 (interacts with) Gm16617	0.0047672
interacts with	Ncam2 (interacts with) Pidd1	0.00655354
interacts with	Ncam2 (interacts with) Gm30414	0.0103262
interacts with	Ncam2 (interacts with) Tnni3k	0.0136713
interacts with	Riiad1 (interacts with) Ak7	0.0035896
interacts with	Riiad1 (interacts with) Ifitm3	0.00359544
interacts with	Riiad1 (interacts with) Capsl	0.00366254
interacts with	Riiad1 (interacts with) Gm5596	0.00368564
interacts with	Riiad1 (interacts with) RP24-79I19.6	0.00372068
interacts with	Riiad1 (interacts with) Cst6	0.00375231
interacts with	Riiad1 (interacts with) Wnt5a	0.00387072
interacts with	Riiad1 (interacts with) Gm14762	0.00387858
interacts with	Riiad1 (interacts with) Tmem47	0.00389829
interacts with	Riiad1 (interacts with) 4931428L18Rik	0.00394831
interacts with	Riiad1 (interacts with) RP23-340G24.12	0.00398745
interacts with	Riiad1 (interacts with) Sspo	0.00400435
interacts with	Riiad1 (interacts with) Txn1	0.00407439
interacts with	Riiad1 (interacts with) Egr4	0.00413354
interacts with	Riiad1 (interacts with) 1700016K19Rik	0.0043086
interacts with	Riiad1 (interacts with) Trank1	0.00431163
interacts with	Riiad1 (interacts with) Olfr418	0.00438642
interacts with	Riiad1 (interacts with) Dynlrb2	0.0044015
interacts with	Riiad1 (interacts with) 2410004P03Rik	0.00461457
interacts with	Riiad1 (interacts with) Gm12695	0.00466723
interacts with	Riiad1 (interacts with) Gm11465	0.0047511
interacts with	Riiad1 (interacts with) Gm867	0.00477379
interacts with	Riiad1 (interacts with) Gm15860	0.00504998
interacts with	Riiad1 (interacts with) 2610524H06Rik	0.00513629
interacts with	Riiad1 (interacts with) Ankmy1	0.00521471
interacts with	Riiad1 (interacts with) Aqp12	0.00536871
interacts with	Riiad1 (interacts with) Fam183b	0.00561223
interacts with	Riiad1 (interacts with) Pifo	0.00580106
interacts with	Riiad1 (interacts with) Abca4	0.00659384
interacts with	Riiad1 (interacts with) Gm43825	0.00686095
interacts with	Riiad1 (interacts with) Psmb6-ps2	0.00686904
interacts with	Riiad1 (interacts with) Gm16071	0.00694898
interacts with	Riiad1 (interacts with) A430048G15Rik	0.00695998
interacts with	Riiad1 (interacts with) Gm13617	0.00798771
interacts with	Riiad1 (interacts with) Gm20755	0.00918898
interacts with	Riiad1 (interacts with) Tmem63c	0.00933797
interacts with	Riiad1 (interacts with) Gm10293	0.0100606
interacts with	Riiad1 (interacts with) Gm37184	0.0140009
interacts with	Itm2c (interacts with) 2010001K21Rik	0.00361609
interacts with	Itm2c (interacts with) Gm45021	0.00361908
interacts with	Itm2c (interacts with) Fam183b	0.00368812
interacts with	Itm2c (interacts with) Zan	0.00369291
interacts with	Itm2c (interacts with) Pla2g4a	0.00382508
interacts with	Itm2c (interacts with) Cfap126	0.00384871
interacts with	Itm2c (interacts with) Gm45443	0.00386317
interacts with	Itm2c (interacts with) Hsd11b1	0.00388847
interacts with	Itm2c (interacts with) Nnat	0.00402003
interacts with	Itm2c (interacts with) 4930461G14Rik	0.00422971
interacts with	Itm2c (interacts with) B4galnt2	0.0043297
interacts with	Itm2c (interacts with) Hsd17b13	0.00459852
interacts with	Itm2c (interacts with) Gm25334	0.00461883
interacts with	Itm2c (interacts with) Nmbr	0.00462121
interacts with	Itm2c (interacts with) Gm15263	0.00466382
interacts with	Itm2c (interacts with) Vmn2r45	0.00472453
interacts with	Itm2c (interacts with) Gm15461	0.00474822
interacts with	Itm2c (interacts with) Des	0.00616162
interacts with	Itm2c (interacts with) Anxa13	0.00673231
interacts with	Itm2c (interacts with) Gm3848	0.00699889
interacts with	Itm2c (interacts with) Psap	0.00772343
interacts with	Itm2c (interacts with) Gm43415	0.00780252
interacts with	Itm2c (interacts with) Slc24a1	0.00942542
interacts with	Itm2c (interacts with) Gm5808	0.0136061
interacts with	Itm2c (interacts with) Gm16217	0.0149975
interacts with	Itm2c (interacts with) Gm42624	0.0154955
interacts with	Dpyd (interacts with) Gm3203	0.0036003
interacts with	Dpyd (interacts with) Gm28041	0.00384478
interacts with	Dpyd (interacts with) Gm16246	0.00390094
interacts with	Dpyd (interacts with) Gm26656	0.00390449
interacts with	Dpyd (interacts with) Gm37291	0.00394757
interacts with	Dpyd (interacts with) Cdh17	0.00399376
interacts with	Dpyd (interacts with) Nmu	0.00417976
interacts with	Dpyd (interacts with) Bdkrb1	0.00423788
interacts with	Dpyd (interacts with) 2310043M15Rik	0.0043065
interacts with	Dpyd (interacts with) Gm6522	0.00462617
interacts with	Dpyd (interacts with) Gm15590	0.00476192
interacts with	Dpyd (interacts with) Apob	0.00488612
interacts with	Dpyd (interacts with) RP24-406I15.5	0.00496679
interacts with	Dpyd (interacts with) Cenpk	0.00496773
interacts with	Dpyd (interacts with) Gm26871	0.00503127
interacts with	Dpyd (interacts with) Gm14168	0.00518073
interacts with	Dpyd (interacts with) Gm7308	0.00525449
interacts with	Dpyd (interacts with) RP23-282P18.1	0.00544994
interacts with	Dpyd (interacts with) Tnfrsf1b	0.00545637
interacts with	Dpyd (interacts with) Gm43909	0.00548972
interacts with	Dpyd (interacts with) Gm9286	0.00577383
interacts with	Dpyd (interacts with) Gm6743	0.00642204
interacts with	Dpyd (interacts with) Gm2087	0.00665258
interacts with	Dpyd (interacts with) Gm14764	0.00674179
interacts with	Dpyd (interacts with) Gm43122	0.00789428
interacts with	Dpyd (interacts with) Cfhr2	0.00919003
interacts with	Dpyd (interacts with) Ms4a4a	0.00942057
interacts with	Dpyd (interacts with) Adra1b	0.0130441
interacts with	Dpyd (interacts with) RP23-99K2.5	0.0156299
interacts with	Dpyd (interacts with) Cpxcr1	0.0158922
