# Supplementary material for: Single-cell analysis of the ventricular-subventricular zone reveals signatures of dorsal and ventral adult neurogenesis
Source: eLife. 2021 Jul 14;10:e67436. doi: 10.7554/eLife.67436 (PMC8443251; doi:10.7554/eLife.67436)
Supplement: Figure 3—figure supplement 4—source data 1. [file elife-67436-fig3-figsupp4-data1.xlsx]

## Sheet: UrahNetwork_DorsalB_ nodes
name	LogFold	Marker
Fos	-0.199041	TRUE
Egr1	-0.142283	TRUE
Btg2	-0.121958	TRUE
Junb		FALSE
Ier2	-0.128102	TRUE
Jund	-0.190955	TRUE
Vps37b	-1.07139	TRUE
Cdk11b	-1.44939	TRUE
Aldoc	-0.106847	TRUE
Klri1		FALSE
Gm26641		FALSE
Slc25a3	-0.586051	TRUE
Homer1		FALSE
Fosb		FALSE
Jun		FALSE
Emd	-0.787266	TRUE
Dusp1	0.180434	TRUE
Arih1	-0.841083	TRUE
6330403K07Rik	-0.487602	TRUE
Prr29		FALSE
Coq10b	-0.428224	TRUE
Il17re		FALSE
Aqp4	0.397082	TRUE
Agt	0.187348	TRUE
Cebpd	1.00151	TRUE
Mzt2		FALSE
Ssbp3	-0.328354	TRUE
Apobec2		FALSE
Cfhr1		FALSE
Nr4a1	-0.210579	TRUE
Ablim2		FALSE
Braf	-0.485967	TRUE
Sync		FALSE
Snhg15	-0.666547	TRUE
Usp2	-0.384021	TRUE
Cst3	0.163583	TRUE
Nrg1	-1.21756	TRUE
Fancd2os		FALSE
Ntrk2	-0.674504	TRUE
Cd300lb		FALSE
Trpm3	-0.248296	TRUE
Gpc5	-0.835288	TRUE
Rn7sk		FALSE
Cpe		FALSE
Sbno2	0.209315	TRUE
Maff	-0.199776	TRUE
Cyp2c55		FALSE
Dclk1	-0.635304	TRUE
Gm21954	-0.135068	TRUE
Lax1		FALSE
1700030L20Rik		FALSE
Nr2f1	-0.167717	TRUE
Mir99ahg		FALSE
Gltscr2	-0.50685	TRUE
9630013K17Rik		FALSE
Dad1	-0.669186	TRUE
Prdx6		FALSE
Gm15854		FALSE
Tph1		FALSE
Prss43		FALSE
Ptprz1	-0.298463	TRUE
Actg1		FALSE
Cyr61		FALSE
Gm6213		FALSE
Pde10a	-0.401216	TRUE
Tuba1a	0.146355	TRUE
RP23-240G3.3		FALSE
Pantr1	0.324679	TRUE
RP23-193A14.5		FALSE
Rspo1		FALSE
Apoe		FALSE
Gm29260	-0.718747	TRUE
Gm14107		FALSE
Mt3		FALSE
Itm2b	0.253111	TRUE
Rarres1		FALSE
Gm18698		FALSE
Urah	-1.27	TRUE
Cldn6		FALSE
Ms4a8a		FALSE
Gm12749		FALSE
Mettl7a3		FALSE
Isl1		FALSE
Nr4a3	-0.404136	TRUE
Fermt1		FALSE
Rhob		FALSE
Pard6a	-0.356184	TRUE
Gm9947		FALSE
Clu	-0.415725	TRUE
Nr4a2	-0.61507	TRUE
Gm45042		FALSE
Zan		FALSE
Cntnap2	-0.410645	TRUE
Klf4	0.211434	TRUE
Enho	-0.198752	TRUE
Cldn20		FALSE
Kctd1	-0.153368	TRUE
Gm12257		FALSE
Gm29296		FALSE
Cebpb	-0.292631	TRUE
Gm5796		FALSE
Nkain2	-0.290579	TRUE
Gm12108		FALSE
Neb		FALSE
Map1lc3a	-0.272464	TRUE
4930426L09Rik		FALSE
Gm10634		FALSE
Btbd9	-0.3943	TRUE
Ddit3		FALSE
Tmem198	-0.209785	TRUE
Opa3	-0.245897	TRUE
Gm44059		FALSE
Tfap2c		FALSE
Mpp7	-0.376785	TRUE
Cldn10		FALSE
S100a1		FALSE
Gm11764		FALSE
Tex35		FALSE
L1cam		FALSE
Cfap73		FALSE
Hmgb1-ps2		FALSE
Ptn		FALSE
Tspan7	0.280844	TRUE
Gm13578		FALSE
Gm34768		FALSE
Gm28513		FALSE
Tmod4		FALSE
Cadm2		FALSE
Gfap	-0.58437	TRUE
Fas	0.671685	TRUE
Mt1	-0.233723	TRUE
1600014C23Rik		FALSE
Slc2a2		FALSE
St18		FALSE
Fndc3c1		FALSE
Slc25a18	0.158544	TRUE
RP23-416K18.1		FALSE
Gm13022		FALSE
Gm10563	-0.298701	TRUE
Gm11576		FALSE
Nrg3		FALSE
Gm8994		FALSE
Zfp36	0.280998	TRUE
Gm44117		FALSE
D430036J16Rik		FALSE
Gm5940		FALSE
Gm15810		FALSE
Gm45601		FALSE
Ndufa4l2		FALSE
Tbl3	-0.514097	TRUE
Olfr657		FALSE
Wfdc17		FALSE
Cd81		FALSE
Gm2076		FALSE
Gm26760		FALSE
Pak1	-0.201159	TRUE
Gm12463		FALSE
H2-Pb		FALSE
9430037O13Rik		FALSE
RP23-54G12.8		FALSE
Dlx5		FALSE
Rbp1	-0.193471	TRUE
Actb	0.152866	TRUE
Gm2447		FALSE
Trmt61b	-0.653728	TRUE
Sema3f		FALSE
Zfp981		FALSE
Gm37357		FALSE
Gm37748		FALSE
Hhatl	0.146711	TRUE
Gm45350		FALSE

## Sheet: UrahNetwork_DorsalB_edges
interaction	name	weight
interacts with	Fos (interacts with) Egr1	0.0268541
interacts with	Fos (interacts with) Btg2	0.0204558
interacts with	Fos (interacts with) Ier2	0.0187213
interacts with	Fos (interacts with) Junb	0.018286
interacts with	Fos (interacts with) Gm26641	0.0169186
interacts with	Fos (interacts with) Jund	0.0158431
interacts with	Fos (interacts with) Fosb	0.0154708
interacts with	Fos (interacts with) Jun	0.0152761
interacts with	Fos (interacts with) Dusp1	0.0144446
interacts with	Fos (interacts with) Il17re	0.0139934
interacts with	Fos (interacts with) Sync	0.0125116
interacts with	Fos (interacts with) Rn7sk	0.0120991
interacts with	Fos (interacts with) Homer1	0.010161
interacts with	Fos (interacts with) Cyr61	0.00932785
interacts with	Fos (interacts with) Fermt1	0.00875105
interacts with	Fos (interacts with) Rhob	0.00861517
interacts with	Fos (interacts with) Klf4	0.00812453
interacts with	Fos (interacts with) Actg1	0.00799518
interacts with	Fos (interacts with) 9630013K17Rik	0.00795869
interacts with	Fos (interacts with) Gm34768	0.00769386
interacts with	Fos (interacts with) Maff	0.00728565
interacts with	Fos (interacts with) Coq10b	0.00674211
interacts with	Egr1 (interacts with) Fos	0.02202
interacts with	Egr1 (interacts with) Btg2	0.0215023
interacts with	Egr1 (interacts with) Ier2	0.0182539
interacts with	Egr1 (interacts with) Junb	0.0144649
interacts with	Egr1 (interacts with) Homer1	0.0141123
interacts with	Egr1 (interacts with) Jund	0.0129978
interacts with	Egr1 (interacts with) Jun	0.0127073
interacts with	Egr1 (interacts with) Fosb	0.0123367
interacts with	Egr1 (interacts with) Rn7sk	0.00994773
interacts with	Egr1 (interacts with) Gm29296	0.00826953
interacts with	Egr1 (interacts with) Ddit3	0.00800105
interacts with	Egr1 (interacts with) Actg1	0.00797152
interacts with	Egr1 (interacts with) Klf4	0.00781315
interacts with	Egr1 (interacts with) Nr4a1	0.00781296
interacts with	Egr1 (interacts with) Zfp36	0.00724408
interacts with	Egr1 (interacts with) Coq10b	0.00724047
interacts with	Egr1 (interacts with) Dusp1	0.00723743
interacts with	Egr1 (interacts with) Gm44117	0.00721317
interacts with	Egr1 (interacts with) Cyr61	0.00698663
interacts with	Egr1 (interacts with) Maff	0.00689248
interacts with	Egr1 (interacts with) Wfdc17	0.00689151
interacts with	Egr1 (interacts with) Usp2	0.00688734
interacts with	Egr1 (interacts with) Actb	0.00675971
interacts with	Egr1 (interacts with) Gm2447	0.00671782
interacts with	Btg2 (interacts with) Fos	0.0233854
interacts with	Btg2 (interacts with) Egr1	0.0213589
interacts with	Btg2 (interacts with) Junb	0.0165735
interacts with	Btg2 (interacts with) Homer1	0.0163842
interacts with	Btg2 (interacts with) Ier2	0.0153649
interacts with	Btg2 (interacts with) Jund	0.0149717
interacts with	Btg2 (interacts with) Fosb	0.012281
interacts with	Btg2 (interacts with) Coq10b	0.0118985
interacts with	Btg2 (interacts with) Maff	0.0117304
interacts with	Btg2 (interacts with) Actg1	0.0103466
interacts with	Btg2 (interacts with) Cyr61	0.0102432
interacts with	Btg2 (interacts with) Jun	0.00982776
interacts with	Btg2 (interacts with) Usp2	0.00929714
interacts with	Btg2 (interacts with) Slc25a3	0.00892599
interacts with	Btg2 (interacts with) Cntnap2	0.00841795
interacts with	Btg2 (interacts with) Kctd1	0.00831074
interacts with	Btg2 (interacts with) Cebpb	0.00825998
interacts with	Btg2 (interacts with) Rn7sk	0.00815811
interacts with	Btg2 (interacts with) Nr4a3	0.0079736
interacts with	Btg2 (interacts with) Nr4a1	0.0079042
interacts with	Btg2 (interacts with) Gm11576	0.00729935
interacts with	Btg2 (interacts with) D430036J16Rik	0.00712637
interacts with	Btg2 (interacts with) Zfp36	0.00712017
interacts with	Btg2 (interacts with) Ddit3	0.00683543
interacts with	Btg2 (interacts with) Zfp981	0.00664669
interacts with	Btg2 (interacts with) Gm37357	0.00662324
interacts with	Junb (interacts with) Fos	0.0199756
interacts with	Junb (interacts with) Btg2	0.0159601
interacts with	Junb (interacts with) Egr1	0.0156434
interacts with	Ier2 (interacts with) Egr1	0.0198514
interacts with	Ier2 (interacts with) Fos	0.0185564
interacts with	Ier2 (interacts with) Btg2	0.0142722
interacts with	Jund (interacts with) Fos	0.0189023
interacts with	Jund (interacts with) Egr1	0.0152587
interacts with	Jund (interacts with) Btg2	0.0140328
interacts with	Vps37b (interacts with) Cdk11b	0.0179527
interacts with	Vps37b (interacts with) Slc25a3	0.0167998
interacts with	Vps37b (interacts with) Arih1	0.0143895
interacts with	Vps37b (interacts with) Braf	0.0128382
interacts with	Vps37b (interacts with) Usp2	0.0124227
interacts with	Vps37b (interacts with) Emd	0.0117165
interacts with	Vps37b (interacts with) Coq10b	0.0109351
interacts with	Vps37b (interacts with) Snhg15	0.00978473
interacts with	Vps37b (interacts with) Gltscr2	0.00970912
interacts with	Vps37b (interacts with) Gm14107	0.00958033
interacts with	Vps37b (interacts with) Pde10a	0.00910095
interacts with	Vps37b (interacts with) Dad1	0.00884171
interacts with	Vps37b (interacts with) Nr4a2	0.00844919
interacts with	Vps37b (interacts with) Map1lc3a	0.00801985
interacts with	Vps37b (interacts with) Btbd9	0.00800623
interacts with	Vps37b (interacts with) Tmem198	0.00795071
interacts with	Vps37b (interacts with) Pard6a	0.00790095
interacts with	Vps37b (interacts with) Cfap73	0.00774318
interacts with	Vps37b (interacts with) Opa3	0.00760735
interacts with	Vps37b (interacts with) Nr4a3	0.00743502
interacts with	Vps37b (interacts with) Dclk1	0.00741696
interacts with	Vps37b (interacts with) Fndc3c1	0.00737089
interacts with	Vps37b (interacts with) Maff	0.00722366
interacts with	Vps37b (interacts with) Btg2	0.00699998
interacts with	Vps37b (interacts with) Ndufa4l2	0.00698812
interacts with	Vps37b (interacts with) Tbl3	0.00696212
interacts with	Vps37b (interacts with) Cebpb	0.00695984
interacts with	Vps37b (interacts with) Pak1	0.00683464
interacts with	Vps37b (interacts with) Nr4a1	0.00675895
interacts with	Vps37b (interacts with) Trmt61b	0.00671086
interacts with	Cdk11b (interacts with) Slc25a3	0.0133669
interacts with	Cdk11b (interacts with) Vps37b	0.0128355
interacts with	Aldoc (interacts with) Klri1	0.0171671
interacts with	Aldoc (interacts with) Cst3	0.0108991
interacts with	Aldoc (interacts with) Tph1	0.0106485
interacts with	Aldoc (interacts with) Gm6213	0.0101809
interacts with	Aldoc (interacts with) Gm12749	0.00896087
interacts with	Aldoc (interacts with) Gm37748	0.00660718
interacts with	Slc25a3 (interacts with) Vps37b	0.0154924
interacts with	Slc25a3 (interacts with) Emd	0.0146673
interacts with	Slc25a3 (interacts with) Coq10b	0.0140016
interacts with	Slc25a3 (interacts with) Cdk11b	0.0134897
interacts with	Slc25a3 (interacts with) Nr4a1	0.0131908
interacts with	Slc25a3 (interacts with) Snhg15	0.0124686
interacts with	Slc25a3 (interacts with) Arih1	0.0120362
interacts with	Slc25a3 (interacts with) Gltscr2	0.0107997
interacts with	Slc25a3 (interacts with) 9630013K17Rik	0.0107222
interacts with	Slc25a3 (interacts with) Dad1	0.0107088
interacts with	Slc25a3 (interacts with) Usp2	0.0104959
interacts with	Slc25a3 (interacts with) Pde10a	0.0099703
interacts with	Slc25a3 (interacts with) Mettl7a3	0.00888137
interacts with	Slc25a3 (interacts with) Nr4a3	0.00878206
interacts with	Slc25a3 (interacts with) Pard6a	0.0086055
interacts with	Slc25a3 (interacts with) Btg2	0.008531
interacts with	Slc25a3 (interacts with) Maff	0.00831977
interacts with	Slc25a3 (interacts with) Opa3	0.00794242
interacts with	Slc25a3 (interacts with) Mpp7	0.00781667
interacts with	Slc25a3 (interacts with) Btbd9	0.00778582
interacts with	Slc25a3 (interacts with) Braf	0.00755403
interacts with	Slc25a3 (interacts with) Gm10563	0.0073251
interacts with	Slc25a3 (interacts with) Dclk1	0.00702003
interacts with	Slc25a3 (interacts with) Cebpb	0.00678733
interacts with	Slc25a3 (interacts with) Gm14107	0.00661276
interacts with	Slc25a3 (interacts with) Nr4a2	0.00651156
interacts with	Homer1 (interacts with) Btg2	0.014613
interacts with	Homer1 (interacts with) Egr1	0.0122245
interacts with	Homer1 (interacts with) Fos	0.0101253
interacts with	Fosb (interacts with) Fos	0.0139224
interacts with	Fosb (interacts with) Egr1	0.0124695
interacts with	Fosb (interacts with) Btg2	0.00941705
interacts with	Jun (interacts with) Fos	0.0143516
interacts with	Jun (interacts with) Egr1	0.0127712
interacts with	Jun (interacts with) Btg2	0.00933143
interacts with	Emd (interacts with) Slc25a3	0.0112575
interacts with	Emd (interacts with) Vps37b	0.0080167
interacts with	Dusp1 (interacts with) Fos	0.0107387
interacts with	Arih1 (interacts with) Vps37b	0.0123003
interacts with	Arih1 (interacts with) Slc25a3	0.0100345
interacts with	Arih1 (interacts with) Dclk1	0.0075318
interacts with	6330403K07Rik (interacts with) Prr29	0.0140405
interacts with	6330403K07Rik (interacts with) Prdx6	0.00950123
interacts with	6330403K07Rik (interacts with) Enho	0.00837983
interacts with	6330403K07Rik (interacts with) Tfap2c	0.00784303
interacts with	6330403K07Rik (interacts with) Nrg3	0.00725535
interacts with	6330403K07Rik (interacts with) Gm45601	0.00700456
interacts with	Coq10b (interacts with) Slc25a3	0.0139804
interacts with	Coq10b (interacts with) Btg2	0.0104662
interacts with	Coq10b (interacts with) Vps37b	0.0104658
interacts with	Coq10b (interacts with) Dclk1	0.00721231
interacts with	Coq10b (interacts with) Fos	0.00709114
interacts with	Aqp4 (interacts with) Agt	0.0139294
interacts with	Aqp4 (interacts with) Ablim2	0.0128425
interacts with	Aqp4 (interacts with) Lax1	0.0112005
interacts with	Aqp4 (interacts with) 1700030L20Rik	0.0111845
interacts with	Aqp4 (interacts with) Prss43	0.0105925
interacts with	Aqp4 (interacts with) Rarres1	0.00945157
interacts with	Aqp4 (interacts with) Hmgb1-ps2	0.00773179
interacts with	Aqp4 (interacts with) Slc25a18	0.00735195
interacts with	Cebpd (interacts with) Mzt2	0.0137113
interacts with	Cebpd (interacts with) Sbno2	0.0117308
interacts with	Cebpd (interacts with) Fas	0.00762557
interacts with	Cebpd (interacts with) RP23-54G12.8	0.00679546
interacts with	Ssbp3 (interacts with) Apobec2	0.0135167
interacts with	Ssbp3 (interacts with) Cfhr1	0.0134523
interacts with	Ssbp3 (interacts with) Zan	0.00841939
interacts with	Nr4a1 (interacts with) Slc25a3	0.00882043
interacts with	Nr4a1 (interacts with) Btg2	0.007177
interacts with	Nr4a1 (interacts with) Egr1	0.00673045
interacts with	Braf (interacts with) Vps37b	0.00856136
interacts with	Braf (interacts with) Slc25a3	0.00653998
interacts with	Snhg15 (interacts with) Slc25a3	0.00727824
interacts with	Usp2 (interacts with) Vps37b	0.0113834
interacts with	Usp2 (interacts with) Btg2	0.00862075
interacts with	Usp2 (interacts with) Slc25a3	0.00789675
interacts with	Cst3 (interacts with) Aldoc	0.0124099
interacts with	Cst3 (interacts with) Cpe	0.0118003
interacts with	Cst3 (interacts with) Cyp2c55	0.0116543
interacts with	Cst3 (interacts with) Rspo1	0.00985745
interacts with	Cst3 (interacts with) Itm2b	0.00946492
interacts with	Cst3 (interacts with) Apoe	0.00883867
interacts with	Cst3 (interacts with) Gm9947	0.00859099
interacts with	Cst3 (interacts with) Gm45042	0.00842518
interacts with	Cst3 (interacts with) Cldn20	0.00834455
interacts with	Cst3 (interacts with) Neb	0.00803112
interacts with	Cst3 (interacts with) 4930426L09Rik	0.00801714
interacts with	Cst3 (interacts with) Clu	0.00800681
interacts with	Cst3 (interacts with) Cldn10	0.00780527
interacts with	Cst3 (interacts with) S100a1	0.00778689
interacts with	Cst3 (interacts with) 1600014C23Rik	0.00761066
interacts with	Cst3 (interacts with) Slc2a2	0.00745397
interacts with	Cst3 (interacts with) Gm15810	0.00706747
interacts with	Cst3 (interacts with) Cd81	0.00686805
interacts with	Cst3 (interacts with) H2-Pb	0.0068197
interacts with	Cst3 (interacts with) 9430037O13Rik	0.00681466
interacts with	Nrg1 (interacts with) Fancd2os	0.0123655
interacts with	Nrg1 (interacts with) Mir99ahg	0.0109813
interacts with	Nrg1 (interacts with) Gpc5	0.0105847
interacts with	Nrg1 (interacts with) Ptprz1	0.0104791
interacts with	Nrg1 (interacts with) Gm29260	0.00958973
interacts with	Nrg1 (interacts with) Gm18698	0.00939981
interacts with	Nrg1 (interacts with) Gm10634	0.00801332
interacts with	Nrg1 (interacts with) Cadm2	0.00766739
interacts with	Nrg1 (interacts with) Nkain2	0.00764803
interacts with	Nrg1 (interacts with) Agt	0.00721249
interacts with	Nrg1 (interacts with) Hhatl	0.00658134
interacts with	Ntrk2 (interacts with) Cd300lb	0.0121774
interacts with	Ntrk2 (interacts with) Gm12108	0.00804032
interacts with	Ntrk2 (interacts with) Tex35	0.00776475
interacts with	Ntrk2 (interacts with) Gm13022	0.00734762
interacts with	Ntrk2 (interacts with) Gm2076	0.00685189
interacts with	Trpm3 (interacts with) Gpc5	0.0121488
interacts with	Trpm3 (interacts with) Nr2f1	0.0111611
interacts with	Trpm3 (interacts with) Ms4a8a	0.00915866
interacts with	Trpm3 (interacts with) Nkain2	0.00804905
interacts with	Trpm3 (interacts with) Gm44059	0.00792869
interacts with	Trpm3 (interacts with) Tmod4	0.00766997
interacts with	Trpm3 (interacts with) Rbp1	0.006786
interacts with	Trpm3 (interacts with) Urah	0.00663167
interacts with	Gpc5 (interacts with) Nrg1	0.00947846
interacts with	Gpc5 (interacts with) Trpm3	0.00883684
interacts with	Cpe (interacts with) Cst3	0.00904518
interacts with	Maff (interacts with) Btg2	0.0105102
interacts with	Maff (interacts with) Egr1	0.00751724
interacts with	Maff (interacts with) Fos	0.0070658
interacts with	Dclk1 (interacts with) Gm21954	0.0115241
interacts with	Dclk1 (interacts with) Isl1	0.00884544
interacts with	Dclk1 (interacts with) RP23-416K18.1	0.00735049
interacts with	Dclk1 (interacts with) Gm5940	0.007092
interacts with	Dclk1 (interacts with) Coq10b	0.00687694
interacts with	Dclk1 (interacts with) Vps37b	0.00668392
interacts with	Dclk1 (interacts with) Gm45350	0.00655858
interacts with	Mir99ahg (interacts with) Nrg1	0.00729573
interacts with	Gltscr2 (interacts with) Vps37b	0.00928447
interacts with	Gltscr2 (interacts with) Slc25a3	0.00797538
interacts with	Dad1 (interacts with) Slc25a3	0.00959337
interacts with	Dad1 (interacts with) Vps37b	0.00861505
interacts with	Prdx6 (interacts with) Gm15854	0.0106704
interacts with	Prdx6 (interacts with) 6330403K07Rik	0.00819908
interacts with	Prdx6 (interacts with) Gm28513	0.00768753
interacts with	Prdx6 (interacts with) Gm5796	0.00713448
interacts with	Prdx6 (interacts with) Olfr657	0.00696092
interacts with	Prdx6 (interacts with) Gm12463	0.00682388
interacts with	Prdx6 (interacts with) Sema3f	0.00668692
interacts with	Actg1 (interacts with) Fos	0.00726287
interacts with	Cyr61 (interacts with) Btg2	0.00750349
interacts with	Cyr61 (interacts with) Fos	0.00721972
interacts with	Pde10a (interacts with) Vps37b	0.00937887
interacts with	Pde10a (interacts with) Slc25a3	0.00880079
interacts with	Tuba1a (interacts with) RP23-240G3.3	0.00991938
interacts with	Tuba1a (interacts with) Gm12257	0.00828402
interacts with	Tuba1a (interacts with) Gm5796	0.00815741
interacts with	Tuba1a (interacts with) L1cam	0.00776179
interacts with	Tuba1a (interacts with) Gm28513	0.00768286
interacts with	Tuba1a (interacts with) St18	0.00737477
interacts with	Tuba1a (interacts with) Dlx5	0.00678947
interacts with	Tuba1a (interacts with) Gm8994	0.00670254
interacts with	Pantr1 (interacts with) RP23-193A14.5	0.00985873
interacts with	Apoe (interacts with) Cst3	0.00982201
interacts with	Apoe (interacts with) Aldoc	0.00654869
interacts with	Mt3 (interacts with) Prdx6	0.00953644
interacts with	Mt3 (interacts with) Cst3	0.00733287
interacts with	Mt3 (interacts with) Aldoc	0.00701551
interacts with	Itm2b (interacts with) Cst3	0.00672339
interacts with	Urah (interacts with) Cldn6	0.00929759
interacts with	Urah (interacts with) Gm11764	0.00778587
interacts with	Urah (interacts with) Gm13578	0.00771072
interacts with	Urah (interacts with) Gm26760	0.00684571
interacts with	Nr4a3 (interacts with) Btg2	0.00837794
interacts with	Clu (interacts with) Aldoc	0.00845628
interacts with	Clu (interacts with) Cst3	0.00691271
interacts with	Klf4 (interacts with) Egr1	0.00841603
interacts with	Enho (interacts with) 6330403K07Rik	0.00752636
interacts with	Btbd9 (interacts with) Vps37b	0.00683286
interacts with	Ptn (interacts with) Tspan7	0.00772825
interacts with	Tspan7 (interacts with) Gm8994	0.00724493
interacts with	Tspan7 (interacts with) Gm45042	0.00700794
interacts with	Cadm2 (interacts with) Nrg1	0.00681299
interacts with	Gfap (interacts with) Cebpd	0.00763532
interacts with	Mt1 (interacts with) Aldoc	0.00761403

## Sheet: CrymNetwork_VentralB_nodes
name	LogFold	Marker
Gpr55		FALSE
Gm13791		FALSE
Cybb		FALSE
Tmem95		FALSE
Gm4849		FALSE
Gm21986		FALSE
6720469O03Rik		FALSE
Gm14341		FALSE
Nectin4		FALSE
Gm45552		FALSE
Hdac3		FALSE
Tmem25		FALSE
Gm44851		FALSE
RP23-193A14.2		FALSE
5930412G12Rik		FALSE
Akain1		FALSE
Cwc25	-0.381516	TRUE
Slco5a1		FALSE
Ptgs2		FALSE
Tomm40		FALSE
Cyp1b1		FALSE
Ppcs		FALSE
Phf24		FALSE
Ttc5		FALSE
Adamts8		FALSE
Adamts18	0.678156	TRUE
Plekho2		FALSE
1700082M22Rik		FALSE
Prrt4		FALSE
Gm45871		FALSE
Gm7967		FALSE
Upf3b		FALSE
Cd300ld		FALSE
Topors		FALSE
Gm35013		FALSE
Ptn		FALSE
Cspg5	0.269663	TRUE
Nrg1	-1.21756	TRUE
Rab34		FALSE
Slc35d3		FALSE
Bmp7		FALSE
Gm9946		FALSE
Sncb		FALSE
Rpe65		FALSE
Tmem87a		FALSE
Terf2ip		FALSE
Wwtr1	0.19674	TRUE
Gm19744		FALSE
Dpysl3		FALSE
Cdcp1		FALSE
Gm26525		FALSE
Syt9		FALSE
Tmem41b		FALSE
Crym	2.03923	TRUE
Lmo1	0.369653	TRUE
Pomc		FALSE
RP23-174E11.2		FALSE
Gm43338		FALSE
Slc6a6	0.286599	TRUE
Tpm1		FALSE
Tbx6		FALSE
Chat		FALSE
Klrg2		FALSE
Dennd1a		FALSE
BC049352		FALSE
Prss12		FALSE
Trim62		FALSE
Gm44636		FALSE
Prkg2		FALSE
Tcf4		FALSE
Ddah1		FALSE
Mfrp		FALSE
Gm43126		FALSE
Gm15402		FALSE
Dcun1d3	0.253786	TRUE
Nlrp4a		FALSE
G730013B05Rik		FALSE
Gm5645		FALSE
Kynu		FALSE
Xkr6		FALSE
Itih3	0.25001	TRUE
Gm1604a		FALSE
Kif18b		FALSE
Anxa11os		FALSE
Slc26a3		FALSE
Vcan		FALSE
Catsper2		FALSE
Urah	-1.27	TRUE
Dgkeos		FALSE
Rnpc3		FALSE
Gm2061		FALSE
Gm37158		FALSE
Wls		FALSE
Zfp101		FALSE
Zfp87		FALSE
Gm29018		FALSE
Pik3r5		FALSE
Wars2		FALSE
Havcr2		FALSE
Coa7		FALSE
Cln5		FALSE
Mst1r		FALSE
Tmem253		FALSE
Gm43254		FALSE
Lvrn		FALSE
Col9a1		FALSE
Khdrbs1		FALSE
Gm4211		FALSE
Basp1	0.546825	TRUE
Gm44841		FALSE
Itga10		FALSE
mt-Rnr2	0.141098	TRUE
Gm15137		FALSE
Prkd1		FALSE
Prss56	0.824684	TRUE
Gm29088		FALSE
Col5a1		FALSE
Smc2		FALSE
Ccdc71		FALSE
Slc1a2		FALSE
Ppcdc		FALSE
Gm15246		FALSE
Foxr2		FALSE
Fam171b	0.216489	TRUE
Parg		FALSE
Trpm3	-0.248296	TRUE
Mterf1a		FALSE
Ak3		FALSE
Cxcl17		FALSE
Nr1h3		FALSE
Pef1		FALSE
Hspe1		FALSE
Gm10305		FALSE
Rbp1	-0.193471	TRUE
Rsu1		FALSE
Runx2os1		FALSE
C920021L13Rik		FALSE
Gm44890		FALSE
Gm19684		FALSE
Pes1		FALSE
BC030343		FALSE
2010013B24Rik		FALSE
Snu13		FALSE
Rasip1		FALSE
Ibtk		FALSE
Ceacam1		FALSE
Lmx1a		FALSE
Pfkp		FALSE
Rcan1		FALSE
Eif4e		FALSE
Ptch2		FALSE
Acadl		FALSE
Padi2	-0.136968	TRUE
Slc22a22		FALSE
BC005624		FALSE
Gm45339		FALSE
Usp33		FALSE
Gm44593		FALSE
Pank2		FALSE
Gm13028		FALSE
Cpa6		FALSE
Pemt		FALSE
Zfp189		FALSE
Tom1		FALSE
Syn2	0.17625	TRUE
Col17a1		FALSE
Gcnt4		FALSE
Uggt2		FALSE
RP23-394M6.4		FALSE
Gm11773		FALSE
Gm9968		FALSE
Pglyrp4		FALSE
Gpn1		FALSE
RP23-326C6.1		FALSE
Dcc	-0.493621	TRUE
Apoc3		FALSE
Gsk3b		FALSE
Pcbd1		FALSE
Luzp2	-0.205277	TRUE
Vcl	0.273296	TRUE
Nptx2	0.213257	TRUE
Srsf4		FALSE
H2afj		FALSE
Gm44701		FALSE
Hcst		FALSE
Eno4		FALSE
Aagab		FALSE
Htatip2		FALSE
Pi15		FALSE
AW822252		FALSE
Zfp408		FALSE
Creld1		FALSE
Surf6		FALSE
Ifrd2		FALSE
Kcng2		FALSE
Rpl31-ps16		FALSE
Gm12602		FALSE
Nat1		FALSE
Mfsd13b		FALSE
Tmem181c-ps		FALSE
Pold3		FALSE
Cant1		FALSE
Meiob		FALSE
Eva1c		FALSE
Dym		FALSE
Pdss2		FALSE
9930014A18Rik		FALSE
Sacs		FALSE
Lmna		FALSE
N4bp2l1		FALSE
Rtn4		FALSE
Vamp2		FALSE
Arhgap12		FALSE
Ssbp3	-0.328354	TRUE
Gm18422		FALSE
Ankub1		FALSE
Fen1		FALSE
Gja1	0.182661	TRUE
RP23-305G22.3		FALSE
Gm16068		FALSE
Kctd1	-0.153368	TRUE
Myom3		FALSE
Atp6v1d		FALSE
Nemp1		FALSE
Gm45212		FALSE
RP23-442N6.1		FALSE
Ppp1r1c		FALSE
Pdlim4		FALSE
A630095N17Rik		FALSE
Ndrg4		FALSE
Fars2		FALSE
Gm27022		FALSE
Ccbe1		FALSE
Cep162		FALSE
Prdx6		FALSE
Rbm11		FALSE
Alpk2		FALSE
Gm45769		FALSE
Dbi		FALSE
Chrnb4		FALSE
Pla2g2c		FALSE
Neu3		FALSE
Synpr		FALSE

## Sheet: CrymNetwork_VentralB_edges
interaction	name	weight
interacts with	Gpr55 (interacts with) Gm13791	0.0236074
interacts with	Gpr55 (interacts with) 6720469O03Rik	0.0175814
interacts with	Gpr55 (interacts with) Akain1	0.0141949
interacts with	Gpr55 (interacts with) 1700082M22Rik	0.0120757
interacts with	Gpr55 (interacts with) RP23-193A14.2	0.0098136
interacts with	Gpr55 (interacts with) Nectin4	0.00922571
interacts with	Gpr55 (interacts with) Gm7967	0.00846644
interacts with	Gpr55 (interacts with) Gm45552	0.00588119
interacts with	Gm13791 (interacts with) Gm45552	0.00980198
interacts with	Gm13791 (interacts with) Gpr55	0.00597046
interacts with	Cybb (interacts with) Tmem95	0.0198541
interacts with	Tmem95 (interacts with) Gm14341	0.0171931
interacts with	Tmem95 (interacts with) Cybb	0.0142592
interacts with	Tmem95 (interacts with) Gm26525	0.0095299
interacts with	Tmem95 (interacts with) Mst1r	0.00716995
interacts with	Tmem95 (interacts with) Tmem253	0.00711062
interacts with	Tmem95 (interacts with) Gm9946	0.00592734
interacts with	Tmem95 (interacts with) Bmp7	0.0057046
interacts with	Tmem95 (interacts with) Rpl31-ps16	0.0056759
interacts with	Tmem95 (interacts with) Gm37158	0.00524766
interacts with	Gm4849 (interacts with) Gm21986	0.0194714
interacts with	Gm21986 (interacts with) Gm4849	0.00992856
interacts with	Gm21986 (interacts with) Rpe65	0.00990878
interacts with	Gm21986 (interacts with) Gm43338	0.00590939
interacts with	Gm21986 (interacts with) RP23-394M6.4	0.00588233
interacts with	6720469O03Rik (interacts with) Gm45552	0.00775881
interacts with	6720469O03Rik (interacts with) Gpr55	0.00607564
interacts with	Gm14341 (interacts with) Tmem95	0.0121345
interacts with	Nectin4 (interacts with) Gm45552	0.0171857
interacts with	Gm45552 (interacts with) 1700082M22Rik	0.0120187
interacts with	Gm45552 (interacts with) Gpr55	0.0119272
interacts with	Gm45552 (interacts with) Nectin4	0.00931225
interacts with	Gm45552 (interacts with) Gm13791	0.00599013
interacts with	Gm45552 (interacts with) Gm13028	0.00596973
interacts with	Gm45552 (interacts with) Gm7967	0.0059675
interacts with	Gm45552 (interacts with) RP23-193A14.2	0.00588775
interacts with	Hdac3 (interacts with) Gm45552	0.0169806
interacts with	Hdac3 (interacts with) Gpr55	0.0101261
interacts with	Tmem25 (interacts with) Gm44851	0.0157041
interacts with	Gm44851 (interacts with) Gm44841	0.0070135
interacts with	Gm44851 (interacts with) A630095N17Rik	0.00526132
interacts with	Gm44851 (interacts with) Gm27022	0.00523557
interacts with	RP23-193A14.2 (interacts with) Gpr55	0.014748
interacts with	5930412G12Rik (interacts with) Gm21986	0.0142548
interacts with	Akain1 (interacts with) Gpr55	0.00990807
interacts with	Akain1 (interacts with) Gm45552	0.00887602
interacts with	Cwc25 (interacts with) Gm21986	0.0140875
interacts with	Slco5a1 (interacts with) Ptgs2	0.0139512
interacts with	Ptgs2 (interacts with) Slco5a1	0.0091518
interacts with	Tomm40 (interacts with) Gm44851	0.0136854
interacts with	Cyp1b1 (interacts with) Tmem95	0.0136735
interacts with	Ppcs (interacts with) Phf24	0.0129547
interacts with	Phf24 (interacts with) BC049352	0.00847278
interacts with	Phf24 (interacts with) Cd300ld	0.00822931
interacts with	Phf24 (interacts with) Gm5645	0.00791118
interacts with	Ttc5 (interacts with) Adamts8	0.0126297
interacts with	Ttc5 (interacts with) Gm35013	0.0108884
interacts with	Ttc5 (interacts with) Slco5a1	0.00661587
interacts with	Ttc5 (interacts with) Phf24	0.00574201
interacts with	Adamts8 (interacts with) Zfp101	0.00536456
interacts with	Adamts18 (interacts with) Gm44851	0.0124366
interacts with	Plekho2 (interacts with) Gm21986	0.0121191
interacts with	1700082M22Rik (interacts with) Gpr55	0.00810086
interacts with	Prrt4 (interacts with) Gm21986	0.0117831
interacts with	Gm45871 (interacts with) Gm45552	0.0117272
interacts with	Gm7967 (interacts with) Gm45552	0.0117104
interacts with	Gm7967 (interacts with) Gpr55	0.00596461
interacts with	Upf3b (interacts with) Phf24	0.0115571
interacts with	Cd300ld (interacts with) Phf24	0.0115129
interacts with	Topors (interacts with) Tmem95	0.0111679
interacts with	Ptn (interacts with) Cspg5	0.0108188
interacts with	Ptn (interacts with) Slc35d3	0.0102453
interacts with	Ptn (interacts with) Cdcp1	0.0095921
interacts with	Ptn (interacts with) Slc6a6	0.00892837
interacts with	Ptn (interacts with) Nrg1	0.00853135
interacts with	Ptn (interacts with) Ddah1	0.00809164
interacts with	Ptn (interacts with) Nlrp4a	0.00793447
interacts with	Ptn (interacts with) Gm29018	0.00724054
interacts with	Ptn (interacts with) Crym	0.00712479
interacts with	Ptn (interacts with) Gm15137	0.00690893
interacts with	Ptn (interacts with) Prss56	0.00686498
interacts with	Ptn (interacts with) Foxr2	0.00676543
interacts with	Ptn (interacts with) Fam171b	0.00674438
interacts with	Ptn (interacts with) Rbp1	0.00654243
interacts with	Ptn (interacts with) Ceacam1	0.00620751
interacts with	Ptn (interacts with) Padi2	0.00610241
interacts with	Ptn (interacts with) Trpm3	0.00589077
interacts with	Ptn (interacts with) Gm11773	0.00587435
interacts with	Ptn (interacts with) Luzp2	0.0058081
interacts with	Ptn (interacts with) Mfsd13b	0.00562962
interacts with	Ptn (interacts with) Fars2	0.00525461
interacts with	Ptn (interacts with) Ccbe1	0.00523512
interacts with	Ptn (interacts with) Prdx6	0.0052326
interacts with	Ptn (interacts with) Rbm11	0.00521094
interacts with	Cspg5 (interacts with) Ptn	0.00698269
interacts with	Nrg1 (interacts with) Ptn	0.0105508
interacts with	Rab34 (interacts with) Gm44851	0.0104677
interacts with	Bmp7 (interacts with) Tmem95	0.0101319
interacts with	Gm9946 (interacts with) Tmem95	0.0100117
interacts with	Sncb (interacts with) Phf24	0.009947
interacts with	Rpe65 (interacts with) Gm21986	0.00742058
interacts with	Tmem87a (interacts with) Gm35013	0.00988492
interacts with	Tmem87a (interacts with) Gm19744	0.00983557
interacts with	Tmem87a (interacts with) Gm19684	0.00633646
interacts with	Terf2ip (interacts with) Gm35013	0.00988436
interacts with	Terf2ip (interacts with) Adamts8	0.00979071
interacts with	Terf2ip (interacts with) Slc26a3	0.00578491
interacts with	Wwtr1 (interacts with) Gm35013	0.00985879
interacts with	Gm19744 (interacts with) Gm29088	0.00676754
interacts with	Gm19744 (interacts with) Pglyrp4	0.00587153
interacts with	Gm19744 (interacts with) Gm35013	0.00585524
interacts with	Gm19744 (interacts with) Gm16068	0.00537785
interacts with	Dpysl3 (interacts with) Phf24	0.00981602
interacts with	Gm26525 (interacts with) Tmem95	0.00686846
interacts with	Syt9 (interacts with) Tmem95	0.00929475
interacts with	Tmem41b (interacts with) Gm44851	0.00929132
interacts with	Crym (interacts with) Lmo1	0.00927815
interacts with	Crym (interacts with) Gpr55	0.00890834
interacts with	Crym (interacts with) Ptn	0.00864373
interacts with	Crym (interacts with) Dgkeos	0.00736227
interacts with	Crym (interacts with) Gm35013	0.00693836
interacts with	Crym (interacts with) Slc26a3	0.00657775
interacts with	Crym (interacts with) Gm19744	0.00641485
interacts with	Crym (interacts with) Gm19684	0.00639377
interacts with	Crym (interacts with) Tbx6	0.00607106
interacts with	Crym (interacts with) Slco5a1	0.00595078
interacts with	Crym (interacts with) Adamts8	0.00583948
interacts with	Crym (interacts with) Gm44851	0.0057923
interacts with	Crym (interacts with) Gm21986	0.00570175
interacts with	Crym (interacts with) Gm12602	0.00564048
interacts with	Crym (interacts with) Gm45552	0.0054031
interacts with	Crym (interacts with) Phf24	0.00525404
interacts with	Lmo1 (interacts with) Prkg2	0.00817052
interacts with	Lmo1 (interacts with) Kif18b	0.00770532
interacts with	Lmo1 (interacts with) Gm15246	0.00677582
interacts with	Lmo1 (interacts with) Hcst	0.00576696
interacts with	Lmo1 (interacts with) Meiob	0.00557065
interacts with	Lmo1 (interacts with) Gm45769	0.0051956
interacts with	Pomc (interacts with) Tmem95	0.00926198
interacts with	RP23-174E11.2 (interacts with) Tmem95	0.00917087
interacts with	Gm43338 (interacts with) Gm21986	0.00900026
interacts with	Tpm1 (interacts with) Gpr55	0.00888477
interacts with	Tbx6 (interacts with) Chat	0.0086357
interacts with	Tbx6 (interacts with) Cxcl17	0.00663643
interacts with	Tbx6 (interacts with) RP23-326C6.1	0.00586702
interacts with	Klrg2 (interacts with) Phf24	0.00863558
interacts with	Dennd1a (interacts with) Gm44851	0.00862874
interacts with	Prss12 (interacts with) Gpr55	0.00832655
interacts with	Trim62 (interacts with) Gm44636	0.00832089
interacts with	Tcf4 (interacts with) Gm44851	0.00810854
interacts with	Mfrp (interacts with) Tmem95	0.00808412
interacts with	Gm43126 (interacts with) Gm21986	0.00804569
interacts with	Gm15402 (interacts with) Tmem95	0.00804329
interacts with	Dcun1d3 (interacts with) Tmem95	0.00803405
interacts with	G730013B05Rik (interacts with) Gpr55	0.00792392
interacts with	Gm5645 (interacts with) Phf24	0.00684475
interacts with	Kynu (interacts with) Gpr55	0.00789287
interacts with	Xkr6 (interacts with) Gm44851	0.00785205
interacts with	Itih3 (interacts with) Gm19744	0.00782889
interacts with	Itih3 (interacts with) Adamts8	0.005982
interacts with	Itih3 (interacts with) Gm35013	0.00561257
interacts with	Itih3 (interacts with) Slco5a1	0.0055225
interacts with	Itih3 (interacts with) Slc26a3	0.00539119
interacts with	Gm1604a (interacts with) Gm45552	0.00771913
interacts with	Anxa11os (interacts with) Slc26a3	0.00766415
interacts with	Slc26a3 (interacts with) Lmx1a	0.00620433
interacts with	Slc26a3 (interacts with) Anxa11os	0.00571708
interacts with	Slc26a3 (interacts with) Gm18422	0.00540731
interacts with	Vcan (interacts with) Gm44851	0.00764238
interacts with	Vcan (interacts with) Tmem95	0.00521201
interacts with	Catsper2 (interacts with) Gm45552	0.00752971
interacts with	Urah (interacts with) Dgkeos	0.00752088
interacts with	Dgkeos (interacts with) Kcng2	0.00568155
interacts with	Dgkeos (interacts with) Chrnb4	0.00516759
interacts with	Rnpc3 (interacts with) Gpr55	0.00744377
interacts with	Gm2061 (interacts with) Gm44851	0.00736323
interacts with	Gm37158 (interacts with) Tmem95	0.00736028
interacts with	Wls (interacts with) Gm21986	0.0073511
interacts with	Zfp101 (interacts with) Adamts8	0.00730566
interacts with	Zfp87 (interacts with) Gpr55	0.00729
interacts with	Pik3r5 (interacts with) Dgkeos	0.0072281
interacts with	Wars2 (interacts with) Adamts8	0.00722732
interacts with	Wars2 (interacts with) Gm35013	0.00594792
interacts with	Wars2 (interacts with) Gm19744	0.00591881
interacts with	Wars2 (interacts with) Slc26a3	0.00515862
interacts with	Havcr2 (interacts with) Dgkeos	0.00722703
interacts with	Coa7 (interacts with) Phf24	0.00720076
interacts with	Cln5 (interacts with) Tmem95	0.00717304
interacts with	Mst1r (interacts with) Tmem95	0.00604112
interacts with	Gm43254 (interacts with) Tmem95	0.00710615
interacts with	Lvrn (interacts with) Phf24	0.00709748
interacts with	Col9a1 (interacts with) Gm21986	0.00708173
interacts with	Khdrbs1 (interacts with) Slc26a3	0.00705849
interacts with	Gm4211 (interacts with) Gm21986	0.00703809
interacts with	Basp1 (interacts with) Tmem95	0.00701537
interacts with	Itga10 (interacts with) Gm21986	0.00699463
interacts with	mt-Rnr2 (interacts with) Gm35013	0.00691916
interacts with	Prkd1 (interacts with) Gm19744	0.00688996
interacts with	Gm29088 (interacts with) Gm19744	0.00685882
interacts with	Col5a1 (interacts with) Tmem95	0.00685162
interacts with	Smc2 (interacts with) Adamts8	0.00684206
interacts with	Ccdc71 (interacts with) Adamts8	0.0068111
interacts with	Slc1a2 (interacts with) Ptn	0.00679685
interacts with	Ppcdc (interacts with) Slco5a1	0.00678711
interacts with	Parg (interacts with) Gm44851	0.00673569
interacts with	Trpm3 (interacts with) Ptn	0.00669432
interacts with	Mterf1a (interacts with) Gpr55	0.00669193
interacts with	Ak3 (interacts with) Gm21986	0.00664638
interacts with	Nr1h3 (interacts with) Slco5a1	0.00662606
interacts with	Pef1 (interacts with) Adamts8	0.00661238
interacts with	Hspe1 (interacts with) Gpr55	0.00657201
interacts with	Gm10305 (interacts with) Dgkeos	0.00656442
interacts with	Rsu1 (interacts with) Slc26a3	0.00650931
interacts with	Runx2os1 (interacts with) Gm44851	0.00648424
interacts with	C920021L13Rik (interacts with) Dgkeos	0.00647131
interacts with	Gm44890 (interacts with) Gpr55	0.00643318
interacts with	Pes1 (interacts with) Gm35013	0.00636162
interacts with	BC030343 (interacts with) Phf24	0.00633309
interacts with	2010013B24Rik (interacts with) Adamts8	0.00632793
interacts with	Snu13 (interacts with) Tmem95	0.00625342
interacts with	Rasip1 (interacts with) Gm44851	0.00624517
interacts with	Ibtk (interacts with) Gm21986	0.00623419
interacts with	Pfkp (interacts with) Gm45552	0.00617823
interacts with	Rcan1 (interacts with) Gm35013	0.00617812
interacts with	Rcan1 (interacts with) Gm19684	0.00605284
interacts with	Eif4e (interacts with) Gm44851	0.00617367
interacts with	Ptch2 (interacts with) Gm44851	0.00612231
interacts with	Acadl (interacts with) Gm21986	0.00610918
interacts with	Slc22a22 (interacts with) Gm45552	0.00608128
interacts with	BC005624 (interacts with) Gm21986	0.00607477
interacts with	Gm45339 (interacts with) Gm21986	0.00604074
interacts with	Usp33 (interacts with) Gpr55	0.006021
interacts with	Gm44593 (interacts with) Gpr55	0.0060006
interacts with	Pank2 (interacts with) Gm44851	0.00599865
interacts with	Gm13028 (interacts with) Gm45552	0.00579192
interacts with	Cpa6 (interacts with) Gm44851	0.00596914
interacts with	Pemt (interacts with) Gpr55	0.00596824
interacts with	Zfp189 (interacts with) Gm45552	0.00596026
interacts with	Tom1 (interacts with) Tmem95	0.00594014
interacts with	Syn2 (interacts with) Gpr55	0.00593741
interacts with	Col17a1 (interacts with) Gm21986	0.00592154
interacts with	Gcnt4 (interacts with) Gm19744	0.0059188
interacts with	Uggt2 (interacts with) Gm35013	0.00590389
interacts with	Uggt2 (interacts with) Gm19744	0.00587179
interacts with	Gm9968 (interacts with) Adamts8	0.00587338
interacts with	Gm9968 (interacts with) Slc26a3	0.00546407
interacts with	Gm9968 (interacts with) Dgkeos	0.00520137
interacts with	Gpn1 (interacts with) Adamts8	0.00587084
interacts with	Dcc (interacts with) Gpr55	0.00586176
interacts with	Apoc3 (interacts with) Tmem95	0.00583922
interacts with	Gsk3b (interacts with) Gm35013	0.00583316
interacts with	Pcbd1 (interacts with) Gpr55	0.00581391
interacts with	Vcl (interacts with) Tmem95	0.00580046
interacts with	Nptx2 (interacts with) Gm21986	0.00579261
interacts with	Srsf4 (interacts with) Slc26a3	0.0057915
interacts with	H2afj (interacts with) Phf24	0.00578422
interacts with	Gm44701 (interacts with) Phf24	0.00578181
interacts with	Eno4 (interacts with) Adamts8	0.00575705
interacts with	Aagab (interacts with) Gm19684	0.00572459
interacts with	Htatip2 (interacts with) Gm45552	0.00572327
interacts with	Pi15 (interacts with) Tmem95	0.00572208
interacts with	AW822252 (interacts with) Gm45552	0.0057149
interacts with	Zfp408 (interacts with) Gm44851	0.00571292
interacts with	Creld1 (interacts with) Tmem95	0.00569892
interacts with	Surf6 (interacts with) Tmem95	0.005697
interacts with	Ifrd2 (interacts with) Tmem95	0.00568989
interacts with	Nat1 (interacts with) Gm45552	0.00563886
interacts with	Tmem181c-ps (interacts with) Gm19684	0.00561678
interacts with	Pold3 (interacts with) Tmem95	0.0056064
interacts with	Cant1 (interacts with) Dgkeos	0.00558376
interacts with	Eva1c (interacts with) Gm45552	0.00553534
interacts with	Dym (interacts with) Gm44851	0.00551314
interacts with	Pdss2 (interacts with) Tmem95	0.00550403
interacts with	9930014A18Rik (interacts with) Phf24	0.00549906
interacts with	Sacs (interacts with) Tmem95	0.00548662
interacts with	Lmna (interacts with) Gm19684	0.00545488
interacts with	N4bp2l1 (interacts with) Tmem95	0.00545331
interacts with	Rtn4 (interacts with) Gm35013	0.00544683
interacts with	Vamp2 (interacts with) Dgkeos	0.00544132
interacts with	Arhgap12 (interacts with) Gm19744	0.00542941
interacts with	Ssbp3 (interacts with) Gm21986	0.00541969
interacts with	Ankub1 (interacts with) Gm19684	0.00540503
interacts with	Fen1 (interacts with) Gm44636	0.00539653
interacts with	Gja1 (interacts with) Gm12602	0.00539216
interacts with	RP23-305G22.3 (interacts with) Gpr55	0.00537866
interacts with	Kctd1 (interacts with) Gpr55	0.00536319
interacts with	Myom3 (interacts with) Gpr55	0.00536002
interacts with	Atp6v1d (interacts with) Phf24	0.00533711
interacts with	Nemp1 (interacts with) Adamts8	0.00533684
interacts with	Gm45212 (interacts with) Gm21986	0.00532707
interacts with	RP23-442N6.1 (interacts with) Tmem95	0.00531789
interacts with	Ppp1r1c (interacts with) Slco5a1	0.00530293
interacts with	Pdlim4 (interacts with) Gm21986	0.00526824
interacts with	Ndrg4 (interacts with) Slco5a1	0.00525767
interacts with	Cep162 (interacts with) Gm44851	0.00523277
interacts with	Alpk2 (interacts with) Gm44851	0.00520662
interacts with	Dbi (interacts with) Ptn	0.00517028
interacts with	Pla2g2c (interacts with) Gm21986	0.00515594
interacts with	Neu3 (interacts with) Gpr55	0.00515393
interacts with	Synpr (interacts with) Slc26a3	0.00515359
