# Supplementary material for: Single-cell analysis of the ventricular-subventricular zone reveals signatures of dorsal and ventral adult neurogenesis
Source: eLife. 2021 Jul 14;10:e67436. doi: 10.7554/eLife.67436 (PMC8443251; doi:10.7554/eLife.67436)
Supplement: Figure 3—source data 1. [file elife-67436-fig3-data1.xlsx]

## Sheet: Summary worksheet - Figure 3 Pa
Figure 3 Panels M, R and W raw data. (These files were used as input data to R)
	RNAscope probe	Sample (mouse)	Figure 3 panel	Data
Spots tool:
Sample 1-Crym+S100b-Position	Crym	1	W	Spots/ Position
Sample 2-Crym+S100b-Position	Crym	2	W	Spots/ Position
Sample 3-Crym+S100b-Position	Crym	3	W	Spots/ Position
Sample 1-Dio2+S100b-Position	Dio2	1	M	Spots/ Position
Sample 2-Dio2+S100b-Position	Dio2	2	M	Spots/ Position
Sample 3-Dio2+S100b-Position	Dio2	3	M	Spots/ Position
Sample 1-Urah+S100b-Position	Urah	1	R	Spots/ Position
Sample 2-Urah+S100b-Position	Urah	2	R	Spots/ Position
Sample 3-Urah+S100b-Position	Urah	3	R	Spots/ Position
Measurement tool:
Sample 1 Crym+S100b-V-SVZ Distance Position	Crym	1	W	Coordinates for way points for V-SVZ reference line
Sample 2 Crym+S100b-V-SVZ Distance Position	Crym	2	W	Coordinates for way points for V-SVZ reference line
Sample 3 Crym+S100b-V-SVZ Distance Position	Crym	3	W	Coordinates for way points for V-SVZ reference line
Sample 1 Dio2+S100b-V-SVZ Distance Position	Dio2	1	M	Coordinates for way points for V-SVZ reference line
Sample 2 Dio2+S100b-V-SVZ Distance Position	Dio2	2	M	Coordinates for way points for V-SVZ reference line
Sample 3 Dio2+S100b-V-SVZ Distance Position	Dio2	3	M	Coordinates for way points for V-SVZ reference line
Sample 1 Urah+S100b-V-SVZ Distance Position	Urah	1	R	Coordinates for way points for V-SVZ reference line
Sample 1 Urah+S100b-V-SVZ Distance Position	Urah	2	R	Coordinates for way points for V-SVZ reference line
Sample 1 Urah+S100b-V-SVZ Distance Position	Urah	3	R	Coordinates for way points for V-SVZ reference line

## Sheet: Sample 1-Crym+S100b-Position - 
AC335 Crym 555S100b 488_R_[ii26_TileScan_1_Merged_Image_27]_Position
Position
====================
Position X	Position Y	Position Z	Unit	Category	Collection	Time	S100b	dapi	ID
68895.8	41757.8	0.1501	µm	Spot	Position	1		DAPI-	10
68884.9	41762.8	0.1501	µm	Spot	Position	1		DAPI-	13
68860.9	41764.4	0.1501	µm	Spot	Position	1		DAPI-	15
68864.9	41766.1	0.1501	µm	Spot	Position	1		DAPI-	16
68874.3	41771.3	0.1501	µm	Spot	Position	1		DAPI-	20
68918.2	41758.7	0.1501	µm	Spot	Position	1		DAPI-	22
68909.7	41763.8	0.1501	µm	Spot	Position	1		DAPI-	25
68912.8	41759.4	0.375914	µm	Spot	Position	1		DAPI-	27
68929.5	41764.3	0.480261	µm	Spot	Position	1		DAPI-	28
68926.4	41759.2	1.08729	µm	Spot	Position	1		DAPI-	31
68914.9	41761.3	0.965478	µm	Spot	Position	1		DAPI-	32
68910	41763.9	0.938727	µm	Spot	Position	1		DAPI-	34
68907.2	41764.1	1.06965	µm	Spot	Position	1		DAPI-	35
68649.9	41877.3	0.514788	µm	Spot	Position	1		DAPI-	52
68663.3	41872.4	0.707206	µm	Spot	Position	1		DAPI-	55
68849.1	41769.4	1.70552	µm	Spot	Position	1		DAPI-	73
68848.1	41761.5	1.98005	µm	Spot	Position	1		DAPI-	74
68854.9	41768.3	1.91092	µm	Spot	Position	1		DAPI-	77
68857.4	41758.4	2.23627	µm	Spot	Position	1		DAPI-	80
68858.5	41759.3	2.2609	µm	Spot	Position	1		DAPI-	81
68852.1	41760.3	2.20191	µm	Spot	Position	1		DAPI-	82
68826.8	41764.3	2.27133	µm	Spot	Position	1		DAPI-	84
68847.7	41768	2.27862	µm	Spot	Position	1		DAPI-	86
68853.3	41770.3	2.22148	µm	Spot	Position	1		DAPI-	87
68849.1	41770.8	2.27872	µm	Spot	Position	1		DAPI-	88
68917.3	41758.5	1.28238	µm	Spot	Position	1		DAPI-	101
68930.9	41759.7	1.4534	µm	Spot	Position	1		DAPI-	102
68913.1	41759.8	1.23917	µm	Spot	Position	1		DAPI-	103
68925.6	41758.9	1.78484	µm	Spot	Position	1		DAPI-	105
68933.9	41760.4	1.62098	µm	Spot	Position	1		DAPI-	106
68913.8	41757.1	1.92193	µm	Spot	Position	1		DAPI-	107
68919.9	41758.2	1.96745	µm	Spot	Position	1		DAPI-	108
68919.9	41764.7	2.07558	µm	Spot	Position	1		DAPI-	112
68943.1	41766.4	1.86874	µm	Spot	Position	1		DAPI-	113
68946.5	41766.8	2.32461	µm	Spot	Position	1		DAPI-	120
68956.4	41765.4	1.40298	µm	Spot	Position	1		DAPI-	121
68973.6	41771.1	1.34539	µm	Spot	Position	1		DAPI-	122
68977.8	41771.5	1.46577	µm	Spot	Position	1		DAPI-	123
68980.7	41771.6	1.45189	µm	Spot	Position	1		DAPI-	124
68956.9	41764.5	1.73266	µm	Spot	Position	1		DAPI-	125
68953.8	41767.2	1.73733	µm	Spot	Position	1		DAPI-	126
68956.7	41768.2	1.72971	µm	Spot	Position	1		DAPI-	127
68974.1	41770	1.78394	µm	Spot	Position	1		DAPI-	128
68951.9	41765.4	1.99676	µm	Spot	Position	1		DAPI-	129
68958.1	41766.3	1.88067	µm	Spot	Position	1		DAPI-	130
68959.2	41766.7	1.99487	µm	Spot	Position	1		DAPI-	131
68961.1	41766.7	1.95718	µm	Spot	Position	1		DAPI-	132
68954.1	41763.7	2.15148	µm	Spot	Position	1		DAPI-	135
68952.1	41764	2.15146	µm	Spot	Position	1		DAPI-	136
68957.8	41765.2	2.22222	µm	Spot	Position	1		DAPI-	137
68952.3	41766.4	2.29875	µm	Spot	Position	1		DAPI-	138
68954.7	41768.1	2.29795	µm	Spot	Position	1		DAPI-	139
68958.5	41768.4	2.32963	µm	Spot	Position	1		DAPI-	140
68984.7	41770.2	2.32857	µm	Spot	Position	1		DAPI-	142
68983.1	41770.4	2.21561	µm	Spot	Position	1		DAPI-	143
68984.3	41771.8	2.19941	µm	Spot	Position	1		DAPI-	145
69014.9	41772.6	1.73106	µm	Spot	Position	1		DAPI-	146
69008.4	41772.2	1.9407	µm	Spot	Position	1		DAPI-	147
69012.3	41773.5	2.05845	µm	Spot	Position	1		DAPI-	148
69012.9	41773	2.19719	µm	Spot	Position	1		DAPI-	149
68760.8	41818.9	1.55301	µm	Spot	Position	1		DAPI-	168
68753.1	41798.5	1.9563	µm	Spot	Position	1		DAPI-	171
68737.9	41818.1	1.88163	µm	Spot	Position	1		DAPI-	175
68806	41780.7	1.73965	µm	Spot	Position	1		DAPI-	186
68793.9	41783.5	1.75249	µm	Spot	Position	1		DAPI-	187
68770.8	41815.6	1.72175	µm	Spot	Position	1		DAPI-	192
68793.9	41786.3	1.92403	µm	Spot	Position	1		DAPI-	196
68791.8	41785.2	2.17992	µm	Spot	Position	1		DAPI-	202
68780.2	41806	2.19223	µm	Spot	Position	1		DAPI-	205
68996.1	41783	2.13082	µm	Spot	Position	1		DAPI-	211
69001.5	41774.9	1.39292	µm	Spot	Position	1		DAPI-	212
69007.8	41782.6	1.45196	µm	Spot	Position	1		DAPI-	215
69004	41776.6	1.72151	µm	Spot	Position	1		DAPI-	217
69028.1	41778.4	1.63347	µm	Spot	Position	1		DAPI-	218
68998.3	41784	1.60018	µm	Spot	Position	1		DAPI-	223
69000.1	41774.2	1.88137	µm	Spot	Position	1		DAPI-	224
69024.3	41776.3	1.95021	µm	Spot	Position	1		DAPI-	225
69016.1	41777.8	2.0361	µm	Spot	Position	1		DAPI-	226
69025.4	41780.5	2.07234	µm	Spot	Position	1		DAPI-	228
69003.8	41774.6	2.13559	µm	Spot	Position	1		DAPI-	233
69013.1	41781.2	2.25956	µm	Spot	Position	1		DAPI-	236
69035.4	41781.2	2.31393	µm	Spot	Position	1		DAPI-	237
68997.7	41785.1	2.12152	µm	Spot	Position	1		DAPI-	239
68998.1	41786.1	2.16076	µm	Spot	Position	1		DAPI-	241
69037.2	41786.7	2.15999	µm	Spot	Position	1		DAPI-	242
69076.8	41786.1	1.30924	µm	Spot	Position	1		DAPI-	244
69081	41780.3	1.53315	µm	Spot	Position	1		DAPI-	246
69082.5	41779.2	1.92816	µm	Spot	Position	1		DAPI-	250
69044.6	41781.7	2.04663	µm	Spot	Position	1		DAPI-	253
69059.3	41786.1	1.91731	µm	Spot	Position	1		DAPI-	257
69061.1	41778.8	2.28947	µm	Spot	Position	1		DAPI-	260
69083.4	41779.2	2.16	µm	Spot	Position	1		DAPI-	263
69055.5	41779.9	2.36874	µm	Spot	Position	1		DAPI-	264
69127.8	41784.7	1.78609	µm	Spot	Position	1		DAPI-	273
69167.6	41782.7	2.38239	µm	Spot	Position	1		DAPI-	281
69148	41793.4	2.24539	µm	Spot	Position	1		DAPI-	286
69377.6	41774.2	2.21899	µm	Spot	Position	1		DAPI-	316
68704.5	41838.1	2.31399	µm	Spot	Position	1		DAPI-	332
68750.4	41829.7	1.20394	µm	Spot	Position	1		DAPI-	335
68664.1	41873.3	1.3766	µm	Spot	Position	1		DAPI-	338
68666.7	41897	1.56306	µm	Spot	Position	1		DAPI-	358
69521.2	41714.3	2.57409	µm	Spot	Position	1		DAPI-	396
69523.1	41715.4	2.5694	µm	Spot	Position	1		DAPI-	397
69520.2	41715.8	2.54587	µm	Spot	Position	1		DAPI-	398
69515.9	41718.4	2.64984	µm	Spot	Position	1		DAPI-	399
69537.5	41713.9	2.77996	µm	Spot	Position	1		DAPI-	404
68855	41759.1	2.63933	µm	Spot	Position	1		DAPI-	426
68852.8	41759.5	2.56746	µm	Spot	Position	1		DAPI-	427
68857	41759.6	2.51327	µm	Spot	Position	1		DAPI-	428
68822.5	41766.5	2.86041	µm	Spot	Position	1		DAPI-	432
68817.8	41769.4	2.87211	µm	Spot	Position	1		DAPI-	433
68851.5	41771.2	2.8286	µm	Spot	Position	1		DAPI-	434
68829.3	41764.7	3.22492	µm	Spot	Position	1		DAPI-	436
68840.1	41768.4	3.05689	µm	Spot	Position	1		DAPI-	437
68933.7	41761	2.43746	µm	Spot	Position	1		DAPI-	449
68938.5	41762.2	2.4614	µm	Spot	Position	1		DAPI-	450
68949.8	41763.2	2.49334	µm	Spot	Position	1		DAPI-	451
68907.3	41764.8	2.77769	µm	Spot	Position	1		DAPI-	455
68939.4	41765.2	2.8884	µm	Spot	Position	1		DAPI-	456
68927.9	41756.9	3.18483	µm	Spot	Position	1		DAPI-	458
68936	41760.5	3.12341	µm	Spot	Position	1		DAPI-	459
68932.8	41758.8	3.38414	µm	Spot	Position	1		DAPI-	463
68959.1	41766	2.48222	µm	Spot	Position	1		DAPI-	469
68955.7	41769.3	2.68409	µm	Spot	Position	1		DAPI-	470
68986.8	41767.3	2.81312	µm	Spot	Position	1		DAPI-	473
68962.9	41767.3	3.15464	µm	Spot	Position	1		DAPI-	476
68962.9	41768.1	3.03262	µm	Spot	Position	1		DAPI-	477
68989.3	41771.8	3.00687	µm	Spot	Position	1		DAPI-	480
68990.8	41772	3.2824	µm	Spot	Position	1		DAPI-	482
68997.2	41772.3	3.23634	µm	Spot	Position	1		DAPI-	483
68965.5	41765.7	3.44747	µm	Spot	Position	1		DAPI-	484
68986.1	41768.8	3.5018	µm	Spot	Position	1		DAPI-	485
68956.8	41770.4	3.47832	µm	Spot	Position	1		DAPI-	487
69003.8	41773.1	2.49012	µm	Spot	Position	1		DAPI-	488
69002.4	41773.2	2.54646	µm	Spot	Position	1		DAPI-	489
69000	41771.9	3.1975	µm	Spot	Position	1		DAPI-	490
69002.3	41771.8	3.27376	µm	Spot	Position	1		DAPI-	491
69012.9	41772.2	3.58111	µm	Spot	Position	1		DAPI-	492
69376.9	41773	2.53766	µm	Spot	Position	1		DAPI-	494
69393	41768.1	2.74812	µm	Spot	Position	1		DAPI-	496
69394	41768.7	2.91154	µm	Spot	Position	1		DAPI-	497
69394.6	41767	3.05739	µm	Spot	Position	1		DAPI-	500
69395.1	41769.3	3.17321	µm	Spot	Position	1		DAPI-	501
69394.1	41770.6	3.14367	µm	Spot	Position	1		DAPI-	502
69393.3	41766.3	3.45245	µm	Spot	Position	1		DAPI-	508
69426.1	41753.9	2.48289	µm	Spot	Position	1		DAPI-	511
69428.7	41754.7	2.62906	µm	Spot	Position	1		DAPI-	512
69434.1	41747.3	2.83777	µm	Spot	Position	1		DAPI-	515
69426.1	41752	2.8676	µm	Spot	Position	1		DAPI-	516
69428.3	41753.8	2.97707	µm	Spot	Position	1		DAPI-	517
69425	41754.9	2.77456	µm	Spot	Position	1		DAPI-	518
69437	41754.9	2.96045	µm	Spot	Position	1		DAPI-	519
69430.7	41755.2	2.90332	µm	Spot	Position	1		DAPI-	520
69425.6	41756.5	2.82425	µm	Spot	Position	1		DAPI-	521
69436.5	41748.2	3.1538	µm	Spot	Position	1		DAPI-	523
69434.6	41750	3.18215	µm	Spot	Position	1		DAPI-	524
69424.1	41752.5	3.11862	µm	Spot	Position	1		DAPI-	526
69428.6	41752.6	3.25274	µm	Spot	Position	1		DAPI-	527
69424.8	41756.8	3.22291	µm	Spot	Position	1		DAPI-	529
69434.8	41757.4	3.28898	µm	Spot	Position	1		DAPI-	532
69424.1	41755.5	3.49917	µm	Spot	Position	1		DAPI-	533
69426	41757.1	3.44118	µm	Spot	Position	1		DAPI-	534
69474.7	41738.5	2.53302	µm	Spot	Position	1		DAPI-	538
69459.6	41739.2	2.96758	µm	Spot	Position	1		DAPI-	540
69462.2	41740.6	3.14628	µm	Spot	Position	1		DAPI-	545
69484.4	41728.1	3.52791	µm	Spot	Position	1		DAPI-	546
69494.7	41730.4	3.57916	µm	Spot	Position	1		DAPI-	547
69461.7	41736.2	3.3631	µm	Spot	Position	1		DAPI-	549
69460	41737.2	3.55151	µm	Spot	Position	1		DAPI-	551
69472.4	41737.8	3.48161	µm	Spot	Position	1		DAPI-	553
69459.1	41738.1	3.36481	µm	Spot	Position	1		DAPI-	555
68756.5	41797.4	3.48835	µm	Spot	Position	1		DAPI-	574
68800.6	41779.6	2.60553	µm	Spot	Position	1		DAPI-	578
68808.8	41779.9	2.46165	µm	Spot	Position	1		DAPI-	579
68802	41774.8	2.82872	µm	Spot	Position	1		DAPI-	583
68809.3	41778.5	2.78419	µm	Spot	Position	1		DAPI-	586
68798.1	41781.1	2.94577	µm	Spot	Position	1		DAPI-	587
68780	41794	2.73347	µm	Spot	Position	1		DAPI-	590
68795.5	41798.9	2.91652	µm	Spot	Position	1		DAPI-	593
68773.4	41814.5	2.89887	µm	Spot	Position	1		DAPI-	595
68998.9	41774.6	2.60921	µm	Spot	Position	1		DAPI-	613
69027.5	41777.9	2.55521	µm	Spot	Position	1		DAPI-	614
69014.4	41779.5	2.46117	µm	Spot	Position	1		DAPI-	615
69029.8	41781.3	2.59307	µm	Spot	Position	1		DAPI-	616
69008.5	41784.3	2.52622	µm	Spot	Position	1		DAPI-	617
69000	41787.7	2.65853	µm	Spot	Position	1		DAPI-	618
69017.1	41773.9	2.83111	µm	Spot	Position	1		DAPI-	619
69017.6	41775.7	2.77024	µm	Spot	Position	1		DAPI-	620
69018.1	41776.3	2.86943	µm	Spot	Position	1		DAPI-	621
69017.2	41777.1	2.73433	µm	Spot	Position	1		DAPI-	622
69027.5	41777.2	2.77482	µm	Spot	Position	1		DAPI-	623
69029.6	41777.3	2.77538	µm	Spot	Position	1		DAPI-	624
69031.7	41777.7	2.91609	µm	Spot	Position	1		DAPI-	625
69024.5	41779.6	2.8257	µm	Spot	Position	1		DAPI-	627
69021.6	41782.4	2.77462	µm	Spot	Position	1		DAPI-	629
69015.9	41783.1	2.96144	µm	Spot	Position	1		DAPI-	630
69020.3	41783.1	2.97924	µm	Spot	Position	1		DAPI-	631
69022	41777.2	3.17636	µm	Spot	Position	1		DAPI-	635
69026.6	41778	3.18392	µm	Spot	Position	1		DAPI-	636
69015.5	41783.9	3.10873	µm	Spot	Position	1		DAPI-	640
69027.5	41776.5	3.53814	µm	Spot	Position	1		DAPI-	641
69032.8	41781.4	3.36769	µm	Spot	Position	1		DAPI-	642
69061.4	41777.5	2.61234	µm	Spot	Position	1		DAPI-	643
69056.5	41779.4	2.43508	µm	Spot	Position	1		DAPI-	644
69079.5	41781.2	2.64643	µm	Spot	Position	1		DAPI-	646
69089.4	41786.8	2.54647	µm	Spot	Position	1		DAPI-	651
69073.5	41777.4	2.75791	µm	Spot	Position	1		DAPI-	652
69077.9	41777.8	2.75499	µm	Spot	Position	1		DAPI-	654
69067.1	41779.8	2.776	µm	Spot	Position	1		DAPI-	655
69089	41788.3	2.82069	µm	Spot	Position	1		DAPI-	661
69065.6	41776.8	3.19313	µm	Spot	Position	1		DAPI-	662
69059.4	41776.8	3.45521	µm	Spot	Position	1		DAPI-	665
69074.1	41777	3.38574	µm	Spot	Position	1		DAPI-	666
69124.7	41781.8	2.46461	µm	Spot	Position	1		DAPI-	669
69130.2	41781.7	2.61463	µm	Spot	Position	1		DAPI-	670
69135.2	41785	2.67647	µm	Spot	Position	1		DAPI-	673
69122.3	41785.8	2.51394	µm	Spot	Position	1		DAPI-	674
69121.2	41787	2.56705	µm	Spot	Position	1		DAPI-	676
69127.4	41781.6	2.74699	µm	Spot	Position	1		DAPI-	679
69111.9	41790.4	2.95226	µm	Spot	Position	1		DAPI-	680
69132	41790.3	2.83648	µm	Spot	Position	1		DAPI-	681
69125	41781.5	3.2234	µm	Spot	Position	1		DAPI-	682
69115.5	41787.3	3.29871	µm	Spot	Position	1		DAPI-	685
69177.4	41782.7	2.48644	µm	Spot	Position	1		DAPI-	697
69162.2	41790.3	2.62388	µm	Spot	Position	1		DAPI-	700
69177.7	41781.6	2.77661	µm	Spot	Position	1		DAPI-	703
69175.5	41784.5	2.73107	µm	Spot	Position	1		DAPI-	704
69143	41787.4	2.94994	µm	Spot	Position	1		DAPI-	705
69170.7	41788.1	2.85778	µm	Spot	Position	1		DAPI-	706
69154	41788.9	2.74573	µm	Spot	Position	1		DAPI-	707
69165.9	41788.8	2.71838	µm	Spot	Position	1		DAPI-	708
69165.4	41789.8	2.90022	µm	Spot	Position	1		DAPI-	710
69150.3	41792.4	2.98732	µm	Spot	Position	1		DAPI-	712
69178.7	41784.4	3.03668	µm	Spot	Position	1		DAPI-	715
69174.5	41785.2	3.13316	µm	Spot	Position	1		DAPI-	716
69145.8	41788.2	3.03684	µm	Spot	Position	1		DAPI-	718
69155.1	41789	3.09161	µm	Spot	Position	1		DAPI-	720
69166.7	41782.3	3.41088	µm	Spot	Position	1		DAPI-	727
69178	41783	3.31654	µm	Spot	Position	1		DAPI-	728
69165	41783.6	3.50214	µm	Spot	Position	1		DAPI-	730
69174.8	41786.2	3.49102	µm	Spot	Position	1		DAPI-	732
69142.2	41786.6	3.45701	µm	Spot	Position	1		DAPI-	733
69147.2	41791.1	3.38603	µm	Spot	Position	1		DAPI-	736
69192.6	41783.9	2.76585	µm	Spot	Position	1		DAPI-	752
69208.7	41792.8	2.79719	µm	Spot	Position	1		DAPI-	758
69210.1	41794.9	3.25061	µm	Spot	Position	1		DAPI-	776
69207	41793.4	3.55542	µm	Spot	Position	1		DAPI-	788
69213.3	41794.4	3.49944	µm	Spot	Position	1		DAPI-	790
69236.1	41797.3	2.658	µm	Spot	Position	1		DAPI-	794
69258.5	41810.1	2.54062	µm	Spot	Position	1		DAPI-	796
69232.5	41803.6	3.51482	µm	Spot	Position	1		DAPI-	819
69301.6	41802.2	2.91278	µm	Spot	Position	1		DAPI-	827
69302.3	41799.3	3.25105	µm	Spot	Position	1		DAPI-	830
69301	41803.1	3.4891	µm	Spot	Position	1		DAPI-	834
69360.4	41779.2	2.60448	µm	Spot	Position	1		DAPI-	844
69336.1	41780.9	2.51999	µm	Spot	Position	1		DAPI-	845
69361.4	41778.8	2.88471	µm	Spot	Position	1		DAPI-	849
69359.2	41775	3.07488	µm	Spot	Position	1		DAPI-	853
69339.9	41780.3	3.52383	µm	Spot	Position	1		DAPI-	858
69350.8	41788.2	3.40431	µm	Spot	Position	1		DAPI-	861
69372.7	41774.5	2.58875	µm	Spot	Position	1		DAPI-	864
69379.7	41777.4	2.46155	µm	Spot	Position	1		DAPI-	866
69382.4	41782.2	2.49023	µm	Spot	Position	1		DAPI-	871
69370.4	41777.7	3.47341	µm	Spot	Position	1		DAPI-	882
68661.1	41857.9	2.80613	µm	Spot	Position	1		DAPI-	891
68682.4	41861	2.8972	µm	Spot	Position	1		DAPI-	901
68684.6	41862	2.77722	µm	Spot	Position	1		DAPI-	902
68678.6	41843.3	3.27807	µm	Spot	Position	1		DAPI-	904
68737.4	41838.1	2.8607	µm	Spot	Position	1		DAPI-	907
68669.7	41897.5	2.97813	µm	Spot	Position	1		DAPI-	937
69480.1	41722.2	4.01418	µm	Spot	Position	1		DAPI-	955
69484.3	41716.1	4.64451	µm	Spot	Position	1		DAPI-	958
69486.3	41717.3	4.6448	µm	Spot	Position	1		DAPI-	959
69483.4	41717.6	4.77902	µm	Spot	Position	1		DAPI-	960
69523.5	41714	3.63055	µm	Spot	Position	1		DAPI-	967
69564.4	41699.7	4.20245	µm	Spot	Position	1		DAPI-	999
68807.9	41772.9	4.06358	µm	Spot	Position	1		DAPI-	1003
68850.5	41771.6	3.67025	µm	Spot	Position	1		DAPI-	1006
68903.6	41767.5	3.60862	µm	Spot	Position	1		DAPI-	1012
68883.6	41770.9	4.45526	µm	Spot	Position	1		DAPI-	1018
68921	41755.1	4.11327	µm	Spot	Position	1		DAPI-	1021
68945.6	41763.1	4.08762	µm	Spot	Position	1		DAPI-	1023
68932.9	41758.2	4.27517	µm	Spot	Position	1		DAPI-	1027
68940.7	41766.5	4.72924	µm	Spot	Position	1		DAPI-	1032
69364.1	41773.6	4.09261	µm	Spot	Position	1		DAPI-	1043
69392	41766.7	3.67822	µm	Spot	Position	1		DAPI-	1047
69409.9	41762	3.96122	µm	Spot	Position	1		DAPI-	1049
69379.3	41770.8	3.97534	µm	Spot	Position	1		DAPI-	1050
69409.6	41763.8	4.42016	µm	Spot	Position	1		DAPI-	1053
69454.3	41742.8	3.74095	µm	Spot	Position	1		DAPI-	1058
69442.2	41746.4	3.69454	µm	Spot	Position	1		DAPI-	1059
69432.8	41752.9	3.76131	µm	Spot	Position	1		DAPI-	1060
69437.5	41756.4	3.65888	µm	Spot	Position	1		DAPI-	1062
69452.6	41739.9	3.99887	µm	Spot	Position	1		DAPI-	1065
69451.4	41744.2	4.18943	µm	Spot	Position	1		DAPI-	1067
69416.5	41761.9	4.18067	µm	Spot	Position	1		DAPI-	1072
69445.5	41745.7	4.39268	µm	Spot	Position	1		DAPI-	1073
69440.9	41749.7	4.27913	µm	Spot	Position	1		DAPI-	1076
69432.8	41750.5	4.36693	µm	Spot	Position	1		DAPI-	1077
69444.9	41753.4	4.44918	µm	Spot	Position	1		DAPI-	1079
69414.5	41762.5	4.38306	µm	Spot	Position	1		DAPI-	1080
69455	41739.2	4.57411	µm	Spot	Position	1		DAPI-	1081
69451.2	41740.7	4.7117	µm	Spot	Position	1		DAPI-	1082
69453.6	41744.7	4.56767	µm	Spot	Position	1		DAPI-	1083
69437	41757.5	4.64971	µm	Spot	Position	1		DAPI-	1086
69435.3	41758.6	4.63643	µm	Spot	Position	1		DAPI-	1087
69432.2	41759.2	4.65728	µm	Spot	Position	1		DAPI-	1088
69464.4	41735.4	3.69972	µm	Spot	Position	1		DAPI-	1091
69463.5	41742	3.61546	µm	Spot	Position	1		DAPI-	1093
69493.8	41732.9	4.49083	µm	Spot	Position	1		DAPI-	1099
69462.6	41734.3	4.5899	µm	Spot	Position	1		DAPI-	1106
68755.3	41797.3	4.09836	µm	Spot	Position	1		DAPI-	1115
68751.7	41800	4.68365	µm	Spot	Position	1		DAPI-	1128
68809.1	41774.2	4.44307	µm	Spot	Position	1		DAPI-	1143
68798.3	41779.9	4.74076	µm	Spot	Position	1		DAPI-	1147
68796.2	41782.8	4.68974	µm	Spot	Position	1		DAPI-	1149
68967.8	41778.6	3.63515	µm	Spot	Position	1		DAPI-	1157
68965.1	41774.3	4.22455	µm	Spot	Position	1		DAPI-	1158
69016.1	41785	3.75052	µm	Spot	Position	1		DAPI-	1166
68998.8	41788.5	4.5607	µm	Spot	Position	1		DAPI-	1171
69059.1	41779.5	3.67724	µm	Spot	Position	1		DAPI-	1172
69062.6	41777.6	4.41777	µm	Spot	Position	1		DAPI-	1176
69076.3	41775.3	4.62973	µm	Spot	Position	1		DAPI-	1178
69090.5	41778.9	4.03098	µm	Spot	Position	1		DAPI-	1181
69092.8	41784.1	4.23114	µm	Spot	Position	1		DAPI-	1183
69134.4	41784.6	4.34753	µm	Spot	Position	1		DAPI-	1184
69171.7	41786.2	3.70054	µm	Spot	Position	1		DAPI-	1194
69151.7	41791.5	3.87257	µm	Spot	Position	1		DAPI-	1201
69148	41784.1	3.98852	µm	Spot	Position	1		DAPI-	1207
69151.2	41787.6	3.984	µm	Spot	Position	1		DAPI-	1208
69169.1	41795.6	4.17785	µm	Spot	Position	1		DAPI-	1213
69161	41783	4.35122	µm	Spot	Position	1		DAPI-	1215
69158.9	41785.9	4.23847	µm	Spot	Position	1		DAPI-	1217
69172.6	41786.8	4.38373	µm	Spot	Position	1		DAPI-	1218
69147.9	41787.3	4.6276	µm	Spot	Position	1		DAPI-	1227
69217.1	41786.2	3.86331	µm	Spot	Position	1		DAPI-	1238
69217.8	41790.1	3.88964	µm	Spot	Position	1		DAPI-	1244
69203.8	41786.3	4.01053	µm	Spot	Position	1		DAPI-	1257
69214.4	41797.7	3.97778	µm	Spot	Position	1		DAPI-	1266
69218.6	41789.9	4.38984	µm	Spot	Position	1		DAPI-	1270
69213.4	41797.9	4.32252	µm	Spot	Position	1		DAPI-	1276
69216.1	41798.3	4.33953	µm	Spot	Position	1		DAPI-	1277
69217.6	41788.1	4.53654	µm	Spot	Position	1		DAPI-	1279
69214	41798.3	4.73092	µm	Spot	Position	1		DAPI-	1284
69238.6	41797.6	3.66232	µm	Spot	Position	1		DAPI-	1290
69245.5	41798.8	4.10476	µm	Spot	Position	1		DAPI-	1299
69233.1	41804.5	4.06265	µm	Spot	Position	1		DAPI-	1302
69249.2	41802.5	4.22658	µm	Spot	Position	1		DAPI-	1305
69252.4	41800.9	4.70173	µm	Spot	Position	1		DAPI-	1309
69255.3	41801.3	4.75267	µm	Spot	Position	1		DAPI-	1310
69246.8	41803	4.65381	µm	Spot	Position	1		DAPI-	1314
69247.7	41803.6	4.69425	µm	Spot	Position	1		DAPI-	1316
69301.1	41800.3	3.80784	µm	Spot	Position	1		DAPI-	1320
69288.8	41803.4	3.80568	µm	Spot	Position	1		DAPI-	1322
69290.3	41806.2	3.71828	µm	Spot	Position	1		DAPI-	1326
69293.1	41801.1	3.99945	µm	Spot	Position	1		DAPI-	1332
69294.3	41802.2	3.95355	µm	Spot	Position	1		DAPI-	1333
69297.6	41807.8	4.01136	µm	Spot	Position	1		DAPI-	1336
69288.4	41802.9	4.36817	µm	Spot	Position	1		DAPI-	1341
69286.9	41803.1	4.29055	µm	Spot	Position	1		DAPI-	1342
69277.7	41796.6	4.78597	µm	Spot	Position	1		DAPI-	1344
69301.9	41796.8	4.76564	µm	Spot	Position	1		DAPI-	1345
69333.9	41778	3.72294	µm	Spot	Position	1		DAPI-	1351
69360.7	41775.5	4.1031	µm	Spot	Position	1		DAPI-	1353
69360.6	41777.3	4.11073	µm	Spot	Position	1		DAPI-	1354
69326.7	41778	4.05967	µm	Spot	Position	1		DAPI-	1355
69339.3	41778.3	4.19487	µm	Spot	Position	1		DAPI-	1356
69328.5	41777.7	4.40153	µm	Spot	Position	1		DAPI-	1364
69328.5	41784.4	4.38695	µm	Spot	Position	1		DAPI-	1366
69325.2	41786	4.28378	µm	Spot	Position	1		DAPI-	1367
69361.3	41773.9	4.53348	µm	Spot	Position	1		DAPI-	1372
69326.3	41779.2	4.68717	µm	Spot	Position	1		DAPI-	1373
69367.6	41774.1	3.65155	µm	Spot	Position	1		DAPI-	1380
69382.1	41783.6	3.75903	µm	Spot	Position	1		DAPI-	1384
69369.1	41775.1	3.92842	µm	Spot	Position	1		DAPI-	1385
68672.8	41844.5	3.72929	µm	Spot	Position	1		DAPI-	1394
68674.4	41843.6	3.75505	µm	Spot	Position	1		DAPI-	1404
68675.4	41843.4	4.12467	µm	Spot	Position	1		DAPI-	1408
68670	41876.8	4.23391	µm	Spot	Position	1		DAPI-	1435
69481.8	41716.9	5.53653	µm	Spot	Position	1		DAPI-	1467
69580.5	41687.1	5.48932	µm	Spot	Position	1		DAPI-	1488
68851.7	41773.1	5.36862	µm	Spot	Position	1		DAPI-	1494
68899.3	41770.4	5.96111	µm	Spot	Position	1		DAPI-	1502
68897.3	41770.5	5.9243	µm	Spot	Position	1		DAPI-	1503
68922.4	41755.9	5.37674	µm	Spot	Position	1		DAPI-	1504
69409.2	41764.7	4.95415	µm	Spot	Position	1		DAPI-	1516
69381	41769	5.01317	µm	Spot	Position	1		DAPI-	1517
69443.1	41745.3	5.07689	µm	Spot	Position	1		DAPI-	1525
69439.8	41747.3	4.97867	µm	Spot	Position	1		DAPI-	1526
69431.4	41753.4	5.20428	µm	Spot	Position	1		DAPI-	1530
69416.7	41763.2	5.39943	µm	Spot	Position	1		DAPI-	1532
69456.9	41733.7	5.59067	µm	Spot	Position	1		DAPI-	1533
69457.6	41734.5	5.67269	µm	Spot	Position	1		DAPI-	1534
69448.3	41742.7	5.9882	µm	Spot	Position	1		DAPI-	1536
69464.2	41742.6	5.85986	µm	Spot	Position	1		DAPI-	1549
69466	41743.7	5.87845	µm	Spot	Position	1		DAPI-	1550
68796.7	41778.1	4.80451	µm	Spot	Position	1		DAPI-	1555
68803.3	41797.5	5.87315	µm	Spot	Position	1		DAPI-	1566
68996.1	41787.1	5.09496	µm	Spot	Position	1		DAPI-	1572
68996.8	41788.3	5.256	µm	Spot	Position	1		DAPI-	1574
69019.1	41777	4.95644	µm	Spot	Position	1		DAPI-	1575
69024.6	41788.2	5.95719	µm	Spot	Position	1		DAPI-	1578
69062.8	41777.6	5.16669	µm	Spot	Position	1		DAPI-	1581
69068.3	41778.4	5.38066	µm	Spot	Position	1		DAPI-	1582
69079.1	41774.8	5.80023	µm	Spot	Position	1		DAPI-	1584
69072.2	41776.9	5.88393	µm	Spot	Position	1		DAPI-	1585
69108	41778.6	4.94911	µm	Spot	Position	1		DAPI-	1588
69109.9	41776.8	5.76051	µm	Spot	Position	1		DAPI-	1595
69160.1	41784.3	4.98099	µm	Spot	Position	1		DAPI-	1599
69146.3	41784.8	5.08453	µm	Spot	Position	1		DAPI-	1600
69152.8	41792.1	4.85764	µm	Spot	Position	1		DAPI-	1601
69180.6	41795.3	5.28762	µm	Spot	Position	1		DAPI-	1604
69255.7	41800.7	5.604	µm	Spot	Position	1		DAPI-	1647
69233.4	41806.5	5.98192	µm	Spot	Position	1		DAPI-	1657
69278.4	41798.6	5.00047	µm	Spot	Position	1		DAPI-	1658
69303.2	41796.1	5.26768	µm	Spot	Position	1		DAPI-	1664
69290.7	41801.8	5.25081	µm	Spot	Position	1		DAPI-	1665
69299.9	41798.1	5.64777	µm	Spot	Position	1		DAPI-	1671
69298.8	41798.9	5.61692	µm	Spot	Position	1		DAPI-	1673
69292.2	41799.7	5.80031	µm	Spot	Position	1		DAPI-	1680
69339.2	41777.8	4.84439	µm	Spot	Position	1		DAPI-	1683
69334.7	41796	4.88652	µm	Spot	Position	1		DAPI-	1687
69327.4	41776.4	5.37464	µm	Spot	Position	1		DAPI-	1688
69341.3	41777.3	5.18149	µm	Spot	Position	1		DAPI-	1689
69342.1	41778.9	5.63298	µm	Spot	Position	1		DAPI-	1699
68674.5	41845.8	4.86137	µm	Spot	Position	1		DAPI-	1730
68670.8	41880.1	5.78828	µm	Spot	Position	1		DAPI-	1749
69479.1	41721.2	6.28038	µm	Spot	Position	1		DAPI-	1775
69487.8	41715.8	6.99634	µm	Spot	Position	1		DAPI-	1780
69487.4	41716.8	7.00726	µm	Spot	Position	1		DAPI-	1781
68932.1	41756.3	6.25114	µm	Spot	Position	1		DAPI-	1814
68944	41772.9	6.6996	µm	Spot	Position	1		DAPI-	1818
69406.8	41766	6.80504	µm	Spot	Position	1		DAPI-	1833
69455.5	41737.7	6.28921	µm	Spot	Position	1		DAPI-	1834
69431.4	41749.1	6.20689	µm	Spot	Position	1		DAPI-	1836
69496.5	41736.3	6.98009	µm	Spot	Position	1		DAPI-	1849
68753.1	41798.9	6.63388	µm	Spot	Position	1		DAPI-	1853
69111.1	41779.8	6.87216	µm	Spot	Position	1		DAPI-	1881
69128.8	41780.2	6.84935	µm	Spot	Position	1		DAPI-	1882
69182	41798.5	6.57531	µm	Spot	Position	1		DAPI-	1896
69221.8	41801.8	6.37159	µm	Spot	Position	1		DAPI-	1897
69186.7	41797.4	6.64624	µm	Spot	Position	1		DAPI-	1905
69187.5	41797.8	7.01701	µm	Spot	Position	1		DAPI-	1906
69229.1	41793.5	6.51856	µm	Spot	Position	1		DAPI-	1913
69255.8	41800.2	6.4945	µm	Spot	Position	1		DAPI-	1915
69250	41799.9	6.70932	µm	Spot	Position	1		DAPI-	1921
69247.1	41797.6	6.90623	µm	Spot	Position	1		DAPI-	1925
69256.7	41799.6	6.95158	µm	Spot	Position	1		DAPI-	1926
69288.8	41799.1	6.09767	µm	Spot	Position	1		DAPI-	1929
69282.5	41798.7	6.72925	µm	Spot	Position	1		DAPI-	1936
69277.6	41799.1	6.72829	µm	Spot	Position	1		DAPI-	1937
69319.5	41804.5	6.60629	µm	Spot	Position	1		DAPI-	1938
69360	41798.1	6.14228	µm	Spot	Position	1		DAPI-	1943
69341.5	41795.3	6.59115	µm	Spot	Position	1		DAPI-	1947
69330.5	41797.2	6.58943	µm	Spot	Position	1		DAPI-	1948
69331.7	41800.5	6.7174	µm	Spot	Position	1		DAPI-	1957
69328	41794.8	6.96916	µm	Spot	Position	1		DAPI-	1960
69358.3	41803.8	7.01915	µm	Spot	Position	1		DAPI-	1963
69372	41793.8	6.23849	µm	Spot	Position	1		DAPI-	1966
68695.6	41841.3	7.01983	µm	Spot	Position	1		DAPI-	1982
68681.1	41842.4	6.98823	µm	Spot	Position	1		DAPI-	1983
68721	41849.1	6.08531	µm	Spot	Position	1		DAPI-	1989
69500.5	41721.8	7.37534	µm	Spot	Position	1		DAPI-	2024
69482.8	41715.7	8.33865	µm	Spot	Position	1		DAPI-	2026
68905.4	41769.2	8.0736	µm	Spot	Position	1		DAPI-	2045
69362.3	41772.4	7.37318	µm	Spot	Position	1		DAPI-	2047
69455.8	41734.2	7.44997	µm	Spot	Position	1		DAPI-	2050
69069.2	41792.1	8.03864	µm	Spot	Position	1		DAPI-	2071
69099.3	41777.4	7.52087	µm	Spot	Position	1		DAPI-	2075
69107.4	41776.7	7.92723	µm	Spot	Position	1		DAPI-	2079
69100.2	41777.6	7.81391	µm	Spot	Position	1		DAPI-	2080
69110.9	41783.7	7.82329	µm	Spot	Position	1		DAPI-	2081
69111.3	41786.2	7.96295	µm	Spot	Position	1		DAPI-	2082
69118.9	41786.9	8.13346	µm	Spot	Position	1		DAPI-	2085
69221.1	41803.6	7.93509	µm	Spot	Position	1		DAPI-	2092
69251.1	41798.7	7.45672	µm	Spot	Position	1		DAPI-	2096
69228.6	41793.3	7.76041	µm	Spot	Position	1		DAPI-	2099
69249.2	41797.5	7.67397	µm	Spot	Position	1		DAPI-	2101
69246.7	41795.3	7.95954	µm	Spot	Position	1		DAPI-	2106
69308.2	41791.6	7.47225	µm	Spot	Position	1		DAPI-	2109
69305.2	41793.4	7.52877	µm	Spot	Position	1		DAPI-	2113
69281.1	41799.1	7.70993	µm	Spot	Position	1		DAPI-	2115
69278.1	41796.8	8.23913	µm	Spot	Position	1		DAPI-	2117
69329.9	41795.7	7.56446	µm	Spot	Position	1		DAPI-	2122
68668.9	41887.3	7.56905	µm	Spot	Position	1		DAPI-	2141
69485.9	41717.5	8.66458	µm	Spot	Position	1		DAPI-	2162
69487	41715.8	8.81545	µm	Spot	Position	1		DAPI-	2164
69489	41719.2	8.84732	µm	Spot	Position	1		DAPI-	2165
68928.5	41773.3	8.5337	µm	Spot	Position	1		DAPI-	2178
68947.5	41773.6	8.54299	µm	Spot	Position	1		DAPI-	2179
68896.8	41756.6	0.1501	µm	Spot	Position	1	S100B+	DAPI+	8
68879.7	41762.5	0.1501	µm	Spot	Position	1	S100B+	DAPI+	12
68884.1	41763.4	0.1501	µm	Spot	Position	1	S100B+	DAPI+	14
68874	41767	0.1501	µm	Spot	Position	1	S100B+	DAPI+	17
68878.7	41767.5	0.1501	µm	Spot	Position	1	S100B+	DAPI+	18
68876.1	41768.6	0.1501	µm	Spot	Position	1	S100B+	DAPI+	19
68864.2	41765.9	0.402413	µm	Spot	Position	1	S100B+	DAPI+	21
68912	41762.6	0.975081	µm	Spot	Position	1	S100B+	DAPI+	33
69065.3	41786.7	1.11055	µm	Spot	Position	1	S100B+	DAPI+	42
68663.4	41870.3	0.747912	µm	Spot	Position	1	S100B+	DAPI+	53
68664.6	41871.3	0.758592	µm	Spot	Position	1	S100B+	DAPI+	54
68848.5	41762.4	2.05873	µm	Spot	Position	1	S100B+	DAPI+	75
68835.1	41771.8	1.91509	µm	Spot	Position	1	S100B+	DAPI+	78
68846.2	41766.4	2.28485	µm	Spot	Position	1	S100B+	DAPI+	85
68892	41766	1.48975	µm	Spot	Position	1	S100B+	DAPI+	89
68887.2	41764.2	1.66913	µm	Spot	Position	1	S100B+	DAPI+	92
68880.3	41765.5	1.70904	µm	Spot	Position	1	S100B+	DAPI+	93
68885.8	41766.5	1.77948	µm	Spot	Position	1	S100B+	DAPI+	94
68899.8	41761.8	1.96497	µm	Spot	Position	1	S100B+	DAPI+	96
68898.6	41762.6	1.98563	µm	Spot	Position	1	S100B+	DAPI+	97
68884.4	41763.5	1.80614	µm	Spot	Position	1	S100B+	DAPI+	98
68888.6	41765.8	2.06317	µm	Spot	Position	1	S100B+	DAPI+	99
68882.8	41768.3	2.02855	µm	Spot	Position	1	S100B+	DAPI+	100
68925.4	41764.5	2.20351	µm	Spot	Position	1	S100B+	DAPI+	117
68916.2	41765.2	2.3111	µm	Spot	Position	1	S100B+	DAPI+	119
68983.5	41769.4	2.28492	µm	Spot	Position	1	S100B+	DAPI+	141
68973.2	41771.5	2.32112	µm	Spot	Position	1	S100B+	DAPI+	144
68756.8	41809.3	1.89323	µm	Spot	Position	1	S100B+	DAPI+	172
68745.4	41813.4	2.13759	µm	Spot	Position	1	S100B+	DAPI+	180
68763	41818.1	2.16877	µm	Spot	Position	1	S100B+	DAPI+	181
68795.2	41801.5	1.55694	µm	Spot	Position	1	S100B+	DAPI+	190
68797.5	41795.7	2.0162	µm	Spot	Position	1	S100B+	DAPI+	200
68792.1	41800	2.05875	µm	Spot	Position	1	S100B+	DAPI+	201
68785.8	41805.3	2.27151	µm	Spot	Position	1	S100B+	DAPI+	204
68978.3	41774	1.38231	µm	Spot	Position	1	S100B+	DAPI+	208
69001.5	41780.3	1.73251	µm	Spot	Position	1	S100B+	DAPI+	220
69041.9	41785.9	1.97309	µm	Spot	Position	1	S100B+	DAPI+	232
69010.7	41777.6	2.18216	µm	Spot	Position	1	S100B+	DAPI+	234
68999.8	41780.9	2.28738	µm	Spot	Position	1	S100B+	DAPI+	235
69008.7	41781.6	2.3176	µm	Spot	Position	1	S100B+	DAPI+	238
69035.6	41785	2.37131	µm	Spot	Position	1	S100B+	DAPI+	240
69039.4	41787	2.29556	µm	Spot	Position	1	S100B+	DAPI+	243
69067.3	41784	1.96526	µm	Spot	Position	1	S100B+	DAPI+	254
69043.7	41785.1	1.92508	µm	Spot	Position	1	S100B+	DAPI+	255
69064.7	41785.3	1.85324	µm	Spot	Position	1	S100B+	DAPI+	256
69073.2	41786.4	1.98884	µm	Spot	Position	1	S100B+	DAPI+	258
69074.9	41788.2	1.95093	µm	Spot	Position	1	S100B+	DAPI+	259
69098.6	41785.6	2.34291	µm	Spot	Position	1	S100B+	DAPI+	276
69120.4	41789.1	2.31535	µm	Spot	Position	1	S100B+	DAPI+	278
68656.4	41853.9	1.79095	µm	Spot	Position	1	S100B+	DAPI+	319
68650.5	41861.5	1.9408	µm	Spot	Position	1	S100B+	DAPI+	322
68672.1	41862.4	2.32535	µm	Spot	Position	1	S100B+	DAPI+	327
68708.5	41837.7	1.85956	µm	Spot	Position	1	S100B+	DAPI+	331
68752.3	41828.8	1.41677	µm	Spot	Position	1	S100B+	DAPI+	334
68746.9	41829.8	2.39329	µm	Spot	Position	1	S100B+	DAPI+	336
68648.8	41879	1.35494	µm	Spot	Position	1	S100B+	DAPI+	340
68650.5	41879.5	1.31774	µm	Spot	Position	1	S100B+	DAPI+	341
68664.9	41894.3	1.2891	µm	Spot	Position	1	S100B+	DAPI+	344
68655.7	41869	1.72084	µm	Spot	Position	1	S100B+	DAPI+	347
68657.8	41871.4	1.58954	µm	Spot	Position	1	S100B+	DAPI+	349
68645.8	41882.9	1.61669	µm	Spot	Position	1	S100B+	DAPI+	356
68661	41871.6	1.81777	µm	Spot	Position	1	S100B+	DAPI+	362
68663.1	41875.4	2.01816	µm	Spot	Position	1	S100B+	DAPI+	363
68665.1	41876	1.85281	µm	Spot	Position	1	S100B+	DAPI+	364
68649.5	41885.7	1.84521	µm	Spot	Position	1	S100B+	DAPI+	366
68662.3	41898.2	1.94526	µm	Spot	Position	1	S100B+	DAPI+	369
68659.9	41867.2	2.36623	µm	Spot	Position	1	S100B+	DAPI+	370
68665.4	41868.7	2.17801	µm	Spot	Position	1	S100B+	DAPI+	371
68659.5	41869.2	2.2964	µm	Spot	Position	1	S100B+	DAPI+	372
68665.6	41873.3	2.33295	µm	Spot	Position	1	S100B+	DAPI+	374
68666.2	41876.4	2.25279	µm	Spot	Position	1	S100B+	DAPI+	377
68643.9	41876.7	2.33561	µm	Spot	Position	1	S100B+	DAPI+	378
69617.8	41675.4	3.51248	µm	Spot	Position	1	S100B+	DAPI+	388
69519.9	41717.9	2.7099	µm	Spot	Position	1	S100B+	DAPI+	406
69517.6	41718.4	2.82072	µm	Spot	Position	1	S100B+	DAPI+	408
69520.7	41719.3	3.18828	µm	Spot	Position	1	S100B+	DAPI+	414
69524	41716.1	3.43106	µm	Spot	Position	1	S100B+	DAPI+	420
69585.9	41693.9	3.55206	µm	Spot	Position	1	S100B+	DAPI+	424
68843.3	41766.6	2.52754	µm	Spot	Position	1	S100B+	DAPI+	430
68842.3	41768.4	3.04821	µm	Spot	Position	1	S100B+	DAPI+	438
68896.1	41760.2	2.59185	µm	Spot	Position	1	S100B+	DAPI+	440
68887.8	41768.7	2.61388	µm	Spot	Position	1	S100B+	DAPI+	441
68899.3	41760.1	2.88846	µm	Spot	Position	1	S100B+	DAPI+	442
68890.3	41762.7	3.19461	µm	Spot	Position	1	S100B+	DAPI+	443
68895.5	41764	3.46672	µm	Spot	Position	1	S100B+	DAPI+	445
68903.8	41765.9	3.41539	µm	Spot	Position	1	S100B+	DAPI+	446
68892.5	41767.6	3.34795	µm	Spot	Position	1	S100B+	DAPI+	447
68942.6	41763.8	2.55197	µm	Spot	Position	1	S100B+	DAPI+	452
68912.4	41764.7	2.40852	µm	Spot	Position	1	S100B+	DAPI+	453
68932.3	41761.5	2.86338	µm	Spot	Position	1	S100B+	DAPI+	454
68922.6	41767	3.27223	µm	Spot	Position	1	S100B+	DAPI+	460
68948.4	41767	3.10225	µm	Spot	Position	1	S100B+	DAPI+	461
68917.8	41767.2	3.39277	µm	Spot	Position	1	S100B+	DAPI+	465
68946.9	41769	3.43656	µm	Spot	Position	1	S100B+	DAPI+	466
68978.5	41769.7	3.09165	µm	Spot	Position	1	S100B+	DAPI+	478
68972.6	41771.8	3.15662	µm	Spot	Position	1	S100B+	DAPI+	479
69469.3	41737.1	3.34882	µm	Spot	Position	1	S100B+	DAPI+	550
68766.3	41793.3	2.48804	µm	Spot	Position	1	S100B+	DAPI+	558
68758.7	41798.8	2.49328	µm	Spot	Position	1	S100B+	DAPI+	559
68757.4	41795.1	3.51998	µm	Spot	Position	1	S100B+	DAPI+	573
68758.1	41800	3.39198	µm	Spot	Position	1	S100B+	DAPI+	575
68760.1	41806.8	3.36581	µm	Spot	Position	1	S100B+	DAPI+	576
68790	41786.6	2.60823	µm	Spot	Position	1	S100B+	DAPI+	580
68772.6	41809	2.63483	µm	Spot	Position	1	S100B+	DAPI+	582
68791.9	41788.2	2.84145	µm	Spot	Position	1	S100B+	DAPI+	588
68793.1	41797.4	2.77168	µm	Spot	Position	1	S100B+	DAPI+	592
68770.2	41811.4	2.82182	µm	Spot	Position	1	S100B+	DAPI+	594
68768.6	41796.1	3.05692	µm	Spot	Position	1	S100B+	DAPI+	597
68794.2	41798.4	3.20459	µm	Spot	Position	1	S100B+	DAPI+	598
68775.9	41808.7	3.21708	µm	Spot	Position	1	S100B+	DAPI+	599
68776	41810.1	3.01119	µm	Spot	Position	1	S100B+	DAPI+	600
68811.3	41774.5	3.4734	µm	Spot	Position	1	S100B+	DAPI+	601
68797.8	41793.5	3.46056	µm	Spot	Position	1	S100B+	DAPI+	604
68826.6	41775.6	2.62024	µm	Spot	Position	1	S100B+	DAPI+	605
68819.4	41775.8	2.79872	µm	Spot	Position	1	S100B+	DAPI+	606
68821.6	41777.7	2.80694	µm	Spot	Position	1	S100B+	DAPI+	607
68982.6	41776.5	2.86009	µm	Spot	Position	1	S100B+	DAPI+	610
68979.1	41777.2	3.1299	µm	Spot	Position	1	S100B+	DAPI+	611
69024.3	41783.9	2.90425	µm	Spot	Position	1	S100B+	DAPI+	632
69003	41787	2.88045	µm	Spot	Position	1	S100B+	DAPI+	633
69046.3	41783.6	2.76557	µm	Spot	Position	1	S100B+	DAPI+	656
69072.7	41788.1	2.81617	µm	Spot	Position	1	S100B+	DAPI+	659
69086.7	41780.7	3.31247	µm	Spot	Position	1	S100B+	DAPI+	667
69080.3	41789	3.56545	µm	Spot	Position	1	S100B+	DAPI+	668
69099.6	41786.8	2.65741	µm	Spot	Position	1	S100B+	DAPI+	675
69118.2	41787.3	2.58735	µm	Spot	Position	1	S100B+	DAPI+	677
69125.8	41786.5	3.00357	µm	Spot	Position	1	S100B+	DAPI+	684
69115.8	41790.9	3.23001	µm	Spot	Position	1	S100B+	DAPI+	686
69096.6	41785.4	3.3285	µm	Spot	Position	1	S100B+	DAPI+	687
69098.7	41786.5	3.4487	µm	Spot	Position	1	S100B+	DAPI+	690
69090	41786.7	3.43845	µm	Spot	Position	1	S100B+	DAPI+	691
69134.7	41787.2	3.31569	µm	Spot	Position	1	S100B+	DAPI+	692
69160.6	41790.4	2.94988	µm	Spot	Position	1	S100B+	DAPI+	711
69171.3	41792.6	3.1321	µm	Spot	Position	1	S100B+	DAPI+	724
69148.6	41788.5	3.40798	µm	Spot	Position	1	S100B+	DAPI+	735
69144.2	41791.8	3.50939	µm	Spot	Position	1	S100B+	DAPI+	737
69151.2	41794.2	3.49193	µm	Spot	Position	1	S100B+	DAPI+	739
69215.7	41793.2	2.45797	µm	Spot	Position	1	S100B+	DAPI+	746
69214	41795.1	3.10111	µm	Spot	Position	1	S100B+	DAPI+	777
69262.2	41809.9	2.84887	µm	Spot	Position	1	S100B+	DAPI+	804
69228.9	41795.6	3.291	µm	Spot	Position	1	S100B+	DAPI+	810
69258.9	41804.2	3.32277	µm	Spot	Position	1	S100B+	DAPI+	820
69355.9	41785.7	2.58645	µm	Spot	Position	1	S100B+	DAPI+	847
69357.5	41787.8	2.88926	µm	Spot	Position	1	S100B+	DAPI+	850
69357	41788.5	2.98929	µm	Spot	Position	1	S100B+	DAPI+	851
69335	41780.1	3.15965	µm	Spot	Position	1	S100B+	DAPI+	854
69360.9	41784.9	3.44564	µm	Spot	Position	1	S100B+	DAPI+	859
69337	41785.2	3.45451	µm	Spot	Position	1	S100B+	DAPI+	860
69359.1	41788.5	3.45775	µm	Spot	Position	1	S100B+	DAPI+	862
69334.3	41790.4	3.51925	µm	Spot	Position	1	S100B+	DAPI+	863
69381.8	41776.9	3.57571	µm	Spot	Position	1	S100B+	DAPI+	881
68664.8	41851.2	2.91223	µm	Spot	Position	1	S100B+	DAPI+	889
68659.4	41846.6	3.57895	µm	Spot	Position	1	S100B+	DAPI+	894
68668.4	41847.6	3.41943	µm	Spot	Position	1	S100B+	DAPI+	895
68666.3	41854.7	3.44259	µm	Spot	Position	1	S100B+	DAPI+	896
68748.7	41830	2.45506	µm	Spot	Position	1	S100B+	DAPI+	905
68740.1	41835	2.8006	µm	Spot	Position	1	S100B+	DAPI+	906
68736.4	41830.9	3.49501	µm	Spot	Position	1	S100B+	DAPI+	908
68664.6	41867.2	2.45316	µm	Spot	Position	1	S100B+	DAPI+	912
68661.5	41877.4	2.61411	µm	Spot	Position	1	S100B+	DAPI+	914
68641.2	41879.7	2.54108	µm	Spot	Position	1	S100B+	DAPI+	915
68661.4	41881.2	2.63287	µm	Spot	Position	1	S100B+	DAPI+	918
68647.9	41893.8	2.44314	µm	Spot	Position	1	S100B+	DAPI+	921
68664.8	41893.8	2.45953	µm	Spot	Position	1	S100B+	DAPI+	922
68662.4	41894.8	2.60307	µm	Spot	Position	1	S100B+	DAPI+	923
68668	41895.7	2.59727	µm	Spot	Position	1	S100B+	DAPI+	924
68645.8	41877.9	2.7474	µm	Spot	Position	1	S100B+	DAPI+	928
68645.9	41879.6	2.76416	µm	Spot	Position	1	S100B+	DAPI+	929
68645.4	41875.6	3.08287	µm	Spot	Position	1	S100B+	DAPI+	939
68642.5	41880.5	3.2492	µm	Spot	Position	1	S100B+	DAPI+	942
69615.4	41676.1	4.13381	µm	Spot	Position	1	S100B+	DAPI+	950
69481.9	41720.2	4.57239	µm	Spot	Position	1	S100B+	DAPI+	962
69504.7	41726.4	4.52472	µm	Spot	Position	1	S100B+	DAPI+	964
69538.3	41715	3.76493	µm	Spot	Position	1	S100B+	DAPI+	971
69531	41718.1	3.79341	µm	Spot	Position	1	S100B+	DAPI+	973
69518.5	41722.3	3.72913	µm	Spot	Position	1	S100B+	DAPI+	977
69524.7	41716.7	3.97897	µm	Spot	Position	1	S100B+	DAPI+	982
69513	41723.7	3.96192	µm	Spot	Position	1	S100B+	DAPI+	983
69530.5	41714.2	4.32427	µm	Spot	Position	1	S100B+	DAPI+	987
69517.3	41717.6	4.5856	µm	Spot	Position	1	S100B+	DAPI+	993
69521.5	41720.8	4.7458	µm	Spot	Position	1	S100B+	DAPI+	994
69516.5	41723.5	4.62466	µm	Spot	Position	1	S100B+	DAPI+	995
68827.9	41765.5	3.86233	µm	Spot	Position	1	S100B+	DAPI+	1005
68841.1	41763.6	4.01363	µm	Spot	Position	1	S100B+	DAPI+	1007
68837.5	41763.5	4.46863	µm	Spot	Position	1	S100B+	DAPI+	1009
68824.6	41768.8	4.75234	µm	Spot	Position	1	S100B+	DAPI+	1010
68829.3	41772.8	4.68666	µm	Spot	Position	1	S100B+	DAPI+	1011
68889.3	41768.7	3.64806	µm	Spot	Position	1	S100B+	DAPI+	1013
68889.5	41763.8	4.11352	µm	Spot	Position	1	S100B+	DAPI+	1014
68861.9	41765.7	4.09829	µm	Spot	Position	1	S100B+	DAPI+	1015
68873.9	41770.3	4.05565	µm	Spot	Position	1	S100B+	DAPI+	1016
68891.7	41765.3	4.7365	µm	Spot	Position	1	S100B+	DAPI+	1019
68911.1	41764.9	3.97662	µm	Spot	Position	1	S100B+	DAPI+	1024
68925.7	41766.5	4.1706	µm	Spot	Position	1	S100B+	DAPI+	1025
68934.8	41767	3.98175	µm	Spot	Position	1	S100B+	DAPI+	1026
68920.7	41768.1	4.3757	µm	Spot	Position	1	S100B+	DAPI+	1030
68923.3	41760.5	4.60161	µm	Spot	Position	1	S100B+	DAPI+	1031
68938.3	41768.4	4.71097	µm	Spot	Position	1	S100B+	DAPI+	1033
68959.2	41770.4	3.67657	µm	Spot	Position	1	S100B+	DAPI+	1037
68966.6	41772.9	3.92983	µm	Spot	Position	1	S100B+	DAPI+	1038
68968.2	41772.3	4.37854	µm	Spot	Position	1	S100B+	DAPI+	1039
68968.7	41766.9	4.72543	µm	Spot	Position	1	S100B+	DAPI+	1041
69425.1	41757.5	3.62849	µm	Spot	Position	1	S100B+	DAPI+	1063
69433	41758.5	3.74501	µm	Spot	Position	1	S100B+	DAPI+	1064
69438	41752.5	4.44715	µm	Spot	Position	1	S100B+	DAPI+	1078
69476.6	41738.3	3.78568	µm	Spot	Position	1	S100B+	DAPI+	1092
69481.8	41735.2	3.99663	µm	Spot	Position	1	S100B+	DAPI+	1095
69467.6	41741.7	4.0278	µm	Spot	Position	1	S100B+	DAPI+	1096
69465.2	41740.7	4.78867	µm	Spot	Position	1	S100B+	DAPI+	1108
68759.5	41805.4	3.6376	µm	Spot	Position	1	S100B+	DAPI+	1110
68761.4	41805.6	3.67135	µm	Spot	Position	1	S100B+	DAPI+	1111
68736.2	41819.6	3.85226	µm	Spot	Position	1	S100B+	DAPI+	1113
68747.3	41815.9	4.48134	µm	Spot	Position	1	S100B+	DAPI+	1126
68799.9	41796.1	3.74355	µm	Spot	Position	1	S100B+	DAPI+	1134
68783.1	41805.1	4.10155	µm	Spot	Position	1	S100B+	DAPI+	1141
68768.5	41818.4	3.92646	µm	Spot	Position	1	S100B+	DAPI+	1142
68814.9	41779.6	4.18625	µm	Spot	Position	1	S100B+	DAPI+	1154
68826.6	41776.1	4.53389	µm	Spot	Position	1	S100B+	DAPI+	1155
68971.7	41775.8	3.78996	µm	Spot	Position	1	S100B+	DAPI+	1156
68968.5	41774.4	4.26707	µm	Spot	Position	1	S100B+	DAPI+	1159
68969.5	41775.3	4.36379	µm	Spot	Position	1	S100B+	DAPI+	1160
68991	41778.9	4.42572	µm	Spot	Position	1	S100B+	DAPI+	1161
68979.8	41777.7	4.55976	µm	Spot	Position	1	S100B+	DAPI+	1163
69008.9	41776.6	3.78545	µm	Spot	Position	1	S100B+	DAPI+	1164
69030.3	41782	3.74596	µm	Spot	Position	1	S100B+	DAPI+	1165
69040.2	41788.1	4.03803	µm	Spot	Position	1	S100B+	DAPI+	1167
69041	41788.2	4.0098	µm	Spot	Position	1	S100B+	DAPI+	1168
69029.5	41782.7	4.59605	µm	Spot	Position	1	S100B+	DAPI+	1169
69035.2	41786	4.62852	µm	Spot	Position	1	S100B+	DAPI+	1170
69054.3	41786.5	4.12887	µm	Spot	Position	1	S100B+	DAPI+	1174
69062.1	41788.4	4.15942	µm	Spot	Position	1	S100B+	DAPI+	1175
69086.1	41787.4	4.49752	µm	Spot	Position	1	S100B+	DAPI+	1177
69103.4	41784.8	3.87449	µm	Spot	Position	1	S100B+	DAPI+	1180
69124.1	41787.1	3.92322	µm	Spot	Position	1	S100B+	DAPI+	1182
69090.4	41786.7	4.23405	µm	Spot	Position	1	S100B+	DAPI+	1185
69117.8	41791.6	4.68103	µm	Spot	Position	1	S100B+	DAPI+	1189
69136.9	41788	3.72391	µm	Spot	Position	1	S100B+	DAPI+	1197
69148.8	41790.5	3.84675	µm	Spot	Position	1	S100B+	DAPI+	1198
69145.6	41791.1	3.65069	µm	Spot	Position	1	S100B+	DAPI+	1199
69168.2	41792.3	3.67379	µm	Spot	Position	1	S100B+	DAPI+	1202
69146.3	41793.7	3.83191	µm	Spot	Position	1	S100B+	DAPI+	1204
69160.3	41791.4	3.99483	µm	Spot	Position	1	S100B+	DAPI+	1210
69152.6	41794.4	3.94219	µm	Spot	Position	1	S100B+	DAPI+	1212
69148.1	41795.8	4.07039	µm	Spot	Position	1	S100B+	DAPI+	1214
69177.6	41787.1	4.32131	µm	Spot	Position	1	S100B+	DAPI+	1219
69137.8	41792.4	4.34456	µm	Spot	Position	1	S100B+	DAPI+	1221
69139.7	41794.1	4.31723	µm	Spot	Position	1	S100B+	DAPI+	1223
69145.4	41794.8	4.29906	µm	Spot	Position	1	S100B+	DAPI+	1224
69138	41786.6	4.55069	µm	Spot	Position	1	S100B+	DAPI+	1226
69217.9	41792.4	3.85302	µm	Spot	Position	1	S100B+	DAPI+	1248
69203.7	41788.4	4.09312	µm	Spot	Position	1	S100B+	DAPI+	1260
69213.3	41789	4.10674	µm	Spot	Position	1	S100B+	DAPI+	1261
69202.3	41789.6	4.15468	µm	Spot	Position	1	S100B+	DAPI+	1262
69224.1	41796.4	4.12911	µm	Spot	Position	1	S100B+	DAPI+	1265
69197	41791.4	4.23395	µm	Spot	Position	1	S100B+	DAPI+	1271
69219.8	41791.2	4.51862	µm	Spot	Position	1	S100B+	DAPI+	1281
69232.6	41797.8	3.63821	µm	Spot	Position	1	S100B+	DAPI+	1291
69237.4	41800.2	4.07903	µm	Spot	Position	1	S100B+	DAPI+	1300
69257	41801.9	4.75519	µm	Spot	Position	1	S100B+	DAPI+	1311
69260.9	41801.9	4.54483	µm	Spot	Position	1	S100B+	DAPI+	1312
69244.2	41802.6	4.76993	µm	Spot	Position	1	S100B+	DAPI+	1313
69239.3	41803	4.72544	µm	Spot	Position	1	S100B+	DAPI+	1315
69266.6	41804.6	4.72737	µm	Spot	Position	1	S100B+	DAPI+	1318
69306.5	41807.2	3.86254	µm	Spot	Position	1	S100B+	DAPI+	1328
69309.8	41806.3	4.18166	µm	Spot	Position	1	S100B+	DAPI+	1335
69281.2	41808.3	3.94649	µm	Spot	Position	1	S100B+	DAPI+	1337
69295.9	41809.5	4.12516	µm	Spot	Position	1	S100B+	DAPI+	1338
69291.4	41810.6	3.95383	µm	Spot	Position	1	S100B+	DAPI+	1339
69317	41802.5	4.51096	µm	Spot	Position	1	S100B+	DAPI+	1347
69335.7	41784.8	4.07252	µm	Spot	Position	1	S100B+	DAPI+	1357
69321	41788.1	4.02557	µm	Spot	Position	1	S100B+	DAPI+	1358
69334.7	41782.2	4.48919	µm	Spot	Position	1	S100B+	DAPI+	1365
69337	41791.8	4.23931	µm	Spot	Position	1	S100B+	DAPI+	1371
69330.4	41788.4	4.7949	µm	Spot	Position	1	S100B+	DAPI+	1375
69372.8	41783.8	4.67526	µm	Spot	Position	1	S100B+	DAPI+	1393
68673.8	41845.1	4.07763	µm	Spot	Position	1	S100B+	DAPI+	1397
68662.9	41861.4	3.91135	µm	Spot	Position	1	S100B+	DAPI+	1398
68661.8	41850.8	4.22777	µm	Spot	Position	1	S100B+	DAPI+	1400
68635.7	41862.1	4.36909	µm	Spot	Position	1	S100B+	DAPI+	1402
68672.5	41846.2	4.575	µm	Spot	Position	1	S100B+	DAPI+	1403
68709.6	41848.1	3.76535	µm	Spot	Position	1	S100B+	DAPI+	1405
68710.4	41834.8	4.07145	µm	Spot	Position	1	S100B+	DAPI+	1406
68707.8	41848.7	4.19663	µm	Spot	Position	1	S100B+	DAPI+	1409
68685.9	41862.2	4.0659	µm	Spot	Position	1	S100B+	DAPI+	1410
68688.6	41858.3	4.39616	µm	Spot	Position	1	S100B+	DAPI+	1411
68714.5	41831.8	4.61103	µm	Spot	Position	1	S100B+	DAPI+	1412
68689	41848.8	4.51338	µm	Spot	Position	1	S100B+	DAPI+	1413
68682.6	41862.3	4.78851	µm	Spot	Position	1	S100B+	DAPI+	1414
68677.6	41864.3	4.73198	µm	Spot	Position	1	S100B+	DAPI+	1415
68734.2	41826.9	3.75468	µm	Spot	Position	1	S100B+	DAPI+	1416
68732.6	41834.5	3.91376	µm	Spot	Position	1	S100B+	DAPI+	1417
68743.2	41820.4	4.4207	µm	Spot	Position	1	S100B+	DAPI+	1418
68761.6	41820.3	4.48466	µm	Spot	Position	1	S100B+	DAPI+	1419
68735.2	41827.5	4.38515	µm	Spot	Position	1	S100B+	DAPI+	1420
68753.1	41828.2	4.27583	µm	Spot	Position	1	S100B+	DAPI+	1421
68751.6	41828.4	4.53169	µm	Spot	Position	1	S100B+	DAPI+	1422
68640.7	41866.8	3.61002	µm	Spot	Position	1	S100B+	DAPI+	1425
68665.6	41893.3	3.63528	µm	Spot	Position	1	S100B+	DAPI+	1426
68662.8	41879.1	4.06762	µm	Spot	Position	1	S100B+	DAPI+	1427
68666.2	41882.8	3.91681	µm	Spot	Position	1	S100B+	DAPI+	1428
68667.2	41893.2	4.08568	µm	Spot	Position	1	S100B+	DAPI+	1430
68641.4	41867.8	4.36077	µm	Spot	Position	1	S100B+	DAPI+	1434
68642.1	41886.5	4.40172	µm	Spot	Position	1	S100B+	DAPI+	1437
68645.7	41890.3	4.55679	µm	Spot	Position	1	S100B+	DAPI+	1439
69615.9	41669.6	5.04219	µm	Spot	Position	1	S100B+	DAPI+	1459
69733.2	41654.3	5.93209	µm	Spot	Position	1	S100B+	DAPI+	1461
69517.3	41717.8	5.40753	µm	Spot	Position	1	S100B+	DAPI+	1478
69523	41719.5	5.72971	µm	Spot	Position	1	S100B+	DAPI+	1481
69579.6	41688.5	4.92603	µm	Spot	Position	1	S100B+	DAPI+	1482
69566	41694.5	4.87022	µm	Spot	Position	1	S100B+	DAPI+	1483
68857	41767.4	4.87437	µm	Spot	Position	1	S100B+	DAPI+	1493
68831.8	41766.5	5.54147	µm	Spot	Position	1	S100B+	DAPI+	1496
68895.1	41761.9	4.90292	µm	Spot	Position	1	S100B+	DAPI+	1498
68888	41770.5	5.28046	µm	Spot	Position	1	S100B+	DAPI+	1499
68902.4	41763.4	5.53483	µm	Spot	Position	1	S100B+	DAPI+	1500
68898.1	41766.8	5.6772	µm	Spot	Position	1	S100B+	DAPI+	1501
68908.3	41766.4	5.2162	µm	Spot	Position	1	S100B+	DAPI+	1505
68924.7	41767.4	5.18577	µm	Spot	Position	1	S100B+	DAPI+	1506
68949.6	41770.1	5.34134	µm	Spot	Position	1	S100B+	DAPI+	1507
68919.5	41768.3	5.82916	µm	Spot	Position	1	S100B+	DAPI+	1508
68968.7	41770.9	5.11272	µm	Spot	Position	1	S100B+	DAPI+	1509
68981.9	41767.9	5.53161	µm	Spot	Position	1	S100B+	DAPI+	1510
69455.4	41745.2	5.10618	µm	Spot	Position	1	S100B+	DAPI+	1529
69424	41760.5	5.61459	µm	Spot	Position	1	S100B+	DAPI+	1535
69431.2	41752.3	5.93677	µm	Spot	Position	1	S100B+	DAPI+	1538
69482.3	41731.4	5.06059	µm	Spot	Position	1	S100B+	DAPI+	1539
69492.5	41731.1	5.10977	µm	Spot	Position	1	S100B+	DAPI+	1541
69472.2	41740.4	5.57999	µm	Spot	Position	1	S100B+	DAPI+	1547
69491.6	41732.2	5.90885	µm	Spot	Position	1	S100B+	DAPI+	1548
68751.7	41802.4	5.00375	µm	Spot	Position	1	S100B+	DAPI+	1552
68748.6	41804.6	5.01838	µm	Spot	Position	1	S100B+	DAPI+	1553
68794	41781.3	4.97871	µm	Spot	Position	1	S100B+	DAPI+	1556
68780	41808	5.08604	µm	Spot	Position	1	S100B+	DAPI+	1557
68773.1	41810.7	4.89417	µm	Spot	Position	1	S100B+	DAPI+	1558
68797.7	41797.7	5.21219	µm	Spot	Position	1	S100B+	DAPI+	1560
68791.2	41789.2	5.8399	µm	Spot	Position	1	S100B+	DAPI+	1563
68770.3	41799.2	5.93085	µm	Spot	Position	1	S100B+	DAPI+	1567
68778.9	41806.4	5.75093	µm	Spot	Position	1	S100B+	DAPI+	1568
68812.8	41778.5	4.85784	µm	Spot	Position	1	S100B+	DAPI+	1569
68824.3	41776.9	5.12348	µm	Spot	Position	1	S100B+	DAPI+	1570
68822.5	41778	5.15701	µm	Spot	Position	1	S100B+	DAPI+	1571
68982.9	41778.5	5.11777	µm	Spot	Position	1	S100B+	DAPI+	1573
69016	41786.1	4.85523	µm	Spot	Position	1	S100B+	DAPI+	1577
69063.4	41779.7	4.87756	µm	Spot	Position	1	S100B+	DAPI+	1579
69078.1	41790.1	4.856	µm	Spot	Position	1	S100B+	DAPI+	1580
69055.9	41785.8	5.64774	µm	Spot	Position	1	S100B+	DAPI+	1583
69051.4	41784.8	5.7834	µm	Spot	Position	1	S100B+	DAPI+	1587
69110.9	41788.3	4.83924	µm	Spot	Position	1	S100B+	DAPI+	1590
69101.5	41782.2	5.5902	µm	Spot	Position	1	S100B+	DAPI+	1593
69123.4	41788.1	5.67312	µm	Spot	Position	1	S100B+	DAPI+	1594
69135.6	41792	5.92898	µm	Spot	Position	1	S100B+	DAPI+	1597
69143.1	41795.7	5.34724	µm	Spot	Position	1	S100B+	DAPI+	1605
69138.2	41791	5.63823	µm	Spot	Position	1	S100B+	DAPI+	1606
69158.1	41792.3	5.49562	µm	Spot	Position	1	S100B+	DAPI+	1607
69166	41794.4	5.70014	µm	Spot	Position	1	S100B+	DAPI+	1608
69181.4	41794.9	5.48505	µm	Spot	Position	1	S100B+	DAPI+	1609
69159.3	41793.4	5.71101	µm	Spot	Position	1	S100B+	DAPI+	1611
69153.6	41793.8	5.84113	µm	Spot	Position	1	S100B+	DAPI+	1612
69226.6	41793.8	5.01304	µm	Spot	Position	1	S100B+	DAPI+	1615
69219.2	41797.1	4.85347	µm	Spot	Position	1	S100B+	DAPI+	1616
69205.6	41797.3	4.86029	µm	Spot	Position	1	S100B+	DAPI+	1617
69201.4	41798.2	4.91412	µm	Spot	Position	1	S100B+	DAPI+	1618
69200.6	41786.1	5.23481	µm	Spot	Position	1	S100B+	DAPI+	1620
69197.2	41785	5.44197	µm	Spot	Position	1	S100B+	DAPI+	1623
69221.4	41791.7	5.54254	µm	Spot	Position	1	S100B+	DAPI+	1624
69190.7	41792.3	5.42811	µm	Spot	Position	1	S100B+	DAPI+	1625
69219.2	41799.8	5.5258	µm	Spot	Position	1	S100B+	DAPI+	1627
69203	41788.8	5.75055	µm	Spot	Position	1	S100B+	DAPI+	1628
69224.5	41802.2	5.83302	µm	Spot	Position	1	S100B+	DAPI+	1629
69233.8	41805	4.93902	µm	Spot	Position	1	S100B+	DAPI+	1635
69263.2	41803.1	5.31419	µm	Spot	Position	1	S100B+	DAPI+	1641
69266.1	41801.6	5.61666	µm	Spot	Position	1	S100B+	DAPI+	1648
69246.1	41804.8	5.56735	µm	Spot	Position	1	S100B+	DAPI+	1650
69232.6	41801.3	5.81592	µm	Spot	Position	1	S100B+	DAPI+	1654
69236.3	41803.7	5.81492	µm	Spot	Position	1	S100B+	DAPI+	1655
69245.1	41806.3	5.9007	µm	Spot	Position	1	S100B+	DAPI+	1656
69319.9	41793.8	5.39597	µm	Spot	Position	1	S100B+	DAPI+	1663
69286	41805.6	5.18368	µm	Spot	Position	1	S100B+	DAPI+	1666
69297.3	41807	5.38444	µm	Spot	Position	1	S100B+	DAPI+	1667
69318.6	41791.5	5.53968	µm	Spot	Position	1	S100B+	DAPI+	1668
69309.8	41796.3	5.46468	µm	Spot	Position	1	S100B+	DAPI+	1669
69316.6	41799.5	5.53845	µm	Spot	Position	1	S100B+	DAPI+	1674
69359.2	41788.6	4.99336	µm	Spot	Position	1	S100B+	DAPI+	1686
69329.7	41780.4	5.3454	µm	Spot	Position	1	S100B+	DAPI+	1690
69334	41781.8	5.27921	µm	Spot	Position	1	S100B+	DAPI+	1691
69333.8	41784.2	5.2239	µm	Spot	Position	1	S100B+	DAPI+	1692
69331	41784.6	5.9225	µm	Spot	Position	1	S100B+	DAPI+	1702
69361.5	41794.9	5.92868	µm	Spot	Position	1	S100B+	DAPI+	1704
69363.8	41796.4	5.7071	µm	Spot	Position	1	S100B+	DAPI+	1705
69320.8	41798.9	5.80866	µm	Spot	Position	1	S100B+	DAPI+	1706
69335.8	41799.5	5.94925	µm	Spot	Position	1	S100B+	DAPI+	1707
69366.7	41779.4	4.84273	µm	Spot	Position	1	S100B+	DAPI+	1708
69368.3	41780.9	5.04144	µm	Spot	Position	1	S100B+	DAPI+	1709
69387.5	41784.4	5.97496	µm	Spot	Position	1	S100B+	DAPI+	1716
69368.7	41797.4	5.8394	µm	Spot	Position	1	S100B+	DAPI+	1719
68671.4	41846.6	4.91749	µm	Spot	Position	1	S100B+	DAPI+	1720
68672.1	41849.6	5.09271	µm	Spot	Position	1	S100B+	DAPI+	1721
68673.7	41846.5	5.27591	µm	Spot	Position	1	S100B+	DAPI+	1722
68670.9	41848.8	5.14645	µm	Spot	Position	1	S100B+	DAPI+	1723
68671.2	41850.6	5.17482	µm	Spot	Position	1	S100B+	DAPI+	1724
68641.8	41853.5	5.22386	µm	Spot	Position	1	S100B+	DAPI+	1725
68646.8	41865.2	5.60658	µm	Spot	Position	1	S100B+	DAPI+	1728
68657.3	41857.2	5.73854	µm	Spot	Position	1	S100B+	DAPI+	1729
68679.9	41863.1	5.06851	µm	Spot	Position	1	S100B+	DAPI+	1733
68674.6	41849	5.99946	µm	Spot	Position	1	S100B+	DAPI+	1734
68688.2	41849.9	5.80833	µm	Spot	Position	1	S100B+	DAPI+	1735
68749.5	41827.9	4.84048	µm	Spot	Position	1	S100B+	DAPI+	1736
68737.8	41834.6	5.47117	µm	Spot	Position	1	S100B+	DAPI+	1739
68732.2	41836.7	5.50677	µm	Spot	Position	1	S100B+	DAPI+	1740
68651.2	41874.7	4.92897	µm	Spot	Position	1	S100B+	DAPI+	1742
68666.4	41877.2	5.26943	µm	Spot	Position	1	S100B+	DAPI+	1745
68644.3	41892.7	5.48958	µm	Spot	Position	1	S100B+	DAPI+	1747
68667.1	41891.2	5.97484	µm	Spot	Position	1	S100B+	DAPI+	1751
69619.4	41675.8	6.47283	µm	Spot	Position	1	S100B+	DAPI+	1768
69534.5	41714	6.0758	µm	Spot	Position	1	S100B+	DAPI+	1783
69532	41718.1	6.11152	µm	Spot	Position	1	S100B+	DAPI+	1787
69535.7	41714.8	6.67263	µm	Spot	Position	1	S100B+	DAPI+	1790
69533.8	41715.9	6.79069	µm	Spot	Position	1	S100B+	DAPI+	1791
69576.9	41686.4	6.62922	µm	Spot	Position	1	S100B+	DAPI+	1800
69560.5	41692.9	6.76017	µm	Spot	Position	1	S100B+	DAPI+	1801
69558.8	41694	7.028	µm	Spot	Position	1	S100B+	DAPI+	1802
69556.4	41707.5	6.97306	µm	Spot	Position	1	S100B+	DAPI+	1803
68826.8	41767.8	6.79321	µm	Spot	Position	1	S100B+	DAPI+	1806
68822.5	41768.8	6.65848	µm	Spot	Position	1	S100B+	DAPI+	1807
68818.9	41770.8	6.61661	µm	Spot	Position	1	S100B+	DAPI+	1808
68828.8	41767.5	7.09523	µm	Spot	Position	1	S100B+	DAPI+	1810
68895.9	41766.8	6.22446	µm	Spot	Position	1	S100B+	DAPI+	1811
68872.9	41770.7	6.25162	µm	Spot	Position	1	S100B+	DAPI+	1812
68895.9	41764.3	6.35956	µm	Spot	Position	1	S100B+	DAPI+	1813
68929	41767.1	6.28722	µm	Spot	Position	1	S100B+	DAPI+	1815
68946	41771.4	6.19307	µm	Spot	Position	1	S100B+	DAPI+	1816
68940.1	41768.5	6.86879	µm	Spot	Position	1	S100B+	DAPI+	1817
68928.5	41767.9	6.97568	µm	Spot	Position	1	S100B+	DAPI+	1819
68943.5	41772.3	7.02694	µm	Spot	Position	1	S100B+	DAPI+	1820
68966.9	41768.1	6.54541	µm	Spot	Position	1	S100B+	DAPI+	1822
68979.1	41768.2	6.48551	µm	Spot	Position	1	S100B+	DAPI+	1823
68960	41772.7	6.35909	µm	Spot	Position	1	S100B+	DAPI+	1825
68970.6	41769.1	6.6162	µm	Spot	Position	1	S100B+	DAPI+	1826
69447.7	41752.2	6.16303	µm	Spot	Position	1	S100B+	DAPI+	1837
69426.8	41760.6	6.10051	µm	Spot	Position	1	S100B+	DAPI+	1838
69458.7	41747	6.55417	µm	Spot	Position	1	S100B+	DAPI+	1839
69501.1	41732.6	6.54035	µm	Spot	Position	1	S100B+	DAPI+	1842
69493.2	41734.9	6.50712	µm	Spot	Position	1	S100B+	DAPI+	1844
69490.6	41735.2	6.85777	µm	Spot	Position	1	S100B+	DAPI+	1847
69484.4	41738	7.09329	µm	Spot	Position	1	S100B+	DAPI+	1850
69470.3	41739.9	6.9835	µm	Spot	Position	1	S100B+	DAPI+	1851
68802	41790.4	6.14135	µm	Spot	Position	1	S100B+	DAPI+	1856
68773.7	41816.1	6.19747	µm	Spot	Position	1	S100B+	DAPI+	1857
68831.1	41774.6	6.27905	µm	Spot	Position	1	S100B+	DAPI+	1862
68817.2	41777.5	6.54824	µm	Spot	Position	1	S100B+	DAPI+	1864
68817	41779.9	6.37156	µm	Spot	Position	1	S100B+	DAPI+	1866
68986.2	41778.5	6.19447	µm	Spot	Position	1	S100B+	DAPI+	1867
68988.7	41779.1	6.30752	µm	Spot	Position	1	S100B+	DAPI+	1868
68994.2	41774.2	6.68658	µm	Spot	Position	1	S100B+	DAPI+	1869
68992.2	41781.2	6.86334	µm	Spot	Position	1	S100B+	DAPI+	1870
69007.2	41778.2	6.02458	µm	Spot	Position	1	S100B+	DAPI+	1871
69007.3	41779	6.28684	µm	Spot	Position	1	S100B+	DAPI+	1872
69034.5	41784.1	6.03402	µm	Spot	Position	1	S100B+	DAPI+	1873
69029.4	41785	7.10008	µm	Spot	Position	1	S100B+	DAPI+	1874
69065.3	41787.6	6.38087	µm	Spot	Position	1	S100B+	DAPI+	1875
69075.8	41790	6.34889	µm	Spot	Position	1	S100B+	DAPI+	1876
69059.7	41790.2	6.56216	µm	Spot	Position	1	S100B+	DAPI+	1877
69071.2	41786	6.74433	µm	Spot	Position	1	S100B+	DAPI+	1878
69067.9	41786.6	6.64948	µm	Spot	Position	1	S100B+	DAPI+	1879
69097	41783.3	6.50641	µm	Spot	Position	1	S100B+	DAPI+	1880
69104.3	41787.6	7.11465	µm	Spot	Position	1	S100B+	DAPI+	1883
69156.4	41789.9	6.60155	µm	Spot	Position	1	S100B+	DAPI+	1886
69164.7	41795.9	6.39455	µm	Spot	Position	1	S100B+	DAPI+	1887
69187.1	41795	6.27851	µm	Spot	Position	1	S100B+	DAPI+	1892
69204	41799.1	6.15962	µm	Spot	Position	1	S100B+	DAPI+	1894
69185.2	41795.9	6.84789	µm	Spot	Position	1	S100B+	DAPI+	1904
69237.8	41804.7	6.03634	µm	Spot	Position	1	S100B+	DAPI+	1908
69264.6	41805.8	6.3004	µm	Spot	Position	1	S100B+	DAPI+	1909
69260.2	41800	6.53104	µm	Spot	Position	1	S100B+	DAPI+	1914
69234.1	41802.4	6.34356	µm	Spot	Position	1	S100B+	DAPI+	1916
69256.4	41809.5	6.32233	µm	Spot	Position	1	S100B+	DAPI+	1917
69240.4	41803	6.8633	µm	Spot	Position	1	S100B+	DAPI+	1922
69263.1	41809.2	7.03946	µm	Spot	Position	1	S100B+	DAPI+	1927
69308.4	41795.8	6.01234	µm	Spot	Position	1	S100B+	DAPI+	1928
69295.9	41799.5	6.1331	µm	Spot	Position	1	S100B+	DAPI+	1930
69313.9	41802.9	6.20514	µm	Spot	Position	1	S100B+	DAPI+	1931
69305.7	41808.4	6.29997	µm	Spot	Position	1	S100B+	DAPI+	1932
69320.3	41801.3	6.37585	µm	Spot	Position	1	S100B+	DAPI+	1934
69306.7	41807.2	6.34167	µm	Spot	Position	1	S100B+	DAPI+	1935
69314.2	41805.6	6.709	µm	Spot	Position	1	S100B+	DAPI+	1939
69333.4	41783.5	6.01499	µm	Spot	Position	1	S100B+	DAPI+	1941
69339.9	41798.1	6.05566	µm	Spot	Position	1	S100B+	DAPI+	1942
69322.9	41801.1	6.14473	µm	Spot	Position	1	S100B+	DAPI+	1944
69324.2	41802.6	6.15906	µm	Spot	Position	1	S100B+	DAPI+	1945
69333.2	41780.9	6.37883	µm	Spot	Position	1	S100B+	DAPI+	1946
69344.4	41788.1	6.90441	µm	Spot	Position	1	S100B+	DAPI+	1950
69365.1	41793.3	6.83121	µm	Spot	Position	1	S100B+	DAPI+	1951
69343.6	41794.7	6.74611	µm	Spot	Position	1	S100B+	DAPI+	1952
69366	41795.4	6.74559	µm	Spot	Position	1	S100B+	DAPI+	1953
69325.3	41796.5	6.76857	µm	Spot	Position	1	S100B+	DAPI+	1954
69339.3	41797.6	6.8033	µm	Spot	Position	1	S100B+	DAPI+	1955
69334.5	41798.8	6.88517	µm	Spot	Position	1	S100B+	DAPI+	1956
69338.5	41800.6	6.72665	µm	Spot	Position	1	S100B+	DAPI+	1958
69329.4	41780.7	6.93054	µm	Spot	Position	1	S100B+	DAPI+	1959
69338.3	41798.6	6.93824	µm	Spot	Position	1	S100B+	DAPI+	1961
69349	41800.7	6.98492	µm	Spot	Position	1	S100B+	DAPI+	1962
69398.1	41780	6.08415	µm	Spot	Position	1	S100B+	DAPI+	1964
68659.3	41853.2	6.06422	µm	Spot	Position	1	S100B+	DAPI+	1969
68672.9	41850.6	6.40578	µm	Spot	Position	1	S100B+	DAPI+	1970
68650.6	41857.4	6.56932	µm	Spot	Position	1	S100B+	DAPI+	1972
68666.8	41844.1	7.00955	µm	Spot	Position	1	S100B+	DAPI+	1974
68648	41851.7	7.01099	µm	Spot	Position	1	S100B+	DAPI+	1975
68667.5	41861.7	7.18107	µm	Spot	Position	1	S100B+	DAPI+	1976
68714.2	41847	6.28728	µm	Spot	Position	1	S100B+	DAPI+	1977
68685.9	41848.7	6.06987	µm	Spot	Position	1	S100B+	DAPI+	1978
68716.5	41846	6.74368	µm	Spot	Position	1	S100B+	DAPI+	1980
68675.5	41864.1	6.79584	µm	Spot	Position	1	S100B+	DAPI+	1981
68718.9	41844.4	6.96427	µm	Spot	Position	1	S100B+	DAPI+	1984
68694.3	41853.5	7.07046	µm	Spot	Position	1	S100B+	DAPI+	1985
68729.8	41824.4	6.13142	µm	Spot	Position	1	S100B+	DAPI+	1986
68733.5	41837.4	6.21339	µm	Spot	Position	1	S100B+	DAPI+	1987
68728.8	41843	6.20048	µm	Spot	Position	1	S100B+	DAPI+	1988
68756.7	41824.8	6.4128	µm	Spot	Position	1	S100B+	DAPI+	1990
68754.1	41826	6.42919	µm	Spot	Position	1	S100B+	DAPI+	1991
68731.8	41840.5	6.35038	µm	Spot	Position	1	S100B+	DAPI+	1992
68727.4	41842.3	6.38105	µm	Spot	Position	1	S100B+	DAPI+	1993
68669.2	41878.7	6.96459	µm	Spot	Position	1	S100B+	DAPI+	1996
69695.2	41235.9	7.50514	µm	Spot	Position	1	S100B+	DAPI+	2001
69619.9	41673.3	7.83612	µm	Spot	Position	1	S100B+	DAPI+	2018
69531	41718.7	7.33076	µm	Spot	Position	1	S100B+	DAPI+	2030
69548.4	41713.3	8.1358	µm	Spot	Position	1	S100B+	DAPI+	2036
69579.8	41695.7	8.02025	µm	Spot	Position	1	S100B+	DAPI+	2040
69560.4	41708.4	8.11152	µm	Spot	Position	1	S100B+	DAPI+	2042
68928.4	41769.2	8.06171	µm	Spot	Position	1	S100B+	DAPI+	2046
69428.4	41759.4	7.43324	µm	Spot	Position	1	S100B+	DAPI+	2051
69458.4	41744.4	7.77998	µm	Spot	Position	1	S100B+	DAPI+	2052
69455.7	41749.1	7.64852	µm	Spot	Position	1	S100B+	DAPI+	2053
69452.2	41751.2	8.10261	µm	Spot	Position	1	S100B+	DAPI+	2054
69498.5	41735	7.27959	µm	Spot	Position	1	S100B+	DAPI+	2055
69492.3	41736.6	7.74423	µm	Spot	Position	1	S100B+	DAPI+	2058
69070.2	41787.3	7.89501	µm	Spot	Position	1	S100B+	DAPI+	2070
69102.4	41786.5	7.32102	µm	Spot	Position	1	S100B+	DAPI+	2074
69091.1	41782.3	7.75796	µm	Spot	Position	1	S100B+	DAPI+	2077
69095.9	41785.6	7.68637	µm	Spot	Position	1	S100B+	DAPI+	2078
69097.8	41786.9	8.01998	µm	Spot	Position	1	S100B+	DAPI+	2083
69110.1	41788.3	7.88366	µm	Spot	Position	1	S100B+	DAPI+	2084
69171.2	41791.5	7.39582	µm	Spot	Position	1	S100B+	DAPI+	2086
69235.3	41801.8	7.61487	µm	Spot	Position	1	S100B+	DAPI+	2102
69334.1	41800.4	7.22436	µm	Spot	Position	1	S100B+	DAPI+	2119
69355.6	41801.8	7.30206	µm	Spot	Position	1	S100B+	DAPI+	2120
69341.4	41789.8	7.60742	µm	Spot	Position	1	S100B+	DAPI+	2121
69341.2	41798.7	7.66741	µm	Spot	Position	1	S100B+	DAPI+	2123
69325.6	41792.3	7.95175	µm	Spot	Position	1	S100B+	DAPI+	2125
69399.3	41775.6	7.53639	µm	Spot	Position	1	S100B+	DAPI+	2126
69369.2	41794.5	7.68392	µm	Spot	Position	1	S100B+	DAPI+	2129
68641.2	41864.4	7.62097	µm	Spot	Position	1	S100B+	DAPI+	2131
68695.9	41844.8	7.36728	µm	Spot	Position	1	S100B+	DAPI+	2134
68688.1	41847.8	7.71351	µm	Spot	Position	1	S100B+	DAPI+	2135
68685.2	41842.1	7.88893	µm	Spot	Position	1	S100B+	DAPI+	2136
68731.4	41836.3	7.84299	µm	Spot	Position	1	S100B+	DAPI+	2137
68669	41875.2	7.41339	µm	Spot	Position	1	S100B+	DAPI+	2139
68642.4	41879.6	7.71138	µm	Spot	Position	1	S100B+	DAPI+	2140
68657.5	41895.9	7.62907	µm	Spot	Position	1	S100B+	DAPI+	2143
68656.4	41895.7	7.96596	µm	Spot	Position	1	S100B+	DAPI+	2145
69763.8	41342.9	8.76134	µm	Spot	Position	1	S100B+	DAPI+	2152
69536.9	41714.4	8.53053	µm	Spot	Position	1	S100B+	DAPI+	2171
69550.3	41708	9.03566	µm	Spot	Position	1	S100B+	DAPI+	2174
69559	41695.3	8.60926	µm	Spot	Position	1	S100B+	DAPI+	2175
69558.8	41698.1	8.60848	µm	Spot	Position	1	S100B+	DAPI+	2176
69411.6	41770.2	8.82756	µm	Spot	Position	1	S100B+	DAPI+	2180
69437.5	41754.4	8.95276	µm	Spot	Position	1	S100B+	DAPI+	2182
69498.3	41729.1	8.5044	µm	Spot	Position	1	S100B+	DAPI+	2183
69487.3	41736.6	9.14619	µm	Spot	Position	1	S100B+	DAPI+	2185
69489.1	41732.5	9.43039	µm	Spot	Position	1	S100B+	DAPI+	2187
68814.6	41776.2	8.42099	µm	Spot	Position	1	S100B+	DAPI+	2189
68989.1	41778.9	8.53658	µm	Spot	Position	1	S100B+	DAPI+	2190
68973.8	41779.5	8.48364	µm	Spot	Position	1	S100B+	DAPI+	2191
69394.6	41783.1	8.42425	µm	Spot	Position	1	S100B+	DAPI+	2194
69769.1	41677	10.0838	µm	Spot	Position	1	S100B+	DAPI+	2197
68921.3	41761.8	0.1501	µm	Spot	Position	1	S100B-	DAPI+	23
68911.7	41762.5	0.1501	µm	Spot	Position	1	S100B-	DAPI+	24
68918.9	41764.4	0.83413	µm	Spot	Position	1	S100B-	DAPI+	29
68998.5	41777.7	1.10367	µm	Spot	Position	1	S100B-	DAPI+	41
68654.8	41880.7	0.1501	µm	Spot	Position	1	S100B-	DAPI+	49
68665	41894.6	0.1501	µm	Spot	Position	1	S100B-	DAPI+	50
68652.5	41873.9	0.397334	µm	Spot	Position	1	S100B-	DAPI+	51
68650.7	41874.7	0.640411	µm	Spot	Position	1	S100B-	DAPI+	56
68655.1	41876.2	0.747019	µm	Spot	Position	1	S100B-	DAPI+	57
68664.5	41896	0.779637	µm	Spot	Position	1	S100B-	DAPI+	58
68654.3	41875.5	1.12612	µm	Spot	Position	1	S100B-	DAPI+	59
68644.8	41886.5	1.17294	µm	Spot	Position	1	S100B-	DAPI+	60
68837.5	41767.4	1.85729	µm	Spot	Position	1	S100B-	DAPI+	76
68827.6	41773.3	1.97528	µm	Spot	Position	1	S100B-	DAPI+	79
68836.5	41763.1	2.35695	µm	Spot	Position	1	S100B-	DAPI+	83
68892.7	41762.4	1.79614	µm	Spot	Position	1	S100B-	DAPI+	91
68928.1	41765.1	1.40674	µm	Spot	Position	1	S100B-	DAPI+	104
68924.3	41763.7	1.82291	µm	Spot	Position	1	S100B-	DAPI+	110
68930.6	41764.3	1.87155	µm	Spot	Position	1	S100B-	DAPI+	111
68914.9	41761.9	2.26957	µm	Spot	Position	1	S100B-	DAPI+	115
68938.4	41763.9	2.39712	µm	Spot	Position	1	S100B-	DAPI+	116
68926.4	41764.6	2.25622	µm	Spot	Position	1	S100B-	DAPI+	118
68976.5	41770.8	1.97535	µm	Spot	Position	1	S100B-	DAPI+	133
68980.8	41773.4	1.80378	µm	Spot	Position	1	S100B-	DAPI+	134
68764.8	41794.1	1.81213	µm	Spot	Position	1	S100B-	DAPI+	169
68761.3	41795.9	1.82926	µm	Spot	Position	1	S100B-	DAPI+	170
68752.1	41810.5	1.95045	µm	Spot	Position	1	S100B-	DAPI+	173
68741	41816.4	1.93758	µm	Spot	Position	1	S100B-	DAPI+	174
68763.2	41797.8	2.151	µm	Spot	Position	1	S100B-	DAPI+	176
68760.9	41803.7	2.21846	µm	Spot	Position	1	S100B-	DAPI+	177
68754	41808.2	2.34175	µm	Spot	Position	1	S100B-	DAPI+	178
68750.5	41813.1	2.19746	µm	Spot	Position	1	S100B-	DAPI+	179
68789.1	41800.8	1.70891	µm	Spot	Position	1	S100B-	DAPI+	189
68787.4	41801.6	1.73351	µm	Spot	Position	1	S100B-	DAPI+	191
68804	41778.4	1.90329	µm	Spot	Position	1	S100B-	DAPI+	193
68805.2	41779.3	1.9911	µm	Spot	Position	1	S100B-	DAPI+	194
68802.7	41780.4	1.93246	µm	Spot	Position	1	S100B-	DAPI+	195
68783.3	41792.8	1.84249	µm	Spot	Position	1	S100B-	DAPI+	198
68783.5	41795.6	1.84172	µm	Spot	Position	1	S100B-	DAPI+	199
68787	41788.6	2.27075	µm	Spot	Position	1	S100B-	DAPI+	203
68825.6	41774.3	2.02338	µm	Spot	Position	1	S100B-	DAPI+	206
68977.4	41774	1.44763	µm	Spot	Position	1	S100B-	DAPI+	207
68974.2	41774.6	1.95255	µm	Spot	Position	1	S100B-	DAPI+	209
68976.2	41774.9	2.14381	µm	Spot	Position	1	S100B-	DAPI+	210
69004.1	41778.6	1.32716	µm	Spot	Position	1	S100B-	DAPI+	213
69009.9	41780	1.40309	µm	Spot	Position	1	S100B-	DAPI+	214
69035.4	41783.3	1.38662	µm	Spot	Position	1	S100B-	DAPI+	216
69004.3	41779.4	1.7646	µm	Spot	Position	1	S100B-	DAPI+	219
69002.9	41780.4	1.75264	µm	Spot	Position	1	S100B-	DAPI+	221
69036.7	41783.2	1.7132	µm	Spot	Position	1	S100B-	DAPI+	222
69009.7	41780.6	1.98818	µm	Spot	Position	1	S100B-	DAPI+	227
69007	41782.7	1.95686	µm	Spot	Position	1	S100B-	DAPI+	229
69042.1	41782.8	1.92855	µm	Spot	Position	1	S100B-	DAPI+	230
69038.5	41785.9	1.99916	µm	Spot	Position	1	S100B-	DAPI+	231
69059.4	41784.1	1.6361	µm	Spot	Position	1	S100B-	DAPI+	247
69078.2	41786.4	1.61022	µm	Spot	Position	1	S100B-	DAPI+	248
69079	41786.5	1.5714	µm	Spot	Position	1	S100B-	DAPI+	249
69083.6	41781.1	2.0181	µm	Spot	Position	1	S100B-	DAPI+	251
69059.2	41780.9	2.36978	µm	Spot	Position	1	S100B-	DAPI+	266
69061.4	41782.3	2.2016	µm	Spot	Position	1	S100B-	DAPI+	267
69045.5	41782.6	2.32148	µm	Spot	Position	1	S100B-	DAPI+	268
69086.3	41783.1	2.20395	µm	Spot	Position	1	S100B-	DAPI+	269
69081.6	41784.6	2.19629	µm	Spot	Position	1	S100B-	DAPI+	270
69073.6	41785.6	2.30364	µm	Spot	Position	1	S100B-	DAPI+	271
69128.3	41784.1	1.4639	µm	Spot	Position	1	S100B-	DAPI+	272
69102.9	41781.8	2.3049	µm	Spot	Position	1	S100B-	DAPI+	274
69122.8	41783.1	2.21822	µm	Spot	Position	1	S100B-	DAPI+	275
69119.5	41788.1	2.39994	µm	Spot	Position	1	S100B-	DAPI+	277
69259.6	41807.1	2.34468	µm	Spot	Position	1	S100B-	DAPI+	298
69304.8	41801.7	2.26206	µm	Spot	Position	1	S100B-	DAPI+	302
69354.6	41786.8	2.32824	µm	Spot	Position	1	S100B-	DAPI+	312
69376.4	41775.4	2.35382	µm	Spot	Position	1	S100B-	DAPI+	317
68652.3	41851.8	2.07225	µm	Spot	Position	1	S100B-	DAPI+	320
68663.8	41847.5	2.15386	µm	Spot	Position	1	S100B-	DAPI+	323
68665.5	41847.8	2.32983	µm	Spot	Position	1	S100B-	DAPI+	324
68665.5	41849.3	2.28891	µm	Spot	Position	1	S100B-	DAPI+	325
68669.9	41852.5	2.15052	µm	Spot	Position	1	S100B-	DAPI+	326
68672.4	41863.8	2.1104	µm	Spot	Position	1	S100B-	DAPI+	328
68644.5	41864.5	2.3794	µm	Spot	Position	1	S100B-	DAPI+	329
68661.6	41865.5	2.37566	µm	Spot	Position	1	S100B-	DAPI+	330
68678	41853.4	2.34045	µm	Spot	Position	1	S100B-	DAPI+	333
68656.6	41877.6	1.25372	µm	Spot	Position	1	S100B-	DAPI+	339
68650.1	41883.7	1.47423	µm	Spot	Position	1	S100B-	DAPI+	342
68645	41884.5	1.49253	µm	Spot	Position	1	S100B-	DAPI+	343
68660.3	41898.5	1.42045	µm	Spot	Position	1	S100B-	DAPI+	346
68665.1	41870.4	1.67694	µm	Spot	Position	1	S100B-	DAPI+	348
68642	41874	1.62088	µm	Spot	Position	1	S100B-	DAPI+	350
68658	41878.8	1.77794	µm	Spot	Position	1	S100B-	DAPI+	351
68644.1	41879.3	1.69977	µm	Spot	Position	1	S100B-	DAPI+	352
68651.6	41880.7	1.74645	µm	Spot	Position	1	S100B-	DAPI+	353
68654.4	41881	1.63563	µm	Spot	Position	1	S100B-	DAPI+	354
68648	41882.2	1.74319	µm	Spot	Position	1	S100B-	DAPI+	355
68646.8	41884.9	1.57819	µm	Spot	Position	1	S100B-	DAPI+	357
68647.2	41867.3	2.01122	µm	Spot	Position	1	S100B-	DAPI+	360
68657.1	41870.9	1.8524	µm	Spot	Position	1	S100B-	DAPI+	361
68641.7	41888.1	1.87738	µm	Spot	Position	1	S100B-	DAPI+	368
68652.5	41877.4	2.23219	µm	Spot	Position	1	S100B-	DAPI+	379
68647.1	41897.7	2.24868	µm	Spot	Position	1	S100B-	DAPI+	382
69694.1	41230.2	2.91199	µm	Spot	Position	1	S100B-	DAPI+	384
69764	41638.3	3.4013	µm	Spot	Position	1	S100B-	DAPI+	389
69484.6	41722.9	3.26291	µm	Spot	Position	1	S100B-	DAPI+	390
69483.9	41722.9	3.24524	µm	Spot	Position	1	S100B-	DAPI+	391
69522.6	41717.6	3.41458	µm	Spot	Position	1	S100B-	DAPI+	421
68805.7	41772.7	3.36155	µm	Spot	Position	1	S100B-	DAPI+	425
68840.1	41765.6	2.66625	µm	Spot	Position	1	S100B-	DAPI+	429
68844.5	41764.3	2.79772	µm	Spot	Position	1	S100B-	DAPI+	431
68858	41756.3	3.27606	µm	Spot	Position	1	S100B-	DAPI+	435
68822	41768.7	3.0702	µm	Spot	Position	1	S100B-	DAPI+	439
68950.7	41766.3	2.96677	µm	Spot	Position	1	S100B-	DAPI+	457
68943.5	41764.1	3.44337	µm	Spot	Position	1	S100B-	DAPI+	464
68965.5	41771.2	2.5592	µm	Spot	Position	1	S100B-	DAPI+	471
68962.3	41769.6	2.87859	µm	Spot	Position	1	S100B-	DAPI+	474
68967.1	41771.2	2.76367	µm	Spot	Position	1	S100B-	DAPI+	475
68985.8	41772.1	3.18542	µm	Spot	Position	1	S100B-	DAPI+	481
68963.3	41770.1	3.35729	µm	Spot	Position	1	S100B-	DAPI+	486
69393.6	41772.4	2.96112	µm	Spot	Position	1	S100B-	DAPI+	498
69394.5	41772.4	2.8826	µm	Spot	Position	1	S100B-	DAPI+	499
69378.9	41772.8	3.0236	µm	Spot	Position	1	S100B-	DAPI+	503
69379.2	41773.4	3.12461	µm	Spot	Position	1	S100B-	DAPI+	504
69395.5	41768.6	3.45091	µm	Spot	Position	1	S100B-	DAPI+	509
69392.9	41771.4	3.5193	µm	Spot	Position	1	S100B-	DAPI+	510
69435.7	41756.2	2.55291	µm	Spot	Position	1	S100B-	DAPI+	513
69446.7	41750.2	3.06048	µm	Spot	Position	1	S100B-	DAPI+	525
69429.6	41757.2	3.15848	µm	Spot	Position	1	S100B-	DAPI+	531
69423.6	41758.5	3.46319	µm	Spot	Position	1	S100B-	DAPI+	536
69464.1	41739.1	2.8172	µm	Spot	Position	1	S100B-	DAPI+	539
69469.6	41736	3.19355	µm	Spot	Position	1	S100B-	DAPI+	541
69466.4	41737.1	3.12458	µm	Spot	Position	1	S100B-	DAPI+	542
69476.1	41739.5	3.15213	µm	Spot	Position	1	S100B-	DAPI+	543
69460.1	41740.4	3.10657	µm	Spot	Position	1	S100B-	DAPI+	544
69475.3	41737.6	3.43368	µm	Spot	Position	1	S100B-	DAPI+	552
69464.5	41737.9	3.32671	µm	Spot	Position	1	S100B-	DAPI+	554
69468	41739.2	3.59173	µm	Spot	Position	1	S100B-	DAPI+	556
69474.4	41740.1	3.30832	µm	Spot	Position	1	S100B-	DAPI+	557
68759.3	41807.3	2.46634	µm	Spot	Position	1	S100B-	DAPI+	562
68751	41809.3	2.59656	µm	Spot	Position	1	S100B-	DAPI+	563
68738.5	41816	2.47964	µm	Spot	Position	1	S100B-	DAPI+	565
68762.4	41799.5	2.83724	µm	Spot	Position	1	S100B-	DAPI+	567
68743.8	41813.9	2.84196	µm	Spot	Position	1	S100B-	DAPI+	569
68749.3	41802.2	3.19748	µm	Spot	Position	1	S100B-	DAPI+	571
68804.5	41777.9	2.67242	µm	Spot	Position	1	S100B-	DAPI+	577
68788.8	41791.7	2.40689	µm	Spot	Position	1	S100B-	DAPI+	581
68802.9	41775.8	2.83154	µm	Spot	Position	1	S100B-	DAPI+	584
68806.5	41778.5	2.78787	µm	Spot	Position	1	S100B-	DAPI+	585
68805.2	41777.3	3.44358	µm	Spot	Position	1	S100B-	DAPI+	602
68780	41790.4	3.59933	µm	Spot	Position	1	S100B-	DAPI+	603
68823.4	41776.3	3.15016	µm	Spot	Position	1	S100B-	DAPI+	608
68978.4	41775.2	2.50576	µm	Spot	Position	1	S100B-	DAPI+	609
68995.1	41780.4	3.30046	µm	Spot	Position	1	S100B-	DAPI+	612
69036.3	41778.8	2.95043	µm	Spot	Position	1	S100B-	DAPI+	626
69005.3	41782.5	2.76414	µm	Spot	Position	1	S100B-	DAPI+	628
69013.2	41777	3.10837	µm	Spot	Position	1	S100B-	DAPI+	634
69022.9	41781.8	3.14952	µm	Spot	Position	1	S100B-	DAPI+	637
69024.9	41781.9	3.09793	µm	Spot	Position	1	S100B-	DAPI+	638
69027.8	41782.3	3.17749	µm	Spot	Position	1	S100B-	DAPI+	639
69058.5	41781.1	2.58835	µm	Spot	Position	1	S100B-	DAPI+	645
69065.5	41781.6	2.51294	µm	Spot	Position	1	S100B-	DAPI+	647
69068.9	41783.3	2.65943	µm	Spot	Position	1	S100B-	DAPI+	648
69077.2	41783.9	2.42157	µm	Spot	Position	1	S100B-	DAPI+	649
69085	41785.2	2.6473	µm	Spot	Position	1	S100B-	DAPI+	650
69051.6	41783.5	2.94715	µm	Spot	Position	1	S100B-	DAPI+	657
69048.9	41783.9	2.7329	µm	Spot	Position	1	S100B-	DAPI+	658
69082.3	41788.1	2.7686	µm	Spot	Position	1	S100B-	DAPI+	660
69058	41782.9	3.24094	µm	Spot	Position	1	S100B-	DAPI+	663
69053.4	41783.3	3.18233	µm	Spot	Position	1	S100B-	DAPI+	664
69100.5	41784.3	2.52567	µm	Spot	Position	1	S100B-	DAPI+	671
69120.3	41784.8	2.55978	µm	Spot	Position	1	S100B-	DAPI+	672
69131.6	41787.9	2.63255	µm	Spot	Position	1	S100B-	DAPI+	678
69131.4	41786.2	3.24362	µm	Spot	Position	1	S100B-	DAPI+	683
69131.7	41785.4	3.52182	µm	Spot	Position	1	S100B-	DAPI+	688
69129.1	41785.8	3.40894	µm	Spot	Position	1	S100B-	DAPI+	689
69159.6	41788	2.57226	µm	Spot	Position	1	S100B-	DAPI+	699
69140	41789.6	2.92829	µm	Spot	Position	1	S100B-	DAPI+	709
69167.8	41787.4	3.07003	µm	Spot	Position	1	S100B-	DAPI+	717
69142.2	41788.9	3.03662	µm	Spot	Position	1	S100B-	DAPI+	719
69146.1	41789.6	3.24072	µm	Spot	Position	1	S100B-	DAPI+	721
69168.7	41790.2	3.04998	µm	Spot	Position	1	S100B-	DAPI+	722
69172.7	41791.5	3.2819	µm	Spot	Position	1	S100B-	DAPI+	723
69178.8	41788	3.3096	µm	Spot	Position	1	S100B-	DAPI+	734
69140.6	41792.3	3.50972	µm	Spot	Position	1	S100B-	DAPI+	738
69214.6	41791.6	2.66497	µm	Spot	Position	1	S100B-	DAPI+	745
69192.4	41786.6	2.79922	µm	Spot	Position	1	S100B-	DAPI+	753
69188.6	41789.8	2.99701	µm	Spot	Position	1	S100B-	DAPI+	755
69216.7	41790.8	2.85355	µm	Spot	Position	1	S100B-	DAPI+	756
69209.8	41791.4	2.89727	µm	Spot	Position	1	S100B-	DAPI+	757
69214.6	41793.3	2.7613	µm	Spot	Position	1	S100B-	DAPI+	759
69216.9	41795.1	2.86669	µm	Spot	Position	1	S100B-	DAPI+	760
69195.2	41787.2	3.12258	µm	Spot	Position	1	S100B-	DAPI+	767
69189.8	41787.7	3.05894	µm	Spot	Position	1	S100B-	DAPI+	768
69186.2	41788.3	3.06027	µm	Spot	Position	1	S100B-	DAPI+	769
69187.1	41789.8	3.25017	µm	Spot	Position	1	S100B-	DAPI+	770
69189.2	41790.5	3.07354	µm	Spot	Position	1	S100B-	DAPI+	772
69216.9	41792.1	3.06847	µm	Spot	Position	1	S100B-	DAPI+	773
69217	41793.4	3.06374	µm	Spot	Position	1	S100B-	DAPI+	774
69211.4	41794.2	3.2374	µm	Spot	Position	1	S100B-	DAPI+	775
69221.5	41797.3	3.17117	µm	Spot	Position	1	S100B-	DAPI+	778
69225.4	41797.3	3.09388	µm	Spot	Position	1	S100B-	DAPI+	779
69227.8	41797.4	3.234	µm	Spot	Position	1	S100B-	DAPI+	780
69200.5	41790.6	3.3517	µm	Spot	Position	1	S100B-	DAPI+	787
69220.1	41794.3	3.49532	µm	Spot	Position	1	S100B-	DAPI+	789
69216.9	41795.9	3.52032	µm	Spot	Position	1	S100B-	DAPI+	791
69226.9	41795.8	3.47567	µm	Spot	Position	1	S100B-	DAPI+	792
69231.3	41800.4	2.66361	µm	Spot	Position	1	S100B-	DAPI+	795
69230	41799.7	2.8345	µm	Spot	Position	1	S100B-	DAPI+	802
69254.3	41804.4	2.97371	µm	Spot	Position	1	S100B-	DAPI+	803
69253.1	41803.4	3.25579	µm	Spot	Position	1	S100B-	DAPI+	811
69258.1	41805.4	3.03185	µm	Spot	Position	1	S100B-	DAPI+	812
69235.1	41792.8	3.36069	µm	Spot	Position	1	S100B-	DAPI+	816
69230	41798.4	3.34242	µm	Spot	Position	1	S100B-	DAPI+	817
69265	41800.5	3.43877	µm	Spot	Position	1	S100B-	DAPI+	818
69255.5	41804.5	3.41638	µm	Spot	Position	1	S100B-	DAPI+	821
69317.6	41790.1	2.66697	µm	Spot	Position	1	S100B-	DAPI+	822
69316.8	41792.1	2.68002	µm	Spot	Position	1	S100B-	DAPI+	823
69309.4	41800.9	2.53959	µm	Spot	Position	1	S100B-	DAPI+	824
69303.4	41801.1	2.68267	µm	Spot	Position	1	S100B-	DAPI+	825
69306.6	41805	2.41501	µm	Spot	Position	1	S100B-	DAPI+	826
69309.7	41803.2	2.9486	µm	Spot	Position	1	S100B-	DAPI+	828
69308.2	41798.6	3.05211	µm	Spot	Position	1	S100B-	DAPI+	829
69314.2	41798.8	3.49473	µm	Spot	Position	1	S100B-	DAPI+	832
69309.3	41799.2	3.40336	µm	Spot	Position	1	S100B-	DAPI+	833
69304.7	41805.9	3.4157	µm	Spot	Position	1	S100B-	DAPI+	835
69301.9	41806.1	3.504	µm	Spot	Position	1	S100B-	DAPI+	836
69300.2	41806.7	3.60154	µm	Spot	Position	1	S100B-	DAPI+	837
69340.4	41781.8	2.42771	µm	Spot	Position	1	S100B-	DAPI+	846
69362.9	41784.3	3.03646	µm	Spot	Position	1	S100B-	DAPI+	855
69338.4	41785	3.27335	µm	Spot	Position	1	S100B-	DAPI+	856
69362.9	41776.8	3.45284	µm	Spot	Position	1	S100B-	DAPI+	857
69379.9	41776.6	2.45689	µm	Spot	Position	1	S100B-	DAPI+	865
69376.3	41779	2.58608	µm	Spot	Position	1	S100B-	DAPI+	867
69374.7	41779.9	2.42305	µm	Spot	Position	1	S100B-	DAPI+	868
69383.8	41779.8	2.57329	µm	Spot	Position	1	S100B-	DAPI+	869
69372.4	41780.1	2.50975	µm	Spot	Position	1	S100B-	DAPI+	870
69379.7	41774.6	2.86241	µm	Spot	Position	1	S100B-	DAPI+	872
69395.4	41775.6	2.76658	µm	Spot	Position	1	S100B-	DAPI+	873
69382.8	41779.2	2.79756	µm	Spot	Position	1	S100B-	DAPI+	874
69396.1	41774	3.098	µm	Spot	Position	1	S100B-	DAPI+	875
69377.2	41778.4	3.09184	µm	Spot	Position	1	S100B-	DAPI+	876
69384.1	41779.2	3.15681	µm	Spot	Position	1	S100B-	DAPI+	877
69381.6	41779.6	3.27347	µm	Spot	Position	1	S100B-	DAPI+	878
69380	41775	3.44897	µm	Spot	Position	1	S100B-	DAPI+	879
69393.7	41776.6	3.411	µm	Spot	Position	1	S100B-	DAPI+	880
69367.5	41778.2	3.43788	µm	Spot	Position	1	S100B-	DAPI+	883
69395.2	41778.2	3.54574	µm	Spot	Position	1	S100B-	DAPI+	884
69381.4	41781.2	3.39199	µm	Spot	Position	1	S100B-	DAPI+	885
68670.4	41853.6	2.59861	µm	Spot	Position	1	S100B-	DAPI+	886
68657	41861.9	2.55111	µm	Spot	Position	1	S100B-	DAPI+	887
68646.1	41862.4	2.60965	µm	Spot	Position	1	S100B-	DAPI+	888
68667.6	41859.2	2.81267	µm	Spot	Position	1	S100B-	DAPI+	892
68642.9	41856	3.37472	µm	Spot	Position	1	S100B-	DAPI+	897
68668.9	41858.9	3.3682	µm	Spot	Position	1	S100B-	DAPI+	898
68672	41865.9	3.51927	µm	Spot	Position	1	S100B-	DAPI+	899
68682.8	41858.1	2.97874	µm	Spot	Position	1	S100B-	DAPI+	900
68709.5	41836.4	3.20641	µm	Spot	Position	1	S100B-	DAPI+	903
68644.2	41866.8	2.55024	µm	Spot	Position	1	S100B-	DAPI+	911
68643	41889.1	2.41356	µm	Spot	Position	1	S100B-	DAPI+	919
68661.6	41873.9	2.78265	µm	Spot	Position	1	S100B-	DAPI+	926
68650.7	41885.9	2.89314	µm	Spot	Position	1	S100B-	DAPI+	931
68648.3	41868.8	3.10872	µm	Spot	Position	1	S100B-	DAPI+	938
68639.1	41878.7	3.00382	µm	Spot	Position	1	S100B-	DAPI+	941
68641.9	41883.7	3.04929	µm	Spot	Position	1	S100B-	DAPI+	943
69482.9	41723.4	3.66696	µm	Spot	Position	1	S100B-	DAPI+	952
69484.9	41723.4	4.04142	µm	Spot	Position	1	S100B-	DAPI+	956
69482.3	41726.9	4.03495	µm	Spot	Position	1	S100B-	DAPI+	957
69486.1	41720.2	4.73219	µm	Spot	Position	1	S100B-	DAPI+	963
69517.2	41721.6	3.71375	µm	Spot	Position	1	S100B-	DAPI+	976
69557.9	41698.3	3.68393	µm	Spot	Position	1	S100B-	DAPI+	996
69572.6	41689.2	4.00316	µm	Spot	Position	1	S100B-	DAPI+	997
69574.8	41691	4.09526	µm	Spot	Position	1	S100B-	DAPI+	998
69573.7	41687.1	4.60329	µm	Spot	Position	1	S100B-	DAPI+	1002
68854.4	41760	4.2665	µm	Spot	Position	1	S100B-	DAPI+	1008
68933	41761.8	3.66915	µm	Spot	Position	1	S100B-	DAPI+	1020
68922.5	41759.6	4.39949	µm	Spot	Position	1	S100B-	DAPI+	1029
68960.9	41770.1	3.77917	µm	Spot	Position	1	S100B-	DAPI+	1036
69394.8	41766.4	3.69764	µm	Spot	Position	1	S100B-	DAPI+	1046
69384	41772.8	3.93973	µm	Spot	Position	1	S100B-	DAPI+	1051
69390.4	41767.7	4.37213	µm	Spot	Position	1	S100B-	DAPI+	1054
69396.2	41769.1	4.36138	µm	Spot	Position	1	S100B-	DAPI+	1055
69383.8	41770.8	4.70006	µm	Spot	Position	1	S100B-	DAPI+	1057
69454.5	41743.6	4.04549	µm	Spot	Position	1	S100B-	DAPI+	1066
69447.6	41746.8	4.02362	µm	Spot	Position	1	S100B-	DAPI+	1068
69449	41750.3	3.98596	µm	Spot	Position	1	S100B-	DAPI+	1069
69430.1	41758.6	4.15489	µm	Spot	Position	1	S100B-	DAPI+	1070
69449	41748.9	4.25811	µm	Spot	Position	1	S100B-	DAPI+	1074
69438.1	41749.7	4.45012	µm	Spot	Position	1	S100B-	DAPI+	1075
69449.3	41744.9	4.52267	µm	Spot	Position	1	S100B-	DAPI+	1084
69444.8	41749.1	4.5264	µm	Spot	Position	1	S100B-	DAPI+	1085
69422.3	41760.3	4.55511	µm	Spot	Position	1	S100B-	DAPI+	1089
69480.7	41730.2	4.04891	µm	Spot	Position	1	S100B-	DAPI+	1094
69480.7	41738.1	4.37768	µm	Spot	Position	1	S100B-	DAPI+	1101
69480.3	41731	4.5756	µm	Spot	Position	1	S100B-	DAPI+	1102
69475.5	41732.9	4.78146	µm	Spot	Position	1	S100B-	DAPI+	1104
69477.8	41736.9	4.52714	µm	Spot	Position	1	S100B-	DAPI+	1107
68759.9	41797	4.12225	µm	Spot	Position	1	S100B-	DAPI+	1114
68756.8	41798.8	4.4971	µm	Spot	Position	1	S100B-	DAPI+	1121
68760.7	41803.1	4.36604	µm	Spot	Position	1	S100B-	DAPI+	1123
68750.1	41803.4	4.4461	µm	Spot	Position	1	S100B-	DAPI+	1124
68782.9	41786.7	3.88939	µm	Spot	Position	1	S100B-	DAPI+	1132
68804.1	41773.9	4.00352	µm	Spot	Position	1	S100B-	DAPI+	1137
68804.8	41776.1	4.04647	µm	Spot	Position	1	S100B-	DAPI+	1138
68795.2	41784.7	4.06371	µm	Spot	Position	1	S100B-	DAPI+	1139
68790.2	41785.9	4.15002	µm	Spot	Position	1	S100B-	DAPI+	1140
68786.2	41786.3	4.46894	µm	Spot	Position	1	S100B-	DAPI+	1144
68809.2	41775.6	4.61098	µm	Spot	Position	1	S100B-	DAPI+	1146
68791.3	41784.1	4.66452	µm	Spot	Position	1	S100B-	DAPI+	1150
68781.6	41796.9	4.50611	µm	Spot	Position	1	S100B-	DAPI+	1152
68775.6	41801	4.71404	µm	Spot	Position	1	S100B-	DAPI+	1153
68984.7	41776.3	4.57069	µm	Spot	Position	1	S100B-	DAPI+	1162
69088.5	41784	3.68652	µm	Spot	Position	1	S100B-	DAPI+	1173
69083.5	41782.9	4.53746	µm	Spot	Position	1	S100B-	DAPI+	1179
69103.8	41781.2	4.75105	µm	Spot	Position	1	S100B-	DAPI+	1187
69144.8	41786.1	3.62329	µm	Spot	Position	1	S100B-	DAPI+	1193
69140.6	41786.6	3.76179	µm	Spot	Position	1	S100B-	DAPI+	1195
69163.1	41787	3.76198	µm	Spot	Position	1	S100B-	DAPI+	1196
69158.2	41791.4	3.87821	µm	Spot	Position	1	S100B-	DAPI+	1200
69161.9	41793	3.69767	µm	Spot	Position	1	S100B-	DAPI+	1203
69172.1	41789.2	4.0829	µm	Spot	Position	1	S100B-	DAPI+	1209
69165.9	41791.9	3.96893	µm	Spot	Position	1	S100B-	DAPI+	1211
69181.7	41788.5	4.47495	µm	Spot	Position	1	S100B-	DAPI+	1220
69162.8	41793.3	4.34651	µm	Spot	Position	1	S100B-	DAPI+	1222
69195.5	41784.5	3.83574	µm	Spot	Position	1	S100B-	DAPI+	1236
69183.8	41789.6	3.7694	µm	Spot	Position	1	S100B-	DAPI+	1242
69217.1	41789.9	3.81728	µm	Spot	Position	1	S100B-	DAPI+	1243
69198.8	41791	3.81566	µm	Spot	Position	1	S100B-	DAPI+	1245
69187.4	41791.9	3.67763	µm	Spot	Position	1	S100B-	DAPI+	1246
69202.3	41791.9	3.70223	µm	Spot	Position	1	S100B-	DAPI+	1247
69225.8	41798.4	3.84179	µm	Spot	Position	1	S100B-	DAPI+	1249
69224.4	41798.8	3.62751	µm	Spot	Position	1	S100B-	DAPI+	1250
69198.2	41788.5	4.03066	µm	Spot	Position	1	S100B-	DAPI+	1259
69202.9	41793.1	4.09661	µm	Spot	Position	1	S100B-	DAPI+	1263
69197.8	41793.7	4.05526	µm	Spot	Position	1	S100B-	DAPI+	1264
69200	41789.1	4.30913	µm	Spot	Position	1	S100B-	DAPI+	1269
69193.9	41794.1	4.38277	µm	Spot	Position	1	S100B-	DAPI+	1272
69198.7	41794.2	4.25558	µm	Spot	Position	1	S100B-	DAPI+	1273
69203.5	41795.4	4.4361	µm	Spot	Position	1	S100B-	DAPI+	1274
69212.1	41796.8	4.33325	µm	Spot	Position	1	S100B-	DAPI+	1275
69204.6	41791.2	4.75378	µm	Spot	Position	1	S100B-	DAPI+	1280
69201.9	41793.2	4.76814	µm	Spot	Position	1	S100B-	DAPI+	1282
69186.8	41796.1	4.7993	µm	Spot	Position	1	S100B-	DAPI+	1283
69223.3	41800.4	4.66831	µm	Spot	Position	1	S100B-	DAPI+	1285
69251.3	41804	3.84923	µm	Spot	Position	1	S100B-	DAPI+	1292
69253.5	41804.3	3.65861	µm	Spot	Position	1	S100B-	DAPI+	1293
69257.9	41807.1	3.83254	µm	Spot	Position	1	S100B-	DAPI+	1294
69242.6	41798.5	3.99042	µm	Spot	Position	1	S100B-	DAPI+	1298
69230.7	41804	4.08565	µm	Spot	Position	1	S100B-	DAPI+	1301
69234.1	41794.7	4.43016	µm	Spot	Position	1	S100B-	DAPI+	1303
69239.6	41799.7	4.21	µm	Spot	Position	1	S100B-	DAPI+	1304
69228.5	41797.8	4.76098	µm	Spot	Position	1	S100B-	DAPI+	1308
69312.4	41798.8	3.69136	µm	Spot	Position	1	S100B-	DAPI+	1319
69293.5	41802.7	3.74274	µm	Spot	Position	1	S100B-	DAPI+	1321
69292.4	41804.1	3.67587	µm	Spot	Position	1	S100B-	DAPI+	1323
69295.4	41805.7	3.76924	µm	Spot	Position	1	S100B-	DAPI+	1324
69298.9	41805.5	3.83838	µm	Spot	Position	1	S100B-	DAPI+	1325
69304.4	41806.6	3.8138	µm	Spot	Position	1	S100B-	DAPI+	1327
69319.9	41789.3	3.91006	µm	Spot	Position	1	S100B-	DAPI+	1329
69312.1	41795.8	3.91557	µm	Spot	Position	1	S100B-	DAPI+	1330
69306.1	41796.3	3.93024	µm	Spot	Position	1	S100B-	DAPI+	1331
69295.5	41803	4.07243	µm	Spot	Position	1	S100B-	DAPI+	1334
69318.5	41796.4	4.66552	µm	Spot	Position	1	S100B-	DAPI+	1343
69291.4	41803.9	4.65154	µm	Spot	Position	1	S100B-	DAPI+	1348
69287.5	41805.6	4.61241	µm	Spot	Position	1	S100B-	DAPI+	1349
69287.7	41807.2	4.7215	µm	Spot	Position	1	S100B-	DAPI+	1350
69322.5	41795.8	3.70102	µm	Spot	Position	1	S100B-	DAPI+	1352
69356.5	41789	4.02579	µm	Spot	Position	1	S100B-	DAPI+	1359
69337.1	41789.5	3.94487	µm	Spot	Position	1	S100B-	DAPI+	1360
69332.6	41789.9	4.06308	µm	Spot	Position	1	S100B-	DAPI+	1361
69338.1	41790.2	4.07718	µm	Spot	Position	1	S100B-	DAPI+	1362
69348.9	41790.3	4.21085	µm	Spot	Position	1	S100B-	DAPI+	1368
69359.1	41790.4	4.29585	µm	Spot	Position	1	S100B-	DAPI+	1369
69338.8	41791.1	4.38548	µm	Spot	Position	1	S100B-	DAPI+	1370
69326.1	41783.8	4.56466	µm	Spot	Position	1	S100B-	DAPI+	1374
69363.5	41792.1	4.79464	µm	Spot	Position	1	S100B-	DAPI+	1376
69362.2	41792.4	4.75442	µm	Spot	Position	1	S100B-	DAPI+	1377
69365.3	41792.9	4.75594	µm	Spot	Position	1	S100B-	DAPI+	1378
69335.5	41795.5	4.61355	µm	Spot	Position	1	S100B-	DAPI+	1379
69392	41774.6	3.73025	µm	Spot	Position	1	S100B-	DAPI+	1381
69392.2	41775.8	3.76306	µm	Spot	Position	1	S100B-	DAPI+	1382
69394.9	41779.7	3.64218	µm	Spot	Position	1	S100B-	DAPI+	1383
69379.9	41782.6	4.13627	µm	Spot	Position	1	S100B-	DAPI+	1386
69386.2	41781.5	4.36323	µm	Spot	Position	1	S100B-	DAPI+	1387
69380.9	41774.1	4.65441	µm	Spot	Position	1	S100B-	DAPI+	1388
69392.5	41778.1	4.69014	µm	Spot	Position	1	S100B-	DAPI+	1389
69390.4	41779.8	4.65331	µm	Spot	Position	1	S100B-	DAPI+	1390
69388.8	41780.8	4.63152	µm	Spot	Position	1	S100B-	DAPI+	1391
69380.1	41783.3	4.64798	µm	Spot	Position	1	S100B-	DAPI+	1392
68644.6	41860.3	3.69411	µm	Spot	Position	1	S100B-	DAPI+	1395
68669.3	41844.3	4.12176	µm	Spot	Position	1	S100B-	DAPI+	1396
68658.6	41864.4	4.01229	µm	Spot	Position	1	S100B-	DAPI+	1399
68668.1	41859.7	4.38098	µm	Spot	Position	1	S100B-	DAPI+	1401
68681.3	41843.2	4.17312	µm	Spot	Position	1	S100B-	DAPI+	1407
68652.5	41885.3	3.95062	µm	Spot	Position	1	S100B-	DAPI+	1429
68653.8	41898	4.00832	µm	Spot	Position	1	S100B-	DAPI+	1431
69722.6	41246.3	5.73731	µm	Spot	Position	1	S100B-	DAPI+	1445
69764.9	41367.5	4.93075	µm	Spot	Position	1	S100B-	DAPI+	1453
69764.4	41370.3	5.31942	µm	Spot	Position	1	S100B-	DAPI+	1454
69767.5	41376.1	5.68389	µm	Spot	Position	1	S100B-	DAPI+	1456
69483.6	41719.7	4.92205	µm	Spot	Position	1	S100B-	DAPI+	1462
69479.4	41727.3	4.8473	µm	Spot	Position	1	S100B-	DAPI+	1463
69482	41721.4	5.30937	µm	Spot	Position	1	S100B-	DAPI+	1464
69487.2	41721.3	5.28719	µm	Spot	Position	1	S100B-	DAPI+	1465
69486	41726.1	5.25096	µm	Spot	Position	1	S100B-	DAPI+	1466
69501.6	41723.9	5.58615	µm	Spot	Position	1	S100B-	DAPI+	1468
69557.3	41702	5.04626	µm	Spot	Position	1	S100B-	DAPI+	1484
69556.5	41704.2	5.05428	µm	Spot	Position	1	S100B-	DAPI+	1485
69558.3	41706.7	5.05268	µm	Spot	Position	1	S100B-	DAPI+	1486
69577.7	41691.2	5.34253	µm	Spot	Position	1	S100B-	DAPI+	1487
69556.3	41696.5	5.9127	µm	Spot	Position	1	S100B-	DAPI+	1490
68833.7	41765.9	5.63359	µm	Spot	Position	1	S100B-	DAPI+	1495
68826.8	41766.6	5.80094	µm	Spot	Position	1	S100B-	DAPI+	1497
68990.4	41773	5.76744	µm	Spot	Position	1	S100B-	DAPI+	1511
69005.6	41772.9	5.60185	µm	Spot	Position	1	S100B-	DAPI+	1512
69456.8	41740.4	4.99725	µm	Spot	Position	1	S100B-	DAPI+	1524
69441.4	41748.3	4.97642	µm	Spot	Position	1	S100B-	DAPI+	1527
69443	41753	4.93545	µm	Spot	Position	1	S100B-	DAPI+	1528
69418.5	41761.5	5.22321	µm	Spot	Position	1	S100B-	DAPI+	1531
69450.6	41746.2	5.73657	µm	Spot	Position	1	S100B-	DAPI+	1537
69478.8	41730.9	5.37081	µm	Spot	Position	1	S100B-	DAPI+	1540
69479.3	41734.7	5.22898	µm	Spot	Position	1	S100B-	DAPI+	1542
69461.5	41744.4	5.37502	µm	Spot	Position	1	S100B-	DAPI+	1543
69474.7	41734	5.66655	µm	Spot	Position	1	S100B-	DAPI+	1545
69478.3	41737.1	5.64348	µm	Spot	Position	1	S100B-	DAPI+	1546
68764.3	41798	5.08878	µm	Spot	Position	1	S100B-	DAPI+	1551
68798.5	41777.8	5.48174	µm	Spot	Position	1	S100B-	DAPI+	1561
68766.5	41815.2	5.58752	µm	Spot	Position	1	S100B-	DAPI+	1562
68780.8	41794.5	5.80486	µm	Spot	Position	1	S100B-	DAPI+	1564
68769	41797.2	5.99942	µm	Spot	Position	1	S100B-	DAPI+	1565
69018.6	41778.5	5.09138	µm	Spot	Position	1	S100B-	DAPI+	1576
69106.7	41779.3	5.3272	µm	Spot	Position	1	S100B-	DAPI+	1592
69142.2	41793.8	4.97687	µm	Spot	Position	1	S100B-	DAPI+	1602
69223.7	41801.1	4.90039	µm	Spot	Position	1	S100B-	DAPI+	1619
69203.8	41790.4	5.27945	µm	Spot	Position	1	S100B-	DAPI+	1621
69197.4	41796.8	5.3011	µm	Spot	Position	1	S100B-	DAPI+	1622
69226.9	41798.7	5.4179	µm	Spot	Position	1	S100B-	DAPI+	1626
69250	41805.2	4.84075	µm	Spot	Position	1	S100B-	DAPI+	1636
69258.6	41801.5	5.2769	µm	Spot	Position	1	S100B-	DAPI+	1640
69228.8	41803.7	5.20962	µm	Spot	Position	1	S100B-	DAPI+	1642
69242.8	41802.7	5.56502	µm	Spot	Position	1	S100B-	DAPI+	1649
69285.3	41801.4	4.99144	µm	Spot	Position	1	S100B-	DAPI+	1659
69298.1	41801.9	4.87667	µm	Spot	Position	1	S100B-	DAPI+	1660
69295.5	41802.3	4.93815	µm	Spot	Position	1	S100B-	DAPI+	1661
69284.5	41804.3	5.02474	µm	Spot	Position	1	S100B-	DAPI+	1662
69314.5	41797.7	5.485	µm	Spot	Position	1	S100B-	DAPI+	1670
69304.2	41798.2	5.4134	µm	Spot	Position	1	S100B-	DAPI+	1672
69318.2	41800	5.63183	µm	Spot	Position	1	S100B-	DAPI+	1675
69283.7	41802.9	5.48416	µm	Spot	Position	1	S100B-	DAPI+	1676
69311.3	41795.5	5.77289	µm	Spot	Position	1	S100B-	DAPI+	1679
69300.1	41800.6	5.83137	µm	Spot	Position	1	S100B-	DAPI+	1681
69342	41780.5	5.09569	µm	Spot	Position	1	S100B-	DAPI+	1684
69365.1	41789.8	5.30957	µm	Spot	Position	1	S100B-	DAPI+	1693
69356.1	41791.8	5.10666	µm	Spot	Position	1	S100B-	DAPI+	1694
69360.2	41792.6	5.17341	µm	Spot	Position	1	S100B-	DAPI+	1695
69366.5	41792.5	5.15133	µm	Spot	Position	1	S100B-	DAPI+	1696
69366.5	41797.4	5.12553	µm	Spot	Position	1	S100B-	DAPI+	1697
69365.5	41798.1	5.39327	µm	Spot	Position	1	S100B-	DAPI+	1698
69357.9	41793.9	5.57465	µm	Spot	Position	1	S100B-	DAPI+	1700
69364.2	41784.2	5.76098	µm	Spot	Position	1	S100B-	DAPI+	1701
69340.4	41785.5	5.91991	µm	Spot	Position	1	S100B-	DAPI+	1703
69385.6	41783.2	4.91537	µm	Spot	Position	1	S100B-	DAPI+	1710
69373.1	41785.4	5.00549	µm	Spot	Position	1	S100B-	DAPI+	1711
69368.4	41794.1	5.00816	µm	Spot	Position	1	S100B-	DAPI+	1712
69389.8	41782.5	5.33475	µm	Spot	Position	1	S100B-	DAPI+	1713
69390.9	41780.7	5.46092	µm	Spot	Position	1	S100B-	DAPI+	1714
69366.9	41780.9	5.57468	µm	Spot	Position	1	S100B-	DAPI+	1715
69367.7	41787.9	5.91286	µm	Spot	Position	1	S100B-	DAPI+	1717
69368	41790.2	5.89645	µm	Spot	Position	1	S100B-	DAPI+	1718
68653	41857.5	5.26824	µm	Spot	Position	1	S100B-	DAPI+	1726
68644	41866	5.26713	µm	Spot	Position	1	S100B-	DAPI+	1727
68706.5	41846.3	4.92327	µm	Spot	Position	1	S100B-	DAPI+	1731
68679.9	41854.3	5.05506	µm	Spot	Position	1	S100B-	DAPI+	1732
68740.8	41823.8	5.22801	µm	Spot	Position	1	S100B-	DAPI+	1737
68659.1	41876.7	5.63174	µm	Spot	Position	1	S100B-	DAPI+	1746
68648.1	41889.1	5.91772	µm	Spot	Position	1	S100B-	DAPI+	1750
69767	41372	6.11558	µm	Spot	Position	1	S100B-	DAPI+	1759
69766.8	41375.1	6.51863	µm	Spot	Position	1	S100B-	DAPI+	1761
69767.9	41385.2	6.35697	µm	Spot	Position	1	S100B-	DAPI+	1762
69769.3	41380.8	7.07717	µm	Spot	Position	1	S100B-	DAPI+	1765
69764.4	41636.4	6.26702	µm	Spot	Position	1	S100B-	DAPI+	1773
69495.6	41725	6.28817	µm	Spot	Position	1	S100B-	DAPI+	1777
69529.8	41716.4	6.14595	µm	Spot	Position	1	S100B-	DAPI+	1785
69517.8	41717.6	6.0956	µm	Spot	Position	1	S100B-	DAPI+	1786
69532.8	41713.6	6.38328	µm	Spot	Position	1	S100B-	DAPI+	1788
69578	41688.8	6.05715	µm	Spot	Position	1	S100B-	DAPI+	1798
69576.1	41689.5	6.15224	µm	Spot	Position	1	S100B-	DAPI+	1799
68818	41771.5	6.59547	µm	Spot	Position	1	S100B-	DAPI+	1805
68991.2	41773.3	6.02592	µm	Spot	Position	1	S100B-	DAPI+	1821
68989.8	41772	6.34621	µm	Spot	Position	1	S100B-	DAPI+	1824
68995	41772.4	6.99418	µm	Spot	Position	1	S100B-	DAPI+	1827
69451.3	41745.2	6.22341	µm	Spot	Position	1	S100B-	DAPI+	1835
69435.2	41751.8	6.48587	µm	Spot	Position	1	S100B-	DAPI+	1840
69458.2	41748	6.63737	µm	Spot	Position	1	S100B-	DAPI+	1841
69472.7	41733.3	6.49517	µm	Spot	Position	1	S100B-	DAPI+	1843
69477.2	41727.8	7.09534	µm	Spot	Position	1	S100B-	DAPI+	1848
68756.5	41810.4	6.00844	µm	Spot	Position	1	S100B-	DAPI+	1852
68783.8	41787	6.14933	µm	Spot	Position	1	S100B-	DAPI+	1855
68809.3	41775.8	6.40456	µm	Spot	Position	1	S100B-	DAPI+	1858
68792.4	41781	6.80613	µm	Spot	Position	1	S100B-	DAPI+	1860
68814.4	41774.5	6.40825	µm	Spot	Position	1	S100B-	DAPI+	1863
68818.2	41778.4	6.39545	µm	Spot	Position	1	S100B-	DAPI+	1865
69183.8	41797.4	6.10763	µm	Spot	Position	1	S100B-	DAPI+	1893
69227	41802.2	6.0769	µm	Spot	Position	1	S100B-	DAPI+	1895
69288.8	41800.3	6.91356	µm	Spot	Position	1	S100B-	DAPI+	1940
69351	41797.4	6.37218	µm	Spot	Position	1	S100B-	DAPI+	1949
69369.7	41781.7	6.23259	µm	Spot	Position	1	S100B-	DAPI+	1965
69369	41781.9	6.50844	µm	Spot	Position	1	S100B-	DAPI+	1967
68645.1	41850.7	6.12464	µm	Spot	Position	1	S100B-	DAPI+	1968
68638.2	41857.4	6.38779	µm	Spot	Position	1	S100B-	DAPI+	1971
68683.9	41845.7	6.72333	µm	Spot	Position	1	S100B-	DAPI+	1979
68643.6	41899.3	6.87595	µm	Spot	Position	1	S100B-	DAPI+	1995
68647.1	41897	6.98806	µm	Spot	Position	1	S100B-	DAPI+	1997
69718.2	41195.5	7.69193	µm	Spot	Position	1	S100B-	DAPI+	1998
69695.3	41221.8	8.37572	µm	Spot	Position	1	S100B-	DAPI+	2002
69756.2	41339.6	7.61928	µm	Spot	Position	1	S100B-	DAPI+	2004
69769.8	41384.4	7.42479	µm	Spot	Position	1	S100B-	DAPI+	2007
69768.1	41380.9	8.26707	µm	Spot	Position	1	S100B-	DAPI+	2011
69645.9	41651.1	7.5763	µm	Spot	Position	1	S100B-	DAPI+	2021
69649.8	41648.6	8.27588	µm	Spot	Position	1	S100B-	DAPI+	2022
69772.8	41660.6	7.8832	µm	Spot	Position	1	S100B-	DAPI+	2023
69544.9	41706.1	7.80056	µm	Spot	Position	1	S100B-	DAPI+	2031
69537.5	41712.9	7.99912	µm	Spot	Position	1	S100B-	DAPI+	2033
69388.7	41767	7.99492	µm	Spot	Position	1	S100B-	DAPI+	2049
69478.7	41740	7.42198	µm	Spot	Position	1	S100B-	DAPI+	2056
69460.3	41742.1	7.43309	µm	Spot	Position	1	S100B-	DAPI+	2057
68765.7	41794.2	7.628	µm	Spot	Position	1	S100B-	DAPI+	2060
68765.3	41816.3	8.09367	µm	Spot	Position	1	S100B-	DAPI+	2061
68762.2	41800.8	8.20097	µm	Spot	Position	1	S100B-	DAPI+	2062
68801	41782.4	7.50617	µm	Spot	Position	1	S100B-	DAPI+	2064
68784	41791.9	7.6226	µm	Spot	Position	1	S100B-	DAPI+	2065
68766.9	41795.5	7.64981	µm	Spot	Position	1	S100B-	DAPI+	2066
68766.8	41801.2	7.81976	µm	Spot	Position	1	S100B-	DAPI+	2068
68990.5	41774.4	7.38249	µm	Spot	Position	1	S100B-	DAPI+	2069
69233	41791	7.6137	µm	Spot	Position	1	S100B-	DAPI+	2098
69397.4	41781.5	7.76788	µm	Spot	Position	1	S100B-	DAPI+	2127
69370.5	41793.1	7.54607	µm	Spot	Position	1	S100B-	DAPI+	2128
68652.5	41860	7.50528	µm	Spot	Position	1	S100B-	DAPI+	2130
68638.4	41865.6	7.72098	µm	Spot	Position	1	S100B-	DAPI+	2132
68648.5	41894.5	7.71297	µm	Spot	Position	1	S100B-	DAPI+	2142
68650	41894.9	8.02106	µm	Spot	Position	1	S100B-	DAPI+	2144
69755.7	41334.8	8.44819	µm	Spot	Position	1	S100B-	DAPI+	2149
69755.4	41340.3	8.80293	µm	Spot	Position	1	S100B-	DAPI+	2151
69760.7	41568	8.51632	µm	Spot	Position	1	S100B-	DAPI+	2156
69649.1	41650.7	8.68254	µm	Spot	Position	1	S100B-	DAPI+	2161
69493.9	41724	8.9574	µm	Spot	Position	1	S100B-	DAPI+	2166
69404.2	41773.2	8.94664	µm	Spot	Position	1	S100B-	DAPI+	2181
69484.3	41735	8.87219	µm	Spot	Position	1	S100B-	DAPI+	2184
69495.6	41729.4	9.36033	µm	Spot	Position	1	S100B-	DAPI+	2186
69107.7	41778.7	9.05119	µm	Spot	Position	1	S100B-	DAPI+	2193

## Sheet: Sample 2-Crym+S100b-Position - 
AC338 Crym 555S100b 488_R_[ii28_TileScan_2_Merged_Image_29]_Position
Position
====================
Position X	Position Y	Position Z	Unit	Category	Collection	Time	S100b	dapi	ID
63663.8	44742.5	2.82896	µm	Spot	Position	1		DAPI-	21
63668.2	44798	3.90601	µm	Spot	Position	1		DAPI-	76
63674.3	44820.2	4.48652	µm	Spot	Position	1		DAPI-	96
63650.6	44905.4	4.60699	µm	Spot	Position	1		DAPI-	109
63688.5	44636.7	4.83496	µm	Spot	Position	1		DAPI-	126
63684.1	44666.3	5.59066	µm	Spot	Position	1		DAPI-	135
63692.7	44656.5	5.70524	µm	Spot	Position	1		DAPI-	137
63667.4	44798.6	5.191	µm	Spot	Position	1		DAPI-	196
63679.8	44786.1	5.87707	µm	Spot	Position	1		DAPI-	205
63662.6	44890.8	5.29005	µm	Spot	Position	1		DAPI-	236
63669.4	44852.3	5.61943	µm	Spot	Position	1		DAPI-	243
63651.3	44907.2	5.29985	µm	Spot	Position	1		DAPI-	248
63660.3	44972.5	4.97777	µm	Spot	Position	1		DAPI-	262
63651.8	45045.4	5.79775	µm	Spot	Position	1		DAPI-	279
63649.5	45083.5	5.63793	µm	Spot	Position	1		DAPI-	283
63643.5	45133.3	5.66643	µm	Spot	Position	1		DAPI-	296
63669	44692.3	6.73684	µm	Spot	Position	1		DAPI-	327
63686.6	44739.1	6.35966	µm	Spot	Position	1		DAPI-	338
63664.1	44784.2	6.59031	µm	Spot	Position	1		DAPI-	349
63679.3	44783.2	7.15635	µm	Spot	Position	1		DAPI-	365
63666.8	44800.9	7.11726	µm	Spot	Position	1		DAPI-	366
63660.5	44891.7	6.40627	µm	Spot	Position	1		DAPI-	381
63649.4	44905.7	6.87913	µm	Spot	Position	1		DAPI-	397
63654.9	44907	7.04233	µm	Spot	Position	1		DAPI-	402
63671.3	44905.4	6.16198	µm	Spot	Position	1		DAPI-	406
63666.3	44898.4	6.72047	µm	Spot	Position	1		DAPI-	407
63667.3	44921.8	7.09603	µm	Spot	Position	1		DAPI-	409
63668.4	44925.3	7.06522	µm	Spot	Position	1		DAPI-	410
63661.7	44956.3	6.23859	µm	Spot	Position	1		DAPI-	411
63664.2	45016.3	6.47625	µm	Spot	Position	1		DAPI-	421
63664.6	45013.1	6.89568	µm	Spot	Position	1		DAPI-	423
63665.1	45018	6.62344	µm	Spot	Position	1		DAPI-	424
63663.8	45019.7	6.80519	µm	Spot	Position	1		DAPI-	426
63665.8	45014.8	6.37816	µm	Spot	Position	1		DAPI-	430
63652.9	45058.4	6.77447	µm	Spot	Position	1		DAPI-	444
63652.7	45065.9	6.95914	µm	Spot	Position	1		DAPI-	446
63647.9	45093.6	6.27516	µm	Spot	Position	1		DAPI-	448
63647.1	45104.6	6.07156	µm	Spot	Position	1		DAPI-	450
63647.8	45131.7	6.66952	µm	Spot	Position	1		DAPI-	467
63648.9	45143.3	6.62544	µm	Spot	Position	1		DAPI-	469
63644.6	45147.5	7.03909	µm	Spot	Position	1		DAPI-	475
63630.4	45307.9	6.77767	µm	Spot	Position	1		DAPI-	490
63587.1	45516.4	6.8567	µm	Spot	Position	1		DAPI-	500
63666.2	44898	7.86287	µm	Spot	Position	1		DAPI-	531
63661	44905.7	8.20555	µm	Spot	Position	1		DAPI-	536
63652	45075.4	7.24167	µm	Spot	Position	1		DAPI-	552
63638.8	45188	7.35356	µm	Spot	Position	1		DAPI-	578
63632.5	45219.1	8.33161	µm	Spot	Position	1		DAPI-	583
63634.8	45231.8	7.54069	µm	Spot	Position	1		DAPI-	588
63634.2	45263.5	7.60454	µm	Spot	Position	1		DAPI-	591
63626.7	45278.2	7.32637	µm	Spot	Position	1		DAPI-	607
63630.7	45272.3	8.01826	µm	Spot	Position	1		DAPI-	613
63630.6	45302.4	7.92757	µm	Spot	Position	1		DAPI-	615
63598.2	45405.3	7.35334	µm	Spot	Position	1		DAPI-	630
63598.3	45439.3	8.39758	µm	Spot	Position	1		DAPI-	643
63596.7	45454	8.29521	µm	Spot	Position	1		DAPI-	653
63585.2	45517.5	7.4288	µm	Spot	Position	1		DAPI-	659
63586.9	45512.9	7.74026	µm	Spot	Position	1		DAPI-	662
63588.3	45518.4	7.62551	µm	Spot	Position	1		DAPI-	667
63565.4	45580	7.57728	µm	Spot	Position	1		DAPI-	686
63563.1	45612.8	8.29426	µm	Spot	Position	1		DAPI-	692
63641.5	45224.5	8.44709	µm	Spot	Position	1		DAPI-	740
63613	45353.6	9.13615	µm	Spot	Position	1		DAPI-	793
63601.3	45404.3	9.48583	µm	Spot	Position	1		DAPI-	809
63605	45406.7	8.47499	µm	Spot	Position	1		DAPI-	810
63602.3	45410	8.78649	µm	Spot	Position	1		DAPI-	816
63597.3	45461.1	8.93528	µm	Spot	Position	1		DAPI-	827
63594.5	45461.9	8.93736	µm	Spot	Position	1		DAPI-	828
63590.4	45483.8	8.78166	µm	Spot	Position	1		DAPI-	832
63597.7	45461.7	9.01237	µm	Spot	Position	1		DAPI-	834
63594.2	45463.4	9.49677	µm	Spot	Position	1		DAPI-	840
63585.5	45508.9	8.5021	µm	Spot	Position	1		DAPI-	849
63579.9	45532.9	8.49313	µm	Spot	Position	1		DAPI-	852
63589.2	45514.3	8.80342	µm	Spot	Position	1		DAPI-	854
63583.4	45518.5	8.72186	µm	Spot	Position	1		DAPI-	855
63585.4	45506.7	9.21437	µm	Spot	Position	1		DAPI-	864
63586.2	45511.8	9.05644	µm	Spot	Position	1		DAPI-	867
63586.2	45509.5	9.38252	µm	Spot	Position	1		DAPI-	873
63578.9	45551.8	8.80533	µm	Spot	Position	1		DAPI-	895
63577.8	45555.4	8.92908	µm	Spot	Position	1		DAPI-	896
63575.4	45563.1	9.10834	µm	Spot	Position	1		DAPI-	900
63561.7	45631.1	8.84384	µm	Spot	Position	1		DAPI-	907
63562.9	45608.7	9.24796	µm	Spot	Position	1		DAPI-	909
63561.9	45629	9.19061	µm	Spot	Position	1		DAPI-	911
63564	45597	9.34796	µm	Spot	Position	1		DAPI-	912
63560.8	45628.3	9.31989	µm	Spot	Position	1		DAPI-	916
63562.3	45631.9	9.51983	µm	Spot	Position	1		DAPI-	917
63542.6	45744	9.56827	µm	Spot	Position	1		DAPI-	921
63534.6	45820	9.45065	µm	Spot	Position	1		DAPI-	924
63528.4	45860.7	9.59167	µm	Spot	Position	1		DAPI-	942
63605.5	45385.6	9.73841	µm	Spot	Position	1		DAPI-	993
63615.2	45379.8	10.2346	µm	Spot	Position	1		DAPI-	998
63601.2	45431.4	9.64472	µm	Spot	Position	1		DAPI-	1007
63604.5	45436.2	9.75675	µm	Spot	Position	1		DAPI-	1008
63603.2	45429	9.98237	µm	Spot	Position	1		DAPI-	1010
63602.8	45430.6	9.92111	µm	Spot	Position	1		DAPI-	1011
63590.5	45486	10.0389	µm	Spot	Position	1		DAPI-	1021
63571.6	45582.3	9.80347	µm	Spot	Position	1		DAPI-	1038
63578	45546.2	9.6657	µm	Spot	Position	1		DAPI-	1049
63577.8	45549.7	9.72909	µm	Spot	Position	1		DAPI-	1050
63574.5	45566.9	9.75175	µm	Spot	Position	1		DAPI-	1052
63582.7	45545.1	10.0391	µm	Spot	Position	1		DAPI-	1054
63575.3	45549.4	10.1162	µm	Spot	Position	1		DAPI-	1056
63565.6	45599.2	10.1909	µm	Spot	Position	1		DAPI-	1066
63566.8	45599.3	9.90936	µm	Spot	Position	1		DAPI-	1067
63568.2	45607.4	10.0622	µm	Spot	Position	1		DAPI-	1068
63565.1	45614.2	9.94247	µm	Spot	Position	1		DAPI-	1070
63561.9	45619.6	10.1648	µm	Spot	Position	1		DAPI-	1072
63564.6	45630.4	10.1462	µm	Spot	Position	1		DAPI-	1073
63568.4	45597.5	10.4219	µm	Spot	Position	1		DAPI-	1074
63567	45608.6	10.3739	µm	Spot	Position	1		DAPI-	1076
63562.3	45599.6	10.5264	µm	Spot	Position	1		DAPI-	1078
63567.7	45600.7	10.6738	µm	Spot	Position	1		DAPI-	1079
63565.2	45606.3	10.5294	µm	Spot	Position	1		DAPI-	1081
63566.4	45611.1	10.6066	µm	Spot	Position	1		DAPI-	1082
63561.9	45638	10.1423	µm	Spot	Position	1		DAPI-	1087
63560.5	45638.5	10.3028	µm	Spot	Position	1		DAPI-	1090
63538.3	45819.7	10.7162	µm	Spot	Position	1		DAPI-	1119
63526.4	45860.7	10.0387	µm	Spot	Position	1		DAPI-	1125
63537.6	45843.1	10.029	µm	Spot	Position	1		DAPI-	1135
63534.3	45822.7	10.4587	µm	Spot	Position	1		DAPI-	1140
63531.7	45846.8	10.3009	µm	Spot	Position	1		DAPI-	1142
63535.8	45845.4	10.6014	µm	Spot	Position	1		DAPI-	1146
63530.9	45847.8	10.6414	µm	Spot	Position	1		DAPI-	1147
63532.1	45867.8	10.7913	µm	Spot	Position	1		DAPI-	1148
63528.4	45907.9	9.94248	µm	Spot	Position	1		DAPI-	1151
63520.8	45950.6	10.5428	µm	Spot	Position	1		DAPI-	1155
63526.9	45919.1	9.77703	µm	Spot	Position	1		DAPI-	1156
63564.8	45601.9	11.0447	µm	Spot	Position	1		DAPI-	1210
63567.6	45604.3	10.9347	µm	Spot	Position	1		DAPI-	1211
63557	45639.4	11.0106	µm	Spot	Position	1		DAPI-	1220
63556.4	45649.7	10.8874	µm	Spot	Position	1		DAPI-	1224
63557	45651.5	11.2004	µm	Spot	Position	1		DAPI-	1229
63544	45695.5	11.7172	µm	Spot	Position	1		DAPI-	1238
63538.9	45754.2	11.0401	µm	Spot	Position	1		DAPI-	1242
63541.7	45756	11.5172	µm	Spot	Position	1		DAPI-	1244
63540.1	45752.1	11.7394	µm	Spot	Position	1		DAPI-	1246
63543.5	45758	11.9246	µm	Spot	Position	1		DAPI-	1247
63540.7	45813	11.0558	µm	Spot	Position	1		DAPI-	1248
63537.4	45819.8	11.0189	µm	Spot	Position	1		DAPI-	1249
63539.9	45788.5	11.8179	µm	Spot	Position	1		DAPI-	1250
63535.4	45819.2	11.8283	µm	Spot	Position	1		DAPI-	1251
63530.3	45863.1	11.2121	µm	Spot	Position	1		DAPI-	1265
63531.7	45863.7	11.2206	µm	Spot	Position	1		DAPI-	1266
63536.5	45824.4	11.6847	µm	Spot	Position	1		DAPI-	1267
63533.9	45851.4	11.5486	µm	Spot	Position	1		DAPI-	1270
63530.8	45858.6	11.5496	µm	Spot	Position	1		DAPI-	1271
63531.8	45860.3	11.796	µm	Spot	Position	1		DAPI-	1274
63530.8	45905.2	11.0191	µm	Spot	Position	1		DAPI-	1276
63530.9	45912	11.5018	µm	Spot	Position	1		DAPI-	1279
63525.7	45921.6	11.2366	µm	Spot	Position	1		DAPI-	1282
63528.4	45916.2	11.6648	µm	Spot	Position	1		DAPI-	1284
63544.3	45774.2	12.1687	µm	Spot	Position	1		DAPI-	1333
63545.9	45766.6	12.7189	µm	Spot	Position	1		DAPI-	1335
63537.7	45788.9	12.1855	µm	Spot	Position	1		DAPI-	1339
63535.4	45808.8	12.177	µm	Spot	Position	1		DAPI-	1342
63540.7	45819	12.0379	µm	Spot	Position	1		DAPI-	1344
63542.3	45785.1	12.5912	µm	Spot	Position	1		DAPI-	1345
63540.5	45785.7	12.3304	µm	Spot	Position	1		DAPI-	1346
63537.6	45806.9	12.5419	µm	Spot	Position	1		DAPI-	1348
63532.4	45803.6	12.7785	µm	Spot	Position	1		DAPI-	1350
63537.3	45791.9	12.9721	µm	Spot	Position	1		DAPI-	1351
63533.8	45822.5	12.5894	µm	Spot	Position	1		DAPI-	1355
63527.4	45944.4	12.7131	µm	Spot	Position	1		DAPI-	1363
63526	45976.5	12.147	µm	Spot	Position	1		DAPI-	1364
63518.3	45973.7	12.4102	µm	Spot	Position	1		DAPI-	1366
63521.9	45977.7	12.4933	µm	Spot	Position	1		DAPI-	1367
63525.5	45998.4	12.5204	µm	Spot	Position	1		DAPI-	1368
63516.6	45975	12.6441	µm	Spot	Position	1		DAPI-	1370
63522.6	45974.9	12.628	µm	Spot	Position	1		DAPI-	1371
63518.3	45977.7	12.6259	µm	Spot	Position	1		DAPI-	1372
63523.2	45980.4	12.6854	µm	Spot	Position	1		DAPI-	1373
63523.5	45979.1	13.1738	µm	Spot	Position	1		DAPI-	1377
63527.9	46003.5	12.2493	µm	Spot	Position	1		DAPI-	1381
63527.1	46005.9	12.8821	µm	Spot	Position	1		DAPI-	1382
63527.5	45981.5	13.1818	µm	Spot	Position	1		DAPI-	1383
63529	45987.3	13.1399	µm	Spot	Position	1		DAPI-	1384
63518.6	46012.8	12.5515	µm	Spot	Position	1		DAPI-	1387
63526	46006.8	12.8123	µm	Spot	Position	1		DAPI-	1388
63519.5	46013.6	13.1636	µm	Spot	Position	1		DAPI-	1390
63513.3	46093.8	12.476	µm	Spot	Position	1		DAPI-	1392
63541	45809.6	13.7856	µm	Spot	Position	1		DAPI-	1440
63540.3	45794.5	14.1433	µm	Spot	Position	1		DAPI-	1445
63525.8	45959.5	13.4429	µm	Spot	Position	1		DAPI-	1449
63526.5	45956.9	13.6479	µm	Spot	Position	1		DAPI-	1451
63526.9	45946.7	13.2877	µm	Spot	Position	1		DAPI-	1452
63529.1	45950.8	13.44	µm	Spot	Position	1		DAPI-	1453
63527.8	45930.5	13.7349	µm	Spot	Position	1		DAPI-	1454
63527.4	45951.9	13.8535	µm	Spot	Position	1		DAPI-	1455
63523.5	45975.5	13.2291	µm	Spot	Position	1		DAPI-	1457
63528.5	45991.8	13.237	µm	Spot	Position	1		DAPI-	1474
63530.5	45997.9	14.1999	µm	Spot	Position	1		DAPI-	1477
63517.2	46067.6	13.8556	µm	Spot	Position	1		DAPI-	1482
63503.1	46089.1	13.8817	µm	Spot	Position	1		DAPI-	1485
63538.9	45808.3	14.5965	µm	Spot	Position	1		DAPI-	1514
63533.6	45804.4	14.7778	µm	Spot	Position	1		DAPI-	1516
63530.7	45809.2	15.1227	µm	Spot	Position	1		DAPI-	1518
63539.6	45803.3	15.4709	µm	Spot	Position	1		DAPI-	1519
63531.1	45823.5	15.1881	µm	Spot	Position	1		DAPI-	1521
63528.5	45996.1	14.4891	µm	Spot	Position	1		DAPI-	1528
63583.9	46186.7	15.0409	µm	Spot	Position	1		DAPI-	1541
63775.2	46333.2	15.5543	µm	Spot	Position	1		DAPI-	1559
63613.7	46222.1	16.2169	µm	Spot	Position	1		DAPI-	1601
63687.9	44698.4	2.31634	µm	Spot	Position	1	S100B+	DAPI+	2
63693.5	44703.3	2.28112	µm	Spot	Position	1	S100B+	DAPI+	3
63661.5	44608.5	2.64055	µm	Spot	Position	1	S100B+	DAPI+	4
63663.3	44604.1	2.93361	µm	Spot	Position	1	S100B+	DAPI+	5
63658.8	44611.6	3.42697	µm	Spot	Position	1	S100B+	DAPI+	6
63679.7	44606.1	2.94406	µm	Spot	Position	1	S100B+	DAPI+	7
63670.5	44612.7	2.74713	µm	Spot	Position	1	S100B+	DAPI+	10
63676.5	44685.4	2.55658	µm	Spot	Position	1	S100B+	DAPI+	12
63691.7	44693.4	2.49067	µm	Spot	Position	1	S100B+	DAPI+	13
63687.7	44696.6	2.98183	µm	Spot	Position	1	S100B+	DAPI+	14
63691.7	44699.2	2.80099	µm	Spot	Position	1	S100B+	DAPI+	15
63689.6	44691.5	3.04577	µm	Spot	Position	1	S100B+	DAPI+	16
63687.4	44691.9	3.1975	µm	Spot	Position	1	S100B+	DAPI+	17
63689.1	44694.3	3.30044	µm	Spot	Position	1	S100B+	DAPI+	18
63674.8	44686.2	3.30595	µm	Spot	Position	1	S100B+	DAPI+	19
63670.9	44689.2	3.504	µm	Spot	Position	1	S100B+	DAPI+	20
63683.6	44721	3.47025	µm	Spot	Position	1	S100B+	DAPI+	22
63671	44744.3	3.42656	µm	Spot	Position	1	S100B+	DAPI+	23
63661.8	44856.9	3.56171	µm	Spot	Position	1	S100B+	DAPI+	25
63662.5	44605.6	4.16115	µm	Spot	Position	1	S100B+	DAPI+	27
63660.7	44612.9	3.95746	µm	Spot	Position	1	S100B+	DAPI+	28
63662.6	44603.6	4.7794	µm	Spot	Position	1	S100B+	DAPI+	29
63678	44606.9	3.77591	µm	Spot	Position	1	S100B+	DAPI+	31
63666.2	44614.1	4.39748	µm	Spot	Position	1	S100B+	DAPI+	33
63673.8	44616.1	4.25523	µm	Spot	Position	1	S100B+	DAPI+	34
63677.4	44644	3.84632	µm	Spot	Position	1	S100B+	DAPI+	36
63676	44641.9	4.05609	µm	Spot	Position	1	S100B+	DAPI+	37
63689	44642.2	3.9886	µm	Spot	Position	1	S100B+	DAPI+	38
63689.5	44644.6	4.00911	µm	Spot	Position	1	S100B+	DAPI+	39
63684.7	44659.8	3.99347	µm	Spot	Position	1	S100B+	DAPI+	40
63686.7	44656.4	4.37233	µm	Spot	Position	1	S100B+	DAPI+	41
63688.9	44631.9	4.78974	µm	Spot	Position	1	S100B+	DAPI+	43
63688.6	44633.9	4.74947	µm	Spot	Position	1	S100B+	DAPI+	44
63675.1	44641.4	4.70218	µm	Spot	Position	1	S100B+	DAPI+	45
63685	44655.9	4.72171	µm	Spot	Position	1	S100B+	DAPI+	46
63676.7	44659.9	4.58449	µm	Spot	Position	1	S100B+	DAPI+	47
63683.2	44661.4	4.57814	µm	Spot	Position	1	S100B+	DAPI+	48
63675	44684.3	3.69958	µm	Spot	Position	1	S100B+	DAPI+	49
63678.9	44685.8	4.18761	µm	Spot	Position	1	S100B+	DAPI+	50
63675.5	44688.6	4.01042	µm	Spot	Position	1	S100B+	DAPI+	51
63674	44690.7	4.12429	µm	Spot	Position	1	S100B+	DAPI+	52
63694.2	44699.5	4.09398	µm	Spot	Position	1	S100B+	DAPI+	53
63694	44702.9	4.13639	µm	Spot	Position	1	S100B+	DAPI+	54
63682.7	44688.3	4.42993	µm	Spot	Position	1	S100B+	DAPI+	55
63677.6	44691.6	4.49003	µm	Spot	Position	1	S100B+	DAPI+	56
63688.9	44692.7	4.44253	µm	Spot	Position	1	S100B+	DAPI+	57
63687.4	44712.2	4.4152	µm	Spot	Position	1	S100B+	DAPI+	58
63667.1	44681.3	4.69081	µm	Spot	Position	1	S100B+	DAPI+	61
63681.4	44690	4.59266	µm	Spot	Position	1	S100B+	DAPI+	62
63685.7	44690.8	4.59634	µm	Spot	Position	1	S100B+	DAPI+	63
63686.2	44692.8	4.50345	µm	Spot	Position	1	S100B+	DAPI+	64
63694.9	44696.7	4.63365	µm	Spot	Position	1	S100B+	DAPI+	65
63693.4	44707.4	4.61405	µm	Spot	Position	1	S100B+	DAPI+	66
63673.2	44755.2	3.66133	µm	Spot	Position	1	S100B+	DAPI+	67
63686	44727.4	4.17599	µm	Spot	Position	1	S100B+	DAPI+	68
63686.7	44717.3	4.74324	µm	Spot	Position	1	S100B+	DAPI+	69
63674.5	44723.4	4.73269	µm	Spot	Position	1	S100B+	DAPI+	71
63687.3	44730.3	4.71564	µm	Spot	Position	1	S100B+	DAPI+	72
63675.4	44751	4.74118	µm	Spot	Position	1	S100B+	DAPI+	73
63676.5	44758.6	4.73342	µm	Spot	Position	1	S100B+	DAPI+	74
63671.8	44764.1	3.87977	µm	Spot	Position	1	S100B+	DAPI+	75
63672.4	44798.7	4.05769	µm	Spot	Position	1	S100B+	DAPI+	77
63675.2	44779.4	4.42577	µm	Spot	Position	1	S100B+	DAPI+	78
63674.7	44780.8	4.45592	µm	Spot	Position	1	S100B+	DAPI+	79
63670.6	44800.8	4.50119	µm	Spot	Position	1	S100B+	DAPI+	81
63670.6	44762.1	4.69005	µm	Spot	Position	1	S100B+	DAPI+	82
63671.3	44787	4.7445	µm	Spot	Position	1	S100B+	DAPI+	83
63670.8	44790.6	4.54277	µm	Spot	Position	1	S100B+	DAPI+	84
63669.7	44797.1	4.75924	µm	Spot	Position	1	S100B+	DAPI+	85
63664.2	44810.4	4.34037	µm	Spot	Position	1	S100B+	DAPI+	86
63662.4	44810.6	4.6678	µm	Spot	Position	1	S100B+	DAPI+	88
63673.6	44817.6	3.81134	µm	Spot	Position	1	S100B+	DAPI+	89
63670.8	44809.2	3.99818	µm	Spot	Position	1	S100B+	DAPI+	90
63669.5	44809.3	3.99254	µm	Spot	Position	1	S100B+	DAPI+	91
63669.4	44814	3.90288	µm	Spot	Position	1	S100B+	DAPI+	92
63672	44818.8	4.02909	µm	Spot	Position	1	S100B+	DAPI+	93
63667.5	44819	4.17775	µm	Spot	Position	1	S100B+	DAPI+	94
63671.9	44815.5	4.30097	µm	Spot	Position	1	S100B+	DAPI+	95
63666	44829.4	4.24534	µm	Spot	Position	1	S100B+	DAPI+	97
63666.9	44816.4	4.54056	µm	Spot	Position	1	S100B+	DAPI+	98
63663.1	44858.8	3.72954	µm	Spot	Position	1	S100B+	DAPI+	99
63663.4	44877.9	4.27367	µm	Spot	Position	1	S100B+	DAPI+	100
63669.1	44859.8	3.71267	µm	Spot	Position	1	S100B+	DAPI+	101
63665.7	44862.3	3.72115	µm	Spot	Position	1	S100B+	DAPI+	102
63665.8	44876.4	4.0651	µm	Spot	Position	1	S100B+	DAPI+	103
63668.1	44858.2	4.41732	µm	Spot	Position	1	S100B+	DAPI+	104
63666.9	44861.8	4.62303	µm	Spot	Position	1	S100B+	DAPI+	105
63667.4	44866	4.76208	µm	Spot	Position	1	S100B+	DAPI+	106
63665.5	44870.1	4.71937	µm	Spot	Position	1	S100B+	DAPI+	107
63665	44940.8	4.78738	µm	Spot	Position	1	S100B+	DAPI+	110
63659	44979.8	3.69624	µm	Spot	Position	1	S100B+	DAPI+	111
63662.1	44982.9	4.10038	µm	Spot	Position	1	S100B+	DAPI+	112
63658	44984.3	4.01421	µm	Spot	Position	1	S100B+	DAPI+	113
63656.5	44974.7	4.46102	µm	Spot	Position	1	S100B+	DAPI+	114
63656.1	44976	4.38858	µm	Spot	Position	1	S100B+	DAPI+	115
63663.1	44983.2	4.33786	µm	Spot	Position	1	S100B+	DAPI+	116
63656.4	44977.8	4.61121	µm	Spot	Position	1	S100B+	DAPI+	117
63645.3	45082.1	4.68117	µm	Spot	Position	1	S100B+	DAPI+	118
63671.6	44612	5.1191	µm	Spot	Position	1	S100B+	DAPI+	122
63669.3	44617.6	5.50935	µm	Spot	Position	1	S100B+	DAPI+	123
63666.9	44607.9	5.90009	µm	Spot	Position	1	S100B+	DAPI+	124
63664.8	44667.1	5.76683	µm	Spot	Position	1	S100B+	DAPI+	125
63686.9	44662.7	4.84374	µm	Spot	Position	1	S100B+	DAPI+	127
63688.5	44635.7	5.23672	µm	Spot	Position	1	S100B+	DAPI+	128
63692.9	44637.9	5.35143	µm	Spot	Position	1	S100B+	DAPI+	129
63678.2	44645.8	5.31636	µm	Spot	Position	1	S100B+	DAPI+	130
63690.9	44647.6	5.17338	µm	Spot	Position	1	S100B+	DAPI+	131
63680.1	44647.4	5.64368	µm	Spot	Position	1	S100B+	DAPI+	134
63689.4	44660.1	5.80734	µm	Spot	Position	1	S100B+	DAPI+	138
63683.2	44666.9	5.95007	µm	Spot	Position	1	S100B+	DAPI+	139
63665	44684.8	5.52353	µm	Spot	Position	1	S100B+	DAPI+	140
63687.8	44679.9	5.07821	µm	Spot	Position	1	S100B+	DAPI+	141
63689.9	44681.8	5.08541	µm	Spot	Position	1	S100B+	DAPI+	142
63665.6	44682.9	5.04983	µm	Spot	Position	1	S100B+	DAPI+	143
63685.1	44686.4	5.02059	µm	Spot	Position	1	S100B+	DAPI+	144
63677.9	44690	4.99583	µm	Spot	Position	1	S100B+	DAPI+	145
63689.9	44700.3	4.84361	µm	Spot	Position	1	S100B+	DAPI+	146
63687	44711.4	4.90571	µm	Spot	Position	1	S100B+	DAPI+	147
63685.9	44669.7	5.27436	µm	Spot	Position	1	S100B+	DAPI+	148
63672.7	44685	5.20891	µm	Spot	Position	1	S100B+	DAPI+	149
63685.6	44698	5.13755	µm	Spot	Position	1	S100B+	DAPI+	150
63695.2	44674.4	5.68573	µm	Spot	Position	1	S100B+	DAPI+	152
63669.6	44681.6	5.61698	µm	Spot	Position	1	S100B+	DAPI+	153
63672.3	44690.4	5.7032	µm	Spot	Position	1	S100B+	DAPI+	154
63693.4	44670.5	5.95136	µm	Spot	Position	1	S100B+	DAPI+	157
63688.3	44673.4	5.89546	µm	Spot	Position	1	S100B+	DAPI+	158
63681.9	44679.7	5.7991	µm	Spot	Position	1	S100B+	DAPI+	159
63692	44680.8	5.81827	µm	Spot	Position	1	S100B+	DAPI+	160
63683.7	44682.3	5.97079	µm	Spot	Position	1	S100B+	DAPI+	161
63691	44682.8	5.73075	µm	Spot	Position	1	S100B+	DAPI+	162
63693.5	44687.4	5.84498	µm	Spot	Position	1	S100B+	DAPI+	163
63687.2	44688.4	5.7555	µm	Spot	Position	1	S100B+	DAPI+	164
63694.2	44690.8	5.76915	µm	Spot	Position	1	S100B+	DAPI+	165
63691.5	44695.5	5.9497	µm	Spot	Position	1	S100B+	DAPI+	166
63678.3	44717.3	4.88422	µm	Spot	Position	1	S100B+	DAPI+	167
63686.5	44718.7	4.97432	µm	Spot	Position	1	S100B+	DAPI+	168
63686.4	44732.3	4.94786	µm	Spot	Position	1	S100B+	DAPI+	169
63668.8	44754.8	4.935	µm	Spot	Position	1	S100B+	DAPI+	170
63681.3	44740	5.2251	µm	Spot	Position	1	S100B+	DAPI+	172
63679.2	44742.4	5.2074	µm	Spot	Position	1	S100B+	DAPI+	173
63672.7	44743	5.28827	µm	Spot	Position	1	S100B+	DAPI+	174
63670.2	44746.5	5.19439	µm	Spot	Position	1	S100B+	DAPI+	175
63668.7	44747.9	5.29805	µm	Spot	Position	1	S100B+	DAPI+	176
63675.5	44748.8	5.21021	µm	Spot	Position	1	S100B+	DAPI+	177
63677.9	44753.1	5.29255	µm	Spot	Position	1	S100B+	DAPI+	178
63684.2	44723.5	5.58165	µm	Spot	Position	1	S100B+	DAPI+	179
63672.4	44726.7	5.52508	µm	Spot	Position	1	S100B+	DAPI+	180
63673.2	44749.1	5.59121	µm	Spot	Position	1	S100B+	DAPI+	181
63681.4	44714.5	5.89897	µm	Spot	Position	1	S100B+	DAPI+	182
63685.8	44722.9	5.90466	µm	Spot	Position	1	S100B+	DAPI+	183
63682.2	44724	5.82631	µm	Spot	Position	1	S100B+	DAPI+	184
63664	44778.8	5.49613	µm	Spot	Position	1	S100B+	DAPI+	185
63668.3	44775	4.81725	µm	Spot	Position	1	S100B+	DAPI+	186
63671.8	44789.7	4.9403	µm	Spot	Position	1	S100B+	DAPI+	187
63672.7	44790.1	4.873	µm	Spot	Position	1	S100B+	DAPI+	188
63667.3	44793.8	4.89514	µm	Spot	Position	1	S100B+	DAPI+	189
63675.1	44768.4	5.17488	µm	Spot	Position	1	S100B+	DAPI+	190
63670	44771.9	5.33848	µm	Spot	Position	1	S100B+	DAPI+	191
63666.4	44775.3	5.38768	µm	Spot	Position	1	S100B+	DAPI+	192
63670.7	44775.3	5.32133	µm	Spot	Position	1	S100B+	DAPI+	193
63670.4	44786.6	5.34014	µm	Spot	Position	1	S100B+	DAPI+	194
63673.2	44795.4	5.10685	µm	Spot	Position	1	S100B+	DAPI+	195
63668.9	44764.4	5.67748	µm	Spot	Position	1	S100B+	DAPI+	197
63668.3	44776.6	5.52535	µm	Spot	Position	1	S100B+	DAPI+	198
63666.9	44778.6	5.51814	µm	Spot	Position	1	S100B+	DAPI+	199
63678.4	44782.3	5.55455	µm	Spot	Position	1	S100B+	DAPI+	200
63672.6	44784.8	5.43932	µm	Spot	Position	1	S100B+	DAPI+	201
63668.8	44804.7	5.63732	µm	Spot	Position	1	S100B+	DAPI+	202
63678.7	44776.8	5.76886	µm	Spot	Position	1	S100B+	DAPI+	203
63671.9	44783.4	5.79637	µm	Spot	Position	1	S100B+	DAPI+	204
63674.1	44790.4	5.93398	µm	Spot	Position	1	S100B+	DAPI+	206
63669.5	44798.2	5.83552	µm	Spot	Position	1	S100B+	DAPI+	207
63665.3	44816	5.07788	µm	Spot	Position	1	S100B+	DAPI+	208
63665.4	44819.2	4.80363	µm	Spot	Position	1	S100B+	DAPI+	209
63660.7	44835.7	5.50695	µm	Spot	Position	1	S100B+	DAPI+	212
63661.3	44844.3	5.62491	µm	Spot	Position	1	S100B+	DAPI+	213
63661	44846.5	5.51787	µm	Spot	Position	1	S100B+	DAPI+	214
63664	44846.9	5.63818	µm	Spot	Position	1	S100B+	DAPI+	215
63660.8	44850.4	5.53357	µm	Spot	Position	1	S100B+	DAPI+	216
63663.5	44813.3	5.76306	µm	Spot	Position	1	S100B+	DAPI+	217
63664.8	44833	5.75788	µm	Spot	Position	1	S100B+	DAPI+	218
63661.9	44833.8	5.94985	µm	Spot	Position	1	S100B+	DAPI+	219
63663.8	44838.3	5.71637	µm	Spot	Position	1	S100B+	DAPI+	220
63660.8	44847.9	5.75217	µm	Spot	Position	1	S100B+	DAPI+	221
63665.7	44807.7	5.18368	µm	Spot	Position	1	S100B+	DAPI+	222
63669.8	44816.9	5.21542	µm	Spot	Position	1	S100B+	DAPI+	223
63667.7	44821.7	5.36204	µm	Spot	Position	1	S100B+	DAPI+	224
63669	44826.3	5.27475	µm	Spot	Position	1	S100B+	DAPI+	225
63669.2	44812	5.41949	µm	Spot	Position	1	S100B+	DAPI+	229
63665.4	44813.9	5.62228	µm	Spot	Position	1	S100B+	DAPI+	230
63655.1	44857.2	4.88737	µm	Spot	Position	1	S100B+	DAPI+	232
63660.9	44861.5	5.19115	µm	Spot	Position	1	S100B+	DAPI+	233
63653.9	44877.4	5.18736	µm	Spot	Position	1	S100B+	DAPI+	235
63663.4	44873	5.56512	µm	Spot	Position	1	S100B+	DAPI+	237
63650.3	44895.6	5.71119	µm	Spot	Position	1	S100B+	DAPI+	238
63669.3	44879.1	5.06548	µm	Spot	Position	1	S100B+	DAPI+	239
63667.7	44881.7	5.18301	µm	Spot	Position	1	S100B+	DAPI+	241
63667.7	44882.7	5.20321	µm	Spot	Position	1	S100B+	DAPI+	242
63666.4	44877.6	5.85334	µm	Spot	Position	1	S100B+	DAPI+	245
63669.6	44881.9	5.96257	µm	Spot	Position	1	S100B+	DAPI+	246
63662.4	44941.9	4.97169	µm	Spot	Position	1	S100B+	DAPI+	247
63654	44913.2	5.17771	µm	Spot	Position	1	S100B+	DAPI+	249
63661.5	44937.9	5.36879	µm	Spot	Position	1	S100B+	DAPI+	251
63649.1	44904.3	5.43162	µm	Spot	Position	1	S100B+	DAPI+	252
63655.3	44915.3	5.49281	µm	Spot	Position	1	S100B+	DAPI+	253
63659.4	44937.4	5.50686	µm	Spot	Position	1	S100B+	DAPI+	254
63661	44940.6	5.60428	µm	Spot	Position	1	S100B+	DAPI+	255
63658.2	44927.3	5.84952	µm	Spot	Position	1	S100B+	DAPI+	256
63656.2	44938.5	5.91668	µm	Spot	Position	1	S100B+	DAPI+	257
63656.5	44943.9	5.81848	µm	Spot	Position	1	S100B+	DAPI+	258
63666.7	44938.4	5.14143	µm	Spot	Position	1	S100B+	DAPI+	259
63667.1	44913.3	5.85199	µm	Spot	Position	1	S100B+	DAPI+	261
63660	44974.9	4.90302	µm	Spot	Position	1	S100B+	DAPI+	263
63657.7	44988.6	5.02422	µm	Spot	Position	1	S100B+	DAPI+	264
63661.2	44963.8	5.18405	µm	Spot	Position	1	S100B+	DAPI+	265
63659	44970.3	5.14455	µm	Spot	Position	1	S100B+	DAPI+	267
63658.1	44970.7	5.32402	µm	Spot	Position	1	S100B+	DAPI+	268
63656.9	44972.2	5.14439	µm	Spot	Position	1	S100B+	DAPI+	269
63659.8	44987.8	5.2214	µm	Spot	Position	1	S100B+	DAPI+	270
63663.4	44985.9	5.57002	µm	Spot	Position	1	S100B+	DAPI+	271
63656.5	44987.2	5.50639	µm	Spot	Position	1	S100B+	DAPI+	272
63656.7	44957.7	5.85533	µm	Spot	Position	1	S100B+	DAPI+	274
63654.2	45051.9	5.92466	µm	Spot	Position	1	S100B+	DAPI+	280
63641.5	45112.5	5.01697	µm	Spot	Position	1	S100B+	DAPI+	281
63643.1	45109.9	5.26088	µm	Spot	Position	1	S100B+	DAPI+	282
63645.5	45103.4	5.70057	µm	Spot	Position	1	S100B+	DAPI+	284
63642.6	45117.3	5.53363	µm	Spot	Position	1	S100B+	DAPI+	285
63646.3	45096.7	5.90784	µm	Spot	Position	1	S100B+	DAPI+	287
63643.6	45108.9	5.81735	µm	Spot	Position	1	S100B+	DAPI+	288
63641.3	45116.4	5.80084	µm	Spot	Position	1	S100B+	DAPI+	289
63642.3	45118.4	5.82452	µm	Spot	Position	1	S100B+	DAPI+	290
63645.1	45126.7	5.94173	µm	Spot	Position	1	S100B+	DAPI+	291
63640.9	45148.9	5.24053	µm	Spot	Position	1	S100B+	DAPI+	292
63639.5	45156.5	5.24898	µm	Spot	Position	1	S100B+	DAPI+	293
63639.4	45157.9	5.18449	µm	Spot	Position	1	S100B+	DAPI+	294
63637.4	45161.1	5.1586	µm	Spot	Position	1	S100B+	DAPI+	295
63639.1	45148.8	5.68998	µm	Spot	Position	1	S100B+	DAPI+	297
63640.4	45154.9	5.69942	µm	Spot	Position	1	S100B+	DAPI+	298
63643.6	45140.7	5.70536	µm	Spot	Position	1	S100B+	DAPI+	299
63643.9	45141.6	5.88676	µm	Spot	Position	1	S100B+	DAPI+	300
63637.5	45162.7	5.94253	µm	Spot	Position	1	S100B+	DAPI+	301
63626.3	45308.2	5.2871	µm	Spot	Position	1	S100B+	DAPI+	302
63624.5	45305.1	5.54926	µm	Spot	Position	1	S100B+	DAPI+	303
63626.1	45311.9	5.95154	µm	Spot	Position	1	S100B+	DAPI+	304
63576.5	45516.2	5.91067	µm	Spot	Position	1	S100B+	DAPI+	305
63675.6	44652.1	6.1309	µm	Spot	Position	1	S100B+	DAPI+	309
63687.4	44664.6	6.22763	µm	Spot	Position	1	S100B+	DAPI+	311
63682.3	44649.1	6.39844	µm	Spot	Position	1	S100B+	DAPI+	313
63664.5	44687	6.63008	µm	Spot	Position	1	S100B+	DAPI+	315
63677.9	44669	6.28937	µm	Spot	Position	1	S100B+	DAPI+	316
63693.2	44672.5	6.16138	µm	Spot	Position	1	S100B+	DAPI+	317
63677.3	44683.3	6.00993	µm	Spot	Position	1	S100B+	DAPI+	318
63693.6	44710.1	6.0403	µm	Spot	Position	1	S100B+	DAPI+	319
63667.9	44694.6	6.47245	µm	Spot	Position	1	S100B+	DAPI+	321
63681.7	44697.3	6.34598	µm	Spot	Position	1	S100B+	DAPI+	322
63694.6	44678.1	6.61624	µm	Spot	Position	1	S100B+	DAPI+	325
63667	44685.3	6.76607	µm	Spot	Position	1	S100B+	DAPI+	326
63695.3	44693.6	6.65448	µm	Spot	Position	1	S100B+	DAPI+	328
63691.1	44711.5	6.7303	µm	Spot	Position	1	S100B+	DAPI+	329
63674	44690.3	6.98835	µm	Spot	Position	1	S100B+	DAPI+	330
63680.2	44722.9	6.17136	µm	Spot	Position	1	S100B+	DAPI+	333
63680.4	44723.6	6.27072	µm	Spot	Position	1	S100B+	DAPI+	334
63674.4	44742.9	6.14827	µm	Spot	Position	1	S100B+	DAPI+	335
63672.6	44748.1	6.22631	µm	Spot	Position	1	S100B+	DAPI+	336
63684.7	44736.6	6.49473	µm	Spot	Position	1	S100B+	DAPI+	337
63683.6	44740.6	6.44576	µm	Spot	Position	1	S100B+	DAPI+	339
63682	44742.3	6.39262	µm	Spot	Position	1	S100B+	DAPI+	340
63676.7	44750.7	6.36297	µm	Spot	Position	1	S100B+	DAPI+	341
63675.4	44754.5	6.54719	µm	Spot	Position	1	S100B+	DAPI+	342
63679.7	44745.4	6.61379	µm	Spot	Position	1	S100B+	DAPI+	343
63677.4	44747.4	6.60608	µm	Spot	Position	1	S100B+	DAPI+	344
63664	44764.5	6.18928	µm	Spot	Position	1	S100B+	DAPI+	346
63664.4	44791.1	6.60856	µm	Spot	Position	1	S100B+	DAPI+	350
63665.6	44768.7	6.09707	µm	Spot	Position	1	S100B+	DAPI+	351
63673.7	44774.1	6.2445	µm	Spot	Position	1	S100B+	DAPI+	352
63667.3	44767.7	6.33806	µm	Spot	Position	1	S100B+	DAPI+	354
63668.8	44770.6	6.52706	µm	Spot	Position	1	S100B+	DAPI+	355
63665.7	44771.6	6.31335	µm	Spot	Position	1	S100B+	DAPI+	356
63671.3	44778.5	6.42009	µm	Spot	Position	1	S100B+	DAPI+	357
63673.4	44782.8	6.4838	µm	Spot	Position	1	S100B+	DAPI+	358
63665.6	44794.2	6.38071	µm	Spot	Position	1	S100B+	DAPI+	359
63674	44800.9	6.51269	µm	Spot	Position	1	S100B+	DAPI+	360
63673.8	44776.9	6.89993	µm	Spot	Position	1	S100B+	DAPI+	361
63672.9	44777.9	7.13684	µm	Spot	Position	1	S100B+	DAPI+	362
63670	44779.2	6.92276	µm	Spot	Position	1	S100B+	DAPI+	363
63671.8	44780.9	6.98127	µm	Spot	Position	1	S100B+	DAPI+	364
63672.1	44804.3	6.92928	µm	Spot	Position	1	S100B+	DAPI+	367
63659.2	44831.3	6.0161	µm	Spot	Position	1	S100B+	DAPI+	369
63661.8	44842.8	6.25751	µm	Spot	Position	1	S100B+	DAPI+	370
63658	44848.8	6.6515	µm	Spot	Position	1	S100B+	DAPI+	372
63667.3	44824.5	6.1518	µm	Spot	Position	1	S100B+	DAPI+	373
63672.1	44835.2	6.17002	µm	Spot	Position	1	S100B+	DAPI+	374
63665	44860.9	6.11058	µm	Spot	Position	1	S100B+	DAPI+	376
63654.2	44864.2	6.21429	µm	Spot	Position	1	S100B+	DAPI+	377
63647.9	44894.2	6.29458	µm	Spot	Position	1	S100B+	DAPI+	379
63652.8	44895.8	6.19642	µm	Spot	Position	1	S100B+	DAPI+	380
63663.5	44881.6	6.87877	µm	Spot	Position	1	S100B+	DAPI+	382
63668.7	44879.1	6.04725	µm	Spot	Position	1	S100B+	DAPI+	383
63669.8	44860.8	6.861	µm	Spot	Position	1	S100B+	DAPI+	384
63668.3	44885	6.78129	µm	Spot	Position	1	S100B+	DAPI+	385
63669.6	44872.8	7.18728	µm	Spot	Position	1	S100B+	DAPI+	386
63669.8	44892.9	6.95779	µm	Spot	Position	1	S100B+	DAPI+	387
63649.8	44903.9	6.12026	µm	Spot	Position	1	S100B+	DAPI+	388
63650.8	44912.1	6.3033	µm	Spot	Position	1	S100B+	DAPI+	389
63658.4	44926.4	6.16181	µm	Spot	Position	1	S100B+	DAPI+	390
63660.8	44943.2	6.11089	µm	Spot	Position	1	S100B+	DAPI+	392
63659.6	44911.8	6.58523	µm	Spot	Position	1	S100B+	DAPI+	393
63659	44942.9	6.3415	µm	Spot	Position	1	S100B+	DAPI+	396
63655.6	44918.8	6.81187	µm	Spot	Position	1	S100B+	DAPI+	400
63657.6	44907.7	6.95145	µm	Spot	Position	1	S100B+	DAPI+	403
63660.8	44912.4	7.08039	µm	Spot	Position	1	S100B+	DAPI+	404
63667.7	44926.2	6.78522	µm	Spot	Position	1	S100B+	DAPI+	408
63657.7	44984.9	6.01041	µm	Spot	Position	1	S100B+	DAPI+	412
63655.7	44990.1	6.16635	µm	Spot	Position	1	S100B+	DAPI+	413
63660.2	44958.8	6.48844	µm	Spot	Position	1	S100B+	DAPI+	414
63658.7	44967.5	6.33267	µm	Spot	Position	1	S100B+	DAPI+	415
63663.6	44972.9	6.54575	µm	Spot	Position	1	S100B+	DAPI+	416
63662.5	44978	6.57683	µm	Spot	Position	1	S100B+	DAPI+	417
63655.7	44961	6.95645	µm	Spot	Position	1	S100B+	DAPI+	418
63666.6	44985.1	6.29755	µm	Spot	Position	1	S100B+	DAPI+	419
63661	44996.6	6.14452	µm	Spot	Position	1	S100B+	DAPI+	420
63662.6	45019.7	6.82591	µm	Spot	Position	1	S100B+	DAPI+	425
63659.6	45024.3	7.14091	µm	Spot	Position	1	S100B+	DAPI+	428
63653	45050.1	6.08545	µm	Spot	Position	1	S100B+	DAPI+	433
63653.1	45055.8	6.02016	µm	Spot	Position	1	S100B+	DAPI+	434
63652	45062.3	6.12733	µm	Spot	Position	1	S100B+	DAPI+	435
63650.6	45076.3	6.01688	µm	Spot	Position	1	S100B+	DAPI+	436
63652	45048.1	6.40498	µm	Spot	Position	1	S100B+	DAPI+	437
63650.8	45060.8	6.34347	µm	Spot	Position	1	S100B+	DAPI+	438
63651.6	45061.1	6.47339	µm	Spot	Position	1	S100B+	DAPI+	439
63649.4	45079.6	6.38346	µm	Spot	Position	1	S100B+	DAPI+	440
63654.5	45038.1	6.72604	µm	Spot	Position	1	S100B+	DAPI+	441
63657.7	45045.1	6.69632	µm	Spot	Position	1	S100B+	DAPI+	442
63655.2	45049.3	6.69372	µm	Spot	Position	1	S100B+	DAPI+	443
63657.4	45052.1	6.93812	µm	Spot	Position	1	S100B+	DAPI+	445
63651.9	45073.5	7.19089	µm	Spot	Position	1	S100B+	DAPI+	447
63644.4	45094	6.30237	µm	Spot	Position	1	S100B+	DAPI+	449
63643.1	45124.3	6.08563	µm	Spot	Position	1	S100B+	DAPI+	451
63644.4	45128.9	6.01707	µm	Spot	Position	1	S100B+	DAPI+	452
63650.3	45116.7	6.33948	µm	Spot	Position	1	S100B+	DAPI+	453
63648.4	45126.5	6.50553	µm	Spot	Position	1	S100B+	DAPI+	454
63642.8	45127	6.49942	µm	Spot	Position	1	S100B+	DAPI+	455
63643.1	45135.5	6.24321	µm	Spot	Position	1	S100B+	DAPI+	457
63645.2	45144.1	6.21832	µm	Spot	Position	1	S100B+	DAPI+	458
63643.1	45145.9	6.23801	µm	Spot	Position	1	S100B+	DAPI+	459
63639.7	45151.3	6.22478	µm	Spot	Position	1	S100B+	DAPI+	460
63637.9	45156.5	6.17875	µm	Spot	Position	1	S100B+	DAPI+	461
63636.9	45159.6	6.03389	µm	Spot	Position	1	S100B+	DAPI+	462
63642.8	45139	6.31789	µm	Spot	Position	1	S100B+	DAPI+	463
63635.6	45153.6	6.34638	µm	Spot	Position	1	S100B+	DAPI+	464
63644.2	45159.3	6.44685	µm	Spot	Position	1	S100B+	DAPI+	465
63646.9	45129.6	6.80841	µm	Spot	Position	1	S100B+	DAPI+	466
63644.6	45140.3	6.81807	µm	Spot	Position	1	S100B+	DAPI+	468
63643.2	45156.7	6.81445	µm	Spot	Position	1	S100B+	DAPI+	471
63642.8	45157.5	6.85969	µm	Spot	Position	1	S100B+	DAPI+	472
63642.8	45150.9	7.0264	µm	Spot	Position	1	S100B+	DAPI+	477
63634.6	45183.2	6.25703	µm	Spot	Position	1	S100B+	DAPI+	478
63633.4	45183.7	6.4985	µm	Spot	Position	1	S100B+	DAPI+	479
63631.9	45183.4	6.70171	µm	Spot	Position	1	S100B+	DAPI+	480
63635.1	45186.8	7.15013	µm	Spot	Position	1	S100B+	DAPI+	481
63632.2	45266.5	7.11582	µm	Spot	Position	1	S100B+	DAPI+	484
63630.6	45267.7	7.13849	µm	Spot	Position	1	S100B+	DAPI+	485
63616.1	45303.3	6.6038	µm	Spot	Position	1	S100B+	DAPI+	486
63616.2	45304.5	7.01971	µm	Spot	Position	1	S100B+	DAPI+	487
63615.6	45305.6	7.06569	µm	Spot	Position	1	S100B+	DAPI+	488
63625.5	45309.8	6.28381	µm	Spot	Position	1	S100B+	DAPI+	489
63595.8	45446.7	6.58441	µm	Spot	Position	1	S100B+	DAPI+	491
63592.4	45451.6	6.49697	µm	Spot	Position	1	S100B+	DAPI+	492
63594.1	45449.4	6.72054	µm	Spot	Position	1	S100B+	DAPI+	493
63596.1	45445.7	7.09597	µm	Spot	Position	1	S100B+	DAPI+	494
63596.4	45447.6	7.00642	µm	Spot	Position	1	S100B+	DAPI+	495
63593	45448.4	7.16307	µm	Spot	Position	1	S100B+	DAPI+	496
63596.6	45449.5	6.98522	µm	Spot	Position	1	S100B+	DAPI+	497
63589	45459.9	6.7614	µm	Spot	Position	1	S100B+	DAPI+	498
63588.5	45461.6	6.95828	µm	Spot	Position	1	S100B+	DAPI+	499
63576.4	45542.3	6.6351	µm	Spot	Position	1	S100B+	DAPI+	501
63563.7	45582.4	7.10571	µm	Spot	Position	1	S100B+	DAPI+	502
63663.9	44855.7	7.49788	µm	Spot	Position	1	S100B+	DAPI+	520
63659.4	44891.9	7.22006	µm	Spot	Position	1	S100B+	DAPI+	521
63651.4	44892.1	7.53802	µm	Spot	Position	1	S100B+	DAPI+	522
63665.1	44895.7	7.55468	µm	Spot	Position	1	S100B+	DAPI+	523
63656.4	44893.5	8.24054	µm	Spot	Position	1	S100B+	DAPI+	525
63667.6	44870.6	7.47847	µm	Spot	Position	1	S100B+	DAPI+	526
63668.7	44887.1	7.351	µm	Spot	Position	1	S100B+	DAPI+	527
63669.4	44895.2	7.4244	µm	Spot	Position	1	S100B+	DAPI+	528
63665.6	44870.2	7.56707	µm	Spot	Position	1	S100B+	DAPI+	529
63670.1	44896.6	7.87915	µm	Spot	Position	1	S100B+	DAPI+	530
63655.2	44904	7.36572	µm	Spot	Position	1	S100B+	DAPI+	532
63657.6	44905.7	7.45529	µm	Spot	Position	1	S100B+	DAPI+	533
63658.8	44899.8	7.79842	µm	Spot	Position	1	S100B+	DAPI+	534
63660	44909	8.08608	µm	Spot	Position	1	S100B+	DAPI+	535
63669.4	44903.5	7.45251	µm	Spot	Position	1	S100B+	DAPI+	537
63665.5	44903.5	7.9786	µm	Spot	Position	1	S100B+	DAPI+	539
63638.4	45166.8	7.24593	µm	Spot	Position	1	S100B+	DAPI+	571
63641.3	45167.2	7.25202	µm	Spot	Position	1	S100B+	DAPI+	572
63632.2	45174.2	7.25601	µm	Spot	Position	1	S100B+	DAPI+	573
63637.8	45185.7	7.88957	µm	Spot	Position	1	S100B+	DAPI+	579
63637.7	45191.5	7.97963	µm	Spot	Position	1	S100B+	DAPI+	580
63638.5	45207.4	8.03144	µm	Spot	Position	1	S100B+	DAPI+	581
63640.2	45215.4	8.14413	µm	Spot	Position	1	S100B+	DAPI+	582
63622.1	45222.9	7.20796	µm	Spot	Position	1	S100B+	DAPI+	584
63630.5	45244.1	7.28726	µm	Spot	Position	1	S100B+	DAPI+	585
63629	45247.2	7.39579	µm	Spot	Position	1	S100B+	DAPI+	586
63633.5	45265.6	7.32966	µm	Spot	Position	1	S100B+	DAPI+	587
63630.7	45241.9	7.68554	µm	Spot	Position	1	S100B+	DAPI+	589
63634.6	45242.8	7.75252	µm	Spot	Position	1	S100B+	DAPI+	590
63628.4	45230.9	7.8849	µm	Spot	Position	1	S100B+	DAPI+	592
63633.5	45231.1	7.88383	µm	Spot	Position	1	S100B+	DAPI+	593
63634.1	45232.9	8.0072	µm	Spot	Position	1	S100B+	DAPI+	594
63632.7	45244	7.81724	µm	Spot	Position	1	S100B+	DAPI+	595
63622.5	45259.5	7.94604	µm	Spot	Position	1	S100B+	DAPI+	596
63629.1	45244.3	8.37163	µm	Spot	Position	1	S100B+	DAPI+	597
63631.3	45248.8	8.15377	µm	Spot	Position	1	S100B+	DAPI+	598
63623.1	45251	8.24778	µm	Spot	Position	1	S100B+	DAPI+	599
63625.9	45257.9	8.10997	µm	Spot	Position	1	S100B+	DAPI+	600
63618.5	45301	7.84553	µm	Spot	Position	1	S100B+	DAPI+	601
63614.7	45308.7	8.05092	µm	Spot	Position	1	S100B+	DAPI+	602
63631.9	45270	7.3607	µm	Spot	Position	1	S100B+	DAPI+	603
63629.6	45276.9	7.42754	µm	Spot	Position	1	S100B+	DAPI+	604
63630.6	45278	7.32808	µm	Spot	Position	1	S100B+	DAPI+	606
63629.8	45280.2	7.42595	µm	Spot	Position	1	S100B+	DAPI+	608
63624.7	45302.9	7.47087	µm	Spot	Position	1	S100B+	DAPI+	609
63629.7	45270.5	7.91334	µm	Spot	Position	1	S100B+	DAPI+	612
63625.3	45295.4	8.09874	µm	Spot	Position	1	S100B+	DAPI+	614
63631.6	45281.6	8.23656	µm	Spot	Position	1	S100B+	DAPI+	616
63628	45295.2	8.22886	µm	Spot	Position	1	S100B+	DAPI+	617
63626.7	45297.2	8.29393	µm	Spot	Position	1	S100B+	DAPI+	618
63609.7	45349.9	7.79224	µm	Spot	Position	1	S100B+	DAPI+	620
63612.8	45344.3	8.08503	µm	Spot	Position	1	S100B+	DAPI+	621
63612.8	45348.6	7.98962	µm	Spot	Position	1	S100B+	DAPI+	622
63607.4	45357.8	7.88317	µm	Spot	Position	1	S100B+	DAPI+	624
63612.3	45342.7	8.12362	µm	Spot	Position	1	S100B+	DAPI+	625
63622	45314.4	7.7795	µm	Spot	Position	1	S100B+	DAPI+	626
63624.7	45314.7	7.97523	µm	Spot	Position	1	S100B+	DAPI+	627
63624.2	45315.7	8.22476	µm	Spot	Position	1	S100B+	DAPI+	628
63611.4	45367.1	7.3449	µm	Spot	Position	1	S100B+	DAPI+	629
63604.3	45368.4	8.07946	µm	Spot	Position	1	S100B+	DAPI+	631
63611.6	45364.6	8.22603	µm	Spot	Position	1	S100B+	DAPI+	632
63605.1	45375.5	8.22534	µm	Spot	Position	1	S100B+	DAPI+	633
63601	45402.3	8.39533	µm	Spot	Position	1	S100B+	DAPI+	634
63601.5	45406.1	8.34386	µm	Spot	Position	1	S100B+	DAPI+	635
63593.6	45447.2	7.32404	µm	Spot	Position	1	S100B+	DAPI+	636
63597.6	45406.8	7.96394	µm	Spot	Position	1	S100B+	DAPI+	637
63602.6	45407.9	8.2553	µm	Spot	Position	1	S100B+	DAPI+	639
63599.3	45422	8.26143	µm	Spot	Position	1	S100B+	DAPI+	640
63600.6	45427.9	8.27519	µm	Spot	Position	1	S100B+	DAPI+	641
63595.5	45437.5	8.22412	µm	Spot	Position	1	S100B+	DAPI+	642
63591.6	45463	7.2309	µm	Spot	Position	1	S100B+	DAPI+	644
63590.3	45454.7	7.70844	µm	Spot	Position	1	S100B+	DAPI+	645
63588.7	45458	7.70903	µm	Spot	Position	1	S100B+	DAPI+	646
63590.3	45461	7.58362	µm	Spot	Position	1	S100B+	DAPI+	647
63589.6	45469.1	7.71244	µm	Spot	Position	1	S100B+	DAPI+	648
63587.7	45475.8	8.03921	µm	Spot	Position	1	S100B+	DAPI+	649
63585.1	45479	8.00517	µm	Spot	Position	1	S100B+	DAPI+	650
63588.3	45483.3	8.00358	µm	Spot	Position	1	S100B+	DAPI+	651
63595.5	45452.9	8.12341	µm	Spot	Position	1	S100B+	DAPI+	652
63585.7	45475.6	8.12397	µm	Spot	Position	1	S100B+	DAPI+	654
63572.5	45518	7.6354	µm	Spot	Position	1	S100B+	DAPI+	656
63577.6	45544.3	7.39077	µm	Spot	Position	1	S100B+	DAPI+	660
63578.2	45511.8	7.70403	µm	Spot	Position	1	S100B+	DAPI+	661
63578.1	45513.7	7.51588	µm	Spot	Position	1	S100B+	DAPI+	663
63585.3	45514.8	7.76836	µm	Spot	Position	1	S100B+	DAPI+	664
63576.7	45515.1	7.71273	µm	Spot	Position	1	S100B+	DAPI+	665
63583.3	45515.7	7.58336	µm	Spot	Position	1	S100B+	DAPI+	666
63578	45543.3	7.63024	µm	Spot	Position	1	S100B+	DAPI+	668
63580.2	45514.3	7.93824	µm	Spot	Position	1	S100B+	DAPI+	669
63578.9	45515.5	7.82346	µm	Spot	Position	1	S100B+	DAPI+	670
63579.8	45516.1	7.84972	µm	Spot	Position	1	S100B+	DAPI+	671
63583.4	45520.3	7.90449	µm	Spot	Position	1	S100B+	DAPI+	672
63577.1	45510.9	8.20627	µm	Spot	Position	1	S100B+	DAPI+	673
63575.7	45511.4	8.29317	µm	Spot	Position	1	S100B+	DAPI+	674
63582.3	45512.3	8.26543	µm	Spot	Position	1	S100B+	DAPI+	675
63584.4	45512.2	8.18746	µm	Spot	Position	1	S100B+	DAPI+	676
63575.1	45516.5	8.17976	µm	Spot	Position	1	S100B+	DAPI+	677
63581.5	45516.7	8.33467	µm	Spot	Position	1	S100B+	DAPI+	678
63586.5	45522.3	8.25648	µm	Spot	Position	1	S100B+	DAPI+	680
63582.4	45524.5	8.14643	µm	Spot	Position	1	S100B+	DAPI+	681
63574.7	45539.4	8.38141	µm	Spot	Position	1	S100B+	DAPI+	684
63577.2	45540.4	8.34904	µm	Spot	Position	1	S100B+	DAPI+	685
63564.1	45586.9	7.97195	µm	Spot	Position	1	S100B+	DAPI+	687
63577.6	45552.7	7.97616	µm	Spot	Position	1	S100B+	DAPI+	688
63574.4	45553	8.05672	µm	Spot	Position	1	S100B+	DAPI+	689
63575.6	45553.1	8.02244	µm	Spot	Position	1	S100B+	DAPI+	690
63574.8	45556.3	8.3255	µm	Spot	Position	1	S100B+	DAPI+	691
63523.5	45844.1	7.98713	µm	Spot	Position	1	S100B+	DAPI+	693
63637.9	45189.2	8.51916	µm	Spot	Position	1	S100B+	DAPI+	729
63632.8	45268.2	8.46583	µm	Spot	Position	1	S100B+	DAPI+	766
63632.2	45275.8	8.45262	µm	Spot	Position	1	S100B+	DAPI+	768
63619.3	45298.7	8.47882	µm	Spot	Position	1	S100B+	DAPI+	769
63614.9	45327.8	8.42883	µm	Spot	Position	1	S100B+	DAPI+	783
63614.8	45345.3	8.5177	µm	Spot	Position	1	S100B+	DAPI+	784
63614.8	45347.6	8.80707	µm	Spot	Position	1	S100B+	DAPI+	785
63611.7	45347.7	8.9095	µm	Spot	Position	1	S100B+	DAPI+	786
63614.4	45349.5	8.91786	µm	Spot	Position	1	S100B+	DAPI+	787
63612.1	45357.9	8.77514	µm	Spot	Position	1	S100B+	DAPI+	788
63615.6	45340.9	9.1116	µm	Spot	Position	1	S100B+	DAPI+	790
63615.8	45343.9	9.11867	µm	Spot	Position	1	S100B+	DAPI+	791
63612	45351.4	9.18174	µm	Spot	Position	1	S100B+	DAPI+	792
63615.9	45350.8	9.47076	µm	Spot	Position	1	S100B+	DAPI+	796
63603.6	45366.2	8.44189	µm	Spot	Position	1	S100B+	DAPI+	798
63603.5	45377.6	8.61109	µm	Spot	Position	1	S100B+	DAPI+	799
63605.2	45370.5	8.77665	µm	Spot	Position	1	S100B+	DAPI+	801
63609.3	45372.5	8.97324	µm	Spot	Position	1	S100B+	DAPI+	802
63606.8	45372.9	8.84425	µm	Spot	Position	1	S100B+	DAPI+	803
63609	45373.3	8.90915	µm	Spot	Position	1	S100B+	DAPI+	804
63601	45379.9	8.90597	µm	Spot	Position	1	S100B+	DAPI+	805
63608.7	45371.6	9.51409	µm	Spot	Position	1	S100B+	DAPI+	806
63608.7	45375.3	9.38381	µm	Spot	Position	1	S100B+	DAPI+	807
63604	45403.5	9.45621	µm	Spot	Position	1	S100B+	DAPI+	808
63597.3	45424.6	8.67602	µm	Spot	Position	1	S100B+	DAPI+	811
63599.3	45411.1	8.99147	µm	Spot	Position	1	S100B+	DAPI+	817
63600.3	45433.2	9.60417	µm	Spot	Position	1	S100B+	DAPI+	819
63600.3	45436.3	9.40797	µm	Spot	Position	1	S100B+	DAPI+	820
63588.3	45463.6	8.46348	µm	Spot	Position	1	S100B+	DAPI+	822
63587.6	45471.6	8.5424	µm	Spot	Position	1	S100B+	DAPI+	823
63585.8	45481.2	8.65835	µm	Spot	Position	1	S100B+	DAPI+	825
63586.5	45491.5	8.98061	µm	Spot	Position	1	S100B+	DAPI+	833
63588.2	45466.9	9.12461	µm	Spot	Position	1	S100B+	DAPI+	835
63589.2	45474.6	9.1638	µm	Spot	Position	1	S100B+	DAPI+	838
63587.1	45485.1	9.08895	µm	Spot	Position	1	S100B+	DAPI+	839
63590.2	45472.7	9.41454	µm	Spot	Position	1	S100B+	DAPI+	841
63572.3	45514.7	8.65633	µm	Spot	Position	1	S100B+	DAPI+	845
63585.1	45511.4	8.61711	µm	Spot	Position	1	S100B+	DAPI+	850
63579.6	45524.1	8.50974	µm	Spot	Position	1	S100B+	DAPI+	851
63583.4	45509.4	8.72268	µm	Spot	Position	1	S100B+	DAPI+	853
63582.2	45523.1	8.92194	µm	Spot	Position	1	S100B+	DAPI+	857
63588.3	45524.5	8.82537	µm	Spot	Position	1	S100B+	DAPI+	859
63582.3	45525.3	8.77965	µm	Spot	Position	1	S100B+	DAPI+	860
63576.7	45542.9	8.82234	µm	Spot	Position	1	S100B+	DAPI+	862
63573.9	45544.6	8.87323	µm	Spot	Position	1	S100B+	DAPI+	863
63579.4	45509.7	9.25939	µm	Spot	Position	1	S100B+	DAPI+	865
63581.9	45511.5	9.06189	µm	Spot	Position	1	S100B+	DAPI+	866
63573.4	45514.8	9.21335	µm	Spot	Position	1	S100B+	DAPI+	868
63578.4	45525.2	9.14482	µm	Spot	Position	1	S100B+	DAPI+	869
63581.4	45525.9	9.2097	µm	Spot	Position	1	S100B+	DAPI+	870
63575	45530.3	9.08994	µm	Spot	Position	1	S100B+	DAPI+	871
63579.6	45530.2	9.19566	µm	Spot	Position	1	S100B+	DAPI+	872
63571.9	45550.8	8.58418	µm	Spot	Position	1	S100B+	DAPI+	874
63571	45553.3	8.55352	µm	Spot	Position	1	S100B+	DAPI+	875
63571.7	45556	8.54084	µm	Spot	Position	1	S100B+	DAPI+	876
63562.8	45588.2	8.56194	µm	Spot	Position	1	S100B+	DAPI+	877
63566.8	45577.6	8.78988	µm	Spot	Position	1	S100B+	DAPI+	879
63568.3	45584.9	8.99023	µm	Spot	Position	1	S100B+	DAPI+	880
63563.8	45590.3	8.77531	µm	Spot	Position	1	S100B+	DAPI+	881
63569	45562	9.24717	µm	Spot	Position	1	S100B+	DAPI+	882
63572.8	45565.8	9.24583	µm	Spot	Position	1	S100B+	DAPI+	883
63567.2	45590.6	9.21596	µm	Spot	Position	1	S100B+	DAPI+	884
63570.8	45548.4	9.4509	µm	Spot	Position	1	S100B+	DAPI+	885
63572.3	45560.7	9.54513	µm	Spot	Position	1	S100B+	DAPI+	886
63568.5	45565.7	9.48885	µm	Spot	Position	1	S100B+	DAPI+	887
63571.7	45566.9	9.3991	µm	Spot	Position	1	S100B+	DAPI+	888
63571.2	45567.9	9.34899	µm	Spot	Position	1	S100B+	DAPI+	889
63570.7	45570.7	9.54518	µm	Spot	Position	1	S100B+	DAPI+	890
63568.1	45574.4	9.30816	µm	Spot	Position	1	S100B+	DAPI+	891
63569.5	45578	9.51581	µm	Spot	Position	1	S100B+	DAPI+	892
63568.6	45578.8	9.42584	µm	Spot	Position	1	S100B+	DAPI+	893
63573.6	45560.9	8.87992	µm	Spot	Position	1	S100B+	DAPI+	897
63573.1	45561.9	8.98467	µm	Spot	Position	1	S100B+	DAPI+	898
63564.8	45593.4	8.6301	µm	Spot	Position	1	S100B+	DAPI+	902
63564.2	45594.7	8.49369	µm	Spot	Position	1	S100B+	DAPI+	903
63561.4	45596.6	8.90925	µm	Spot	Position	1	S100B+	DAPI+	905
63560.2	45611	8.9754	µm	Spot	Position	1	S100B+	DAPI+	906
63560.3	45608.4	9.16569	µm	Spot	Position	1	S100B+	DAPI+	908
63563	45610.6	9.17932	µm	Spot	Position	1	S100B+	DAPI+	910
63561.8	45614.1	9.43215	µm	Spot	Position	1	S100B+	DAPI+	913
63561.3	45615.8	9.4851	µm	Spot	Position	1	S100B+	DAPI+	914
63561.1	45617.7	9.57606	µm	Spot	Position	1	S100B+	DAPI+	915
63541.2	45719.8	9.2225	µm	Spot	Position	1	S100B+	DAPI+	918
63543.3	45717.3	9.57101	µm	Spot	Position	1	S100B+	DAPI+	919
63535.8	45743.2	9.12143	µm	Spot	Position	1	S100B+	DAPI+	920
63525.1	45822.8	8.987	µm	Spot	Position	1	S100B+	DAPI+	925
63525.2	45835.4	8.91133	µm	Spot	Position	1	S100B+	DAPI+	927
63523.3	45838.8	8.70732	µm	Spot	Position	1	S100B+	DAPI+	928
63524.7	45844.3	8.74111	µm	Spot	Position	1	S100B+	DAPI+	929
63523.3	45841.8	9.38209	µm	Spot	Position	1	S100B+	DAPI+	932
63522.4	45846.9	9.4015	µm	Spot	Position	1	S100B+	DAPI+	933
63525.5	45850.8	9.52364	µm	Spot	Position	1	S100B+	DAPI+	934
63527.5	45837.3	8.79854	µm	Spot	Position	1	S100B+	DAPI+	935
63527.2	45832.2	9.02042	µm	Spot	Position	1	S100B+	DAPI+	936
63529.5	45834.9	9.22666	µm	Spot	Position	1	S100B+	DAPI+	937
63530.5	45834.8	9.1333	µm	Spot	Position	1	S100B+	DAPI+	938
63531.6	45836.3	9.09121	µm	Spot	Position	1	S100B+	DAPI+	939
63528.6	45832.7	9.41441	µm	Spot	Position	1	S100B+	DAPI+	940
63527.2	45841.5	9.48601	µm	Spot	Position	1	S100B+	DAPI+	941
63528.2	45874.9	9.20202	µm	Spot	Position	1	S100B+	DAPI+	943
63532.2	45871.1	9.56983	µm	Spot	Position	1	S100B+	DAPI+	944
63529.1	45876.5	9.60558	µm	Spot	Position	1	S100B+	DAPI+	945
63527	45882.6	9.46022	µm	Spot	Position	1	S100B+	DAPI+	946
63617.4	45342.5	9.61796	µm	Spot	Position	1	S100B+	DAPI+	985
63616.6	45346.7	9.85258	µm	Spot	Position	1	S100B+	DAPI+	986
63614.9	45357.3	9.81411	µm	Spot	Position	1	S100B+	DAPI+	987
63611.7	45372.4	9.64913	µm	Spot	Position	1	S100B+	DAPI+	991
63607.2	45378.8	9.80078	µm	Spot	Position	1	S100B+	DAPI+	992
63615.6	45364.6	9.97038	µm	Spot	Position	1	S100B+	DAPI+	995
63604.5	45402.3	10.1259	µm	Spot	Position	1	S100B+	DAPI+	997
63603.3	45406.7	9.84771	µm	Spot	Position	1	S100B+	DAPI+	1002
63600.3	45411	9.70144	µm	Spot	Position	1	S100B+	DAPI+	1003
63600.4	45413.7	9.6122	µm	Spot	Position	1	S100B+	DAPI+	1004
63600.9	45420.9	9.74918	µm	Spot	Position	1	S100B+	DAPI+	1005
63600.9	45429.7	9.75581	µm	Spot	Position	1	S100B+	DAPI+	1006
63601.3	45425.9	10.0742	µm	Spot	Position	1	S100B+	DAPI+	1009
63588.9	45475.9	9.79052	µm	Spot	Position	1	S100B+	DAPI+	1016
63588.3	45484	10.0698	µm	Spot	Position	1	S100B+	DAPI+	1020
63577.3	45518.2	9.78867	µm	Spot	Position	1	S100B+	DAPI+	1024
63577.8	45529.2	9.69611	µm	Spot	Position	1	S100B+	DAPI+	1025
63575.9	45537.6	9.70912	µm	Spot	Position	1	S100B+	DAPI+	1027
63587.7	45517.9	10.1645	µm	Spot	Position	1	S100B+	DAPI+	1028
63576.5	45535.5	10.1542	µm	Spot	Position	1	S100B+	DAPI+	1029
63590.5	45521.5	10.7124	µm	Spot	Position	1	S100B+	DAPI+	1031
63572.4	45548.8	9.68347	µm	Spot	Position	1	S100B+	DAPI+	1034
63569.1	45558	9.79617	µm	Spot	Position	1	S100B+	DAPI+	1035
63570.8	45575.4	9.73126	µm	Spot	Position	1	S100B+	DAPI+	1037
63566.8	45583.7	9.79551	µm	Spot	Position	1	S100B+	DAPI+	1039
63561.7	45588.6	9.72092	µm	Spot	Position	1	S100B+	DAPI+	1040
63566.8	45581.4	9.96612	µm	Spot	Position	1	S100B+	DAPI+	1042
63568.6	45550.9	10.2652	µm	Spot	Position	1	S100B+	DAPI+	1043
63568.5	45554.5	10.3036	µm	Spot	Position	1	S100B+	DAPI+	1044
63575.4	45558.9	9.62276	µm	Spot	Position	1	S100B+	DAPI+	1051
63574.3	45547.6	10.1634	µm	Spot	Position	1	S100B+	DAPI+	1055
63573.6	45553.6	9.99334	µm	Spot	Position	1	S100B+	DAPI+	1057
63573.1	45559.5	9.92001	µm	Spot	Position	1	S100B+	DAPI+	1059
63574.5	45568.7	9.94408	µm	Spot	Position	1	S100B+	DAPI+	1060
63566.1	45592.3	9.81704	µm	Spot	Position	1	S100B+	DAPI+	1064
63559.1	45616.7	9.64848	µm	Spot	Position	1	S100B+	DAPI+	1065
63555.4	45611.7	10.0437	µm	Spot	Position	1	S100B+	DAPI+	1069
63554	45614.3	10.1871	µm	Spot	Position	1	S100B+	DAPI+	1071
63559.9	45619.9	10.3601	µm	Spot	Position	1	S100B+	DAPI+	1077
63555.5	45604.3	10.6186	µm	Spot	Position	1	S100B+	DAPI+	1080
63553.7	45627.7	10.5207	µm	Spot	Position	1	S100B+	DAPI+	1083
63546.9	45653.1	9.76871	µm	Spot	Position	1	S100B+	DAPI+	1086
63550.3	45668.5	10.0729	µm	Spot	Position	1	S100B+	DAPI+	1089
63557.3	45641.3	10.2487	µm	Spot	Position	1	S100B+	DAPI+	1091
63554.2	45648.9	10.4427	µm	Spot	Position	1	S100B+	DAPI+	1092
63548.5	45659.1	10.2499	µm	Spot	Position	1	S100B+	DAPI+	1093
63559.1	45643.4	10.6316	µm	Spot	Position	1	S100B+	DAPI+	1094
63553.3	45643.6	10.6347	µm	Spot	Position	1	S100B+	DAPI+	1095
63550.2	45669.8	10.6482	µm	Spot	Position	1	S100B+	DAPI+	1097
63550.7	45674.8	10.7675	µm	Spot	Position	1	S100B+	DAPI+	1099
63543.4	45683.1	10.5093	µm	Spot	Position	1	S100B+	DAPI+	1100
63543.3	45715.7	9.99623	µm	Spot	Position	1	S100B+	DAPI+	1101
63543.4	45720.5	10.5063	µm	Spot	Position	1	S100B+	DAPI+	1104
63542.8	45725.1	10.5045	µm	Spot	Position	1	S100B+	DAPI+	1105
63548.6	45689.1	10.7329	µm	Spot	Position	1	S100B+	DAPI+	1106
63540.9	45723.4	10.5574	µm	Spot	Position	1	S100B+	DAPI+	1107
63537.8	45730.6	9.6791	µm	Spot	Position	1	S100B+	DAPI+	1108
63534.9	45761.5	10.0726	µm	Spot	Position	1	S100B+	DAPI+	1112
63539.5	45749.2	10.406	µm	Spot	Position	1	S100B+	DAPI+	1113
63537	45764.9	10.2656	µm	Spot	Position	1	S100B+	DAPI+	1114
63536.9	45733.4	10.7319	µm	Spot	Position	1	S100B+	DAPI+	1115
63544	45746.9	10.5896	µm	Spot	Position	1	S100B+	DAPI+	1116
63542.1	45748.2	10.7138	µm	Spot	Position	1	S100B+	DAPI+	1117
63528.9	45790.9	10.7581	µm	Spot	Position	1	S100B+	DAPI+	1118
63525.4	45839	9.77564	µm	Spot	Position	1	S100B+	DAPI+	1120
63521.3	45843.6	9.61352	µm	Spot	Position	1	S100B+	DAPI+	1121
63526.5	45867.4	9.68668	µm	Spot	Position	1	S100B+	DAPI+	1123
63522.9	45849.4	9.94381	µm	Spot	Position	1	S100B+	DAPI+	1124
63525.7	45866.8	10.0749	µm	Spot	Position	1	S100B+	DAPI+	1126
63519.9	45849.4	10.3422	µm	Spot	Position	1	S100B+	DAPI+	1127
63525.7	45865.4	10.3802	µm	Spot	Position	1	S100B+	DAPI+	1129
63528.3	45848.6	9.89915	µm	Spot	Position	1	S100B+	DAPI+	1133
63528.3	45850.3	10.1889	µm	Spot	Position	1	S100B+	DAPI+	1136
63536.5	45821.9	10.2578	µm	Spot	Position	1	S100B+	DAPI+	1139
63532.3	45839.4	10.4881	µm	Spot	Position	1	S100B+	DAPI+	1141
63528	45864.7	10.4877	µm	Spot	Position	1	S100B+	DAPI+	1145
63531.4	45872.6	9.89607	µm	Spot	Position	1	S100B+	DAPI+	1149
63528.1	45886.4	9.99675	µm	Spot	Position	1	S100B+	DAPI+	1150
63530.1	45872.3	10.3327	µm	Spot	Position	1	S100B+	DAPI+	1152
63528.2	45889.2	10.5909	µm	Spot	Position	1	S100B+	DAPI+	1153
63521.7	45946.9	10.6392	µm	Spot	Position	1	S100B+	DAPI+	1154
63554.3	46170.3	9.64608	µm	Spot	Position	1	S100B+	DAPI+	1157
63556.7	45633.1	11.2396	µm	Spot	Position	1	S100B+	DAPI+	1214
63555.5	45637.9	10.9002	µm	Spot	Position	1	S100B+	DAPI+	1219
63556.5	45643.3	11.0533	µm	Spot	Position	1	S100B+	DAPI+	1221
63557.8	45646.3	10.9365	µm	Spot	Position	1	S100B+	DAPI+	1222
63557.7	45647.4	11.1006	µm	Spot	Position	1	S100B+	DAPI+	1223
63541.9	45683	10.9764	µm	Spot	Position	1	S100B+	DAPI+	1225
63557.6	45637.7	11.2344	µm	Spot	Position	1	S100B+	DAPI+	1226
63548.5	45676.6	11.2925	µm	Spot	Position	1	S100B+	DAPI+	1230
63550.9	45639.8	11.5151	µm	Spot	Position	1	S100B+	DAPI+	1231
63544.7	45658.9	11.5449	µm	Spot	Position	1	S100B+	DAPI+	1232
63542.5	45709.9	11.5747	µm	Spot	Position	1	S100B+	DAPI+	1237
63539.4	45704.9	11.8032	µm	Spot	Position	1	S100B+	DAPI+	1239
63535.5	45729.7	10.9405	µm	Spot	Position	1	S100B+	DAPI+	1240
63541	45732.2	10.9434	µm	Spot	Position	1	S100B+	DAPI+	1241
63535.1	45746.9	11.3089	µm	Spot	Position	1	S100B+	DAPI+	1243
63526.4	45856.9	10.8808	µm	Spot	Position	1	S100B+	DAPI+	1252
63519.5	45865.8	10.9719	µm	Spot	Position	1	S100B+	DAPI+	1253
63523.9	45844.4	11.3459	µm	Spot	Position	1	S100B+	DAPI+	1254
63518.8	45851.5	11.172	µm	Spot	Position	1	S100B+	DAPI+	1255
63525.5	45855.2	11.3455	µm	Spot	Position	1	S100B+	DAPI+	1256
63531.9	45831.9	10.9119	µm	Spot	Position	1	S100B+	DAPI+	1259
63534.6	45839.9	10.9441	µm	Spot	Position	1	S100B+	DAPI+	1260
63528.6	45862.7	10.8576	µm	Spot	Position	1	S100B+	DAPI+	1261
63532.3	45829.8	11.3591	µm	Spot	Position	1	S100B+	DAPI+	1262
63530.3	45837.3	11.2891	µm	Spot	Position	1	S100B+	DAPI+	1263
63528	45859.6	11.158	µm	Spot	Position	1	S100B+	DAPI+	1264
63530.9	45834.6	11.5217	µm	Spot	Position	1	S100B+	DAPI+	1268
63532.7	45825	11.708	µm	Spot	Position	1	S100B+	DAPI+	1272
63534.8	45827.9	11.7356	µm	Spot	Position	1	S100B+	DAPI+	1273
63529.3	45903	11.1552	µm	Spot	Position	1	S100B+	DAPI+	1277
63529.8	45902.5	11.5534	µm	Spot	Position	1	S100B+	DAPI+	1278
63527.8	45879.1	11.7768	µm	Spot	Position	1	S100B+	DAPI+	1281
63523.4	45950.5	11.3533	µm	Spot	Position	1	S100B+	DAPI+	1283
63527	45941.5	11.546	µm	Spot	Position	1	S100B+	DAPI+	1285
63528	45938.2	11.8881	µm	Spot	Position	1	S100B+	DAPI+	1286
63527.6	45939.9	11.7616	µm	Spot	Position	1	S100B+	DAPI+	1287
63523.6	45998.4	10.9902	µm	Spot	Position	1	S100B+	DAPI+	1288
63521.7	45986.8	11.3833	µm	Spot	Position	1	S100B+	DAPI+	1289
63514.9	45981.9	11.7026	µm	Spot	Position	1	S100B+	DAPI+	1290
63523.3	45997.1	11.6907	µm	Spot	Position	1	S100B+	DAPI+	1291
63521.1	45998.1	11.4889	µm	Spot	Position	1	S100B+	DAPI+	1292
63522.5	46004.4	11.5465	µm	Spot	Position	1	S100B+	DAPI+	1293
63518.5	45979.9	11.7155	µm	Spot	Position	1	S100B+	DAPI+	1294
63515.4	45980.8	11.9761	µm	Spot	Position	1	S100B+	DAPI+	1295
63520.4	45997.6	11.9066	µm	Spot	Position	1	S100B+	DAPI+	1297
63523.5	46002.9	11.9221	µm	Spot	Position	1	S100B+	DAPI+	1298
63506	46024.5	11.9782	µm	Spot	Position	1	S100B+	DAPI+	1299
63521.9	46107.9	11.5559	µm	Spot	Position	1	S100B+	DAPI+	1300
63504.4	46108.6	11.964	µm	Spot	Position	1	S100B+	DAPI+	1301
63524	45815.3	12.2074	µm	Spot	Position	1	S100B+	DAPI+	1338
63530.8	45795.4	12.1605	µm	Spot	Position	1	S100B+	DAPI+	1340
63532.4	45796.2	12.157	µm	Spot	Position	1	S100B+	DAPI+	1341
63533.5	45811.2	12.297	µm	Spot	Position	1	S100B+	DAPI+	1343
63533.1	45797.1	12.5072	µm	Spot	Position	1	S100B+	DAPI+	1347
63531.6	45794.9	12.6782	µm	Spot	Position	1	S100B+	DAPI+	1349
63532	45817.6	13.0099	µm	Spot	Position	1	S100B+	DAPI+	1352
63529.5	45821.9	13.2007	µm	Spot	Position	1	S100B+	DAPI+	1356
63525.7	45947.1	12.5267	µm	Spot	Position	1	S100B+	DAPI+	1361
63523.2	45946	13.0983	µm	Spot	Position	1	S100B+	DAPI+	1362
63526.6	46004.6	12.0624	µm	Spot	Position	1	S100B+	DAPI+	1365
63523.2	46001.8	12.318	µm	Spot	Position	1	S100B+	DAPI+	1369
63525.7	45989.1	12.8748	µm	Spot	Position	1	S100B+	DAPI+	1374
63520.9	46001.6	12.7682	µm	Spot	Position	1	S100B+	DAPI+	1375
63526.4	46002.1	12.7471	µm	Spot	Position	1	S100B+	DAPI+	1376
63513.8	46005.4	12.9946	µm	Spot	Position	1	S100B+	DAPI+	1379
63521.4	46005.3	12.9185	µm	Spot	Position	1	S100B+	DAPI+	1380
63517.8	46014.1	12.0864	µm	Spot	Position	1	S100B+	DAPI+	1385
63515	46016.2	12.0474	µm	Spot	Position	1	S100B+	DAPI+	1386
63516.5	46013	12.9744	µm	Spot	Position	1	S100B+	DAPI+	1389
63508	46085.2	12.4961	µm	Spot	Position	1	S100B+	DAPI+	1391
63504.6	46096	12.5777	µm	Spot	Position	1	S100B+	DAPI+	1393
63507.9	46095.9	12.4976	µm	Spot	Position	1	S100B+	DAPI+	1394
63517.6	46070.7	12.7512	µm	Spot	Position	1	S100B+	DAPI+	1395
63515.8	46095.1	12.6256	µm	Spot	Position	1	S100B+	DAPI+	1396
63514.4	46067.7	13.1748	µm	Spot	Position	1	S100B+	DAPI+	1397
63520.9	46132.6	12.1617	µm	Spot	Position	1	S100B+	DAPI+	1398
63527.2	46106	12.7759	µm	Spot	Position	1	S100B+	DAPI+	1399
63568.3	46190.6	12.3671	µm	Spot	Position	1	S100B+	DAPI+	1400
63558.9	46186.4	12.9589	µm	Spot	Position	1	S100B+	DAPI+	1401
63616.6	46229	12.3617	µm	Spot	Position	1	S100B+	DAPI+	1403
63595.1	46206.5	13.1569	µm	Spot	Position	1	S100B+	DAPI+	1404
63643.9	46256.9	12.7127	µm	Spot	Position	1	S100B+	DAPI+	1405
63663.2	46286.2	12.9408	µm	Spot	Position	1	S100B+	DAPI+	1406
63804.1	46344.9	12.6671	µm	Spot	Position	1	S100B+	DAPI+	1407
64021	46373.9	12.4021	µm	Spot	Position	1	S100B+	DAPI+	1411
63535	45798.8	13.7466	µm	Spot	Position	1	S100B+	DAPI+	1439
63533.9	45815	13.5656	µm	Spot	Position	1	S100B+	DAPI+	1441
63532.1	45820.4	13.7624	µm	Spot	Position	1	S100B+	DAPI+	1442
63531.8	45812.3	13.8641	µm	Spot	Position	1	S100B+	DAPI+	1444
63523.9	45956.2	13.4746	µm	Spot	Position	1	S100B+	DAPI+	1448
63524.8	45955.2	13.6428	µm	Spot	Position	1	S100B+	DAPI+	1450
63525.8	45973.9	13.4066	µm	Spot	Position	1	S100B+	DAPI+	1456
63518.8	45981.8	13.2381	µm	Spot	Position	1	S100B+	DAPI+	1458
63512.2	45987.1	13.2162	µm	Spot	Position	1	S100B+	DAPI+	1459
63519.7	45992.2	13.2898	µm	Spot	Position	1	S100B+	DAPI+	1461
63521.5	46001	13.4228	µm	Spot	Position	1	S100B+	DAPI+	1462
63523.6	46006.1	13.2957	µm	Spot	Position	1	S100B+	DAPI+	1463
63524.4	46000.4	13.7112	µm	Spot	Position	1	S100B+	DAPI+	1465
63523.7	45983.6	13.9886	µm	Spot	Position	1	S100B+	DAPI+	1466
63516.1	45993.9	13.8648	µm	Spot	Position	1	S100B+	DAPI+	1467
63520.6	45994.7	13.9828	µm	Spot	Position	1	S100B+	DAPI+	1468
63518.1	46006.3	13.9273	µm	Spot	Position	1	S100B+	DAPI+	1469
63527.6	45994.9	13.7327	µm	Spot	Position	1	S100B+	DAPI+	1475
63513.3	46008.9	13.6755	µm	Spot	Position	1	S100B+	DAPI+	1478
63519.3	46008.7	14.0943	µm	Spot	Position	1	S100B+	DAPI+	1479
63511.8	46095.5	13.337	µm	Spot	Position	1	S100B+	DAPI+	1481
63515.5	46079.6	13.8985	µm	Spot	Position	1	S100B+	DAPI+	1483
63518	46086.1	13.8827	µm	Spot	Position	1	S100B+	DAPI+	1484
63502.5	46095	14.1138	µm	Spot	Position	1	S100B+	DAPI+	1486
63530.5	46147.9	13.3924	µm	Spot	Position	1	S100B+	DAPI+	1491
63626	46253.9	14.2578	µm	Spot	Position	1	S100B+	DAPI+	1495
64044.2	46368.4	13.2165	µm	Spot	Position	1	S100B+	DAPI+	1509
63512.5	46078.8	14.4327	µm	Spot	Position	1	S100B+	DAPI+	1530
63511.3	46066.1	14.9787	µm	Spot	Position	1	S100B+	DAPI+	1531
63499.9	46102.6	14.7083	µm	Spot	Position	1	S100B+	DAPI+	1534
63526.5	46119.3	14.4509	µm	Spot	Position	1	S100B+	DAPI+	1535
63614.7	46242.4	15.3459	µm	Spot	Position	1	S100B+	DAPI+	1548
63646.5	46256.5	15.1937	µm	Spot	Position	1	S100B+	DAPI+	1549
63675.9	46271.4	14.4946	µm	Spot	Position	1	S100B+	DAPI+	1550
63944.3	46372.1	15.4769	µm	Spot	Position	1	S100B+	DAPI+	1573
63994.3	46366.1	14.9976	µm	Spot	Position	1	S100B+	DAPI+	1575
63576.2	46213.5	15.7373	µm	Spot	Position	1	S100B+	DAPI+	1597
63630.7	46234.8	16.3415	µm	Spot	Position	1	S100B+	DAPI+	1604
63669.9	46282.4	16.4218	µm	Spot	Position	1	S100B+	DAPI+	1607
63683.1	46285.8	15.7182	µm	Spot	Position	1	S100B+	DAPI+	1608
63772.6	46330.5	15.8004	µm	Spot	Position	1	S100B+	DAPI+	1615
63786	46363.4	15.8594	µm	Spot	Position	1	S100B+	DAPI+	1617
63763.6	46350.9	16.2918	µm	Spot	Position	1	S100B+	DAPI+	1621
64032.7	46369.9	16.3696	µm	Spot	Position	1	S100B+	DAPI+	1636
64040.5	46363.6	16.1591	µm	Spot	Position	1	S100B+	DAPI+	1638
63963.5	46382.8	16.5957	µm	Spot	Position	1	S100B+	DAPI+	1647
63663.7	44608.5	2.34728	µm	Spot	Position	1	S100B-	DAPI+	1
63684.3	44608	2.85703	µm	Spot	Position	1	S100B-	DAPI+	8
63681.8	44609.9	2.87551	µm	Spot	Position	1	S100B-	DAPI+	9
63681.3	44608.5	3.57888	µm	Spot	Position	1	S100B-	DAPI+	11
63672.8	44804.5	3.40405	µm	Spot	Position	1	S100B-	DAPI+	24
63677.5	44621.1	4.16231	µm	Spot	Position	1	S100B-	DAPI+	32
63673.8	44624.7	3.75588	µm	Spot	Position	1	S100B-	DAPI+	35
63690	44625.1	4.65339	µm	Spot	Position	1	S100B-	DAPI+	42
63679.1	44670.7	4.57434	µm	Spot	Position	1	S100B-	DAPI+	59
63676.5	44681.2	4.73652	µm	Spot	Position	1	S100B-	DAPI+	60
63672.9	44797.2	4.44505	µm	Spot	Position	1	S100B-	DAPI+	80
63662.5	44831.3	4.4686	µm	Spot	Position	1	S100B-	DAPI+	87
63672	44607.6	5.39286	µm	Spot	Position	1	S100B-	DAPI+	121
63686.4	44667.1	5.19117	µm	Spot	Position	1	S100B-	DAPI+	132
63676.9	44638.4	5.52693	µm	Spot	Position	1	S100B-	DAPI+	133
63681.8	44643.8	5.7266	µm	Spot	Position	1	S100B-	DAPI+	136
63685.1	44668.5	5.44342	µm	Spot	Position	1	S100B-	DAPI+	151
63687.5	44667.8	5.78322	µm	Spot	Position	1	S100B-	DAPI+	156
63672.4	44755.5	4.83232	µm	Spot	Position	1	S100B-	DAPI+	171
63661.1	44838.6	5.09019	µm	Spot	Position	1	S100B-	DAPI+	210
63662.2	44848.9	5.25712	µm	Spot	Position	1	S100B-	DAPI+	211
63670.5	44824.5	5.78562	µm	Spot	Position	1	S100B-	DAPI+	231
63664.1	44861.6	5.35206	µm	Spot	Position	1	S100B-	DAPI+	234
63669.2	44875.1	5.40027	µm	Spot	Position	1	S100B-	DAPI+	240
63671	44862.3	5.71801	µm	Spot	Position	1	S100B-	DAPI+	244
63663.1	44931.5	5.14991	µm	Spot	Position	1	S100B-	DAPI+	250
63667.3	44933.8	5.66953	µm	Spot	Position	1	S100B-	DAPI+	260
63662.2	44965.6	5.22274	µm	Spot	Position	1	S100B-	DAPI+	266
63658.9	44987.3	5.44797	µm	Spot	Position	1	S100B-	DAPI+	273
63646.1	45117.8	5.54852	µm	Spot	Position	1	S100B-	DAPI+	286
63659.8	44608.9	6.17866	µm	Spot	Position	1	S100B-	DAPI+	306
63689.7	44657.7	6.12899	µm	Spot	Position	1	S100B-	DAPI+	310
63692.8	44660.8	6.74341	µm	Spot	Position	1	S100B-	DAPI+	314
63686.4	44671.2	6.33748	µm	Spot	Position	1	S100B-	DAPI+	320
63677.5	44673.7	6.62061	µm	Spot	Position	1	S100B-	DAPI+	323
63688.6	44674.7	6.87058	µm	Spot	Position	1	S100B-	DAPI+	324
63688.6	44722.7	6.16392	µm	Spot	Position	1	S100B-	DAPI+	332
63670.4	44804.3	6.21174	µm	Spot	Position	1	S100B-	DAPI+	353
63663.5	44822.4	6.07474	µm	Spot	Position	1	S100B-	DAPI+	368
63663.1	44818.9	6.7586	µm	Spot	Position	1	S100B-	DAPI+	371
63662	44871.8	6.01207	µm	Spot	Position	1	S100B-	DAPI+	378
63659	44929.4	6.01208	µm	Spot	Position	1	S100B-	DAPI+	391
63658.3	44932.4	6.37627	µm	Spot	Position	1	S100B-	DAPI+	394
63659	44932.6	6.54551	µm	Spot	Position	1	S100B-	DAPI+	395
63664	44912.7	6.79191	µm	Spot	Position	1	S100B-	DAPI+	398
63662.4	44913.7	6.66398	µm	Spot	Position	1	S100B-	DAPI+	399
63659.5	44934.2	6.72161	µm	Spot	Position	1	S100B-	DAPI+	401
63656.8	44934	7.02244	µm	Spot	Position	1	S100B-	DAPI+	405
63661.7	45026.3	6.61554	µm	Spot	Position	1	S100B-	DAPI+	427
63643.9	45146.3	6.68646	µm	Spot	Position	1	S100B-	DAPI+	470
63647.7	45145.1	7.01422	µm	Spot	Position	1	S100B-	DAPI+	474
63678.8	44676.2	7.42289	µm	Spot	Position	1	S100B-	DAPI+	505
63664.1	44891.9	7.86556	µm	Spot	Position	1	S100B-	DAPI+	524
63665.4	44937.4	7.44178	µm	Spot	Position	1	S100B-	DAPI+	538
63628.5	45278.2	7.44677	µm	Spot	Position	1	S100B-	DAPI+	605
63626.5	45294.3	7.60678	µm	Spot	Position	1	S100B-	DAPI+	610
63621.7	45305	7.75223	µm	Spot	Position	1	S100B-	DAPI+	611
63627.9	45301.2	8.40501	µm	Spot	Position	1	S100B-	DAPI+	619
63610.8	45353.5	7.88502	µm	Spot	Position	1	S100B-	DAPI+	623
63599.3	45434.9	8.01372	µm	Spot	Position	1	S100B-	DAPI+	638
63579	45532.6	8.21407	µm	Spot	Position	1	S100B-	DAPI+	682
63635.7	45220.7	8.46039	µm	Spot	Position	1	S100B-	DAPI+	731
63632.3	45233.5	8.4112	µm	Spot	Position	1	S100B-	DAPI+	742
63611.6	45360	8.93928	µm	Spot	Position	1	S100B-	DAPI+	789
63608.6	45359.5	9.0572	µm	Spot	Position	1	S100B-	DAPI+	794
63603.3	45381.8	8.51146	µm	Spot	Position	1	S100B-	DAPI+	800
63586.5	45523.3	8.83739	µm	Spot	Position	1	S100B-	DAPI+	858
63578.9	45534.4	8.90394	µm	Spot	Position	1	S100B-	DAPI+	861
63569.7	45576.8	8.93125	µm	Spot	Position	1	S100B-	DAPI+	878
63576.4	45550.9	8.8363	µm	Spot	Position	1	S100B-	DAPI+	894
63574.7	45550.4	9.1559	µm	Spot	Position	1	S100B-	DAPI+	899
63564.3	45612.2	8.63773	µm	Spot	Position	1	S100B-	DAPI+	904
63539.9	45746.8	9.3788	µm	Spot	Position	1	S100B-	DAPI+	922
63541.9	45747.6	9.51588	µm	Spot	Position	1	S100B-	DAPI+	923
63526	45834	8.77069	µm	Spot	Position	1	S100B-	DAPI+	926
63524.6	45847.2	9.1106	µm	Spot	Position	1	S100B-	DAPI+	930
63524.6	45848.2	9.13156	µm	Spot	Position	1	S100B-	DAPI+	931
63607.4	45364	10.0732	µm	Spot	Position	1	S100B-	DAPI+	994
63594	45457.6	9.89764	µm	Spot	Position	1	S100B-	DAPI+	1013
63570.6	45573.4	9.71018	µm	Spot	Position	1	S100B-	DAPI+	1036
63571.8	45571	10.1729	µm	Spot	Position	1	S100B-	DAPI+	1041
63573.5	45568.3	9.65665	µm	Spot	Position	1	S100B-	DAPI+	1053
63560.3	45599.3	10.284	µm	Spot	Position	1	S100B-	DAPI+	1075
63560.7	45642.8	10.0451	µm	Spot	Position	1	S100B-	DAPI+	1088
63550	45667	10.7211	µm	Spot	Position	1	S100B-	DAPI+	1096
63548.5	45673.3	10.7403	µm	Spot	Position	1	S100B-	DAPI+	1098
63536.5	45731.9	9.63512	µm	Spot	Position	1	S100B-	DAPI+	1109
63539	45745.9	9.63582	µm	Spot	Position	1	S100B-	DAPI+	1110
63541.1	45747.8	9.66095	µm	Spot	Position	1	S100B-	DAPI+	1111
63524.8	45858	9.70247	µm	Spot	Position	1	S100B-	DAPI+	1122
63523.6	45861.4	10.419	µm	Spot	Position	1	S100B-	DAPI+	1128
63531.6	45841.7	9.77528	µm	Spot	Position	1	S100B-	DAPI+	1130
63532.4	45843.7	9.74114	µm	Spot	Position	1	S100B-	DAPI+	1131
63532	45845.8	9.88075	µm	Spot	Position	1	S100B-	DAPI+	1132
63529.9	45851.6	9.66612	µm	Spot	Position	1	S100B-	DAPI+	1134
63528.9	45853.1	10.166	µm	Spot	Position	1	S100B-	DAPI+	1137
63528	45854.8	10.1499	µm	Spot	Position	1	S100B-	DAPI+	1138
63529.4	45849.1	10.3264	µm	Spot	Position	1	S100B-	DAPI+	1143
63529	45856.3	10.452	µm	Spot	Position	1	S100B-	DAPI+	1144
63551.3	45642.2	11.319	µm	Spot	Position	1	S100B-	DAPI+	1228
63522.4	45859.2	11.1237	µm	Spot	Position	1	S100B-	DAPI+	1257
63522.8	45857.1	11.4976	µm	Spot	Position	1	S100B-	DAPI+	1258
63529.2	45838.4	11.4876	µm	Spot	Position	1	S100B-	DAPI+	1269
63522	45994.8	11.9907	µm	Spot	Position	1	S100B-	DAPI+	1296
63533.7	45828.3	12.2004	µm	Spot	Position	1	S100B-	DAPI+	1353
63522.3	45991.4	13.1647	µm	Spot	Position	1	S100B-	DAPI+	1378
63524.1	45990.3	13.2727	µm	Spot	Position	1	S100B-	DAPI+	1460
63523.4	45995.1	13.7147	µm	Spot	Position	1	S100B-	DAPI+	1464
63524.9	45994.6	14.1763	µm	Spot	Position	1	S100B-	DAPI+	1470
63560.1	46185.2	13.4329	µm	Spot	Position	1	S100B-	DAPI+	1492
63566.7	46178.5	13.7849	µm	Spot	Position	1	S100B-	DAPI+	1493
63537.5	45816.7	14.8034	µm	Spot	Position	1	S100B-	DAPI+	1517
63516.8	46047.4	14.6526	µm	Spot	Position	1	S100B-	DAPI+	1529
63574.2	46183.3	15.1608	µm	Spot	Position	1	S100B-	DAPI+	1540
63587.4	46201.6	14.4849	µm	Spot	Position	1	S100B-	DAPI+	1542
63577.7	46207.6	14.5111	µm	Spot	Position	1	S100B-	DAPI+	1543
63577.9	46208.7	14.6451	µm	Spot	Position	1	S100B-	DAPI+	1544
63587.6	46205.3	15.257	µm	Spot	Position	1	S100B-	DAPI+	1545
63602.8	46229	15.3981	µm	Spot	Position	1	S100B-	DAPI+	1546
63621.6	46230.1	15.6018	µm	Spot	Position	1	S100B-	DAPI+	1547
63600.9	46230.1	15.9731	µm	Spot	Position	1	S100B-	DAPI+	1600
63982.5	46363.3	16.439	µm	Spot	Position	1	S100B-	DAPI+	1632
63999.8	46366.7	16.684	µm	Spot	Position	1	S100B-	DAPI+	1637
63930.7	46378	16.7809	µm	Spot	Position	1	S100B-	DAPI+	1644
63946.2	46376.7	16.201	µm	Spot	Position	1	S100B-	DAPI+	1645
63985.1	46384.5	16.4213	µm	Spot	Position	1	S100B-	DAPI+	1646
63690	44697.4	1.15091	µm	Spot	Position	1	S100B+;S100B-	DAPI+;DAPI-	0

## Sheet: Sample 3-Crym+S100b-Position - 
AC351 Crym 555 S100b 488 R_[ii10_TileScan_1_Merged_Image_11]_Position
Position
====================
Position X	Position Y	Position Z	Unit	Category	Collection	Time	S100b	dapi	ID
92294.4	38437.7	2.96981	µm	Spot	Position	1		DAPI-	2
92293.3	38448.2	3.03543	µm	Spot	Position	1		DAPI-	3
92292.3	38459.5	3.52583	µm	Spot	Position	1		DAPI-	5
92295.6	38436.2	3.96737	µm	Spot	Position	1		DAPI-	9
92294.4	38446.9	4.41699	µm	Spot	Position	1		DAPI-	11
92293.1	38460.5	3.66749	µm	Spot	Position	1		DAPI-	14
92291.3	38458.6	3.98772	µm	Spot	Position	1		DAPI-	15
92300	38504.5	4.46541	µm	Spot	Position	1		DAPI-	16
92302.3	38505	4.69774	µm	Spot	Position	1		DAPI-	17
92309.2	38582.8	4.58942	µm	Spot	Position	1		DAPI-	19
92318.9	38401.6	4.94895	µm	Spot	Position	1		DAPI-	20
92317.5	38403.7	5.23451	µm	Spot	Position	1		DAPI-	22
92320.6	38402	5.60628	µm	Spot	Position	1		DAPI-	23
92318.4	38403.3	5.48666	µm	Spot	Position	1		DAPI-	24
92308.5	38399.2	5.94801	µm	Spot	Position	1		DAPI-	25
92321	38399.2	5.85169	µm	Spot	Position	1		DAPI-	26
92321.7	38399.2	5.97343	µm	Spot	Position	1		DAPI-	27
92317.4	38405.3	5.74291	µm	Spot	Position	1		DAPI-	28
92298.8	38454.3	4.99649	µm	Spot	Position	1		DAPI-	30
92309	38409.8	5.27705	µm	Spot	Position	1		DAPI-	31
92295	38449.8	5.86971	µm	Spot	Position	1		DAPI-	38
92297.3	38482.2	5.19443	µm	Spot	Position	1		DAPI-	39
92301.5	38457.1	5.9446	µm	Spot	Position	1		DAPI-	41
92307.3	38578	4.97494	µm	Spot	Position	1		DAPI-	43
92311.4	38570.8	5.52713	µm	Spot	Position	1		DAPI-	46
92310.6	38589.3	5.90419	µm	Spot	Position	1		DAPI-	47
92290.6	38592.8	5.76413	µm	Spot	Position	1		DAPI-	48
92290.5	38596.4	5.26238	µm	Spot	Position	1		DAPI-	49
92291.4	38594.1	5.8253	µm	Spot	Position	1		DAPI-	52
92319.9	38650.2	4.98736	µm	Spot	Position	1		DAPI-	54
92318.5	38650	5.85161	µm	Spot	Position	1		DAPI-	57
92329.4	38671.6	5.97939	µm	Spot	Position	1		DAPI-	60
92317	38400.7	6.06299	µm	Spot	Position	1		DAPI-	65
92303.3	38393.6	6.3859	µm	Spot	Position	1		DAPI-	68
92306.6	38394.5	6.48734	µm	Spot	Position	1		DAPI-	69
92320	38398.3	6.53328	µm	Spot	Position	1		DAPI-	70
92318.8	38394.4	6.61449	µm	Spot	Position	1		DAPI-	73
92302.1	38394.8	6.96735	µm	Spot	Position	1		DAPI-	76
92318.6	38400.3	7.12841	µm	Spot	Position	1		DAPI-	77
92322.5	38408.4	6.95882	µm	Spot	Position	1		DAPI-	78
92307	38444	6.33075	µm	Spot	Position	1		DAPI-	81
92296.4	38487.9	6.79061	µm	Spot	Position	1		DAPI-	88
92291.1	38592.1	6.17246	µm	Spot	Position	1		DAPI-	93
92307.4	38601.3	6.1093	µm	Spot	Position	1		DAPI-	96
92305.8	38604.2	6.10927	µm	Spot	Position	1		DAPI-	97
92297.7	38606.3	6.93677	µm	Spot	Position	1		DAPI-	104
92321.2	38645.4	6.50364	µm	Spot	Position	1		DAPI-	109
92324.1	38666.6	6.46946	µm	Spot	Position	1		DAPI-	112
92322	38644.5	6.84156	µm	Spot	Position	1		DAPI-	113
92322.9	38674.1	6.81318	µm	Spot	Position	1		DAPI-	114
92322.3	38646	7.0175	µm	Spot	Position	1		DAPI-	115
92321.5	38667.2	7.05012	µm	Spot	Position	1		DAPI-	116
92321.2	38675.8	7.02151	µm	Spot	Position	1		DAPI-	117
92329.7	38669.4	6.71426	µm	Spot	Position	1		DAPI-	118
92312.3	38719.6	7.00216	µm	Spot	Position	1		DAPI-	119
92085.9	39274.1	6.64111	µm	Spot	Position	1		DAPI-	130
92083.4	39270	7.02994	µm	Spot	Position	1		DAPI-	132
92327.6	38448.1	7.42961	µm	Spot	Position	1		DAPI-	144
92303.6	38494.6	7.87746	µm	Spot	Position	1		DAPI-	165
92309.2	38562.2	7.34866	µm	Spot	Position	1		DAPI-	169
92307.8	38563.4	7.34928	µm	Spot	Position	1		DAPI-	171
92305.1	38590.5	7.21744	µm	Spot	Position	1		DAPI-	173
92309.2	38558.1	7.71724	µm	Spot	Position	1		DAPI-	175
92295.8	38584.6	7.64728	µm	Spot	Position	1		DAPI-	176
92298.1	38585.1	7.77421	µm	Spot	Position	1		DAPI-	177
92303.4	38570.3	7.99111	µm	Spot	Position	1		DAPI-	182
92303.4	38588.8	8.1256	µm	Spot	Position	1		DAPI-	186
92304	38614.4	7.36638	µm	Spot	Position	1		DAPI-	188
92314.6	38624.4	7.25167	µm	Spot	Position	1		DAPI-	190
92326.1	38624.3	7.41265	µm	Spot	Position	1		DAPI-	191
92297.6	38608.3	7.77379	µm	Spot	Position	1		DAPI-	194
92314.2	38643.8	7.31227	µm	Spot	Position	1		DAPI-	200
92326	38646.1	7.65405	µm	Spot	Position	1		DAPI-	201
92313.1	38647.1	7.7541	µm	Spot	Position	1		DAPI-	202
92328.4	38667.9	7.89844	µm	Spot	Position	1		DAPI-	203
92323.6	38680.4	8.32185	µm	Spot	Position	1		DAPI-	206
92319.4	38681.2	8.30912	µm	Spot	Position	1		DAPI-	207
92329.1	38647.3	7.67315	µm	Spot	Position	1		DAPI-	208
92334.2	38907.7	7.99887	µm	Spot	Position	1		DAPI-	213
92334.2	38909.1	8.28485	µm	Spot	Position	1		DAPI-	216
92122.1	39248	8.00806	µm	Spot	Position	1		DAPI-	228
92301.2	38493.3	8.65852	µm	Spot	Position	1		DAPI-	267
92305.7	38500.3	8.74422	µm	Spot	Position	1		DAPI-	268
92300.2	38514.2	8.52974	µm	Spot	Position	1		DAPI-	271
92308.8	38564.1	9.03775	µm	Spot	Position	1		DAPI-	281
92294.9	38574.7	9.49183	µm	Spot	Position	1		DAPI-	282
92294.4	38576.3	9.39256	µm	Spot	Position	1		DAPI-	283
92320.6	38671.8	8.4427	µm	Spot	Position	1		DAPI-	296
92352.8	38719.9	9.18816	µm	Spot	Position	1		DAPI-	304
92337.7	38743.3	9.08131	µm	Spot	Position	1		DAPI-	306
92334.6	38905.6	8.45793	µm	Spot	Position	1		DAPI-	318
92333	38909.3	8.67425	µm	Spot	Position	1		DAPI-	319
92228.3	39097.2	9.49083	µm	Spot	Position	1		DAPI-	341
92229	39097.4	9.6032	µm	Spot	Position	1		DAPI-	342
92312.3	38499.3	10.3928	µm	Spot	Position	1		DAPI-	393
92305.1	38512	9.6397	µm	Spot	Position	1		DAPI-	398
92294.7	38571.9	10.0364	µm	Spot	Position	1		DAPI-	404
92295.8	38573.2	10.0998	µm	Spot	Position	1		DAPI-	405
92296.8	38597.7	10.0477	µm	Spot	Position	1		DAPI-	410
92295.3	38603.4	9.91653	µm	Spot	Position	1		DAPI-	411
92339.7	38679	10.0581	µm	Spot	Position	1		DAPI-	412
92369.8	38970	9.86638	µm	Spot	Position	1		DAPI-	443
92229.2	39085.8	10.7814	µm	Spot	Position	1		DAPI-	446
92301.7	38539.1	10.863	µm	Spot	Position	1		DAPI-	482
92305.6	38543	11.0042	µm	Spot	Position	1		DAPI-	483
92305.9	38411	5.8191	µm	Spot	Position	1	S100B+	DAPI+	34
92301.8	38412.4	5.73805	µm	Spot	Position	1	S100B+	DAPI+	35
92300	38421.9	5.89385	µm	Spot	Position	1	S100B+	DAPI+	36
92298.2	38502.3	4.92439	µm	Spot	Position	1	S100B+	DAPI+	42
92308.4	38579.1	5.27092	µm	Spot	Position	1	S100B+	DAPI+	45
92317.8	38643.5	5.48259	µm	Spot	Position	1	S100B+	DAPI+	56
92230.9	39177.4	4.84214	µm	Spot	Position	1	S100B+	DAPI+	62
92313.4	38400.1	6.52119	µm	Spot	Position	1	S100B+	DAPI+	71
92301.9	38424	6.64426	µm	Spot	Position	1	S100B+	DAPI+	82
92308.8	38420	7.17964	µm	Spot	Position	1	S100B+	DAPI+	84
92310.8	38424.4	7.14986	µm	Spot	Position	1	S100B+	DAPI+	85
92311.8	38424.5	7.18995	µm	Spot	Position	1	S100B+	DAPI+	86
92304.1	38506.2	6.33428	µm	Spot	Position	1	S100B+	DAPI+	90
92297	38513.2	7.13884	µm	Spot	Position	1	S100B+	DAPI+	91
92310.6	38583.9	6.15036	µm	Spot	Position	1	S100B+	DAPI+	92
92309.9	38566.6	6.52151	µm	Spot	Position	1	S100B+	DAPI+	94
92318	38583.1	7.12156	µm	Spot	Position	1	S100B+	DAPI+	95
92321.5	38625.6	6.09503	µm	Spot	Position	1	S100B+	DAPI+	98
92305.2	38599.6	7.13778	µm	Spot	Position	1	S100B+	DAPI+	103
92296.9	39063.9	7.18813	µm	Spot	Position	1	S100B+	DAPI+	121
92218.9	39175.5	6.47168	µm	Spot	Position	1	S100B+	DAPI+	122
92176.2	39230.8	6.78784	µm	Spot	Position	1	S100B+	DAPI+	123
92175.1	39233.4	6.67481	µm	Spot	Position	1	S100B+	DAPI+	124
92176.8	39228.6	7.11325	µm	Spot	Position	1	S100B+	DAPI+	126
92162.9	39257.6	6.24629	µm	Spot	Position	1	S100B+	DAPI+	133
92151.1	39247.4	6.83971	µm	Spot	Position	1	S100B+	DAPI+	134
92103	39308.3	6.77708	µm	Spot	Position	1	S100B+	DAPI+	137
92116.1	39287.1	6.99353	µm	Spot	Position	1	S100B+	DAPI+	138
92106.3	39307.1	6.94991	µm	Spot	Position	1	S100B+	DAPI+	139
92321.3	38396.9	7.70884	µm	Spot	Position	1	S100B+	DAPI+	140
92316.4	38449.3	7.38855	µm	Spot	Position	1	S100B+	DAPI+	145
92307.1	38429.9	7.66212	µm	Spot	Position	1	S100B+	DAPI+	147
92318.2	38452.8	7.85743	µm	Spot	Position	1	S100B+	DAPI+	154
92318.6	38416.7	8.30621	µm	Spot	Position	1	S100B+	DAPI+	155
92308.3	38420.4	8.25916	µm	Spot	Position	1	S100B+	DAPI+	156
92324	38454.7	8.23097	µm	Spot	Position	1	S100B+	DAPI+	158
92299.6	38469.1	7.2352	µm	Spot	Position	1	S100B+	DAPI+	159
92304.8	38483.8	7.43808	µm	Spot	Position	1	S100B+	DAPI+	160
92298.9	38465.3	7.70916	µm	Spot	Position	1	S100B+	DAPI+	163
92305.1	38502.7	7.22313	µm	Spot	Position	1	S100B+	DAPI+	166
92312.2	38556.7	7.23712	µm	Spot	Position	1	S100B+	DAPI+	168
92305.3	38563.4	7.35907	µm	Spot	Position	1	S100B+	DAPI+	170
92315.7	38573.8	7.2195	µm	Spot	Position	1	S100B+	DAPI+	172
92311.1	38557.8	7.53028	µm	Spot	Position	1	S100B+	DAPI+	174
92314.7	38585.5	7.63274	µm	Spot	Position	1	S100B+	DAPI+	178
92312.8	38554.3	8.03065	µm	Spot	Position	1	S100B+	DAPI+	181
92303.8	38560.7	8.12528	µm	Spot	Position	1	S100B+	DAPI+	185
92314.9	38606.4	7.41945	µm	Spot	Position	1	S100B+	DAPI+	187
92315.4	38619.2	7.43111	µm	Spot	Position	1	S100B+	DAPI+	189
92318.2	38635.1	8.03403	µm	Spot	Position	1	S100B+	DAPI+	197
92326.8	38809.1	7.64769	µm	Spot	Position	1	S100B+	DAPI+	210
92331.9	38794.6	7.96357	µm	Spot	Position	1	S100B+	DAPI+	211
92332.8	38793.7	8.19094	µm	Spot	Position	1	S100B+	DAPI+	212
92350.2	38990.2	7.8415	µm	Spot	Position	1	S100B+	DAPI+	217
92289.4	39056.2	8.23051	µm	Spot	Position	1	S100B+	DAPI+	218
92169	39157	8.2033	µm	Spot	Position	1	S100B+	DAPI+	220
92157.1	39213.9	7.79313	µm	Spot	Position	1	S100B+	DAPI+	222
92151.7	39220.7	8.12483	µm	Spot	Position	1	S100B+	DAPI+	223
92157.8	39234.5	8.25896	µm	Spot	Position	1	S100B+	DAPI+	224
92192.7	39206.2	7.94242	µm	Spot	Position	1	S100B+	DAPI+	225
92118.8	39285.3	7.75414	µm	Spot	Position	1	S100B+	DAPI+	227
92128.5	39255.8	8.2575	µm	Spot	Position	1	S100B+	DAPI+	229
92125.9	39272.8	8.30158	µm	Spot	Position	1	S100B+	DAPI+	230
92067.2	39317.5	7.85543	µm	Spot	Position	1	S100B+	DAPI+	231
92068.5	39319.1	8.03052	µm	Spot	Position	1	S100B+	DAPI+	232
92086	39298.2	8.22693	µm	Spot	Position	1	S100B+	DAPI+	233
92083.1	39311.5	8.31481	µm	Spot	Position	1	S100B+	DAPI+	234
92067.2	39321	8.33037	µm	Spot	Position	1	S100B+	DAPI+	235
92066.4	39321.3	8.1771	µm	Spot	Position	1	S100B+	DAPI+	236
92070.4	39322.4	8.25543	µm	Spot	Position	1	S100B+	DAPI+	237
92071.7	39322.8	8.27691	µm	Spot	Position	1	S100B+	DAPI+	238
92070.2	39327.2	8.36805	µm	Spot	Position	1	S100B+	DAPI+	239
92117.6	39286.7	7.25976	µm	Spot	Position	1	S100B+	DAPI+	240
92113.4	39289.3	7.68381	µm	Spot	Position	1	S100B+	DAPI+	241
92113.1	39290	7.72795	µm	Spot	Position	1	S100B+	DAPI+	242
92132.8	39312.4	7.7042	µm	Spot	Position	1	S100B+	DAPI+	243
92132.2	39314.7	7.66386	µm	Spot	Position	1	S100B+	DAPI+	244
92112.9	39290.9	7.84908	µm	Spot	Position	1	S100B+	DAPI+	245
92114.4	39288	8.21221	µm	Spot	Position	1	S100B+	DAPI+	247
92101.8	39349.9	7.46696	µm	Spot	Position	1	S100B+	DAPI+	248
92326.5	38417.3	8.69689	µm	Spot	Position	1	S100B+	DAPI+	256
92323.1	38411.8	9.30364	µm	Spot	Position	1	S100B+	DAPI+	258
92317.8	38436.8	9.0954	µm	Spot	Position	1	S100B+	DAPI+	261
92317.9	38579.5	8.48345	µm	Spot	Position	1	S100B+	DAPI+	274
92297.8	38559.2	8.8964	µm	Spot	Position	1	S100B+	DAPI+	276
92310.6	38564.9	8.72753	µm	Spot	Position	1	S100B+	DAPI+	277
92301.5	38556.2	9.29369	µm	Spot	Position	1	S100B+	DAPI+	279
92296.8	38593.9	8.7903	µm	Spot	Position	1	S100B+	DAPI+	285
92320.2	38630.7	8.88999	µm	Spot	Position	1	S100B+	DAPI+	291
92328.8	38637.7	9.30907	µm	Spot	Position	1	S100B+	DAPI+	294
92328.6	38644.1	8.71615	µm	Spot	Position	1	S100B+	DAPI+	297
92337.5	38701.4	9.01182	µm	Spot	Position	1	S100B+	DAPI+	303
92356.8	38757.5	8.49076	µm	Spot	Position	1	S100B+	DAPI+	305
92334	38771.7	9.5448	µm	Spot	Position	1	S100B+	DAPI+	307
92332.4	38803.4	8.43741	µm	Spot	Position	1	S100B+	DAPI+	308
92361.9	38800.1	9.13942	µm	Spot	Position	1	S100B+	DAPI+	309
92363.4	38804.9	9.16555	µm	Spot	Position	1	S100B+	DAPI+	310
92362.7	38809.2	9.50971	µm	Spot	Position	1	S100B+	DAPI+	311
92342.6	38813	9.36533	µm	Spot	Position	1	S100B+	DAPI+	312
92344.1	38813.4	9.41099	µm	Spot	Position	1	S100B+	DAPI+	313
92335.7	38832.7	9.43699	µm	Spot	Position	1	S100B+	DAPI+	315
92358.6	38840.2	9.32115	µm	Spot	Position	1	S100B+	DAPI+	316
92376.7	38862.3	9.47225	µm	Spot	Position	1	S100B+	DAPI+	317
92342.1	38905.8	8.78641	µm	Spot	Position	1	S100B+	DAPI+	320
92343.4	38883.4	9.60048	µm	Spot	Position	1	S100B+	DAPI+	322
92336.1	38904.1	9.46609	µm	Spot	Position	1	S100B+	DAPI+	323
92382	38890.6	9.13058	µm	Spot	Position	1	S100B+	DAPI+	324
92323	38941	9.54307	µm	Spot	Position	1	S100B+	DAPI+	325
92358.9	38959.5	9.21676	µm	Spot	Position	1	S100B+	DAPI+	326
92376.5	38953.6	9.11438	µm	Spot	Position	1	S100B+	DAPI+	327
92318.5	38984.2	8.67122	µm	Spot	Position	1	S100B+	DAPI+	328
92324.6	38986.6	8.6124	µm	Spot	Position	1	S100B+	DAPI+	329
92322.5	38988	8.57506	µm	Spot	Position	1	S100B+	DAPI+	330
92322.2	38989.9	8.73221	µm	Spot	Position	1	S100B+	DAPI+	331
92321.9	38988.2	9.05866	µm	Spot	Position	1	S100B+	DAPI+	332
92321.9	38989	9.08521	µm	Spot	Position	1	S100B+	DAPI+	333
92321.4	38975.4	9.54718	µm	Spot	Position	1	S100B+	DAPI+	334
92322.9	38983	9.47506	µm	Spot	Position	1	S100B+	DAPI+	335
92323.2	38992.7	9.35432	µm	Spot	Position	1	S100B+	DAPI+	336
92348.5	38978.1	8.77569	µm	Spot	Position	1	S100B+	DAPI+	337
92346.7	38987.5	8.90802	µm	Spot	Position	1	S100B+	DAPI+	338
92340.4	38996.5	9.55156	µm	Spot	Position	1	S100B+	DAPI+	339
92300.5	39037.4	9.60534	µm	Spot	Position	1	S100B+	DAPI+	340
92278	39066.3	9.32711	µm	Spot	Position	1	S100B+	DAPI+	344
92219.6	39119.5	8.73734	µm	Spot	Position	1	S100B+	DAPI+	346
92248	39117.3	8.95692	µm	Spot	Position	1	S100B+	DAPI+	349
92172.2	39179.1	8.64265	µm	Spot	Position	1	S100B+	DAPI+	350
92183.2	39155.9	8.79289	µm	Spot	Position	1	S100B+	DAPI+	351
92154.9	39171.4	8.72568	µm	Spot	Position	1	S100B+	DAPI+	352
92189.7	39194.3	8.48703	µm	Spot	Position	1	S100B+	DAPI+	353
92171.6	39209.1	8.78285	µm	Spot	Position	1	S100B+	DAPI+	354
92127.6	39246.1	8.49912	µm	Spot	Position	1	S100B+	DAPI+	356
92132.1	39272.2	8.66809	µm	Spot	Position	1	S100B+	DAPI+	357
92119.1	39280.7	8.61905	µm	Spot	Position	1	S100B+	DAPI+	358
92122.1	39270.5	9.22805	µm	Spot	Position	1	S100B+	DAPI+	359
92100.2	39275.3	9.26802	µm	Spot	Position	1	S100B+	DAPI+	360
92135.6	39278.7	9.08067	µm	Spot	Position	1	S100B+	DAPI+	361
92115.2	39257.3	9.45971	µm	Spot	Position	1	S100B+	DAPI+	362
92065.8	39322.8	8.47328	µm	Spot	Position	1	S100B+	DAPI+	363
92069.1	39322.9	8.53361	µm	Spot	Position	1	S100B+	DAPI+	364
92073.6	39324.1	8.53992	µm	Spot	Position	1	S100B+	DAPI+	365
92067.8	39326.9	8.66506	µm	Spot	Position	1	S100B+	DAPI+	366
92069.4	39328.6	8.45568	µm	Spot	Position	1	S100B+	DAPI+	367
92067.1	39324.6	8.77492	µm	Spot	Position	1	S100B+	DAPI+	368
92068.2	39325	8.95683	µm	Spot	Position	1	S100B+	DAPI+	369
92066	39325.1	8.87382	µm	Spot	Position	1	S100B+	DAPI+	370
92072.5	39325.6	8.76089	µm	Spot	Position	1	S100B+	DAPI+	371
92064.8	39325.9	9.184	µm	Spot	Position	1	S100B+	DAPI+	372
92057.3	39324.5	9.57121	µm	Spot	Position	1	S100B+	DAPI+	373
92099.1	39297	9.14744	µm	Spot	Position	1	S100B+	DAPI+	376
92143.2	39302.7	9.21281	µm	Spot	Position	1	S100B+	DAPI+	377
92139.3	39319.3	9.31668	µm	Spot	Position	1	S100B+	DAPI+	378
92081.5	39348.5	8.56598	µm	Spot	Position	1	S100B+	DAPI+	379
92106.4	39344.3	8.63931	µm	Spot	Position	1	S100B+	DAPI+	380
92099.5	39344.6	8.48905	µm	Spot	Position	1	S100B+	DAPI+	381
92326.7	38433	9.6662	µm	Spot	Position	1	S100B+	DAPI+	385
92326.9	38420.5	10.0515	µm	Spot	Position	1	S100B+	DAPI+	387
92324	38410.6	10.343	µm	Spot	Position	1	S100B+	DAPI+	389
92339.7	38456.8	10.3055	µm	Spot	Position	1	S100B+	DAPI+	395
92338.5	38458	10.728	µm	Spot	Position	1	S100B+	DAPI+	396
92303.6	38536.1	9.81896	µm	Spot	Position	1	S100B+	DAPI+	399
92303.5	38517.1	10.0571	µm	Spot	Position	1	S100B+	DAPI+	401
92316.2	38636.5	9.70539	µm	Spot	Position	1	S100B+	DAPI+	409
92323.4	38731.1	10.5804	µm	Spot	Position	1	S100B+	DAPI+	413
92368.2	38774.7	10.3712	µm	Spot	Position	1	S100B+	DAPI+	414
92379.8	38777.1	10.7615	µm	Spot	Position	1	S100B+	DAPI+	415
92375.1	38813.7	10.1099	µm	Spot	Position	1	S100B+	DAPI+	416
92372.2	38790.8	10.3814	µm	Spot	Position	1	S100B+	DAPI+	417
92343.1	38782.7	10.7373	µm	Spot	Position	1	S100B+	DAPI+	418
92373.3	38795.2	10.6957	µm	Spot	Position	1	S100B+	DAPI+	419
92380.8	38781.7	10.1735	µm	Spot	Position	1	S100B+	DAPI+	420
92389.8	38782.7	9.96959	µm	Spot	Position	1	S100B+	DAPI+	421
92337.3	38828.2	9.85231	µm	Spot	Position	1	S100B+	DAPI+	422
92339.5	38847.7	9.88838	µm	Spot	Position	1	S100B+	DAPI+	423
92364.9	38865.3	10.0533	µm	Spot	Position	1	S100B+	DAPI+	424
92337.1	38826.6	10.2288	µm	Spot	Position	1	S100B+	DAPI+	425
92380.2	38860.3	10.0911	µm	Spot	Position	1	S100B+	DAPI+	426
92394.2	38828.5	10.5435	µm	Spot	Position	1	S100B+	DAPI+	427
92372.1	38878	9.70293	µm	Spot	Position	1	S100B+	DAPI+	428
92369.7	38878.4	9.86977	µm	Spot	Position	1	S100B+	DAPI+	429
92349.1	38890.7	10.0017	µm	Spot	Position	1	S100B+	DAPI+	430
92363.2	38907	10.1558	µm	Spot	Position	1	S100B+	DAPI+	431
92344.7	38909.7	9.97751	µm	Spot	Position	1	S100B+	DAPI+	432
92350.1	38871.2	10.3912	µm	Spot	Position	1	S100B+	DAPI+	433
92356.1	38883.8	10.3279	µm	Spot	Position	1	S100B+	DAPI+	434
92344.9	38904.3	10.3867	µm	Spot	Position	1	S100B+	DAPI+	435
92383.6	38871	9.7591	µm	Spot	Position	1	S100B+	DAPI+	436
92381.6	38871.5	9.8519	µm	Spot	Position	1	S100B+	DAPI+	437
92398.1	38883.5	9.79093	µm	Spot	Position	1	S100B+	DAPI+	438
92340.9	38950.7	9.78107	µm	Spot	Position	1	S100B+	DAPI+	440
92315.6	38984.5	9.81384	µm	Spot	Position	1	S100B+	DAPI+	441
92313.7	38976.8	10.1648	µm	Spot	Position	1	S100B+	DAPI+	442
92305.1	39042.1	10.5743	µm	Spot	Position	1	S100B+	DAPI+	444
92217.8	39092.9	10.0668	µm	Spot	Position	1	S100B+	DAPI+	445
92271	39072.2	10.1587	µm	Spot	Position	1	S100B+	DAPI+	447
92275.1	39067.7	10.6484	µm	Spot	Position	1	S100B+	DAPI+	448
92287.6	39058	10.5058	µm	Spot	Position	1	S100B+	DAPI+	449
92232.8	39120.3	9.65675	µm	Spot	Position	1	S100B+	DAPI+	450
92207.4	39105.2	10.1381	µm	Spot	Position	1	S100B+	DAPI+	451
92205.5	39103.8	10.3548	µm	Spot	Position	1	S100B+	DAPI+	452
92221.4	39108.8	10.2426	µm	Spot	Position	1	S100B+	DAPI+	453
92217.9	39109.4	10.3078	µm	Spot	Position	1	S100B+	DAPI+	454
92215.5	39111	10.246	µm	Spot	Position	1	S100B+	DAPI+	455
92217.5	39123.1	10.3315	µm	Spot	Position	1	S100B+	DAPI+	456
92199.2	39167.6	9.61641	µm	Spot	Position	1	S100B+	DAPI+	457
92210.3	39183.2	9.9698	µm	Spot	Position	1	S100B+	DAPI+	458
92204.6	39187.5	10.4117	µm	Spot	Position	1	S100B+	DAPI+	459
92162.5	39221.6	9.99448	µm	Spot	Position	1	S100B+	DAPI+	460
92172.6	39223.4	10.6836	µm	Spot	Position	1	S100B+	DAPI+	461
92120.5	39277.3	9.93846	µm	Spot	Position	1	S100B+	DAPI+	462
92121.9	39265.1	10.4055	µm	Spot	Position	1	S100B+	DAPI+	463
92100.6	39289.2	9.67792	µm	Spot	Position	1	S100B+	DAPI+	464
92102.2	39314	10.8	µm	Spot	Position	1	S100B+	DAPI+	465
92128	39317.5	10.6369	µm	Spot	Position	1	S100B+	DAPI+	466
92149.1	39290.1	9.76113	µm	Spot	Position	1	S100B+	DAPI+	467
92149.7	39286.9	9.92949	µm	Spot	Position	1	S100B+	DAPI+	468
92116	39336.5	10.0602	µm	Spot	Position	1	S100B+	DAPI+	469
92337.3	38444.9	11.0915	µm	Spot	Position	1	S100B+	DAPI+	479
92333.3	38435.1	11.2889	µm	Spot	Position	1	S100B+	DAPI+	480
92338.3	38777.7	11.4517	µm	Spot	Position	1	S100B+	DAPI+	495
92372.7	38811.5	11.1487	µm	Spot	Position	1	S100B+	DAPI+	496
92395.6	38779.5	10.843	µm	Spot	Position	1	S100B+	DAPI+	497
92390.6	38803.5	11.4806	µm	Spot	Position	1	S100B+	DAPI+	498
92372.9	38882.7	11.1608	µm	Spot	Position	1	S100B+	DAPI+	499
92374.3	38901	11.4672	µm	Spot	Position	1	S100B+	DAPI+	500
92396.6	38896.6	10.9047	µm	Spot	Position	1	S100B+	DAPI+	501
92392.4	38900	11.1142	µm	Spot	Position	1	S100B+	DAPI+	502
92324.5	38951.9	10.9799	µm	Spot	Position	1	S100B+	DAPI+	503
92353.8	38947.3	11.2196	µm	Spot	Position	1	S100B+	DAPI+	504
92378.7	38932.8	11.5944	µm	Spot	Position	1	S100B+	DAPI+	506
92215.2	39152.6	10.9688	µm	Spot	Position	1	S100B+	DAPI+	512
92297.9	38457.7	2.21011	µm	Spot	Position	1	S100B-	DAPI+	1
92288.5	38450.3	3.40269	µm	Spot	Position	1	S100B-	DAPI+	4
92311.8	38578.4	3.5123	µm	Spot	Position	1	S100B-	DAPI+	6
92302.6	38404.4	4.7677	µm	Spot	Position	1	S100B-	DAPI+	7
92293.8	38454.1	3.7199	µm	Spot	Position	1	S100B-	DAPI+	8
92294.5	38445.2	3.99871	µm	Spot	Position	1	S100B-	DAPI+	10
92299.7	38451.6	4.33931	µm	Spot	Position	1	S100B-	DAPI+	12
92298.6	38420.8	4.595	µm	Spot	Position	1	S100B-	DAPI+	13
92309.6	38575.5	4.13375	µm	Spot	Position	1	S100B-	DAPI+	18
92304	38404.9	5.05166	µm	Spot	Position	1	S100B-	DAPI+	21
92296.2	38419.8	4.94494	µm	Spot	Position	1	S100B-	DAPI+	29
92291.7	38445.6	5.20206	µm	Spot	Position	1	S100B-	DAPI+	32
92297.3	38424.6	5.57076	µm	Spot	Position	1	S100B-	DAPI+	33
92310.8	38447	5.76991	µm	Spot	Position	1	S100B-	DAPI+	37
92301.6	38499.8	5.56412	µm	Spot	Position	1	S100B-	DAPI+	40
92312.7	38582.3	4.88619	µm	Spot	Position	1	S100B-	DAPI+	44
92304.4	38602.4	5.24058	µm	Spot	Position	1	S100B-	DAPI+	50
92308.1	38595.2	5.57203	µm	Spot	Position	1	S100B-	DAPI+	51
92316.7	38625.4	6.00005	µm	Spot	Position	1	S100B-	DAPI+	53
92322.7	38651.1	5.37525	µm	Spot	Position	1	S100B-	DAPI+	55
92323.9	38650.6	5.9087	µm	Spot	Position	1	S100B-	DAPI+	58
92322.5	38667.5	5.86049	µm	Spot	Position	1	S100B-	DAPI+	59
92326.8	38825.3	5.58855	µm	Spot	Position	1	S100B-	DAPI+	61
92307.9	38397	6.18489	µm	Spot	Position	1	S100B-	DAPI+	63
92321.7	38398.4	6.04783	µm	Spot	Position	1	S100B-	DAPI+	64
92315	38401.8	6.25077	µm	Spot	Position	1	S100B-	DAPI+	66
92313.8	38402.7	6.05264	µm	Spot	Position	1	S100B-	DAPI+	67
92321.6	38402	6.45746	µm	Spot	Position	1	S100B-	DAPI+	72
92309.9	38397.5	6.79135	µm	Spot	Position	1	S100B-	DAPI+	74
92315.2	38404.6	6.83042	µm	Spot	Position	1	S100B-	DAPI+	75
92296.1	38425.1	6.06727	µm	Spot	Position	1	S100B-	DAPI+	79
92299	38429.2	6.46456	µm	Spot	Position	1	S100B-	DAPI+	80
92320.8	38409.6	7.15401	µm	Spot	Position	1	S100B-	DAPI+	83
92299.2	38481.9	6.4703	µm	Spot	Position	1	S100B-	DAPI+	87
92304.8	38496.5	6.83488	µm	Spot	Position	1	S100B-	DAPI+	89
92322.9	38626.5	6.30615	µm	Spot	Position	1	S100B-	DAPI+	99
92314.4	38626.7	6.33035	µm	Spot	Position	1	S100B-	DAPI+	100
92303.5	38597.2	6.81343	µm	Spot	Position	1	S100B-	DAPI+	101
92324.7	38625.6	6.76053	µm	Spot	Position	1	S100B-	DAPI+	102
92313.3	38613.8	6.96296	µm	Spot	Position	1	S100B-	DAPI+	105
92320.6	38624.8	7.16301	µm	Spot	Position	1	S100B-	DAPI+	106
92318.8	38626.8	6.9947	µm	Spot	Position	1	S100B-	DAPI+	107
92316.2	38642.9	6.50445	µm	Spot	Position	1	S100B-	DAPI+	108
92316.8	38647.6	6.4482	µm	Spot	Position	1	S100B-	DAPI+	110
92317.8	38648.7	6.51591	µm	Spot	Position	1	S100B-	DAPI+	111
92331.3	38850.7	7.05412	µm	Spot	Position	1	S100B-	DAPI+	120
92158.2	39211.9	7.12193	µm	Spot	Position	1	S100B-	DAPI+	125
92088	39273.9	6.2978	µm	Spot	Position	1	S100B-	DAPI+	127
92082.8	39276.6	6.49225	µm	Spot	Position	1	S100B-	DAPI+	128
92083.5	39273.4	6.82018	µm	Spot	Position	1	S100B-	DAPI+	129
92065	39284.1	6.87815	µm	Spot	Position	1	S100B-	DAPI+	131
92145.6	39245.4	7.12669	µm	Spot	Position	1	S100B-	DAPI+	135
92104.2	39306	6.53064	µm	Spot	Position	1	S100B-	DAPI+	136
92303.9	38408.9	7.40319	µm	Spot	Position	1	S100B-	DAPI+	141
92297.7	38411.4	7.20673	µm	Spot	Position	1	S100B-	DAPI+	142
92317.2	38442.2	7.41824	µm	Spot	Position	1	S100B-	DAPI+	143
92314.5	38421.5	7.60742	µm	Spot	Position	1	S100B-	DAPI+	146
92296.9	38435.3	7.59758	µm	Spot	Position	1	S100B-	DAPI+	148
92308.5	38438.5	7.6777	µm	Spot	Position	1	S100B-	DAPI+	149
92300.6	38409.9	8.02002	µm	Spot	Position	1	S100B-	DAPI+	150
92303.9	38421.6	7.92657	µm	Spot	Position	1	S100B-	DAPI+	151
92309.8	38437.2	8.0309	µm	Spot	Position	1	S100B-	DAPI+	152
92298.9	38450.4	8.08095	µm	Spot	Position	1	S100B-	DAPI+	153
92301	38431	8.32586	µm	Spot	Position	1	S100B-	DAPI+	157
92301.4	38495.6	7.45296	µm	Spot	Position	1	S100B-	DAPI+	161
92304.5	38497.7	7.34405	µm	Spot	Position	1	S100B-	DAPI+	162
92301.7	38465.5	7.88151	µm	Spot	Position	1	S100B-	DAPI+	164
92298.5	38512	7.27035	µm	Spot	Position	1	S100B-	DAPI+	167
92308.7	38591.2	7.65345	µm	Spot	Position	1	S100B-	DAPI+	179
92307.8	38593.2	7.55834	µm	Spot	Position	1	S100B-	DAPI+	180
92312.7	38584.6	7.87188	µm	Spot	Position	1	S100B-	DAPI+	183
92305.1	38560	8.16717	µm	Spot	Position	1	S100B-	DAPI+	184
92317.7	38628	7.34017	µm	Spot	Position	1	S100B-	DAPI+	192
92293.9	38595.2	7.54375	µm	Spot	Position	1	S100B-	DAPI+	193
92307.4	38598.4	8.0329	µm	Spot	Position	1	S100B-	DAPI+	195
92315.6	38628.7	8.07972	µm	Spot	Position	1	S100B-	DAPI+	196
92313.6	38603.6	8.36018	µm	Spot	Position	1	S100B-	DAPI+	198
92308.2	38616.8	8.24589	µm	Spot	Position	1	S100B-	DAPI+	199
92320.9	38670.9	7.97233	µm	Spot	Position	1	S100B-	DAPI+	204
92328.4	38651.9	8.39058	µm	Spot	Position	1	S100B-	DAPI+	205
92327.9	38801.8	7.30672	µm	Spot	Position	1	S100B-	DAPI+	209
92334.6	38882.3	8.13474	µm	Spot	Position	1	S100B-	DAPI+	214
92342.2	38892	8.25824	µm	Spot	Position	1	S100B-	DAPI+	215
92223.4	39111.4	7.6447	µm	Spot	Position	1	S100B-	DAPI+	219
92158	39207	7.78366	µm	Spot	Position	1	S100B-	DAPI+	221
92201.8	39198.2	8.33045	µm	Spot	Position	1	S100B-	DAPI+	226
92106.6	39302.9	7.99217	µm	Spot	Position	1	S100B-	DAPI+	246
92099	39342.7	8.12255	µm	Spot	Position	1	S100B-	DAPI+	249
92304.3	38397.1	8.62833	µm	Spot	Position	1	S100B-	DAPI+	250
92311.6	38397.2	8.51695	µm	Spot	Position	1	S100B-	DAPI+	251
92321.9	38408	9.18268	µm	Spot	Position	1	S100B-	DAPI+	252
92314.1	38412.8	8.47108	µm	Spot	Position	1	S100B-	DAPI+	253
92325.4	38415.5	8.69049	µm	Spot	Position	1	S100B-	DAPI+	254
92315.5	38417.2	8.69816	µm	Spot	Position	1	S100B-	DAPI+	255
92308.5	38436.3	8.86153	µm	Spot	Position	1	S100B-	DAPI+	257
92326.8	38426.4	9.04097	µm	Spot	Position	1	S100B-	DAPI+	260
92311.3	38439.1	9.24358	µm	Spot	Position	1	S100B-	DAPI+	262
92309.8	38435.1	9.3244	µm	Spot	Position	1	S100B-	DAPI+	263
92312	38439.4	9.60568	µm	Spot	Position	1	S100B-	DAPI+	264
92333.2	38409.7	9.57269	µm	Spot	Position	1	S100B-	DAPI+	265
92334.6	38427.6	9.34768	µm	Spot	Position	1	S100B-	DAPI+	266
92306	38570.1	8.53478	µm	Spot	Position	1	S100B-	DAPI+	272
92313.2	38579.4	8.66376	µm	Spot	Position	1	S100B-	DAPI+	273
92309	38556.2	8.78323	µm	Spot	Position	1	S100B-	DAPI+	275
92304.9	38591.3	9.00404	µm	Spot	Position	1	S100B-	DAPI+	278
92306.3	38559.2	9.17427	µm	Spot	Position	1	S100B-	DAPI+	280
92307.2	38597	8.44649	µm	Spot	Position	1	S100B-	DAPI+	284
92306.8	38595.9	8.94568	µm	Spot	Position	1	S100B-	DAPI+	286
92313.6	38597.5	8.91158	µm	Spot	Position	1	S100B-	DAPI+	287
92309.6	38598.8	8.88427	µm	Spot	Position	1	S100B-	DAPI+	288
92303.8	38603.5	8.73077	µm	Spot	Position	1	S100B-	DAPI+	289
92308	38608	8.80306	µm	Spot	Position	1	S100B-	DAPI+	290
92327.4	38633.4	8.75836	µm	Spot	Position	1	S100B-	DAPI+	292
92309.2	38597.6	9.0353	µm	Spot	Position	1	S100B-	DAPI+	293
92316	38643.1	8.55278	µm	Spot	Position	1	S100B-	DAPI+	295
92322.4	38672.4	8.89157	µm	Spot	Position	1	S100B-	DAPI+	298
92323.8	38679.1	8.95399	µm	Spot	Position	1	S100B-	DAPI+	299
92319	38644.2	9.45842	µm	Spot	Position	1	S100B-	DAPI+	300
92318.9	38665.5	9.48468	µm	Spot	Position	1	S100B-	DAPI+	301
92330	38673.5	9.47564	µm	Spot	Position	1	S100B-	DAPI+	302
92367.3	38858.2	9.15365	µm	Spot	Position	1	S100B-	DAPI+	314
92335.7	38907.3	9.27928	µm	Spot	Position	1	S100B-	DAPI+	321
92282.2	39057.4	9.43485	µm	Spot	Position	1	S100B-	DAPI+	343
92257.5	39080.3	9.48661	µm	Spot	Position	1	S100B-	DAPI+	345
92214.7	39125.9	9.15652	µm	Spot	Position	1	S100B-	DAPI+	347
92211.5	39141.4	9.53467	µm	Spot	Position	1	S100B-	DAPI+	348
92165.4	39228.5	9.30024	µm	Spot	Position	1	S100B-	DAPI+	355
92108.3	39299.9	8.43945	µm	Spot	Position	1	S100B-	DAPI+	374
92107	39301.8	8.46165	µm	Spot	Position	1	S100B-	DAPI+	375
92101.8	39347.5	8.48813	µm	Spot	Position	1	S100B-	DAPI+	382
92316.7	38415.9	9.64919	µm	Spot	Position	1	S100B-	DAPI+	383
92310.6	38422.4	9.69333	µm	Spot	Position	1	S100B-	DAPI+	384
92317.4	38448.6	9.82274	µm	Spot	Position	1	S100B-	DAPI+	386
92299.5	38493.6	9.76377	µm	Spot	Position	1	S100B-	DAPI+	392
92306	38508.6	9.66588	µm	Spot	Position	1	S100B-	DAPI+	397
92303.9	38513.7	9.93388	µm	Spot	Position	1	S100B-	DAPI+	400
92308.4	38558.7	9.83868	µm	Spot	Position	1	S100B-	DAPI+	403
92307.2	38582.1	10.3125	µm	Spot	Position	1	S100B-	DAPI+	406
92298.7	38578.6	10.6052	µm	Spot	Position	1	S100B-	DAPI+	407
92305.7	38584.4	10.6569	µm	Spot	Position	1	S100B-	DAPI+	408
92402.7	38901.2	10.4489	µm	Spot	Position	1	S100B-	DAPI+	439
92326.5	38415.9	10.9547	µm	Spot	Position	1	S100B-	DAPI+	471
92317.5	38427.5	11.0375	µm	Spot	Position	1	S100B-	DAPI+	472
92299.9	38562.8	10.934	µm	Spot	Position	1	S100B-	DAPI+	486
92297.2	38574.4	10.9544	µm	Spot	Position	1	S100B-	DAPI+	487
92311.9	38560	11.1608	µm	Spot	Position	1	S100B-	DAPI+	488
92296.1	38457.1	1.82064	µm	Spot	Position	1	S100B+;S100B-	DAPI+;DAPI-	0

## Sheet: Sample 1-Dio2+S100b-Position - 
AC335 Dio2 555S100b 488_R_[ii26_TileScan_1_Merged_Image_27]_Position
Position
====================
Position X	Position Y	Position Z	Unit	Category	Collection	Time	dapi	s100b	ID
69914.5	42330.1	3.00685	µm	Spot	Position	1	Class A		69
70641.5	42635.9	2.41851	µm	Spot	Position	1	Class A		97
70975.1	42531.3	5.69386	µm	Spot	Position	1	Class A		336
70316.5	42577.5	5.06896	µm	Spot	Position	1	Class A		348
70727.7	42647.2	5.09927	µm	Spot	Position	1	Class A		412
70754.2	42647.8	4.93473	µm	Spot	Position	1	Class A		425
70490.8	42615.2	6.04818	µm	Spot	Position	1	Class A		578
70953.7	42592.8	6.14241	µm	Spot	Position	1	Class A		592
69978.4	42343.8	10.1649	µm	Spot	Position	1	Class A		768
70921.8	42965.1	0.150101	µm	Spot	Position	1	Class A		770
69791.4	42301.4	0.1501	µm	Spot	Position	1	Class B	S100B+	1
69798.8	42300.7	0.317925	µm	Spot	Position	1	Class B	S100B+	2
69798.8	42303.6	0.873006	µm	Spot	Position	1	Class B	S100B+	3
69778	42309	1.17771	µm	Spot	Position	1	Class B	S100B+	5
69825.7	42315.8	0.1501	µm	Spot	Position	1	Class B	S100B+	6
69884.6	42331.5	0.1501	µm	Spot	Position	1	Class B	S100B+	8
69974	42334	0.1501	µm	Spot	Position	1	Class B	S100B+	9
70461.8	42609.5	0.1501	µm	Spot	Position	1	Class B	S100B+	19
70635.4	42639.2	0.408295	µm	Spot	Position	1	Class B	S100B+	20
70697.7	42647.4	0.1501	µm	Spot	Position	1	Class B	S100B+	21
69819.8	42303.3	1.48034	µm	Spot	Position	1	Class B	S100B+	23
69791.6	42301.5	1.87736	µm	Spot	Position	1	Class B	S100B+	24
69786.9	42310.9	1.36933	µm	Spot	Position	1	Class B	S100B+	28
69808.3	42311.6	1.63544	µm	Spot	Position	1	Class B	S100B+	29
69811.6	42309.4	2.33441	µm	Spot	Position	1	Class B	S100B+	30
69872	42323.5	1.36326	µm	Spot	Position	1	Class B	S100B+	31
69834.3	42319.7	2.10966	µm	Spot	Position	1	Class B	S100B+	32
69862.6	42319.7	2.23265	µm	Spot	Position	1	Class B	S100B+	33
69873.9	42326.9	2.20758	µm	Spot	Position	1	Class B	S100B+	34
69885.1	42329.8	1.62336	µm	Spot	Position	1	Class B	S100B+	35
69877.1	42318.3	2.03715	µm	Spot	Position	1	Class B	S100B+	36
69889.6	42329.1	2.07344	µm	Spot	Position	1	Class B	S100B+	37
69935.9	42327	2.11563	µm	Spot	Position	1	Class B	S100B+	38
69996.9	42359	2.16075	µm	Spot	Position	1	Class B	S100B+	43
70037.2	42372.1	2.08523	µm	Spot	Position	1	Class B	S100B+	44
70039.5	42373.9	2.15979	µm	Spot	Position	1	Class B	S100B+	45
70046.2	42381.3	2.26636	µm	Spot	Position	1	Class B	S100B+	46
71026.5	42355.3	1.32305	µm	Spot	Position	1	Class B	S100B+	47
70660.3	42638.9	2.15869	µm	Spot	Position	1	Class B	S100B+	49
70772.8	42651.8	1.73476	µm	Spot	Position	1	Class B	S100B+	50
71045.8	42199.7	2.86419	µm	Spot	Position	1	Class B	S100B+	52
69748.6	42307	2.97831	µm	Spot	Position	1	Class B	S100B+	55
69761.8	42306.7	3.34869	µm	Spot	Position	1	Class B	S100B+	56
69831.5	42306.5	2.93676	µm	Spot	Position	1	Class B	S100B+	60
69676.9	42311.9	3.0507	µm	Spot	Position	1	Class B	S100B+	62
69772.4	42312.1	3.32429	µm	Spot	Position	1	Class B	S100B+	63
69867.6	42322	3.3785	µm	Spot	Position	1	Class B	S100B+	66
69886.8	42323.7	2.73349	µm	Spot	Position	1	Class B	S100B+	68
69951	42333.1	3.15739	µm	Spot	Position	1	Class B	S100B+	72
70017.4	42368.3	2.45065	µm	Spot	Position	1	Class B	S100B+	76
70038.1	42375.1	3.27244	µm	Spot	Position	1	Class B	S100B+	77
71015.9	42391.4	2.97102	µm	Spot	Position	1	Class B	S100B+	78
71028	42433.1	3.20891	µm	Spot	Position	1	Class B	S100B+	80
70184.2	42499.4	3.54566	µm	Spot	Position	1	Class B	S100B+	83
70191.7	42504	3.37616	µm	Spot	Position	1	Class B	S100B+	84
70287.3	42558.7	2.68706	µm	Spot	Position	1	Class B	S100B+	85
70284.3	42556.8	3.41694	µm	Spot	Position	1	Class B	S100B+	86
70365.5	42596.4	3.54096	µm	Spot	Position	1	Class B	S100B+	87
70471.3	42608.1	3.53061	µm	Spot	Position	1	Class B	S100B+	90
70475.9	42611.5	2.66769	µm	Spot	Position	1	Class B	S100B+	91
70571.7	42624.2	3.51038	µm	Spot	Position	1	Class B	S100B+	93
70603	42625	3.4286	µm	Spot	Position	1	Class B	S100B+	94
70620.9	42628.6	3.28101	µm	Spot	Position	1	Class B	S100B+	95
70645.7	42635.5	2.44017	µm	Spot	Position	1	Class B	S100B+	96
70649.2	42638.2	2.53746	µm	Spot	Position	1	Class B	S100B+	98
70643.4	42638.9	2.42373	µm	Spot	Position	1	Class B	S100B+	99
70642.1	42637.9	2.86454	µm	Spot	Position	1	Class B	S100B+	101
70653.5	42638.7	2.73469	µm	Spot	Position	1	Class B	S100B+	102
70679.6	42642	2.64673	µm	Spot	Position	1	Class B	S100B+	103
70684.4	42648.1	2.82049	µm	Spot	Position	1	Class B	S100B+	104
70663	42640.7	3.40032	µm	Spot	Position	1	Class B	S100B+	105
70697.9	42645.2	3.31248	µm	Spot	Position	1	Class B	S100B+	106
70764.9	42650.8	3.28049	µm	Spot	Position	1	Class B	S100B+	107
70812.4	42662.3	3.24559	µm	Spot	Position	1	Class B	S100B+	108
70814.7	42666.2	3.53924	µm	Spot	Position	1	Class B	S100B+	109
69741.9	42306.9	3.85084	µm	Spot	Position	1	Class B	S100B+	117
69741	42306.8	3.91646	µm	Spot	Position	1	Class B	S100B+	118
69798.4	42308.2	4.74494	µm	Spot	Position	1	Class B	S100B+	120
71031.1	42264.4	4.29572	µm	Spot	Position	1	Class B	S100B+	121
69708.8	42316	3.78139	µm	Spot	Position	1	Class B	S100B+	125
69719.7	42327.2	4.36929	µm	Spot	Position	1	Class B	S100B+	126
69719.7	42332.1	4.31802	µm	Spot	Position	1	Class B	S100B+	127
69775.5	42308.7	4.37538	µm	Spot	Position	1	Class B	S100B+	128
69855.9	42317.5	3.98415	µm	Spot	Position	1	Class B	S100B+	131
69856.9	42327.8	4.66245	µm	Spot	Position	1	Class B	S100B+	132
69927.2	42319.3	4.18582	µm	Spot	Position	1	Class B	S100B+	134
69932.5	42327	3.9397	µm	Spot	Position	1	Class B	S100B+	135
69929	42321.2	4.25225	µm	Spot	Position	1	Class B	S100B+	136
69947.8	42330.3	4.59365	µm	Spot	Position	1	Class B	S100B+	138
70008.6	42356.8	4.49051	µm	Spot	Position	1	Class B	S100B+	146
70047.2	42376.1	4.06215	µm	Spot	Position	1	Class B	S100B+	147
70033.4	42371.1	4.47767	µm	Spot	Position	1	Class B	S100B+	148
70035.2	42373.2	4.58124	µm	Spot	Position	1	Class B	S100B+	149
71015.5	42393.7	3.97269	µm	Spot	Position	1	Class B	S100B+	150
71031.3	42365	3.86363	µm	Spot	Position	1	Class B	S100B+	151
71034.3	42373.2	4.43189	µm	Spot	Position	1	Class B	S100B+	152
71020.2	42401.6	3.63223	µm	Spot	Position	1	Class B	S100B+	158
71024.1	42409.6	4.17699	µm	Spot	Position	1	Class B	S100B+	160
71026.1	42436	4.16479	µm	Spot	Position	1	Class B	S100B+	161
71025.3	42429.4	4.48345	µm	Spot	Position	1	Class B	S100B+	163
71023.9	42433.6	4.35736	µm	Spot	Position	1	Class B	S100B+	164
71021.7	42401.4	4.52575	µm	Spot	Position	1	Class B	S100B+	165
71027.1	42429.3	4.60892	µm	Spot	Position	1	Class B	S100B+	166
70155.4	42465.6	4.09893	µm	Spot	Position	1	Class B	S100B+	169
70153.5	42469	4.36591	µm	Spot	Position	1	Class B	S100B+	170
70155	42464	4.6592	µm	Spot	Position	1	Class B	S100B+	172
70235	42526.6	3.71969	µm	Spot	Position	1	Class B	S100B+	176
70226.6	42519.9	4.09821	µm	Spot	Position	1	Class B	S100B+	178
70249.4	42536.4	4.25354	µm	Spot	Position	1	Class B	S100B+	179
70991.6	42517.5	4.62804	µm	Spot	Position	1	Class B	S100B+	185
70282	42544.3	4.13591	µm	Spot	Position	1	Class B	S100B+	188
70282.6	42547	3.98246	µm	Spot	Position	1	Class B	S100B+	189
70269.3	42546.4	4.68172	µm	Spot	Position	1	Class B	S100B+	193
70294.7	42556.2	4.18351	µm	Spot	Position	1	Class B	S100B+	194
70306.1	42569.1	4.47964	µm	Spot	Position	1	Class B	S100B+	195
70312.7	42571	4.72035	µm	Spot	Position	1	Class B	S100B+	196
70970.6	42553	4.3898	µm	Spot	Position	1	Class B	S100B+	197
70337.8	42589.5	4.034	µm	Spot	Position	1	Class B	S100B+	200
70366	42595.1	4.36105	µm	Spot	Position	1	Class B	S100B+	201
70367.5	42605.7	4.55549	µm	Spot	Position	1	Class B	S100B+	202
70474.1	42611.1	4.44851	µm	Spot	Position	1	Class B	S100B+	204
70474.9	42608.3	4.56623	µm	Spot	Position	1	Class B	S100B+	205
70548.4	42623.1	4.28272	µm	Spot	Position	1	Class B	S100B+	208
70538.5	42616.9	4.5462	µm	Spot	Position	1	Class B	S100B+	209
70596.6	42629.8	3.75846	µm	Spot	Position	1	Class B	S100B+	210
70599.1	42630.9	3.85438	µm	Spot	Position	1	Class B	S100B+	211
70596.9	42628.4	3.95213	µm	Spot	Position	1	Class B	S100B+	213
70623.5	42627.8	3.86423	µm	Spot	Position	1	Class B	S100B+	215
70614.4	42631.3	3.61092	µm	Spot	Position	1	Class B	S100B+	216
70622.4	42636.7	3.75712	µm	Spot	Position	1	Class B	S100B+	218
70658.8	42639.2	3.87368	µm	Spot	Position	1	Class B	S100B+	219
70645.6	42639.6	4.54681	µm	Spot	Position	1	Class B	S100B+	221
70696.5	42639.4	4.49503	µm	Spot	Position	1	Class B	S100B+	222
70702.1	42642.2	4.2808	µm	Spot	Position	1	Class B	S100B+	223
70683.9	42640.7	4.6823	µm	Spot	Position	1	Class B	S100B+	224
70712.2	42643.4	4.11748	µm	Spot	Position	1	Class B	S100B+	225
70716.6	42646.7	4.01473	µm	Spot	Position	1	Class B	S100B+	226
70710.1	42641.5	4.37572	µm	Spot	Position	1	Class B	S100B+	227
70737.5	42648.1	4.78533	µm	Spot	Position	1	Class B	S100B+	228
70747.6	42648.3	4.67255	µm	Spot	Position	1	Class B	S100B+	229
70761	42652.2	4.17811	µm	Spot	Position	1	Class B	S100B+	230
70767	42646.8	4.39463	µm	Spot	Position	1	Class B	S100B+	231
70785.4	42655	4.52588	µm	Spot	Position	1	Class B	S100B+	232
70840.1	42665.4	4.32374	µm	Spot	Position	1	Class B	S100B+	233
70854.8	42665.5	4.18552	µm	Spot	Position	1	Class B	S100B+	234
70848.5	42667.3	4.46014	µm	Spot	Position	1	Class B	S100B+	235
70842.1	42683.3	3.69312	µm	Spot	Position	1	Class B	S100B+	238
70842.7	42686.5	3.76443	µm	Spot	Position	1	Class B	S100B+	239
70847.7	42678.7	3.97233	µm	Spot	Position	1	Class B	S100B+	241
70846.3	42681.4	4.55236	µm	Spot	Position	1	Class B	S100B+	242
70846.9	42686.5	4.75495	µm	Spot	Position	1	Class B	S100B+	243
70860.1	42730.1	4.69016	µm	Spot	Position	1	Class B	S100B+	245
69760.4	42300.2	4.9237	µm	Spot	Position	1	Class B	S100B+	260
69754.5	42304.4	4.92978	µm	Spot	Position	1	Class B	S100B+	261
71036.6	42276.4	5.0084	µm	Spot	Position	1	Class B	S100B+	264
71030	42301.7	5.86709	µm	Spot	Position	1	Class B	S100B+	266
69715.4	42312.7	5.04135	µm	Spot	Position	1	Class B	S100B+	268
69725.5	42337.7	5.17134	µm	Spot	Position	1	Class B	S100B+	269
69727.3	42340.3	5.89337	µm	Spot	Position	1	Class B	S100B+	270
69791	42310.6	5.03527	µm	Spot	Position	1	Class B	S100B+	271
69845.5	42313	5.87229	µm	Spot	Position	1	Class B	S100B+	272
69879	42333.4	5.54984	µm	Spot	Position	1	Class B	S100B+	273
69930.1	42323.3	5.05795	µm	Spot	Position	1	Class B	S100B+	274
69930.1	42319.3	5.77308	µm	Spot	Position	1	Class B	S100B+	275
69923.7	42324.6	5.76118	µm	Spot	Position	1	Class B	S100B+	276
69956.8	42331	5.80978	µm	Spot	Position	1	Class B	S100B+	277
69997.6	42348.1	5.63285	µm	Spot	Position	1	Class B	S100B+	278
70014.9	42368.7	5.52935	µm	Spot	Position	1	Class B	S100B+	286
70038.4	42377.3	5.46447	µm	Spot	Position	1	Class B	S100B+	287
70041.6	42378.1	5.68129	µm	Spot	Position	1	Class B	S100B+	288
71022.5	42392.4	5.30047	µm	Spot	Position	1	Class B	S100B+	290
71027.2	42373.2	5.63774	µm	Spot	Position	1	Class B	S100B+	291
71029.1	42358.7	5.69996	µm	Spot	Position	1	Class B	S100B+	294
70091.2	42410.1	4.91286	µm	Spot	Position	1	Class B	S100B+	295
70093.4	42408.8	5.92145	µm	Spot	Position	1	Class B	S100B+	296
70104.3	42421.1	5.85744	µm	Spot	Position	1	Class B	S100B+	297
70125.1	42445.9	4.81252	µm	Spot	Position	1	Class B	S100B+	298
71021.9	42444.4	5.33978	µm	Spot	Position	1	Class B	S100B+	301
71023.5	42412.5	5.76946	µm	Spot	Position	1	Class B	S100B+	303
70130.1	42454.4	5.74241	µm	Spot	Position	1	Class B	S100B+	306
70131.7	42462.3	5.92735	µm	Spot	Position	1	Class B	S100B+	307
70136.2	42464.1	5.84509	µm	Spot	Position	1	Class B	S100B+	308
70169.8	42489.1	5.54422	µm	Spot	Position	1	Class B	S100B+	310
70173.3	42491.5	5.49094	µm	Spot	Position	1	Class B	S100B+	311
70998.3	42485.4	4.83231	µm	Spot	Position	1	Class B	S100B+	314
71012.4	42456.8	5.10816	µm	Spot	Position	1	Class B	S100B+	316
70229.7	42527.8	4.8961	µm	Spot	Position	1	Class B	S100B+	321
70244.6	42531.9	5.65238	µm	Spot	Position	1	Class B	S100B+	324
70979.2	42538	5.47354	µm	Spot	Position	1	Class B	S100B+	337
70979.4	42512.4	5.76976	µm	Spot	Position	1	Class B	S100B+	339
70971.2	42537.4	5.78699	µm	Spot	Position	1	Class B	S100B+	342
70265.8	42543.6	5.8614	µm	Spot	Position	1	Class B	S100B+	346
70294	42553.4	5.06327	µm	Spot	Position	1	Class B	S100B+	347
70331.9	42583.2	4.9294	µm	Spot	Position	1	Class B	S100B+	349
70313.8	42570	5.95043	µm	Spot	Position	1	Class B	S100B+	350
70973.7	42557.3	4.86862	µm	Spot	Position	1	Class B	S100B+	354
70966.3	42549.9	5.31621	µm	Spot	Position	1	Class B	S100B+	356
70960.9	42551.8	5.33604	µm	Spot	Position	1	Class B	S100B+	357
70971.9	42551.8	5.69982	µm	Spot	Position	1	Class B	S100B+	360
70372.2	42605.2	5.80209	µm	Spot	Position	1	Class B	S100B+	369
70427.6	42611.8	5.90895	µm	Spot	Position	1	Class B	S100B+	371
70412	42613.9	5.72627	µm	Spot	Position	1	Class B	S100B+	372
70477.4	42612.2	4.89651	µm	Spot	Position	1	Class B	S100B+	374
70512.4	42615.5	5.37917	µm	Spot	Position	1	Class B	S100B+	375
70562.4	42620.1	4.98195	µm	Spot	Position	1	Class B	S100B+	376
70550.7	42620.4	4.95228	µm	Spot	Position	1	Class B	S100B+	377
70548.6	42626.5	5.63776	µm	Spot	Position	1	Class B	S100B+	378
70536.5	42616.5	5.72316	µm	Spot	Position	1	Class B	S100B+	380
70544.7	42620.9	5.86898	µm	Spot	Position	1	Class B	S100B+	381
70592.5	42629	5.06923	µm	Spot	Position	1	Class B	S100B+	382
70581.1	42630.2	5.2106	µm	Spot	Position	1	Class B	S100B+	383
70597	42625.4	5.99857	µm	Spot	Position	1	Class B	S100B+	384
70588.2	42625.9	5.77936	µm	Spot	Position	1	Class B	S100B+	385
70949.6	42598.1	5.09024	µm	Spot	Position	1	Class B	S100B+	386
70948.4	42604.3	5.41913	µm	Spot	Position	1	Class B	S100B+	387
70943.4	42607.9	5.72052	µm	Spot	Position	1	Class B	S100B+	388
70937	42616.1	5.74238	µm	Spot	Position	1	Class B	S100B+	389
70593.7	42632.3	5.92019	µm	Spot	Position	1	Class B	S100B+	390
70647.7	42633.6	4.81933	µm	Spot	Position	1	Class B	S100B+	391
70646.4	42632.9	5.25943	µm	Spot	Position	1	Class B	S100B+	393
70643.1	42634.3	5.56546	µm	Spot	Position	1	Class B	S100B+	394
70618.3	42638.1	5.58095	µm	Spot	Position	1	Class B	S100B+	395
70623.2	42634.9	5.73477	µm	Spot	Position	1	Class B	S100B+	396
70655	42635.7	5.87598	µm	Spot	Position	1	Class B	S100B+	397
70654.4	42637.4	5.78234	µm	Spot	Position	1	Class B	S100B+	398
70643.3	42640.1	5.90515	µm	Spot	Position	1	Class B	S100B+	399
70664.6	42638.7	5.09313	µm	Spot	Position	1	Class B	S100B+	400
70665.1	42639.8	4.85269	µm	Spot	Position	1	Class B	S100B+	401
70703.1	42639.7	5.09248	µm	Spot	Position	1	Class B	S100B+	402
70695.5	42641.6	5.10912	µm	Spot	Position	1	Class B	S100B+	404
70661.1	42638.3	5.58389	µm	Spot	Position	1	Class B	S100B+	405
70691.2	42644.5	5.40863	µm	Spot	Position	1	Class B	S100B+	406
70683.6	42638.4	5.9604	µm	Spot	Position	1	Class B	S100B+	408
70686.7	42639.1	5.9289	µm	Spot	Position	1	Class B	S100B+	409
70671.7	42640.6	5.79019	µm	Spot	Position	1	Class B	S100B+	410
70723.3	42646	4.81046	µm	Spot	Position	1	Class B	S100B+	411
70730.2	42649.2	5.03369	µm	Spot	Position	1	Class B	S100B+	413
70746.9	42650.1	5.05287	µm	Spot	Position	1	Class B	S100B+	414
70711	42637.4	5.28245	µm	Spot	Position	1	Class B	S100B+	415
70735.4	42651	5.23566	µm	Spot	Position	1	Class B	S100B+	416
70713.5	42639.8	5.65254	µm	Spot	Position	1	Class B	S100B+	418
70716.7	42644.1	5.61964	µm	Spot	Position	1	Class B	S100B+	419
70739.1	42646.7	5.44542	µm	Spot	Position	1	Class B	S100B+	420
70727.8	42642.3	5.88778	µm	Spot	Position	1	Class B	S100B+	421
70724.3	42647.6	5.76972	µm	Spot	Position	1	Class B	S100B+	422
70751	42647.5	5.71949	µm	Spot	Position	1	Class B	S100B+	423
70760.5	42646.6	4.88487	µm	Spot	Position	1	Class B	S100B+	424
70756.1	42650.8	4.98744	µm	Spot	Position	1	Class B	S100B+	426
70756.3	42654.4	5.19195	µm	Spot	Position	1	Class B	S100B+	427
70784.2	42654.8	5.30506	µm	Spot	Position	1	Class B	S100B+	428
70771	42652	5.60926	µm	Spot	Position	1	Class B	S100B+	429
70778.9	42652	5.61862	µm	Spot	Position	1	Class B	S100B+	430
70763.2	42648.6	5.8758	µm	Spot	Position	1	Class B	S100B+	431
70813	42653.2	5.01033	µm	Spot	Position	1	Class B	S100B+	432
70803.1	42659	5.57146	µm	Spot	Position	1	Class B	S100B+	433
70838.4	42666.9	5.74591	µm	Spot	Position	1	Class B	S100B+	435
70859.9	42666	5.00336	µm	Spot	Position	1	Class B	S100B+	436
70924.8	42634.1	5.56258	µm	Spot	Position	1	Class B	S100B+	439
70842.3	42682.1	5.79935	µm	Spot	Position	1	Class B	S100B+	441
70859.1	42723.9	5.01509	µm	Spot	Position	1	Class B	S100B+	442
70859	42719.5	5.35931	µm	Spot	Position	1	Class B	S100B+	443
70845.6	42685.2	5.60482	µm	Spot	Position	1	Class B	S100B+	446
70873.4	42722.8	5.70065	µm	Spot	Position	1	Class B	S100B+	447
70879.9	42682.1	5.99892	µm	Spot	Position	1	Class B	S100B+	448
70861.8	42727.9	5.17456	µm	Spot	Position	1	Class B	S100B+	450
70861.2	42730.3	5.2871	µm	Spot	Position	1	Class B	S100B+	451
70865.6	42728	5.92883	µm	Spot	Position	1	Class B	S100B+	452
71043.7	42216.2	6.56078	µm	Spot	Position	1	Class B	S100B+	458
69720.6	42307.9	6.91263	µm	Spot	Position	1	Class B	S100B+	461
69751.7	42294.7	6.66258	µm	Spot	Position	1	Class B	S100B+	464
69750.5	42303.8	6.88947	µm	Spot	Position	1	Class B	S100B+	465
69761.8	42294.9	7.16211	µm	Spot	Position	1	Class B	S100B+	466
69804.6	42307.4	6.76826	µm	Spot	Position	1	Class B	S100B+	467
71038.9	42277.8	6.16114	µm	Spot	Position	1	Class B	S100B+	470
71046.5	42284.8	6.28048	µm	Spot	Position	1	Class B	S100B+	471
69685.8	42324.4	6.19308	µm	Spot	Position	1	Class B	S100B+	473
69716.7	42342.9	6.1013	µm	Spot	Position	1	Class B	S100B+	475
69841.3	42315.3	6.80944	µm	Spot	Position	1	Class B	S100B+	477
69918.5	42314.2	6.0704	µm	Spot	Position	1	Class B	S100B+	478
69915.6	42314.9	6.79988	µm	Spot	Position	1	Class B	S100B+	481
69914.2	42325.5	6.8223	µm	Spot	Position	1	Class B	S100B+	482
69880	42331.9	6.99197	µm	Spot	Position	1	Class B	S100B+	483
69920.8	42326.1	6.05042	µm	Spot	Position	1	Class B	S100B+	484
70009.8	42360.4	6.32594	µm	Spot	Position	1	Class B	S100B+	488
70037.6	42369.6	6.1754	µm	Spot	Position	1	Class B	S100B+	489
70035.6	42371.6	6.2097	µm	Spot	Position	1	Class B	S100B+	490
70037.2	42377.5	6.38627	µm	Spot	Position	1	Class B	S100B+	491
70053.6	42386.5	6.48233	µm	Spot	Position	1	Class B	S100B+	492
70040.1	42374.8	6.65191	µm	Spot	Position	1	Class B	S100B+	494
70055.8	42386.9	6.73508	µm	Spot	Position	1	Class B	S100B+	495
71021.1	42357	7.05967	µm	Spot	Position	1	Class B	S100B+	497
70090.1	42404.1	6.11209	µm	Spot	Position	1	Class B	S100B+	500
70099.6	42412.3	6.66438	µm	Spot	Position	1	Class B	S100B+	501
71014.9	42408.6	6.317	µm	Spot	Position	1	Class B	S100B+	506
71025.5	42426.2	6.55385	µm	Spot	Position	1	Class B	S100B+	508
71014.5	42444.5	6.69052	µm	Spot	Position	1	Class B	S100B+	509
70132.3	42464.5	6.08335	µm	Spot	Position	1	Class B	S100B+	516
70131.5	42456.1	6.34088	µm	Spot	Position	1	Class B	S100B+	518
70137.2	42461.4	6.37014	µm	Spot	Position	1	Class B	S100B+	519
70192.3	42491.4	6.03332	µm	Spot	Position	1	Class B	S100B+	520
71007.1	42462.4	6.17829	µm	Spot	Position	1	Class B	S100B+	522
71010	42464.8	6.64162	µm	Spot	Position	1	Class B	S100B+	526
71011.3	42454.4	7.18551	µm	Spot	Position	1	Class B	S100B+	528
71011.1	42456.5	7.15785	µm	Spot	Position	1	Class B	S100B+	529
70991.6	42485.9	6.94346	µm	Spot	Position	1	Class B	S100B+	533
70269.2	42537.7	6.27966	µm	Spot	Position	1	Class B	S100B+	535
70981.9	42535.6	7.03319	µm	Spot	Position	1	Class B	S100B+	542
70988.4	42502.4	6.09215	µm	Spot	Position	1	Class B	S100B+	543
70991.4	42511.2	6.50419	µm	Spot	Position	1	Class B	S100B+	544
70990.9	42517.8	7.07743	µm	Spot	Position	1	Class B	S100B+	547
70264.5	42549.4	6.12776	µm	Spot	Position	1	Class B	S100B+	549
70279.4	42553.2	6.57689	µm	Spot	Position	1	Class B	S100B+	550
70972.2	42542.2	6.53662	µm	Spot	Position	1	Class B	S100B+	554
70971.5	42555.7	6.5502	µm	Spot	Position	1	Class B	S100B+	558
70422.5	42615.4	6.0646	µm	Spot	Position	1	Class B	S100B+	573
70471.1	42615	6.4631	µm	Spot	Position	1	Class B	S100B+	576
70465.9	42611.5	7.16162	µm	Spot	Position	1	Class B	S100B+	577
70555.9	42622.4	6.22808	µm	Spot	Position	1	Class B	S100B+	580
70532.3	42617.2	6.40065	µm	Spot	Position	1	Class B	S100B+	581
70604.2	42625.8	6.05763	µm	Spot	Position	1	Class B	S100B+	582
70581.4	42623.4	6.55226	µm	Spot	Position	1	Class B	S100B+	583
70569.6	42627.2	6.59657	µm	Spot	Position	1	Class B	S100B+	584
70607.4	42626.3	6.75809	µm	Spot	Position	1	Class B	S100B+	585
70626.4	42628	6.01704	µm	Spot	Position	1	Class B	S100B+	586
70935.1	42616.4	6.903	µm	Spot	Position	1	Class B	S100B+	590
70924.5	42616.2	7.12158	µm	Spot	Position	1	Class B	S100B+	591
70944.8	42602.5	6.14349	µm	Spot	Position	1	Class B	S100B+	593
70954.2	42599.2	6.75534	µm	Spot	Position	1	Class B	S100B+	594
70948.2	42600.8	6.61018	µm	Spot	Position	1	Class B	S100B+	595
70953.6	42605	7.04384	µm	Spot	Position	1	Class B	S100B+	597
70623.6	42637.6	6.21945	µm	Spot	Position	1	Class B	S100B+	598
70693.4	42645.1	6.27026	µm	Spot	Position	1	Class B	S100B+	600
70698.7	42636.9	6.41506	µm	Spot	Position	1	Class B	S100B+	601
70698.1	42643.2	6.53167	µm	Spot	Position	1	Class B	S100B+	603
70709.1	42637.9	6.10701	µm	Spot	Position	1	Class B	S100B+	604
70725.7	42645.6	6.39769	µm	Spot	Position	1	Class B	S100B+	605
70744.4	42648	6.73324	µm	Spot	Position	1	Class B	S100B+	606
70748.5	42649.5	7.17014	µm	Spot	Position	1	Class B	S100B+	608
70751	42651.3	7.03782	µm	Spot	Position	1	Class B	S100B+	609
70757.7	42649	6.10834	µm	Spot	Position	1	Class B	S100B+	610
70776.1	42648.8	6.3122	µm	Spot	Position	1	Class B	S100B+	611
70780.9	42655	6.42739	µm	Spot	Position	1	Class B	S100B+	612
70791.5	42657.2	6.65869	µm	Spot	Position	1	Class B	S100B+	613
70831.6	42664.3	6.1157	µm	Spot	Position	1	Class B	S100B+	614
70801.2	42658.3	6.44636	µm	Spot	Position	1	Class B	S100B+	615
70839.1	42663.2	6.36754	µm	Spot	Position	1	Class B	S100B+	616
70842.4	42667.6	6.48552	µm	Spot	Position	1	Class B	S100B+	617
70835.6	42661.5	7.19396	µm	Spot	Position	1	Class B	S100B+	618
70870.7	42662.8	6.13027	µm	Spot	Position	1	Class B	S100B+	619
70849.3	42676.1	6.40432	µm	Spot	Position	1	Class B	S100B+	620
70845.8	42665.5	6.76358	µm	Spot	Position	1	Class B	S100B+	621
70860.5	42669.1	6.6798	µm	Spot	Position	1	Class B	S100B+	622
70853.6	42663.7	7.13805	µm	Spot	Position	1	Class B	S100B+	623
70923.9	42639.8	6.58624	µm	Spot	Position	1	Class B	S100B+	624
70899.5	42647.5	6.79002	µm	Spot	Position	1	Class B	S100B+	625
70894.3	42648	7.16786	µm	Spot	Position	1	Class B	S100B+	627
70905.1	42659.1	6.99499	µm	Spot	Position	1	Class B	S100B+	628
70912.2	42673.6	7.10482	µm	Spot	Position	1	Class B	S100B+	629
70839.4	42679.8	6.86227	µm	Spot	Position	1	Class B	S100B+	630
70845.4	42689.5	6.63411	µm	Spot	Position	1	Class B	S100B+	631
70867.3	42678.6	7.04402	µm	Spot	Position	1	Class B	S100B+	632
70875.1	42682	7.20319	µm	Spot	Position	1	Class B	S100B+	633
70871.7	42687	6.94372	µm	Spot	Position	1	Class B	S100B+	635
70849.1	42690	7.16819	µm	Spot	Position	1	Class B	S100B+	636
70877.6	42715.2	7.08704	µm	Spot	Position	1	Class B	S100B+	637
70862.2	42719.9	6.9504	µm	Spot	Position	1	Class B	S100B+	638
70872.4	42731.1	6.46379	µm	Spot	Position	1	Class B	S100B+	644
69710.7	42294.3	7.2307	µm	Spot	Position	1	Class B	S100B+	648
69727.8	42331.3	7.29754	µm	Spot	Position	1	Class B	S100B+	650
69816.9	42315.4	8.34686	µm	Spot	Position	1	Class B	S100B+	651
69924.7	42318.4	7.31915	µm	Spot	Position	1	Class B	S100B+	653
70049.9	42380.3	7.68447	µm	Spot	Position	1	Class B	S100B+	657
70092.4	42413.7	7.47804	µm	Spot	Position	1	Class B	S100B+	658
71008.6	42461	7.87805	µm	Spot	Position	1	Class B	S100B+	667
71000.9	42481	8.04632	µm	Spot	Position	1	Class B	S100B+	668
70976.5	42516.3	7.96291	µm	Spot	Position	1	Class B	S100B+	671
70992.6	42507	7.24894	µm	Spot	Position	1	Class B	S100B+	673
70988	42514	7.50058	µm	Spot	Position	1	Class B	S100B+	674
70992.2	42500.8	7.93542	µm	Spot	Position	1	Class B	S100B+	675
70305.1	42568.7	7.2507	µm	Spot	Position	1	Class B	S100B+	676
70978.3	42544.2	7.48272	µm	Spot	Position	1	Class B	S100B+	679
70976.9	42548.7	7.65641	µm	Spot	Position	1	Class B	S100B+	681
70957.9	42559.5	7.6793	µm	Spot	Position	1	Class B	S100B+	682
70374.2	42604.2	7.39206	µm	Spot	Position	1	Class B	S100B+	685
70370.2	42597.9	8.02624	µm	Spot	Position	1	Class B	S100B+	686
70416.7	42622	7.42133	µm	Spot	Position	1	Class B	S100B+	687
70405.1	42612.8	7.67011	µm	Spot	Position	1	Class B	S100B+	688
70431.5	42614.5	7.33184	µm	Spot	Position	1	Class B	S100B+	691
70932	42611.3	7.67143	µm	Spot	Position	1	Class B	S100B+	700
70926.4	42625.8	8.34025	µm	Spot	Position	1	Class B	S100B+	704
70921.6	42630.3	8.23512	µm	Spot	Position	1	Class B	S100B+	705
70943	42606	7.24113	µm	Spot	Position	1	Class B	S100B+	706
70938.1	42604	7.86631	µm	Spot	Position	1	Class B	S100B+	708
70943.4	42612.5	7.95347	µm	Spot	Position	1	Class B	S100B+	709
70746.6	42647	7.60597	µm	Spot	Position	1	Class B	S100B+	713
70797.9	42655.8	7.38289	µm	Spot	Position	1	Class B	S100B+	717
70754.1	42652.2	7.68598	µm	Spot	Position	1	Class B	S100B+	718
70771.6	42656	7.89433	µm	Spot	Position	1	Class B	S100B+	720
70776.4	42651.2	8.20829	µm	Spot	Position	1	Class B	S100B+	724
70801	42654.5	7.37064	µm	Spot	Position	1	Class B	S100B+	725
70822.3	42656.7	8.16545	µm	Spot	Position	1	Class B	S100B+	726
70839.4	42662.7	8.1194	µm	Spot	Position	1	Class B	S100B+	727
70858.3	42663.1	7.24462	µm	Spot	Position	1	Class B	S100B+	728
70851.8	42665.6	7.37709	µm	Spot	Position	1	Class B	S100B+	729
70870.7	42659.9	7.61203	µm	Spot	Position	1	Class B	S100B+	731
70881.9	42660.6	7.7671	µm	Spot	Position	1	Class B	S100B+	732
70874.5	42662.3	7.64037	µm	Spot	Position	1	Class B	S100B+	733
70853.5	42669.1	8.16704	µm	Spot	Position	1	Class B	S100B+	737
70921.5	42653.5	7.41297	µm	Spot	Position	1	Class B	S100B+	738
70917.7	42648.9	8.07338	µm	Spot	Position	1	Class B	S100B+	739
70919.3	42651.6	7.90864	µm	Spot	Position	1	Class B	S100B+	740
70911.1	42676.2	7.91584	µm	Spot	Position	1	Class B	S100B+	741
70870.6	42689.5	7.38565	µm	Spot	Position	1	Class B	S100B+	742
70887.8	42690	7.42613	µm	Spot	Position	1	Class B	S100B+	743
70862.4	42723.2	7.44271	µm	Spot	Position	1	Class B	S100B+	744
70848.8	42684.1	7.74441	µm	Spot	Position	1	Class B	S100B+	746
70876.4	42718.3	7.77339	µm	Spot	Position	1	Class B	S100B+	748
70883.1	42682.8	8.00712	µm	Spot	Position	1	Class B	S100B+	749
70875.8	42716.7	8.07088	µm	Spot	Position	1	Class B	S100B+	751
70859.6	42721.9	8.15075	µm	Spot	Position	1	Class B	S100B+	754
70897	42694.7	7.67708	µm	Spot	Position	1	Class B	S100B+	755
70906.6	42685.8	7.99238	µm	Spot	Position	1	Class B	S100B+	756
70872.8	42729.4	8.36328	µm	Spot	Position	1	Class B	S100B+	758
70734.7	42649.9	8.72113	µm	Spot	Position	1	Class B	S100B+	759
70846.5	42663.3	8.49539	µm	Spot	Position	1	Class B	S100B+	761
70889.3	42698.9	8.58311	µm	Spot	Position	1	Class B	S100B+	765
69994.9	42360.3	10.5704	µm	Spot	Position	1	Class B	S100B+	769
69701.4	42325	0.1501	µm	Spot	Position	1	Class B	S100B-	4
69874.2	42326.2	1.08342	µm	Spot	Position	1	Class B	S100B-	7
69701.6	42325	1.45248	µm	Spot	Position	1	Class B	S100B-	26
69704.6	42310.3	1.53215	µm	Spot	Position	1	Class B	S100B-	27
71022	42364.6	1.62027	µm	Spot	Position	1	Class B	S100B-	48
69858.7	42317.6	2.73701	µm	Spot	Position	1	Class B	S100B-	65
69891.8	42319.1	2.73829	µm	Spot	Position	1	Class B	S100B-	67
69901.6	42320.2	3.5821	µm	Spot	Position	1	Class B	S100B-	70
71029.4	42367.4	3.0183	µm	Spot	Position	1	Class B	S100B-	79
70619.8	42637	2.75865	µm	Spot	Position	1	Class B	S100B-	100
71022.5	42406.7	3.88538	µm	Spot	Position	1	Class B	S100B-	159
71017.8	42440	3.97535	µm	Spot	Position	1	Class B	S100B-	162
70190.7	42492.7	4.49279	µm	Spot	Position	1	Class B	S100B-	171
70164.9	42477.5	4.60442	µm	Spot	Position	1	Class B	S100B-	174
70239.6	42530.4	3.8885	µm	Spot	Position	1	Class B	S100B-	177
70976	42538.7	4.64864	µm	Spot	Position	1	Class B	S100B-	183
70983.3	42504	4.53736	µm	Spot	Position	1	Class B	S100B-	184
70272.6	42547	4.27042	µm	Spot	Position	1	Class B	S100B-	190
70262.1	42543.3	4.74906	µm	Spot	Position	1	Class B	S100B-	192
70857.3	42674.7	4.25577	µm	Spot	Position	1	Class B	S100B-	236
70872.2	42670.6	4.70607	µm	Spot	Position	1	Class B	S100B-	237
70856.2	42678	4.04059	µm	Spot	Position	1	Class B	S100B-	240
70864.8	42724.7	4.78942	µm	Spot	Position	1	Class B	S100B-	244
71013.2	42460.5	5.27172	µm	Spot	Position	1	Class B	S100B-	317
70972	42519.4	5.32213	µm	Spot	Position	1	Class B	S100B-	329
70982.5	42494.4	5.62891	µm	Spot	Position	1	Class B	S100B-	331
70996	42504.1	5.17643	µm	Spot	Position	1	Class B	S100B-	345
70981.7	42543.4	4.92083	µm	Spot	Position	1	Class B	S100B-	352
70982.1	42544.5	4.91811	µm	Spot	Position	1	Class B	S100B-	353
70973.9	42546	5.52493	µm	Spot	Position	1	Class B	S100B-	358
70974.1	42561.3	5.57884	µm	Spot	Position	1	Class B	S100B-	361
70843.8	42667.4	5.46103	µm	Spot	Position	1	Class B	S100B-	434
70863.4	42673.6	5.89335	µm	Spot	Position	1	Class B	S100B-	437
70860.1	42676	5.83601	µm	Spot	Position	1	Class B	S100B-	438
70926.3	42637.9	5.85578	µm	Spot	Position	1	Class B	S100B-	440
70865.3	42678	5.56353	µm	Spot	Position	1	Class B	S100B-	444
70860.8	42679.1	5.45369	µm	Spot	Position	1	Class B	S100B-	445
70875.4	42722.3	5.94212	µm	Spot	Position	1	Class B	S100B-	449
69701.7	42299.3	7.12699	µm	Spot	Position	1	Class B	S100B-	460
69678.9	42315.8	6.71306	µm	Spot	Position	1	Class B	S100B-	474
69793.1	42308.8	6.14699	µm	Spot	Position	1	Class B	S100B-	476
69881.2	42318.3	6.51081	µm	Spot	Position	1	Class B	S100B-	479
69876.7	42319.9	6.33037	µm	Spot	Position	1	Class B	S100B-	480
71025.1	42351.5	7.01516	µm	Spot	Position	1	Class B	S100B-	486
71012.5	42367.7	6.59636	µm	Spot	Position	1	Class B	S100B-	496
71023.7	42410.6	6.13098	µm	Spot	Position	1	Class B	S100B-	503
71014.7	42436.6	6.18385	µm	Spot	Position	1	Class B	S100B-	505
70139.4	42473.4	6.21651	µm	Spot	Position	1	Class B	S100B-	517
70201	42498	6.5461	µm	Spot	Position	1	Class B	S100B-	534
70975.6	42517.5	6.66731	µm	Spot	Position	1	Class B	S100B-	539
70983.3	42495.9	7.01959	µm	Spot	Position	1	Class B	S100B-	545
70985.9	42506.8	6.97458	µm	Spot	Position	1	Class B	S100B-	546
70981.4	42542.1	6.79996	µm	Spot	Position	1	Class B	S100B-	563
70869	42682.5	6.94602	µm	Spot	Position	1	Class B	S100B-	634
70867.8	42729.9	6.27968	µm	Spot	Position	1	Class B	S100B-	639
70870.7	42731	6.11629	µm	Spot	Position	1	Class B	S100B-	640
70870.2	42732.1	6.28833	µm	Spot	Position	1	Class B	S100B-	641
70873	42726.5	6.36008	µm	Spot	Position	1	Class B	S100B-	642
70869.7	42728.5	6.38282	µm	Spot	Position	1	Class B	S100B-	643
70871.6	42732.4	6.38812	µm	Spot	Position	1	Class B	S100B-	645
70869.4	42733.6	6.7945	µm	Spot	Position	1	Class B	S100B-	646
70871.8	42732.8	7.13718	µm	Spot	Position	1	Class B	S100B-	647
69814.7	42306	7.29727	µm	Spot	Position	1	Class B	S100B-	649
69978.7	42334.1	7.43261	µm	Spot	Position	1	Class B	S100B-	656
70985.5	42505.5	7.40349	µm	Spot	Position	1	Class B	S100B-	672
70974.6	42542.8	7.33339	µm	Spot	Position	1	Class B	S100B-	677
70968	42544	7.29653	µm	Spot	Position	1	Class B	S100B-	678
70418.4	42616.5	8.33071	µm	Spot	Position	1	Class B	S100B-	690
70925.8	42613.7	8.32435	µm	Spot	Position	1	Class B	S100B-	703
70862.2	42672.6	7.85018	µm	Spot	Position	1	Class B	S100B-	735
70860	42674.5	8.0825	µm	Spot	Position	1	Class B	S100B-	736
70862.1	42678.8	7.56944	µm	Spot	Position	1	Class B	S100B-	745
70871.6	42716	7.5801	µm	Spot	Position	1	Class B	S100B-	747
70869	42716.2	7.90318	µm	Spot	Position	1	Class B	S100B-	750
70866.1	42719.8	7.85263	µm	Spot	Position	1	Class B	S100B-	752
70868	42718.4	8.40042	µm	Spot	Position	1	Class B	S100B-	753
70869.4	42729	8.28454	µm	Spot	Position	1	Class B	S100B-	757
70860.1	42676.9	8.55742	µm	Spot	Position	1	Class B	S100B-	762
70873.3	42686.5	8.45386	µm	Spot	Position	1	Class B	S100B-	764
70879.1	42710.3	8.52404	µm	Spot	Position	1	Class B	S100B-	766
70867.9	42720.1	8.4743	µm	Spot	Position	1	Class B	S100B-	767

## Sheet: Sample 2-Dio2+S100b-Position - 
AC338 Dio2 555S100b 488_R_[ii22_TileScan_1_Merged_Image_23]_Position
Position
====================
Position X	Position Y	Position Z	Unit	Category	Collection	Time	S100B	dapi	ID
66171.1	44471.9	5.51953	µm	Spot	Position	1		Class A	13
66174.4	44585.7	6.81468	µm	Spot	Position	1		Class A	35
66161.2	44714.7	6.72397	µm	Spot	Position	1		Class A	42
66157.9	44634.9	8.37649	µm	Spot	Position	1		Class A	71
66123.8	45074.6	8.38549	µm	Spot	Position	1		Class A	92
66120.7	45111.2	7.80699	µm	Spot	Position	1		Class A	94
66090.6	45245.4	7.70774	µm	Spot	Position	1		Class A	98
66156.3	44833.6	8.86918	µm	Spot	Position	1		Class A	127
66122.7	45098	8.65997	µm	Spot	Position	1		Class A	152
66094.8	45229.2	9.42835	µm	Spot	Position	1		Class A	161
66125.4	45999.6	10.1876	µm	Spot	Position	1		Class A	256
66506.5	46119.5	10.6138	µm	Spot	Position	1		Class A	287
66036.3	45682.4	10.961	µm	Spot	Position	1		Class A	313
66014.1	45875.8	10.8967	µm	Spot	Position	1		Class A	321
66138.5	46005.7	11.5058	µm	Spot	Position	1		Class A	361
66456.9	46139	11.5472	µm	Spot	Position	1		Class A	405
66362.8	46151.8	11.4604	µm	Spot	Position	1		Class A	411
66437.1	46141.8	11.0845	µm	Spot	Position	1		Class A	412
66029.3	45866.9	12.4666	µm	Spot	Position	1		Class A	438
66185.2	46026.6	12.4044	µm	Spot	Position	1		Class A	468
66194.4	46062.9	12.9053	µm	Spot	Position	1		Class A	471
66232.7	46094.8	12.3965	µm	Spot	Position	1		Class A	482
66370.7	46143	12.2523	µm	Spot	Position	1		Class A	530
66305.6	46125.7	13.943	µm	Spot	Position	1		Class A	584
66303.1	46104.4	14.2936	µm	Spot	Position	1		Class A	585
66186.5	46028.2	14.8347	µm	Spot	Position	1		Class A	620
66187.5	44497.8	2.51159	µm	Spot	Position	1	S100B+	Class B	1
66183.6	44504.5	2.98415	µm	Spot	Position	1	S100B+	Class B	2
66172	44611.8	5.90236	µm	Spot	Position	1	S100B+	Class B	20
66168.3	44619.3	5.90493	µm	Spot	Position	1	S100B+	Class B	22
66128.3	44988.5	5.42689	µm	Spot	Position	1	S100B+	Class B	25
66174.1	44474.5	6.0731	µm	Spot	Position	1	S100B+	Class B	29
66132.9	44958	6.48849	µm	Spot	Position	1	S100B+	Class B	46
66130.6	44970.8	6.66159	µm	Spot	Position	1	S100B+	Class B	47
66109.8	45104.6	6.2824	µm	Spot	Position	1	S100B+	Class B	53
66113.3	45080.4	6.52947	µm	Spot	Position	1	S100B+	Class B	54
66164.9	44635.8	8.14532	µm	Spot	Position	1	S100B+	Class B	72
66161.1	44656.2	8.30798	µm	Spot	Position	1	S100B+	Class B	73
66155.8	44785.7	7.57339	µm	Spot	Position	1	S100B+	Class B	78
66153.8	44771.4	8.00903	µm	Spot	Position	1	S100B+	Class B	79
66163.2	44636.2	9.0482	µm	Spot	Position	1	S100B+	Class B	108
66147.7	44702.9	8.70826	µm	Spot	Position	1	S100B+	Class B	115
66151.9	44705	9.22564	µm	Spot	Position	1	S100B+	Class B	118
66127.5	44982.4	8.59989	µm	Spot	Position	1	S100B+	Class B	135
66133.9	44948.6	9.25307	µm	Spot	Position	1	S100B+	Class B	137
66132.5	44959.1	9.25356	µm	Spot	Position	1	S100B+	Class B	138
66113.5	45060.5	8.51423	µm	Spot	Position	1	S100B+	Class B	145
66118.1	45096.1	9.47008	µm	Spot	Position	1	S100B+	Class B	154
66100.2	45190.7	9.09455	µm	Spot	Position	1	S100B+	Class B	156
66017.4	45799.7	9.19389	µm	Spot	Position	1	S100B+	Class B	174
66007.7	45855.8	9.52062	µm	Spot	Position	1	S100B+	Class B	175
66129.5	46004.9	9.41297	µm	Spot	Position	1	S100B+	Class B	192
66103.6	45177.5	10.3491	µm	Spot	Position	1	S100B+	Class B	214
66080.1	45288.8	10.7329	µm	Spot	Position	1	S100B+	Class B	217
66032.1	45697.5	10.0615	µm	Spot	Position	1	S100B+	Class B	234
66054.4	45922.8	9.85402	µm	Spot	Position	1	S100B+	Class B	243
66053.8	45935	10.2492	µm	Spot	Position	1	S100B+	Class B	246
66072.9	45975.3	10.0997	µm	Spot	Position	1	S100B+	Class B	249
66080.3	45961.3	10.1353	µm	Spot	Position	1	S100B+	Class B	253
66081.1	45976.3	10.1136	µm	Spot	Position	1	S100B+	Class B	255
66082.7	45984.8	10.7166	µm	Spot	Position	1	S100B+	Class B	258
66257	46105.3	10.2031	µm	Spot	Position	1	S100B+	Class B	265
66282.3	46108	10.422	µm	Spot	Position	1	S100B+	Class B	267
66103.8	45159.5	11.8101	µm	Spot	Position	1	S100B+	Class B	291
66037.8	45655.8	10.9565	µm	Spot	Position	1	S100B+	Class B	308
66032.7	45878.1	10.9205	µm	Spot	Position	1	S100B+	Class B	322
66025.8	45884.3	10.9407	µm	Spot	Position	1	S100B+	Class B	323
66028.1	45890	11.0305	µm	Spot	Position	1	S100B+	Class B	324
66014.5	45888.9	11.5923	µm	Spot	Position	1	S100B+	Class B	328
66038.6	45920.3	10.8955	µm	Spot	Position	1	S100B+	Class B	330
66050.6	45921.9	11.1006	µm	Spot	Position	1	S100B+	Class B	331
66065.3	45942.1	10.8086	µm	Spot	Position	1	S100B+	Class B	332
66050.4	45935.3	11.8673	µm	Spot	Position	1	S100B+	Class B	337
66075.1	45977.9	10.8988	µm	Spot	Position	1	S100B+	Class B	340
66076.5	45971.1	11.2172	µm	Spot	Position	1	S100B+	Class B	341
66073.5	45980.1	11.2533	µm	Spot	Position	1	S100B+	Class B	342
66076.2	45980.4	11.3551	µm	Spot	Position	1	S100B+	Class B	343
66132.1	46005	11.1595	µm	Spot	Position	1	S100B+	Class B	359
66127.5	46001.8	11.601	µm	Spot	Position	1	S100B+	Class B	360
66293	46103.3	11.1888	µm	Spot	Position	1	S100B+	Class B	382
66444.6	46119.1	11.802	µm	Spot	Position	1	S100B+	Class B	401
66501.8	46121.7	10.9137	µm	Spot	Position	1	S100B+	Class B	407
66503.6	46123.9	11.3189	µm	Spot	Position	1	S100B+	Class B	408
66019.8	45786.2	12.411	µm	Spot	Position	1	S100B+	Class B	434
66020	45850.1	12.0899	µm	Spot	Position	1	S100B+	Class B	437
66078.6	45980.8	12.4916	µm	Spot	Position	1	S100B+	Class B	445
66170.9	46040.3	12.5729	µm	Spot	Position	1	S100B+	Class B	462
66169.1	46037.1	12.9033	µm	Spot	Position	1	S100B+	Class B	463
66175.2	46045.1	12.0959	µm	Spot	Position	1	S100B+	Class B	467
66177	46024.9	12.816	µm	Spot	Position	1	S100B+	Class B	469
66253.1	46102.2	12.3559	µm	Spot	Position	1	S100B+	Class B	484
66265.5	46106.9	12.0477	µm	Spot	Position	1	S100B+	Class B	487
66283.4	46095.2	13.069	µm	Spot	Position	1	S100B+	Class B	490
66292.6	46100	13.0598	µm	Spot	Position	1	S100B+	Class B	493
66265.2	46110.3	12.9274	µm	Spot	Position	1	S100B+	Class B	494
66276.7	46115.5	13.1258	µm	Spot	Position	1	S100B+	Class B	495
66314.1	46098.6	13.1808	µm	Spot	Position	1	S100B+	Class B	502
66319.4	46125.7	13.0595	µm	Spot	Position	1	S100B+	Class B	503
66425.1	46126	12.8902	µm	Spot	Position	1	S100B+	Class B	513
66494.9	46122.1	12.6049	µm	Spot	Position	1	S100B+	Class B	522
66343.6	46144.3	12.5931	µm	Spot	Position	1	S100B+	Class B	525
66390.3	46141.7	12.7266	µm	Spot	Position	1	S100B+	Class B	531
66357.1	46146.1	13.0576	µm	Spot	Position	1	S100B+	Class B	532
66425.4	46145.7	12.8794	µm	Spot	Position	1	S100B+	Class B	534
66450.4	46145	12.3291	µm	Spot	Position	1	S100B+	Class B	538
66040.7	45569.6	13.3651	µm	Spot	Position	1	S100B+	Class B	546
66040.6	45564.5	14.2663	µm	Spot	Position	1	S100B+	Class B	547
66181	46045.2	13.2282	µm	Spot	Position	1	S100B+	Class B	552
66185.8	46031.3	14.044	µm	Spot	Position	1	S100B+	Class B	556
66211.5	46063	14.0168	µm	Spot	Position	1	S100B+	Class B	560
66290.2	46099.3	13.2773	µm	Spot	Position	1	S100B+	Class B	578
66312.6	46095.8	13.8546	µm	Spot	Position	1	S100B+	Class B	590
66496.1	46117.1	13.2442	µm	Spot	Position	1	S100B+	Class B	610
66266.5	46111.4	14.6975	µm	Spot	Position	1	S100B+	Class B	630
66506.2	46125.2	14.5422	µm	Spot	Position	1	S100B+	Class B	638
66190	44430.5	4.77246	µm	Spot	Position	1	S100B-	Class B	3
66189.6	44431.6	3.73398	µm	Spot	Position	1	S100B-	Class B	4
66176.4	44462	4.07459	µm	Spot	Position	1	S100B-	Class B	5
66178.6	44444.3	4.69616	µm	Spot	Position	1	S100B-	Class B	6
66176.5	44607.1	3.77233	µm	Spot	Position	1	S100B-	Class B	7
66114.7	45091.3	4.01396	µm	Spot	Position	1	S100B-	Class B	8
66183.4	44415.6	4.8755	µm	Spot	Position	1	S100B-	Class B	10
66187	44418	5.3397	µm	Spot	Position	1	S100B-	Class B	12
66194.1	44451.7	5.22739	µm	Spot	Position	1	S100B-	Class B	14
66176.3	44461.5	5.29456	µm	Spot	Position	1	S100B-	Class B	15
66182.8	44446.3	5.99303	µm	Spot	Position	1	S100B-	Class B	16
66184.4	44520.6	5.15553	µm	Spot	Position	1	S100B-	Class B	17
66194	44511.3	5.75537	µm	Spot	Position	1	S100B-	Class B	19
66170.6	44622.1	4.99419	µm	Spot	Position	1	S100B-	Class B	21
66135.9	44947.3	5.46569	µm	Spot	Position	1	S100B-	Class B	24
66120.4	45095.3	5.67736	µm	Spot	Position	1	S100B-	Class B	26
66119.5	45091.1	5.73825	µm	Spot	Position	1	S100B-	Class B	27
66186.4	44453.7	6.48102	µm	Spot	Position	1	S100B-	Class B	30
66190.5	44466.7	6.53885	µm	Spot	Position	1	S100B-	Class B	31
66184.2	44434.7	6.97468	µm	Spot	Position	1	S100B-	Class B	32
66196	44503.2	6.69808	µm	Spot	Position	1	S100B-	Class B	33
66193.7	44521	6.62498	µm	Spot	Position	1	S100B-	Class B	34
66171.7	44616	6.04006	µm	Spot	Position	1	S100B-	Class B	36
66163.6	44655.6	6.61376	µm	Spot	Position	1	S100B-	Class B	37
66163.3	44669.5	6.15782	µm	Spot	Position	1	S100B-	Class B	38
66156.7	44697.5	6.16682	µm	Spot	Position	1	S100B-	Class B	39
66162.6	44703.7	6.24669	µm	Spot	Position	1	S100B-	Class B	40
66139.1	44953.6	7.12665	µm	Spot	Position	1	S100B-	Class B	48
66132.5	44984.8	6.6181	µm	Spot	Position	1	S100B-	Class B	51
66112.1	45096.2	6.07868	µm	Spot	Position	1	S100B-	Class B	52
66183.7	44415.6	7.41063	µm	Spot	Position	1	S100B-	Class B	55
66183.7	44422.3	7.36408	µm	Spot	Position	1	S100B-	Class B	56
66194.9	44441	7.34049	µm	Spot	Position	1	S100B-	Class B	60
66185.9	44474.5	7.72194	µm	Spot	Position	1	S100B-	Class B	61
66185.3	44476.2	7.79054	µm	Spot	Position	1	S100B-	Class B	62
66178.8	44469.1	7.93131	µm	Spot	Position	1	S100B-	Class B	63
66193.2	44476.6	8.00442	µm	Spot	Position	1	S100B-	Class B	64
66173.3	44601.1	7.30918	µm	Spot	Position	1	S100B-	Class B	65
66177.6	44570.6	7.79024	µm	Spot	Position	1	S100B-	Class B	66
66174.1	44614.3	8.32589	µm	Spot	Position	1	S100B-	Class B	68
66163.5	44641.1	7.51417	µm	Spot	Position	1	S100B-	Class B	69
66169.6	44624.3	8.18384	µm	Spot	Position	1	S100B-	Class B	70
66175.3	44616.3	8.3428	µm	Spot	Position	1	S100B-	Class B	74
66166.4	44667.4	7.5155	µm	Spot	Position	1	S100B-	Class B	75
66169.2	44668	7.69095	µm	Spot	Position	1	S100B-	Class B	76
66155.7	44800.2	7.39287	µm	Spot	Position	1	S100B-	Class B	81
66155.5	44831.3	7.64515	µm	Spot	Position	1	S100B-	Class B	82
66149.7	44853.1	7.27056	µm	Spot	Position	1	S100B-	Class B	83
66149	44859.4	7.9963	µm	Spot	Position	1	S100B-	Class B	84
66137.6	44946.2	7.48039	µm	Spot	Position	1	S100B-	Class B	85
66131.8	44974	8.0678	µm	Spot	Position	1	S100B-	Class B	86
66132.7	44976	8.39025	µm	Spot	Position	1	S100B-	Class B	87
66130.5	44985.5	8.28604	µm	Spot	Position	1	S100B-	Class B	90
66125.1	45049	7.43853	µm	Spot	Position	1	S100B-	Class B	91
66119.1	45101.1	8.05316	µm	Spot	Position	1	S100B-	Class B	93
66099.3	45198	7.75459	µm	Spot	Position	1	S100B-	Class B	95
66104	45201.4	7.78274	µm	Spot	Position	1	S100B-	Class B	96
66105	45180.9	8.34595	µm	Spot	Position	1	S100B-	Class B	97
66076.7	45317.8	7.63022	µm	Spot	Position	1	S100B-	Class B	99
66165.9	44614.4	8.85523	µm	Spot	Position	1	S100B-	Class B	101
66174.1	44609.6	8.68385	µm	Spot	Position	1	S100B-	Class B	102
66175.5	44570.3	8.72847	µm	Spot	Position	1	S100B-	Class B	103
66175.9	44604.3	9.31606	µm	Spot	Position	1	S100B-	Class B	104
66161.3	44634.9	8.46917	µm	Spot	Position	1	S100B-	Class B	106
66161.5	44657.7	8.75283	µm	Spot	Position	1	S100B-	Class B	107
66165.4	44641.1	9.57017	µm	Spot	Position	1	S100B-	Class B	110
66153.1	44707.1	8.68963	µm	Spot	Position	1	S100B-	Class B	113
66162.4	44700.4	9.12988	µm	Spot	Position	1	S100B-	Class B	117
66155.2	44694.7	9.41061	µm	Spot	Position	1	S100B-	Class B	119
66160.8	44760.1	8.52031	µm	Spot	Position	1	S100B-	Class B	120
66163	44785	8.6052	µm	Spot	Position	1	S100B-	Class B	121
66159.1	44791.6	8.60299	µm	Spot	Position	1	S100B-	Class B	122
66154.9	44764.8	8.96396	µm	Spot	Position	1	S100B-	Class B	124
66159.9	44778.5	9.11259	µm	Spot	Position	1	S100B-	Class B	125
66156.8	44796.1	9.00718	µm	Spot	Position	1	S100B-	Class B	126
66157	44809.5	9.47638	µm	Spot	Position	1	S100B-	Class B	128
66151.4	44854.2	8.82508	µm	Spot	Position	1	S100B-	Class B	129
66151.1	44856.3	9.20154	µm	Spot	Position	1	S100B-	Class B	130
66143.2	44888.9	9.53046	µm	Spot	Position	1	S100B-	Class B	131
66128.8	44977.5	8.48641	µm	Spot	Position	1	S100B-	Class B	134
66127.4	44984.1	8.55403	µm	Spot	Position	1	S100B-	Class B	136
66132	44985.1	9.57494	µm	Spot	Position	1	S100B-	Class B	142
66119.4	45036.7	8.79633	µm	Spot	Position	1	S100B-	Class B	146
66120.5	45038.3	9.14814	µm	Spot	Position	1	S100B-	Class B	147
66120.3	45066.3	9.31881	µm	Spot	Position	1	S100B-	Class B	148
66129	45031.6	8.7557	µm	Spot	Position	1	S100B-	Class B	150
66115.3	45104.9	9.16565	µm	Spot	Position	1	S100B-	Class B	153
66101.1	45210.5	9.21181	µm	Spot	Position	1	S100B-	Class B	157
66098.8	45213.8	9.59512	µm	Spot	Position	1	S100B-	Class B	158
66033	45718.7	9.00001	µm	Spot	Position	1	S100B-	Class B	173
66026.9	45877	8.52354	µm	Spot	Position	1	S100B-	Class B	176
66020.9	45876.8	9.40813	µm	Spot	Position	1	S100B-	Class B	177
66031	45876.9	9.41436	µm	Spot	Position	1	S100B-	Class B	178
66051.8	45937.6	9.00565	µm	Spot	Position	1	S100B-	Class B	179
66050.1	45911.2	9.28095	µm	Spot	Position	1	S100B-	Class B	180
66059.1	45938.6	9.28373	µm	Spot	Position	1	S100B-	Class B	181
66076.5	45948.9	9.48208	µm	Spot	Position	1	S100B-	Class B	182
66099.1	45967.6	8.59685	µm	Spot	Position	1	S100B-	Class B	183
66090.6	45957.8	8.75468	µm	Spot	Position	1	S100B-	Class B	184
66103.8	45970.9	9.12903	µm	Spot	Position	1	S100B-	Class B	186
66099.2	45972.8	9.23123	µm	Spot	Position	1	S100B-	Class B	187
66100.9	45994	9.22193	µm	Spot	Position	1	S100B-	Class B	188
66087.5	45955.6	9.50337	µm	Spot	Position	1	S100B-	Class B	189
66100.9	45964.8	9.5379	µm	Spot	Position	1	S100B-	Class B	190
66091.4	45992.7	9.60316	µm	Spot	Position	1	S100B-	Class B	191
66253.1	46093.8	9.36693	µm	Spot	Position	1	S100B-	Class B	193
66395.1	46137.8	9.28691	µm	Spot	Position	1	S100B-	Class B	194
66429.4	46138.1	8.60486	µm	Spot	Position	1	S100B-	Class B	195
66425.4	46145.3	9.49351	µm	Spot	Position	1	S100B-	Class B	196
66164.5	44617.8	9.96027	µm	Spot	Position	1	S100B-	Class B	197
66164.6	44640.3	9.97838	µm	Spot	Position	1	S100B-	Class B	198
66162.5	44666.6	10.0129	µm	Spot	Position	1	S100B-	Class B	199
66161	44772.1	9.77869	µm	Spot	Position	1	S100B-	Class B	201
66143.7	44892.1	10.1012	µm	Spot	Position	1	S100B-	Class B	202
66142.2	44900.9	10.3762	µm	Spot	Position	1	S100B-	Class B	204
66142.6	44903.8	10.4693	µm	Spot	Position	1	S100B-	Class B	205
66134.8	44978.2	9.9043	µm	Spot	Position	1	S100B-	Class B	208
66129.5	45027	9.80237	µm	Spot	Position	1	S100B-	Class B	209
66103.3	45187.7	9.75939	µm	Spot	Position	1	S100B-	Class B	213
66091.1	45243.6	10.1435	µm	Spot	Position	1	S100B-	Class B	216
66075.7	45325.1	10.2403	µm	Spot	Position	1	S100B-	Class B	218
66037.7	45666.1	10.6914	µm	Spot	Position	1	S100B-	Class B	233
66032.6	45707	10.2787	µm	Spot	Position	1	S100B-	Class B	235
66035.1	45678.3	10.756	µm	Spot	Position	1	S100B-	Class B	236
66021.2	45795.1	10.3172	µm	Spot	Position	1	S100B-	Class B	239
66021.6	45835.5	9.96867	µm	Spot	Position	1	S100B-	Class B	240
66040.1	45905.5	10.118	µm	Spot	Position	1	S100B-	Class B	241
66062.9	45932	9.94277	µm	Spot	Position	1	S100B-	Class B	244
66046.8	45930.3	10.3818	µm	Spot	Position	1	S100B-	Class B	245
66071.7	45951.4	10.4805	µm	Spot	Position	1	S100B-	Class B	248
66092.8	45974.3	9.65593	µm	Spot	Position	1	S100B-	Class B	251
66095.6	45992.9	9.90269	µm	Spot	Position	1	S100B-	Class B	252
66086.8	45974.8	10.1344	µm	Spot	Position	1	S100B-	Class B	254
66086.1	45964.5	10.22	µm	Spot	Position	1	S100B-	Class B	257
66114.4	46003.6	10.3483	µm	Spot	Position	1	S100B-	Class B	259
66127.6	46007.1	10.2625	µm	Spot	Position	1	S100B-	Class B	260
66182.9	46028.3	10.5843	µm	Spot	Position	1	S100B-	Class B	261
66186.7	46032.4	10.6475	µm	Spot	Position	1	S100B-	Class B	262
66257.2	46099.9	9.89502	µm	Spot	Position	1	S100B-	Class B	263
66250.6	46100	9.61802	µm	Spot	Position	1	S100B-	Class B	264
66256.3	46103.6	10.7464	µm	Spot	Position	1	S100B-	Class B	266
66318.3	46124.9	10.2989	µm	Spot	Position	1	S100B-	Class B	268
66346.5	46138	10.4286	µm	Spot	Position	1	S100B-	Class B	269
66337.9	46138.9	10.4415	µm	Spot	Position	1	S100B-	Class B	270
66345.1	46117.6	10.7638	µm	Spot	Position	1	S100B-	Class B	271
66344.8	46121.9	10.6852	µm	Spot	Position	1	S100B-	Class B	272
66368.9	46130.4	9.61156	µm	Spot	Position	1	S100B-	Class B	273
66370.8	46132.9	9.79364	µm	Spot	Position	1	S100B-	Class B	274
66365.6	46130.9	10.5665	µm	Spot	Position	1	S100B-	Class B	275
66435.8	46132.6	10.4738	µm	Spot	Position	1	S100B-	Class B	276
66420.9	46132.9	10.4286	µm	Spot	Position	1	S100B-	Class B	277
66426.7	46135.6	10.4843	µm	Spot	Position	1	S100B-	Class B	278
66422.5	46131.4	10.7821	µm	Spot	Position	1	S100B-	Class B	279
66461.7	46122.3	10.3674	µm	Spot	Position	1	S100B-	Class B	280
66452.2	46122.8	10.7097	µm	Spot	Position	1	S100B-	Class B	282
66505.3	46118.1	9.97934	µm	Spot	Position	1	S100B-	Class B	283
66501.4	46129.4	10.0087	µm	Spot	Position	1	S100B-	Class B	284
66502	46126.4	10.329	µm	Spot	Position	1	S100B-	Class B	285
66500.6	46135	10.2824	µm	Spot	Position	1	S100B-	Class B	286
66500.6	46125.7	10.6308	µm	Spot	Position	1	S100B-	Class B	288
66346.7	46143.2	10.1161	µm	Spot	Position	1	S100B-	Class B	289
66407.8	46141.9	10.2953	µm	Spot	Position	1	S100B-	Class B	290
66101.7	45193.5	11.0372	µm	Spot	Position	1	S100B-	Class B	292
66103.7	45199.2	11.1446	µm	Spot	Position	1	S100B-	Class B	293
66102.9	45195.9	11.5669	µm	Spot	Position	1	S100B-	Class B	294
66071.4	45328.2	11.3524	µm	Spot	Position	1	S100B-	Class B	295
66076.5	45310.8	11.855	µm	Spot	Position	1	S100B-	Class B	297
66033.4	45601.9	11.0491	µm	Spot	Position	1	S100B-	Class B	305
66034	45620	10.861	µm	Spot	Position	1	S100B-	Class B	306
66036.2	45623.1	11.0562	µm	Spot	Position	1	S100B-	Class B	307
66039.5	45638.1	11.4732	µm	Spot	Position	1	S100B-	Class B	309
66041.3	45638.1	11.5023	µm	Spot	Position	1	S100B-	Class B	310
66039.2	45676.6	11.6783	µm	Spot	Position	1	S100B-	Class B	311
66031.2	45704.4	11.299	µm	Spot	Position	1	S100B-	Class B	312
66018.8	45851.6	11.3598	µm	Spot	Position	1	S100B-	Class B	315
66016.9	45828	11.5665	µm	Spot	Position	1	S100B-	Class B	316
66015.8	45835.2	11.8495	µm	Spot	Position	1	S100B-	Class B	317
66015.6	45840.4	11.7524	µm	Spot	Position	1	S100B-	Class B	318
66022.5	45851	11.7436	µm	Spot	Position	1	S100B-	Class B	319
66027	45870.1	11.2997	µm	Spot	Position	1	S100B-	Class B	325
66028.5	45869.5	11.6622	µm	Spot	Position	1	S100B-	Class B	326
66022.5	45874.6	11.5971	µm	Spot	Position	1	S100B-	Class B	327
66032.3	45890	11.8883	µm	Spot	Position	1	S100B-	Class B	329
66042.2	45924.5	11.6595	µm	Spot	Position	1	S100B-	Class B	333
66060.8	45933.3	11.4636	µm	Spot	Position	1	S100B-	Class B	334
66052.9	45930.3	11.7963	µm	Spot	Position	1	S100B-	Class B	335
66055.6	45934.8	11.757	µm	Spot	Position	1	S100B-	Class B	336
66081.9	45953.5	11.6101	µm	Spot	Position	1	S100B-	Class B	339
66078.4	45955	11.7616	µm	Spot	Position	1	S100B-	Class B	344
66078.3	45958.2	11.8309	µm	Spot	Position	1	S100B-	Class B	345
66076.8	45968.6	11.9796	µm	Spot	Position	1	S100B-	Class B	346
66104.4	45972	10.8967	µm	Spot	Position	1	S100B-	Class B	347
66121.3	45996.4	10.8429	µm	Spot	Position	1	S100B-	Class B	348
66092.7	45961.9	11.2114	µm	Spot	Position	1	S100B-	Class B	349
66113.8	45996.1	11.1348	µm	Spot	Position	1	S100B-	Class B	352
66098.7	45993.9	11.6826	µm	Spot	Position	1	S100B-	Class B	354
66093.7	45973.8	11.9689	µm	Spot	Position	1	S100B-	Class B	355
66122.4	45999.1	11.8718	µm	Spot	Position	1	S100B-	Class B	356
66136.2	45998.7	10.8388	µm	Spot	Position	1	S100B-	Class B	357
66148.9	46025.4	10.9631	µm	Spot	Position	1	S100B-	Class B	358
66133.1	46003.5	11.8917	µm	Spot	Position	1	S100B-	Class B	362
66153.8	46024.7	11.7232	µm	Spot	Position	1	S100B-	Class B	364
66191.4	46038.6	10.8959	µm	Spot	Position	1	S100B-	Class B	365
66189	46032.9	11.3046	µm	Spot	Position	1	S100B-	Class B	366
66189	46030.1	11.516	µm	Spot	Position	1	S100B-	Class B	367
66189.9	46039.9	11.4618	µm	Spot	Position	1	S100B-	Class B	368
66186.6	46040.8	11.4583	µm	Spot	Position	1	S100B-	Class B	369
66180.1	46046.3	11.9867	µm	Spot	Position	1	S100B-	Class B	370
66211.8	46060.6	11.8923	µm	Spot	Position	1	S100B-	Class B	372
66211.4	46073.4	11.7442	µm	Spot	Position	1	S100B-	Class B	373
66245.9	46085.8	11.7184	µm	Spot	Position	1	S100B-	Class B	376
66244	46096.4	11.7867	µm	Spot	Position	1	S100B-	Class B	379
66269.5	46109.2	10.96	µm	Spot	Position	1	S100B-	Class B	380
66295	46121.9	11.2385	µm	Spot	Position	1	S100B-	Class B	383
66300.1	46096.8	11.6329	µm	Spot	Position	1	S100B-	Class B	384
66268.9	46105.9	11.5386	µm	Spot	Position	1	S100B-	Class B	385
66301.5	46095.7	11.87	µm	Spot	Position	1	S100B-	Class B	386
66334.8	46117.9	11.0779	µm	Spot	Position	1	S100B-	Class B	388
66343.3	46120.4	11.4409	µm	Spot	Position	1	S100B-	Class B	389
66331.6	46124	11.6858	µm	Spot	Position	1	S100B-	Class B	390
66356.3	46125.9	11.9557	µm	Spot	Position	1	S100B-	Class B	391
66377.8	46138.1	10.818	µm	Spot	Position	1	S100B-	Class B	392
66370.2	46123.3	11.3267	µm	Spot	Position	1	S100B-	Class B	393
66402.1	46129.2	11.2177	µm	Spot	Position	1	S100B-	Class B	394
66398.4	46131.1	11.3494	µm	Spot	Position	1	S100B-	Class B	395
66396.9	46135.5	11.7076	µm	Spot	Position	1	S100B-	Class B	396
66409.7	46133.6	10.8076	µm	Spot	Position	1	S100B-	Class B	398
66410.2	46128.6	11.6516	µm	Spot	Position	1	S100B-	Class B	400
66459.3	46130	11.3398	µm	Spot	Position	1	S100B-	Class B	402
66477.7	46120.8	11.5169	µm	Spot	Position	1	S100B-	Class B	403
66471.7	46138.9	11.6042	µm	Spot	Position	1	S100B-	Class B	404
66442.6	46144.1	11.0224	µm	Spot	Position	1	S100B-	Class B	413
66451.5	46139.2	11.698	µm	Spot	Position	1	S100B-	Class B	414
66455	46151.7	11.4919	µm	Spot	Position	1	S100B-	Class B	415
66453	46156.9	11.8846	µm	Spot	Position	1	S100B-	Class B	416
66496.5	46139.2	10.9215	µm	Spot	Position	1	S100B-	Class B	417
66497.4	46147.1	11.2034	µm	Spot	Position	1	S100B-	Class B	418
66102.1	45186.3	12.1888	µm	Spot	Position	1	S100B-	Class B	419
66074.6	45316.6	13.1269	µm	Spot	Position	1	S100B-	Class B	420
66032.5	45709.4	12.7191	µm	Spot	Position	1	S100B-	Class B	424
66029.8	45712.6	12.6993	µm	Spot	Position	1	S100B-	Class B	425
66033	45715.4	12.9304	µm	Spot	Position	1	S100B-	Class B	426
66034	45721.5	12.3655	µm	Spot	Position	1	S100B-	Class B	427
66022.8	45751	12.8401	µm	Spot	Position	1	S100B-	Class B	428
66029.8	45727.4	13.0566	µm	Spot	Position	1	S100B-	Class B	429
66025.8	45751.3	13.1609	µm	Spot	Position	1	S100B-	Class B	431
66023.6	45753.4	13.0979	µm	Spot	Position	1	S100B-	Class B	432
66017.2	45770.1	12.1462	µm	Spot	Position	1	S100B-	Class B	433
66019.5	45834.8	12.0137	µm	Spot	Position	1	S100B-	Class B	435
66022.1	45843.6	12.1295	µm	Spot	Position	1	S100B-	Class B	436
66022.7	45877.7	12.7573	µm	Spot	Position	1	S100B-	Class B	439
66025	45888.8	12.8504	µm	Spot	Position	1	S100B-	Class B	440
66046.9	45912	12.5586	µm	Spot	Position	1	S100B-	Class B	441
66071.9	45946.4	12.7113	µm	Spot	Position	1	S100B-	Class B	443
66080.1	45949.8	12.2556	µm	Spot	Position	1	S100B-	Class B	444
66101	45969.2	12.1768	µm	Spot	Position	1	S100B-	Class B	446
66097.1	45970.2	12.2179	µm	Spot	Position	1	S100B-	Class B	447
66089.9	45985.7	12.2777	µm	Spot	Position	1	S100B-	Class B	448
66111.6	45985.9	12.2919	µm	Spot	Position	1	S100B-	Class B	449
66109.1	45987.5	12.786	µm	Spot	Position	1	S100B-	Class B	450
66107	45988.7	12.7059	µm	Spot	Position	1	S100B-	Class B	451
66096.9	45984.1	13.0494	µm	Spot	Position	1	S100B-	Class B	452
66116.6	46008.7	12.4595	µm	Spot	Position	1	S100B-	Class B	453
66138.1	46014	12.1837	µm	Spot	Position	1	S100B-	Class B	455
66128	46017.7	12.1354	µm	Spot	Position	1	S100B-	Class B	456
66156.7	46027	12.0493	µm	Spot	Position	1	S100B-	Class B	457
66156.3	46031.7	12.0612	µm	Spot	Position	1	S100B-	Class B	458
66158.9	46033.9	12.2832	µm	Spot	Position	1	S100B-	Class B	459
66149.5	46029.5	12.403	µm	Spot	Position	1	S100B-	Class B	461
66131.9	46008.5	12.9215	µm	Spot	Position	1	S100B-	Class B	464
66127.2	46011.2	13.0684	µm	Spot	Position	1	S100B-	Class B	465
66200	46059.5	12.0893	µm	Spot	Position	1	S100B-	Class B	470
66246	46083.1	12.5928	µm	Spot	Position	1	S100B-	Class B	476
66257.8	46100	12.4777	µm	Spot	Position	1	S100B-	Class B	483
66239.2	46096.7	12.8979	µm	Spot	Position	1	S100B-	Class B	485
66249.9	46096.8	12.6436	µm	Spot	Position	1	S100B-	Class B	486
66270.2	46111.6	12.6151	µm	Spot	Position	1	S100B-	Class B	488
66275.6	46095	12.9099	µm	Spot	Position	1	S100B-	Class B	489
66302	46099.7	12.9831	µm	Spot	Position	1	S100B-	Class B	492
66300.8	46117.1	13.0307	µm	Spot	Position	1	S100B-	Class B	496
66316.4	46127.3	12.1283	µm	Spot	Position	1	S100B-	Class B	498
66349.1	46133.9	12.0847	µm	Spot	Position	1	S100B-	Class B	499
66312.7	46122.9	12.4505	µm	Spot	Position	1	S100B-	Class B	500
66335.6	46121.8	12.803	µm	Spot	Position	1	S100B-	Class B	501
66320.7	46126.9	12.96	µm	Spot	Position	1	S100B-	Class B	504
66332.9	46128.2	12.9527	µm	Spot	Position	1	S100B-	Class B	505
66323.9	46134.5	13.0022	µm	Spot	Position	1	S100B-	Class B	506
66343.8	46139	13.1536	µm	Spot	Position	1	S100B-	Class B	507
66370.4	46124.4	12.1561	µm	Spot	Position	1	S100B-	Class B	508
66419.5	46128.3	12.1499	µm	Spot	Position	1	S100B-	Class B	511
66447.3	46136.9	12.5112	µm	Spot	Position	1	S100B-	Class B	512
66427.1	46132.7	12.8045	µm	Spot	Position	1	S100B-	Class B	514
66422.1	46127.2	12.9841	µm	Spot	Position	1	S100B-	Class B	515
66435.3	46127.3	12.939	µm	Spot	Position	1	S100B-	Class B	516
66449.5	46127.1	12.0891	µm	Spot	Position	1	S100B-	Class B	517
66465.4	46128.2	12.2482	µm	Spot	Position	1	S100B-	Class B	518
66483	46131.5	12.1667	µm	Spot	Position	1	S100B-	Class B	519
66456.4	46132.6	12.2118	µm	Spot	Position	1	S100B-	Class B	520
66330.5	46139.6	12.8356	µm	Spot	Position	1	S100B-	Class B	526
66346.9	46139.2	12.9832	µm	Spot	Position	1	S100B-	Class B	527
66333.6	46139.8	13.0516	µm	Spot	Position	1	S100B-	Class B	528
66395.5	46140.5	12.2314	µm	Spot	Position	1	S100B-	Class B	529
66440	46140.4	12.198	µm	Spot	Position	1	S100B-	Class B	533
66439.5	46145.7	13.1644	µm	Spot	Position	1	S100B-	Class B	535
66444.7	46148.1	13.0966	µm	Spot	Position	1	S100B-	Class B	536
66449.3	46148.9	12.0848	µm	Spot	Position	1	S100B-	Class B	537
66489.4	46147.5	12.9621	µm	Spot	Position	1	S100B-	Class B	539
66501.7	46147.8	12.1617	µm	Spot	Position	1	S100B-	Class B	540
66076.2	45307.3	14.0137	µm	Spot	Position	1	S100B-	Class B	542
66074.1	45321.7	13.5184	µm	Spot	Position	1	S100B-	Class B	543
66072.9	45334.5	14.0569	µm	Spot	Position	1	S100B-	Class B	544
66072	45319.3	14.1422	µm	Spot	Position	1	S100B-	Class B	545
66041.6	45573.2	14.2402	µm	Spot	Position	1	S100B-	Class B	548
66150.9	46034.1	13.2464	µm	Spot	Position	1	S100B-	Class B	550
66150	46015.9	13.6472	µm	Spot	Position	1	S100B-	Class B	551
66173.2	46025.7	13.5907	µm	Spot	Position	1	S100B-	Class B	553
66177.5	46029.8	13.6203	µm	Spot	Position	1	S100B-	Class B	554
66172.3	46033	13.6713	µm	Spot	Position	1	S100B-	Class B	555
66195.8	46039.2	14.1848	µm	Spot	Position	1	S100B-	Class B	557
66188.8	46053	13.7152	µm	Spot	Position	1	S100B-	Class B	558
66216.8	46078.8	13.6421	µm	Spot	Position	1	S100B-	Class B	559
66211.8	46071.4	14.0054	µm	Spot	Position	1	S100B-	Class B	561
66208.5	46060.2	14.34	µm	Spot	Position	1	S100B-	Class B	562
66215.3	46070.2	14.3795	µm	Spot	Position	1	S100B-	Class B	563
66250.3	46092.6	13.2458	µm	Spot	Position	1	S100B-	Class B	565
66231.3	46073.5	14.0428	µm	Spot	Position	1	S100B-	Class B	568
66221.7	46055.4	14.1285	µm	Spot	Position	1	S100B-	Class B	569
66225.4	46056.1	14.2892	µm	Spot	Position	1	S100B-	Class B	570
66235.2	46065	14.1275	µm	Spot	Position	1	S100B-	Class B	571
66229.3	46087.4	14.1488	µm	Spot	Position	1	S100B-	Class B	573
66257.8	46098.6	13.9367	µm	Spot	Position	1	S100B-	Class B	577
66287.8	46117.2	13.3373	µm	Spot	Position	1	S100B-	Class B	579
66305.6	46124.6	13.4393	µm	Spot	Position	1	S100B-	Class B	580
66297.7	46097.2	13.6963	µm	Spot	Position	1	S100B-	Class B	581
66294.7	46118.1	13.5812	µm	Spot	Position	1	S100B-	Class B	582
66282.1	46108.3	14.0399	µm	Spot	Position	1	S100B-	Class B	583
66300.9	46109	14.3608	µm	Spot	Position	1	S100B-	Class B	586
66342.1	46119.9	13.3977	µm	Spot	Position	1	S100B-	Class B	587
66322.2	46108.3	13.6573	µm	Spot	Position	1	S100B-	Class B	589
66343.3	46120.4	14.2992	µm	Spot	Position	1	S100B-	Class B	592
66395.7	46131.8	13.4129	µm	Spot	Position	1	S100B-	Class B	593
66402.9	46136.3	13.7937	µm	Spot	Position	1	S100B-	Class B	595
66390.8	46135.2	14.124	µm	Spot	Position	1	S100B-	Class B	596
66421.3	46133.6	13.454	µm	Spot	Position	1	S100B-	Class B	598
66433.7	46136.4	13.4098	µm	Spot	Position	1	S100B-	Class B	599
66419.5	46138.8	13.2869	µm	Spot	Position	1	S100B-	Class B	600
66448.6	46123.6	14.0736	µm	Spot	Position	1	S100B-	Class B	601
66487.4	46125.5	13.3841	µm	Spot	Position	1	S100B-	Class B	603
66464.6	46138.5	13.2978	µm	Spot	Position	1	S100B-	Class B	604
66449.3	46125.8	13.7316	µm	Spot	Position	1	S100B-	Class B	605
66489.5	46120.1	13.8911	µm	Spot	Position	1	S100B-	Class B	606
66452.1	46136	13.8862	µm	Spot	Position	1	S100B-	Class B	607
66452.3	46123.8	14.1787	µm	Spot	Position	1	S100B-	Class B	608
66463.1	46136.5	14.154	µm	Spot	Position	1	S100B-	Class B	609
66353.2	46143.4	14.0932	µm	Spot	Position	1	S100B-	Class B	611
66338.5	46146.6	14.2098	µm	Spot	Position	1	S100B-	Class B	612
66441.7	46148.7	13.8883	µm	Spot	Position	1	S100B-	Class B	615
66452.4	46155.3	13.8611	µm	Spot	Position	1	S100B-	Class B	616
66503.1	46142.9	14.1995	µm	Spot	Position	1	S100B-	Class B	619
66183.2	46051.3	14.6606	µm	Spot	Position	1	S100B-	Class B	622
66290.4	46108.3	14.6708	µm	Spot	Position	1	S100B-	Class B	629
66348.9	46115.3	14.6482	µm	Spot	Position	1	S100B-	Class B	631
66351	46122.1	14.4154	µm	Spot	Position	1	S100B-	Class B	632
66392.1	46137.8	14.6186	µm	Spot	Position	1	S100B-	Class B	633
66429	46124.9	14.4509	µm	Spot	Position	1	S100B-	Class B	634
66461	46125.8	14.5487	µm	Spot	Position	1	S100B-	Class B	635
66493.6	46133.2	14.4336	µm	Spot	Position	1	S100B-	Class B	636
66504.9	46125.3	14.5229	µm	Spot	Position	1	S100B-	Class B	637
66497.7	46126.3	14.6284	µm	Spot	Position	1	S100B-	Class B	639
66363.3	46143.5	14.4145	µm	Spot	Position	1	S100B-	Class B	640
66441.9	46145.2	14.4504	µm	Spot	Position	1	S100B-	Class B	641
66499.3	46146.2	14.5211	µm	Spot	Position	1	S100B-	Class B	644
66167.7	44413.8	2.96626	µm	Spot	Position	1	S100B+;S100B-	Class A;Class B	0

## Sheet: Sample 3-Dio2+S100b-Position - 
AC350 Dio2 555 S100b 488_[ii23_TileScan_1_Merged_Image_24]_Position
Position
====================
Position X	Position Y	Position Z	Unit	Category	Collection	Time	dapi	s100b	ID
95347.1	40774.6	0.1501	µm	Spot	Position	1	Class A		3
95420.8	40138.2	11.4612	µm	Spot	Position	1	Class A		54
95420.5	40140	11.441	µm	Spot	Position	1	Class A		55
95420.3	40136.7	11.8817	µm	Spot	Position	1	Class A		56
95419	40138.3	11.9073	µm	Spot	Position	1	Class A		57
95419.3	40140.9	11.8744	µm	Spot	Position	1	Class A		58
95324.4	39478.5	13.1673	µm	Spot	Position	1	Class A		77
95295.8	39619.5	13.047	µm	Spot	Position	1	Class A		86
95369.1	39946	12.8275	µm	Spot	Position	1	Class A		117
95419.8	40135.2	12.1061	µm	Spot	Position	1	Class A		130
95419.4	40134.2	12.495	µm	Spot	Position	1	Class A		131
95417.8	40137.9	12.42	µm	Spot	Position	1	Class A		132
95416.9	40137.4	12.786	µm	Spot	Position	1	Class A		133
95416.9	40141.5	12.6557	µm	Spot	Position	1	Class A		134
95417.8	40133.2	13.0426	µm	Spot	Position	1	Class A		135
95418.5	40144.2	12.6844	µm	Spot	Position	1	Class A		136
95417.7	40144.7	13.0425	µm	Spot	Position	1	Class A		137
95386.6	40710.4	12.734	µm	Spot	Position	1	Class A		168
95226.5	40882.7	12.8585	µm	Spot	Position	1	Class A		171
95240.4	40856	12.9598	µm	Spot	Position	1	Class A		172
95322.2	39552.1	13.4011	µm	Spot	Position	1	Class A		222
95299.4	39585.9	13.4223	µm	Spot	Position	1	Class A		225
95291.4	39623.6	14.11	µm	Spot	Position	1	Class A		240
95312.6	39624.9	14.1313	µm	Spot	Position	1	Class A		241
95297.3	39655.7	13.9983	µm	Spot	Position	1	Class A		250
95317.6	39815.1	13.9514	µm	Spot	Position	1	Class A		326
95355.1	39926.4	13.6256	µm	Spot	Position	1	Class A		369
95389.8	40040	14.1787	µm	Spot	Position	1	Class A		386
95416	40136.3	13.3099	µm	Spot	Position	1	Class A		393
95415.8	40139	13.5344	µm	Spot	Position	1	Class A		394
95414.5	40139.9	13.9387	µm	Spot	Position	1	Class A		396
95414.1	40138.5	14.1395	µm	Spot	Position	1	Class A		399
95495.2	40390.5	14.2819	µm	Spot	Position	1	Class A		442
95529.7	40513.2	13.9254	µm	Spot	Position	1	Class A		480
95528.8	40515	13.7137	µm	Spot	Position	1	Class A		513
95479.1	40568.1	13.286	µm	Spot	Position	1	Class A		527
95419.4	40641.8	13.9106	µm	Spot	Position	1	Class A		548
95470.2	40634.7	14.1862	µm	Spot	Position	1	Class A		556
95388.9	40710.7	13.4239	µm	Spot	Position	1	Class A		563
95386.1	40712.8	13.3586	µm	Spot	Position	1	Class A		564
95388.8	40709.9	13.6924	µm	Spot	Position	1	Class A		565
95391.9	40710.1	13.7522	µm	Spot	Position	1	Class A		566
95390.3	40707.1	13.8804	µm	Spot	Position	1	Class A		567
95390.1	40708.5	13.9764	µm	Spot	Position	1	Class A		569
95391.4	40708.4	13.8767	µm	Spot	Position	1	Class A		570
95392.8	40709.5	14.0781	µm	Spot	Position	1	Class A		571
95389.9	40712	13.9643	µm	Spot	Position	1	Class A		572
95387.9	40712.9	13.9251	µm	Spot	Position	1	Class A		573
95393.9	40710.6	14.1818	µm	Spot	Position	1	Class A		574
95394.7	40712	14.2861	µm	Spot	Position	1	Class A		575
95392.3	40712.6	14.2102	µm	Spot	Position	1	Class A		576
95395.7	40713.1	14.3702	µm	Spot	Position	1	Class A		577
95395.4	40714	14.4019	µm	Spot	Position	1	Class A		578
95394.6	40714.1	14.2784	µm	Spot	Position	1	Class A		579
95393.6	40714.5	14.1627	µm	Spot	Position	1	Class A		580
95388.8	40714.8	14.2576	µm	Spot	Position	1	Class A		581
95330.5	40762.6	14.3567	µm	Spot	Position	1	Class A		583
95219.1	40882.6	13.9648	µm	Spot	Position	1	Class A		596
95203.3	40924.2	13.9241	µm	Spot	Position	1	Class A		617
95034.4	40966.3	13.612	µm	Spot	Position	1	Class A		621
95289.5	39588.9	15.4959	µm	Spot	Position	1	Class A		792
95286.7	39595.4	15.3351	µm	Spot	Position	1	Class A		835
95293.9	39626.4	14.8009	µm	Spot	Position	1	Class A		843
95313.6	39813.3	15.2231	µm	Spot	Position	1	Class A		1115
95332.4	39852.2	14.6554	µm	Spot	Position	1	Class A		1173
95321.5	39829.2	15.1359	µm	Spot	Position	1	Class A		1178
95333.2	39865.8	15.5389	µm	Spot	Position	1	Class A		1184
95336	39874.6	14.6045	µm	Spot	Position	1	Class A		1253
95333.3	39870	15.5585	µm	Spot	Position	1	Class A		1259
95355.6	39939.9	15.1574	µm	Spot	Position	1	Class A		1322
95359	39976.9	15.182	µm	Spot	Position	1	Class A		1399
95382.6	40021.8	15.0104	µm	Spot	Position	1	Class A		1445
95383.8	40023.5	14.9576	µm	Spot	Position	1	Class A		1448
95422	40109.6	15.1315	µm	Spot	Position	1	Class A		1480
95468.3	40306.5	15.481	µm	Spot	Position	1	Class A		1581
95475.1	40409	15.2454	µm	Spot	Position	1	Class A		1605
95476.3	40398.4	15.1417	µm	Spot	Position	1	Class A		1608
95459.5	40539.8	15.1068	µm	Spot	Position	1	Class A		1735
95455.6	40538.1	15.5423	µm	Spot	Position	1	Class A		1738
95434.1	40584.1	14.8871	µm	Spot	Position	1	Class A		1795
95433.6	40580.5	15.5579	µm	Spot	Position	1	Class A		1811
95514.2	40569.5	15.4808	µm	Spot	Position	1	Class A		1832
95418	40648.8	14.6722	µm	Spot	Position	1	Class A		1842
95420.7	40642	14.9016	µm	Spot	Position	1	Class A		1844
95418.1	40644.9	14.7481	µm	Spot	Position	1	Class A		1845
95434.4	40605.9	14.6017	µm	Spot	Position	1	Class A		1853
95433.7	40607	14.4785	µm	Spot	Position	1	Class A		1855
95429.8	40623.8	15.451	µm	Spot	Position	1	Class A		1884
95415.4	40682.4	14.634	µm	Spot	Position	1	Class A		1905
95412	40658.2	15.1657	µm	Spot	Position	1	Class A		1908
95419.3	40679	15.031	µm	Spot	Position	1	Class A		1909
95369.9	40720.8	15.182	µm	Spot	Position	1	Class A		1937
95381	40728.2	15.052	µm	Spot	Position	1	Class A		1940
95353.7	40742.4	15.1945	µm	Spot	Position	1	Class A		1941
95372.5	40714.7	15.4765	µm	Spot	Position	1	Class A		1944
95396.5	40712.4	14.4753	µm	Spot	Position	1	Class A		1946
95390.6	40713.3	14.4729	µm	Spot	Position	1	Class A		1947
95396.9	40713.9	14.4098	µm	Spot	Position	1	Class A		1948
95391.6	40714.7	14.6204	µm	Spot	Position	1	Class A		1949
95397.1	40714.7	14.6718	µm	Spot	Position	1	Class A		1950
95389.2	40717	15.1396	µm	Spot	Position	1	Class A		1953
95390.6	40717.1	15.0145	µm	Spot	Position	1	Class A		1954
95392.3	40717	15.1225	µm	Spot	Position	1	Class A		1955
95390.3	40720.1	15.1091	µm	Spot	Position	1	Class A		1956
95387.1	40715.4	15.4898	µm	Spot	Position	1	Class A		1961
95395	40716.8	15.4853	µm	Spot	Position	1	Class A		1962
95394	40717.6	15.3984	µm	Spot	Position	1	Class A		1963
95390.5	40718.8	15.4633	µm	Spot	Position	1	Class A		1964
95329.8	40759.6	15.2349	µm	Spot	Position	1	Class A		2007
95321.9	40782.1	15.2242	µm	Spot	Position	1	Class A		2009
95340.6	40748.3	15.526	µm	Spot	Position	1	Class A		2019
95338.1	40751.3	15.3546	µm	Spot	Position	1	Class A		2020
95180.3	40880.7	15.4766	µm	Spot	Position	1	Class A		2098
95219.1	40880.5	14.587	µm	Spot	Position	1	Class A		2102
95227.6	40881	14.4934	µm	Spot	Position	1	Class A		2103
95215.4	40871	14.9398	µm	Spot	Position	1	Class A		2109
95222.1	40872.5	14.795	µm	Spot	Position	1	Class A		2111
95216.9	40875.4	14.8043	µm	Spot	Position	1	Class A		2112
95215.2	40876.1	14.8799	µm	Spot	Position	1	Class A		2114
95231.9	40865.1	15.4278	µm	Spot	Position	1	Class A		2128
95231.2	40876.1	15.5093	µm	Spot	Position	1	Class A		2129
95245.6	40860.4	14.8978	µm	Spot	Position	1	Class A		2134
95259.9	40851	15.2285	µm	Spot	Position	1	Class A		2137
95145.2	40891.9	15.4153	µm	Spot	Position	1	Class A		2159
95215.1	40891.6	14.6988	µm	Spot	Position	1	Class A		2181
95213.7	40891.6	14.7619	µm	Spot	Position	1	Class A		2183
95227.4	40893.1	14.8586	µm	Spot	Position	1	Class A		2184
95224.7	40894.5	15.2686	µm	Spot	Position	1	Class A		2189
95044.1	40996.7	14.9196	µm	Spot	Position	1	Class A		2239
95283.7	39578.3	16.014	µm	Spot	Position	1	Class A		2499
95302.7	39690.9	15.6155	µm	Spot	Position	1	Class A		2686
95303	39705.3	15.8141	µm	Spot	Position	1	Class A		2687
95304.9	39720	15.9717	µm	Spot	Position	1	Class A		2693
95302.6	39721.5	16.7341	µm	Spot	Position	1	Class A		2698
95304.6	39728.5	16.3178	µm	Spot	Position	1	Class A		2789
95321.9	39826.7	15.8133	µm	Spot	Position	1	Class A		2999
95409.4	40121	16.7833	µm	Spot	Position	1	Class A		3549
95445.4	40261.8	15.9648	µm	Spot	Position	1	Class A		3755
95449.5	40318.4	16.4186	µm	Spot	Position	1	Class A		3849
95474	40387.3	16.1594	µm	Spot	Position	1	Class A		3986
95475.3	40399	16.3767	µm	Spot	Position	1	Class A		3996
95475.1	40499.8	16.3266	µm	Spot	Position	1	Class A		4244
95477.5	40489.4	15.9591	µm	Spot	Position	1	Class A		4263
95451.5	40535.8	15.7313	µm	Spot	Position	1	Class A		4389
95452.9	40541.9	15.7882	µm	Spot	Position	1	Class A		4390
95448.3	40544.7	15.7475	µm	Spot	Position	1	Class A		4391
95449.2	40547.4	15.8553	µm	Spot	Position	1	Class A		4392
95457.7	40520.4	16.0915	µm	Spot	Position	1	Class A		4395
95456.5	40521.4	16.179	µm	Spot	Position	1	Class A		4396
95454.2	40536	16.0249	µm	Spot	Position	1	Class A		4399
95446.6	40555.5	16.3122	µm	Spot	Position	1	Class A		4409
95455.8	40533.3	16.7353	µm	Spot	Position	1	Class A		4413
95485.5	40553.4	16.2986	µm	Spot	Position	1	Class A		4434
95437.7	40582.5	15.9758	µm	Spot	Position	1	Class A		4524
95415.6	40644.4	16.3754	µm	Spot	Position	1	Class A		4629
95418.7	40683.3	16.1839	µm	Spot	Position	1	Class A		4759
95402.9	40687.4	15.9356	µm	Spot	Position	1	Class A		4762
95413.4	40689	16.3919	µm	Spot	Position	1	Class A		4772
95392.1	40691.9	16.3619	µm	Spot	Position	1	Class A		4774
95384.3	40692.6	16.4275	µm	Spot	Position	1	Class A		4775
95409.3	40660.1	16.8047	µm	Spot	Position	1	Class A		4779
95407.7	40692.4	16.8097	µm	Spot	Position	1	Class A		4789
95382.4	40720	15.7817	µm	Spot	Position	1	Class A		4949
95368.7	40720.3	15.7688	µm	Spot	Position	1	Class A		4950
95356.2	40721.6	15.6153	µm	Spot	Position	1	Class A		4951
95382	40722.4	15.6621	µm	Spot	Position	1	Class A		4952
95360.1	40726.5	15.7469	µm	Spot	Position	1	Class A		4953
95370.5	40732.4	15.6624	µm	Spot	Position	1	Class A		4955
95361.7	40727.7	16.0056	µm	Spot	Position	1	Class A		4959
95362.3	40733.1	16.1806	µm	Spot	Position	1	Class A		4960
95361.2	40735.4	15.9754	µm	Spot	Position	1	Class A		4961
95355.3	40741.4	16.0435	µm	Spot	Position	1	Class A		4963
95355.2	40715.7	16.2855	µm	Spot	Position	1	Class A		4967
95364.4	40720.2	16.4116	µm	Spot	Position	1	Class A		4971
95343.8	40744.2	16.2269	µm	Spot	Position	1	Class A		4979
95357.8	40723	16.6857	µm	Spot	Position	1	Class A		4982
95384.7	40717.6	16.541	µm	Spot	Position	1	Class A		4997
95392.3	40723.7	16.7657	µm	Spot	Position	1	Class A		4999
95332.9	40759.2	15.7868	µm	Spot	Position	1	Class A		5139
95323.9	40769.1	15.8958	µm	Spot	Position	1	Class A		5140
95335.4	40752.4	16.1093	µm	Spot	Position	1	Class A		5147
95316.5	40784.9	15.9378	µm	Spot	Position	1	Class A		5150
95318	40788.7	16.034	µm	Spot	Position	1	Class A		5151
95335.9	40760.4	16.2313	µm	Spot	Position	1	Class A		5152
95335.5	40763.2	16.2559	µm	Spot	Position	1	Class A		5155
95324.1	40773.8	16.416	µm	Spot	Position	1	Class A		5157
95324.1	40776.1	16.2398	µm	Spot	Position	1	Class A		5158
95314.4	40787.3	16.5016	µm	Spot	Position	1	Class A		5159
95344.4	40770	15.7077	µm	Spot	Position	1	Class A		5169
95342.5	40746.4	16.7104	µm	Spot	Position	1	Class A		5177
95284.8	40817.5	15.9613	µm	Spot	Position	1	Class A		5306
95261.4	40835.4	16.6747	µm	Spot	Position	1	Class A		5318
95298.2	40796.9	15.6433	µm	Spot	Position	1	Class A		5319
95293.5	40802.8	15.9656	µm	Spot	Position	1	Class A		5320
95305.8	40802.8	16.4791	µm	Spot	Position	1	Class A		5324
95291.2	40815.6	16.2208	µm	Spot	Position	1	Class A		5325
95311	40793.9	16.7449	µm	Spot	Position	1	Class A		5328
95297.8	40794	16.7379	µm	Spot	Position	1	Class A		5329
95183.5	40881.7	16.666	µm	Spot	Position	1	Class A		5447
95231.2	40873.5	15.6744	µm	Spot	Position	1	Class A		5451
95216.9	40878.1	15.8839	µm	Spot	Position	1	Class A		5453
95203.8	40868.9	16.5071	µm	Spot	Position	1	Class A		5463
95213	40872.7	16.5046	µm	Spot	Position	1	Class A		5464
95239.3	40873.3	16.3675	µm	Spot	Position	1	Class A		5465
95210.8	40874.2	16.2198	µm	Spot	Position	1	Class A		5466
95210.9	40872.3	16.7616	µm	Spot	Position	1	Class A		5478
95232.3	40874.1	16.5486	µm	Spot	Position	1	Class A		5480
95207.7	40874.5	16.7303	µm	Spot	Position	1	Class A		5481
95260	40840.7	16.7023	µm	Spot	Position	1	Class A		5492
95248.2	40862.1	16.697	µm	Spot	Position	1	Class A		5494
95097.4	40915	16.7213	µm	Spot	Position	1	Class A		5562
95221.9	40897.2	15.8203	µm	Spot	Position	1	Class A		5616
95208.4	40910.6	15.6867	µm	Spot	Position	1	Class A		5618
95221.3	40895.2	16.4842	µm	Spot	Position	1	Class A		5625
95189.6	40932.4	16.7724	µm	Spot	Position	1	Class A		5706
95157.5	40933.5	16.6513	µm	Spot	Position	1	Class A		5707
95290.9	39601.5	17.6954	µm	Spot	Position	1	Class A		6190
95291.3	39589.9	17.9687	µm	Spot	Position	1	Class A		6209
95322.6	39738.2	17.2421	µm	Spot	Position	1	Class A		6478
95422.6	40155.4	16.9988	µm	Spot	Position	1	Class A		7476
95421.1	40171.1	17.2263	µm	Spot	Position	1	Class A		7481
95446.6	40264	17.254	µm	Spot	Position	1	Class A		7734
95474.7	40501.6	16.9841	µm	Spot	Position	1	Class A		8518
95534.7	40471.1	17.8615	µm	Spot	Position	1	Class A		8592
95457.2	40537.3	17.1406	µm	Spot	Position	1	Class A		8714
95445.9	40564.5	17.529	µm	Spot	Position	1	Class A		8857
95443.1	40565.8	17.7103	µm	Spot	Position	1	Class A		8858
95472.6	40641.5	16.8919	µm	Spot	Position	1	Class A		9034
95406.4	40667.1	16.8612	µm	Spot	Position	1	Class A		9187
95412.7	40688.4	16.9476	µm	Spot	Position	1	Class A		9199
95389.5	40693.1	16.9389	µm	Spot	Position	1	Class A		9200
95396.9	40683	17.9507	µm	Spot	Position	1	Class A		9221
95397.7	40689.8	17.7394	µm	Spot	Position	1	Class A		9224
95379.2	40699.9	16.8947	µm	Spot	Position	1	Class A		9457
95355.5	40725.1	16.9962	µm	Spot	Position	1	Class A		9466
95363.6	40720.8	17.3564	µm	Spot	Position	1	Class A		9474
95367.4	40716	17.4399	µm	Spot	Position	1	Class A		9485
95366.5	40741.7	17.4386	µm	Spot	Position	1	Class A		9491
95385.5	40700.5	16.9271	µm	Spot	Position	1	Class A		9503
95396.9	40704.2	17.7875	µm	Spot	Position	1	Class A		9513
95303.8	40785.5	16.9921	µm	Spot	Position	1	Class A		9686
95331.6	40761.4	17.1752	µm	Spot	Position	1	Class A		9691
95333.6	40761.6	17.9208	µm	Spot	Position	1	Class A		9709
95327.4	40761.9	17.7278	µm	Spot	Position	1	Class A		9710
95338	40749.7	16.8441	µm	Spot	Position	1	Class A		9713
95263.6	40832.8	17.2809	µm	Spot	Position	1	Class A		9881
95259.2	40836.3	17.5115	µm	Spot	Position	1	Class A		9889
95262.6	40834.2	17.811	µm	Spot	Position	1	Class A		9897
95295.3	40796.1	17.3246	µm	Spot	Position	1	Class A		9903
95182.3	40879.2	17.7595	µm	Spot	Position	1	Class A		10049
95213.9	40876.1	17.5027	µm	Spot	Position	1	Class A		10065
95213.3	40874.4	17.8603	µm	Spot	Position	1	Class A		10074
95269.5	40839.7	17.1803	µm	Spot	Position	1	Class A		10082
95255.1	40841.8	17.6243	µm	Spot	Position	1	Class A		10089
95251.1	40844.3	17.6668	µm	Spot	Position	1	Class A		10090
95105.1	40906.8	16.8989	µm	Spot	Position	1	Class A		10184
95165.6	40890.4	17.9846	µm	Spot	Position	1	Class A		10240
95096.9	40961.5	17.0106	µm	Spot	Position	1	Class A		10326
95161.1	40931.6	17.1346	µm	Spot	Position	1	Class A		10364
95284	39548.3	18.1309	µm	Spot	Position	1	Class A		10717
95314.1	39571	18.6993	µm	Spot	Position	1	Class A		10728
95380	39964.6	18.6241	µm	Spot	Position	1	Class A		11328
95373.9	40006.6	18.1448	µm	Spot	Position	1	Class A		11409
95446.6	40279.7	19.0987	µm	Spot	Position	1	Class A		12139
95453.8	40541.1	18.7887	µm	Spot	Position	1	Class A		13152
95449.9	40548.1	19.1733	µm	Spot	Position	1	Class A		13160
95381.5	40696.5	18.9602	µm	Spot	Position	1	Class A		13653
95385.4	40695.4	18.1088	µm	Spot	Position	1	Class A		13662
95383.9	40696.7	18.7062	µm	Spot	Position	1	Class A		13674
95444.4	40657.3	18.2421	µm	Spot	Position	1	Class A		13685
95447.1	40657.7	18.5915	µm	Spot	Position	1	Class A		13690
95444.6	40665.2	18.3506	µm	Spot	Position	1	Class A		13691
95361.2	40714	18.2045	µm	Spot	Position	1	Class A		13940
95358	40721.5	18.2414	µm	Spot	Position	1	Class A		13941
95382	40704.6	18.6604	µm	Spot	Position	1	Class A		13956
95379.6	40720.2	18.7798	µm	Spot	Position	1	Class A		13962
95380.1	40699.3	19.0682	µm	Spot	Position	1	Class A		13969
95385.1	40698.4	18.8259	µm	Spot	Position	1	Class A		13988
95396.3	40706.1	18.833	µm	Spot	Position	1	Class A		13990
95315.9	40789	18.2543	µm	Spot	Position	1	Class A		14187
95301.7	40787.6	18.5323	µm	Spot	Position	1	Class A		14193
95336.3	40753.2	19.1641	µm	Spot	Position	1	Class A		14205
95340.8	40745.4	18.2212	µm	Spot	Position	1	Class A		14213
95301.7	40810.9	18.561	µm	Spot	Position	1	Class A		14418
95296.7	40796.9	19.0351	µm	Spot	Position	1	Class A		14423
95203.7	40876.6	18.4306	µm	Spot	Position	1	Class A		14604
95205.9	40869.5	18.6973	µm	Spot	Position	1	Class A		14614
95212.2	40877	18.8278	µm	Spot	Position	1	Class A		14615
95203.2	40877.4	18.8853	µm	Spot	Position	1	Class A		14616
95258.5	40839.8	19.0297	µm	Spot	Position	1	Class A		14651
95187.5	40928.5	18.2895	µm	Spot	Position	1	Class A		14803
95056.8	40986.4	19.1157	µm	Spot	Position	1	Class A		15026
95378.8	39953.2	19.3006	µm	Spot	Position	1	Class A		15126
95447.2	40281	19.4513	µm	Spot	Position	1	Class A		15418
95404.5	40668.3	19.3777	µm	Spot	Position	1	Class A		16280
95396	40693.7	19.3834	µm	Spot	Position	1	Class A		16289
95381	40719.3	19.4635	µm	Spot	Position	1	Class A		16449
95382	40701.1	19.7853	µm	Spot	Position	1	Class A		16451
95369.8	40732.4	19.5629	µm	Spot	Position	1	Class A		16461
95343.9	40744.6	19.5011	µm	Spot	Position	1	Class A		16569
95490.9	40525.4	3.26714	µm	Spot	Position	1	Class B	S100B+	7
95491.1	40527.5	6.99541	µm	Spot	Position	1	Class B	S100B+	10
95497.4	40430.2	7.72691	µm	Spot	Position	1	Class B	S100B+	13
95498.1	40430.7	8.08715	µm	Spot	Position	1	Class B	S100B+	14
95489.6	40529.1	7.45298	µm	Spot	Position	1	Class B	S100B+	15
95490	40532.2	8.55882	µm	Spot	Position	1	Class B	S100B+	23
95497.1	40527.3	9.2028	µm	Spot	Position	1	Class B	S100B+	24
95499.5	40561.8	9.58651	µm	Spot	Position	1	Class B	S100B+	25
95449.8	40636.6	8.75912	µm	Spot	Position	1	Class B	S100B+	26
95498.7	40432.2	10.4725	µm	Spot	Position	1	Class B	S100B+	29
95473.3	40528.2	9.84771	µm	Spot	Position	1	Class B	S100B+	30
95482.2	40537.1	9.61108	µm	Spot	Position	1	Class B	S100B+	32
95494.6	40528.9	10.6735	µm	Spot	Position	1	Class B	S100B+	33
95493.8	40529.2	10.6417	µm	Spot	Position	1	Class B	S100B+	34
95428	40640.5	10.7258	µm	Spot	Position	1	Class B	S100B+	36
95449.9	40637.7	9.7412	µm	Spot	Position	1	Class B	S100B+	37
95285.8	39471.2	11.6325	µm	Spot	Position	1	Class B	S100B+	39
95494.7	40410.8	11.3455	µm	Spot	Position	1	Class B	S100B+	59
95494.7	40414.1	11.1693	µm	Spot	Position	1	Class B	S100B+	60
95501.9	40440.9	11.385	µm	Spot	Position	1	Class B	S100B+	63
95465.8	40538.3	11.7292	µm	Spot	Position	1	Class B	S100B+	66
95495.4	40528.4	11.5165	µm	Spot	Position	1	Class B	S100B+	68
95476.8	40533	11.5278	µm	Spot	Position	1	Class B	S100B+	69
95481.6	40549.1	11.8922	µm	Spot	Position	1	Class B	S100B+	70
95174.5	40915.2	11.5868	µm	Spot	Position	1	Class B	S100B+	73
95297.7	39584.5	13.1341	µm	Spot	Position	1	Class B	S100B+	82
95302.9	39638.6	12.9782	µm	Spot	Position	1	Class B	S100B+	90
95331.2	39820.1	13.0036	µm	Spot	Position	1	Class B	S100B+	101
95356.1	39922.3	13.1358	µm	Spot	Position	1	Class B	S100B+	118
95366.4	39943.5	13.0572	µm	Spot	Position	1	Class B	S100B+	119
95482.9	40381.9	12.3477	µm	Spot	Position	1	Class B	S100B+	142
95502.1	40422.7	12.0708	µm	Spot	Position	1	Class B	S100B+	143
95497.3	40510.4	12.0782	µm	Spot	Position	1	Class B	S100B+	144
95513.3	40509.9	12.7165	µm	Spot	Position	1	Class B	S100B+	145
95493.3	40513	12.8846	µm	Spot	Position	1	Class B	S100B+	146
95500	40501.7	13.0532	µm	Spot	Position	1	Class B	S100B+	147
95494	40510.9	13.0661	µm	Spot	Position	1	Class B	S100B+	148
95524.9	40476.1	12.745	µm	Spot	Position	1	Class B	S100B+	151
95523.4	40502.6	12.7	µm	Spot	Position	1	Class B	S100B+	152
95524.1	40503.4	12.6402	µm	Spot	Position	1	Class B	S100B+	153
95530.4	40484	13.1236	µm	Spot	Position	1	Class B	S100B+	154
95535.6	40485.8	13.1396	µm	Spot	Position	1	Class B	S100B+	155
95467.2	40540.1	12.0608	µm	Spot	Position	1	Class B	S100B+	156
95464.5	40529.2	12.7615	µm	Spot	Position	1	Class B	S100B+	157
95489.1	40537.2	12.4998	µm	Spot	Position	1	Class B	S100B+	158
95491	40533.4	12.7543	µm	Spot	Position	1	Class B	S100B+	160
95511.1	40516.4	13.1911	µm	Spot	Position	1	Class B	S100B+	161
95457.7	40567.9	12.569	µm	Spot	Position	1	Class B	S100B+	162
95457.4	40594.9	12.7941	µm	Spot	Position	1	Class B	S100B+	163
95455.2	40597	13.1083	µm	Spot	Position	1	Class B	S100B+	164
95492	40561	13.0097	µm	Spot	Position	1	Class B	S100B+	166
95147	40920.7	12.4604	µm	Spot	Position	1	Class B	S100B+	174
95169.6	40919.6	12.333	µm	Spot	Position	1	Class B	S100B+	176
95168.9	40920.1	12.4873	µm	Spot	Position	1	Class B	S100B+	177
95168.6	40921.5	12.6608	µm	Spot	Position	1	Class B	S100B+	178
95161	40926.6	12.9719	µm	Spot	Position	1	Class B	S100B+	180
95223.5	40885	12.2639	µm	Spot	Position	1	Class B	S100B+	181
95212.6	40887.7	12.54	µm	Spot	Position	1	Class B	S100B+	182
95322	39496.8	14.2403	µm	Spot	Position	1	Class B	S100B+	206
95320.7	39502.8	13.5275	µm	Spot	Position	1	Class B	S100B+	211
95291.9	39511.7	13.9938	µm	Spot	Position	1	Class B	S100B+	212
95319.6	39537.1	14.3318	µm	Spot	Position	1	Class B	S100B+	213
95306.5	39584.6	13.4357	µm	Spot	Position	1	Class B	S100B+	224
95303.2	39582.9	13.659	µm	Spot	Position	1	Class B	S100B+	226
95304.1	39572.4	14.0588	µm	Spot	Position	1	Class B	S100B+	227
95307.3	39575.7	14.3323	µm	Spot	Position	1	Class B	S100B+	228
95299.9	39610.3	14.1373	µm	Spot	Position	1	Class B	S100B+	238
95298.1	39622.9	14.2534	µm	Spot	Position	1	Class B	S100B+	239
95303.7	39628.7	14.1324	µm	Spot	Position	1	Class B	S100B+	242
95309.6	39646.1	14.0368	µm	Spot	Position	1	Class B	S100B+	249
95319	39783.4	13.8741	µm	Spot	Position	1	Class B	S100B+	324
95328.3	39789.8	14.36	µm	Spot	Position	1	Class B	S100B+	327
95319.5	39791.3	14.1607	µm	Spot	Position	1	Class B	S100B+	328
95336.3	39846	13.3827	µm	Spot	Position	1	Class B	S100B+	340
95336.6	39843.2	14.2421	µm	Spot	Position	1	Class B	S100B+	342
95339.3	39861	13.3653	µm	Spot	Position	1	Class B	S100B+	345
95375.6	39978.2	13.989	µm	Spot	Position	1	Class B	S100B+	373
95400.4	40074	14.3435	µm	Spot	Position	1	Class B	S100B+	389
95426.2	40126.1	13.8589	µm	Spot	Position	1	Class B	S100B+	395
95411.4	40102	14.239	µm	Spot	Position	1	Class B	S100B+	397
95416.3	40110.1	14.1867	µm	Spot	Position	1	Class B	S100B+	398
95439	40184	14.2427	µm	Spot	Position	1	Class B	S100B+	405
95445.4	40228.6	14.3411	µm	Spot	Position	1	Class B	S100B+	412
95472.2	40346.1	13.5754	µm	Spot	Position	1	Class B	S100B+	434
95488.6	40370.2	14.0738	µm	Spot	Position	1	Class B	S100B+	437
95476.6	40333.5	14.1739	µm	Spot	Position	1	Class B	S100B+	438
95478.5	40350.7	14.2123	µm	Spot	Position	1	Class B	S100B+	439
95482.5	40364.1	14.2808	µm	Spot	Position	1	Class B	S100B+	440
95492.2	40375.3	13.8948	µm	Spot	Position	1	Class B	S100B+	441
95500.4	40398.6	14.2003	µm	Spot	Position	1	Class B	S100B+	444
95499.3	40430.9	13.6669	µm	Spot	Position	1	Class B	S100B+	447
95504.2	40464.3	13.5626	µm	Spot	Position	1	Class B	S100B+	448
95520.8	40452.3	13.9624	µm	Spot	Position	1	Class B	S100B+	449
95490.7	40454.2	14.1904	µm	Spot	Position	1	Class B	S100B+	450
95486.2	40454.4	14.2147	µm	Spot	Position	1	Class B	S100B+	451
95503.9	40499.1	13.538	µm	Spot	Position	1	Class B	S100B+	457
95503.9	40500.2	13.7296	µm	Spot	Position	1	Class B	S100B+	458
95518.8	40505.4	14.1092	µm	Spot	Position	1	Class B	S100B+	459
95515.7	40507.7	14.0218	µm	Spot	Position	1	Class B	S100B+	460
95499.4	40508.1	14.0094	µm	Spot	Position	1	Class B	S100B+	461
95517.8	40508	14.0135	µm	Spot	Position	1	Class B	S100B+	462
95495.2	40509.5	14.1621	µm	Spot	Position	1	Class B	S100B+	463
95495.7	40512.6	14.1974	µm	Spot	Position	1	Class B	S100B+	464
95522.2	40502.8	13.4467	µm	Spot	Position	1	Class B	S100B+	468
95523.2	40476.6	13.7499	µm	Spot	Position	1	Class B	S100B+	470
95528.6	40469.7	13.8628	µm	Spot	Position	1	Class B	S100B+	473
95528.7	40480.1	13.9139	µm	Spot	Position	1	Class B	S100B+	474
95525.7	40499.7	13.9151	µm	Spot	Position	1	Class B	S100B+	478
95527.3	40500.4	13.8735	µm	Spot	Position	1	Class B	S100B+	479
95524.8	40508.4	14.1435	µm	Spot	Position	1	Class B	S100B+	482
95463.9	40535.2	13.3684	µm	Spot	Position	1	Class B	S100B+	486
95466.4	40535.4	13.4866	µm	Spot	Position	1	Class B	S100B+	487
95469.1	40530.8	13.6479	µm	Spot	Position	1	Class B	S100B+	488
95464.6	40547.7	13.6461	µm	Spot	Position	1	Class B	S100B+	489
95471.2	40514.6	14.0673	µm	Spot	Position	1	Class B	S100B+	490
95462.6	40531.4	13.9227	µm	Spot	Position	1	Class B	S100B+	491
95464.6	40543.4	13.857	µm	Spot	Position	1	Class B	S100B+	492
95496.2	40537	13.4103	µm	Spot	Position	1	Class B	S100B+	497
95485.8	40542.5	13.3415	µm	Spot	Position	1	Class B	S100B+	498
95511.3	40513.8	13.6899	µm	Spot	Position	1	Class B	S100B+	499
95497.7	40514.9	13.6412	µm	Spot	Position	1	Class B	S100B+	500
95488.3	40518.7	13.6759	µm	Spot	Position	1	Class B	S100B+	501
95490.1	40524.9	13.797	µm	Spot	Position	1	Class B	S100B+	503
95495.4	40535.8	13.6967	µm	Spot	Position	1	Class B	S100B+	504
95490.4	40536	13.7664	µm	Spot	Position	1	Class B	S100B+	505
95486.2	40537.5	13.9541	µm	Spot	Position	1	Class B	S100B+	507
95491.1	40538.7	13.9939	µm	Spot	Position	1	Class B	S100B+	508
95485.5	40518.6	14.2337	µm	Spot	Position	1	Class B	S100B+	509
95481.4	40543.8	14.2935	µm	Spot	Position	1	Class B	S100B+	510
95495	40552	14.3563	µm	Spot	Position	1	Class B	S100B+	511
95516.8	40558.3	14.1359	µm	Spot	Position	1	Class B	S100B+	512
95524.3	40538.5	14.0547	µm	Spot	Position	1	Class B	S100B+	514
95457.9	40594.1	13.4171	µm	Spot	Position	1	Class B	S100B+	515
95458.5	40597.3	13.3671	µm	Spot	Position	1	Class B	S100B+	516
95470.4	40584.1	13.6805	µm	Spot	Position	1	Class B	S100B+	517
95457.1	40599.6	13.6849	µm	Spot	Position	1	Class B	S100B+	518
95455.6	40574.7	14.0504	µm	Spot	Position	1	Class B	S100B+	520
95458.5	40598.4	13.9641	µm	Spot	Position	1	Class B	S100B+	521
95458.1	40605.3	13.8497	µm	Spot	Position	1	Class B	S100B+	522
95460.9	40568.6	14.3868	µm	Spot	Position	1	Class B	S100B+	523
95461.5	40570.1	14.2732	µm	Spot	Position	1	Class B	S100B+	524
95455.2	40603.7	14.1979	µm	Spot	Position	1	Class B	S100B+	525
95519.3	40559.8	13.4148	µm	Spot	Position	1	Class B	S100B+	526
95480.6	40574.7	13.3244	µm	Spot	Position	1	Class B	S100B+	528
95484.1	40565.3	13.9955	µm	Spot	Position	1	Class B	S100B+	530
95493.5	40566.5	13.8782	µm	Spot	Position	1	Class B	S100B+	532
95481.1	40566.9	13.9444	µm	Spot	Position	1	Class B	S100B+	533
95477.4	40590.4	13.8815	µm	Spot	Position	1	Class B	S100B+	534
95476.6	40595.5	14.0528	µm	Spot	Position	1	Class B	S100B+	535
95485	40563.8	14.3209	µm	Spot	Position	1	Class B	S100B+	536
95516.7	40564.3	14.3969	µm	Spot	Position	1	Class B	S100B+	537
95488.3	40564.6	14.2446	µm	Spot	Position	1	Class B	S100B+	538
95495.6	40568.1	14.3392	µm	Spot	Position	1	Class B	S100B+	539
95480.4	40570.3	14.2329	µm	Spot	Position	1	Class B	S100B+	540
95457	40614.7	13.3614	µm	Spot	Position	1	Class B	S100B+	549
95436.1	40610	13.7589	µm	Spot	Position	1	Class B	S100B+	550
95458.7	40617.3	13.525	µm	Spot	Position	1	Class B	S100B+	551
95460.8	40615.3	13.8322	µm	Spot	Position	1	Class B	S100B+	552
95460.9	40616.7	14.0218	µm	Spot	Position	1	Class B	S100B+	553
95461.5	40639.1	13.9554	µm	Spot	Position	1	Class B	S100B+	554
95386.8	40707.6	14.0939	µm	Spot	Position	1	Class B	S100B+	568
95339.3	40773.7	14.205	µm	Spot	Position	1	Class B	S100B+	588
95244	40855.6	13.7621	µm	Spot	Position	1	Class B	S100B+	594
95243.3	40859	13.7048	µm	Spot	Position	1	Class B	S100B+	595
95244.5	40859.5	14.1733	µm	Spot	Position	1	Class B	S100B+	597
95133.7	40924.4	13.7002	µm	Spot	Position	1	Class B	S100B+	601
95143.2	40905.7	14.3578	µm	Spot	Position	1	Class B	S100B+	602
95109.8	40920.3	14.3357	µm	Spot	Position	1	Class B	S100B+	604
95173.3	40908.6	13.4966	µm	Spot	Position	1	Class B	S100B+	605
95163.2	40924.1	13.6946	µm	Spot	Position	1	Class B	S100B+	607
95184.8	40924.8	14.0004	µm	Spot	Position	1	Class B	S100B+	608
95174.4	40909.4	14.2229	µm	Spot	Position	1	Class B	S100B+	609
95176.1	40916.2	14.34	µm	Spot	Position	1	Class B	S100B+	610
95215	40884.8	13.2485	µm	Spot	Position	1	Class B	S100B+	611
95221.4	40885	13.4323	µm	Spot	Position	1	Class B	S100B+	612
95213.9	40889.3	13.735	µm	Spot	Position	1	Class B	S100B+	614
95226.1	40888.2	14.0629	µm	Spot	Position	1	Class B	S100B+	615
95221.5	40890.9	14.1599	µm	Spot	Position	1	Class B	S100B+	618
95056.5	40949.5	13.5927	µm	Spot	Position	1	Class B	S100B+	620
95033.9	40971.8	14.15	µm	Spot	Position	1	Class B	S100B+	622
95104.4	40929	13.7634	µm	Spot	Position	1	Class B	S100B+	623
95128.4	40944.9	14.1761	µm	Spot	Position	1	Class B	S100B+	624
95029.8	40979.4	13.7045	µm	Spot	Position	1	Class B	S100B+	629
95047.7	40977.2	14.1971	µm	Spot	Position	1	Class B	S100B+	630
95048.3	40981.8	14.2837	µm	Spot	Position	1	Class B	S100B+	631
95032.9	40995.1	14.3175	µm	Spot	Position	1	Class B	S100B+	632
95334.6	39487.8	14.9316	µm	Spot	Position	1	Class B	S100B+	717
95293.3	39453.8	15.5491	µm	Spot	Position	1	Class B	S100B+	718
95330.7	39486.1	15.4328	µm	Spot	Position	1	Class B	S100B+	719
95287.2	39511.1	15.5274	µm	Spot	Position	1	Class B	S100B+	743
95286.5	39529.5	15.4613	µm	Spot	Position	1	Class B	S100B+	744
95294.5	39517.6	14.8291	µm	Spot	Position	1	Class B	S100B+	745
95301.6	39497.7	15.308	µm	Spot	Position	1	Class B	S100B+	747
95316.4	39504.4	15.3049	µm	Spot	Position	1	Class B	S100B+	748
95293.5	39519.4	15.3897	µm	Spot	Position	1	Class B	S100B+	750
95302.7	39527.5	15.6003	µm	Spot	Position	1	Class B	S100B+	751
95302.5	39540	15.3539	µm	Spot	Position	1	Class B	S100B+	752
95284	39582.3	15.4915	µm	Spot	Position	1	Class B	S100B+	791
95316.8	39551.9	14.4642	µm	Spot	Position	1	Class B	S100B+	794
95304.1	39578.9	14.6772	µm	Spot	Position	1	Class B	S100B+	796
95297.2	39580	14.5268	µm	Spot	Position	1	Class B	S100B+	797
95305.5	39582.2	14.9514	µm	Spot	Position	1	Class B	S100B+	798
95316.5	39544.6	15.1246	µm	Spot	Position	1	Class B	S100B+	799
95313.8	39550.9	15.0495	µm	Spot	Position	1	Class B	S100B+	801
95302.3	39574.8	15.3017	µm	Spot	Position	1	Class B	S100B+	806
95305.3	39579.6	15.0405	µm	Spot	Position	1	Class B	S100B+	807
95308.3	39558	15.3321	µm	Spot	Position	1	Class B	S100B+	809
95310	39559.1	15.5167	µm	Spot	Position	1	Class B	S100B+	810
95295.6	39615.1	14.7542	µm	Spot	Position	1	Class B	S100B+	842
95292.6	39590.7	15.1606	µm	Spot	Position	1	Class B	S100B+	844
95296	39600.6	15.1994	µm	Spot	Position	1	Class B	S100B+	845
95304.3	39631.4	15.0908	µm	Spot	Position	1	Class B	S100B+	846
95298.7	39606.5	15.5015	µm	Spot	Position	1	Class B	S100B+	848
95302.5	39648.8	14.6045	µm	Spot	Position	1	Class B	S100B+	894
95311.7	39661.6	14.414	µm	Spot	Position	1	Class B	S100B+	895
95304.3	39638.3	14.7995	µm	Spot	Position	1	Class B	S100B+	896
95311.9	39647.4	14.7919	µm	Spot	Position	1	Class B	S100B+	897
95295.3	39651.4	15.1131	µm	Spot	Position	1	Class B	S100B+	898
95296.6	39657.5	15.2667	µm	Spot	Position	1	Class B	S100B+	899
95306.1	39639.9	15.5192	µm	Spot	Position	1	Class B	S100B+	901
95312.3	39725.8	14.6377	µm	Spot	Position	1	Class B	S100B+	948
95309	39695.3	15.5245	µm	Spot	Position	1	Class B	S100B+	951
95310.5	39744	14.599	µm	Spot	Position	1	Class B	S100B+	1014
95319.9	39746.1	14.606	µm	Spot	Position	1	Class B	S100B+	1015
95326.5	39759.6	14.4622	µm	Spot	Position	1	Class B	S100B+	1016
95322	39760.1	14.6797	µm	Spot	Position	1	Class B	S100B+	1017
95317.5	39734.7	14.7789	µm	Spot	Position	1	Class B	S100B+	1018
95322.5	39743.8	14.8951	µm	Spot	Position	1	Class B	S100B+	1020
95316.7	39728.5	15.2182	µm	Spot	Position	1	Class B	S100B+	1021
95322.1	39748.2	15.5331	µm	Spot	Position	1	Class B	S100B+	1025
95320.8	39777.4	14.8594	µm	Spot	Position	1	Class B	S100B+	1108
95329	39787.6	14.9603	µm	Spot	Position	1	Class B	S100B+	1109
95331	39807.5	15.1359	µm	Spot	Position	1	Class B	S100B+	1114
95333.7	39848.4	14.7582	µm	Spot	Position	1	Class B	S100B+	1175
95334.9	39827.7	15.3615	µm	Spot	Position	1	Class B	S100B+	1181
95335.4	39849.6	15.3194	µm	Spot	Position	1	Class B	S100B+	1183
95341.8	39852.7	15.3667	µm	Spot	Position	1	Class B	S100B+	1193
95342.3	39881	14.4158	µm	Spot	Position	1	Class B	S100B+	1261
95351.7	39909.7	14.7683	µm	Spot	Position	1	Class B	S100B+	1264
95349	39893.4	15.2168	µm	Spot	Position	1	Class B	S100B+	1265
95340.8	39889.6	15.4058	µm	Spot	Position	1	Class B	S100B+	1266
95350.8	39911.5	15.3373	µm	Spot	Position	1	Class B	S100B+	1267
95366.4	39934.6	14.5621	µm	Spot	Position	1	Class B	S100B+	1316
95361.1	39935	14.4124	µm	Spot	Position	1	Class B	S100B+	1317
95363.7	39936	14.8154	µm	Spot	Position	1	Class B	S100B+	1319
95356.5	39925.1	15.5668	µm	Spot	Position	1	Class B	S100B+	1324
95370	39947.8	15.5221	µm	Spot	Position	1	Class B	S100B+	1325
95377.5	39957.4	15.3114	µm	Spot	Position	1	Class B	S100B+	1326
95380.5	39976.5	14.6229	µm	Spot	Position	1	Class B	S100B+	1396
95380.6	39983.8	15.2679	µm	Spot	Position	1	Class B	S100B+	1400
95376.4	40008.3	14.6716	µm	Spot	Position	1	Class B	S100B+	1443
95397.2	40019.1	15.4709	µm	Spot	Position	1	Class B	S100B+	1451
95418.1	40111.5	15.1453	µm	Spot	Position	1	Class B	S100B+	1481
95424.9	40122.6	15.5875	µm	Spot	Position	1	Class B	S100B+	1483
95423.3	40123.1	15.3949	µm	Spot	Position	1	Class B	S100B+	1484
95414.8	40145	14.4408	µm	Spot	Position	1	Class B	S100B+	1503
95420.7	40145.2	14.5687	µm	Spot	Position	1	Class B	S100B+	1504
95427.4	40181.8	15.2796	µm	Spot	Position	1	Class B	S100B+	1505
95425.7	40161.1	15.357	µm	Spot	Position	1	Class B	S100B+	1506
95431.7	40156.7	14.4765	µm	Spot	Position	1	Class B	S100B+	1508
95432	40168.1	15.4313	µm	Spot	Position	1	Class B	S100B+	1516
95441.1	40182.2	15.4149	µm	Spot	Position	1	Class B	S100B+	1517
95448.8	40221.1	14.4343	µm	Spot	Position	1	Class B	S100B+	1535
95446.5	40228.7	14.5148	µm	Spot	Position	1	Class B	S100B+	1536
95446.1	40226.1	15.1736	µm	Spot	Position	1	Class B	S100B+	1543
95438	40201.3	15.4248	µm	Spot	Position	1	Class B	S100B+	1545
95453.5	40270.9	14.7971	µm	Spot	Position	1	Class B	S100B+	1553
95466.4	40275.5	14.8589	µm	Spot	Position	1	Class B	S100B+	1554
95471.2	40282.3	14.9682	µm	Spot	Position	1	Class B	S100B+	1555
95453.7	40258.1	15.1476	µm	Spot	Position	1	Class B	S100B+	1557
95456.2	40264	15.1352	µm	Spot	Position	1	Class B	S100B+	1558
95457.5	40267.5	15.2391	µm	Spot	Position	1	Class B	S100B+	1559
95448.5	40261.9	15.5991	µm	Spot	Position	1	Class B	S100B+	1562
95455	40264	15.4661	µm	Spot	Position	1	Class B	S100B+	1563
95468.5	40318.8	14.6402	µm	Spot	Position	1	Class B	S100B+	1577
95468.2	40327.8	14.4515	µm	Spot	Position	1	Class B	S100B+	1578
95466.6	40285.5	15.154	µm	Spot	Position	1	Class B	S100B+	1579
95471.6	40315.8	15.1196	µm	Spot	Position	1	Class B	S100B+	1580
95468.2	40316.5	15.4612	µm	Spot	Position	1	Class B	S100B+	1582
95464.1	40320.8	15.5931	µm	Spot	Position	1	Class B	S100B+	1583
95470.6	40344.2	15.3056	µm	Spot	Position	1	Class B	S100B+	1586
95473.9	40356.1	15.2764	µm	Spot	Position	1	Class B	S100B+	1587
95473.5	40359.1	15.2862	µm	Spot	Position	1	Class B	S100B+	1588
95470.8	40341.6	15.5475	µm	Spot	Position	1	Class B	S100B+	1590
95473.8	40350.1	15.4803	µm	Spot	Position	1	Class B	S100B+	1591
95478.1	40356	14.9934	µm	Spot	Position	1	Class B	S100B+	1593
95489.7	40367.3	15.2367	µm	Spot	Position	1	Class B	S100B+	1594
95478.8	40343.3	15.4606	µm	Spot	Position	1	Class B	S100B+	1596
95486.4	40364.4	15.3765	µm	Spot	Position	1	Class B	S100B+	1597
95492.8	40366.1	15.462	µm	Spot	Position	1	Class B	S100B+	1598
95475	40397.3	14.8499	µm	Spot	Position	1	Class B	S100B+	1604
95480.5	40377.2	15.3399	µm	Spot	Position	1	Class B	S100B+	1609
95495	40384.5	15.4484	µm	Spot	Position	1	Class B	S100B+	1610
95506.6	40403.7	15.5568	µm	Spot	Position	1	Class B	S100B+	1611
95521.8	40417.5	15.3861	µm	Spot	Position	1	Class B	S100B+	1612
95484.5	40440.7	14.4581	µm	Spot	Position	1	Class B	S100B+	1627
95500.4	40448.9	14.4956	µm	Spot	Position	1	Class B	S100B+	1628
95520.5	40431.8	14.8156	µm	Spot	Position	1	Class B	S100B+	1629
95498.7	40450.6	14.9267	µm	Spot	Position	1	Class B	S100B+	1630
95494.4	40452.1	14.7354	µm	Spot	Position	1	Class B	S100B+	1631
95483.9	40432.3	15.1182	µm	Spot	Position	1	Class B	S100B+	1632
95497.4	40433.1	15.2053	µm	Spot	Position	1	Class B	S100B+	1633
95520.5	40434.7	15.2272	µm	Spot	Position	1	Class B	S100B+	1634
95508.8	40437.4	15.0793	µm	Spot	Position	1	Class B	S100B+	1635
95519.3	40423.1	15.3747	µm	Spot	Position	1	Class B	S100B+	1636
95485.3	40447.3	15.3849	µm	Spot	Position	1	Class B	S100B+	1638
95485.3	40457.7	15.4694	µm	Spot	Position	1	Class B	S100B+	1639
95523.3	40456.9	14.9414	µm	Spot	Position	1	Class B	S100B+	1641
95523.3	40430.3	15.4166	µm	Spot	Position	1	Class B	S100B+	1642
95523.1	40432.2	15.5555	µm	Spot	Position	1	Class B	S100B+	1643
95522	40437.2	15.6047	µm	Spot	Position	1	Class B	S100B+	1644
95475.6	40512.9	14.9318	µm	Spot	Position	1	Class B	S100B+	1657
95502.8	40496.1	14.6297	µm	Spot	Position	1	Class B	S100B+	1659
95499.4	40512.4	14.6418	µm	Spot	Position	1	Class B	S100B+	1660
95505.6	40512.4	14.6242	µm	Spot	Position	1	Class B	S100B+	1661
95494.4	40496.1	14.8082	µm	Spot	Position	1	Class B	S100B+	1663
95506.8	40496.4	14.8264	µm	Spot	Position	1	Class B	S100B+	1664
95502.3	40504.9	14.83	µm	Spot	Position	1	Class B	S100B+	1665
95495.8	40507.6	14.7435	µm	Spot	Position	1	Class B	S100B+	1666
95504.6	40492.6	15.1403	µm	Spot	Position	1	Class B	S100B+	1667
95502.6	40495.3	15.156	µm	Spot	Position	1	Class B	S100B+	1668
95501.6	40496.3	15.2316	µm	Spot	Position	1	Class B	S100B+	1669
95515.7	40498.2	15.0668	µm	Spot	Position	1	Class B	S100B+	1670
95520.7	40507.6	15.2475	µm	Spot	Position	1	Class B	S100B+	1671
95518.3	40511.7	15.1486	µm	Spot	Position	1	Class B	S100B+	1672
95504.5	40512.1	15.1328	µm	Spot	Position	1	Class B	S100B+	1673
95501	40483.4	15.3838	µm	Spot	Position	1	Class B	S100B+	1674
95498.4	40496.9	15.4075	µm	Spot	Position	1	Class B	S100B+	1675
95505.1	40501.1	15.4912	µm	Spot	Position	1	Class B	S100B+	1676
95525	40478.4	14.5017	µm	Spot	Position	1	Class B	S100B+	1677
95524.3	40499.3	14.5586	µm	Spot	Position	1	Class B	S100B+	1679
95531.5	40499.7	14.5862	µm	Spot	Position	1	Class B	S100B+	1680
95526.5	40473.8	14.7613	µm	Spot	Position	1	Class B	S100B+	1681
95528.8	40502.1	14.7447	µm	Spot	Position	1	Class B	S100B+	1682
95523	40508.9	14.7794	µm	Spot	Position	1	Class B	S100B+	1684
95529.2	40476.5	15.0482	µm	Spot	Position	1	Class B	S100B+	1686
95530	40477	15.1937	µm	Spot	Position	1	Class B	S100B+	1687
95526.2	40480	15.2316	µm	Spot	Position	1	Class B	S100B+	1688
95525.9	40496.8	15.1427	µm	Spot	Position	1	Class B	S100B+	1691
95524.9	40506.2	15.1862	µm	Spot	Position	1	Class B	S100B+	1694
95525	40472.1	15.3384	µm	Spot	Position	1	Class B	S100B+	1695
95534.9	40488	15.5474	µm	Spot	Position	1	Class B	S100B+	1696
95532.7	40491	15.5389	µm	Spot	Position	1	Class B	S100B+	1697
95534	40501.2	15.3163	µm	Spot	Position	1	Class B	S100B+	1700
95469.2	40527.3	14.8215	µm	Spot	Position	1	Class B	S100B+	1730
95466.6	40546.6	14.7969	µm	Spot	Position	1	Class B	S100B+	1731
95472.1	40518	15.308	µm	Spot	Position	1	Class B	S100B+	1733
95466	40527.2	15.1171	µm	Spot	Position	1	Class B	S100B+	1734
95454.6	40545.2	15.2237	µm	Spot	Position	1	Class B	S100B+	1736
95447.2	40545.6	15.4227	µm	Spot	Position	1	Class B	S100B+	1739
95457.3	40551.9	15.5719	µm	Spot	Position	1	Class B	S100B+	1742
95485.7	40521.7	14.4995	µm	Spot	Position	1	Class B	S100B+	1744
95484.7	40545.1	14.6296	µm	Spot	Position	1	Class B	S100B+	1745
95479.7	40546.4	14.4431	µm	Spot	Position	1	Class B	S100B+	1746
95484.3	40549.4	14.4745	µm	Spot	Position	1	Class B	S100B+	1747
95486	40554.8	14.6179	µm	Spot	Position	1	Class B	S100B+	1750
95492.5	40536	14.9964	µm	Spot	Position	1	Class B	S100B+	1751
95486.2	40546.1	14.9166	µm	Spot	Position	1	Class B	S100B+	1752
95484.9	40550.5	14.7795	µm	Spot	Position	1	Class B	S100B+	1753
95516	40556.1	14.985	µm	Spot	Position	1	Class B	S100B+	1755
95521.5	40514	15.237	µm	Spot	Position	1	Class B	S100B+	1756
95491.7	40519.7	15.2443	µm	Spot	Position	1	Class B	S100B+	1757
95488.3	40530.2	15.0514	µm	Spot	Position	1	Class B	S100B+	1758
95484.4	40534.9	15.1153	µm	Spot	Position	1	Class B	S100B+	1759
95497.1	40535.3	15.0672	µm	Spot	Position	1	Class B	S100B+	1760
95498.5	40530.5	15.4189	µm	Spot	Position	1	Class B	S100B+	1761
95520.6	40537.4	15.4004	µm	Spot	Position	1	Class B	S100B+	1762
95489.7	40541	15.6007	µm	Spot	Position	1	Class B	S100B+	1763
95519.2	40542.5	15.3545	µm	Spot	Position	1	Class B	S100B+	1764
95476.6	40543.6	15.4436	µm	Spot	Position	1	Class B	S100B+	1765
95514.9	40554.8	15.385	µm	Spot	Position	1	Class B	S100B+	1766
95484.2	40556.6	15.5882	µm	Spot	Position	1	Class B	S100B+	1767
95529	40536	14.999	µm	Spot	Position	1	Class B	S100B+	1769
95524.4	40536.7	14.9047	µm	Spot	Position	1	Class B	S100B+	1770
95531.7	40543.2	15.2823	µm	Spot	Position	1	Class B	S100B+	1772
95522.1	40547.3	15.2754	µm	Spot	Position	1	Class B	S100B+	1773
95527.4	40522.1	15.6069	µm	Spot	Position	1	Class B	S100B+	1775
95530.7	40523.6	15.5863	µm	Spot	Position	1	Class B	S100B+	1776
95528.7	40545.9	15.3243	µm	Spot	Position	1	Class B	S100B+	1778
95471.6	40570.6	14.6202	µm	Spot	Position	1	Class B	S100B+	1787
95453.1	40590.9	14.6417	µm	Spot	Position	1	Class B	S100B+	1788
95474.9	40591.5	14.4247	µm	Spot	Position	1	Class B	S100B+	1789
95455.2	40593.3	14.5803	µm	Spot	Position	1	Class B	S100B+	1790
95468.8	40564.3	14.8006	µm	Spot	Position	1	Class B	S100B+	1791
95442.8	40581.1	14.9478	µm	Spot	Position	1	Class B	S100B+	1792
95455.5	40581.8	14.9893	µm	Spot	Position	1	Class B	S100B+	1793
95441.8	40582	14.8999	µm	Spot	Position	1	Class B	S100B+	1794
95470.9	40589.9	14.9374	µm	Spot	Position	1	Class B	S100B+	1796
95452.3	40603.8	14.7269	µm	Spot	Position	1	Class B	S100B+	1797
95454.6	40605.6	14.8611	µm	Spot	Position	1	Class B	S100B+	1798
95469.1	40560.7	15.016	µm	Spot	Position	1	Class B	S100B+	1799
95459.2	40570	15.2077	µm	Spot	Position	1	Class B	S100B+	1800
95459.3	40571	15.1826	µm	Spot	Position	1	Class B	S100B+	1801
95439.5	40578.6	15.2338	µm	Spot	Position	1	Class B	S100B+	1803
95454.4	40580.9	15.226	µm	Spot	Position	1	Class B	S100B+	1804
95459.8	40594.7	15.1724	µm	Spot	Position	1	Class B	S100B+	1805
95474.8	40596.1	15.1784	µm	Spot	Position	1	Class B	S100B+	1806
95438.4	40605.2	15.0948	µm	Spot	Position	1	Class B	S100B+	1807
95475.1	40559.9	15.463	µm	Spot	Position	1	Class B	S100B+	1808
95472.9	40563.1	15.3581	µm	Spot	Position	1	Class B	S100B+	1809
95468.4	40567.5	15.3738	µm	Spot	Position	1	Class B	S100B+	1810
95451	40585.5	15.3259	µm	Spot	Position	1	Class B	S100B+	1812
95483.2	40563.8	14.7082	µm	Spot	Position	1	Class B	S100B+	1813
95476.6	40566	14.4172	µm	Spot	Position	1	Class B	S100B+	1814
95486	40566.5	14.7044	µm	Spot	Position	1	Class B	S100B+	1815
95481.8	40578	14.5358	µm	Spot	Position	1	Class B	S100B+	1816
95486.8	40562.1	14.7999	µm	Spot	Position	1	Class B	S100B+	1817
95493.5	40567.7	14.7641	µm	Spot	Position	1	Class B	S100B+	1818
95504.5	40571.7	15.0067	µm	Spot	Position	1	Class B	S100B+	1819
95501.4	40576.1	15.0068	µm	Spot	Position	1	Class B	S100B+	1820
95480.5	40581.8	14.9139	µm	Spot	Position	1	Class B	S100B+	1821
95479.1	40559.8	15.1899	µm	Spot	Position	1	Class B	S100B+	1822
95491.8	40560.1	15.0679	µm	Spot	Position	1	Class B	S100B+	1823
95478.9	40563.8	15.1613	µm	Spot	Position	1	Class B	S100B+	1824
95492.4	40564.2	15.1791	µm	Spot	Position	1	Class B	S100B+	1825
95487.9	40567.4	15.1681	µm	Spot	Position	1	Class B	S100B+	1826
95504.9	40568.1	15.0204	µm	Spot	Position	1	Class B	S100B+	1828
95485.1	40560.9	15.3438	µm	Spot	Position	1	Class B	S100B+	1829
95479.5	40561.4	15.4065	µm	Spot	Position	1	Class B	S100B+	1830
95510.5	40566.4	15.5783	µm	Spot	Position	1	Class B	S100B+	1831
95483.7	40571	15.4982	µm	Spot	Position	1	Class B	S100B+	1833
95420	40638.2	14.4384	µm	Spot	Position	1	Class B	S100B+	1841
95427.6	40624.2	15.2905	µm	Spot	Position	1	Class B	S100B+	1849
95425.4	40627.9	15.3608	µm	Spot	Position	1	Class B	S100B+	1851
95424.3	40629.3	15.4563	µm	Spot	Position	1	Class B	S100B+	1852
95457.1	40606.1	14.4363	µm	Spot	Position	1	Class B	S100B+	1854
95457.9	40608.8	14.4437	µm	Spot	Position	1	Class B	S100B+	1857
95455.5	40614.2	14.5127	µm	Spot	Position	1	Class B	S100B+	1858
95456.7	40614.1	14.5497	µm	Spot	Position	1	Class B	S100B+	1859
95438.2	40616.7	14.7053	µm	Spot	Position	1	Class B	S100B+	1860
95459.9	40609.4	14.9205	µm	Spot	Position	1	Class B	S100B+	1861
95443.7	40610.7	14.9432	µm	Spot	Position	1	Class B	S100B+	1862
95450.9	40612	14.7744	µm	Spot	Position	1	Class B	S100B+	1863
95448.1	40613.4	14.8052	µm	Spot	Position	1	Class B	S100B+	1864
95454.4	40613.5	14.8382	µm	Spot	Position	1	Class B	S100B+	1865
95460.2	40614.1	14.8993	µm	Spot	Position	1	Class B	S100B+	1866
95459.8	40623	14.8428	µm	Spot	Position	1	Class B	S100B+	1867
95459.5	40627.4	14.9609	µm	Spot	Position	1	Class B	S100B+	1868
95464.2	40638.1	14.9199	µm	Spot	Position	1	Class B	S100B+	1869
95433.1	40614.3	15.2078	µm	Spot	Position	1	Class B	S100B+	1870
95454.3	40615.3	15.1934	µm	Spot	Position	1	Class B	S100B+	1871
95430.1	40617	15.105	µm	Spot	Position	1	Class B	S100B+	1872
95431.1	40621.4	15.2164	µm	Spot	Position	1	Class B	S100B+	1873
95454.7	40629.7	15.0818	µm	Spot	Position	1	Class B	S100B+	1874
95457.3	40610.2	15.4701	µm	Spot	Position	1	Class B	S100B+	1877
95442.2	40610.6	15.5924	µm	Spot	Position	1	Class B	S100B+	1878
95446	40611.9	15.3688	µm	Spot	Position	1	Class B	S100B+	1879
95451	40613.5	15.558	µm	Spot	Position	1	Class B	S100B+	1880
95447.3	40618	15.4264	µm	Spot	Position	1	Class B	S100B+	1881
95461.1	40618.1	15.3175	µm	Spot	Position	1	Class B	S100B+	1882
95458.2	40620.4	15.4365	µm	Spot	Position	1	Class B	S100B+	1883
95457.4	40631.7	15.4761	µm	Spot	Position	1	Class B	S100B+	1885
95444.2	40637.7	15.403	µm	Spot	Position	1	Class B	S100B+	1886
95440.6	40649.2	15.4212	µm	Spot	Position	1	Class B	S100B+	1887
95476.4	40613.2	15.1721	µm	Spot	Position	1	Class B	S100B+	1890
95478.5	40616	15.4314	µm	Spot	Position	1	Class B	S100B+	1891
95477.1	40617.3	15.5884	µm	Spot	Position	1	Class B	S100B+	1892
95480.9	40619.2	15.5902	µm	Spot	Position	1	Class B	S100B+	1893
95476.6	40622	15.5259	µm	Spot	Position	1	Class B	S100B+	1894
95425	40681.2	14.7401	µm	Spot	Position	1	Class B	S100B+	1906
95413.5	40654.6	15.0138	µm	Spot	Position	1	Class B	S100B+	1907
95410.3	40683	15.265	µm	Spot	Position	1	Class B	S100B+	1910
95413.6	40653.8	15.4409	µm	Spot	Position	1	Class B	S100B+	1914
95418.6	40667.6	15.3679	µm	Spot	Position	1	Class B	S100B+	1915
95399.7	40671.8	15.5736	µm	Spot	Position	1	Class B	S100B+	1916
95398.8	40674.9	15.4995	µm	Spot	Position	1	Class B	S100B+	1917
95424.7	40675.3	15.3902	µm	Spot	Position	1	Class B	S100B+	1918
95413.1	40682.1	15.5952	µm	Spot	Position	1	Class B	S100B+	1919
95379	40733.5	14.8659	µm	Spot	Position	1	Class B	S100B+	1935
95374.7	40716.2	15.1694	µm	Spot	Position	1	Class B	S100B+	1936
95363.8	40723.1	15.2435	µm	Spot	Position	1	Class B	S100B+	1938
95382.8	40726.8	15.2534	µm	Spot	Position	1	Class B	S100B+	1939
95381.2	40710.6	15.606	µm	Spot	Position	1	Class B	S100B+	1942
95374.2	40710.9	15.5305	µm	Spot	Position	1	Class B	S100B+	1943
95377.7	40729.9	15.4264	µm	Spot	Position	1	Class B	S100B+	1945
95394.5	40704	15.5545	µm	Spot	Position	1	Class B	S100B+	1958
95390.5	40705.4	15.5309	µm	Spot	Position	1	Class B	S100B+	1959
95326.3	40785.8	14.4919	µm	Spot	Position	1	Class B	S100B+	2004
95329.7	40786.1	14.5411	µm	Spot	Position	1	Class B	S100B+	2005
95324.6	40777.4	14.8331	µm	Spot	Position	1	Class B	S100B+	2006
95322.8	40785.8	15.2202	µm	Spot	Position	1	Class B	S100B+	2010
95344.4	40750.8	14.6711	µm	Spot	Position	1	Class B	S100B+	2012
95353.1	40761.6	14.845	µm	Spot	Position	1	Class B	S100B+	2013
95339.9	40757.6	15.0915	µm	Spot	Position	1	Class B	S100B+	2015
95345.7	40760.6	15.094	µm	Spot	Position	1	Class B	S100B+	2016
95338.7	40764.9	15.1802	µm	Spot	Position	1	Class B	S100B+	2017
95341	40766.3	15.1153	µm	Spot	Position	1	Class B	S100B+	2018
95288.1	40815.8	15.116	µm	Spot	Position	1	Class B	S100B+	2059
95297.7	40800.6	15.5447	µm	Spot	Position	1	Class B	S100B+	2061
95294.4	40806.9	15.3779	µm	Spot	Position	1	Class B	S100B+	2062
95181.5	40881.7	15.3725	µm	Spot	Position	1	Class B	S100B+	2099
95217.8	40878.3	14.6734	µm	Spot	Position	1	Class B	S100B+	2100
95237.5	40862.3	14.9233	µm	Spot	Position	1	Class B	S100B+	2107
95219.1	40871.8	14.937	µm	Spot	Position	1	Class B	S100B+	2110
95228.4	40875.8	14.7927	µm	Spot	Position	1	Class B	S100B+	2113
95218.1	40879.6	14.83	µm	Spot	Position	1	Class B	S100B+	2116
95216.8	40882.7	14.7213	µm	Spot	Position	1	Class B	S100B+	2117
95215.6	40874.2	15.0548	µm	Spot	Position	1	Class B	S100B+	2121
95217.8	40875.2	15.2271	µm	Spot	Position	1	Class B	S100B+	2122
95220.5	40880.6	15.1155	µm	Spot	Position	1	Class B	S100B+	2123
95220.9	40881.8	15.0397	µm	Spot	Position	1	Class B	S100B+	2124
95224.4	40880.2	15.3677	µm	Spot	Position	1	Class B	S100B+	2130
95257.9	40852.5	15.4856	µm	Spot	Position	1	Class B	S100B+	2139
95244.9	40853.2	15.5003	µm	Spot	Position	1	Class B	S100B+	2140
95113.4	40913	14.5437	µm	Spot	Position	1	Class B	S100B+	2157
95185.6	40893.9	14.7409	µm	Spot	Position	1	Class B	S100B+	2161
95184.8	40894.8	14.8717	µm	Spot	Position	1	Class B	S100B+	2162
95195.5	40904.5	14.9935	µm	Spot	Position	1	Class B	S100B+	2163
95171.9	40908.3	14.8017	µm	Spot	Position	1	Class B	S100B+	2164
95182.9	40925.5	14.8894	µm	Spot	Position	1	Class B	S100B+	2165
95192	40898.7	15.1145	µm	Spot	Position	1	Class B	S100B+	2166
95167	40900.6	15.2779	µm	Spot	Position	1	Class B	S100B+	2167
95198	40905.6	15.2325	µm	Spot	Position	1	Class B	S100B+	2168
95165.6	40907.4	15.056	µm	Spot	Position	1	Class B	S100B+	2169
95165.4	40926.7	15.1812	µm	Spot	Position	1	Class B	S100B+	2170
95172.1	40926.8	15.1608	µm	Spot	Position	1	Class B	S100B+	2171
95185.4	40886.5	15.402	µm	Spot	Position	1	Class B	S100B+	2172
95170.7	40889.5	15.329	µm	Spot	Position	1	Class B	S100B+	2173
95171.2	40914.4	15.356	µm	Spot	Position	1	Class B	S100B+	2175
95179.6	40916.9	15.4024	µm	Spot	Position	1	Class B	S100B+	2176
95177.2	40918.3	15.6016	µm	Spot	Position	1	Class B	S100B+	2177
95197.4	40924	15.3377	µm	Spot	Position	1	Class B	S100B+	2178
95229.6	40886.3	14.4877	µm	Spot	Position	1	Class B	S100B+	2179
95215	40887.7	14.6034	µm	Spot	Position	1	Class B	S100B+	2180
95220.6	40887.7	14.9109	µm	Spot	Position	1	Class B	S100B+	2182
95200.5	40900.1	14.8589	µm	Spot	Position	1	Class B	S100B+	2185
95208.4	40883.9	15.0831	µm	Spot	Position	1	Class B	S100B+	2187
95212.4	40884.2	15.1358	µm	Spot	Position	1	Class B	S100B+	2188
95215.9	40884.6	15.3636	µm	Spot	Position	1	Class B	S100B+	2191
95223.3	40884.7	15.4831	µm	Spot	Position	1	Class B	S100B+	2192
95219.6	40892.9	15.5286	µm	Spot	Position	1	Class B	S100B+	2193
95044.8	40971.6	14.5606	µm	Spot	Position	1	Class B	S100B+	2201
95046.6	40974.5	15.5662	µm	Spot	Position	1	Class B	S100B+	2202
95105.3	40946.1	14.5338	µm	Spot	Position	1	Class B	S100B+	2203
95102.3	40954.9	14.6153	µm	Spot	Position	1	Class B	S100B+	2204
95079.3	40958.4	14.6783	µm	Spot	Position	1	Class B	S100B+	2205
95079.9	40960.4	14.6265	µm	Spot	Position	1	Class B	S100B+	2206
95084.1	40952.3	14.7597	µm	Spot	Position	1	Class B	S100B+	2207
95074.9	40973.6	14.7804	µm	Spot	Position	1	Class B	S100B+	2208
95067.5	40942.5	15.1526	µm	Spot	Position	1	Class B	S100B+	2209
95088.7	40950.2	15.1776	µm	Spot	Position	1	Class B	S100B+	2210
95078.4	40952	15.2854	µm	Spot	Position	1	Class B	S100B+	2211
95084.7	40957.4	15.0895	µm	Spot	Position	1	Class B	S100B+	2212
95080.5	40968.5	15.2525	µm	Spot	Position	1	Class B	S100B+	2213
95090.3	40938.4	15.5891	µm	Spot	Position	1	Class B	S100B+	2215
95062.8	40940.3	15.3301	µm	Spot	Position	1	Class B	S100B+	2216
95112.8	40949.8	15.1504	µm	Spot	Position	1	Class B	S100B+	2219
95110.8	40953.2	15.1144	µm	Spot	Position	1	Class B	S100B+	2220
95114.1	40960.8	15.4801	µm	Spot	Position	1	Class B	S100B+	2222
95048.1	40983.7	14.8994	µm	Spot	Position	1	Class B	S100B+	2237
95041.5	40995.2	14.9445	µm	Spot	Position	1	Class B	S100B+	2238
95043.8	40977.9	15.1734	µm	Spot	Position	1	Class B	S100B+	2243
95065.6	40986.2	15.2926	µm	Spot	Position	1	Class B	S100B+	2247
95067.6	40976.9	15.6044	µm	Spot	Position	1	Class B	S100B+	2249
95280.9	39490.2	16.5901	µm	Spot	Position	1	Class B	S100B+	2385
95308.7	39466.6	15.7627	µm	Spot	Position	1	Class B	S100B+	2386
95302.3	39477.4	16.2067	µm	Spot	Position	1	Class B	S100B+	2388
95292.8	39469.2	16.706	µm	Spot	Position	1	Class B	S100B+	2390
95299.6	39493.8	16.6034	µm	Spot	Position	1	Class B	S100B+	2391
95289.5	39510.1	15.8347	µm	Spot	Position	1	Class B	S100B+	2431
95285.9	39540.4	15.6567	µm	Spot	Position	1	Class B	S100B+	2433
95275.7	39499.3	16.5284	µm	Spot	Position	1	Class B	S100B+	2437
95284.8	39538.5	16.6895	µm	Spot	Position	1	Class B	S100B+	2439
95293.4	39506.3	15.8012	µm	Spot	Position	1	Class B	S100B+	2440
95318	39521.6	15.887	µm	Spot	Position	1	Class B	S100B+	2441
95295.9	39528.7	15.6725	µm	Spot	Position	1	Class B	S100B+	2442
95317.6	39533.2	15.6705	µm	Spot	Position	1	Class B	S100B+	2443
95292.8	39539.7	16.0388	µm	Spot	Position	1	Class B	S100B+	2445
95308.8	39514.3	16.372	µm	Spot	Position	1	Class B	S100B+	2446
95290.6	39560.1	15.7526	µm	Spot	Position	1	Class B	S100B+	2497
95313.3	39556.3	15.8289	µm	Spot	Position	1	Class B	S100B+	2507
95311	39556.8	16.7729	µm	Spot	Position	1	Class B	S100B+	2511
95295.8	39599.7	15.8171	µm	Spot	Position	1	Class B	S100B+	2559
95301.1	39608.8	16.1091	µm	Spot	Position	1	Class B	S100B+	2562
95296.1	39607	16.5846	µm	Spot	Position	1	Class B	S100B+	2566
95311	39646.1	15.6115	µm	Spot	Position	1	Class B	S100B+	2615
95308.5	39641.6	16.4979	µm	Spot	Position	1	Class B	S100B+	2618
95310.1	39649	16.2229	µm	Spot	Position	1	Class B	S100B+	2621
95302.9	39657.5	16.4622	µm	Spot	Position	1	Class B	S100B+	2622
95304.1	39651.9	16.5355	µm	Spot	Position	1	Class B	S100B+	2623
95304.3	39657.9	16.5597	µm	Spot	Position	1	Class B	S100B+	2624
95320.2	39726	15.6517	µm	Spot	Position	1	Class B	S100B+	2689
95309.8	39697.8	16.0581	µm	Spot	Position	1	Class B	S100B+	2691
95303.6	39699.8	16.5325	µm	Spot	Position	1	Class B	S100B+	2697
95309.3	39733.5	15.7027	µm	Spot	Position	1	Class B	S100B+	2783
95310.7	39730.4	16.5046	µm	Spot	Position	1	Class B	S100B+	2790
95324.8	39744.6	16.4948	µm	Spot	Position	1	Class B	S100B+	2791
95307	39728.4	16.771	µm	Spot	Position	1	Class B	S100B+	2793
95322.9	39802.7	15.8673	µm	Spot	Position	1	Class B	S100B+	2906
95322.8	39809	15.7815	µm	Spot	Position	1	Class B	S100B+	2907
95320	39776.8	16.0419	µm	Spot	Position	1	Class B	S100B+	2908
95327.4	39787.6	15.9381	µm	Spot	Position	1	Class B	S100B+	2909
95320.6	39813.9	16.1959	µm	Spot	Position	1	Class B	S100B+	2910
95315.8	39778.7	16.4514	µm	Spot	Position	1	Class B	S100B+	2911
95329.2	39780.9	16.4343	µm	Spot	Position	1	Class B	S100B+	2912
95312.8	39785.5	16.4763	µm	Spot	Position	1	Class B	S100B+	2913
95316	39788.2	16.7857	µm	Spot	Position	1	Class B	S100B+	2916
95322.3	39800.4	16.6374	µm	Spot	Position	1	Class B	S100B+	2918
95319.1	39813.1	16.5226	µm	Spot	Position	1	Class B	S100B+	2920
95325.7	39834	15.8405	µm	Spot	Position	1	Class B	S100B+	3000
95330.7	39855.1	15.7848	µm	Spot	Position	1	Class B	S100B+	3002
95336	39852.9	16.142	µm	Spot	Position	1	Class B	S100B+	3004
95335.6	39835.4	16.4339	µm	Spot	Position	1	Class B	S100B+	3006
95330	39853.6	16.3017	µm	Spot	Position	1	Class B	S100B+	3007
95339.2	39839.1	16.2349	µm	Spot	Position	1	Class B	S100B+	3015
95337.6	39822.2	16.521	µm	Spot	Position	1	Class B	S100B+	3017
95340.7	39876.7	16.1236	µm	Spot	Position	1	Class B	S100B+	3104
95346.9	39904.7	16.1672	µm	Spot	Position	1	Class B	S100B+	3105
95341.1	39872.5	16.4342	µm	Spot	Position	1	Class B	S100B+	3106
95360.6	39929.3	15.8181	µm	Spot	Position	1	Class B	S100B+	3197
95359.2	39937.3	15.9948	µm	Spot	Position	1	Class B	S100B+	3201
95348.9	39914.4	16.7302	µm	Spot	Position	1	Class B	S100B+	3203
95378.7	39975.7	15.6108	µm	Spot	Position	1	Class B	S100B+	3292
95382.5	39978.6	15.9804	µm	Spot	Position	1	Class B	S100B+	3293
95378.8	39993.4	16.231	µm	Spot	Position	1	Class B	S100B+	3295
95381.8	39996.1	16.4328	µm	Spot	Position	1	Class B	S100B+	3296
95378.9	39968.5	16.5246	µm	Spot	Position	1	Class B	S100B+	3297
95388.8	40010.6	15.8281	µm	Spot	Position	1	Class B	S100B+	3375
95393.5	40042.7	16.6316	µm	Spot	Position	1	Class B	S100B+	3385
95398.3	40065.6	15.6589	µm	Spot	Position	1	Class B	S100B+	3449
95399.5	40066.8	15.8873	µm	Spot	Position	1	Class B	S100B+	3450
95394.7	40051.9	15.9438	µm	Spot	Position	1	Class B	S100B+	3453
95401.9	40065.1	16.0846	µm	Spot	Position	1	Class B	S100B+	3454
95408.9	40082.7	15.9417	µm	Spot	Position	1	Class B	S100B+	3456
95405.8	40086.8	16.1703	µm	Spot	Position	1	Class B	S100B+	3457
95423.3	40114.4	16.3469	µm	Spot	Position	1	Class B	S100B+	3545
95410.4	40097.8	16.7316	µm	Spot	Position	1	Class B	S100B+	3548
95414.3	40121.8	16.7898	µm	Spot	Position	1	Class B	S100B+	3550
95419.5	40149.7	16.0664	µm	Spot	Position	1	Class B	S100B+	3623
95423.7	40150.2	16.0842	µm	Spot	Position	1	Class B	S100B+	3624
95411.9	40145.3	16.3233	µm	Spot	Position	1	Class B	S100B+	3626
95428.3	40164	16.3671	µm	Spot	Position	1	Class B	S100B+	3627
95428.7	40153	16.5681	µm	Spot	Position	1	Class B	S100B+	3629
95418.5	40160.2	16.6091	µm	Spot	Position	1	Class B	S100B+	3632
95419.7	40166.5	16.7509	µm	Spot	Position	1	Class B	S100B+	3633
95437	40180.6	15.6565	µm	Spot	Position	1	Class B	S100B+	3637
95432.3	40149.2	16.4667	µm	Spot	Position	1	Class B	S100B+	3641
95444.2	40204.4	16.7204	µm	Spot	Position	1	Class B	S100B+	3698
95445.4	40212.8	16.7266	µm	Spot	Position	1	Class B	S100B+	3701
95453.5	40234.6	16.7706	µm	Spot	Position	1	Class B	S100B+	3702
95459.3	40259.2	15.754	µm	Spot	Position	1	Class B	S100B+	3753
95454.7	40250.7	15.9361	µm	Spot	Position	1	Class B	S100B+	3754
95452.9	40272.7	15.9484	µm	Spot	Position	1	Class B	S100B+	3756
95451.8	40253.4	16.2383	µm	Spot	Position	1	Class B	S100B+	3759
95448.3	40255.1	16.3515	µm	Spot	Position	1	Class B	S100B+	3760
95448.3	40258.4	16.3912	µm	Spot	Position	1	Class B	S100B+	3761
95459.3	40267.4	16.4469	µm	Spot	Position	1	Class B	S100B+	3762
95453.7	40275.5	16.4298	µm	Spot	Position	1	Class B	S100B+	3763
95461.8	40278.2	16.2782	µm	Spot	Position	1	Class B	S100B+	3764
95454.1	40243.9	16.6045	µm	Spot	Position	1	Class B	S100B+	3765
95445.9	40248.3	16.7849	µm	Spot	Position	1	Class B	S100B+	3767
95451.6	40276.1	16.5809	µm	Spot	Position	1	Class B	S100B+	3769
95468.3	40287.1	15.7924	µm	Spot	Position	1	Class B	S100B+	3841
95461.9	40304.2	15.704	µm	Spot	Position	1	Class B	S100B+	3842
95453.7	40294.2	16.1868	µm	Spot	Position	1	Class B	S100B+	3843
95469.2	40320.1	16.1893	µm	Spot	Position	1	Class B	S100B+	3844
95459.3	40301.6	16.3027	µm	Spot	Position	1	Class B	S100B+	3846
95468.4	40302.1	16.3744	µm	Spot	Position	1	Class B	S100B+	3847
95465.3	40323.1	16.2457	µm	Spot	Position	1	Class B	S100B+	3850
95466.5	40325.8	16.4135	µm	Spot	Position	1	Class B	S100B+	3851
95459.1	40327.2	16.3765	µm	Spot	Position	1	Class B	S100B+	3852
95472.6	40327.8	16.384	µm	Spot	Position	1	Class B	S100B+	3853
95448.5	40284.5	16.7461	µm	Spot	Position	1	Class B	S100B+	3854
95467.4	40308.4	16.6198	µm	Spot	Position	1	Class B	S100B+	3855
95468.4	40348.6	15.8157	µm	Spot	Position	1	Class B	S100B+	3906
95471.3	40351.3	15.7561	µm	Spot	Position	1	Class B	S100B+	3907
95466.9	40356.6	15.8465	µm	Spot	Position	1	Class B	S100B+	3908
95466.3	40335.1	16.1387	µm	Spot	Position	1	Class B	S100B+	3909
95472.3	40341	15.9617	µm	Spot	Position	1	Class B	S100B+	3910
95474.8	40341.5	16.0489	µm	Spot	Position	1	Class B	S100B+	3911
95470.9	40349.2	15.9886	µm	Spot	Position	1	Class B	S100B+	3912
95465.3	40355.9	16.1471	µm	Spot	Position	1	Class B	S100B+	3913
95471.2	40333.3	16.2528	µm	Spot	Position	1	Class B	S100B+	3915
95474.6	40335.1	16.4062	µm	Spot	Position	1	Class B	S100B+	3916
95469.7	40348.4	16.2804	µm	Spot	Position	1	Class B	S100B+	3917
95474.8	40360.9	16.4187	µm	Spot	Position	1	Class B	S100B+	3920
95481.7	40361.7	15.6687	µm	Spot	Position	1	Class B	S100B+	3923
95489.7	40370.2	15.6731	µm	Spot	Position	1	Class B	S100B+	3925
95487.5	40371.8	15.8585	µm	Spot	Position	1	Class B	S100B+	3926
95496.9	40374.1	15.7774	µm	Spot	Position	1	Class B	S100B+	3927
95494.3	40373.9	16.3339	µm	Spot	Position	1	Class B	S100B+	3933
95480.2	40338.2	16.6801	µm	Spot	Position	1	Class B	S100B+	3934
95475.7	40340.8	16.5564	µm	Spot	Position	1	Class B	S100B+	3935
95493.5	40380.5	15.6294	µm	Spot	Position	1	Class B	S100B+	4007
95497	40383.8	15.6134	µm	Spot	Position	1	Class B	S100B+	4008
95497.1	40387	15.8178	µm	Spot	Position	1	Class B	S100B+	4009
95480.5	40378.5	15.9708	µm	Spot	Position	1	Class B	S100B+	4011
95498.9	40395.4	16.3861	µm	Spot	Position	1	Class B	S100B+	4013
95505.4	40397.4	16.4313	µm	Spot	Position	1	Class B	S100B+	4014
95521.3	40413.8	16.3063	µm	Spot	Position	1	Class B	S100B+	4015
95498.6	40381.4	16.6608	µm	Spot	Position	1	Class B	S100B+	4017
95499.6	40389.1	16.5632	µm	Spot	Position	1	Class B	S100B+	4018
95497.2	40396.5	16.8021	µm	Spot	Position	1	Class B	S100B+	4019
95484.2	40438.1	15.802	µm	Spot	Position	1	Class B	S100B+	4120
95494.6	40444.2	15.8759	µm	Spot	Position	1	Class B	S100B+	4121
95484.5	40453.6	15.7504	µm	Spot	Position	1	Class B	S100B+	4122
95484.3	40457.1	15.7886	µm	Spot	Position	1	Class B	S100B+	4123
95485.3	40451.6	15.9483	µm	Spot	Position	1	Class B	S100B+	4126
95484.7	40456	16.0288	µm	Spot	Position	1	Class B	S100B+	4127
95503	40459.7	15.9913	µm	Spot	Position	1	Class B	S100B+	4129
95521.5	40435.3	16.3413	µm	Spot	Position	1	Class B	S100B+	4130
95508	40422.1	16.5799	µm	Spot	Position	1	Class B	S100B+	4132
95484.1	40428.1	16.7953	µm	Spot	Position	1	Class B	S100B+	4133
95488.4	40441	16.5766	µm	Spot	Position	1	Class B	S100B+	4135
95488.2	40453.8	16.6145	µm	Spot	Position	1	Class B	S100B+	4136
95519	40454.2	16.7601	µm	Spot	Position	1	Class B	S100B+	4137
95482.1	40461.5	16.7206	µm	Spot	Position	1	Class B	S100B+	4140
95522.2	40450	15.8214	µm	Spot	Position	1	Class B	S100B+	4142
95535.8	40464	15.7914	µm	Spot	Position	1	Class B	S100B+	4144
95525	40440.5	16.1925	µm	Spot	Position	1	Class B	S100B+	4146
95526.7	40457.1	16.1851	µm	Spot	Position	1	Class B	S100B+	4149
95532.6	40463.1	15.9718	µm	Spot	Position	1	Class B	S100B+	4151
95527.1	40464.4	16.1557	µm	Spot	Position	1	Class B	S100B+	4152
95523.5	40426.3	16.3417	µm	Spot	Position	1	Class B	S100B+	4153
95527.9	40436.7	16.2162	µm	Spot	Position	1	Class B	S100B+	4155
95527.3	40440.6	16.5902	µm	Spot	Position	1	Class B	S100B+	4159
95474.5	40505	15.7164	µm	Spot	Position	1	Class B	S100B+	4236
95474.1	40495.6	16.6646	µm	Spot	Position	1	Class B	S100B+	4250
95497.2	40468.8	15.7844	µm	Spot	Position	1	Class B	S100B+	4254
95501.2	40469.6	15.9062	µm	Spot	Position	1	Class B	S100B+	4255
95499.5	40469.8	15.805	µm	Spot	Position	1	Class B	S100B+	4256
95504	40484.7	15.772	µm	Spot	Position	1	Class B	S100B+	4257
95487.3	40488.6	15.881	µm	Spot	Position	1	Class B	S100B+	4258
95495.6	40492.2	15.688	µm	Spot	Position	1	Class B	S100B+	4259
95507.5	40495.3	15.7878	µm	Spot	Position	1	Class B	S100B+	4260
95493.5	40508.8	15.6997	µm	Spot	Position	1	Class B	S100B+	4261
95498.7	40473.4	16.1849	µm	Spot	Position	1	Class B	S100B+	4262
95500.3	40490.8	16.0657	µm	Spot	Position	1	Class B	S100B+	4264
95501.1	40496.7	16.0006	µm	Spot	Position	1	Class B	S100B+	4265
95500.8	40499.3	16.1507	µm	Spot	Position	1	Class B	S100B+	4266
95479.9	40475.3	16.2981	µm	Spot	Position	1	Class B	S100B+	4268
95483.9	40476.2	16.3306	µm	Spot	Position	1	Class B	S100B+	4269
95477.6	40490.9	16.3479	µm	Spot	Position	1	Class B	S100B+	4272
95509.7	40492.5	16.3671	µm	Spot	Position	1	Class B	S100B+	4273
95502.6	40500.8	16.2574	µm	Spot	Position	1	Class B	S100B+	4274
95499.7	40505.8	16.2611	µm	Spot	Position	1	Class B	S100B+	4275
95502.5	40468.4	16.7923	µm	Spot	Position	1	Class B	S100B+	4276
95497.1	40471.4	16.6342	µm	Spot	Position	1	Class B	S100B+	4277
95486.8	40473.8	16.6584	µm	Spot	Position	1	Class B	S100B+	4278
95483.2	40474.2	16.6917	µm	Spot	Position	1	Class B	S100B+	4279
95500.5	40477.6	16.6107	µm	Spot	Position	1	Class B	S100B+	4280
95497.6	40493.5	16.6717	µm	Spot	Position	1	Class B	S100B+	4283
95504.1	40502.9	16.6478	µm	Spot	Position	1	Class B	S100B+	4284
95514.1	40510.9	16.6192	µm	Spot	Position	1	Class B	S100B+	4285
95503	40512.9	16.7011	µm	Spot	Position	1	Class B	S100B+	4286
95525.6	40477.5	16.0674	µm	Spot	Position	1	Class B	S100B+	4293
95528.4	40504.3	15.9779	µm	Spot	Position	1	Class B	S100B+	4296
95527.1	40467.8	16.2352	µm	Spot	Position	1	Class B	S100B+	4297
95522.5	40476.6	16.3938	µm	Spot	Position	1	Class B	S100B+	4298
95528	40478	16.2226	µm	Spot	Position	1	Class B	S100B+	4299
95523.3	40479.5	16.4521	µm	Spot	Position	1	Class B	S100B+	4300
95534.4	40483.5	16.4641	µm	Spot	Position	1	Class B	S100B+	4301
95529.5	40498.1	16.2876	µm	Spot	Position	1	Class B	S100B+	4304
95532	40469.7	16.6826	µm	Spot	Position	1	Class B	S100B+	4306
95460.1	40549.2	15.7513	µm	Spot	Position	1	Class B	S100B+	4393
95459.3	40532.3	16.0085	µm	Spot	Position	1	Class B	S100B+	4398
95464.1	40540.7	16.0196	µm	Spot	Position	1	Class B	S100B+	4400
95459.3	40552.4	16.1571	µm	Spot	Position	1	Class B	S100B+	4401
95468.2	40559.1	16.0795	µm	Spot	Position	1	Class B	S100B+	4403
95467.1	40518.4	16.4215	µm	Spot	Position	1	Class B	S100B+	4405
95452.5	40549.9	16.4734	µm	Spot	Position	1	Class B	S100B+	4408
95471	40521.1	16.5297	µm	Spot	Position	1	Class B	S100B+	4410
95465.5	40534.8	16.5859	µm	Spot	Position	1	Class B	S100B+	4414
95510.3	40518.3	15.6263	µm	Spot	Position	1	Class B	S100B+	4420
95494.4	40524.6	15.8218	µm	Spot	Position	1	Class B	S100B+	4421
95492.7	40529.2	15.8432	µm	Spot	Position	1	Class B	S100B+	4422
95498	40547.9	15.7931	µm	Spot	Position	1	Class B	S100B+	4423
95477.2	40558.8	15.628	µm	Spot	Position	1	Class B	S100B+	4424
95490.3	40544	16.1257	µm	Spot	Position	1	Class B	S100B+	4425
95497.3	40549.1	16.1064	µm	Spot	Position	1	Class B	S100B+	4426
95513.9	40554.8	16.0391	µm	Spot	Position	1	Class B	S100B+	4427
95487.7	40555.4	16.0285	µm	Spot	Position	1	Class B	S100B+	4428
95491.7	40528.3	16.291	µm	Spot	Position	1	Class B	S100B+	4430
95487.8	40532	16.2436	µm	Spot	Position	1	Class B	S100B+	4431
95496.8	40547.9	16.408	µm	Spot	Position	1	Class B	S100B+	4432
95486.3	40553	16.2623	µm	Spot	Position	1	Class B	S100B+	4433
95480.8	40559	16.3036	µm	Spot	Position	1	Class B	S100B+	4435
95501.9	40513.4	16.5344	µm	Spot	Position	1	Class B	S100B+	4436
95487.2	40533.9	16.5136	µm	Spot	Position	1	Class B	S100B+	4437
95496.3	40539.7	16.5978	µm	Spot	Position	1	Class B	S100B+	4438
95489.5	40555.6	16.7027	µm	Spot	Position	1	Class B	S100B+	4439
95492.6	40556.2	16.5408	µm	Spot	Position	1	Class B	S100B+	4440
95524.1	40529.7	16.2544	µm	Spot	Position	1	Class B	S100B+	4446
95524.2	40533.6	16.2569	µm	Spot	Position	1	Class B	S100B+	4447
95524.9	40545.9	16.2966	µm	Spot	Position	1	Class B	S100B+	4449
95445	40581.6	15.7129	µm	Spot	Position	1	Class B	S100B+	4516
95443	40583.2	15.6764	µm	Spot	Position	1	Class B	S100B+	4517
95471.5	40586.3	15.7876	µm	Spot	Position	1	Class B	S100B+	4518
95465	40593.8	15.8383	µm	Spot	Position	1	Class B	S100B+	4519
95453.2	40599.6	15.8359	µm	Spot	Position	1	Class B	S100B+	4520
95431.5	40603.6	15.8983	µm	Spot	Position	1	Class B	S100B+	4521
95440.2	40580.3	16.0689	µm	Spot	Position	1	Class B	S100B+	4523
95451.4	40587	16.0944	µm	Spot	Position	1	Class B	S100B+	4525
95462.8	40593	15.9534	µm	Spot	Position	1	Class B	S100B+	4526
95452.1	40597.1	16.0733	µm	Spot	Position	1	Class B	S100B+	4527
95439.2	40599.9	16.1777	µm	Spot	Position	1	Class B	S100B+	4528
95456.4	40602.4	16.0765	µm	Spot	Position	1	Class B	S100B+	4529
95457.4	40571.3	16.503	µm	Spot	Position	1	Class B	S100B+	4530
95455.9	40577.9	16.4941	µm	Spot	Position	1	Class B	S100B+	4531
95453.1	40583.6	16.221	µm	Spot	Position	1	Class B	S100B+	4532
95472.6	40588.1	16.3409	µm	Spot	Position	1	Class B	S100B+	4533
95444.3	40589.1	16.4436	µm	Spot	Position	1	Class B	S100B+	4534
95455.2	40591.2	16.3766	µm	Spot	Position	1	Class B	S100B+	4535
95444.5	40596	16.4263	µm	Spot	Position	1	Class B	S100B+	4536
95441.9	40600.9	16.4206	µm	Spot	Position	1	Class B	S100B+	4537
95438.9	40601.9	16.3626	µm	Spot	Position	1	Class B	S100B+	4538
95443.1	40572.3	16.642	µm	Spot	Position	1	Class B	S100B+	4540
95466.2	40588.8	16.7482	µm	Spot	Position	1	Class B	S100B+	4541
95448.4	40589.8	16.6549	µm	Spot	Position	1	Class B	S100B+	4542
95474.9	40594	16.7119	µm	Spot	Position	1	Class B	S100B+	4543
95441.6	40598.2	16.5894	µm	Spot	Position	1	Class B	S100B+	4544
95511.7	40563.6	15.8901	µm	Spot	Position	1	Class B	S100B+	4545
95487.3	40568.7	15.7014	µm	Spot	Position	1	Class B	S100B+	4547
95493.8	40572.1	15.8119	µm	Spot	Position	1	Class B	S100B+	4548
95495.6	40581.4	15.764	µm	Spot	Position	1	Class B	S100B+	4549
95478.2	40583.2	15.873	µm	Spot	Position	1	Class B	S100B+	4550
95489.5	40599.1	15.7843	µm	Spot	Position	1	Class B	S100B+	4551
95515.9	40560.9	16.011	µm	Spot	Position	1	Class B	S100B+	4552
95511.1	40562.2	16.0837	µm	Spot	Position	1	Class B	S100B+	4553
95508.4	40565.4	16.3639	µm	Spot	Position	1	Class B	S100B+	4555
95483.3	40569	16.234	µm	Spot	Position	1	Class B	S100B+	4556
95502.1	40570.5	16.3821	µm	Spot	Position	1	Class B	S100B+	4557
95498.8	40574.7	16.3368	µm	Spot	Position	1	Class B	S100B+	4558
95476.1	40595.8	16.2357	µm	Spot	Position	1	Class B	S100B+	4561
95492.4	40602.6	16.2229	µm	Spot	Position	1	Class B	S100B+	4562
95498.7	40566.6	16.7586	µm	Spot	Position	1	Class B	S100B+	4564
95485.6	40568.3	16.5864	µm	Spot	Position	1	Class B	S100B+	4565
95500.8	40568.5	16.559	µm	Spot	Position	1	Class B	S100B+	4566
95495.9	40585.1	16.5517	µm	Spot	Position	1	Class B	S100B+	4568
95427.2	40625.8	16.1011	µm	Spot	Position	1	Class B	S100B+	4623
95415.8	40646.4	16.1887	µm	Spot	Position	1	Class B	S100B+	4624
95453.2	40609.2	15.7311	µm	Spot	Position	1	Class B	S100B+	4633
95435.4	40612.2	15.8889	µm	Spot	Position	1	Class B	S100B+	4634
95454.7	40612.3	15.6582	µm	Spot	Position	1	Class B	S100B+	4635
95437.3	40608.9	16.1528	µm	Spot	Position	1	Class B	S100B+	4638
95454.9	40626.3	15.9387	µm	Spot	Position	1	Class B	S100B+	4639
95462.9	40637.7	16.1126	µm	Spot	Position	1	Class B	S100B+	4640
95462	40640.7	15.9993	µm	Spot	Position	1	Class B	S100B+	4641
95433.1	40612.3	16.454	µm	Spot	Position	1	Class B	S100B+	4642
95431.1	40614.6	16.288	µm	Spot	Position	1	Class B	S100B+	4643
95438.4	40618.8	16.416	µm	Spot	Position	1	Class B	S100B+	4644
95453	40618.7	16.3957	µm	Spot	Position	1	Class B	S100B+	4645
95441.6	40619	16.4722	µm	Spot	Position	1	Class B	S100B+	4646
95451.6	40629.3	16.4066	µm	Spot	Position	1	Class B	S100B+	4647
95461.2	40634.2	16.3034	µm	Spot	Position	1	Class B	S100B+	4648
95436.9	40651.6	16.4631	µm	Spot	Position	1	Class B	S100B+	4650
95453.4	40624.2	16.751	µm	Spot	Position	1	Class B	S100B+	4651
95438.4	40628.2	16.7569	µm	Spot	Position	1	Class B	S100B+	4652
95450.7	40630	16.7078	µm	Spot	Position	1	Class B	S100B+	4653
95469.4	40638.2	16.7031	µm	Spot	Position	1	Class B	S100B+	4654
95484.7	40614.9	15.6476	µm	Spot	Position	1	Class B	S100B+	4655
95479	40632.4	15.8097	µm	Spot	Position	1	Class B	S100B+	4657
95479.7	40612	16.3589	µm	Spot	Position	1	Class B	S100B+	4658
95484.1	40628.6	16.4497	µm	Spot	Position	1	Class B	S100B+	4660
95477.4	40615.2	16.5594	µm	Spot	Position	1	Class B	S100B+	4662
95424.8	40663.2	15.7827	µm	Spot	Position	1	Class B	S100B+	4747
95414.7	40675.6	15.7562	µm	Spot	Position	1	Class B	S100B+	4748
95412.8	40676.4	15.7262	µm	Spot	Position	1	Class B	S100B+	4749
95410	40684.1	15.6919	µm	Spot	Position	1	Class B	S100B+	4750
95404.1	40670.3	16.1754	µm	Spot	Position	1	Class B	S100B+	4752
95427.9	40674.9	16.1448	µm	Spot	Position	1	Class B	S100B+	4753
95424.9	40679.6	16.1292	µm	Spot	Position	1	Class B	S100B+	4754
95413	40680.7	16.134	µm	Spot	Position	1	Class B	S100B+	4755
95409.6	40681.1	15.9512	µm	Spot	Position	1	Class B	S100B+	4756
95419	40681.6	15.9782	µm	Spot	Position	1	Class B	S100B+	4757
95411.7	40684.6	15.9295	µm	Spot	Position	1	Class B	S100B+	4760
95424.2	40687.3	16.1906	µm	Spot	Position	1	Class B	S100B+	4763
95391.9	40695.3	16.0416	µm	Spot	Position	1	Class B	S100B+	4764
95413.9	40658.6	16.3497	µm	Spot	Position	1	Class B	S100B+	4766
95416.5	40671.8	16.4118	µm	Spot	Position	1	Class B	S100B+	4769
95414.2	40678.7	16.3501	µm	Spot	Position	1	Class B	S100B+	4770
95405.7	40691.6	16.2488	µm	Spot	Position	1	Class B	S100B+	4773
95411.3	40655.7	16.6103	µm	Spot	Position	1	Class B	S100B+	4778
95417.3	40663.4	16.7337	µm	Spot	Position	1	Class B	S100B+	4780
95427.1	40672	16.7208	µm	Spot	Position	1	Class B	S100B+	4782
95405.7	40672.9	16.5998	µm	Spot	Position	1	Class B	S100B+	4783
95422.9	40686.5	16.7303	µm	Spot	Position	1	Class B	S100B+	4786
95410.5	40693.3	16.7238	µm	Spot	Position	1	Class B	S100B+	4790
95394.4	40695.7	16.8077	µm	Spot	Position	1	Class B	S100B+	4791
95457.5	40655.3	16.1699	µm	Spot	Position	1	Class B	S100B+	4792
95373.4	40727.4	15.812	µm	Spot	Position	1	Class B	S100B+	4954
95371.4	40718.8	16.1093	µm	Spot	Position	1	Class B	S100B+	4956
95379.3	40726.4	15.9669	µm	Spot	Position	1	Class B	S100B+	4958
95370.6	40738.6	16.1893	µm	Spot	Position	1	Class B	S100B+	4962
95373.3	40709.6	16.2688	µm	Spot	Position	1	Class B	S100B+	4966
95375.6	40718	16.4001	µm	Spot	Position	1	Class B	S100B+	4970
95371.6	40722.4	16.3567	µm	Spot	Position	1	Class B	S100B+	4972
95378.1	40722.7	16.4829	µm	Spot	Position	1	Class B	S100B+	4973
95376.5	40731.1	16.4283	µm	Spot	Position	1	Class B	S100B+	4974
95379	40735.4	16.3181	µm	Spot	Position	1	Class B	S100B+	4976
95364.6	40740.8	16.4893	µm	Spot	Position	1	Class B	S100B+	4978
95372.5	40717.1	16.5166	µm	Spot	Position	1	Class B	S100B+	4981
95397.9	40699.8	15.905	µm	Spot	Position	1	Class B	S100B+	4984
95385.8	40702.6	15.8776	µm	Spot	Position	1	Class B	S100B+	4985
95388.4	40705.2	15.8256	µm	Spot	Position	1	Class B	S100B+	4986
95391.3	40703.4	16.0795	µm	Spot	Position	1	Class B	S100B+	4987
95394.3	40699.6	16.2552	µm	Spot	Position	1	Class B	S100B+	4989
95408.4	40702.7	16.3583	µm	Spot	Position	1	Class B	S100B+	4990
95383.4	40707.9	16.2601	µm	Spot	Position	1	Class B	S100B+	4992
95387.4	40701.8	16.5308	µm	Spot	Position	1	Class B	S100B+	4996
95385.7	40721.6	16.6003	µm	Spot	Position	1	Class B	S100B+	4998
95330.1	40771.4	15.8037	µm	Spot	Position	1	Class B	S100B+	5141
95329.1	40772.8	15.7761	µm	Spot	Position	1	Class B	S100B+	5142
95316.5	40781.8	15.7642	µm	Spot	Position	1	Class B	S100B+	5144
95314.6	40782.6	15.6229	µm	Spot	Position	1	Class B	S100B+	5145
95329.7	40779.1	16.0386	µm	Spot	Position	1	Class B	S100B+	5149
95335.7	40775.5	16.5758	µm	Spot	Position	1	Class B	S100B+	5162
95328.2	40777.1	16.809	µm	Spot	Position	1	Class B	S100B+	5163
95308.3	40788.8	16.6847	µm	Spot	Position	1	Class B	S100B+	5165
95313.6	40789.7	16.5407	µm	Spot	Position	1	Class B	S100B+	5166
95339.8	40752.3	15.7922	µm	Spot	Position	1	Class B	S100B+	5167
95345.1	40752.4	15.6925	µm	Spot	Position	1	Class B	S100B+	5168
95347.3	40758.9	15.964	µm	Spot	Position	1	Class B	S100B+	5172
95355.3	40762.9	16.1245	µm	Spot	Position	1	Class B	S100B+	5173
95347.9	40760.3	16.3386	µm	Spot	Position	1	Class B	S100B+	5176
95348.2	40758	16.7247	µm	Spot	Position	1	Class B	S100B+	5178
95289.4	40805	16.0174	µm	Spot	Position	1	Class B	S100B+	5305
95266.7	40833.9	15.9678	µm	Spot	Position	1	Class B	S100B+	5311
95301.8	40793.6	16.3838	µm	Spot	Position	1	Class B	S100B+	5322
95310.5	40796.2	16.3957	µm	Spot	Position	1	Class B	S100B+	5323
95294.3	40797.9	16.7694	µm	Spot	Position	1	Class B	S100B+	5330
95242.4	40858.3	15.8906	µm	Spot	Position	1	Class B	S100B+	5448
95229.6	40873.9	15.6961	µm	Spot	Position	1	Class B	S100B+	5452
95234.5	40867	15.9902	µm	Spot	Position	1	Class B	S100B+	5459
95233.4	40865.9	16.3904	µm	Spot	Position	1	Class B	S100B+	5462
95223.9	40876.7	16.5009	µm	Spot	Position	1	Class B	S100B+	5467
95209.7	40881.1	16.3495	µm	Spot	Position	1	Class B	S100B+	5468
95226	40870.1	16.7809	µm	Spot	Position	1	Class B	S100B+	5477
95234.5	40873.4	16.6523	µm	Spot	Position	1	Class B	S100B+	5479
95247.6	40859.7	15.6862	µm	Spot	Position	1	Class B	S100B+	5483
95264.9	40837.9	16.4427	µm	Spot	Position	1	Class B	S100B+	5487
95261.3	40842.8	16.2644	µm	Spot	Position	1	Class B	S100B+	5489
95261.2	40838.5	16.7155	µm	Spot	Position	1	Class B	S100B+	5491
95101.4	40913.7	16.0932	µm	Spot	Position	1	Class B	S100B+	5558
95118.7	40906.2	15.706	µm	Spot	Position	1	Class B	S100B+	5563
95139.9	40910.3	15.696	µm	Spot	Position	1	Class B	S100B+	5564
95115.1	40905.8	16.1392	µm	Spot	Position	1	Class B	S100B+	5567
95110.5	40909.3	16.0544	µm	Spot	Position	1	Class B	S100B+	5568
95111.9	40910.3	16.1878	µm	Spot	Position	1	Class B	S100B+	5569
95128.5	40925.7	15.9386	µm	Spot	Position	1	Class B	S100B+	5570
95142.7	40925.9	15.9157	µm	Spot	Position	1	Class B	S100B+	5571
95131.4	40926.5	15.9688	µm	Spot	Position	1	Class B	S100B+	5572
95113.1	40928.3	16.1536	µm	Spot	Position	1	Class B	S100B+	5573
95149.7	40898.2	16.2476	µm	Spot	Position	1	Class B	S100B+	5574
95113.9	40910.1	16.4591	µm	Spot	Position	1	Class B	S100B+	5575
95131.2	40913.9	16.3904	µm	Spot	Position	1	Class B	S100B+	5576
95135.4	40924.9	16.681	µm	Spot	Position	1	Class B	S100B+	5578
95174.3	40893.5	15.839	µm	Spot	Position	1	Class B	S100B+	5579
95190.3	40900.4	15.8938	µm	Spot	Position	1	Class B	S100B+	5580
95197.8	40900.3	15.8057	µm	Spot	Position	1	Class B	S100B+	5581
95164.4	40911.7	15.7818	µm	Spot	Position	1	Class B	S100B+	5583
95188.1	40913.8	15.8486	µm	Spot	Position	1	Class B	S100B+	5584
95196.6	40915.3	15.6791	µm	Spot	Position	1	Class B	S100B+	5585
95164.6	40922	15.6205	µm	Spot	Position	1	Class B	S100B+	5586
95159.7	40927.2	15.8542	µm	Spot	Position	1	Class B	S100B+	5587
95164	40927.4	15.7624	µm	Spot	Position	1	Class B	S100B+	5588
95162.4	40888.6	16.0035	µm	Spot	Position	1	Class B	S100B+	5589
95195.3	40895.7	16.0541	µm	Spot	Position	1	Class B	S100B+	5590
95178.4	40903.7	16.1464	µm	Spot	Position	1	Class B	S100B+	5591
95166.1	40905.2	16.0139	µm	Spot	Position	1	Class B	S100B+	5592
95197.2	40913.3	16.1212	µm	Spot	Position	1	Class B	S100B+	5594
95158.2	40924	16.121	µm	Spot	Position	1	Class B	S100B+	5596
95184.4	40924.9	15.9472	µm	Spot	Position	1	Class B	S100B+	5597
95180.4	40926.2	16.1294	µm	Spot	Position	1	Class B	S100B+	5598
95174	40926.3	16.1767	µm	Spot	Position	1	Class B	S100B+	5599
95194.1	40892.6	16.5017	µm	Spot	Position	1	Class B	S100B+	5601
95195.7	40892.8	16.406	µm	Spot	Position	1	Class B	S100B+	5602
95192.2	40904.2	16.2266	µm	Spot	Position	1	Class B	S100B+	5603
95162.7	40910.4	16.2409	µm	Spot	Position	1	Class B	S100B+	5604
95186.2	40912.4	16.3017	µm	Spot	Position	1	Class B	S100B+	5605
95159.9	40924.9	16.3077	µm	Spot	Position	1	Class B	S100B+	5606
95192.2	40889.6	16.7525	µm	Spot	Position	1	Class B	S100B+	5607
95198.1	40894.4	16.6277	µm	Spot	Position	1	Class B	S100B+	5608
95174.7	40901.2	16.698	µm	Spot	Position	1	Class B	S100B+	5609
95188.8	40908.4	16.7352	µm	Spot	Position	1	Class B	S100B+	5610
95152.8	40914.7	16.7169	µm	Spot	Position	1	Class B	S100B+	5611
95175.3	40915.1	16.5725	µm	Spot	Position	1	Class B	S100B+	5612
95212.5	40885.7	15.7767	µm	Spot	Position	1	Class B	S100B+	5613
95200	40908.5	15.8732	µm	Spot	Position	1	Class B	S100B+	5617
95203.6	40913	15.7001	µm	Spot	Position	1	Class B	S100B+	5619
95203.4	40921.3	15.6143	µm	Spot	Position	1	Class B	S100B+	5620
95213	40886.1	16.0371	µm	Spot	Position	1	Class B	S100B+	5621
95222.6	40891.1	16.0928	µm	Spot	Position	1	Class B	S100B+	5622
95201.5	40912	15.996	µm	Spot	Position	1	Class B	S100B+	5623
95231.9	40890.2	16.2992	µm	Spot	Position	1	Class B	S100B+	5624
95205.6	40908.2	16.3374	µm	Spot	Position	1	Class B	S100B+	5626
95222.2	40888.3	16.7363	µm	Spot	Position	1	Class B	S100B+	5628
95044.9	40958.1	15.84	µm	Spot	Position	1	Class B	S100B+	5650
95039.8	40972.8	15.8003	µm	Spot	Position	1	Class B	S100B+	5652
95050.3	40973.7	15.6281	µm	Spot	Position	1	Class B	S100B+	5653
95049.8	40956.7	15.9566	µm	Spot	Position	1	Class B	S100B+	5655
95058.3	40964.7	15.9364	µm	Spot	Position	1	Class B	S100B+	5656
95057	40966	16.0655	µm	Spot	Position	1	Class B	S100B+	5657
95055.6	40948.8	16.3033	µm	Spot	Position	1	Class B	S100B+	5658
95074.3	40937.7	15.8537	µm	Spot	Position	1	Class B	S100B+	5659
95072.2	40938.8	15.7313	µm	Spot	Position	1	Class B	S100B+	5660
95073.5	40946	15.6742	µm	Spot	Position	1	Class B	S100B+	5661
95104.2	40947	15.8609	µm	Spot	Position	1	Class B	S100B+	5662
95082.5	40951.1	16.0019	µm	Spot	Position	1	Class B	S100B+	5663
95079.6	40933.5	16.4001	µm	Spot	Position	1	Class B	S100B+	5664
95087	40937.3	16.2466	µm	Spot	Position	1	Class B	S100B+	5665
95092.7	40944.2	16.3542	µm	Spot	Position	1	Class B	S100B+	5666
95083.3	40945.9	16.4279	µm	Spot	Position	1	Class B	S100B+	5667
95086.3	40960.1	16.3901	µm	Spot	Position	1	Class B	S100B+	5668
95084.3	40963.1	16.285	µm	Spot	Position	1	Class B	S100B+	5669
95086.7	40945	16.5524	µm	Spot	Position	1	Class B	S100B+	5670
95085.2	40947	16.7076	µm	Spot	Position	1	Class B	S100B+	5671
95087.2	40955.6	16.7534	µm	Spot	Position	1	Class B	S100B+	5672
95063.3	40967.9	16.5558	µm	Spot	Position	1	Class B	S100B+	5673
95130.4	40940.5	15.7082	µm	Spot	Position	1	Class B	S100B+	5674
95114	40956.8	15.8598	µm	Spot	Position	1	Class B	S100B+	5675
95117.6	40960.6	15.6763	µm	Spot	Position	1	Class B	S100B+	5676
95109.5	40945.6	16.1609	µm	Spot	Position	1	Class B	S100B+	5678
95115.1	40951.6	16.1531	µm	Spot	Position	1	Class B	S100B+	5680
95126	40960.9	16.1356	µm	Spot	Position	1	Class B	S100B+	5681
95143.3	40931.1	16.4054	µm	Spot	Position	1	Class B	S100B+	5683
95111.6	40948.4	16.4362	µm	Spot	Position	1	Class B	S100B+	5684
95117.8	40959.6	16.2429	µm	Spot	Position	1	Class B	S100B+	5686
95115.4	40930	16.6956	µm	Spot	Position	1	Class B	S100B+	5688
95131.7	40930.2	16.6089	µm	Spot	Position	1	Class B	S100B+	5689
95141.6	40931.2	16.7399	µm	Spot	Position	1	Class B	S100B+	5690
95127.7	40948.3	16.7355	µm	Spot	Position	1	Class B	S100B+	5693
95110.8	40950.2	16.634	µm	Spot	Position	1	Class B	S100B+	5694
95115.6	40950.9	16.7978	µm	Spot	Position	1	Class B	S100B+	5695
95130.4	40956.9	16.7154	µm	Spot	Position	1	Class B	S100B+	5697
95120.8	40961	16.6344	µm	Spot	Position	1	Class B	S100B+	5698
95033.6	40976.9	15.7668	µm	Spot	Position	1	Class B	S100B+	5757
95042.9	40981.3	15.6491	µm	Spot	Position	1	Class B	S100B+	5758
95031.8	40988.5	15.8271	µm	Spot	Position	1	Class B	S100B+	5759
95039.9	40993.9	15.9027	µm	Spot	Position	1	Class B	S100B+	5760
95038.3	40982.6	16.0208	µm	Spot	Position	1	Class B	S100B+	5763
95048.6	40976.2	16.377	µm	Spot	Position	1	Class B	S100B+	5766
95041.2	40980.6	16.2665	µm	Spot	Position	1	Class B	S100B+	5767
95029.7	40984	16.5007	µm	Spot	Position	1	Class B	S100B+	5768
95055.7	40990.3	16.4331	µm	Spot	Position	1	Class B	S100B+	5769
95030.3	40993	16.3796	µm	Spot	Position	1	Class B	S100B+	5770
95025	40983.5	16.5804	µm	Spot	Position	1	Class B	S100B+	5772
95029.6	40985.3	16.5489	µm	Spot	Position	1	Class B	S100B+	5773
95044.4	40985.8	16.6293	µm	Spot	Position	1	Class B	S100B+	5774
95034.3	40987.7	16.6825	µm	Spot	Position	1	Class B	S100B+	5775
95052.2	40993.9	16.726	µm	Spot	Position	1	Class B	S100B+	5778
95058.3	40996.4	16.5586	µm	Spot	Position	1	Class B	S100B+	5779
95060.5	40980.8	15.6819	µm	Spot	Position	1	Class B	S100B+	5782
95068.8	40986.3	15.8839	µm	Spot	Position	1	Class B	S100B+	5783
95071.1	40984.6	15.9864	µm	Spot	Position	1	Class B	S100B+	5784
95061.2	40987.6	16.1112	µm	Spot	Position	1	Class B	S100B+	5785
95076.7	40976.1	16.7803	µm	Spot	Position	1	Class B	S100B+	5787
95287.9	39454.9	17.0831	µm	Spot	Position	1	Class B	S100B+	5982
95290.5	39485.8	17.0344	µm	Spot	Position	1	Class B	S100B+	5983
95288.7	39481.9	17.2462	µm	Spot	Position	1	Class B	S100B+	5984
95288.1	39457.9	17.9553	µm	Spot	Position	1	Class B	S100B+	5986
95291.1	39487.6	17.3467	µm	Spot	Position	1	Class B	S100B+	5988
95283.2	39531.9	17.1838	µm	Spot	Position	1	Class B	S100B+	6050
95287.5	39533.5	17.2933	µm	Spot	Position	1	Class B	S100B+	6051
95287.2	39542.1	17.6138	µm	Spot	Position	1	Class B	S100B+	6052
95317.6	39530.2	17.0279	µm	Spot	Position	1	Class B	S100B+	6053
95315.7	39508.8	17.6892	µm	Spot	Position	1	Class B	S100B+	6054
95313.2	39518.5	17.8076	µm	Spot	Position	1	Class B	S100B+	6057
95288.3	39579	17.2402	µm	Spot	Position	1	Class B	S100B+	6119
95287.1	39582.4	17.2572	µm	Spot	Position	1	Class B	S100B+	6120
95287.7	39574.5	17.5773	µm	Spot	Position	1	Class B	S100B+	6122
95309.2	39572.8	16.8494	µm	Spot	Position	1	Class B	S100B+	6127
95301.9	39586.6	16.8679	µm	Spot	Position	1	Class B	S100B+	6129
95305	39554.1	17.3603	µm	Spot	Position	1	Class B	S100B+	6130
95307.6	39580.9	17.4003	µm	Spot	Position	1	Class B	S100B+	6131
95316.1	39553	17.4356	µm	Spot	Position	1	Class B	S100B+	6132
95310.7	39565.8	17.6749	µm	Spot	Position	1	Class B	S100B+	6133
95296.5	39573.5	17.5239	µm	Spot	Position	1	Class B	S100B+	6134
95295	39590	16.9613	µm	Spot	Position	1	Class B	S100B+	6199
95308.7	39623.6	17.3919	µm	Spot	Position	1	Class B	S100B+	6202
95310.1	39624.4	17.3032	µm	Spot	Position	1	Class B	S100B+	6203
95299.3	39591.5	17.5013	µm	Spot	Position	1	Class B	S100B+	6204
95292	39609.8	17.5269	µm	Spot	Position	1	Class B	S100B+	6206
95308.1	39612.1	17.9555	µm	Spot	Position	1	Class B	S100B+	6211
95311.5	39671.5	17.1503	µm	Spot	Position	1	Class B	S100B+	6284
95297.8	39668.3	17.5555	µm	Spot	Position	1	Class B	S100B+	6286
95311.8	39723.6	16.8375	µm	Spot	Position	1	Class B	S100B+	6372
95307.6	39690.9	17.2098	µm	Spot	Position	1	Class B	S100B+	6373
95313.3	39734.2	16.8921	µm	Spot	Position	1	Class B	S100B+	6473
95329.3	39753.4	17.0002	µm	Spot	Position	1	Class B	S100B+	6475
95314.9	39743.9	17.1631	µm	Spot	Position	1	Class B	S100B+	6480
95322.7	39730	17.4461	µm	Spot	Position	1	Class B	S100B+	6482
95328.3	39754	17.5359	µm	Spot	Position	1	Class B	S100B+	6484
95322.9	39775.3	17.0071	µm	Spot	Position	1	Class B	S100B+	6603
95333.5	39814.9	16.8493	µm	Spot	Position	1	Class B	S100B+	6606
95328	39795.9	17.1599	µm	Spot	Position	1	Class B	S100B+	6607
95333.2	39818.6	17.3801	µm	Spot	Position	1	Class B	S100B+	6609
95323.6	39799.9	17.881	µm	Spot	Position	1	Class B	S100B+	6613
95332.5	39812.2	17.9017	µm	Spot	Position	1	Class B	S100B+	6614
95336.4	39822.5	17.3669	µm	Spot	Position	1	Class B	S100B+	6696
95331.8	39855.5	17.4109	µm	Spot	Position	1	Class B	S100B+	6698
95340.5	39853.7	17.6206	µm	Spot	Position	1	Class B	S100B+	6710
95338.3	39848.9	17.7774	µm	Spot	Position	1	Class B	S100B+	6714
95340.4	39856	18.0091	µm	Spot	Position	1	Class B	S100B+	6715
95342.2	39869.5	16.9034	µm	Spot	Position	1	Class B	S100B+	6809
95353	39909	16.9578	µm	Spot	Position	1	Class B	S100B+	6811
95362.3	39937.8	16.8279	µm	Spot	Position	1	Class B	S100B+	6911
95358.2	39929.2	17.6502	µm	Spot	Position	1	Class B	S100B+	6916
95375.6	39952.7	17.6209	µm	Spot	Position	1	Class B	S100B+	6918
95362.9	39962.2	17.025	µm	Spot	Position	1	Class B	S100B+	7013
95361.2	39964.7	17.0226	µm	Spot	Position	1	Class B	S100B+	7014
95374	39972.5	17.064	µm	Spot	Position	1	Class B	S100B+	7015
95378.6	39984	17.339	µm	Spot	Position	1	Class B	S100B+	7019
95380.4	39960.5	17.6879	µm	Spot	Position	1	Class B	S100B+	7021
95361.2	39967.6	17.6036	µm	Spot	Position	1	Class B	S100B+	7022
95377.3	39984.7	17.4517	µm	Spot	Position	1	Class B	S100B+	7023
95381.3	39987	17.8949	µm	Spot	Position	1	Class B	S100B+	7027
95385.4	40002	16.8426	µm	Spot	Position	1	Class B	S100B+	7032
95375.7	40010.1	17.0945	µm	Spot	Position	1	Class B	S100B+	7123
95403.2	40031.5	17.3032	µm	Spot	Position	1	Class B	S100B+	7138
95392.6	40040.9	17.2491	µm	Spot	Position	1	Class B	S100B+	7140
95398.1	40021.7	17.8113	µm	Spot	Position	1	Class B	S100B+	7147
95402.2	40075.2	17.0294	µm	Spot	Position	1	Class B	S100B+	7255
95413.7	40097.5	17.0875	µm	Spot	Position	1	Class B	S100B+	7256
95406.9	40065.9	17.3045	µm	Spot	Position	1	Class B	S100B+	7258
95405	40067.3	17.5542	µm	Spot	Position	1	Class B	S100B+	7264
95405.5	40100.2	17.1024	µm	Spot	Position	1	Class B	S100B+	7360
95411.3	40143.7	17.5674	µm	Spot	Position	1	Class B	S100B+	7366
95428.6	40156.7	17.0587	µm	Spot	Position	1	Class B	S100B+	7477
95426.9	40185.5	16.9702	µm	Spot	Position	1	Class B	S100B+	7479
95427	40179.4	17.194	µm	Spot	Position	1	Class B	S100B+	7482
95425.4	40157.2	17.607	µm	Spot	Position	1	Class B	S100B+	7484
95429.6	40177.8	17.0072	µm	Spot	Position	1	Class B	S100B+	7488
95431.2	40149.3	17.3299	µm	Spot	Position	1	Class B	S100B+	7492
95436.6	40160.1	17.2108	µm	Spot	Position	1	Class B	S100B+	7493
95431.9	40155.9	17.5512	µm	Spot	Position	1	Class B	S100B+	7497
95433	40181.7	17.6082	µm	Spot	Position	1	Class B	S100B+	7504
95439.3	40186.1	17.9879	µm	Spot	Position	1	Class B	S100B+	7510
95444	40209.7	16.847	µm	Spot	Position	1	Class B	S100B+	7601
95445	40222.3	16.8626	µm	Spot	Position	1	Class B	S100B+	7604
95450.2	40235.9	16.8405	µm	Spot	Position	1	Class B	S100B+	7605
95439.6	40193.7	17.7408	µm	Spot	Position	1	Class B	S100B+	7618
95439	40209.3	17.9816	µm	Spot	Position	1	Class B	S100B+	7620
95441.5	40213.3	17.9462	µm	Spot	Position	1	Class B	S100B+	7623
95444.5	40232.4	17.9928	µm	Spot	Position	1	Class B	S100B+	7626
95460.1	40271.8	16.8881	µm	Spot	Position	1	Class B	S100B+	7730
95448.6	40237.9	17.1998	µm	Spot	Position	1	Class B	S100B+	7731
95449.2	40240.7	17.2144	µm	Spot	Position	1	Class B	S100B+	7732
95444.7	40244.2	17.1691	µm	Spot	Position	1	Class B	S100B+	7733
95446	40245.2	17.524	µm	Spot	Position	1	Class B	S100B+	7736
95449.5	40245.5	17.6225	µm	Spot	Position	1	Class B	S100B+	7737
95451.1	40271.3	17.4246	µm	Spot	Position	1	Class B	S100B+	7741
95448.7	40282	17.6866	µm	Spot	Position	1	Class B	S100B+	7743
95457.8	40311.3	17.0735	µm	Spot	Position	1	Class B	S100B+	7871
95466.1	40314.1	16.9807	µm	Spot	Position	1	Class B	S100B+	7872
95461.3	40327.2	16.9991	µm	Spot	Position	1	Class B	S100B+	7873
95453.6	40309.2	17.148	µm	Spot	Position	1	Class B	S100B+	7874
95452.9	40312.9	17.2758	µm	Spot	Position	1	Class B	S100B+	7875
95456.5	40297.8	17.594	µm	Spot	Position	1	Class B	S100B+	7878
95458	40305.2	17.5607	µm	Spot	Position	1	Class B	S100B+	7879
95448.3	40297.3	17.9719	µm	Spot	Position	1	Class B	S100B+	7883
95462.2	40303.2	17.9335	µm	Spot	Position	1	Class B	S100B+	7884
95463.2	40328.9	16.8535	µm	Spot	Position	1	Class B	S100B+	8016
95461.7	40331.9	16.964	µm	Spot	Position	1	Class B	S100B+	8017
95472.5	40341.5	16.9293	µm	Spot	Position	1	Class B	S100B+	8019
95471.8	40360	17.3258	µm	Spot	Position	1	Class B	S100B+	8024
95475.3	40363.2	17.2859	µm	Spot	Position	1	Class B	S100B+	8025
95458.9	40331.4	17.5833	µm	Spot	Position	1	Class B	S100B+	8026
95468.6	40335.2	17.5088	µm	Spot	Position	1	Class B	S100B+	8027
95467.8	40339.3	17.613	µm	Spot	Position	1	Class B	S100B+	8029
95462.2	40329.5	17.8079	µm	Spot	Position	1	Class B	S100B+	8031
95488	40361.8	17.0665	µm	Spot	Position	1	Class B	S100B+	8040
95475.9	40339.3	17.1615	µm	Spot	Position	1	Class B	S100B+	8045
95482.6	40343.3	17.1272	µm	Spot	Position	1	Class B	S100B+	8047
95477.6	40349.7	17.2649	µm	Spot	Position	1	Class B	S100B+	8049
95479.9	40364.5	17.2395	µm	Spot	Position	1	Class B	S100B+	8053
95491.1	40369.4	17.6589	µm	Spot	Position	1	Class B	S100B+	8061
95483.8	40351.2	17.9619	µm	Spot	Position	1	Class B	S100B+	8068
95478.4	40385.5	17.027	µm	Spot	Position	1	Class B	S100B+	8190
95480.2	40394.6	16.8716	µm	Spot	Position	1	Class B	S100B+	8191
95503.2	40394.8	16.9102	µm	Spot	Position	1	Class B	S100B+	8192
95514.9	40410.7	17.1019	µm	Spot	Position	1	Class B	S100B+	8193
95481.2	40375.8	17.3919	µm	Spot	Position	1	Class B	S100B+	8194
95476.6	40385.6	17.3538	µm	Spot	Position	1	Class B	S100B+	8195
95500.5	40393.5	17.3124	µm	Spot	Position	1	Class B	S100B+	8197
95483.2	40398.7	17.3827	µm	Spot	Position	1	Class B	S100B+	8198
95510.3	40402.3	17.2001	µm	Spot	Position	1	Class B	S100B+	8199
95485.1	40392.8	17.4967	µm	Spot	Position	1	Class B	S100B+	8201
95492.5	40395.5	17.6907	µm	Spot	Position	1	Class B	S100B+	8203
95481.6	40380.6	17.7743	µm	Spot	Position	1	Class B	S100B+	8204
95489.5	40397.6	17.9729	µm	Spot	Position	1	Class B	S100B+	8206
95476.8	40398.9	17.8781	µm	Spot	Position	1	Class B	S100B+	8207
95488.7	40409.5	17.8606	µm	Spot	Position	1	Class B	S100B+	8208
95488.5	40429.3	16.9957	µm	Spot	Position	1	Class B	S100B+	8354
95490.5	40431.7	16.892	µm	Spot	Position	1	Class B	S100B+	8355
95495.1	40464.9	17.0953	µm	Spot	Position	1	Class B	S100B+	8358
95484.2	40421.1	17.3316	µm	Spot	Position	1	Class B	S100B+	8359
95486.3	40431.7	17.221	µm	Spot	Position	1	Class B	S100B+	8361
95484.7	40446.6	17.2097	µm	Spot	Position	1	Class B	S100B+	8364
95492.4	40456.9	17.3342	µm	Spot	Position	1	Class B	S100B+	8367
95487.5	40433.6	17.4208	µm	Spot	Position	1	Class B	S100B+	8369
95521.8	40441.8	17.6903	µm	Spot	Position	1	Class B	S100B+	8370
95519.1	40432.2	17.7206	µm	Spot	Position	1	Class B	S100B+	8376
95484.4	40435.2	17.7822	µm	Spot	Position	1	Class B	S100B+	8377
95489.5	40452.4	17.8139	µm	Spot	Position	1	Class B	S100B+	8379
95528	40451.7	17.0804	µm	Spot	Position	1	Class B	S100B+	8383
95522.2	40444.2	17.905	µm	Spot	Position	1	Class B	S100B+	8397
95529.9	40456.3	17.8178	µm	Spot	Position	1	Class B	S100B+	8399
95483.7	40472.9	17.0726	µm	Spot	Position	1	Class B	S100B+	8536
95520.8	40475	17.0238	µm	Spot	Position	1	Class B	S100B+	8537
95499	40485.8	16.9913	µm	Spot	Position	1	Class B	S100B+	8542
95519.2	40505.7	17.0135	µm	Spot	Position	1	Class B	S100B+	8543
95493.1	40507.4	16.9509	µm	Spot	Position	1	Class B	S100B+	8544
95499.5	40476.5	17.3209	µm	Spot	Position	1	Class B	S100B+	8548
95508.6	40491	17.3876	µm	Spot	Position	1	Class B	S100B+	8551
95497.5	40491.6	17.1517	µm	Spot	Position	1	Class B	S100B+	8552
95506.9	40492.5	17.1237	µm	Spot	Position	1	Class B	S100B+	8553
95500.1	40495.7	17.2366	µm	Spot	Position	1	Class B	S100B+	8554
95505.2	40498.1	17.2432	µm	Spot	Position	1	Class B	S100B+	8555
95494.9	40499.2	17.1236	µm	Spot	Position	1	Class B	S100B+	8556
95498	40508.4	17.3294	µm	Spot	Position	1	Class B	S100B+	8557
95502.1	40473.9	17.4165	µm	Spot	Position	1	Class B	S100B+	8558
95510.9	40481.9	17.6866	µm	Spot	Position	1	Class B	S100B+	8561
95499.7	40486.5	17.5515	µm	Spot	Position	1	Class B	S100B+	8562
95483.9	40487.6	17.5876	µm	Spot	Position	1	Class B	S100B+	8563
95499.6	40507.9	17.6324	µm	Spot	Position	1	Class B	S100B+	8564
95488.5	40511	17.5667	µm	Spot	Position	1	Class B	S100B+	8565
95494.2	40476.5	17.7835	µm	Spot	Position	1	Class B	S100B+	8569
95477.7	40510.8	17.8489	µm	Spot	Position	1	Class B	S100B+	8571
95536.9	40492.3	16.8787	µm	Spot	Position	1	Class B	S100B+	8575
95525.4	40511.7	17.0998	µm	Spot	Position	1	Class B	S100B+	8578
95532.6	40472.8	17.2037	µm	Spot	Position	1	Class B	S100B+	8579
95532	40488.5	17.183	µm	Spot	Position	1	Class B	S100B+	8581
95529.5	40470.9	17.5746	µm	Spot	Position	1	Class B	S100B+	8584
95527.4	40509	17.5134	µm	Spot	Position	1	Class B	S100B+	8589
95522.4	40510.6	17.424	µm	Spot	Position	1	Class B	S100B+	8590
95535	40494.2	17.9219	µm	Spot	Position	1	Class B	S100B+	8594
95526.4	40496.1	17.8628	µm	Spot	Position	1	Class B	S100B+	8596
95528.8	40508	17.7195	µm	Spot	Position	1	Class B	S100B+	8597
95462	40547.8	16.8376	µm	Spot	Position	1	Class B	S100B+	8707
95452.4	40552.3	16.987	µm	Spot	Position	1	Class B	S100B+	8708
95449.4	40558.4	16.8633	µm	Spot	Position	1	Class B	S100B+	8709
95465.4	40519.8	17.3486	µm	Spot	Position	1	Class B	S100B+	8710
95462.5	40522.7	17.1949	µm	Spot	Position	1	Class B	S100B+	8711
95466.8	40525.2	17.5898	µm	Spot	Position	1	Class B	S100B+	8719
95462.3	40539.2	17.7756	µm	Spot	Position	1	Class B	S100B+	8726
95487.9	40516.9	16.9697	µm	Spot	Position	1	Class B	S100B+	8729
95509.3	40517.3	16.8533	µm	Spot	Position	1	Class B	S100B+	8730
95491.5	40542.4	16.8431	µm	Spot	Position	1	Class B	S100B+	8731
95482.1	40548.6	16.9461	µm	Spot	Position	1	Class B	S100B+	8732
95484.8	40551	17.1076	µm	Spot	Position	1	Class B	S100B+	8733
95519.4	40551.9	16.8271	µm	Spot	Position	1	Class B	S100B+	8734
95486.6	40557.6	16.8407	µm	Spot	Position	1	Class B	S100B+	8735
95482.5	40557.9	17.0225	µm	Spot	Position	1	Class B	S100B+	8736
95483.7	40514.9	17.2706	µm	Spot	Position	1	Class B	S100B+	8737
95494.6	40544.5	17.2177	µm	Spot	Position	1	Class B	S100B+	8738
95519.7	40545	17.2073	µm	Spot	Position	1	Class B	S100B+	8739
95491.5	40559.4	17.1431	µm	Spot	Position	1	Class B	S100B+	8740
95520.7	40550.1	17.707	µm	Spot	Position	1	Class B	S100B+	8743
95493.6	40558.4	17.6513	µm	Spot	Position	1	Class B	S100B+	8744
95492.8	40515.3	17.8848	µm	Spot	Position	1	Class B	S100B+	8745
95476.5	40550.4	17.8891	µm	Spot	Position	1	Class B	S100B+	8746
95477.7	40557	17.8533	µm	Spot	Position	1	Class B	S100B+	8747
95522.5	40535.1	16.9689	µm	Spot	Position	1	Class B	S100B+	8749
95528	40527.3	17.2199	µm	Spot	Position	1	Class B	S100B+	8753
95525.6	40532.3	17.2886	µm	Spot	Position	1	Class B	S100B+	8755
95522.6	40552.3	17.3187	µm	Spot	Position	1	Class B	S100B+	8756
95536	40523.7	17.5944	µm	Spot	Position	1	Class B	S100B+	8760
95523.3	40548.9	17.4841	µm	Spot	Position	1	Class B	S100B+	8762
95450.9	40580.5	16.8567	µm	Spot	Position	1	Class B	S100B+	8840
95437.4	40580.9	16.9535	µm	Spot	Position	1	Class B	S100B+	8841
95464.8	40581.3	16.9959	µm	Spot	Position	1	Class B	S100B+	8842
95452.4	40582.9	17.0616	µm	Spot	Position	1	Class B	S100B+	8843
95446	40593.5	16.861	µm	Spot	Position	1	Class B	S100B+	8844
95475.5	40597.9	17.0489	µm	Spot	Position	1	Class B	S100B+	8846
95435.2	40604.6	16.9605	µm	Spot	Position	1	Class B	S100B+	8847
95456.7	40587.2	17.2385	µm	Spot	Position	1	Class B	S100B+	8852
95469	40587.9	17.2097	µm	Spot	Position	1	Class B	S100B+	8853
95441.5	40594	17.4096	µm	Spot	Position	1	Class B	S100B+	8854
95438.1	40576	17.4604	µm	Spot	Position	1	Class B	S100B+	8860
95440.4	40576.7	17.6633	µm	Spot	Position	1	Class B	S100B+	8861
95452.1	40585.6	17.5412	µm	Spot	Position	1	Class B	S100B+	8862
95441.5	40585.9	17.5828	µm	Spot	Position	1	Class B	S100B+	8863
95463.8	40586.2	17.4964	µm	Spot	Position	1	Class B	S100B+	8864
95459.4	40589.5	17.4662	µm	Spot	Position	1	Class B	S100B+	8865
95466.5	40590.3	17.5672	µm	Spot	Position	1	Class B	S100B+	8866
95474	40600.6	17.4923	µm	Spot	Position	1	Class B	S100B+	8867
95452.9	40577.4	17.9037	µm	Spot	Position	1	Class B	S100B+	8871
95442.4	40578.7	17.8763	µm	Spot	Position	1	Class B	S100B+	8872
95439.3	40578.9	17.8926	µm	Spot	Position	1	Class B	S100B+	8873
95443.2	40594.5	17.7295	µm	Spot	Position	1	Class B	S100B+	8874
95443.2	40596	17.8093	µm	Spot	Position	1	Class B	S100B+	8875
95509.8	40560.6	16.9469	µm	Spot	Position	1	Class B	S100B+	8876
95481.6	40580.4	17.0802	µm	Spot	Position	1	Class B	S100B+	8877
95502.8	40590.5	16.9661	µm	Spot	Position	1	Class B	S100B+	8878
95492.4	40562	17.4045	µm	Spot	Position	1	Class B	S100B+	8879
95490	40563.8	17.3888	µm	Spot	Position	1	Class B	S100B+	8880
95487.9	40560.2	17.5001	µm	Spot	Position	1	Class B	S100B+	8883
95509.2	40563.5	17.6156	µm	Spot	Position	1	Class B	S100B+	8884
95506.4	40564.6	17.6124	µm	Spot	Position	1	Class B	S100B+	8885
95503.1	40564.8	17.6319	µm	Spot	Position	1	Class B	S100B+	8886
95486.7	40584.7	17.695	µm	Spot	Position	1	Class B	S100B+	8887
95475.8	40588.3	17.5241	µm	Spot	Position	1	Class B	S100B+	8888
95493.2	40595.4	17.4502	µm	Spot	Position	1	Class B	S100B+	8889
95497.4	40565	17.8754	µm	Spot	Position	1	Class B	S100B+	8893
95501.3	40586.3	17.835	µm	Spot	Position	1	Class B	S100B+	8894
95477.5	40590	17.7493	µm	Spot	Position	1	Class B	S100B+	8895
95421.2	40648.6	17.0641	µm	Spot	Position	1	Class B	S100B+	8995
95416.3	40650.6	17.3524	µm	Spot	Position	1	Class B	S100B+	9005
95429.1	40617	17.568	µm	Spot	Position	1	Class B	S100B+	9009
95421.1	40637.8	17.5997	µm	Spot	Position	1	Class B	S100B+	9013
95428.3	40611.1	17.8975	µm	Spot	Position	1	Class B	S100B+	9017
95450.1	40605.9	16.975	µm	Spot	Position	1	Class B	S100B+	9024
95445.1	40612.8	16.9784	µm	Spot	Position	1	Class B	S100B+	9025
95430.3	40617.6	16.8729	µm	Spot	Position	1	Class B	S100B+	9026
95456.5	40620.4	16.9714	µm	Spot	Position	1	Class B	S100B+	9027
95470.9	40622.7	16.8897	µm	Spot	Position	1	Class B	S100B+	9028
95453.9	40623.3	17.0386	µm	Spot	Position	1	Class B	S100B+	9029
95468.9	40625.2	16.8808	µm	Spot	Position	1	Class B	S100B+	9030
95463.7	40632.8	16.835	µm	Spot	Position	1	Class B	S100B+	9031
95472.5	40633.7	16.9016	µm	Spot	Position	1	Class B	S100B+	9032
95468.2	40634.8	16.9104	µm	Spot	Position	1	Class B	S100B+	9033
95458.5	40608.3	17.3242	µm	Spot	Position	1	Class B	S100B+	9035
95432	40610	17.4099	µm	Spot	Position	1	Class B	S100B+	9036
95471.8	40611.9	17.1685	µm	Spot	Position	1	Class B	S100B+	9037
95464.3	40630.9	17.2682	µm	Spot	Position	1	Class B	S100B+	9038
95472.9	40632.1	17.279	µm	Spot	Position	1	Class B	S100B+	9039
95447	40606.3	17.6246	µm	Spot	Position	1	Class B	S100B+	9040
95440.7	40609.9	17.4535	µm	Spot	Position	1	Class B	S100B+	9041
95442	40613.4	17.4848	µm	Spot	Position	1	Class B	S100B+	9042
95474.2	40634.8	17.5506	µm	Spot	Position	1	Class B	S100B+	9043
95443.6	40635.2	17.9037	µm	Spot	Position	1	Class B	S100B+	9045
95483.3	40609.8	17.0945	µm	Spot	Position	1	Class B	S100B+	9047
95487.2	40614.1	17.2329	µm	Spot	Position	1	Class B	S100B+	9049
95491	40622.4	17.1527	µm	Spot	Position	1	Class B	S100B+	9052
95479.2	40628	17.2254	µm	Spot	Position	1	Class B	S100B+	9053
95479.5	40606.5	17.588	µm	Spot	Position	1	Class B	S100B+	9057
95478.3	40626.1	17.5321	µm	Spot	Position	1	Class B	S100B+	9059
95483.9	40627.2	17.7034	µm	Spot	Position	1	Class B	S100B+	9060
95478.9	40615.8	17.7644	µm	Spot	Position	1	Class B	S100B+	9064
95487.6	40621.9	17.8693	µm	Spot	Position	1	Class B	S100B+	9065
95420.4	40671.5	16.8677	µm	Spot	Position	1	Class B	S100B+	9188
95428.5	40672.5	17.0225	µm	Spot	Position	1	Class B	S100B+	9189
95418	40674.2	17.0346	µm	Spot	Position	1	Class B	S100B+	9191
95407	40675.7	17.0589	µm	Spot	Position	1	Class B	S100B+	9193
95411	40676	16.9748	µm	Spot	Position	1	Class B	S100B+	9194
95402.7	40676.6	16.9233	µm	Spot	Position	1	Class B	S100B+	9195
95400.9	40685	17.038	µm	Spot	Position	1	Class B	S100B+	9197
95397.9	40685.4	17.3152	µm	Spot	Position	1	Class B	S100B+	9206
95419.7	40688.3	17.1183	µm	Spot	Position	1	Class B	S100B+	9208
95424.6	40682.1	17.9742	µm	Spot	Position	1	Class B	S100B+	9220
95420.3	40684.2	17.9399	µm	Spot	Position	1	Class B	S100B+	9222
95432.9	40658.4	16.857	µm	Spot	Position	1	Class B	S100B+	9226
95430.5	40661.5	16.8747	µm	Spot	Position	1	Class B	S100B+	9227
95441.7	40654.9	17.2881	µm	Spot	Position	1	Class B	S100B+	9229
95442.4	40654	17.5328	µm	Spot	Position	1	Class B	S100B+	9233
95433.1	40668.2	17.7788	µm	Spot	Position	1	Class B	S100B+	9235
95380	40700.8	16.8533	µm	Spot	Position	1	Class B	S100B+	9458
95374.6	40704.8	16.8348	µm	Spot	Position	1	Class B	S100B+	9460
95376.5	40715.4	16.9615	µm	Spot	Position	1	Class B	S100B+	9462
95380.9	40715.8	16.9861	µm	Spot	Position	1	Class B	S100B+	9463
95377.3	40716.8	16.8498	µm	Spot	Position	1	Class B	S100B+	9464
95367.4	40717.9	16.9885	µm	Spot	Position	1	Class B	S100B+	9465
95359.1	40743.1	16.9949	µm	Spot	Position	1	Class B	S100B+	9469
95376.9	40727.8	17.3484	µm	Spot	Position	1	Class B	S100B+	9476
95379.3	40711.8	17.5405	µm	Spot	Position	1	Class B	S100B+	9482
95381.2	40712.9	17.617	µm	Spot	Position	1	Class B	S100B+	9483
95364.9	40718.6	17.5964	µm	Spot	Position	1	Class B	S100B+	9486
95381.1	40725.3	17.4985	µm	Spot	Position	1	Class B	S100B+	9487
95379.4	40703.4	17.7452	µm	Spot	Position	1	Class B	S100B+	9492
95382.5	40703.4	17.8505	µm	Spot	Position	1	Class B	S100B+	9493
95378.1	40713.9	17.7832	µm	Spot	Position	1	Class B	S100B+	9498
95372.7	40719.3	17.8861	µm	Spot	Position	1	Class B	S100B+	9499
95375.5	40719.8	17.7508	µm	Spot	Position	1	Class B	S100B+	9500
95411.4	40698.9	17.9097	µm	Spot	Position	1	Class B	S100B+	9512
95385.6	40707	17.84	µm	Spot	Position	1	Class B	S100B+	9514
95322.2	40779.3	16.8959	µm	Spot	Position	1	Class B	S100B+	9685
95327.3	40774.5	17.2995	µm	Spot	Position	1	Class B	S100B+	9692
95331.8	40776.5	17.1429	µm	Spot	Position	1	Class B	S100B+	9693
95319.7	40780.9	17.371	µm	Spot	Position	1	Class B	S100B+	9695
95309.6	40788.6	17.3497	µm	Spot	Position	1	Class B	S100B+	9696
95331	40767.4	17.4277	µm	Spot	Position	1	Class B	S100B+	9700
95344.8	40759.5	16.998	µm	Spot	Position	1	Class B	S100B+	9715
95352.2	40764.5	16.9615	µm	Spot	Position	1	Class B	S100B+	9716
95337.6	40757.4	17.1652	µm	Spot	Position	1	Class B	S100B+	9718
95348.2	40763.4	17.2442	µm	Spot	Position	1	Class B	S100B+	9719
95344.6	40765.7	17.1616	µm	Spot	Position	1	Class B	S100B+	9720
95337.6	40754.7	17.5693	µm	Spot	Position	1	Class B	S100B+	9722
95339.8	40758	17.9656	µm	Spot	Position	1	Class B	S100B+	9727
95286.4	40806.8	16.927	µm	Spot	Position	1	Class B	S100B+	9870
95285.4	40810.6	17.3875	µm	Spot	Position	1	Class B	S100B+	9880
95265.7	40829.1	17.6523	µm	Spot	Position	1	Class B	S100B+	9885
95270.8	40834.5	17.6487	µm	Spot	Position	1	Class B	S100B+	9888
95301.4	40799.3	17.0667	µm	Spot	Position	1	Class B	S100B+	9898
95302.8	40804.5	17.0589	µm	Spot	Position	1	Class B	S100B+	9899
95293.1	40813.6	17.3283	µm	Spot	Position	1	Class B	S100B+	9905
95300.1	40799.3	17.942	µm	Spot	Position	1	Class B	S100B+	9914
95194.5	40882.1	16.9834	µm	Spot	Position	1	Class B	S100B+	10035
95189	40882	17.3067	µm	Spot	Position	1	Class B	S100B+	10041
95196.4	40878	17.8705	µm	Spot	Position	1	Class B	S100B+	10048
95208.3	40878.8	17.0524	µm	Spot	Position	1	Class B	S100B+	10055
95243.9	40863.4	17.236	µm	Spot	Position	1	Class B	S100B+	10059
95243.4	40866.9	17.2411	µm	Spot	Position	1	Class B	S100B+	10060
95241.8	40863.2	17.5716	µm	Spot	Position	1	Class B	S100B+	10063
95225.6	40866.6	17.9377	µm	Spot	Position	1	Class B	S100B+	10073
95199.3	40875	17.8675	µm	Spot	Position	1	Class B	S100B+	10075
95250.7	40848.1	16.9801	µm	Spot	Position	1	Class B	S100B+	10076
95255.7	40851.1	17.0885	µm	Spot	Position	1	Class B	S100B+	10077
95268.6	40836.8	17.3936	µm	Spot	Position	1	Class B	S100B+	10081
95266.2	40841.1	17.4616	µm	Spot	Position	1	Class B	S100B+	10087
95249.4	40849.8	17.9968	µm	Spot	Position	1	Class B	S100B+	10092
95248.7	40864.6	17.754	µm	Spot	Position	1	Class B	S100B+	10095
95094.5	40923.5	16.9211	µm	Spot	Position	1	Class B	S100B+	10186
95103.3	40925.7	17.2886	µm	Spot	Position	1	Class B	S100B+	10192
95137.6	40909.6	17.0844	µm	Spot	Position	1	Class B	S100B+	10198
95106.7	40912.5	16.9783	µm	Spot	Position	1	Class B	S100B+	10199
95150.5	40920.1	17.0682	µm	Spot	Position	1	Class B	S100B+	10200
95146.5	40900.9	17.2113	µm	Spot	Position	1	Class B	S100B+	10203
95122.4	40907.2	17.3645	µm	Spot	Position	1	Class B	S100B+	10205
95134	40927.6	17.3503	µm	Spot	Position	1	Class B	S100B+	10206
95138.3	40928.3	17.1859	µm	Spot	Position	1	Class B	S100B+	10207
95138.8	40906.9	17.449	µm	Spot	Position	1	Class B	S100B+	10209
95112.6	40909.9	17.5999	µm	Spot	Position	1	Class B	S100B+	10210
95143.6	40913.3	17.5536	µm	Spot	Position	1	Class B	S100B+	10211
95107.3	40904.5	17.7519	µm	Spot	Position	1	Class B	S100B+	10213
95128.2	40908.8	17.7654	µm	Spot	Position	1	Class B	S100B+	10214
95141.2	40914.7	17.9174	µm	Spot	Position	1	Class B	S100B+	10215
95185.3	40883.1	17.0298	µm	Spot	Position	1	Class B	S100B+	10216
95168.9	40903	16.8942	µm	Spot	Position	1	Class B	S100B+	10217
95163.7	40905.8	16.8597	µm	Spot	Position	1	Class B	S100B+	10218
95192.9	40910.1	16.8708	µm	Spot	Position	1	Class B	S100B+	10219
95196.1	40926.4	17.0865	µm	Spot	Position	1	Class B	S100B+	10220
95156	40928.1	17.0088	µm	Spot	Position	1	Class B	S100B+	10221
95192.8	40888.4	17.241	µm	Spot	Position	1	Class B	S100B+	10223
95189.5	40890	17.2894	µm	Spot	Position	1	Class B	S100B+	10224
95165.6	40893.3	17.1241	µm	Spot	Position	1	Class B	S100B+	10225
95172.3	40901.5	17.206	µm	Spot	Position	1	Class B	S100B+	10226
95191.9	40902.2	17.2236	µm	Spot	Position	1	Class B	S100B+	10227
95193.4	40902.3	17.2268	µm	Spot	Position	1	Class B	S100B+	10228
95162.5	40903.4	17.2686	µm	Spot	Position	1	Class B	S100B+	10229
95198.5	40910.1	17.3903	µm	Spot	Position	1	Class B	S100B+	10231
95190	40910.2	17.3944	µm	Spot	Position	1	Class B	S100B+	10232
95195.5	40914.2	17.3489	µm	Spot	Position	1	Class B	S100B+	10233
95158.6	40903.7	17.6441	µm	Spot	Position	1	Class B	S100B+	10234
95160.9	40906	17.4962	µm	Spot	Position	1	Class B	S100B+	10236
95169.1	40909.8	17.4761	µm	Spot	Position	1	Class B	S100B+	10237
95166.8	40918.8	17.6548	µm	Spot	Position	1	Class B	S100B+	10238
95185.4	40890.1	17.8424	µm	Spot	Position	1	Class B	S100B+	10239
95195.1	40891.3	17.7402	µm	Spot	Position	1	Class B	S100B+	10241
95175.4	40896.5	17.8259	µm	Spot	Position	1	Class B	S100B+	10242
95160.2	40898.5	17.8726	µm	Spot	Position	1	Class B	S100B+	10243
95181	40901.3	17.8559	µm	Spot	Position	1	Class B	S100B+	10244
95175.7	40910.9	17.8269	µm	Spot	Position	1	Class B	S100B+	10245
95185.9	40915.4	17.9218	µm	Spot	Position	1	Class B	S100B+	10246
95201	40883.9	17.0036	µm	Spot	Position	1	Class B	S100B+	10247
95230.2	40884.3	16.9323	µm	Spot	Position	1	Class B	S100B+	10248
95217.8	40885.6	17.0519	µm	Spot	Position	1	Class B	S100B+	10249
95203	40909.1	16.879	µm	Spot	Position	1	Class B	S100B+	10252
95204.3	40914	17.0361	µm	Spot	Position	1	Class B	S100B+	10253
95231.3	40887.2	17.5983	µm	Spot	Position	1	Class B	S100B+	10256
95217.7	40888.6	17.6453	µm	Spot	Position	1	Class B	S100B+	10257
95225	40891.3	17.7048	µm	Spot	Position	1	Class B	S100B+	10258
95230.2	40893.2	17.4667	µm	Spot	Position	1	Class B	S100B+	10259
95203.5	40905.4	17.48	µm	Spot	Position	1	Class B	S100B+	10261
95206.6	40922.6	17.5362	µm	Spot	Position	1	Class B	S100B+	10263
95202	40907.1	17.8557	µm	Spot	Position	1	Class B	S100B+	10266
95204	40915.1	17.9484	µm	Spot	Position	1	Class B	S100B+	10267
95045.2	40962.2	16.8836	µm	Spot	Position	1	Class B	S100B+	10313
95037.8	40957.8	17.61	µm	Spot	Position	1	Class B	S100B+	10318
95043.3	40964.6	17.6837	µm	Spot	Position	1	Class B	S100B+	10319
95043.5	40961.9	17.78	µm	Spot	Position	1	Class B	S100B+	10321
95054.9	40964	17.9523	µm	Spot	Position	1	Class B	S100B+	10322
95076.1	40943.2	16.8948	µm	Spot	Position	1	Class B	S100B+	10323
95074.2	40947	17.0242	µm	Spot	Position	1	Class B	S100B+	10325
95061	40965.9	16.992	µm	Spot	Position	1	Class B	S100B+	10327
95067.6	40933	17.4106	µm	Spot	Position	1	Class B	S100B+	10328
95068.4	40936.4	17.188	µm	Spot	Position	1	Class B	S100B+	10329
95064.5	40937.4	17.2258	µm	Spot	Position	1	Class B	S100B+	10330
95090.1	40947.2	17.2381	µm	Spot	Position	1	Class B	S100B+	10331
95083.5	40959.2	17.3695	µm	Spot	Position	1	Class B	S100B+	10332
95095.7	40959.7	17.1412	µm	Spot	Position	1	Class B	S100B+	10333
95082.3	40962.5	17.1212	µm	Spot	Position	1	Class B	S100B+	10334
95074.4	40932.3	17.4545	µm	Spot	Position	1	Class B	S100B+	10335
95096.1	40940.4	17.6968	µm	Spot	Position	1	Class B	S100B+	10336
95085.3	40944.2	17.6723	µm	Spot	Position	1	Class B	S100B+	10337
95094.7	40951.7	17.5701	µm	Spot	Position	1	Class B	S100B+	10338
95089.9	40952.1	17.6604	µm	Spot	Position	1	Class B	S100B+	10339
95091.2	40950.5	17.892	µm	Spot	Position	1	Class B	S100B+	10340
95110.4	40930.6	17.1964	µm	Spot	Position	1	Class B	S100B+	10342
95136.4	40934.7	17.1491	µm	Spot	Position	1	Class B	S100B+	10343
95120.2	40944.2	17.3223	µm	Spot	Position	1	Class B	S100B+	10344
95109.2	40954.3	17.2175	µm	Spot	Position	1	Class B	S100B+	10345
95124.1	40962.6	17.2195	µm	Spot	Position	1	Class B	S100B+	10346
95147.6	40929.6	17.5878	µm	Spot	Position	1	Class B	S100B+	10347
95118.1	40946	17.5697	µm	Spot	Position	1	Class B	S100B+	10349
95117.9	40952.3	17.6113	µm	Spot	Position	1	Class B	S100B+	10350
95132	40932.5	18.0102	µm	Spot	Position	1	Class B	S100B+	10351
95141	40932.7	17.8631	µm	Spot	Position	1	Class B	S100B+	10352
95131.7	40936.5	17.762	µm	Spot	Position	1	Class B	S100B+	10353
95110.7	40943.8	17.7428	µm	Spot	Position	1	Class B	S100B+	10354
95130.6	40944	17.8118	µm	Spot	Position	1	Class B	S100B+	10355
95112.2	40958.9	17.933	µm	Spot	Position	1	Class B	S100B+	10356
95117.7	40962.1	17.7349	µm	Spot	Position	1	Class B	S100B+	10357
95203.4	40930.7	17.3572	µm	Spot	Position	1	Class B	S100B+	10375
95032.1	40981.9	17.3007	µm	Spot	Position	1	Class B	S100B+	10426
95052.3	40991.6	17.1542	µm	Spot	Position	1	Class B	S100B+	10427
95034.2	40983	17.4153	µm	Spot	Position	1	Class B	S100B+	10429
95030.1	40981.4	17.9574	µm	Spot	Position	1	Class B	S100B+	10435
95035.6	40993.2	17.8533	µm	Spot	Position	1	Class B	S100B+	10436
95288.6	39456	18.4779	µm	Spot	Position	1	Class B	S100B+	10648
95323	39483.5	18.5104	µm	Spot	Position	1	Class B	S100B+	10651
95279.3	39517.9	18.1194	µm	Spot	Position	1	Class B	S100B+	10688
95293.5	39521.3	18.5054	µm	Spot	Position	1	Class B	S100B+	10693
95302.6	39502.2	18.7605	µm	Spot	Position	1	Class B	S100B+	10694
95299.1	39528.4	18.9845	µm	Spot	Position	1	Class B	S100B+	10696
95297.5	39552.8	18.0851	µm	Spot	Position	1	Class B	S100B+	10724
95306.2	39601.4	18.0929	µm	Spot	Position	1	Class B	S100B+	10759
95292.1	39612.7	18.0394	µm	Spot	Position	1	Class B	S100B+	10760
95296.3	39621.5	18.1544	µm	Spot	Position	1	Class B	S100B+	10761
95312	39669.5	18.7352	µm	Spot	Position	1	Class B	S100B+	10831
95313.3	39699.6	18.0973	µm	Spot	Position	1	Class B	S100B+	10872
95305.9	39704.1	18.3935	µm	Spot	Position	1	Class B	S100B+	10875
95316.4	39704.7	18.3413	µm	Spot	Position	1	Class B	S100B+	10876
95319.6	39718.4	18.4795	µm	Spot	Position	1	Class B	S100B+	10877
95328.2	39759.7	18.2361	µm	Spot	Position	1	Class B	S100B+	10929
95307.5	39729.6	18.5172	µm	Spot	Position	1	Class B	S100B+	10930
95333.5	39804.7	18.2115	µm	Spot	Position	1	Class B	S100B+	10993
95339	39852.1	18.4171	µm	Spot	Position	1	Class B	S100B+	11066
95354.7	39893.4	18.3705	µm	Spot	Position	1	Class B	S100B+	11136
95347.6	39882.5	18.7034	µm	Spot	Position	1	Class B	S100B+	11138
95346.3	39888.9	18.6801	µm	Spot	Position	1	Class B	S100B+	11139
95353.2	39892.8	18.7982	µm	Spot	Position	1	Class B	S100B+	11140
95359	39904	18.9665	µm	Spot	Position	1	Class B	S100B+	11142
95360.6	39928.8	18.0826	µm	Spot	Position	1	Class B	S100B+	11226
95377.4	39951.7	18.6421	µm	Spot	Position	1	Class B	S100B+	11235
95363	39970.5	18.172	µm	Spot	Position	1	Class B	S100B+	11325
95382	39990.4	18.0502	µm	Spot	Position	1	Class B	S100B+	11326
95382.9	39988.8	19.0299	µm	Spot	Position	1	Class B	S100B+	11332
95375.9	39994.6	19.2034	µm	Spot	Position	1	Class B	S100B+	11333
95377.1	40006.2	19.0974	µm	Spot	Position	1	Class B	S100B+	11431
95405.6	40060.6	18.4852	µm	Spot	Position	1	Class B	S100B+	11543
95406	40077.1	18.4905	µm	Spot	Position	1	Class B	S100B+	11546
95407	40085.1	18.4791	µm	Spot	Position	1	Class B	S100B+	11548
95407.7	40076.2	18.9417	µm	Spot	Position	1	Class B	S100B+	11554
95415.8	40104.7	18.1908	µm	Spot	Position	1	Class B	S100B+	11676
95417.1	40124	18.2137	µm	Spot	Position	1	Class B	S100B+	11677
95408.2	40109.8	18.8285	µm	Spot	Position	1	Class B	S100B+	11683
95405.6	40103.2	18.924	µm	Spot	Position	1	Class B	S100B+	11686
95417.5	40145	18.2493	µm	Spot	Position	1	Class B	S100B+	11830
95426.5	40159.4	18.7392	µm	Spot	Position	1	Class B	S100B+	11846
95429	40168.8	18.8616	µm	Spot	Position	1	Class B	S100B+	11847
95415.6	40145	19.1312	µm	Spot	Position	1	Class B	S100B+	11851
95433.5	40158.4	18.1077	µm	Spot	Position	1	Class B	S100B+	11859
95433.2	40162.7	18.1648	µm	Spot	Position	1	Class B	S100B+	11860
95436.8	40181.4	18.9717	µm	Spot	Position	1	Class B	S100B+	11877
95445.8	40211	18.3145	µm	Spot	Position	1	Class B	S100B+	11986
95440.1	40222.5	18.4854	µm	Spot	Position	1	Class B	S100B+	11987
95442.3	40224	18.5037	µm	Spot	Position	1	Class B	S100B+	11988
95449.1	40235.9	18.4537	µm	Spot	Position	1	Class B	S100B+	11989
95444.1	40215.1	18.6569	µm	Spot	Position	1	Class B	S100B+	11991
95449.5	40223.9	18.7586	µm	Spot	Position	1	Class B	S100B+	11993
95454.9	40258.9	18.4198	µm	Spot	Position	1	Class B	S100B+	12120
95449.5	40274.2	18.5588	µm	Spot	Position	1	Class B	S100B+	12123
95446.9	40277.2	18.5865	µm	Spot	Position	1	Class B	S100B+	12124
95447.2	40247.3	18.8344	µm	Spot	Position	1	Class B	S100B+	12126
95459.9	40256.2	18.7052	µm	Spot	Position	1	Class B	S100B+	12128
95452.3	40257.9	18.7511	µm	Spot	Position	1	Class B	S100B+	12129
95460.2	40262.7	18.6963	µm	Spot	Position	1	Class B	S100B+	12131
95454	40239.3	18.9928	µm	Spot	Position	1	Class B	S100B+	12132
95465.3	40269.8	19.017	µm	Spot	Position	1	Class B	S100B+	12136
95470.8	40320.5	18.0477	µm	Spot	Position	1	Class B	S100B+	12294
95474.2	40294.6	18.4263	µm	Spot	Position	1	Class B	S100B+	12296
95461.1	40305.3	18.4112	µm	Spot	Position	1	Class B	S100B+	12297
95466.5	40310.8	18.5311	µm	Spot	Position	1	Class B	S100B+	12301
95461.5	40318.3	18.3328	µm	Spot	Position	1	Class B	S100B+	12302
95463.9	40321.4	18.8335	µm	Spot	Position	1	Class B	S100B+	12305
95477	40323.8	18.494	µm	Spot	Position	1	Class B	S100B+	12321
95485.7	40354.9	18.1258	µm	Spot	Position	1	Class B	S100B+	12461
95484.3	40357	18.0658	µm	Spot	Position	1	Class B	S100B+	12462
95476.1	40370.2	18.2354	µm	Spot	Position	1	Class B	S100B+	12463
95478.1	40336.7	18.5967	µm	Spot	Position	1	Class B	S100B+	12467
95489.3	40372.8	18.4701	µm	Spot	Position	1	Class B	S100B+	12471
95479.1	40335.5	18.7129	µm	Spot	Position	1	Class B	S100B+	12473
95487.1	40341	18.6271	µm	Spot	Position	1	Class B	S100B+	12474
95496.8	40375.8	18.1713	µm	Spot	Position	1	Class B	S100B+	12602
95501	40391.3	18.1205	µm	Spot	Position	1	Class B	S100B+	12604
95495.3	40393.5	18.0991	µm	Spot	Position	1	Class B	S100B+	12605
95502.6	40399.2	18.0991	µm	Spot	Position	1	Class B	S100B+	12606
95517.4	40418.4	18.0149	µm	Spot	Position	1	Class B	S100B+	12607
95480.4	40377.2	18.5034	µm	Spot	Position	1	Class B	S100B+	12608
95491.5	40379.3	18.3677	µm	Spot	Position	1	Class B	S100B+	12609
95477.6	40401.5	18.5177	µm	Spot	Position	1	Class B	S100B+	12610
95518.6	40413.9	18.3888	µm	Spot	Position	1	Class B	S100B+	12612
95504.5	40390.9	18.7241	µm	Spot	Position	1	Class B	S100B+	12616
95503.5	40397.9	18.6685	µm	Spot	Position	1	Class B	S100B+	12618
95498.3	40378.8	18.9335	µm	Spot	Position	1	Class B	S100B+	12622
95478.2	40379.8	19.1619	µm	Spot	Position	1	Class B	S100B+	12623
95494.9	40384.2	19.1116	µm	Spot	Position	1	Class B	S100B+	12625
95479.4	40401.1	19.1116	µm	Spot	Position	1	Class B	S100B+	12626
95481.2	40409.6	19.0007	µm	Spot	Position	1	Class B	S100B+	12628
95520.4	40447.7	18.1373	µm	Spot	Position	1	Class B	S100B+	12793
95520.4	40425.9	18.4184	µm	Spot	Position	1	Class B	S100B+	12794
95516.6	40451.5	18.4431	µm	Spot	Position	1	Class B	S100B+	12797
95489.1	40456.7	18.5264	µm	Spot	Position	1	Class B	S100B+	12798
95492	40466.3	18.3748	µm	Spot	Position	1	Class B	S100B+	12799
95517.9	40428.5	18.8038	µm	Spot	Position	1	Class B	S100B+	12802
95495.3	40445.6	18.8035	µm	Spot	Position	1	Class B	S100B+	12804
95484.9	40422.7	19.1494	µm	Spot	Position	1	Class B	S100B+	12806
95519.4	40425.3	19.0359	µm	Spot	Position	1	Class B	S100B+	12807
95484	40426	18.9636	µm	Spot	Position	1	Class B	S100B+	12808
95511.8	40437.4	18.9753	µm	Spot	Position	1	Class B	S100B+	12810
95487	40455.7	18.9496	µm	Spot	Position	1	Class B	S100B+	12814
95536.5	40466.1	18.1068	µm	Spot	Position	1	Class B	S100B+	12822
95522.5	40440.4	18.3304	µm	Spot	Position	1	Class B	S100B+	12826
95531.8	40452.2	18.5644	µm	Spot	Position	1	Class B	S100B+	12828
95529.4	40462.8	18.4352	µm	Spot	Position	1	Class B	S100B+	12829
95527.4	40436.8	18.9708	µm	Spot	Position	1	Class B	S100B+	12840
95530.6	40451.3	18.982	µm	Spot	Position	1	Class B	S100B+	12843
95501.2	40475.2	18.2622	µm	Spot	Position	1	Class B	S100B+	12974
95505.8	40490.3	18.2244	µm	Spot	Position	1	Class B	S100B+	12975
95502.7	40490.6	18.0765	µm	Spot	Position	1	Class B	S100B+	12976
95478.9	40497.9	18.5441	µm	Spot	Position	1	Class B	S100B+	12979
95497.4	40506.2	18.3294	µm	Spot	Position	1	Class B	S100B+	12980
95519	40509.8	18.3821	µm	Spot	Position	1	Class B	S100B+	12981
95479.7	40510.8	18.4701	µm	Spot	Position	1	Class B	S100B+	12982
95503.2	40467.4	18.8445	µm	Spot	Position	1	Class B	S100B+	12983
95496.4	40480.9	18.6571	µm	Spot	Position	1	Class B	S100B+	12985
95506.7	40488	18.6731	µm	Spot	Position	1	Class B	S100B+	12987
95499.5	40503.4	18.9118	µm	Spot	Position	1	Class B	S100B+	12988
95502.4	40474.2	19.12	µm	Spot	Position	1	Class B	S100B+	12990
95477.8	40494.2	18.9666	µm	Spot	Position	1	Class B	S100B+	12992
95477.4	40498.9	18.9496	µm	Spot	Position	1	Class B	S100B+	12994
95504.5	40500.9	19.1284	µm	Spot	Position	1	Class B	S100B+	12995
95530	40478.5	18.1549	µm	Spot	Position	1	Class B	S100B+	12997
95527.5	40488.3	18.5429	µm	Spot	Position	1	Class B	S100B+	13004
95529	40491.8	18.3218	µm	Spot	Position	1	Class B	S100B+	13005
95523.3	40502.9	18.3916	µm	Spot	Position	1	Class B	S100B+	13006
95529.3	40509	18.5327	µm	Spot	Position	1	Class B	S100B+	13008
95533	40468.9	18.6971	µm	Spot	Position	1	Class B	S100B+	13011
95536.9	40492.3	18.8845	µm	Spot	Position	1	Class B	S100B+	13012
95531.6	40468	19.1239	µm	Spot	Position	1	Class B	S100B+	13017
95463.9	40535.6	18.224	µm	Spot	Position	1	Class B	S100B+	13136
95463.2	40550.5	18.149	µm	Spot	Position	1	Class B	S100B+	13138
95459.5	40551.5	18.1195	µm	Spot	Position	1	Class B	S100B+	13139
95462.2	40556.6	18.283	µm	Spot	Position	1	Class B	S100B+	13140
95460.3	40538.1	18.5715	µm	Spot	Position	1	Class B	S100B+	13143
95463.2	40538.5	18.4696	µm	Spot	Position	1	Class B	S100B+	13144
95461.3	40553.4	18.4136	µm	Spot	Position	1	Class B	S100B+	13146
95450.8	40553.8	18.3981	µm	Spot	Position	1	Class B	S100B+	13147
95473	40555.1	18.5182	µm	Spot	Position	1	Class B	S100B+	13148
95464.1	40517.8	18.8088	µm	Spot	Position	1	Class B	S100B+	13149
95463.4	40525.3	18.7569	µm	Spot	Position	1	Class B	S100B+	13150
95467.4	40522.2	19.1761	µm	Spot	Position	1	Class B	S100B+	13155
95499.9	40543.3	18.2981	µm	Spot	Position	1	Class B	S100B+	13164
95491.4	40550.6	18.0808	µm	Spot	Position	1	Class B	S100B+	13166
95492.4	40553	18.2295	µm	Spot	Position	1	Class B	S100B+	13167
95488.5	40558.3	18.1361	µm	Spot	Position	1	Class B	S100B+	13168
95485.1	40514.7	18.4666	µm	Spot	Position	1	Class B	S100B+	13170
95495.1	40541.7	18.4557	µm	Spot	Position	1	Class B	S100B+	13171
95488.2	40544.1	18.5492	µm	Spot	Position	1	Class B	S100B+	13172
95518.3	40547.9	18.5536	µm	Spot	Position	1	Class B	S100B+	13173
95492	40548.9	18.3602	µm	Spot	Position	1	Class B	S100B+	13174
95489.9	40514.4	18.8435	µm	Spot	Position	1	Class B	S100B+	13175
95483.5	40519.5	18.7261	µm	Spot	Position	1	Class B	S100B+	13176
95486.9	40514.6	19.0967	µm	Spot	Position	1	Class B	S100B+	13180
95521.1	40531.8	18.965	µm	Spot	Position	1	Class B	S100B+	13182
95485.7	40538.6	19.0603	µm	Spot	Position	1	Class B	S100B+	13183
95500	40546.4	18.9339	µm	Spot	Position	1	Class B	S100B+	13184
95484.1	40555.8	19.0158	µm	Spot	Position	1	Class B	S100B+	13185
95531.1	40525.7	18.1166	µm	Spot	Position	1	Class B	S100B+	13188
95527.3	40529.5	18.3073	µm	Spot	Position	1	Class B	S100B+	13189
95522	40534.1	18.1648	µm	Spot	Position	1	Class B	S100B+	13191
95531.4	40545.1	18.0759	µm	Spot	Position	1	Class B	S100B+	13192
95527.4	40527.8	18.4367	µm	Spot	Position	1	Class B	S100B+	13197
95535.6	40541	18.5907	µm	Spot	Position	1	Class B	S100B+	13200
95525.2	40524.4	18.6638	µm	Spot	Position	1	Class B	S100B+	13205
95527.9	40531.1	18.727	µm	Spot	Position	1	Class B	S100B+	13206
95530.7	40538.6	18.7445	µm	Spot	Position	1	Class B	S100B+	13208
95530.4	40543	18.8577	µm	Spot	Position	1	Class B	S100B+	13210
95527	40526.8	19.1565	µm	Spot	Position	1	Class B	S100B+	13213
95525	40542.1	19.0045	µm	Spot	Position	1	Class B	S100B+	13216
95451.3	40576.6	18.2949	µm	Spot	Position	1	Class B	S100B+	13299
95448.2	40586.8	18.0539	µm	Spot	Position	1	Class B	S100B+	13301
95455.2	40588.7	18.1607	µm	Spot	Position	1	Class B	S100B+	13302
95456.6	40588.8	18.2654	µm	Spot	Position	1	Class B	S100B+	13303
95455.5	40595.8	18.1662	µm	Spot	Position	1	Class B	S100B+	13304
95437.5	40604.4	18.2868	µm	Spot	Position	1	Class B	S100B+	13305
95437.9	40585.2	18.3812	µm	Spot	Position	1	Class B	S100B+	13307
95447.3	40587.3	18.4797	µm	Spot	Position	1	Class B	S100B+	13308
95445.1	40591.2	18.408	µm	Spot	Position	1	Class B	S100B+	13309
95451.2	40602.7	18.4258	µm	Spot	Position	1	Class B	S100B+	13310
95453.9	40589.9	18.7966	µm	Spot	Position	1	Class B	S100B+	13314
95462.7	40591.8	18.64	µm	Spot	Position	1	Class B	S100B+	13315
95465.1	40591.8	18.6869	µm	Spot	Position	1	Class B	S100B+	13316
95458.6	40601.4	18.7591	µm	Spot	Position	1	Class B	S100B+	13317
95455.6	40572.2	19.1848	µm	Spot	Position	1	Class B	S100B+	13320
95444.1	40579.1	18.958	µm	Spot	Position	1	Class B	S100B+	13322
95455.4	40585.5	18.9704	µm	Spot	Position	1	Class B	S100B+	13324
95439.2	40586	19.1477	µm	Spot	Position	1	Class B	S100B+	13325
95472.9	40594.2	19.0928	µm	Spot	Position	1	Class B	S100B+	13327
95482.8	40604	18.1771	µm	Spot	Position	1	Class B	S100B+	13331
95477.9	40605	18.33	µm	Spot	Position	1	Class B	S100B+	13334
95497.1	40568.1	18.8054	µm	Spot	Position	1	Class B	S100B+	13337
95477.6	40587.3	19.144	µm	Spot	Position	1	Class B	S100B+	13339
95489.7	40595.7	19.1992	µm	Spot	Position	1	Class B	S100B+	13341
95429.1	40622.7	18.2154	µm	Spot	Position	1	Class B	S100B+	13447
[truncated: 834 more rows]

## Sheet: Sample 1-Urah+S100b-Position - 
AC335 Urah 555S100b 488_R_[ii21_TileScan_2_Merged_Image_22]_Position
Position
====================
Position X	Position Y	Position Z	Unit	Category	Collection	Time	S100b	dapi	ID
60853.2	41812.5	3.02789	µm	Spot	Position	1		DAPI-	22
60973.4	41852.2	2.84981	µm	Spot	Position	1		DAPI-	31
60848	41796.2	4.70153	µm	Spot	Position	1		DAPI-	38
61063	41811.4	4.5204	µm	Spot	Position	1		DAPI-	42
61142.5	41738.1	6.34746	µm	Spot	Position	1		DAPI-	61
61249.1	41668	7.6736	µm	Spot	Position	1		DAPI-	91
61369.1	41597.2	9.12341	µm	Spot	Position	1		DAPI-	114
61889.4	41627.9	8.58194	µm	Spot	Position	1		DAPI-	129
61142.2	41736.8	9.21626	µm	Spot	Position	1		DAPI-	139
61178.9	41706.7	8.64101	µm	Spot	Position	1		DAPI-	140
61652.6	41498	10.7273	µm	Spot	Position	1		DAPI-	159
61653.6	41498.3	10.572	µm	Spot	Position	1		DAPI-	160
61465.5	41552.1	10.2713	µm	Spot	Position	1		DAPI-	171
61546.3	41536.5	10.674	µm	Spot	Position	1		DAPI-	183
61817.4	41527.6	10.4126	µm	Spot	Position	1		DAPI-	186
61393	41587.7	10.128	µm	Spot	Position	1		DAPI-	188
61423.5	41579.7	10.0931	µm	Spot	Position	1		DAPI-	197
61422.2	41578.8	10.2669	µm	Spot	Position	1		DAPI-	201
61193.9	41694	10.4571	µm	Spot	Position	1		DAPI-	222
61254.8	41659.9	10.3403	µm	Spot	Position	1		DAPI-	223
61229.4	41671.9	10.6921	µm	Spot	Position	1		DAPI-	224
61445	41558.8	11.3981	µm	Spot	Position	1		DAPI-	268
61556.2	41531.5	11.1413	µm	Spot	Position	1		DAPI-	281
61335.9	41613.1	11.52	µm	Spot	Position	1		DAPI-	311
61684	41446.5	12.3948	µm	Spot	Position	1		DAPI-	338
61722.3	41483.7	12.5554	µm	Spot	Position	1		DAPI-	385
61726.1	41484	12.7294	µm	Spot	Position	1		DAPI-	388
61554	41520.9	13.1472	µm	Spot	Position	1		DAPI-	408
61388.6	41583.8	12.1319	µm	Spot	Position	1		DAPI-	424
61657.6	41425.9	13.2801	µm	Spot	Position	1		DAPI-	435
61658.4	41447.4	13.8265	µm	Spot	Position	1		DAPI-	451
61452.4	41554.2	14.0639	µm	Spot	Position	1		DAPI-	487
61413.8	41569.5	13.4259	µm	Spot	Position	1		DAPI-	495
61651.2	41455.1	16.136	µm	Spot	Position	1		DAPI-	511
61652.8	41454.5	16.8008	µm	Spot	Position	1		DAPI-	513
61635.8	41475.5	16.0895	µm	Spot	Position	1		DAPI-	514
60892.6	41862.9	1.0561	µm	Spot	Position	1	S100B+	DAPI+	4
60903.5	41866.4	1.10948	µm	Spot	Position	1	S100B+	DAPI+	5
60858.7	41822.8	2.3629	µm	Spot	Position	1	S100B+	DAPI+	8
60830.9	41860.4	2.31237	µm	Spot	Position	1	S100B+	DAPI+	10
60843.5	41852	1.67465	µm	Spot	Position	1	S100B+	DAPI+	12
60861.6	41870.8	2.18545	µm	Spot	Position	1	S100B+	DAPI+	13
60890.2	41869.2	1.57756	µm	Spot	Position	1	S100B+	DAPI+	15
60957.9	41852.8	2.2023	µm	Spot	Position	1	S100B+	DAPI+	16
61112.3	41774.8	3.49345	µm	Spot	Position	1	S100B+	DAPI+	17
60831	41829.2	2.62549	µm	Spot	Position	1	S100B+	DAPI+	18
60846.6	41835.9	2.49233	µm	Spot	Position	1	S100B+	DAPI+	20
60844	41806.3	2.95332	µm	Spot	Position	1	S100B+	DAPI+	21
60866.6	41871.2	2.62253	µm	Spot	Position	1	S100B+	DAPI+	25
60884.7	41871.7	2.57944	µm	Spot	Position	1	S100B+	DAPI+	26
60884.4	41845.1	3.00359	µm	Spot	Position	1	S100B+	DAPI+	28
60952.2	41853.7	2.9367	µm	Spot	Position	1	S100B+	DAPI+	32
61099.3	41783.2	4.26843	µm	Spot	Position	1	S100B+	DAPI+	33
61097.4	41783.4	4.63567	µm	Spot	Position	1	S100B+	DAPI+	35
60849.8	41805.8	3.67408	µm	Spot	Position	1	S100B+	DAPI+	36
60848.9	41802.1	4.18775	µm	Spot	Position	1	S100B+	DAPI+	37
60845.5	41804	4.60842	µm	Spot	Position	1	S100B+	DAPI+	39
61069.9	41805.1	4.47443	µm	Spot	Position	1	S100B+	DAPI+	41
61147.4	41746.6	4.90823	µm	Spot	Position	1	S100B+	DAPI+	43
61159.7	41728.9	5.46067	µm	Spot	Position	1	S100B+	DAPI+	44
61093.6	41786.3	5.08704	µm	Spot	Position	1	S100B+	DAPI+	46
61108.6	41774	5.18717	µm	Spot	Position	1	S100B+	DAPI+	47
61111.3	41769.4	5.73106	µm	Spot	Position	1	S100B+	DAPI+	48
61132.5	41749.6	5.45704	µm	Spot	Position	1	S100B+	DAPI+	49
61137.9	41755.3	5.93772	µm	Spot	Position	1	S100B+	DAPI+	51
61123.2	41763.4	5.98445	µm	Spot	Position	1	S100B+	DAPI+	52
61295.4	41648.3	6.86467	µm	Spot	Position	1	S100B+	DAPI+	53
61299.7	41646.7	7.08923	µm	Spot	Position	1	S100B+	DAPI+	54
61223.1	41698	7.03617	µm	Spot	Position	1	S100B+	DAPI+	55
61280.6	41660.3	6.89616	µm	Spot	Position	1	S100B+	DAPI+	56
61268.5	41670.1	7.00313	µm	Spot	Position	1	S100B+	DAPI+	57
61161.2	41722.8	6.14472	µm	Spot	Position	1	S100B+	DAPI+	58
61151.8	41730.8	6.21122	µm	Spot	Position	1	S100B+	DAPI+	59
61155.9	41730.4	6.57332	µm	Spot	Position	1	S100B+	DAPI+	60
61145.8	41741.1	6.53798	µm	Spot	Position	1	S100B+	DAPI+	62
61155.7	41728.6	6.9828	µm	Spot	Position	1	S100B+	DAPI+	64
61135.8	41745.6	7.16308	µm	Spot	Position	1	S100B+	DAPI+	65
61185.9	41716.2	6.18969	µm	Spot	Position	1	S100B+	DAPI+	67
61165.1	41732.4	6.01035	µm	Spot	Position	1	S100B+	DAPI+	68
61187	41716.9	6.87469	µm	Spot	Position	1	S100B+	DAPI+	70
61206.7	41705.4	7.03795	µm	Spot	Position	1	S100B+	DAPI+	71
61173.3	41719.1	6.95046	µm	Spot	Position	1	S100B+	DAPI+	72
61101	41781.3	6.21694	µm	Spot	Position	1	S100B+	DAPI+	73
61102.9	41772.4	6.35289	µm	Spot	Position	1	S100B+	DAPI+	74
61098.5	41774.3	6.47823	µm	Spot	Position	1	S100B+	DAPI+	75
61134.2	41756	6.18859	µm	Spot	Position	1	S100B+	DAPI+	76
61140.6	41756.3	6.72686	µm	Spot	Position	1	S100B+	DAPI+	77
61291.6	41649.3	7.60574	µm	Spot	Position	1	S100B+	DAPI+	81
61288.6	41656.1	7.86871	µm	Spot	Position	1	S100B+	DAPI+	82
61298.1	41639.3	8.24634	µm	Spot	Position	1	S100B+	DAPI+	83
61327.3	41626.1	7.29327	µm	Spot	Position	1	S100B+	DAPI+	84
61315.1	41637.1	7.40271	µm	Spot	Position	1	S100B+	DAPI+	85
61306.6	41641.9	7.85709	µm	Spot	Position	1	S100B+	DAPI+	87
61201.9	41696	8.11829	µm	Spot	Position	1	S100B+	DAPI+	88
61250.4	41670.1	7.32236	µm	Spot	Position	1	S100B+	DAPI+	89
61252.7	41671.9	7.44627	µm	Spot	Position	1	S100B+	DAPI+	90
61228.3	41692.9	7.58657	µm	Spot	Position	1	S100B+	DAPI+	92
61221.4	41687.8	7.84046	µm	Spot	Position	1	S100B+	DAPI+	93
61234.7	41687.6	7.92465	µm	Spot	Position	1	S100B+	DAPI+	94
61212.1	41694.6	8.36048	µm	Spot	Position	1	S100B+	DAPI+	95
61269.7	41659.4	7.8251	µm	Spot	Position	1	S100B+	DAPI+	96
61274.3	41663.2	7.81911	µm	Spot	Position	1	S100B+	DAPI+	97
61138.8	41739.8	8.0426	µm	Spot	Position	1	S100B+	DAPI+	101
61118.2	41765.7	7.77919	µm	Spot	Position	1	S100B+	DAPI+	103
61484	41550	9.19206	µm	Spot	Position	1	S100B+	DAPI+	105
61481.6	41554.9	9.31136	µm	Spot	Position	1	S100B+	DAPI+	106
61446.5	41562.9	9.4175	µm	Spot	Position	1	S100B+	DAPI+	107
61509.2	41541.4	9.29062	µm	Spot	Position	1	S100B+	DAPI+	108
61501.7	41545.2	9.15296	µm	Spot	Position	1	S100B+	DAPI+	109
61510.7	41541.1	9.31019	µm	Spot	Position	1	S100B+	DAPI+	110
61500.6	41541.6	9.30749	µm	Spot	Position	1	S100B+	DAPI+	111
61498.8	41542.6	9.59556	µm	Spot	Position	1	S100B+	DAPI+	112
61377.4	41596.1	9.05687	µm	Spot	Position	1	S100B+	DAPI+	113
61442.1	41565.4	9.48917	µm	Spot	Position	1	S100B+	DAPI+	116
61297.7	41645.4	8.7946	µm	Spot	Position	1	S100B+	DAPI+	117
61293.6	41650.3	8.79892	µm	Spot	Position	1	S100B+	DAPI+	118
61278.9	41656.5	8.97252	µm	Spot	Position	1	S100B+	DAPI+	119
61294.8	41638.9	9.08703	µm	Spot	Position	1	S100B+	DAPI+	120
61321.5	41625.4	8.53055	µm	Spot	Position	1	S100B+	DAPI+	121
61329.5	41626	8.76608	µm	Spot	Position	1	S100B+	DAPI+	124
61316.4	41627.8	8.91828	µm	Spot	Position	1	S100B+	DAPI+	125
61314.5	41631.6	8.83068	µm	Spot	Position	1	S100B+	DAPI+	126
61318.6	41627.3	9.10857	µm	Spot	Position	1	S100B+	DAPI+	127
61314.1	41630.6	9.24455	µm	Spot	Position	1	S100B+	DAPI+	128
61885.5	41628.9	8.54427	µm	Spot	Position	1	S100B+	DAPI+	130
61194.7	41695.9	8.97133	µm	Spot	Position	1	S100B+	DAPI+	131
61229.4	41680.5	8.79295	µm	Spot	Position	1	S100B+	DAPI+	132
61265.7	41665.7	9.25983	µm	Spot	Position	1	S100B+	DAPI+	133
61146.7	41731.8	8.56129	µm	Spot	Position	1	S100B+	DAPI+	137
61134.1	41743.9	8.44699	µm	Spot	Position	1	S100B+	DAPI+	138
61168.8	41717.8	9.03616	µm	Spot	Position	1	S100B+	DAPI+	141
61944.2	41740.9	8.48682	µm	Spot	Position	1	S100B+	DAPI+	142
61941.7	41742.3	8.86265	µm	Spot	Position	1	S100B+	DAPI+	144
61928.8	41705.7	9.07389	µm	Spot	Position	1	S100B+	DAPI+	145
61941.9	41740.8	9.09818	µm	Spot	Position	1	S100B+	DAPI+	148
61945.5	41755.6	8.80644	µm	Spot	Position	1	S100B+	DAPI+	150
61582.5	41515.1	10.2455	µm	Spot	Position	1	S100B+	DAPI+	152
61632.6	41492.4	10.3443	µm	Spot	Position	1	S100B+	DAPI+	153
61639.1	41496.8	10.6958	µm	Spot	Position	1	S100B+	DAPI+	158
61692.7	41486.1	10.6396	µm	Spot	Position	1	S100B+	DAPI+	162
61461.5	41555.2	9.73139	µm	Spot	Position	1	S100B+	DAPI+	164
61468.6	41561.3	9.80481	µm	Spot	Position	1	S100B+	DAPI+	165
61471.8	41551.4	10.1887	µm	Spot	Position	1	S100B+	DAPI+	166
61481.1	41551.8	10.1428	µm	Spot	Position	1	S100B+	DAPI+	167
61467.6	41555.8	9.97245	µm	Spot	Position	1	S100B+	DAPI+	168
61485.2	41551.8	10.3095	µm	Spot	Position	1	S100B+	DAPI+	170
61483.1	41558	10.7646	µm	Spot	Position	1	S100B+	DAPI+	172
61501	41545.2	9.88058	µm	Spot	Position	1	S100B+	DAPI+	173
61530.1	41539.5	10.4165	µm	Spot	Position	1	S100B+	DAPI+	174
61520.4	41539.9	10.3634	µm	Spot	Position	1	S100B+	DAPI+	175
61504	41540.2	10.3843	µm	Spot	Position	1	S100B+	DAPI+	176
61497.7	41547.1	10.3748	µm	Spot	Position	1	S100B+	DAPI+	177
61522.5	41541	10.5383	µm	Spot	Position	1	S100B+	DAPI+	179
61534.1	41535.6	9.87448	µm	Spot	Position	1	S100B+	DAPI+	180
61550.3	41526.4	10.5576	µm	Spot	Position	1	S100B+	DAPI+	181
61537.5	41534.6	10.7302	µm	Spot	Position	1	S100B+	DAPI+	182
61583.2	41519.8	10.2843	µm	Spot	Position	1	S100B+	DAPI+	184
61795.3	41524.9	10.5511	µm	Spot	Position	1	S100B+	DAPI+	185
61375.8	41594.7	10.2816	µm	Spot	Position	1	S100B+	DAPI+	189
61375.1	41596.2	10.4156	µm	Spot	Position	1	S100B+	DAPI+	190
61381	41595.7	10.8039	µm	Spot	Position	1	S100B+	DAPI+	193
61427.2	41578.6	9.65409	µm	Spot	Position	1	S100B+	DAPI+	194
61441.2	41569.2	10.1192	µm	Spot	Position	1	S100B+	DAPI+	195
61422.5	41576.1	10.1793	µm	Spot	Position	1	S100B+	DAPI+	196
61408.3	41585.6	10.023	µm	Spot	Position	1	S100B+	DAPI+	198
61441	41566.6	10.2083	µm	Spot	Position	1	S100B+	DAPI+	199
61438.6	41570.9	10.3158	µm	Spot	Position	1	S100B+	DAPI+	200
61430.7	41573.8	10.7677	µm	Spot	Position	1	S100B+	DAPI+	204
61855.2	41599	10.533	µm	Spot	Position	1	S100B+	DAPI+	206
61857.2	41593.3	10.7696	µm	Spot	Position	1	S100B+	DAPI+	208
61275.1	41651	9.72053	µm	Spot	Position	1	S100B+	DAPI+	209
61297.6	41637	10.0646	µm	Spot	Position	1	S100B+	DAPI+	210
61280.4	41652.7	10.3217	µm	Spot	Position	1	S100B+	DAPI+	211
61300.8	41636	10.5615	µm	Spot	Position	1	S100B+	DAPI+	212
61272.9	41656.6	10.5954	µm	Spot	Position	1	S100B+	DAPI+	213
61305.8	41635.9	9.87984	µm	Spot	Position	1	S100B+	DAPI+	214
61334.8	41617.3	10.2958	µm	Spot	Position	1	S100B+	DAPI+	215
61356.8	41610.8	9.82662	µm	Spot	Position	1	S100B+	DAPI+	216
61356.6	41615.2	10.48	µm	Spot	Position	1	S100B+	DAPI+	217
61353.9	41616.6	10.3628	µm	Spot	Position	1	S100B+	DAPI+	218
61875.5	41629.8	10.4499	µm	Spot	Position	1	S100B+	DAPI+	221
61602.2	41507.6	11.123	µm	Spot	Position	1	S100B+	DAPI+	232
61603.4	41502.8	11.4601	µm	Spot	Position	1	S100B+	DAPI+	233
61607.5	41498.6	11.7553	µm	Spot	Position	1	S100B+	DAPI+	234
61649.2	41490.8	11.4804	µm	Spot	Position	1	S100B+	DAPI+	239
61652.9	41492.6	11.6092	µm	Spot	Position	1	S100B+	DAPI+	240
61631.6	41496.1	11.5789	µm	Spot	Position	1	S100B+	DAPI+	241
61633.4	41497.4	11.4507	µm	Spot	Position	1	S100B+	DAPI+	242
61638.8	41485.4	11.7348	µm	Spot	Position	1	S100B+	DAPI+	248
61693.8	41482.1	11.371	µm	Spot	Position	1	S100B+	DAPI+	251
61689.3	41482.5	11.5811	µm	Spot	Position	1	S100B+	DAPI+	257
61703	41483.9	11.7689	µm	Spot	Position	1	S100B+	DAPI+	259
61747.8	41498.8	11.3014	µm	Spot	Position	1	S100B+	DAPI+	262
61742.2	41493.9	11.5794	µm	Spot	Position	1	S100B+	DAPI+	264
61766.9	41507.2	11.2904	µm	Spot	Position	1	S100B+	DAPI+	265
61448.4	41560.3	11.2973	µm	Spot	Position	1	S100B+	DAPI+	269
61449.8	41560.8	11.1293	µm	Spot	Position	1	S100B+	DAPI+	270
61482.8	41547.7	11.5408	µm	Spot	Position	1	S100B+	DAPI+	271
61528.2	41546	11.3399	µm	Spot	Position	1	S100B+	DAPI+	275
61488.2	41544.2	11.6937	µm	Spot	Position	1	S100B+	DAPI+	277
61507.4	41545.9	11.5157	µm	Spot	Position	1	S100B+	DAPI+	278
61539.4	41532	11.0035	µm	Spot	Position	1	S100B+	DAPI+	280
61540.9	41533.3	11.2951	µm	Spot	Position	1	S100B+	DAPI+	282
61568.4	41524.3	11.66	µm	Spot	Position	1	S100B+	DAPI+	283
61569.7	41526.3	11.4593	µm	Spot	Position	1	S100B+	DAPI+	284
61571.2	41528.8	11.5835	µm	Spot	Position	1	S100B+	DAPI+	285
61572.5	41522.9	11.9329	µm	Spot	Position	1	S100B+	DAPI+	286
61578.5	41526.1	12.0079	µm	Spot	Position	1	S100B+	DAPI+	287
61542.4	41527.2	11.8477	µm	Spot	Position	1	S100B+	DAPI+	288
61538.1	41529.1	11.8074	µm	Spot	Position	1	S100B+	DAPI+	289
61551.9	41533.4	11.989	µm	Spot	Position	1	S100B+	DAPI+	290
61586.7	41523.2	11.4403	µm	Spot	Position	1	S100B+	DAPI+	291
61585.3	41526.7	11.7011	µm	Spot	Position	1	S100B+	DAPI+	292
61581.6	41525.1	11.9486	µm	Spot	Position	1	S100B+	DAPI+	293
61792.3	41527.6	11.7742	µm	Spot	Position	1	S100B+	DAPI+	297
61812.9	41538.7	11.5293	µm	Spot	Position	1	S100B+	DAPI+	298
61431.3	41569.5	11.0758	µm	Spot	Position	1	S100B+	DAPI+	299
61400.6	41588.2	11.1431	µm	Spot	Position	1	S100B+	DAPI+	301
61419	41572.9	11.4724	µm	Spot	Position	1	S100B+	DAPI+	302
61421.4	41575.1	11.6968	µm	Spot	Position	1	S100B+	DAPI+	303
61415	41571.5	11.8648	µm	Spot	Position	1	S100B+	DAPI+	304
61416.9	41576.2	11.8228	µm	Spot	Position	1	S100B+	DAPI+	305
61402.3	41581.4	11.7329	µm	Spot	Position	1	S100B+	DAPI+	306
61302.2	41633.6	11.4074	µm	Spot	Position	1	S100B+	DAPI+	308
61289.9	41642.8	11.4174	µm	Spot	Position	1	S100B+	DAPI+	309
61309	41628.5	11.1946	µm	Spot	Position	1	S100B+	DAPI+	310
61892.5	41626.5	10.904	µm	Spot	Position	1	S100B+	DAPI+	312
61873.7	41630.3	10.986	µm	Spot	Position	1	S100B+	DAPI+	313
61872.8	41626.7	11.2302	µm	Spot	Position	1	S100B+	DAPI+	315
61878.1	41626.9	11.562	µm	Spot	Position	1	S100B+	DAPI+	317
61889.3	41622	11.7303	µm	Spot	Position	1	S100B+	DAPI+	318
61663.5	41461	12.3052	µm	Spot	Position	1	S100B+	DAPI+	321
61663.7	41471.5	12.2742	µm	Spot	Position	1	S100B+	DAPI+	322
61666.7	41437	12.4279	µm	Spot	Position	1	S100B+	DAPI+	323
61669	41441.4	12.5785	µm	Spot	Position	1	S100B+	DAPI+	324
61670	41454.5	12.4518	µm	Spot	Position	1	S100B+	DAPI+	326
61662	41463.2	12.477	µm	Spot	Position	1	S100B+	DAPI+	327
61661.9	41471.2	12.6082	µm	Spot	Position	1	S100B+	DAPI+	328
61665.1	41436.2	12.7041	µm	Spot	Position	1	S100B+	DAPI+	330
61665.8	41455.4	12.8469	µm	Spot	Position	1	S100B+	DAPI+	332
61662.6	41458.6	12.7214	µm	Spot	Position	1	S100B+	DAPI+	333
61667.8	41444.2	13.1039	µm	Spot	Position	1	S100B+	DAPI+	334
61669	41463.2	13.0632	µm	Spot	Position	1	S100B+	DAPI+	335
61693.1	41435.1	12.2926	µm	Spot	Position	1	S100B+	DAPI+	336
61707	41463.5	12.2098	µm	Spot	Position	1	S100B+	DAPI+	337
61675.5	41465.6	12.7674	µm	Spot	Position	1	S100B+	DAPI+	340
61710.1	41470.1	12.7291	µm	Spot	Position	1	S100B+	DAPI+	341
61691.4	41431.5	12.9949	µm	Spot	Position	1	S100B+	DAPI+	342
61683.9	41432.5	13.1691	µm	Spot	Position	1	S100B+	DAPI+	343
61675.9	41448.6	13.0103	µm	Spot	Position	1	S100B+	DAPI+	345
61674.7	41463.6	12.9725	µm	Spot	Position	1	S100B+	DAPI+	346
61690.4	41467	13.1194	µm	Spot	Position	1	S100B+	DAPI+	347
61567.9	41516.6	12.6258	µm	Spot	Position	1	S100B+	DAPI+	349
61579	41513.6	13.041	µm	Spot	Position	1	S100B+	DAPI+	350
61616.3	41505.3	12.0694	µm	Spot	Position	1	S100B+	DAPI+	351
61624.4	41493.7	12.4163	µm	Spot	Position	1	S100B+	DAPI+	352
61613.8	41494.3	12.7332	µm	Spot	Position	1	S100B+	DAPI+	353
61583.7	41510.5	12.7395	µm	Spot	Position	1	S100B+	DAPI+	354
61585	41516.1	12.8056	µm	Spot	Position	1	S100B+	DAPI+	355
61611.3	41499.5	13.0951	µm	Spot	Position	1	S100B+	DAPI+	357
61603.9	41500.9	13.0947	µm	Spot	Position	1	S100B+	DAPI+	358
61595	41504.6	13.0461	µm	Spot	Position	1	S100B+	DAPI+	359
61594.2	41510.3	13.0976	µm	Spot	Position	1	S100B+	DAPI+	360
61664.5	41474.8	12.143	µm	Spot	Position	1	S100B+	DAPI+	361
61635.7	41496	12.1911	µm	Spot	Position	1	S100B+	DAPI+	362
61631.4	41487.3	12.3826	µm	Spot	Position	1	S100B+	DAPI+	363
61629.1	41497.1	12.3174	µm	Spot	Position	1	S100B+	DAPI+	364
61666.9	41472.1	12.7688	µm	Spot	Position	1	S100B+	DAPI+	366
61633.4	41487	12.6995	µm	Spot	Position	1	S100B+	DAPI+	367
61640	41477.7	13.2033	µm	Spot	Position	1	S100B+	DAPI+	368
61641.3	41487.4	13.1991	µm	Spot	Position	1	S100B+	DAPI+	369
61697.3	41487.3	12.0417	µm	Spot	Position	1	S100B+	DAPI+	370
61680.9	41492.5	12.8102	µm	Spot	Position	1	S100B+	DAPI+	373
61692.2	41497.9	12.8521	µm	Spot	Position	1	S100B+	DAPI+	375
61674.2	41484.1	12.9868	µm	Spot	Position	1	S100B+	DAPI+	376
61723.7	41482.8	12.0529	µm	Spot	Position	1	S100B+	DAPI+	379
61745.5	41496.7	12.2908	µm	Spot	Position	1	S100B+	DAPI+	380
61719.3	41478.1	12.7319	µm	Spot	Position	1	S100B+	DAPI+	387
61486.7	41545	12.3769	µm	Spot	Position	1	S100B+	DAPI+	393
61454.3	41555.5	12.5962	µm	Spot	Position	1	S100B+	DAPI+	394
61488.9	41542.9	12.1207	µm	Spot	Position	1	S100B+	DAPI+	395
61518.1	41535.5	12.4977	µm	Spot	Position	1	S100B+	DAPI+	396
61506.8	41535.9	12.4503	µm	Spot	Position	1	S100B+	DAPI+	397
61529.4	41532.6	12.9074	µm	Spot	Position	1	S100B+	DAPI+	399
61514.6	41535.9	12.7159	µm	Spot	Position	1	S100B+	DAPI+	400
61513	41539.8	12.9236	µm	Spot	Position	1	S100B+	DAPI+	401
61557.3	41520.7	12.4211	µm	Spot	Position	1	S100B+	DAPI+	402
61566.2	41529.3	12.4168	µm	Spot	Position	1	S100B+	DAPI+	403
61566.4	41522.9	12.6205	µm	Spot	Position	1	S100B+	DAPI+	404
61560.7	41523.8	12.8192	µm	Spot	Position	1	S100B+	DAPI+	405
61551.9	41525.3	12.7504	µm	Spot	Position	1	S100B+	DAPI+	406
61570.8	41518.4	13.0049	µm	Spot	Position	1	S100B+	DAPI+	407
61600.1	41519.1	12.2321	µm	Spot	Position	1	S100B+	DAPI+	409
61583.5	41523.5	12.2918	µm	Spot	Position	1	S100B+	DAPI+	410
61778.3	41523.3	12.3619	µm	Spot	Position	1	S100B+	DAPI+	416
61795.1	41540.1	12.587	µm	Spot	Position	1	S100B+	DAPI+	417
61803.7	41545.7	12.7932	µm	Spot	Position	1	S100B+	DAPI+	419
61778	41521.5	13.0568	µm	Spot	Position	1	S100B+	DAPI+	422
61429.3	41568.9	12.1623	µm	Spot	Position	1	S100B+	DAPI+	425
61401.8	41579.8	12.537	µm	Spot	Position	1	S100B+	DAPI+	426
61667	41421.1	13.5022	µm	Spot	Position	1	S100B+	DAPI+	428
61660.1	41422.6	13.4603	µm	Spot	Position	1	S100B+	DAPI+	429
61661.7	41423.4	13.8922	µm	Spot	Position	1	S100B+	DAPI+	430
61660.3	41425.2	14.3661	µm	Spot	Position	1	S100B+	DAPI+	431
61664.3	41441.3	13.2183	µm	Spot	Position	1	S100B+	DAPI+	436
61664.2	41448.4	13.7984	µm	Spot	Position	1	S100B+	DAPI+	437
61657.2	41458.5	13.6882	µm	Spot	Position	1	S100B+	DAPI+	439
61672.1	41459.2	13.6301	µm	Spot	Position	1	S100B+	DAPI+	440
61671.3	41462.8	13.6025	µm	Spot	Position	1	S100B+	DAPI+	441
61649.4	41466.6	13.6646	µm	Spot	Position	1	S100B+	DAPI+	442
61663.1	41467.6	13.6881	µm	Spot	Position	1	S100B+	DAPI+	443
61661.6	41468	13.6684	µm	Spot	Position	1	S100B+	DAPI+	444
61656	41427.1	13.953	µm	Spot	Position	1	S100B+	DAPI+	445
61671.8	41430	13.9334	µm	Spot	Position	1	S100B+	DAPI+	446
61663.6	41431	14.0713	µm	Spot	Position	1	S100B+	DAPI+	447
61665.1	41439.2	13.8716	µm	Spot	Position	1	S100B+	DAPI+	448
61671	41445.5	13.8268	µm	Spot	Position	1	S100B+	DAPI+	449
61658.7	41457	13.9306	µm	Spot	Position	1	S100B+	DAPI+	452
61655.5	41436.1	14.1228	µm	Spot	Position	1	S100B+	DAPI+	453
61697	41439.7	13.281	µm	Spot	Position	1	S100B+	DAPI+	455
61676.9	41444.5	13.4672	µm	Spot	Position	1	S100B+	DAPI+	457
61672.4	41433.4	13.9437	µm	Spot	Position	1	S100B+	DAPI+	461
61673.4	41428	14.1449	µm	Spot	Position	1	S100B+	DAPI+	463
61674.9	41445.7	14.392	µm	Spot	Position	1	S100B+	DAPI+	464
61571.4	41517.4	13.2511	µm	Spot	Position	1	S100B+	DAPI+	465
61576.9	41513.9	13.6328	µm	Spot	Position	1	S100B+	DAPI+	466
61606.1	41499.1	13.3913	µm	Spot	Position	1	S100B+	DAPI+	467
61650.2	41482	13.6816	µm	Spot	Position	1	S100B+	DAPI+	468
61635.2	41482.1	14.0362	µm	Spot	Position	1	S100B+	DAPI+	470
61645.8	41479.4	14.2038	µm	Spot	Position	1	S100B+	DAPI+	471
61691	41481.8	13.406	µm	Spot	Position	1	S100B+	DAPI+	472
61697.5	41485.2	13.5232	µm	Spot	Position	1	S100B+	DAPI+	474
61484.9	41544.5	13.4496	µm	Spot	Position	1	S100B+	DAPI+	486
61516.8	41534.2	13.3901	µm	Spot	Position	1	S100B+	DAPI+	488
61504.9	41536.7	13.3131	µm	Spot	Position	1	S100B+	DAPI+	489
61490.7	41540.7	13.7144	µm	Spot	Position	1	S100B+	DAPI+	490
61557.4	41523.7	13.4183	µm	Spot	Position	1	S100B+	DAPI+	491
61772.5	41522.8	13.5605	µm	Spot	Position	1	S100B+	DAPI+	493
61792.9	41539.6	13.709	µm	Spot	Position	1	S100B+	DAPI+	494
61658.7	41449.3	14.639	µm	Spot	Position	1	S100B+	DAPI+	500
61659	41468.4	14.5729	µm	Spot	Position	1	S100B+	DAPI+	501
61655.3	41471.2	14.5276	µm	Spot	Position	1	S100B+	DAPI+	502
61647.5	41463.8	14.9892	µm	Spot	Position	1	S100B+	DAPI+	503
61657.2	41442.9	15.6001	µm	Spot	Position	1	S100B+	DAPI+	504
61654.2	41466.6	15.3544	µm	Spot	Position	1	S100B+	DAPI+	505
61673.8	41444.2	14.4356	µm	Spot	Position	1	S100B+	DAPI+	506
61673.1	41447.5	14.6841	µm	Spot	Position	1	S100B+	DAPI+	507
61639.6	41475.2	14.6987	µm	Spot	Position	1	S100B+	DAPI+	508
61637	41480	14.8029	µm	Spot	Position	1	S100B+	DAPI+	509
61651.2	41428	16.1213	µm	Spot	Position	1	S100B+	DAPI+	510
61643.7	41465.6	16.4268	µm	Spot	Position	1	S100B+	DAPI+	512
60834.3	41856.3	0.1501	µm	Spot	Position	1	S100B-	DAPI+	1
60852.1	41858.3	0.1501	µm	Spot	Position	1	S100B-	DAPI+	2
60903.8	41849.3	0.837264	µm	Spot	Position	1	S100B-	DAPI+	3
60839.9	41820.3	1.33455	µm	Spot	Position	1	S100B-	DAPI+	6
60835.1	41834	2.19421	µm	Spot	Position	1	S100B-	DAPI+	7
60861.4	41866.4	1.30171	µm	Spot	Position	1	S100B-	DAPI+	11
60913.2	41855.2	1.59967	µm	Spot	Position	1	S100B-	DAPI+	14
60903.4	41845.8	2.63183	µm	Spot	Position	1	S100B-	DAPI+	29
60894.9	41869	3.04564	µm	Spot	Position	1	S100B-	DAPI+	30
61107	41782.7	4.78235	µm	Spot	Position	1	S100B-	DAPI+	34
[truncated: 75 more rows]

## Sheet: Sample 2-Urah+S100b-Position - 
AC338 Urah 555S100b 488_R_[ii22_TileScan_3_Merged_Image_23]_Position
[truncated: 1,112 more rows]

[truncated: 10 more sheets: Sample 3-Urah+S100b-Position - , Sample 1 Crym+S100b-V-SVZ Dista, Sample 2 Crym+S100b-V-SVZ Dista, Sample 3 Crym+S100b-V-SVZ Dista, Sample 1 Dio2+S100b-V-SVZ Dista, Sample 2 Dio2+S100b-V-SVZ Dista, Sample 3 Dio2+S100b-V-SVZ Dista, Sample 1 Urah+S100b-V-SVZ Dista, Sample 2 Urah+S100b-V-SVZ Dista, Sample 3 Urah+S100b-V-SVZ Dista]
