# Supplementary material for: Single-cell analysis of the ventricular-subventricular zone reveals signatures of dorsal and ventral adult neurogenesis
Source: eLife. 2021 Jul 14;10:e67436. doi: 10.7554/eLife.67436 (PMC8443251; doi:10.7554/eLife.67436)
Supplement: Figure 4—source data 1. [file elife-67436-fig4-data1.xlsx]

## Sheet: Crym+ B1 cell quantifications w
Table 1
Sample	Region	% Crym positive GFP positive contacting LV (B1 cells)
Whole mount 1	Dorsal	3,35			Average	SD
Whole mount 2	Dorsal	4,66		Dorsal	4,71	1,38
Whole mount 3	Dorsal	6,12		Ventral	95,11	2,65	t-test Dorsal Vs ventral	0,0000007942561865
Whole mount 1	Ventral	95,76
Whole mount 2	Ventral	92,19
Whole mount 3	Ventral	97,37

## Sheet: CRYM+GFP+ quantifications in co
Table 1
Sample (mouse)	Region	% GFP+CRYM+ cells (B cells) in the V-SVZ		Average	SD
1	Dorsal	3,90		Dorsal	2,47
2	Dorsal	1,45		Ventral	97,67				0,0000007942561865
3	Dorsal	0,00				t-test Dorsal Vs ventral	0,000000006544039499
4	Dorsal	4,55
1	Ventral	92,47
2	Ventral	100,00
3	Ventral	99,02
4	Ventral	99,20
