# Supplementary material for: Single-cell analysis of the ventricular-subventricular zone reveals signatures of dorsal and ventral adult neurogenesis
Source: eLife. 2021 Jul 14;10:e67436. doi: 10.7554/eLife.67436 (PMC8443251; doi:10.7554/eLife.67436)
Supplement: Figure 6—source data 1. [file elife-67436-fig6-data1.xlsx]

## Sheet: Summary worksheet - Figure 6 Pa
Figure 6 Panels M, N, T and U raw data. (These files were used as input data to R)
	RNAscope probe	Sample (mouse)	Figure 6 panel	Data
Spots tool:
Sample 1-Rlbp1+DCX_Position	Rlbp1	1	M, N	Spots/ Position
Sample 2-Rlbp1+DCX_Position	Rlbp1	2	M, N	Spots/ Position
Sample 3-Rlbp1+DCX_Position	Rlbp1	3	M, N	Spots/ Position
Sample 1-Slit2+DCX_Position	Slit2	1	T, U	Spots/ Position
Sample 2-Slit2+DCX_Position	Slit2	2	T, U	Spots/ Position
Sample 3-Slit2+DCX_Position	Slit2	3	T, U	Spots/ Position
Measurement tool:
Sample 1 Rlbp1+DCX V-SVZ Distance Position	Rlbp1	1	M, N	Coordinates for way points for V-SVZ reference line
Sample 2 Rlbp1+DCX V-SVZ Distance Position	Rlbp1	2	M, N	Coordinates for way points for V-SVZ reference line
Sample 3 Rlbp1+DCX V-SVZ Distance Position	Rlbp1	3	M, N	Coordinates for way points for V-SVZ reference line
Sample 1-Slit2+DCX_Position	Slit2	1	T, U	Coordinates for way points for V-SVZ reference line
Sample 2-Slit2+DCX_Position	Slit2	2	T, U	Coordinates for way points for V-SVZ reference line
Sample 3-Slit2+DCX_Position	Slit2	3	T, U	Coordinates for way points for V-SVZ reference line

## Sheet: Sample 1-Rlbp1+DCX_Position - A
AC335 Rlbp1 555S Dcx 488_R_[ii17_TileScan_1_Merged_Image_18]_Position
Position
====================
Position X	Position Y	Position Z	Unit	Category	Collection	Time	DCX	dapi	ID
55318.7	43545.5	0.1501	µm	Spot	Position	1		DAPI-	16
55313.4	43566.9	0.1501	µm	Spot	Position	1		DAPI-	19
54956.3	43483.2	3.54399	µm	Spot	Position	1		DAPI-	75
55071.6	43422.8	3.8054	µm	Spot	Position	1		DAPI-	110
55113.7	43374.2	4.3745	µm	Spot	Position	1		DAPI-	128
55096.3	43422.7	4.3325	µm	Spot	Position	1		DAPI-	135
54996.3	43463.4	4.42976	µm	Spot	Position	1		DAPI-	181
54911.2	43509	3.79897	µm	Spot	Position	1		DAPI-	229
54921.6	43497.6	4.03078	µm	Spot	Position	1		DAPI-	230
54950.1	43490.2	3.71147	µm	Spot	Position	1		DAPI-	239
54934.2	43500.5	4.09656	µm	Spot	Position	1		DAPI-	241
54949.7	43491.7	4.712	µm	Spot	Position	1		DAPI-	245
54802.9	43570	4.80287	µm	Spot	Position	1		DAPI-	254
54635.7	43674.9	4.30134	µm	Spot	Position	1		DAPI-	265
54695.2	43645.6	4.06462	µm	Spot	Position	1		DAPI-	266
55123.8	43370.8	5.14579	µm	Spot	Position	1		DAPI-	324
55043.6	43376.6	5.68931	µm	Spot	Position	1		DAPI-	348
55012.1	43451.6	4.99183	µm	Spot	Position	1		DAPI-	454
55202.7	43431.5	5.09229	µm	Spot	Position	1		DAPI-	521
54776.1	43578.5	5.86122	µm	Spot	Position	1		DAPI-	577
54766.9	43590.9	5.31787	µm	Spot	Position	1		DAPI-	582
54683.6	43653.9	5.0163	µm	Spot	Position	1		DAPI-	595
54616	43685.6	5.05066	µm	Spot	Position	1		DAPI-	598
54404.4	43840.9	5.27655	µm	Spot	Position	1		DAPI-	631
55198.7	43432.3	6.57229	µm	Spot	Position	1		DAPI-	714
55322.3	43590.8	0.1501	µm	Spot	Position	1	DCX+	DAPI+	26
55331.5	43606.3	0.33806	µm	Spot	Position	1	DCX+	DAPI+	30
55334.1	43609.3	0.449718	µm	Spot	Position	1	DCX+	DAPI+	31
55333.9	43634.9	0.1501	µm	Spot	Position	1	DCX+	DAPI+	35
55331.3	43632.8	0.324098	µm	Spot	Position	1	DCX+	DAPI+	37
55333.2	43636	0.939787	µm	Spot	Position	1	DCX+	DAPI+	39
55336	43613	1.34785	µm	Spot	Position	1	DCX+	DAPI+	51
55338.1	43629.7	1.57799	µm	Spot	Position	1	DCX+	DAPI+	54
55337.6	43626.2	1.8418	µm	Spot	Position	1	DCX+	DAPI+	56
55337.5	43610.7	2.27206	µm	Spot	Position	1	DCX+	DAPI+	57
55337	43633	1.25072	µm	Spot	Position	1	DCX+	DAPI+	59
55046.9	43400.3	3.38197	µm	Spot	Position	1	DCX+	DAPI+	66
54900.8	43511.8	3.59361	µm	Spot	Position	1	DCX+	DAPI+	74
54778.5	43579.9	3.52952	µm	Spot	Position	1	DCX+	DAPI+	81
55336.4	43619.6	2.45732	µm	Spot	Position	1	DCX+	DAPI+	82
55338.7	43624.3	2.80079	µm	Spot	Position	1	DCX+	DAPI+	83
54644.1	43672.6	3.44793	µm	Spot	Position	1	DCX+	DAPI+	84
55338.1	43631.8	2.62699	µm	Spot	Position	1	DCX+	DAPI+	85
55339.3	43632.6	2.72915	µm	Spot	Position	1	DCX+	DAPI+	86
55344	43634	2.94426	µm	Spot	Position	1	DCX+	DAPI+	87
55339.9	43635	3.48781	µm	Spot	Position	1	DCX+	DAPI+	91
55343.1	43650.9	3.5246	µm	Spot	Position	1	DCX+	DAPI+	92
55352.8	43685.2	3.50275	µm	Spot	Position	1	DCX+	DAPI+	102
55357.8	43693.8	3.45729	µm	Spot	Position	1	DCX+	DAPI+	105
55045.6	43393	3.91135	µm	Spot	Position	1	DCX+	DAPI+	111
55072.3	43413.3	4.3953	µm	Spot	Position	1	DCX+	DAPI+	118
55043.8	43400.3	4.71775	µm	Spot	Position	1	DCX+	DAPI+	122
55112.6	43376.9	4.11539	µm	Spot	Position	1	DCX+	DAPI+	125
55092.5	43397.9	4.4822	µm	Spot	Position	1	DCX+	DAPI+	133
55119.6	43379.5	4.73279	µm	Spot	Position	1	DCX+	DAPI+	138
55125.3	43385.1	4.50702	µm	Spot	Position	1	DCX+	DAPI+	140
55151.6	43408	4.0431	µm	Spot	Position	1	DCX+	DAPI+	145
55188.6	43420.8	4.13075	µm	Spot	Position	1	DCX+	DAPI+	149
55157.1	43406.3	4.31076	µm	Spot	Position	1	DCX+	DAPI+	151
55144.5	43396.5	4.55896	µm	Spot	Position	1	DCX+	DAPI+	157
55148.2	43410.6	4.61221	µm	Spot	Position	1	DCX+	DAPI+	159
55138.3	43422.7	4.65142	µm	Spot	Position	1	DCX+	DAPI+	165
55189.6	43418.9	4.20355	µm	Spot	Position	1	DCX+	DAPI+	170
54979.7	43469.5	4.77896	µm	Spot	Position	1	DCX+	DAPI+	172
55005.7	43451	4.60661	µm	Spot	Position	1	DCX+	DAPI+	186
55067	43433.8	4.37661	µm	Spot	Position	1	DCX+	DAPI+	201
55058.5	43428	4.73629	µm	Spot	Position	1	DCX+	DAPI+	203
55066.3	43428.8	4.62694	µm	Spot	Position	1	DCX+	DAPI+	206
55043.6	43447.8	4.62088	µm	Spot	Position	1	DCX+	DAPI+	211
55207	43426.6	4.49508	µm	Spot	Position	1	DCX+	DAPI+	217
55205.9	43428.8	4.7807	µm	Spot	Position	1	DCX+	DAPI+	222
54908.9	43509.4	4.50033	µm	Spot	Position	1	DCX+	DAPI+	233
54909.1	43512.1	4.46363	µm	Spot	Position	1	DCX+	DAPI+	234
54962.3	43479.3	4.25089	µm	Spot	Position	1	DCX+	DAPI+	242
54811.4	43563.9	4.09624	µm	Spot	Position	1	DCX+	DAPI+	251
54784.9	43579	4.78948	µm	Spot	Position	1	DCX+	DAPI+	255
54750.7	43603.9	4.67341	µm	Spot	Position	1	DCX+	DAPI+	259
54742.7	43606.1	4.7048	µm	Spot	Position	1	DCX+	DAPI+	260
55343.7	43632.2	3.78025	µm	Spot	Position	1	DCX+	DAPI+	268
55340.1	43633.5	3.98575	µm	Spot	Position	1	DCX+	DAPI+	269
55349.4	43676.8	3.75066	µm	Spot	Position	1	DCX+	DAPI+	275
55361.8	43717.1	3.82393	µm	Spot	Position	1	DCX+	DAPI+	292
55348.3	43686.2	4.085	µm	Spot	Position	1	DCX+	DAPI+	294
55349.1	43686.1	4.00638	µm	Spot	Position	1	DCX+	DAPI+	295
55354.5	43713.9	4.31067	µm	Spot	Position	1	DCX+	DAPI+	304
55363.3	43721.4	4.77725	µm	Spot	Position	1	DCX+	DAPI+	307
55093.9	43366.2	4.99619	µm	Spot	Position	1	DCX+	DAPI+	317
55051.8	43373.3	5.09587	µm	Spot	Position	1	DCX+	DAPI+	333
55056.7	43407.3	5.03337	µm	Spot	Position	1	DCX+	DAPI+	336
55054.4	43384.1	5.18515	µm	Spot	Position	1	DCX+	DAPI+	338
55055.3	43404.1	5.20177	µm	Spot	Position	1	DCX+	DAPI+	344
55037.8	43416.7	5.30703	µm	Spot	Position	1	DCX+	DAPI+	345
55079.7	43423.2	5.33473	µm	Spot	Position	1	DCX+	DAPI+	346
55051.5	43380.5	5.66231	µm	Spot	Position	1	DCX+	DAPI+	350
55059.9	43391.2	5.60532	µm	Spot	Position	1	DCX+	DAPI+	351
55067	43394.8	5.41846	µm	Spot	Position	1	DCX+	DAPI+	352
55056.7	43413.5	5.49003	µm	Spot	Position	1	DCX+	DAPI+	354
55078.6	43417.5	5.57366	µm	Spot	Position	1	DCX+	DAPI+	355
55067.1	43419.9	5.60633	µm	Spot	Position	1	DCX+	DAPI+	356
55056.2	43387.4	5.90142	µm	Spot	Position	1	DCX+	DAPI+	359
55083.3	43390.4	5.79285	µm	Spot	Position	1	DCX+	DAPI+	364
55065.2	43396.6	5.93061	µm	Spot	Position	1	DCX+	DAPI+	367
55087.7	43384.8	4.92846	µm	Spot	Position	1	DCX+	DAPI+	374
55115.6	43385.1	5.05943	µm	Spot	Position	1	DCX+	DAPI+	375
55137.3	43400.8	4.9936	µm	Spot	Position	1	DCX+	DAPI+	378
55096.9	43419.3	4.97155	µm	Spot	Position	1	DCX+	DAPI+	381
55115.4	43382.6	5.37834	µm	Spot	Position	1	DCX+	DAPI+	383
55123.8	43390.3	5.35128	µm	Spot	Position	1	DCX+	DAPI+	384
55127.9	43391	5.36342	µm	Spot	Position	1	DCX+	DAPI+	386
55106.9	43395	5.32429	µm	Spot	Position	1	DCX+	DAPI+	388
55134.9	43398.4	5.26207	µm	Spot	Position	1	DCX+	DAPI+	390
55105.8	43418.7	5.37935	µm	Spot	Position	1	DCX+	DAPI+	392
55106.3	43372.8	5.57492	µm	Spot	Position	1	DCX+	DAPI+	395
55100.7	43382.3	5.40945	µm	Spot	Position	1	DCX+	DAPI+	397
55128.1	43383.9	5.49585	µm	Spot	Position	1	DCX+	DAPI+	398
55122.9	43384.2	5.4047	µm	Spot	Position	1	DCX+	DAPI+	399
55120.4	43389.1	5.41188	µm	Spot	Position	1	DCX+	DAPI+	402
55100.1	43390.2	5.60877	µm	Spot	Position	1	DCX+	DAPI+	403
55130.4	43396.8	5.65853	µm	Spot	Position	1	DCX+	DAPI+	405
55096.4	43400.6	5.66978	µm	Spot	Position	1	DCX+	DAPI+	406
55095.4	43409.5	5.61685	µm	Spot	Position	1	DCX+	DAPI+	407
55134.5	43410.4	5.6818	µm	Spot	Position	1	DCX+	DAPI+	408
55126.4	43414.7	5.57443	µm	Spot	Position	1	DCX+	DAPI+	410
55086.6	43373.8	5.76467	µm	Spot	Position	1	DCX+	DAPI+	411
55129.8	43391.7	5.97745	µm	Spot	Position	1	DCX+	DAPI+	415
55137.3	43392.7	5.79773	µm	Spot	Position	1	DCX+	DAPI+	416
55096.6	43413.6	5.75818	µm	Spot	Position	1	DCX+	DAPI+	418
55109.2	43418.9	5.9284	µm	Spot	Position	1	DCX+	DAPI+	419
55154.3	43401.8	4.90474	µm	Spot	Position	1	DCX+	DAPI+	420
55179.1	43405.4	4.91446	µm	Spot	Position	1	DCX+	DAPI+	423
55177.6	43411.4	4.92603	µm	Spot	Position	1	DCX+	DAPI+	426
55180.4	43422.2	5.03184	µm	Spot	Position	1	DCX+	DAPI+	427
55150.9	43422.6	4.97106	µm	Spot	Position	1	DCX+	DAPI+	428
55151.6	43405.6	5.33451	µm	Spot	Position	1	DCX+	DAPI+	430
55144.5	43414.5	5.19946	µm	Spot	Position	1	DCX+	DAPI+	431
55175.2	43411.5	5.46012	µm	Spot	Position	1	DCX+	DAPI+	435
55160.8	43414.6	5.68979	µm	Spot	Position	1	DCX+	DAPI+	436
55161.9	43417	5.43988	µm	Spot	Position	1	DCX+	DAPI+	437
55155.1	43422.2	5.56634	µm	Spot	Position	1	DCX+	DAPI+	438
55152	43399.6	5.93685	µm	Spot	Position	1	DCX+	DAPI+	443
55166.5	43408.1	5.80808	µm	Spot	Position	1	DCX+	DAPI+	444
55141.3	43413.3	5.70616	µm	Spot	Position	1	DCX+	DAPI+	445
55162.1	43419.7	5.7415	µm	Spot	Position	1	DCX+	DAPI+	446
54977.6	43475.4	4.92351	µm	Spot	Position	1	DCX+	DAPI+	449
55027.3	43433.5	5.34481	µm	Spot	Position	1	DCX+	DAPI+	458
55019.9	43448.9	5.40279	µm	Spot	Position	1	DCX+	DAPI+	462
55008.3	43451.2	5.35342	µm	Spot	Position	1	DCX+	DAPI+	463
55011.9	43449.9	5.60173	µm	Spot	Position	1	DCX+	DAPI+	474
55078.1	43424	4.97546	µm	Spot	Position	1	DCX+	DAPI+	485
55057.2	43431.1	4.9932	µm	Spot	Position	1	DCX+	DAPI+	488
55045	43442	4.9271	µm	Spot	Position	1	DCX+	DAPI+	491
55047.7	43425.4	5.59945	µm	Spot	Position	1	DCX+	DAPI+	497
55059.5	43427.5	5.67417	µm	Spot	Position	1	DCX+	DAPI+	498
55040.9	43439.8	5.49401	µm	Spot	Position	1	DCX+	DAPI+	501
55040.1	43441.8	5.83039	µm	Spot	Position	1	DCX+	DAPI+	506
55181.6	43424.3	5.27221	µm	Spot	Position	1	DCX+	DAPI+	512
55195.1	43429.1	4.94063	µm	Spot	Position	1	DCX+	DAPI+	520
55198.8	43428.5	5.33703	µm	Spot	Position	1	DCX+	DAPI+	525
55201.9	43429.5	5.34235	µm	Spot	Position	1	DCX+	DAPI+	526
55209.9	43425.8	5.85891	µm	Spot	Position	1	DCX+	DAPI+	539
55203.9	43429.8	5.84604	µm	Spot	Position	1	DCX+	DAPI+	541
55215.7	43433.8	5.83453	µm	Spot	Position	1	DCX+	DAPI+	543
54903.5	43516	5.24233	µm	Spot	Position	1	DCX+	DAPI+	551
54910.4	43510.4	5.79355	µm	Spot	Position	1	DCX+	DAPI+	553
54909.6	43513.7	5.81043	µm	Spot	Position	1	DCX+	DAPI+	554
54943.1	43490	5.08235	µm	Spot	Position	1	DCX+	DAPI+	556
54964.9	43480.9	5.34022	µm	Spot	Position	1	DCX+	DAPI+	558
54965.7	43480	5.51879	µm	Spot	Position	1	DCX+	DAPI+	562
54963.4	43487	5.6576	µm	Spot	Position	1	DCX+	DAPI+	563
54965.1	43487.5	5.54351	µm	Spot	Position	1	DCX+	DAPI+	564
54803	43558.4	4.91173	µm	Spot	Position	1	DCX+	DAPI+	572
54797.1	43572.9	4.99129	µm	Spot	Position	1	DCX+	DAPI+	573
54805.9	43566.7	5.12091	µm	Spot	Position	1	DCX+	DAPI+	575
54780.5	43578.1	5.62664	µm	Spot	Position	1	DCX+	DAPI+	576
54860.1	43533.2	5.71817	µm	Spot	Position	1	DCX+	DAPI+	580
54731.3	43613.9	5.70212	µm	Spot	Position	1	DCX+	DAPI+	585
54738.3	43612	5.70395	µm	Spot	Position	1	DCX+	DAPI+	586
54636.6	43679.4	4.8788	µm	Spot	Position	1	DCX+	DAPI+	589
54646.9	43677.1	5.50485	µm	Spot	Position	1	DCX+	DAPI+	593
55352.9	43679.6	5.16817	µm	Spot	Position	1	DCX+	DAPI+	596
54606.3	43716.4	5.96262	µm	Spot	Position	1	DCX+	DAPI+	599
54633.7	43692.1	5.79895	µm	Spot	Position	1	DCX+	DAPI+	601
55356.8	43685.4	5.02411	µm	Spot	Position	1	DCX+	DAPI+	604
54294.7	43822.4	5.67336	µm	Spot	Position	1	DCX+	DAPI+	617
54318.7	43803.3	5.32415	µm	Spot	Position	1	DCX+	DAPI+	619
54310.2	43814.5	5.25414	µm	Spot	Position	1	DCX+	DAPI+	620
54331.9	43824.8	5.28128	µm	Spot	Position	1	DCX+	DAPI+	621
54311.3	43807.3	5.6632	µm	Spot	Position	1	DCX+	DAPI+	623
54367.8	43823.9	5.93129	µm	Spot	Position	1	DCX+	DAPI+	625
54387.4	43824.2	5.78477	µm	Spot	Position	1	DCX+	DAPI+	626
55029.4	43388.4	6.24168	µm	Spot	Position	1	DCX+	DAPI+	639
55032.8	43394.6	6.22439	µm	Spot	Position	1	DCX+	DAPI+	640
55056.2	43406.3	6.1625	µm	Spot	Position	1	DCX+	DAPI+	646
55053.3	43410	6.25336	µm	Spot	Position	1	DCX+	DAPI+	647
55039.9	43412.4	6.18269	µm	Spot	Position	1	DCX+	DAPI+	648
55037.5	43412.7	6.36413	µm	Spot	Position	1	DCX+	DAPI+	651
55076	43413.3	6.55824	µm	Spot	Position	1	DCX+	DAPI+	652
55116	43404.3	6.02793	µm	Spot	Position	1	DCX+	DAPI+	656
55137.2	43414	6.21461	µm	Spot	Position	1	DCX+	DAPI+	659
55101.6	43421.7	6.02496	µm	Spot	Position	1	DCX+	DAPI+	661
55135.3	43391.6	6.46355	µm	Spot	Position	1	DCX+	DAPI+	662
55089.3	43400.3	6.42774	µm	Spot	Position	1	DCX+	DAPI+	664
55124.6	43401.3	6.50484	µm	Spot	Position	1	DCX+	DAPI+	667
55098.5	43412.9	6.44026	µm	Spot	Position	1	DCX+	DAPI+	669
55115.6	43414	6.42913	µm	Spot	Position	1	DCX+	DAPI+	670
55087.9	43415.5	6.4323	µm	Spot	Position	1	DCX+	DAPI+	671
55091.3	43420	6.63441	µm	Spot	Position	1	DCX+	DAPI+	672
55140.5	43421.5	6.1578	µm	Spot	Position	1	DCX+	DAPI+	677
55162.1	43420.8	6.4693	µm	Spot	Position	1	DCX+	DAPI+	680
55193.3	43420.1	6.51177	µm	Spot	Position	1	DCX+	DAPI+	681
54966.9	43471.4	6.08912	µm	Spot	Position	1	DCX+	DAPI+	682
55019.6	43438.1	6.14457	µm	Spot	Position	1	DCX+	DAPI+	685
55018.5	43438.3	6.1927	µm	Spot	Position	1	DCX+	DAPI+	686
55064.6	43427.3	6.01655	µm	Spot	Position	1	DCX+	DAPI+	691
55058	43433.5	6.19123	µm	Spot	Position	1	DCX+	DAPI+	692
55045.2	43430.4	6.40093	µm	Spot	Position	1	DCX+	DAPI+	700
55202.3	43425.2	6.23503	µm	Spot	Position	1	DCX+	DAPI+	712
55229.2	43448.3	6.38086	µm	Spot	Position	1	DCX+	DAPI+	715
54939.1	43491.4	6.24013	µm	Spot	Position	1	DCX+	DAPI+	719
54940.2	43495.4	6.18007	µm	Spot	Position	1	DCX+	DAPI+	721
54855.1	43533.1	6.01784	µm	Spot	Position	1	DCX+	DAPI+	722
54657.4	43671.1	6.15145	µm	Spot	Position	1	DCX+	DAPI+	723
54651	43677.1	6.02558	µm	Spot	Position	1	DCX+	DAPI+	724
54598.3	43709	6.16675	µm	Spot	Position	1	DCX+	DAPI+	728
54581.3	43732.2	6.0938	µm	Spot	Position	1	DCX+	DAPI+	729
54590	43721.6	6.43455	µm	Spot	Position	1	DCX+	DAPI+	730
54619.1	43684.5	6.1203	µm	Spot	Position	1	DCX+	DAPI+	731
54549.3	43755.7	6.27194	µm	Spot	Position	1	DCX+	DAPI+	734
54567.5	43740.4	6.04623	µm	Spot	Position	1	DCX+	DAPI+	737
54311.5	43806.3	6.11883	µm	Spot	Position	1	DCX+	DAPI+	739
54316.6	43838.8	6.283	µm	Spot	Position	1	DCX+	DAPI+	740
54386.2	43835.6	6.18011	µm	Spot	Position	1	DCX+	DAPI+	743
55314	43535.4	0.1501	µm	Spot	Position	1	DCX-	DAPI+	13
55314.7	43544.3	0.1501	µm	Spot	Position	1	DCX-	DAPI+	15
55320.7	43567.7	0.1501	µm	Spot	Position	1	DCX-	DAPI+	20
55320.6	43567.6	1.141	µm	Spot	Position	1	DCX-	DAPI+	23
55321.6	43581	0.1501	µm	Spot	Position	1	DCX-	DAPI+	24
55314.6	43589.6	0.1501	µm	Spot	Position	1	DCX-	DAPI+	25
55324.5	43596.6	0.1501	µm	Spot	Position	1	DCX-	DAPI+	27
55326.3	43612.2	0.1501	µm	Spot	Position	1	DCX-	DAPI+	28
55334.2	43613.7	0.1501	µm	Spot	Position	1	DCX-	DAPI+	29
55321	43586.6	0.898089	µm	Spot	Position	1	DCX-	DAPI+	32
55335	43632.9	0.1501	µm	Spot	Position	1	DCX-	DAPI+	34
55336.1	43633.7	0.759479	µm	Spot	Position	1	DCX-	DAPI+	38
55315.7	43566.5	1.52048	µm	Spot	Position	1	DCX-	DAPI+	47
55320.7	43576.4	1.9474	µm	Spot	Position	1	DCX-	DAPI+	48
55318.1	43544.9	2.36587	µm	Spot	Position	1	DCX-	DAPI+	49
55312.7	43573.7	2.3479	µm	Spot	Position	1	DCX-	DAPI+	50
55327.4	43602.1	1.51194	µm	Spot	Position	1	DCX-	DAPI+	52
55332.7	43611.4	1.79708	µm	Spot	Position	1	DCX-	DAPI+	53
55331.7	43597.9	2.02632	µm	Spot	Position	1	DCX-	DAPI+	55
55340.3	43626.4	2.35869	µm	Spot	Position	1	DCX-	DAPI+	58
55337.8	43636	1.32644	µm	Spot	Position	1	DCX-	DAPI+	60
55049.4	43404.8	2.72167	µm	Spot	Position	1	DCX-	DAPI+	64
55044.1	43390	3.56597	µm	Spot	Position	1	DCX-	DAPI+	65
55076.3	43423.3	3.51655	µm	Spot	Position	1	DCX-	DAPI+	67
54983.2	43463.4	2.77579	µm	Spot	Position	1	DCX-	DAPI+	68
54988.8	43463	3.52803	µm	Spot	Position	1	DCX-	DAPI+	69
55073.3	43425.6	3.544	µm	Spot	Position	1	DCX-	DAPI+	70
54864.8	43527.7	3.39013	µm	Spot	Position	1	DCX-	DAPI+	73
55317	43565.2	2.72915	µm	Spot	Position	1	DCX-	DAPI+	79
55320	43564.1	3.4701	µm	Spot	Position	1	DCX-	DAPI+	80
55349.1	43671.7	2.99466	µm	Spot	Position	1	DCX-	DAPI+	95
55352.4	43684	2.87276	µm	Spot	Position	1	DCX-	DAPI+	101
55354.7	43692.2	3.45803	µm	Spot	Position	1	DCX-	DAPI+	103
55356	43692.6	3.54421	µm	Spot	Position	1	DCX-	DAPI+	104
54390	43831.4	3.49963	µm	Spot	Position	1	DCX-	DAPI+	106
54392.7	43834.6	3.50063	µm	Spot	Position	1	DCX-	DAPI+	107
55088.5	43369	4.69955	µm	Spot	Position	1	DCX-	DAPI+	108
55052.3	43408.1	3.76914	µm	Spot	Position	1	DCX-	DAPI+	109
55074.7	43419.4	4.06177	µm	Spot	Position	1	DCX-	DAPI+	112
55049.7	43383.4	4.45991	µm	Spot	Position	1	DCX-	DAPI+	113
55039.9	43385	4.22546	µm	Spot	Position	1	DCX-	DAPI+	114
55052.5	43401	4.45589	µm	Spot	Position	1	DCX-	DAPI+	115
55051.7	43405.6	4.40083	µm	Spot	Position	1	DCX-	DAPI+	116
55051.2	43406.8	4.44175	µm	Spot	Position	1	DCX-	DAPI+	117
55050.5	43384.9	4.53001	µm	Spot	Position	1	DCX-	DAPI+	119
55044.8	43388	4.738	µm	Spot	Position	1	DCX-	DAPI+	120
55048.2	43393.2	4.69032	µm	Spot	Position	1	DCX-	DAPI+	121
55051.2	43412.2	4.78702	µm	Spot	Position	1	DCX-	DAPI+	123
55075.9	43419.2	4.5874	µm	Spot	Position	1	DCX-	DAPI+	124
55097.9	43418.3	4.15769	µm	Spot	Position	1	DCX-	DAPI+	126
55126.5	43373.7	4.43781	µm	Spot	Position	1	DCX-	DAPI+	127
55101.1	43378.7	4.35176	µm	Spot	Position	1	DCX-	DAPI+	129
55098.7	43381.1	4.45112	µm	Spot	Position	1	DCX-	DAPI+	130
55091.6	43382	4.3878	µm	Spot	Position	1	DCX-	DAPI+	131
55089.1	43383.1	4.48011	µm	Spot	Position	1	DCX-	DAPI+	132
55098.1	43420.9	4.38831	µm	Spot	Position	1	DCX-	DAPI+	134
55123.7	43378.2	4.53205	µm	Spot	Position	1	DCX-	DAPI+	137
55099	43384.3	4.60121	µm	Spot	Position	1	DCX-	DAPI+	139
55136.1	43385.5	4.73488	µm	Spot	Position	1	DCX-	DAPI+	141
55098.8	43418.1	4.57891	µm	Spot	Position	1	DCX-	DAPI+	142
55139.4	43418.6	3.82965	µm	Spot	Position	1	DCX-	DAPI+	143
55152.4	43403.9	4.0257	µm	Spot	Position	1	DCX-	DAPI+	144
55147.9	43408.5	4.15683	µm	Spot	Position	1	DCX-	DAPI+	146
55164.8	43409.7	4.09115	µm	Spot	Position	1	DCX-	DAPI+	147
55162.4	43413.4	4.13342	µm	Spot	Position	1	DCX-	DAPI+	148
55141.6	43393.9	4.33993	µm	Spot	Position	1	DCX-	DAPI+	150
55167.5	43406.7	4.34973	µm	Spot	Position	1	DCX-	DAPI+	152
55164.4	43416.7	4.4311	µm	Spot	Position	1	DCX-	DAPI+	153
55143.5	43417.7	4.38425	µm	Spot	Position	1	DCX-	DAPI+	154
55145.6	43391.1	4.7737	µm	Spot	Position	1	DCX-	DAPI+	155
55138.9	43392.7	4.63225	µm	Spot	Position	1	DCX-	DAPI+	156
55156	43398	4.73278	µm	Spot	Position	1	DCX-	DAPI+	158
55146.2	43412.3	4.79842	µm	Spot	Position	1	DCX-	DAPI+	161
55166.7	43412.3	4.77507	µm	Spot	Position	1	DCX-	DAPI+	162
55157.3	43412.7	4.52083	µm	Spot	Position	1	DCX-	DAPI+	163
55166.6	43418.3	4.65717	µm	Spot	Position	1	DCX-	DAPI+	164
55198.3	43421.6	3.96216	µm	Spot	Position	1	DCX-	DAPI+	168
54995.8	43458.2	3.89518	µm	Spot	Position	1	DCX-	DAPI+	173
54990.8	43461.9	3.77018	µm	Spot	Position	1	DCX-	DAPI+	174
54986	43462.1	3.79475	µm	Spot	Position	1	DCX-	DAPI+	175
55021.2	43447	4.10133	µm	Spot	Position	1	DCX-	DAPI+	176
54994.3	43459.5	4.11684	µm	Spot	Position	1	DCX-	DAPI+	177
55007	43441	4.43518	µm	Spot	Position	1	DCX-	DAPI+	178
55021.6	43442.2	4.42263	µm	Spot	Position	1	DCX-	DAPI+	179
55009.8	43443.6	4.38187	µm	Spot	Position	1	DCX-	DAPI+	180
55018.2	43434.4	4.58975	µm	Spot	Position	1	DCX-	DAPI+	182
55020.7	43434.8	4.6284	µm	Spot	Position	1	DCX-	DAPI+	183
55017.2	43444.3	4.67986	µm	Spot	Position	1	DCX-	DAPI+	184
55002.8	43449.3	4.7766	µm	Spot	Position	1	DCX-	DAPI+	185
54998.3	43458.3	4.59907	µm	Spot	Position	1	DCX-	DAPI+	187
54993.1	43459.8	4.76896	µm	Spot	Position	1	DCX-	DAPI+	188
54990	43463.3	4.72798	µm	Spot	Position	1	DCX-	DAPI+	189
55070.5	43425.2	3.7133	µm	Spot	Position	1	DCX-	DAPI+	191
55067.9	43425.9	3.83851	µm	Spot	Position	1	DCX-	DAPI+	192
55071.8	43428.1	3.86865	µm	Spot	Position	1	DCX-	DAPI+	193
55068.9	43428.4	3.69557	µm	Spot	Position	1	DCX-	DAPI+	194
55067.5	43424.2	3.99126	µm	Spot	Position	1	DCX-	DAPI+	195
55074	43426.9	4.07256	µm	Spot	Position	1	DCX-	DAPI+	196
55062.6	43430.4	4.09996	µm	Spot	Position	1	DCX-	DAPI+	197
55077	43426.3	4.3228	µm	Spot	Position	1	DCX-	DAPI+	198
55069.9	43430.6	4.24051	µm	Spot	Position	1	DCX-	DAPI+	199
55075.5	43426.9	4.54507	µm	Spot	Position	1	DCX-	DAPI+	202
55078.4	43428.3	4.67293	µm	Spot	Position	1	DCX-	DAPI+	204
55051.4	43428.5	4.65087	µm	Spot	Position	1	DCX-	DAPI+	205
55075.8	43429.3	4.53562	µm	Spot	Position	1	DCX-	DAPI+	207
55047.8	43435	4.51884	µm	Spot	Position	1	DCX-	DAPI+	209
55043.4	43443.1	4.57837	µm	Spot	Position	1	DCX-	DAPI+	210
55171.8	43427.9	3.60938	µm	Spot	Position	1	DCX-	DAPI+	212
55144.9	43424.6	4.48788	µm	Spot	Position	1	DCX-	DAPI+	213
55209.6	43428.5	4.38178	µm	Spot	Position	1	DCX-	DAPI+	218
55208	43429.4	4.29847	µm	Spot	Position	1	DCX-	DAPI+	219
55191.2	43424.8	4.57484	µm	Spot	Position	1	DCX-	DAPI+	220
55193.8	43426.5	4.6985	µm	Spot	Position	1	DCX-	DAPI+	221
54868.3	43524.9	3.67151	µm	Spot	Position	1	DCX-	DAPI+	227
54867.1	43524	4.70211	µm	Spot	Position	1	DCX-	DAPI+	228
54919.6	43504.3	4.05028	µm	Spot	Position	1	DCX-	DAPI+	231
54880.6	43521.3	4.08141	µm	Spot	Position	1	DCX-	DAPI+	232
54891.8	43517.1	4.44857	µm	Spot	Position	1	DCX-	DAPI+	235
54883	43519.5	4.2686	µm	Spot	Position	1	DCX-	DAPI+	236
54879.2	43520.6	4.4603	µm	Spot	Position	1	DCX-	DAPI+	237
54945.4	43490.2	3.71245	µm	Spot	Position	1	DCX-	DAPI+	238
54936.6	43492.9	3.93511	µm	Spot	Position	1	DCX-	DAPI+	240
54956.6	43486.9	4.29333	µm	Spot	Position	1	DCX-	DAPI+	243
54957.6	43489.3	4.70049	µm	Spot	Position	1	DCX-	DAPI+	244
54783.6	43576.9	3.79462	µm	Spot	Position	1	DCX-	DAPI+	249
54817.7	43557.4	4.00512	µm	Spot	Position	1	DCX-	DAPI+	250
54793.3	43573	4.0624	µm	Spot	Position	1	DCX-	DAPI+	252
54788.2	43575.9	4.37343	µm	Spot	Position	1	DCX-	DAPI+	253
54861.5	43530	4.58686	µm	Spot	Position	1	DCX-	DAPI+	256
54760.6	43595.1	4.16019	µm	Spot	Position	1	DCX-	DAPI+	257
54744.4	43604.7	4.21431	µm	Spot	Position	1	DCX-	DAPI+	258
54787.2	43579.9	4.76949	µm	Spot	Position	1	DCX-	DAPI+	261
54651.1	43668.4	3.70868	µm	Spot	Position	1	DCX-	DAPI+	262
54635.1	43682.1	3.63038	µm	Spot	Position	1	DCX-	DAPI+	263
54650.2	43672	4.08397	µm	Spot	Position	1	DCX-	DAPI+	264
54679.2	43657.2	4.39419	µm	Spot	Position	1	DCX-	DAPI+	267
55343.7	43647.7	3.95905	µm	Spot	Position	1	DCX-	DAPI+	270
55346.1	43673.3	3.68582	µm	Spot	Position	1	DCX-	DAPI+	274
55345.6	43678.1	3.89843	µm	Spot	Position	1	DCX-	DAPI+	276
55350.4	43684.8	3.84593	µm	Spot	Position	1	DCX-	DAPI+	285
55345.4	43693.5	3.90154	µm	Spot	Position	1	DCX-	DAPI+	289
55357.7	43708.9	3.67777	µm	Spot	Position	1	DCX-	DAPI+	290
55362.5	43719.5	4.08175	µm	Spot	Position	1	DCX-	DAPI+	298
55349.9	43686.5	4.39798	µm	Spot	Position	1	DCX-	DAPI+	299
55355.3	43720.8	4.47265	µm	Spot	Position	1	DCX-	DAPI+	305
54296.3	43806	4.48201	µm	Spot	Position	1	DCX-	DAPI+	308
54301.9	43815.5	4.35682	µm	Spot	Position	1	DCX-	DAPI+	309
54300.8	43827.8	4.69497	µm	Spot	Position	1	DCX-	DAPI+	310
54356.9	43819.1	4.70182	µm	Spot	Position	1	DCX-	DAPI+	311
54391.7	43829.1	4.14548	µm	Spot	Position	1	DCX-	DAPI+	312
55051.6	43369.5	4.95883	µm	Spot	Position	1	DCX-	DAPI+	313
55050.3	43368.4	5.37888	µm	Spot	Position	1	DCX-	DAPI+	315
55089.6	43365.7	5.78862	µm	Spot	Position	1	DCX-	DAPI+	328
55038.4	43384.5	5.05647	µm	Spot	Position	1	DCX-	DAPI+	334
55040.9	43387	4.92827	µm	Spot	Position	1	DCX-	DAPI+	335
55045.8	43377.1	5.24083	µm	Spot	Position	1	DCX-	DAPI+	337
55035.7	43384.7	5.19451	µm	Spot	Position	1	DCX-	DAPI+	339
55049.3	43386.1	5.31035	µm	Spot	Position	1	DCX-	DAPI+	340
55051.5	43386.8	5.35829	µm	Spot	Position	1	DCX-	DAPI+	341
55046.7	43387	5.32611	µm	Spot	Position	1	DCX-	DAPI+	342
55060.8	43393.1	5.2678	µm	Spot	Position	1	DCX-	DAPI+	343
55042.5	43375	5.63381	µm	Spot	Position	1	DCX-	DAPI+	347
55045.9	43378.6	5.42535	µm	Spot	Position	1	DCX-	DAPI+	349
55044.2	43411.8	5.55353	µm	Spot	Position	1	DCX-	DAPI+	353
55043.9	43379.9	5.87429	µm	Spot	Position	1	DCX-	DAPI+	357
55076.4	43380	5.86871	µm	Spot	Position	1	DCX-	DAPI+	358
55062.5	43388.3	5.89845	µm	Spot	Position	1	DCX-	DAPI+	360
55048.9	43388.9	5.84075	µm	Spot	Position	1	DCX-	DAPI+	361
55064.1	43388.8	5.80517	µm	Spot	Position	1	DCX-	DAPI+	362
55051.7	43389.9	5.72503	µm	Spot	Position	1	DCX-	DAPI+	363
55072.7	43390.8	5.75661	µm	Spot	Position	1	DCX-	DAPI+	365
55050.5	43392.2	5.90005	µm	Spot	Position	1	DCX-	DAPI+	366
55052.7	43396.7	5.82167	µm	Spot	Position	1	DCX-	DAPI+	368
55050.8	43397.6	5.82804	µm	Spot	Position	1	DCX-	DAPI+	369
55049.1	43398.3	5.93596	µm	Spot	Position	1	DCX-	DAPI+	370
55053.4	43398.6	5.95233	µm	Spot	Position	1	DCX-	DAPI+	371
55043.9	43408.7	5.90602	µm	Spot	Position	1	DCX-	DAPI+	372
55093.3	43384	4.88963	µm	Spot	Position	1	DCX-	DAPI+	373
55100.7	43387.3	4.84535	µm	Spot	Position	1	DCX-	DAPI+	376
55116.9	43389	4.94208	µm	Spot	Position	1	DCX-	DAPI+	377
55112.1	43405.9	5.0203	µm	Spot	Position	1	DCX-	DAPI+	379
55102.6	43416.5	4.85161	µm	Spot	Position	1	DCX-	DAPI+	380
55106.8	43422	4.99513	µm	Spot	Position	1	DCX-	DAPI+	382
55115.3	43390.7	5.1833	µm	Spot	Position	1	DCX-	DAPI+	385
55116.8	43393.5	5.21546	µm	Spot	Position	1	DCX-	DAPI+	387
55120.6	43395.4	5.16252	µm	Spot	Position	1	DCX-	DAPI+	389
55111.1	43415.4	5.2619	µm	Spot	Position	1	DCX-	DAPI+	391
55089.1	43375.8	5.69088	µm	Spot	Position	1	DCX-	DAPI+	396
55121.1	43384.7	5.62048	µm	Spot	Position	1	DCX-	DAPI+	400
55109.8	43389.1	5.49364	µm	Spot	Position	1	DCX-	DAPI+	401
55121.6	43392.5	5.48634	µm	Spot	Position	1	DCX-	DAPI+	404
55118.5	43414.1	5.59889	µm	Spot	Position	1	DCX-	DAPI+	409
55089.1	43377.7	5.84871	µm	Spot	Position	1	DCX-	DAPI+	412
55132.1	43382.2	5.74735	µm	Spot	Position	1	DCX-	DAPI+	413
55135.6	43387.1	5.97192	µm	Spot	Position	1	DCX-	DAPI+	414
55113.5	43411	5.9725	µm	Spot	Position	1	DCX-	DAPI+	417
55160.5	43402.8	4.96272	µm	Spot	Position	1	DCX-	DAPI+	421
55167.2	43403.6	5.0812	µm	Spot	Position	1	DCX-	DAPI+	422
55166.1	43411.4	5.04535	µm	Spot	Position	1	DCX-	DAPI+	425
55167.9	43419.4	5.39298	µm	Spot	Position	1	DCX-	DAPI+	432
55161.5	43407.1	5.42701	µm	Spot	Position	1	DCX-	DAPI+	434
55141.5	43391.1	5.8534	µm	Spot	Position	1	DCX-	DAPI+	441
55022.6	43437.5	5.09786	µm	Spot	Position	1	DCX-	DAPI+	450
55022.6	43440.6	4.83645	µm	Spot	Position	1	DCX-	DAPI+	451
55015.4	43447	4.88526	µm	Spot	Position	1	DCX-	DAPI+	453
54998.5	43456.1	4.95124	µm	Spot	Position	1	DCX-	DAPI+	455
55002.1	43457.3	4.92589	µm	Spot	Position	1	DCX-	DAPI+	456
54985.6	43469.2	4.82036	µm	Spot	Position	1	DCX-	DAPI+	457
55019.9	43442.5	5.22436	µm	Spot	Position	1	DCX-	DAPI+	459
55019	43444.2	5.32125	µm	Spot	Position	1	DCX-	DAPI+	460
55025.2	43447.4	5.28881	µm	Spot	Position	1	DCX-	DAPI+	461
54998.1	43472.8	5.3212	µm	Spot	Position	1	DCX-	DAPI+	465
55033.4	43426.8	5.51729	µm	Spot	Position	1	DCX-	DAPI+	466
55026.5	43431	5.44556	µm	Spot	Position	1	DCX-	DAPI+	467
55028.1	43436.7	5.514	µm	Spot	Position	1	DCX-	DAPI+	468
55012.1	43442.9	5.61159	µm	Spot	Position	1	DCX-	DAPI+	469
55007.6	43445.6	5.45464	µm	Spot	Position	1	DCX-	DAPI+	471
55015.5	43449.6	5.5122	µm	Spot	Position	1	DCX-	DAPI+	473
54986.3	43465.4	5.66359	µm	Spot	Position	1	DCX-	DAPI+	475
54997.7	43473.6	5.49049	µm	Spot	Position	1	DCX-	DAPI+	476
55027.6	43429.7	5.95845	µm	Spot	Position	1	DCX-	DAPI+	477
55011.9	43435	5.74196	µm	Spot	Position	1	DCX-	DAPI+	478
55011.2	43437.6	5.86802	µm	Spot	Position	1	DCX-	DAPI+	479
55026	43440.3	5.96531	µm	Spot	Position	1	DCX-	DAPI+	480
54983.5	43463.7	5.92453	µm	Spot	Position	1	DCX-	DAPI+	481
54981.9	43465.8	5.85429	µm	Spot	Position	1	DCX-	DAPI+	482
54987.6	43468.6	5.95482	µm	Spot	Position	1	DCX-	DAPI+	483
55079.9	43428.2	5.10157	µm	Spot	Position	1	DCX-	DAPI+	486
55071.4	43430.5	5.04991	µm	Spot	Position	1	DCX-	DAPI+	487
55047.9	43427.2	5.28729	µm	Spot	Position	1	DCX-	DAPI+	492
55058.5	43429.3	5.39851	µm	Spot	Position	1	DCX-	DAPI+	493
55062.1	43433.1	5.11	µm	Spot	Position	1	DCX-	DAPI+	494
55063.3	43434.8	5.25716	µm	Spot	Position	1	DCX-	DAPI+	495
55035.6	43431.5	5.60415	µm	Spot	Position	1	DCX-	DAPI+	499
55059.7	43432.7	5.65625	µm	Spot	Position	1	DCX-	DAPI+	500
55065.9	43434.5	5.72971	µm	Spot	Position	1	DCX-	DAPI+	503
55209.4	43426.6	4.83788	µm	Spot	Position	1	DCX-	DAPI+	519
55190.2	43429.9	5.38001	µm	Spot	Position	1	DCX-	DAPI+	527
55210.6	43430.8	5.33117	µm	Spot	Position	1	DCX-	DAPI+	528
55209.4	43428	5.85354	µm	Spot	Position	1	DCX-	DAPI+	540
54877.4	43525.5	5.37199	µm	Spot	Position	1	DCX-	DAPI+	549
54878.1	43526	4.83451	µm	Spot	Position	1	DCX-	DAPI+	550
54945.5	43488.9	4.93861	µm	Spot	Position	1	DCX-	DAPI+	555
54946.3	43491.4	5.38656	µm	Spot	Position	1	DCX-	DAPI+	559
54951.2	43487.2	5.93648	µm	Spot	Position	1	DCX-	DAPI+	567
54824.4	43548.8	5.13181	µm	Spot	Position	1	DCX-	DAPI+	574
54870.8	43528.8	4.8986	µm	Spot	Position	1	DCX-	DAPI+	578
54843.4	43535	5.02788	µm	Spot	Position	1	DCX-	DAPI+	579
54759.3	43596.9	5.65821	µm	Spot	Position	1	DCX-	DAPI+	583
54740.7	43607.8	5.4046	µm	Spot	Position	1	DCX-	DAPI+	584
54646.7	43672.3	4.80458	µm	Spot	Position	1	DCX-	DAPI+	587
54652.7	43666.9	5.33748	µm	Spot	Position	1	DCX-	DAPI+	590
54647.1	43669.7	5.12028	µm	Spot	Position	1	DCX-	DAPI+	591
54655.4	43664.7	5.61476	µm	Spot	Position	1	DCX-	DAPI+	592
54666.9	43664.6	5.86896	µm	Spot	Position	1	DCX-	DAPI+	594
55347.3	43683.2	5.17154	µm	Spot	Position	1	DCX-	DAPI+	597
55345.2	43684.7	4.94574	µm	Spot	Position	1	DCX-	DAPI+	602
55346.8	43693.8	5.00737	µm	Spot	Position	1	DCX-	DAPI+	606
55358.8	43722.1	4.95272	µm	Spot	Position	1	DCX-	DAPI+	609
54504.4	43777	5.5117	µm	Spot	Position	1	DCX-	DAPI+	612
54532.2	43758.6	5.20107	µm	Spot	Position	1	DCX-	DAPI+	613
54561.7	43749.1	5.981	µm	Spot	Position	1	DCX-	DAPI+	614
54562.1	43752.6	5.77422	µm	Spot	Position	1	DCX-	DAPI+	615
54529.8	43757.9	5.83261	µm	Spot	Position	1	DCX-	DAPI+	616
54348.6	43828.2	4.98627	µm	Spot	Position	1	DCX-	DAPI+	618
54347.9	43835.9	5.21802	µm	Spot	Position	1	DCX-	DAPI+	622
54365.2	43818.8	4.93492	µm	Spot	Position	1	DCX-	DAPI+	624
54384.4	43831.2	5.82307	µm	Spot	Position	1	DCX-	DAPI+	627
54368.3	43832.1	5.72973	µm	Spot	Position	1	DCX-	DAPI+	628
54387.9	43837.4	5.93873	µm	Spot	Position	1	DCX-	DAPI+	629
54457.8	43808.8	5.18411	µm	Spot	Position	1	DCX-	DAPI+	630
55028.8	43423.6	6.57644	µm	Spot	Position	1	DCX-	DAPI+	641
55042.4	43380.1	6.14618	µm	Spot	Position	1	DCX-	DAPI+	642
55065.2	43390.8	6.21224	µm	Spot	Position	1	DCX-	DAPI+	643
55050	43401.5	6.04741	µm	Spot	Position	1	DCX-	DAPI+	644
55079.8	43402.9	6.16162	µm	Spot	Position	1	DCX-	DAPI+	645
55039.6	43382.1	6.54447	µm	Spot	Position	1	DCX-	DAPI+	649
55069.3	43389.1	6.54134	µm	Spot	Position	1	DCX-	DAPI+	650
55068.7	43423.8	6.37505	µm	Spot	Position	1	DCX-	DAPI+	653
55127.4	43378.9	6.18892	µm	Spot	Position	1	DCX-	DAPI+	654
55136.7	43389.8	6.26715	µm	Spot	Position	1	DCX-	DAPI+	655
55121	43405.1	6.02956	µm	Spot	Position	1	DCX-	DAPI+	657
55118.1	43412.1	6.25002	µm	Spot	Position	1	DCX-	DAPI+	658
55130.3	43419	6.16908	µm	Spot	Position	1	DCX-	DAPI+	660
55099.6	43393.3	6.36732	µm	Spot	Position	1	DCX-	DAPI+	663
55121.9	43400.4	6.39823	µm	Spot	Position	1	DCX-	DAPI+	665
55111.8	43401	6.51633	µm	Spot	Position	1	DCX-	DAPI+	666
55115.9	43412.8	6.39338	µm	Spot	Position	1	DCX-	DAPI+	668
55155.9	43396	6.01778	µm	Spot	Position	1	DCX-	DAPI+	674
55175.4	43406.7	6.07265	µm	Spot	Position	1	DCX-	DAPI+	675
55155.1	43407.6	6.01045	µm	Spot	Position	1	DCX-	DAPI+	676
55150	43406.2	6.30727	µm	Spot	Position	1	DCX-	DAPI+	678
55156.5	43408.7	6.43131	µm	Spot	Position	1	DCX-	DAPI+	679
55029.6	43424.1	6.17686	µm	Spot	Position	1	DCX-	DAPI+	683
55025.4	43427.1	6.09974	µm	Spot	Position	1	DCX-	DAPI+	684
54993.1	43460.9	6.27378	µm	Spot	Position	1	DCX-	DAPI+	688
54997.2	43467.1	6.10999	µm	Spot	Position	1	DCX-	DAPI+	689
54996.2	43472.2	6.25856	µm	Spot	Position	1	DCX-	DAPI+	690
55084.5	43427.1	6.55658	µm	Spot	Position	1	DCX-	DAPI+	699
55061	43436.2	6.32164	µm	Spot	Position	1	DCX-	DAPI+	701
55171.2	43425.9	6.16798	µm	Spot	Position	1	DCX-	DAPI+	707
55230.6	43448.2	6.5785	µm	Spot	Position	1	DCX-	DAPI+	716
54953.9	43486.1	6.29997	µm	Spot	Position	1	DCX-	DAPI+	718
54938.6	43494.8	6.26249	µm	Spot	Position	1	DCX-	DAPI+	720
54645.3	43673.1	6.3917	µm	Spot	Position	1	DCX-	DAPI+	725
54614.8	43687.7	6.19211	µm	Spot	Position	1	DCX-	DAPI+	726
54615.6	43689.4	6.1876	µm	Spot	Position	1	DCX-	DAPI+	727
54504.7	43781.3	6.15715	µm	Spot	Position	1	DCX-	DAPI+	732
54564.9	43754.1	6.05218	µm	Spot	Position	1	DCX-	DAPI+	733
54528.1	43770.8	6.09989	µm	Spot	Position	1	DCX-	DAPI+	735
54525	43763.1	6.54449	µm	Spot	Position	1	DCX-	DAPI+	736
54300.6	43831.9	6.17614	µm	Spot	Position	1	DCX-	DAPI+	738
54353.2	43827.6	6.50295	µm	Spot	Position	1	DCX-	DAPI+	741
54365.4	43835.1	6.21375	µm	Spot	Position	1	DCX-	DAPI+	742
54375.4	43838.8	6.16878	µm	Spot	Position	1	DCX-	DAPI+	744
54471.4	43805.2	6.18465	µm	Spot	Position	1	DCX-	DAPI+	745

## Sheet: Sample 2-Rlbp1+DCX_Position - A
AC338 Rlbp1 555S Dcx 488_R_[ii20_TileScan_1_Merged_Image_21]_Position
Position
====================
Position X	Position Y	Position Z	Unit	Category	Collection	Time	DCX	dapi	ID
45563.4	44090.2	2.07404	µm	Spot	Position	1		DAPI-	32
45568.9	44147.4	2.35551	µm	Spot	Position	1		DAPI-	36
45681.7	44332.8	1.84	µm	Spot	Position	1		DAPI-	64
45646.4	44303.3	2.12008	µm	Spot	Position	1		DAPI-	65
45672.9	44327.9	2.26673	µm	Spot	Position	1		DAPI-	66
45703	44369.3	1.3968	µm	Spot	Position	1		DAPI-	72
45722.7	44375	2.37451	µm	Spot	Position	1		DAPI-	82
45753.8	44384.7	2.09009	µm	Spot	Position	1		DAPI-	84
45752.3	44383.7	2.29535	µm	Spot	Position	1		DAPI-	85
45801.8	44437.2	2.16896	µm	Spot	Position	1		DAPI-	91
45847.1	44462.5	2.38459	µm	Spot	Position	1		DAPI-	102
45667.9	43560.7	3.22976	µm	Spot	Position	1		DAPI-	130
45575.7	43979.2	2.78878	µm	Spot	Position	1		DAPI-	144
45580.2	44045.8	3.20054	µm	Spot	Position	1		DAPI-	146
45569.9	44149.6	3.22328	µm	Spot	Position	1		DAPI-	150
45560	44221.3	2.73249	µm	Spot	Position	1		DAPI-	162
45596.4	44265.5	2.71247	µm	Spot	Position	1		DAPI-	173
45638.7	44298.1	2.44382	µm	Spot	Position	1		DAPI-	185
45629.5	44312.9	3.09781	µm	Spot	Position	1		DAPI-	194
45672	44335.2	2.46982	µm	Spot	Position	1		DAPI-	205
45651.9	44305.6	3.54151	µm	Spot	Position	1		DAPI-	214
45657.9	44338.7	2.83352	µm	Spot	Position	1		DAPI-	227
45684.2	44363.5	3.42517	µm	Spot	Position	1		DAPI-	230
45691.5	44367.6	2.62531	µm	Spot	Position	1		DAPI-	233
45721.8	44382	3.06657	µm	Spot	Position	1		DAPI-	242
45749.1	44382	2.61945	µm	Spot	Position	1		DAPI-	250
45749.9	44391.1	3.00002	µm	Spot	Position	1		DAPI-	257
45771.1	44395.8	2.78801	µm	Spot	Position	1		DAPI-	258
45770.3	44412.5	2.80765	µm	Spot	Position	1		DAPI-	259
45844.5	44455.6	2.58311	µm	Spot	Position	1		DAPI-	270
45867.1	44466.2	3.51903	µm	Spot	Position	1		DAPI-	287
45994.7	44464.1	2.89016	µm	Spot	Position	1		DAPI-	317
46005.2	44472.7	3.03725	µm	Spot	Position	1		DAPI-	323
45976.5	44475.8	2.92134	µm	Spot	Position	1		DAPI-	343
45586.2	43985.8	4.01953	µm	Spot	Position	1		DAPI-	370
45569.9	44129.7	3.94044	µm	Spot	Position	1		DAPI-	380
45617.3	44310.1	3.63631	µm	Spot	Position	1		DAPI-	400
45655.3	44300.3	3.63444	µm	Spot	Position	1		DAPI-	406
45684.7	44362.6	4.29053	µm	Spot	Position	1		DAPI-	415
45755	44377.3	4.05416	µm	Spot	Position	1		DAPI-	424
45747.6	44396.2	3.81547	µm	Spot	Position	1		DAPI-	428
45871.9	44449.7	3.83787	µm	Spot	Position	1		DAPI-	457
45902	44474.2	3.9043	µm	Spot	Position	1		DAPI-	462
45942.1	44469.8	3.79746	µm	Spot	Position	1		DAPI-	467
45970	44458.8	4.06246	µm	Spot	Position	1		DAPI-	483
45732	43194	0.413567	µm	Spot	Position	1	DCX+	DAPI+	3
45689.4	43474.9	1.06103	µm	Spot	Position	1	DCX+	DAPI+	6
45676	44346.4	1.13329	µm	Spot	Position	1	DCX+	DAPI+	12
45769	44407.5	0.765932	µm	Spot	Position	1	DCX+	DAPI+	14
45685.5	43458.3	2.02417	µm	Spot	Position	1	DCX+	DAPI+	25
45656.3	43609.3	1.55536	µm	Spot	Position	1	DCX+	DAPI+	29
45638.6	43685.4	1.39739	µm	Spot	Position	1	DCX+	DAPI+	30
45563.6	44145	1.89953	µm	Spot	Position	1	DCX+	DAPI+	33
45579.5	44234.1	2.36751	µm	Spot	Position	1	DCX+	DAPI+	41
45626.2	44281.9	1.61805	µm	Spot	Position	1	DCX+	DAPI+	46
45624.1	44278.7	2.28143	µm	Spot	Position	1	DCX+	DAPI+	52
45625.6	44285.4	2.16852	µm	Spot	Position	1	DCX+	DAPI+	53
45632.6	44299.9	2.03466	µm	Spot	Position	1	DCX+	DAPI+	54
45635.2	44298.9	2.22929	µm	Spot	Position	1	DCX+	DAPI+	55
45672.5	44344	1.57294	µm	Spot	Position	1	DCX+	DAPI+	67
45681.6	44339.6	2.31634	µm	Spot	Position	1	DCX+	DAPI+	69
45678.2	44352.5	2.3257	µm	Spot	Position	1	DCX+	DAPI+	71
45712.2	44374.6	1.76672	µm	Spot	Position	1	DCX+	DAPI+	75
45702.2	44362.3	1.83012	µm	Spot	Position	1	DCX+	DAPI+	76
45706.4	44373.2	1.83338	µm	Spot	Position	1	DCX+	DAPI+	77
45699.1	44355	2.32952	µm	Spot	Position	1	DCX+	DAPI+	79
45714.2	44372.2	2.23098	µm	Spot	Position	1	DCX+	DAPI+	81
45755.9	44394.6	2.38741	µm	Spot	Position	1	DCX+	DAPI+	86
45765	44403.7	2.25649	µm	Spot	Position	1	DCX+	DAPI+	87
45782.6	44414	1.91535	µm	Spot	Position	1	DCX+	DAPI+	88
45816.2	44424.1	2.1145	µm	Spot	Position	1	DCX+	DAPI+	89
45805.6	44433.8	1.43671	µm	Spot	Position	1	DCX+	DAPI+	90
45819	44440.9	2.17578	µm	Spot	Position	1	DCX+	DAPI+	92
45826	44443.3	1.69252	µm	Spot	Position	1	DCX+	DAPI+	94
45829	44443.3	2.33879	µm	Spot	Position	1	DCX+	DAPI+	99
45945.3	44461.4	1.93961	µm	Spot	Position	1	DCX+	DAPI+	105
45960.2	44460.2	2.3035	µm	Spot	Position	1	DCX+	DAPI+	108
45739.6	43095.4	2.92242	µm	Spot	Position	1	DCX+	DAPI+	123
45565.3	44138.1	2.9741	µm	Spot	Position	1	DCX+	DAPI+	149
45574.3	44116.9	3.49692	µm	Spot	Position	1	DCX+	DAPI+	151
45581.8	44227.2	2.93008	µm	Spot	Position	1	DCX+	DAPI+	163
45607.6	44267.6	2.40649	µm	Spot	Position	1	DCX+	DAPI+	171
45606.3	44263.7	3.32139	µm	Spot	Position	1	DCX+	DAPI+	180
45636.2	44302.3	2.65886	µm	Spot	Position	1	DCX+	DAPI+	186
45631.8	44297.1	2.97871	µm	Spot	Position	1	DCX+	DAPI+	189
45636	44322	2.85879	µm	Spot	Position	1	DCX+	DAPI+	192
45637.9	44323	2.98276	µm	Spot	Position	1	DCX+	DAPI+	193
45647.6	44298.9	2.45715	µm	Spot	Position	1	DCX+	DAPI+	201
45651.3	44323.9	2.43488	µm	Spot	Position	1	DCX+	DAPI+	204
45650.3	44304.9	2.72311	µm	Spot	Position	1	DCX+	DAPI+	206
45656.2	44326.1	2.89534	µm	Spot	Position	1	DCX+	DAPI+	209
45641.4	44324.7	3.02221	µm	Spot	Position	1	DCX+	DAPI+	212
45641.6	44316.4	3.32405	µm	Spot	Position	1	DCX+	DAPI+	219
45682.8	44336.2	3.55485	µm	Spot	Position	1	DCX+	DAPI+	221
45668	44341.6	2.62622	µm	Spot	Position	1	DCX+	DAPI+	222
45677.3	44337.9	2.84866	µm	Spot	Position	1	DCX+	DAPI+	226
45728.1	44379.2	2.54919	µm	Spot	Position	1	DCX+	DAPI+	235
45689	44344.2	2.78105	µm	Spot	Position	1	DCX+	DAPI+	236
45718.5	44374.1	2.77516	µm	Spot	Position	1	DCX+	DAPI+	237
45716.1	44365.6	3.00716	µm	Spot	Position	1	DCX+	DAPI+	239
45730.4	44375.2	3.03624	µm	Spot	Position	1	DCX+	DAPI+	241
45714.7	44382.7	3.49363	µm	Spot	Position	1	DCX+	DAPI+	247
45750.6	44375.3	2.5073	µm	Spot	Position	1	DCX+	DAPI+	248
45736.8	44381.4	2.55221	µm	Spot	Position	1	DCX+	DAPI+	249
45743	44380.7	3.07618	µm	Spot	Position	1	DCX+	DAPI+	251
45727.7	44391.4	2.71726	µm	Spot	Position	1	DCX+	DAPI+	253
45770.4	44408.6	2.6005	µm	Spot	Position	1	DCX+	DAPI+	255
45756.8	44384.6	2.84814	µm	Spot	Position	1	DCX+	DAPI+	256
45738.3	44383.1	3.12751	µm	Spot	Position	1	DCX+	DAPI+	260
45752.6	44394.2	3.57761	µm	Spot	Position	1	DCX+	DAPI+	262
45780.3	44404.2	3.24241	µm	Spot	Position	1	DCX+	DAPI+	265
45822.7	44439.9	2.9125	µm	Spot	Position	1	DCX+	DAPI+	269
45848.1	44456.5	2.54541	µm	Spot	Position	1	DCX+	DAPI+	271
45849.5	44437.7	2.90061	µm	Spot	Position	1	DCX+	DAPI+	272
45846.9	44434.9	3.07742	µm	Spot	Position	1	DCX+	DAPI+	275
45835	44438.1	3.09676	µm	Spot	Position	1	DCX+	DAPI+	276
45827.6	44447.8	3.07722	µm	Spot	Position	1	DCX+	DAPI+	277
45867	44448.6	3.26793	µm	Spot	Position	1	DCX+	DAPI+	278
45865.8	44461.1	3.24436	µm	Spot	Position	1	DCX+	DAPI+	280
45843.1	44441.9	3.58029	µm	Spot	Position	1	DCX+	DAPI+	282
45849.5	44442.3	3.45679	µm	Spot	Position	1	DCX+	DAPI+	283
45863.4	44455.1	3.53417	µm	Spot	Position	1	DCX+	DAPI+	285
45879.2	44451.1	2.5	µm	Spot	Position	1	DCX+	DAPI+	288
45900.9	44455.7	2.8548	µm	Spot	Position	1	DCX+	DAPI+	289
45913.9	44468.1	2.74001	µm	Spot	Position	1	DCX+	DAPI+	290
45902.1	44455.9	3.23882	µm	Spot	Position	1	DCX+	DAPI+	292
45906.3	44468.6	3.56512	µm	Spot	Position	1	DCX+	DAPI+	298
45913.4	44474.3	3.33155	µm	Spot	Position	1	DCX+	DAPI+	300
45945.1	44463.9	2.66184	µm	Spot	Position	1	DCX+	DAPI+	302
45920.7	44472.9	2.55688	µm	Spot	Position	1	DCX+	DAPI+	303
45948.3	44468.8	2.86451	µm	Spot	Position	1	DCX+	DAPI+	305
45950.9	44469.8	2.91979	µm	Spot	Position	1	DCX+	DAPI+	306
45923.1	44472.9	2.91646	µm	Spot	Position	1	DCX+	DAPI+	307
45919.1	44465.1	3.11873	µm	Spot	Position	1	DCX+	DAPI+	308
45921.9	44472.9	3.00848	µm	Spot	Position	1	DCX+	DAPI+	312
45986.3	44473.5	2.65709	µm	Spot	Position	1	DCX+	DAPI+	315
46005.8	44461.3	2.84203	µm	Spot	Position	1	DCX+	DAPI+	316
45986.8	44467.6	2.72324	µm	Spot	Position	1	DCX+	DAPI+	318
45988.1	44457.7	3.44384	µm	Spot	Position	1	DCX+	DAPI+	324
45970.8	44467.4	3.36592	µm	Spot	Position	1	DCX+	DAPI+	326
45986.9	44474.4	3.55333	µm	Spot	Position	1	DCX+	DAPI+	327
45955	44482.8	2.68411	µm	Spot	Position	1	DCX+	DAPI+	338
45950.8	44481	3.47877	µm	Spot	Position	1	DCX+	DAPI+	341
45964.8	44475.7	2.8612	µm	Spot	Position	1	DCX+	DAPI+	342
45963.7	44478.1	2.9866	µm	Spot	Position	1	DCX+	DAPI+	344
45784.8	42894.6	3.6793	µm	Spot	Position	1	DCX+	DAPI+	351
45721	44367.4	3.87688	µm	Spot	Position	1	DCX+	DAPI+	416
45689.7	44339.5	3.92471	µm	Spot	Position	1	DCX+	DAPI+	417
45705.9	44359.6	4.42659	µm	Spot	Position	1	DCX+	DAPI+	421
45746.8	44381.2	3.62529	µm	Spot	Position	1	DCX+	DAPI+	423
45730.4	44390.7	3.92276	µm	Spot	Position	1	DCX+	DAPI+	425
45733.3	44390.6	3.72609	µm	Spot	Position	1	DCX+	DAPI+	427
45773	44413.1	3.98967	µm	Spot	Position	1	DCX+	DAPI+	433
45784.3	44406.7	3.78944	µm	Spot	Position	1	DCX+	DAPI+	434
45783	44401.2	4.08172	µm	Spot	Position	1	DCX+	DAPI+	437
45788	44413.3	3.93498	µm	Spot	Position	1	DCX+	DAPI+	438
45850.7	44435.8	3.84656	µm	Spot	Position	1	DCX+	DAPI+	448
45867.2	44455.8	3.91979	µm	Spot	Position	1	DCX+	DAPI+	452
45912.7	44462.2	3.81577	µm	Spot	Position	1	DCX+	DAPI+	459
45906.3	44466	3.74235	µm	Spot	Position	1	DCX+	DAPI+	460
45943.2	44457.3	3.86926	µm	Spot	Position	1	DCX+	DAPI+	466
45937.7	44473.6	3.99199	µm	Spot	Position	1	DCX+	DAPI+	473
45949.4	44458.6	4.38929	µm	Spot	Position	1	DCX+	DAPI+	474
45980.6	44454.4	3.7756	µm	Spot	Position	1	DCX+	DAPI+	476
45996.4	44459.4	3.76376	µm	Spot	Position	1	DCX+	DAPI+	478
45981.9	44475	3.87653	µm	Spot	Position	1	DCX+	DAPI+	480
45976.8	44456.1	4.13727	µm	Spot	Position	1	DCX+	DAPI+	482
45974.9	44454.8	4.34507	µm	Spot	Position	1	DCX+	DAPI+	486
45990.1	44468	4.22727	µm	Spot	Position	1	DCX+	DAPI+	488
45962.8	44477.6	3.80616	µm	Spot	Position	1	DCX+	DAPI+	503
45938.8	44477.7	3.70447	µm	Spot	Position	1	DCX+	DAPI+	504
45966.9	44485	4.36833	µm	Spot	Position	1	DCX+	DAPI+	508
45740	43065.6	0.984227	µm	Spot	Position	1	DCX-	DAPI+	2
45689.4	43474.9	0.1501	µm	Spot	Position	1	DCX-	DAPI+	5
45604	44259.4	0.1501	µm	Spot	Position	1	DCX-	DAPI+	8
45636.6	44319.3	0.1501	µm	Spot	Position	1	DCX-	DAPI+	10
45685.9	44352.2	0.1501	µm	Spot	Position	1	DCX-	DAPI+	11
45707.7	44369.1	0.1501	µm	Spot	Position	1	DCX-	DAPI+	13
45783.6	44412.9	0.702149	µm	Spot	Position	1	DCX-	DAPI+	15
45841.4	44457.3	1.12495	µm	Spot	Position	1	DCX-	DAPI+	16
45841.8	44460.9	1.06224	µm	Spot	Position	1	DCX-	DAPI+	17
45738.6	43176.3	1.60618	µm	Spot	Position	1	DCX-	DAPI+	21
45729.4	43222.2	1.2113	µm	Spot	Position	1	DCX-	DAPI+	22
45738.8	43198.1	1.23263	µm	Spot	Position	1	DCX-	DAPI+	23
45742	43189.9	1.79173	µm	Spot	Position	1	DCX-	DAPI+	24
45658.4	43586.6	1.46357	µm	Spot	Position	1	DCX-	DAPI+	26
45572.8	44080.6	2.06023	µm	Spot	Position	1	DCX-	DAPI+	31
45566.7	44148.5	2.04887	µm	Spot	Position	1	DCX-	DAPI+	34
45572	44113.1	2.22688	µm	Spot	Position	1	DCX-	DAPI+	35
45553.1	44173.4	2.23002	µm	Spot	Position	1	DCX-	DAPI+	37
45563.8	44191.7	2.16524	µm	Spot	Position	1	DCX-	DAPI+	38
45552.5	44201.5	1.33172	µm	Spot	Position	1	DCX-	DAPI+	39
45574.1	44229.7	2.28295	µm	Spot	Position	1	DCX-	DAPI+	40
45604	44259.5	1.25021	µm	Spot	Position	1	DCX-	DAPI+	42
45600	44253.6	1.69744	µm	Spot	Position	1	DCX-	DAPI+	43
45600.4	44258.3	1.64216	µm	Spot	Position	1	DCX-	DAPI+	44
45596	44270.1	1.5801	µm	Spot	Position	1	DCX-	DAPI+	45
45603.8	44251.2	1.84198	µm	Spot	Position	1	DCX-	DAPI+	47
45603.6	44256.8	2.0464	µm	Spot	Position	1	DCX-	DAPI+	48
45608.2	44269.8	1.84433	µm	Spot	Position	1	DCX-	DAPI+	49
45596.9	44252.6	2.33155	µm	Spot	Position	1	DCX-	DAPI+	50
45637.2	44304.8	2.3963	µm	Spot	Position	1	DCX-	DAPI+	57
45633.6	44321.5	2.20043	µm	Spot	Position	1	DCX-	DAPI+	58
45643.2	44298	1.44864	µm	Spot	Position	1	DCX-	DAPI+	59
45657.3	44333.1	1.42665	µm	Spot	Position	1	DCX-	DAPI+	60
45641.7	44299.9	1.50585	µm	Spot	Position	1	DCX-	DAPI+	61
45679.6	44336.3	1.64263	µm	Spot	Position	1	DCX-	DAPI+	62
45640.3	44310.1	2.03794	µm	Spot	Position	1	DCX-	DAPI+	63
45670.9	44351.9	2.20125	µm	Spot	Position	1	DCX-	DAPI+	70
45714.1	44375.8	1.44717	µm	Spot	Position	1	DCX-	DAPI+	73
45696.2	44365.2	1.65486	µm	Spot	Position	1	DCX-	DAPI+	74
45686.5	44348.1	2.22283	µm	Spot	Position	1	DCX-	DAPI+	78
45689.4	44363.3	2.17425	µm	Spot	Position	1	DCX-	DAPI+	80
45746.5	44377.2	1.81729	µm	Spot	Position	1	DCX-	DAPI+	83
45846.1	44457.2	1.394	µm	Spot	Position	1	DCX-	DAPI+	93
45829	44445.3	1.55279	µm	Spot	Position	1	DCX-	DAPI+	95
45834.6	44457.6	1.51324	µm	Spot	Position	1	DCX-	DAPI+	96
45839.9	44462.2	1.69039	µm	Spot	Position	1	DCX-	DAPI+	97
45844.9	44458.6	1.85016	µm	Spot	Position	1	DCX-	DAPI+	98
45843.7	44457.7	2.3504	µm	Spot	Position	1	DCX-	DAPI+	100
45844.8	44461.5	2.18899	µm	Spot	Position	1	DCX-	DAPI+	101
45901.4	44466.1	2.3114	µm	Spot	Position	1	DCX-	DAPI+	103
45884.1	44474.2	2.21621	µm	Spot	Position	1	DCX-	DAPI+	104
45926.8	44465.1	1.94563	µm	Spot	Position	1	DCX-	DAPI+	106
45920.5	44468.9	2.09722	µm	Spot	Position	1	DCX-	DAPI+	107
45924.2	44463	2.10499	µm	Spot	Position	1	DCX-	DAPI+	109
45959.8	44481.2	2.347	µm	Spot	Position	1	DCX-	DAPI+	114
45778.6	42910.9	2.76747	µm	Spot	Position	1	DCX-	DAPI+	117
45786.8	42914	2.8572	µm	Spot	Position	1	DCX-	DAPI+	118
45770.2	42971.8	2.97397	µm	Spot	Position	1	DCX-	DAPI+	119
45760.1	42997.4	2.98311	µm	Spot	Position	1	DCX-	DAPI+	120
45744.1	43077.3	3.48795	µm	Spot	Position	1	DCX-	DAPI+	122
45739.9	43155.6	3.2152	µm	Spot	Position	1	DCX-	DAPI+	125
45729.2	43217.9	2.70832	µm	Spot	Position	1	DCX-	DAPI+	127
45733.8	43190.4	3.29444	µm	Spot	Position	1	DCX-	DAPI+	128
45734	43213.6	3.5888	µm	Spot	Position	1	DCX-	DAPI+	129
45657.1	43585.2	3.50105	µm	Spot	Position	1	DCX-	DAPI+	131
45646	43646.6	3.11057	µm	Spot	Position	1	DCX-	DAPI+	132
45642.3	43674.2	3.04533	µm	Spot	Position	1	DCX-	DAPI+	133
45630.5	43743.3	2.90855	µm	Spot	Position	1	DCX-	DAPI+	134
45598.1	43884.8	3.21066	µm	Spot	Position	1	DCX-	DAPI+	137
45597.2	43886.4	3.06389	µm	Spot	Position	1	DCX-	DAPI+	138
45588.1	43962.7	2.96003	µm	Spot	Position	1	DCX-	DAPI+	140
45581.6	43966.5	3.51241	µm	Spot	Position	1	DCX-	DAPI+	141
45577.5	43978.4	2.97642	µm	Spot	Position	1	DCX-	DAPI+	143
45584.2	43977.8	3.22247	µm	Spot	Position	1	DCX-	DAPI+	145
45576.7	44052.5	3.06304	µm	Spot	Position	1	DCX-	DAPI+	147
45572.3	44085.3	2.61505	µm	Spot	Position	1	DCX-	DAPI+	148
45563.1	44120.2	3.56409	µm	Spot	Position	1	DCX-	DAPI+	152
45557.8	44159.1	2.65812	µm	Spot	Position	1	DCX-	DAPI+	153
45561.6	44156.3	3.10316	µm	Spot	Position	1	DCX-	DAPI+	154
45562.1	44189	3.13844	µm	Spot	Position	1	DCX-	DAPI+	155
45558.3	44183.4	3.30792	µm	Spot	Position	1	DCX-	DAPI+	156
45576.1	44204	2.54621	µm	Spot	Position	1	DCX-	DAPI+	157
45554.2	44207.1	2.57828	µm	Spot	Position	1	DCX-	DAPI+	158
45579.1	44232.4	2.58874	µm	Spot	Position	1	DCX-	DAPI+	159
45592.7	44234.1	2.52852	µm	Spot	Position	1	DCX-	DAPI+	160
45580.2	44241	2.48199	µm	Spot	Position	1	DCX-	DAPI+	161
45559.7	44210.3	3.24508	µm	Spot	Position	1	DCX-	DAPI+	164
45580.8	44215.4	3.0676	µm	Spot	Position	1	DCX-	DAPI+	165
45588.1	44246.6	2.60081	µm	Spot	Position	1	DCX-	DAPI+	166
45588.5	44249.7	2.62122	µm	Spot	Position	1	DCX-	DAPI+	167
45586.2	44250.6	2.78613	µm	Spot	Position	1	DCX-	DAPI+	168
45604.1	44261.1	2.55624	µm	Spot	Position	1	DCX-	DAPI+	169
45608.1	44264.1	2.51813	µm	Spot	Position	1	DCX-	DAPI+	170
45603.7	44277.3	3.27772	µm	Spot	Position	1	DCX-	DAPI+	176
45625.8	44287.6	3.06924	µm	Spot	Position	1	DCX-	DAPI+	177
45596.6	44253.5	3.44349	µm	Spot	Position	1	DCX-	DAPI+	179
45598.8	44272.2	3.56507	µm	Spot	Position	1	DCX-	DAPI+	182
45628.5	44281.6	3.4835	µm	Spot	Position	1	DCX-	DAPI+	183
45609.6	44288.7	3.41519	µm	Spot	Position	1	DCX-	DAPI+	184
45637.2	44311	2.6226	µm	Spot	Position	1	DCX-	DAPI+	187
45626.2	44292.5	2.76112	µm	Spot	Position	1	DCX-	DAPI+	188
45620	44311.1	2.88445	µm	Spot	Position	1	DCX-	DAPI+	190
45621.6	44315.8	2.87358	µm	Spot	Position	1	DCX-	DAPI+	191
45619.6	44314.2	3.23159	µm	Spot	Position	1	DCX-	DAPI+	195
45636.6	44316.6	3.25393	µm	Spot	Position	1	DCX-	DAPI+	196
45621.8	44305.3	3.56579	µm	Spot	Position	1	DCX-	DAPI+	197
45623.8	44308.2	3.34791	µm	Spot	Position	1	DCX-	DAPI+	198
45633.3	44314	3.46629	µm	Spot	Position	1	DCX-	DAPI+	199
45636.3	44317.7	3.46041	µm	Spot	Position	1	DCX-	DAPI+	200
45640.9	44304.2	2.45551	µm	Spot	Position	1	DCX-	DAPI+	202
45641.7	44312.5	2.47808	µm	Spot	Position	1	DCX-	DAPI+	203
45650.6	44335.3	2.82099	µm	Spot	Position	1	DCX-	DAPI+	210
45646	44326.8	3.15698	µm	Spot	Position	1	DCX-	DAPI+	213
45641.2	44309.6	3.37514	µm	Spot	Position	1	DCX-	DAPI+	217
45640	44317.2	3.44831	µm	Spot	Position	1	DCX-	DAPI+	220
45675	44345.9	2.65947	µm	Spot	Position	1	DCX-	DAPI+	223
45668.7	44351.1	2.41629	µm	Spot	Position	1	DCX-	DAPI+	224
45675.9	44352.4	2.4706	µm	Spot	Position	1	DCX-	DAPI+	225
45693.2	44359.6	2.65966	µm	Spot	Position	1	DCX-	DAPI+	231
45711	44365.6	2.51594	µm	Spot	Position	1	DCX-	DAPI+	232
45713.6	44363.4	3.10793	µm	Spot	Position	1	DCX-	DAPI+	238
45699.9	44370.2	3.28237	µm	Spot	Position	1	DCX-	DAPI+	240
45699.2	44360.9	3.51691	µm	Spot	Position	1	DCX-	DAPI+	243
45696.9	44371.7	3.50317	µm	Spot	Position	1	DCX-	DAPI+	244
45706.1	44375.4	3.58669	µm	Spot	Position	1	DCX-	DAPI+	245
45718.1	44376.3	3.46879	µm	Spot	Position	1	DCX-	DAPI+	246
45719.7	44386	2.89259	µm	Spot	Position	1	DCX-	DAPI+	252
45778.3	44406.8	2.69144	µm	Spot	Position	1	DCX-	DAPI+	254
45765.2	44409.6	3.16036	µm	Spot	Position	1	DCX-	DAPI+	261
45763.8	44407.8	3.55995	µm	Spot	Position	1	DCX-	DAPI+	263
45767.4	44410.2	3.57705	µm	Spot	Position	1	DCX-	DAPI+	264
45792	44413.5	3.44886	µm	Spot	Position	1	DCX-	DAPI+	266
45806.9	44438.6	2.53141	µm	Spot	Position	1	DCX-	DAPI+	267
45794.1	44434.3	2.97013	µm	Spot	Position	1	DCX-	DAPI+	268
45834.8	44446.6	2.94962	µm	Spot	Position	1	DCX-	DAPI+	273
45852.2	44461.1	2.70379	µm	Spot	Position	1	DCX-	DAPI+	274
45837.3	44457.3	3.21123	µm	Spot	Position	1	DCX-	DAPI+	279
45864.8	44465.6	3.07998	µm	Spot	Position	1	DCX-	DAPI+	281
45862.6	44445.6	3.60036	µm	Spot	Position	1	DCX-	DAPI+	284
45860.3	44459.2	3.32556	µm	Spot	Position	1	DCX-	DAPI+	286
45902.9	44470.7	2.8889	µm	Spot	Position	1	DCX-	DAPI+	291
45883.5	44450.3	3.44725	µm	Spot	Position	1	DCX-	DAPI+	293
45914.2	44460.3	3.38303	µm	Spot	Position	1	DCX-	DAPI+	294
45877.6	44462.9	3.53847	µm	Spot	Position	1	DCX-	DAPI+	295
45909.5	44462.9	3.52997	µm	Spot	Position	1	DCX-	DAPI+	296
45911.7	44466.9	3.49211	µm	Spot	Position	1	DCX-	DAPI+	297
45925.7	44457.8	2.9673	µm	Spot	Position	1	DCX-	DAPI+	304
45940.9	44466.2	3.11452	µm	Spot	Position	1	DCX-	DAPI+	309
45930.5	44466.7	3.13195	µm	Spot	Position	1	DCX-	DAPI+	310
45951.2	44466.9	3.20092	µm	Spot	Position	1	DCX-	DAPI+	311
45938.8	44458.4	3.55493	µm	Spot	Position	1	DCX-	DAPI+	313
45983.8	44467.2	2.63655	µm	Spot	Position	1	DCX-	DAPI+	314
45963.9	44461.2	3.22385	µm	Spot	Position	1	DCX-	DAPI+	320
45995.6	44463.1	3.15675	µm	Spot	Position	1	DCX-	DAPI+	321
45979.6	44466.7	3.2894	µm	Spot	Position	1	DCX-	DAPI+	322
45983.7	44460.7	3.48937	µm	Spot	Position	1	DCX-	DAPI+	325
45958.2	44485.8	2.95671	µm	Spot	Position	1	DCX-	DAPI+	339
45923.2	44475.4	3.15153	µm	Spot	Position	1	DCX-	DAPI+	340
45770.9	42901.5	3.8296	µm	Spot	Position	1	DCX-	DAPI+	349
45770.7	42881.2	3.98614	µm	Spot	Position	1	DCX-	DAPI+	350
45755.8	43037.8	3.80434	µm	Spot	Position	1	DCX-	DAPI+	353
45746.2	43059.8	3.83845	µm	Spot	Position	1	DCX-	DAPI+	355
45696.4	43430.8	3.84641	µm	Spot	Position	1	DCX-	DAPI+	356
45697.4	43430.4	4.03397	µm	Spot	Position	1	DCX-	DAPI+	357
45687.2	43486.3	4.29105	µm	Spot	Position	1	DCX-	DAPI+	358
45687.6	43512.4	3.78963	µm	Spot	Position	1	DCX-	DAPI+	359
45662	43575.1	3.69077	µm	Spot	Position	1	DCX-	DAPI+	360
45650.4	43621.8	4.22276	µm	Spot	Position	1	DCX-	DAPI+	361
45649.2	43640.3	4.45954	µm	Spot	Position	1	DCX-	DAPI+	362
45642.8	43679.7	4.05609	µm	Spot	Position	1	DCX-	DAPI+	363
45642.6	43666.5	4.39335	µm	Spot	Position	1	DCX-	DAPI+	364
45586.6	43921	4.42939	µm	Spot	Position	1	DCX-	DAPI+	365
45598.2	43897.8	3.74308	µm	Spot	Position	1	DCX-	DAPI+	366
45582.8	43996.2	3.725	µm	Spot	Position	1	DCX-	DAPI+	367
45581.5	43971.2	4.08194	µm	Spot	Position	1	DCX-	DAPI+	369
45578.7	44007.6	4.16825	µm	Spot	Position	1	DCX-	DAPI+	371
45578.1	43981.3	4.26523	µm	Spot	Position	1	DCX-	DAPI+	372
45577	44056.5	3.753	µm	Spot	Position	1	DCX-	DAPI+	374
45578	44017.8	4.19555	µm	Spot	Position	1	DCX-	DAPI+	375
45580.6	44026.2	3.9401	µm	Spot	Position	1	DCX-	DAPI+	376
45578.3	44034.6	4.28927	µm	Spot	Position	1	DCX-	DAPI+	377
45569.9	44096.2	3.77852	µm	Spot	Position	1	DCX-	DAPI+	378
45570.1	44127.1	3.73501	µm	Spot	Position	1	DCX-	DAPI+	379
45562.2	44167.3	3.99442	µm	Spot	Position	1	DCX-	DAPI+	383
45569.8	44195.5	4.1274	µm	Spot	Position	1	DCX-	DAPI+	384
45566	44199.6	3.66967	µm	Spot	Position	1	DCX-	DAPI+	385
45571.4	44226.9	3.64885	µm	Spot	Position	1	DCX-	DAPI+	386
45554	44210.2	4.15407	µm	Spot	Position	1	DCX-	DAPI+	387
45576	44215.3	4.05303	µm	Spot	Position	1	DCX-	DAPI+	388
45582.7	44224	4.07073	µm	Spot	Position	1	DCX-	DAPI+	389
45576.2	44210.6	4.20372	µm	Spot	Position	1	DCX-	DAPI+	390
45567	44217.6	4.25565	µm	Spot	Position	1	DCX-	DAPI+	391
45576.2	44232	4.25912	µm	Spot	Position	1	DCX-	DAPI+	392
45605.1	44250.2	3.65848	µm	Spot	Position	1	DCX-	DAPI+	393
45615.4	44262.2	4.12207	µm	Spot	Position	1	DCX-	DAPI+	394
45620.5	44287.6	4.16214	µm	Spot	Position	1	DCX-	DAPI+	395
45628.8	44288.6	4.14734	µm	Spot	Position	1	DCX-	DAPI+	396
45607.7	44281.8	4.29079	µm	Spot	Position	1	DCX-	DAPI+	399
45632.7	44323.1	3.62012	µm	Spot	Position	1	DCX-	DAPI+	401
45617.7	44304.1	4.11471	µm	Spot	Position	1	DCX-	DAPI+	402
45614.8	44306.9	3.94773	µm	Spot	Position	1	DCX-	DAPI+	403
45611.1	44300.4	4.30266	µm	Spot	Position	1	DCX-	DAPI+	404
45642.6	44327.8	3.71854	µm	Spot	Position	1	DCX-	DAPI+	407
45640.3	44296.8	3.92813	µm	Spot	Position	1	DCX-	DAPI+	408
45645	44321.1	4.00666	µm	Spot	Position	1	DCX-	DAPI+	410
45676	44331.5	3.94371	µm	Spot	Position	1	DCX-	DAPI+	411
45655.5	44334.7	4.43443	µm	Spot	Position	1	DCX-	DAPI+	412
45682.5	44354.9	4.0595	µm	Spot	Position	1	DCX-	DAPI+	414
45691.4	44348.5	4.08012	µm	Spot	Position	1	DCX-	DAPI+	418
45722.4	44371	4.02187	µm	Spot	Position	1	DCX-	DAPI+	419
45723.3	44372.9	4.0069	µm	Spot	Position	1	DCX-	DAPI+	420
45712.5	44374.4	4.26429	µm	Spot	Position	1	DCX-	DAPI+	422
45759.9	44383.8	3.63668	µm	Spot	Position	1	DCX-	DAPI+	426
45762.7	44405.9	3.85362	µm	Spot	Position	1	DCX-	DAPI+	429
45767.1	44386.5	4.14819	µm	Spot	Position	1	DCX-	DAPI+	430
45776.5	44412.9	3.99897	µm	Spot	Position	1	DCX-	DAPI+	432
45809.4	44421.7	4.42473	µm	Spot	Position	1	DCX-	DAPI+	440
45819.6	44429.3	3.60871	µm	Spot	Position	1	DCX-	DAPI+	442
45798.3	44431.2	3.77333	µm	Spot	Position	1	DCX-	DAPI+	443
45797.7	44434.2	3.94952	µm	Spot	Position	1	DCX-	DAPI+	444
45812.3	44435.2	4.15948	µm	Spot	Position	1	DCX-	DAPI+	445
45816.4	44443.6	4.46413	µm	Spot	Position	1	DCX-	DAPI+	447
45841	44438.4	3.69656	µm	Spot	Position	1	DCX-	DAPI+	449
45863.6	44446.6	3.83282	µm	Spot	Position	1	DCX-	DAPI+	450
45851.8	44454.9	3.98927	µm	Spot	Position	1	DCX-	DAPI+	451
45855.3	44460.2	4.13742	µm	Spot	Position	1	DCX-	DAPI+	453
45846.9	44448	4.22608	µm	Spot	Position	1	DCX-	DAPI+	455
45844.3	44448.4	4.42041	µm	Spot	Position	1	DCX-	DAPI+	456
45879.3	44455.8	3.83407	µm	Spot	Position	1	DCX-	DAPI+	458
45905.8	44453.9	4.1598	µm	Spot	Position	1	DCX-	DAPI+	461
45902.6	44473	4.20697	µm	Spot	Position	1	DCX-	DAPI+	463
45905.5	44458.7	4.51801	µm	Spot	Position	1	DCX-	DAPI+	464
45937.7	44455.4	3.88566	µm	Spot	Position	1	DCX-	DAPI+	465
45941	44470.1	3.77311	µm	Spot	Position	1	DCX-	DAPI+	468
45960.3	44475.2	3.80506	µm	Spot	Position	1	DCX-	DAPI+	469
45928.5	44455.3	4.02155	µm	Spot	Position	1	DCX-	DAPI+	470
45947.4	44463.4	4.15411	µm	Spot	Position	1	DCX-	DAPI+	472
45999	44457.6	3.7216	µm	Spot	Position	1	DCX-	DAPI+	477
46002.1	44463	4.00654	µm	Spot	Position	1	DCX-	DAPI+	484
45982.1	44469	4.03928	µm	Spot	Position	1	DCX-	DAPI+	485
46001	44459.9	4.32078	µm	Spot	Position	1	DCX-	DAPI+	487
46009.5	44470.2	3.8044	µm	Spot	Position	1	DCX-	DAPI+	490
45961.3	44483.5	3.71377	µm	Spot	Position	1	DCX-	DAPI+	505
45990.5	44476.1	3.79195	µm	Spot	Position	1	DCX-	DAPI+	507
45755.6	42993.5	0.752857	µm	Spot	Position	1	DCX+;DCX-	DAPI+;DAPI-	0

## Sheet: Sample 3-Rlbp1+DCX_Position - A
AC350 Rlbp1 555 DCX 488_R_[ii24_TileScan_1_Merged_Image_25]_Position
Position
====================
Position X	Position Y	Position Z	Unit	Category	Collection	Time	DCX	dapi	ID
97870	38237.1	4.67928	µm	Spot	Position	1		DAPI-	4
97873.3	38237.3	4.70437	µm	Spot	Position	1		DAPI-	5
97954.1	39204.7	4.02905	µm	Spot	Position	1		DAPI-	7
97953.2	39203.9	4.48942	µm	Spot	Position	1		DAPI-	8
98435.1	39565.5	4.07452	µm	Spot	Position	1		DAPI-	13
97872.1	38236.1	5.29406	µm	Spot	Position	1		DAPI-	15
97975.1	39270.6	5.87422	µm	Spot	Position	1		DAPI-	23
98375.1	39569.1	5.31235	µm	Spot	Position	1		DAPI-	25
98411.2	39561.3	5.89115	µm	Spot	Position	1		DAPI-	27
97948.1	39165.7	7.00367	µm	Spot	Position	1		DAPI-	41
97934.8	39214.2	6.77032	µm	Spot	Position	1		DAPI-	43
97969.9	39224.2	7.18054	µm	Spot	Position	1		DAPI-	60
97968.2	39256.9	7.15557	µm	Spot	Position	1		DAPI-	65
98349	39553.7	6.98297	µm	Spot	Position	1		DAPI-	81
98376.8	39571.5	6.23401	µm	Spot	Position	1		DAPI-	83
98373.8	39570.6	6.40968	µm	Spot	Position	1		DAPI-	86
98391.1	39554.6	7.18027	µm	Spot	Position	1		DAPI-	90
98377.4	39556.6	6.99529	µm	Spot	Position	1		DAPI-	91
98374.4	39565.4	7.09089	µm	Spot	Position	1		DAPI-	93
98539.7	39586.6	7.0539	µm	Spot	Position	1		DAPI-	105
97929.3	39150.1	7.76964	µm	Spot	Position	1		DAPI-	125
97925.1	39201.5	8.04489	µm	Spot	Position	1		DAPI-	143
97926.5	39214.8	8.26609	µm	Spot	Position	1		DAPI-	172
97979.9	39243.2	7.41594	µm	Spot	Position	1		DAPI-	176
97975.9	39237.1	7.72207	µm	Spot	Position	1		DAPI-	185
97982	39249.8	8.32411	µm	Spot	Position	1		DAPI-	197
97974.3	39266.3	8.01074	µm	Spot	Position	1		DAPI-	208
98004.6	39299.6	8.01089	µm	Spot	Position	1		DAPI-	213
98005.4	39297.9	8.24507	µm	Spot	Position	1		DAPI-	214
98018.1	39312.6	7.48585	µm	Spot	Position	1		DAPI-	219
98007.1	39315.2	7.37932	µm	Spot	Position	1		DAPI-	220
98011	39312.8	8.23862	µm	Spot	Position	1		DAPI-	230
98037.4	39348.9	8.01918	µm	Spot	Position	1		DAPI-	234
98103.1	39392.2	8.21554	µm	Spot	Position	1		DAPI-	249
98114.2	39412.9	7.70751	µm	Spot	Position	1		DAPI-	255
98129.7	39402.2	7.63647	µm	Spot	Position	1		DAPI-	262
98183	39449.4	8.29237	µm	Spot	Position	1		DAPI-	264
98202	39468.1	8.13571	µm	Spot	Position	1		DAPI-	265
98230.2	39485.6	8.39363	µm	Spot	Position	1		DAPI-	266
98240.9	39489.2	7.73322	µm	Spot	Position	1		DAPI-	267
98350.3	39553.7	7.51788	µm	Spot	Position	1		DAPI-	271
98340.3	39546.7	8.01563	µm	Spot	Position	1		DAPI-	272
98389	39556.5	8.1712	µm	Spot	Position	1		DAPI-	290
98426.6	39573.6	7.68614	µm	Spot	Position	1		DAPI-	298
98405.2	39566	7.85413	µm	Spot	Position	1		DAPI-	299
98466.5	39571	7.83892	µm	Spot	Position	1		DAPI-	306
98488.1	39583.3	7.43294	µm	Spot	Position	1		DAPI-	310
98469.5	39591.3	7.88038	µm	Spot	Position	1		DAPI-	319
98490.1	39582.5	8.25932	µm	Spot	Position	1		DAPI-	321
98536.8	39594	7.84372	µm	Spot	Position	1		DAPI-	329
98519.8	39597.4	8.29789	µm	Spot	Position	1		DAPI-	331
98543.3	39594.9	8.2942	µm	Spot	Position	1		DAPI-	334
97941.1	38902.8	9.58263	µm	Spot	Position	1		DAPI-	367
97924.7	39206.2	8.56906	µm	Spot	Position	1		DAPI-	442
97924.6	39213.7	9.50441	µm	Spot	Position	1		DAPI-	497
97982.4	39247.3	8.71185	µm	Spot	Position	1		DAPI-	516
97971.4	39257.1	8.87131	µm	Spot	Position	1		DAPI-	519
97972	39254	9.13414	µm	Spot	Position	1		DAPI-	527
97983.6	39250	9.58239	µm	Spot	Position	1		DAPI-	532
97991.5	39256	9.20501	µm	Spot	Position	1		DAPI-	537
97989.1	39250.4	9.60017	µm	Spot	Position	1		DAPI-	538
97992.9	39255.4	9.54543	µm	Spot	Position	1		DAPI-	540
97972.5	39299.2	8.45082	µm	Spot	Position	1		DAPI-	551
97964.2	39263	9.1137	µm	Spot	Position	1		DAPI-	557
97975	39288.3	9.23225	µm	Spot	Position	1		DAPI-	562
97980.3	39288.7	9.22362	µm	Spot	Position	1		DAPI-	563
97989.1	39279.7	8.67104	µm	Spot	Position	1		DAPI-	572
98000.9	39297.7	8.92991	µm	Spot	Position	1		DAPI-	574
98007.9	39294.8	9.29291	µm	Spot	Position	1		DAPI-	578
97986.4	39314	9.10604	µm	Spot	Position	1		DAPI-	584
97975.7	39312.9	9.39737	µm	Spot	Position	1		DAPI-	587
98024.3	39308.2	9.43857	µm	Spot	Position	1		DAPI-	603
98017.3	39310.5	9.35952	µm	Spot	Position	1		DAPI-	604
98010	39313.3	9.4184	µm	Spot	Position	1		DAPI-	605
98047.4	39333.4	9.09263	µm	Spot	Position	1		DAPI-	614
98054.4	39347.6	9.59527	µm	Spot	Position	1		DAPI-	617
98043.9	39353.5	8.55815	µm	Spot	Position	1		DAPI-	621
98036.7	39350.4	8.86479	µm	Spot	Position	1		DAPI-	624
98104.5	39392.7	8.47338	µm	Spot	Position	1		DAPI-	635
98095.9	39384.6	9.22728	µm	Spot	Position	1		DAPI-	637
98092.2	39386.1	9.14374	µm	Spot	Position	1		DAPI-	638
98108.5	39408.5	8.45162	µm	Spot	Position	1		DAPI-	641
98115.3	39414.8	8.92005	µm	Spot	Position	1		DAPI-	645
98115.5	39420.5	8.9295	µm	Spot	Position	1		DAPI-	647
98108.9	39398.5	9.04326	µm	Spot	Position	1		DAPI-	648
98106.9	39406.1	9.06025	µm	Spot	Position	1		DAPI-	649
98134.4	39411.3	9.49323	µm	Spot	Position	1		DAPI-	665
98139.4	39418.6	9.38715	µm	Spot	Position	1		DAPI-	666
98143.4	39427.7	9.48313	µm	Spot	Position	1		DAPI-	667
98194.8	39458.6	8.4232	µm	Spot	Position	1		DAPI-	672
98205.2	39467.4	8.66388	µm	Spot	Position	1		DAPI-	673
98198.7	39453.3	9.45888	µm	Spot	Position	1		DAPI-	678
98242.3	39486.3	8.78357	µm	Spot	Position	1		DAPI-	681
98232.2	39483.1	9.51234	µm	Spot	Position	1		DAPI-	683
98237.5	39488.3	8.47162	µm	Spot	Position	1		DAPI-	685
98244.8	39496.6	8.7481	µm	Spot	Position	1		DAPI-	687
98252.2	39502.5	9.23968	µm	Spot	Position	1		DAPI-	692
98248.6	39490.7	9.44478	µm	Spot	Position	1		DAPI-	694
98275.6	39518.7	8.99191	µm	Spot	Position	1		DAPI-	696
98272	39520.6	8.86289	µm	Spot	Position	1		DAPI-	697
98276.8	39507.3	9.43412	µm	Spot	Position	1		DAPI-	704
98279.2	39509.9	9.40053	µm	Spot	Position	1		DAPI-	705
98274.9	39522.3	9.5477	µm	Spot	Position	1		DAPI-	710
98310.7	39533.4	8.82538	µm	Spot	Position	1		DAPI-	713
98395	39553.6	8.56354	µm	Spot	Position	1		DAPI-	731
98370.8	39556.7	8.50149	µm	Spot	Position	1		DAPI-	733
98399.5	39573.6	8.53926	µm	Spot	Position	1		DAPI-	735
98366.4	39552.4	8.88992	µm	Spot	Position	1		DAPI-	737
98393.3	39553.9	8.82393	µm	Spot	Position	1		DAPI-	738
98380.8	39560.4	8.84542	µm	Spot	Position	1		DAPI-	741
98361.4	39572.2	9.20733	µm	Spot	Position	1		DAPI-	749
98389.7	39577.4	9.19455	µm	Spot	Position	1		DAPI-	751
98409.9	39570	8.66043	µm	Spot	Position	1		DAPI-	759
98416.4	39573.6	8.90083	µm	Spot	Position	1		DAPI-	761
98403.3	39550.1	9.29156	µm	Spot	Position	1		DAPI-	763
98407	39566.6	9.28902	µm	Spot	Position	1		DAPI-	765
98448	39555.3	9.59086	µm	Spot	Position	1		DAPI-	767
98470.3	39575.4	8.63398	µm	Spot	Position	1		DAPI-	772
98491.8	39580.1	8.69492	µm	Spot	Position	1		DAPI-	774
98456	39562.7	9.0729	µm	Spot	Position	1		DAPI-	778
98459.7	39564.8	9.17476	µm	Spot	Position	1		DAPI-	779
98448.9	39556.3	9.40166	µm	Spot	Position	1		DAPI-	784
98479.9	39560.8	9.42323	µm	Spot	Position	1		DAPI-	785
98490.4	39579.1	9.45517	µm	Spot	Position	1		DAPI-	787
98497.3	39574.2	9.19412	µm	Spot	Position	1		DAPI-	793
98492.2	39582.1	8.90615	µm	Spot	Position	1		DAPI-	809
98467.8	39591	8.89287	µm	Spot	Position	1		DAPI-	811
98488.1	39580.8	9.19248	µm	Spot	Position	1		DAPI-	814
98461.3	39585.1	9.21555	µm	Spot	Position	1		DAPI-	816
98481.4	39588.4	9.53825	µm	Spot	Position	1		DAPI-	822
98493.5	39594.1	9.47684	µm	Spot	Position	1		DAPI-	823
98504.1	39594.7	8.57657	µm	Spot	Position	1		DAPI-	826
98505.3	39597	8.52665	µm	Spot	Position	1		DAPI-	828
98504.1	39597	8.76585	µm	Spot	Position	1		DAPI-	830
98522.3	39587	9.1291	µm	Spot	Position	1		DAPI-	832
98521.3	39587.2	9.17565	µm	Spot	Position	1		DAPI-	833
98500.7	39592.2	9.18201	µm	Spot	Position	1		DAPI-	834
98499.5	39585	9.33068	µm	Spot	Position	1		DAPI-	836
98544.5	39594.1	8.72763	µm	Spot	Position	1		DAPI-	845
98548.8	39594.8	9.14712	µm	Spot	Position	1		DAPI-	847
98549.2	39595.8	9.08982	µm	Spot	Position	1		DAPI-	848
98722.4	39614.4	8.58778	µm	Spot	Position	1		DAPI-	850
98719.9	39613.2	9.23756	µm	Spot	Position	1		DAPI-	851
98716.5	39618.6	9.06558	µm	Spot	Position	1		DAPI-	853
98727.4	39619.4	9.50723	µm	Spot	Position	1		DAPI-	855
97931.6	38335.9	10.6451	µm	Spot	Position	1		DAPI-	892
97946.6	38356.5	10.2665	µm	Spot	Position	1		DAPI-	894
97954.5	38557.7	10.0225	µm	Spot	Position	1		DAPI-	904
97942	38811.8	10.3445	µm	Spot	Position	1		DAPI-	926
97943.2	38887.5	9.97038	µm	Spot	Position	1		DAPI-	940
97931.1	38966.7	10.2476	µm	Spot	Position	1		DAPI-	963
97941.9	38967	10.7991	µm	Spot	Position	1		DAPI-	966
97937.8	39021	10.2574	µm	Spot	Position	1		DAPI-	979
97937.9	39010.9	10.5213	µm	Spot	Position	1		DAPI-	982
97953.6	39159.7	9.98393	µm	Spot	Position	1		DAPI-	1042
97950.7	39150.1	10.7086	µm	Spot	Position	1		DAPI-	1044
97924.9	39209	10.0347	µm	Spot	Position	1		DAPI-	1097
97956.9	39174	10.0074	µm	Spot	Position	1		DAPI-	1117
97972.5	39198.8	10.2922	µm	Spot	Position	1		DAPI-	1127
97967	39175.3	10.648	µm	Spot	Position	1		DAPI-	1130
97978	39221.6	10.1632	µm	Spot	Position	1		DAPI-	1200
97981	39212	10.3296	µm	Spot	Position	1		DAPI-	1209
97983.1	39238.1	10.3645	µm	Spot	Position	1		DAPI-	1216
97963.6	39263.5	9.79212	µm	Spot	Position	1		DAPI-	1248
97953.2	39291.8	10.3365	µm	Spot	Position	1		DAPI-	1264
97989.1	39282.2	9.83383	µm	Spot	Position	1		DAPI-	1275
98013.4	39299.3	9.73046	µm	Spot	Position	1		DAPI-	1278
97986.9	39295	10.1539	µm	Spot	Position	1		DAPI-	1283
97988.1	39294.7	10.2768	µm	Spot	Position	1		DAPI-	1289
97987.4	39293.9	10.6424	µm	Spot	Position	1		DAPI-	1293
97977	39317.9	10.074	µm	Spot	Position	1		DAPI-	1298
98023.7	39313.1	9.83723	µm	Spot	Position	1		DAPI-	1301
98027.7	39306	10.603	µm	Spot	Position	1		DAPI-	1315
98056.2	39347.2	9.82309	µm	Spot	Position	1		DAPI-	1323
98033.2	39309.3	10.7573	µm	Spot	Position	1		DAPI-	1327
98053.8	39335.8	10.5664	µm	Spot	Position	1		DAPI-	1329
98061.9	39353.7	10.3111	µm	Spot	Position	1		DAPI-	1344
98083.6	39386.2	10.2228	µm	Spot	Position	1		DAPI-	1352
98081.3	39383.6	10.5441	µm	Spot	Position	1		DAPI-	1355
98085.1	39384.5	10.6892	µm	Spot	Position	1		DAPI-	1356
98082.8	39386.2	10.5619	µm	Spot	Position	1		DAPI-	1357
98123	39422.4	9.96345	µm	Spot	Position	1		DAPI-	1387
98103.4	39410.4	10.5752	µm	Spot	Position	1		DAPI-	1394
98124.4	39414.4	10.6972	µm	Spot	Position	1		DAPI-	1396
98128.7	39418	10.0851	µm	Spot	Position	1		DAPI-	1404
98154.2	39421.7	10.0633	µm	Spot	Position	1		DAPI-	1405
98165.8	39438.2	9.93758	µm	Spot	Position	1		DAPI-	1408
98181.6	39448.9	9.72602	µm	Spot	Position	1		DAPI-	1429
98179.7	39455.9	9.88531	µm	Spot	Position	1		DAPI-	1430
98198.6	39458.4	9.76434	µm	Spot	Position	1		DAPI-	1431
98207.9	39463.2	9.61664	µm	Spot	Position	1		DAPI-	1432
98178	39445.1	10.1332	µm	Spot	Position	1		DAPI-	1435
98177.1	39457.8	10.1737	µm	Spot	Position	1		DAPI-	1437
98200	39462.6	10.095	µm	Spot	Position	1		DAPI-	1439
98217.1	39483.8	9.99305	µm	Spot	Position	1		DAPI-	1441
98233.7	39481.1	9.8054	µm	Spot	Position	1		DAPI-	1450
98237.5	39483.9	10.0187	µm	Spot	Position	1		DAPI-	1453
98255.2	39500.9	10.4817	µm	Spot	Position	1		DAPI-	1467
98253.5	39498.8	10.7482	µm	Spot	Position	1		DAPI-	1475
98279.3	39512	9.77555	µm	Spot	Position	1		DAPI-	1482
98279.1	39518.5	9.871	µm	Spot	Position	1		DAPI-	1485
98299.6	39527	9.64093	µm	Spot	Position	1		DAPI-	1486
98272.3	39500.4	9.93362	µm	Spot	Position	1		DAPI-	1489
98302.9	39529	10.2433	µm	Spot	Position	1		DAPI-	1497
98302	39521.6	10.7009	µm	Spot	Position	1		DAPI-	1501
98269.9	39523.3	10.7391	µm	Spot	Position	1		DAPI-	1502
98280.8	39523.8	10.5755	µm	Spot	Position	1		DAPI-	1503
98299.6	39525.4	10.7359	µm	Spot	Position	1		DAPI-	1504
98329.3	39532.3	9.90583	µm	Spot	Position	1		DAPI-	1506
98316.2	39526.2	9.91358	µm	Spot	Position	1		DAPI-	1507
98311.1	39527.3	10.42	µm	Spot	Position	1		DAPI-	1508
98317.9	39526	10.6373	µm	Spot	Position	1		DAPI-	1510
98303.4	39540.5	10.4084	µm	Spot	Position	1		DAPI-	1518
98321.5	39556.8	9.81223	µm	Spot	Position	1		DAPI-	1525
98352.2	39560.9	9.96476	µm	Spot	Position	1		DAPI-	1526
98361.4	39573.5	9.66022	µm	Spot	Position	1		DAPI-	1540
98372.3	39546.7	10.1699	µm	Spot	Position	1		DAPI-	1543
98357.3	39547.3	9.95941	µm	Spot	Position	1		DAPI-	1544
98386.9	39546.7	10.7563	µm	Spot	Position	1		DAPI-	1552
98432.5	39555.3	9.69084	µm	Spot	Position	1		DAPI-	1556
98443.7	39555.9	9.82624	µm	Spot	Position	1		DAPI-	1557
98443.4	39557.7	9.98029	µm	Spot	Position	1		DAPI-	1559
98448.8	39558.1	10.3177	µm	Spot	Position	1		DAPI-	1580
98454.3	39562.5	10.3946	µm	Spot	Position	1		DAPI-	1581
98477.7	39563.1	10.3123	µm	Spot	Position	1		DAPI-	1582
98456.7	39558.3	10.7723	µm	Spot	Position	1		DAPI-	1587
98521.7	39572.1	9.81935	µm	Spot	Position	1		DAPI-	1591
98522.1	39573.8	9.99815	µm	Spot	Position	1		DAPI-	1595
98505	39578.3	10.1766	µm	Spot	Position	1		DAPI-	1597
98533.5	39572.5	10.2197	µm	Spot	Position	1		DAPI-	1601
98504	39564.9	10.5623	µm	Spot	Position	1		DAPI-	1602
98434	39581.8	10.1768	µm	Spot	Position	1		DAPI-	1630
98482.5	39588.3	9.70156	µm	Spot	Position	1		DAPI-	1634
98472.6	39590.2	9.81263	µm	Spot	Position	1		DAPI-	1635
98465.6	39591.3	9.69031	µm	Spot	Position	1		DAPI-	1636
98483.2	39587.9	10.2807	µm	Spot	Position	1		DAPI-	1644
98500.1	39593.8	10.6511	µm	Spot	Position	1		DAPI-	1660
98542.4	39596.4	9.88282	µm	Spot	Position	1		DAPI-	1665
98612	39605.9	10.4072	µm	Spot	Position	1		DAPI-	1695
98628.8	39609	10.5593	µm	Spot	Position	1		DAPI-	1697
98699.5	39613.5	9.81547	µm	Spot	Position	1		DAPI-	1702
98715.1	39615.8	9.80174	µm	Spot	Position	1		DAPI-	1703
98701.8	39611	10.0654	µm	Spot	Position	1		DAPI-	1704
98714.3	39616	9.99425	µm	Spot	Position	1		DAPI-	1705
98712.7	39621.3	9.92013	µm	Spot	Position	1		DAPI-	1707
98713.4	39616.9	10.2678	µm	Spot	Position	1		DAPI-	1708
98714.1	39620.7	10.3111	µm	Spot	Position	1		DAPI-	1709
98712.3	39623.1	10.311	µm	Spot	Position	1		DAPI-	1710
98729.4	39618.5	10.0399	µm	Spot	Position	1		DAPI-	1714
98731.4	39617.3	10.6797	µm	Spot	Position	1		DAPI-	1715
97936.5	38302.8	11.9977	µm	Spot	Position	1		DAPI-	1763
97949.9	38454.6	11.1815	µm	Spot	Position	1		DAPI-	1793
97946.9	38520	11.9593	µm	Spot	Position	1		DAPI-	1809
97953.2	38796.5	11.6926	µm	Spot	Position	1		DAPI-	1864
97935.9	38897.2	11.2919	µm	Spot	Position	1		DAPI-	1908
97949.4	39079.1	11.3696	µm	Spot	Position	1		DAPI-	2031
97947.3	39095.8	11.8648	µm	Spot	Position	1		DAPI-	2032
97919.6	39131.3	10.9754	µm	Spot	Position	1		DAPI-	2071
97920	39132.4	10.9355	µm	Spot	Position	1		DAPI-	2072
97915.9	39131.9	11.6359	µm	Spot	Position	1		DAPI-	2090
97947.7	39137.6	10.965	µm	Spot	Position	1		DAPI-	2105
97958.9	39159.5	11.4014	µm	Spot	Position	1		DAPI-	2110
97957.5	39142.6	11.5173	µm	Spot	Position	1		DAPI-	2113
97945.2	39138.6	11.9892	µm	Spot	Position	1		DAPI-	2116
97949.5	39145.9	11.7985	µm	Spot	Position	1		DAPI-	2119
97974.1	39198.8	11.5979	µm	Spot	Position	1		DAPI-	2224
97981.2	39209.9	11.5094	µm	Spot	Position	1		DAPI-	2226
97972.7	39194.6	11.7885	µm	Spot	Position	1		DAPI-	2227
97989.6	39234.1	10.9327	µm	Spot	Position	1		DAPI-	2320
97993.8	39256.6	11.0625	µm	Spot	Position	1		DAPI-	2322
97990.2	39251.4	11.2619	µm	Spot	Position	1		DAPI-	2325
97992.1	39253.5	11.4945	µm	Spot	Position	1		DAPI-	2331
97965.6	39287	11.5508	µm	Spot	Position	1		DAPI-	2390
97989.5	39290.8	11.1702	µm	Spot	Position	1		DAPI-	2410
97993.4	39279.8	11.6832	µm	Spot	Position	1		DAPI-	2413
98016.4	39286.6	11.6868	µm	Spot	Position	1		DAPI-	2415
98017.3	39290.8	11.4655	µm	Spot	Position	1		DAPI-	2418
98010.8	39265.5	11.7732	µm	Spot	Position	1		DAPI-	2421
98019.7	39283.7	12.0071	µm	Spot	Position	1		DAPI-	2424
98026.3	39304.7	10.9784	µm	Spot	Position	1		DAPI-	2458
97990.7	39324.8	11.0869	µm	Spot	Position	1		DAPI-	2462
97991.3	39325.5	11.3253	µm	Spot	Position	1		DAPI-	2472
98039.9	39317.4	11.3261	µm	Spot	Position	1		DAPI-	2488
98049.4	39333.1	11.2833	µm	Spot	Position	1		DAPI-	2490
98051.5	39347.5	11.3775	µm	Spot	Position	1		DAPI-	2495
98048.3	39325.8	11.5515	µm	Spot	Position	1		DAPI-	2498
98049.7	39329.3	11.5166	µm	Spot	Position	1		DAPI-	2499
98076.2	39366.4	10.9245	µm	Spot	Position	1		DAPI-	2550
98039.5	39351.8	11.1332	µm	Spot	Position	1		DAPI-	2555
98071.8	39360.3	11.3533	µm	Spot	Position	1		DAPI-	2558
98105.6	39388.7	10.8887	µm	Spot	Position	1		DAPI-	2567
98080.9	39388.8	11.3585	µm	Spot	Position	1		DAPI-	2568
98125.3	39415.6	11.233	µm	Spot	Position	1		DAPI-	2623
98153	39420.5	11.3604	µm	Spot	Position	1		DAPI-	2625
98127.9	39416.7	11.7171	µm	Spot	Position	1		DAPI-	2638
98202.6	39464.5	10.9033	µm	Spot	Position	1		DAPI-	2682
98199.8	39460.4	11.5212	µm	Spot	Position	1		DAPI-	2693
98228.6	39483	10.892	µm	Spot	Position	1		DAPI-	2698
98218.8	39487.2	10.8083	µm	Spot	Position	1		DAPI-	2699
98234.8	39487.5	11.2485	µm	Spot	Position	1		DAPI-	2701
98229.6	39475.6	11.6187	µm	Spot	Position	1		DAPI-	2704
98242.6	39503.8	11.0733	µm	Spot	Position	1		DAPI-	2735
98254	39488.2	11.2182	µm	Spot	Position	1		DAPI-	2736
98258.5	39498.9	11.262	µm	Spot	Position	1		DAPI-	2738
98257.5	39501.3	11.1516	µm	Spot	Position	1		DAPI-	2739
98238.2	39501.6	11.3457	µm	Spot	Position	1		DAPI-	2740
98261.9	39503.7	11.2184	µm	Spot	Position	1		DAPI-	2741
98256.7	39492.4	11.7655	µm	Spot	Position	1		DAPI-	2746
98232.9	39494.7	11.8532	µm	Spot	Position	1		DAPI-	2747
98244.8	39504.4	11.835	µm	Spot	Position	1		DAPI-	2749
98272.6	39502.1	10.9505	µm	Spot	Position	1		DAPI-	2753
98296.1	39511.7	11.5013	µm	Spot	Position	1		DAPI-	2762
98305.3	39530.9	11.6938	µm	Spot	Position	1		DAPI-	2763
98283.4	39506.8	11.7972	µm	Spot	Position	1		DAPI-	2764
98308	39520.5	11.7839	µm	Spot	Position	1		DAPI-	2766
98272.7	39523.2	11.9689	µm	Spot	Position	1		DAPI-	2767
98313.5	39526.5	10.916	µm	Spot	Position	1		DAPI-	2768
98344.7	39527.5	11.8824	µm	Spot	Position	1		DAPI-	2774
98322.4	39548	11.2814	µm	Spot	Position	1		DAPI-	2840
98324.7	39555.2	11.6601	µm	Spot	Position	1		DAPI-	2843
98316.8	39558.4	11.5131	µm	Spot	Position	1		DAPI-	2845
98365.3	39541.2	11.075	µm	Spot	Position	1		DAPI-	2852
98397.1	39549.3	10.9895	µm	Spot	Position	1		DAPI-	2853
98398	39575.4	11.2619	µm	Spot	Position	1		DAPI-	2861
98392.2	39576.8	11.2045	µm	Spot	Position	1		DAPI-	2862
98392.6	39547.9	11.629	µm	Spot	Position	1		DAPI-	2864
98388.3	39579.6	11.8865	µm	Spot	Position	1		DAPI-	2882
98453.6	39556.5	10.8233	µm	Spot	Position	1		DAPI-	2893
98455.5	39560.9	10.9767	µm	Spot	Position	1		DAPI-	2894
98475.2	39562.7	11.2011	µm	Spot	Position	1		DAPI-	2900
98459.7	39558	11.5817	µm	Spot	Position	1		DAPI-	2907
98449.3	39560.3	11.9688	µm	Spot	Position	1		DAPI-	2914
98490.3	39561.2	11.8156	µm	Spot	Position	1		DAPI-	2915
98524.3	39568.1	10.8787	µm	Spot	Position	1		DAPI-	2920
98539	39571.5	10.8428	µm	Spot	Position	1		DAPI-	2921
98501.2	39573	10.9613	µm	Spot	Position	1		DAPI-	2922
98525.5	39566.5	11.9852	µm	Spot	Position	1		DAPI-	2930
98528	39567.2	11.9153	µm	Spot	Position	1		DAPI-	2931
98497.7	39593.5	11.1305	µm	Spot	Position	1		DAPI-	3015
98518.7	39585.7	11.7175	µm	Spot	Position	1		DAPI-	3027
98547.5	39592.8	10.9141	µm	Spot	Position	1		DAPI-	3038
98552.6	39597.3	10.9651	µm	Spot	Position	1		DAPI-	3040
98617.2	39611.6	11.0576	µm	Spot	Position	1		DAPI-	3071
98609.5	39605.9	11.3785	µm	Spot	Position	1		DAPI-	3073
98633	39597.5	11.458	µm	Spot	Position	1		DAPI-	3074
98618	39615.1	11.6463	µm	Spot	Position	1		DAPI-	3075
98686.3	39604.9	10.8471	µm	Spot	Position	1		DAPI-	3081
98721.7	39606	11.1011	µm	Spot	Position	1		DAPI-	3082
98681.8	39607.3	10.9428	µm	Spot	Position	1		DAPI-	3083
98694.1	39609.2	11.0933	µm	Spot	Position	1		DAPI-	3084
98682.2	39609.9	10.8437	µm	Spot	Position	1		DAPI-	3085
98717.1	39614.3	10.8848	µm	Spot	Position	1		DAPI-	3087
98701.1	39614.8	11.1013	µm	Spot	Position	1		DAPI-	3088
98712.5	39618.7	10.9454	µm	Spot	Position	1		DAPI-	3089
98712.9	39623.8	11.0053	µm	Spot	Position	1		DAPI-	3090
98715	39604.9	11.3151	µm	Spot	Position	1		DAPI-	3093
98680.6	39612.1	11.2519	µm	Spot	Position	1		DAPI-	3094
98680.5	39613.5	11.3132	µm	Spot	Position	1		DAPI-	3096
98717.4	39611.8	11.5844	µm	Spot	Position	1		DAPI-	3103
98700.5	39600.8	11.9298	µm	Spot	Position	1		DAPI-	3108
98684.3	39604.7	12.0078	µm	Spot	Position	1		DAPI-	3109
98718.8	39608.4	11.7262	µm	Spot	Position	1		DAPI-	3110
98715.5	39612.7	11.9513	µm	Spot	Position	1		DAPI-	3112
98731.1	39618.5	11.3173	µm	Spot	Position	1		DAPI-	3117
97922	38312.6	12.3371	µm	Spot	Position	1		DAPI-	3238
97930.1	38338.3	13.1594	µm	Spot	Position	1		DAPI-	3257
97949.1	38392.9	12.1587	µm	Spot	Position	1		DAPI-	3289
97948.9	38392	12.3937	µm	Spot	Position	1		DAPI-	3291
97950.2	38479.4	12.198	µm	Spot	Position	1		DAPI-	3317
97947.8	38510.4	12.4839	µm	Spot	Position	1		DAPI-	3318
97946.7	38619.6	12.133	µm	Spot	Position	1		DAPI-	3379
97957.7	38738.6	12.1219	µm	Spot	Position	1		DAPI-	3446
97954.2	38782.3	12.0662	µm	Spot	Position	1		DAPI-	3475
97950.6	38768.9	12.7646	µm	Spot	Position	1		DAPI-	3479
97947	38786.3	13.1449	µm	Spot	Position	1		DAPI-	3481
97949.3	38876	12.0685	µm	Spot	Position	1		DAPI-	3539
97950.9	38879.3	12.8392	µm	Spot	Position	1		DAPI-	3542
97948.9	38948	12.0474	µm	Spot	Position	1		DAPI-	3624
97949.1	38957.7	12.4446	µm	Spot	Position	1		DAPI-	3626
97946.6	38994.3	12.1894	µm	Spot	Position	1		DAPI-	3668
97945.6	39059	12.4407	µm	Spot	Position	1		DAPI-	3721
97950.2	39080.4	12.7353	µm	Spot	Position	1		DAPI-	3771
97949.4	39120.5	12.2163	µm	Spot	Position	1		DAPI-	3862
97943.6	39141.7	12.1204	µm	Spot	Position	1		DAPI-	3863
97942.1	39137.7	12.9454	µm	Spot	Position	1		DAPI-	3878
97958.2	39161.6	12.9142	µm	Spot	Position	1		DAPI-	3882
97973.2	39196.6	12.6163	µm	Spot	Position	1		DAPI-	3989
97979.6	39209.6	13.0591	µm	Spot	Position	1		DAPI-	3994
97997.1	39253	12.621	µm	Spot	Position	1		DAPI-	4099
97997.5	39255.6	12.9046	µm	Spot	Position	1		DAPI-	4100
97940.7	39296.4	12.2289	µm	Spot	Position	1		DAPI-	4170
97945.3	39297.9	12.5242	µm	Spot	Position	1		DAPI-	4181
97965.2	39302.1	12.6437	µm	Spot	Position	1		DAPI-	4187
98009.1	39269	12.1082	µm	Spot	Position	1		DAPI-	4192
98022.3	39291.5	12.1771	µm	Spot	Position	1		DAPI-	4194
98003.4	39270.9	12.4571	µm	Spot	Position	1		DAPI-	4196
97988.9	39279.9	12.6422	µm	Spot	Position	1		DAPI-	4201
98017.5	39287.5	13.0493	µm	Spot	Position	1		DAPI-	4209
97995.8	39334.6	12.2647	µm	Spot	Position	1		DAPI-	4267
98053.3	39345.3	12.21	µm	Spot	Position	1		DAPI-	4292
98080.7	39386.9	12.2784	µm	Spot	Position	1		DAPI-	4382
98134.2	39413.7	12.4745	µm	Spot	Position	1		DAPI-	4473
98191	39441.2	12.5865	µm	Spot	Position	1		DAPI-	4488
98220.9	39469.4	12.0838	µm	Spot	Position	1		DAPI-	4591
98234.7	39485.2	12.152	µm	Spot	Position	1		DAPI-	4593
98219.8	39486.9	12.3939	µm	Spot	Position	1		DAPI-	4595
98222.1	39468.7	12.8118	µm	Spot	Position	1		DAPI-	4596
98231.3	39479.7	12.8761	µm	Spot	Position	1		DAPI-	4598
98237.2	39481	13.056	µm	Spot	Position	1		DAPI-	4601
98259	39496.1	12.8554	µm	Spot	Position	1		DAPI-	4671
98240.4	39503.3	12.8999	µm	Spot	Position	1		DAPI-	4672
98275.1	39501	12.4695	µm	Spot	Position	1		DAPI-	4684
98302.2	39518.3	12.6665	µm	Spot	Position	1		DAPI-	4689
98305.1	39520.4	12.6743	µm	Spot	Position	1		DAPI-	4690
98304.9	39521.7	12.7258	µm	Spot	Position	1		DAPI-	4691
98303	39516.9	13.2047	µm	Spot	Position	1		DAPI-	4698
98344.5	39530.9	13.0167	µm	Spot	Position	1		DAPI-	4712
98351.3	39538.5	12.1863	µm	Spot	Position	1		DAPI-	4828
98352.2	39563.6	13.0549	µm	Spot	Position	1		DAPI-	4847
98368.9	39565.8	12.5341	µm	Spot	Position	1		DAPI-	4861
98422.3	39571.9	12.1816	µm	Spot	Position	1		DAPI-	4876
98460.3	39561.4	12.1109	µm	Spot	Position	1		DAPI-	4890
98461.5	39563.3	12.0652	µm	Spot	Position	1		DAPI-	4891
98475.8	39560.7	12.8137	µm	Spot	Position	1		DAPI-	4900
98457	39558.4	13.1596	µm	Spot	Position	1		DAPI-	4902
98527.3	39564.2	12.0473	µm	Spot	Position	1		DAPI-	4911
98502.1	39567.2	12.1815	µm	Spot	Position	1		DAPI-	4912
98503.3	39567.2	12.4347	µm	Spot	Position	1		DAPI-	4916
98500.9	39570.3	12.6613	µm	Spot	Position	1		DAPI-	4924
98614.3	39606.6	12.2154	µm	Spot	Position	1		DAPI-	5093
98601.8	39589.3	12.623	µm	Spot	Position	1		DAPI-	5104
98609.7	39596.9	12.8446	µm	Spot	Position	1		DAPI-	5107
98679.5	39605.4	12.2524	µm	Spot	Position	1		DAPI-	5124
98720.5	39606.6	12.0699	µm	Spot	Position	1		DAPI-	5125
98697.3	39608	12.1188	µm	Spot	Position	1		DAPI-	5126
98698.1	39610.9	12.2801	µm	Spot	Position	1		DAPI-	5127
98690	39613.5	12.6894	µm	Spot	Position	1		DAPI-	5139
98705.6	39614.2	12.8294	µm	Spot	Position	1		DAPI-	5140
98681.1	39607.2	13.1672	µm	Spot	Position	1		DAPI-	5147
98704.3	39613.5	12.9524	µm	Spot	Position	1		DAPI-	5149
98726.2	39606.1	12.2565	µm	Spot	Position	1		DAPI-	5151
98748.4	39617	12.2485	µm	Spot	Position	1		DAPI-	5152
98725.8	39604.1	12.6856	µm	Spot	Position	1		DAPI-	5154
98736.7	39613.3	12.7797	µm	Spot	Position	1		DAPI-	5155
97954.5	38438.5	13.9355	µm	Spot	Position	1		DAPI-	5414
97952.4	38432.4	14.1419	µm	Spot	Position	1		DAPI-	5415
97954.7	38769.7	13.9352	µm	Spot	Position	1		DAPI-	5674
97945.4	38783.7	13.9876	µm	Spot	Position	1		DAPI-	5676
97930	38955.5	13.6817	µm	Spot	Position	1		DAPI-	5874
97947.8	38944.2	14.0558	µm	Spot	Position	1		DAPI-	5884
97946.2	39024.1	14.1945	µm	Spot	Position	1		DAPI-	5951
97916.8	39069.2	14.2351	µm	Spot	Position	1		DAPI-	6001
97949.9	39041.9	13.29	µm	Spot	Position	1		DAPI-	6004
97948.6	39084.2	13.398	µm	Spot	Position	1		DAPI-	6077
97967.3	39178.5	13.2809	µm	Spot	Position	1		DAPI-	6283
97969.8	39198	13.8211	µm	Spot	Position	1		DAPI-	6297
97976.6	39211.1	13.7268	µm	Spot	Position	1		DAPI-	6412
97997.8	39247.7	13.714	µm	Spot	Position	1		DAPI-	6428
97999.4	39251.5	13.6804	µm	Spot	Position	1		DAPI-	6429
97999.3	39257.1	14.2774	µm	Spot	Position	1		DAPI-	6431
98028.3	39302.5	13.5344	µm	Spot	Position	1		DAPI-	6533
98029.5	39302.5	13.9893	µm	Spot	Position	1		DAPI-	6540
98002.8	39261.9	14.332	µm	Spot	Position	1		DAPI-	6541
98023.8	39292.9	14.3799	µm	Spot	Position	1		DAPI-	6549
97993.7	39318.7	13.6863	µm	Spot	Position	1		DAPI-	6607
97990.6	39330	13.7586	µm	Spot	Position	1		DAPI-	6609
98036.1	39312.7	13.3062	µm	Spot	Position	1		DAPI-	6626
98060.3	39347.5	13.244	µm	Spot	Position	1		DAPI-	6630
98035.3	39311.1	13.9217	µm	Spot	Position	1		DAPI-	6636
98082.4	39373.9	13.5069	µm	Spot	Position	1		DAPI-	6721
98082.1	39367.1	13.8772	µm	Spot	Position	1		DAPI-	6733
98085.8	39368.2	14.3216	µm	Spot	Position	1		DAPI-	6735
98116.5	39421.7	14.2825	µm	Spot	Position	1		DAPI-	6807
98130.8	39426.2	13.5481	µm	Spot	Position	1		DAPI-	6816
98138.2	39439.7	14.3479	µm	Spot	Position	1		DAPI-	6830
98235.2	39480.1	13.8874	µm	Spot	Position	1		DAPI-	6960
98260.3	39492.9	13.5556	µm	Spot	Position	1		DAPI-	7022
98242.8	39502.9	14.0375	µm	Spot	Position	1		DAPI-	7024
98279.5	39502.9	13.3922	µm	Spot	Position	1		DAPI-	7030
98298.8	39518.2	13.2871	µm	Spot	Position	1		DAPI-	7033
98264.4	39495.8	13.6861	µm	Spot	Position	1		DAPI-	7035
98269.9	39497.7	13.6584	µm	Spot	Position	1		DAPI-	7036
98299.2	39515.3	13.5971	µm	Spot	Position	1		DAPI-	7039
98317.1	39523	13.3118	µm	Spot	Position	1		DAPI-	7049
98326	39523.9	13.5635	µm	Spot	Position	1		DAPI-	7053
98330.5	39527.8	13.8031	µm	Spot	Position	1		DAPI-	7054
98376.9	39542.6	13.25	µm	Spot	Position	1		DAPI-	7188
98366.9	39565.1	13.4495	µm	Spot	Position	1		DAPI-	7192
98387.4	39545.4	13.6762	µm	Spot	Position	1		DAPI-	7194
98394	39578.3	13.8149	µm	Spot	Position	1		DAPI-	7205
98372.2	39542.2	14.1823	µm	Spot	Position	1		DAPI-	7206
98418.6	39551.2	13.671	µm	Spot	Position	1		DAPI-	7219
98424.3	39568.8	13.5775	µm	Spot	Position	1		DAPI-	7223
98413.9	39549.2	14.2928	µm	Spot	Position	1		DAPI-	7231
98487.4	39596.9	13.919	µm	Spot	Position	1		DAPI-	7383
98516.6	39588.1	13.7854	µm	Spot	Position	1		DAPI-	7396
98616.1	39611.9	13.796	µm	Spot	Position	1		DAPI-	7423
98633.1	39608.5	14.1675	µm	Spot	Position	1		DAPI-	7432
98645.8	39607.1	13.7036	µm	Spot	Position	1		DAPI-	7435
98637.6	39605.6	14.37	µm	Spot	Position	1		DAPI-	7439
98699.9	39600.5	13.4943	µm	Spot	Position	1		DAPI-	7444
98723.8	39606.3	13.8887	µm	Spot	Position	1		DAPI-	7449
98736.6	39602.5	13.6335	µm	Spot	Position	1		DAPI-	7460
98727.2	39602.5	14.0226	µm	Spot	Position	1		DAPI-	7462
98739.1	39608.7	13.9716	µm	Spot	Position	1		DAPI-	7464
98739.4	39617.6	14.3631	µm	Spot	Position	1		DAPI-	7470
97952.6	38406.7	15.3145	µm	Spot	Position	1		DAPI-	7703
97956.6	38793.7	14.9744	µm	Spot	Position	1		DAPI-	8011
97922.7	39006.8	14.7269	µm	Spot	Position	1		DAPI-	8327
97926.4	38995.1	15.5047	µm	Spot	Position	1		DAPI-	8340
97952.2	39003.6	14.8158	µm	Spot	Position	1		DAPI-	8344
97946.5	39066.9	14.6873	µm	Spot	Position	1		DAPI-	8414
97948.7	39066.2	14.96	µm	Spot	Position	1		DAPI-	8416
97944.4	39064.3	15.2539	µm	Spot	Position	1		DAPI-	8420
97941.4	39066.5	15.463	µm	Spot	Position	1		DAPI-	8423
97918.7	39107.2	15.3425	µm	Spot	Position	1		DAPI-	8499
97946.8	39082	14.4172	µm	Spot	Position	1		DAPI-	8501
97949.3	39091.1	15.036	µm	Spot	Position	1		DAPI-	8508
97948.8	39086.6	15.3217	µm	Spot	Position	1		DAPI-	8511
97969.6	39195.2	14.6303	µm	Spot	Position	1		DAPI-	8684
97966.1	39165	15.486	µm	Spot	Position	1		DAPI-	8692
97995.7	39246.5	14.7831	µm	Spot	Position	1		DAPI-	8786
97997.2	39240.4	15.3681	µm	Spot	Position	1		DAPI-	8791
98001.3	39260.8	14.4724	µm	Spot	Position	1		DAPI-	8886
97993.6	39318.1	15.2051	µm	Spot	Position	1		DAPI-	8988
98056.2	39346.1	14.8817	µm	Spot	Position	1		DAPI-	8999
98096.6	39373.4	14.6147	µm	Spot	Position	1		DAPI-	9081
98086.4	39374.2	14.4448	µm	Spot	Position	1		DAPI-	9082
98083.4	39366.8	14.8636	µm	Spot	Position	1		DAPI-	9088
98086	39372.2	15.0397	µm	Spot	Position	1		DAPI-	9091
98210.5	39456.2	15.1209	µm	Spot	Position	1		DAPI-	9283
98226.4	39473.1	15.5613	µm	Spot	Position	1		DAPI-	9296
98299.4	39514.1	15.1681	µm	Spot	Position	1		DAPI-	9382
98320.2	39524.8	14.9302	µm	Spot	Position	1		DAPI-	9390
98353.1	39531.6	15.2416	µm	Spot	Position	1		DAPI-	9394
98346.8	39563.6	14.5386	µm	Spot	Position	1		DAPI-	9503
98338.4	39563.3	15.2342	µm	Spot	Position	1		DAPI-	9507
98539.9	39573.2	15.4167	µm	Spot	Position	1		DAPI-	9568
98597.7	39587.4	14.5642	µm	Spot	Position	1		DAPI-	9709
98620.4	39603	14.4341	µm	Spot	Position	1		DAPI-	9714
98624.5	39605.6	14.6586	µm	Spot	Position	1		DAPI-	9716
98644.4	39606.7	15.3941	µm	Spot	Position	1		DAPI-	9735
98706	39611.1	14.487	µm	Spot	Position	1		DAPI-	9739
98708.8	39611.9	15.0695	µm	Spot	Position	1		DAPI-	9746
98728.3	39604	15.0226	µm	Spot	Position	1		DAPI-	9750
97953.1	38409.8	15.905	µm	Spot	Position	1		DAPI-	9910
97956.7	38714.6	15.7457	µm	Spot	Position	1		DAPI-	9998
97953	38972	15.6193	µm	Spot	Position	1		DAPI-	10064
98647.1	39619.1	15.6313	µm	Spot	Position	1		DAPI-	10322
98736.5	39617.9	15.9404	µm	Spot	Position	1		DAPI-	10333
98435.9	39566.4	1.26463	µm	Spot	Position	1	DCX-	DAPI+	0
98418.6	39562.5	2.50278	µm	Spot	Position	1	DCX-	DAPI+	2
98437.7	39566.2	3.27885	µm	Spot	Position	1	DCX-	DAPI+	3
97946.3	39209.1	4.37005	µm	Spot	Position	1	DCX-	DAPI+	9
97967	39231.9	3.74021	µm	Spot	Position	1	DCX-	DAPI+	10
97953.6	39240.3	4.38212	µm	Spot	Position	1	DCX-	DAPI+	11
98079.4	39372.6	4.56064	µm	Spot	Position	1	DCX-	DAPI+	12
98487	39572.9	4.63467	µm	Spot	Position	1	DCX-	DAPI+	14
97952.9	39206.9	5.76626	µm	Spot	Position	1	DCX-	DAPI+	17
97957.3	39224.8	5.13024	µm	Spot	Position	1	DCX-	DAPI+	19
97955.3	39225.1	5.25584	µm	Spot	Position	1	DCX-	DAPI+	20
97966.8	39226.4	5.85352	µm	Spot	Position	1	DCX-	DAPI+	22
98046.9	39361.8	5.66775	µm	Spot	Position	1	DCX-	DAPI+	24
98435.7	39571.4	5.28708	µm	Spot	Position	1	DCX-	DAPI+	26
98441.1	39570.9	5.91756	µm	Spot	Position	1	DCX-	DAPI+	28
97944.1	39210	6.88523	µm	Spot	Position	1	DCX-	DAPI+	40
97951.6	39199.3	7.13912	µm	Spot	Position	1	DCX-	DAPI+	42
97924.8	39229	6.7318	µm	Spot	Position	1	DCX-	DAPI+	44
97939.9	39230.9	6.83795	µm	Spot	Position	1	DCX-	DAPI+	45
97954.1	39216.5	6.53854	µm	Spot	Position	1	DCX-	DAPI+	48
97942.6	39219.2	6.39753	µm	Spot	Position	1	DCX-	DAPI+	49
97941.6	39219.6	6.30936	µm	Spot	Position	1	DCX-	DAPI+	50
97964.5	39234.7	6.31265	µm	Spot	Position	1	DCX-	DAPI+	51
97954.5	39245.9	6.61554	µm	Spot	Position	1	DCX-	DAPI+	54
97967.5	39249.8	6.65084	µm	Spot	Position	1	DCX-	DAPI+	55
97954.7	39212.5	6.95729	µm	Spot	Position	1	DCX-	DAPI+	56
97944.2	39219	6.94788	µm	Spot	Position	1	DCX-	DAPI+	57
97941.3	39221.7	7.17057	µm	Spot	Position	1	DCX-	DAPI+	59
97965.3	39235.5	7.07054	µm	Spot	Position	1	DCX-	DAPI+	61
97966.9	39236.3	7.02015	µm	Spot	Position	1	DCX-	DAPI+	62
97950.6	39242.1	7.06852	µm	Spot	Position	1	DCX-	DAPI+	64
97961.8	39276.3	6.06007	µm	Spot	Position	1	DCX-	DAPI+	66
97963.3	39268.6	6.50126	µm	Spot	Position	1	DCX-	DAPI+	67
97959.1	39278	6.95399	µm	Spot	Position	1	DCX-	DAPI+	68
98016.1	39313.8	6.1688	µm	Spot	Position	1	DCX-	DAPI+	70
98031.6	39329.4	7.11787	µm	Spot	Position	1	DCX-	DAPI+	71
98046.2	39354.6	6.75865	µm	Spot	Position	1	DCX-	DAPI+	72
98045.9	39356	6.71245	µm	Spot	Position	1	DCX-	DAPI+	73
98046.3	39357.8	6.72817	µm	Spot	Position	1	DCX-	DAPI+	74
98046.7	39358.8	6.7239	µm	Spot	Position	1	DCX-	DAPI+	75
98100.3	39394.1	7.16152	µm	Spot	Position	1	DCX-	DAPI+	76
98125	39403.8	6.21927	µm	Spot	Position	1	DCX-	DAPI+	77
98123.2	39407	6.17791	µm	Spot	Position	1	DCX-	DAPI+	78
98127.1	39402.5	6.29357	µm	Spot	Position	1	DCX-	DAPI+	79
98346.8	39550.9	6.98633	µm	Spot	Position	1	DCX-	DAPI+	80
98372.2	39567.5	6.14163	µm	Spot	Position	1	DCX-	DAPI+	82
98378.3	39569.9	6.40783	µm	Spot	Position	1	DCX-	DAPI+	84
98372.4	39570	6.31395	µm	Spot	Position	1	DCX-	DAPI+	85
98368.5	39559.8	6.6376	µm	Spot	Position	1	DCX-	DAPI+	87
98367.4	39560.2	6.68917	µm	Spot	Position	1	DCX-	DAPI+	88
98373.8	39573.7	6.77529	µm	Spot	Position	1	DCX-	DAPI+	89
98386.4	39559.1	7.00496	µm	Spot	Position	1	DCX-	DAPI+	92
98419.7	39567.4	6.3011	µm	Spot	Position	1	DCX-	DAPI+	95
98435	39568.8	6.27716	µm	Spot	Position	1	DCX-	DAPI+	96
98438.6	39573.4	6.45713	µm	Spot	Position	1	DCX-	DAPI+	97
98452.5	39575.1	7.02189	µm	Spot	Position	1	DCX-	DAPI+	98
97930.8	39175	7.69986	µm	Spot	Position	1	DCX-	DAPI+	140
97933.5	39203.7	7.98086	µm	Spot	Position	1	DCX-	DAPI+	144
97932.5	39208.2	8.10475	µm	Spot	Position	1	DCX-	DAPI+	145
97934.7	39208.6	8.03357	µm	Spot	Position	1	DCX-	DAPI+	146
97935.5	39188.4	8.23704	µm	Spot	Position	1	DCX-	DAPI+	150
97932.9	39195.5	8.29828	µm	Spot	Position	1	DCX-	DAPI+	151
97961.3	39203.9	7.32914	µm	Spot	Position	1	DCX-	DAPI+	153
97951.7	39184.4	7.73439	µm	Spot	Position	1	DCX-	DAPI+	154
97955.4	39191.6	7.77113	µm	Spot	Position	1	DCX-	DAPI+	155
97941.3	39207.1	7.62753	µm	Spot	Position	1	DCX-	DAPI+	156
97941.2	39205.5	7.81126	µm	Spot	Position	1	DCX-	DAPI+	158
97956.6	39193.8	8.18816	µm	Spot	Position	1	DCX-	DAPI+	160
97959.1	39193.8	8.37803	µm	Spot	Position	1	DCX-	DAPI+	161
97935.8	39220.7	7.3775	µm	Spot	Position	1	DCX-	DAPI+	163
97933.4	39214.4	7.65497	µm	Spot	Position	1	DCX-	DAPI+	166
97938.7	39216.8	7.65619	µm	Spot	Position	1	DCX-	DAPI+	167
97936.6	39216.5	8.04009	µm	Spot	Position	1	DCX-	DAPI+	169
97938.8	39214.6	8.29936	µm	Spot	Position	1	DCX-	DAPI+	171
97969	39228.5	7.4364	µm	Spot	Position	1	DCX-	DAPI+	175
97953.4	39249.3	7.32685	µm	Spot	Position	1	DCX-	DAPI+	178
97980.2	39254.3	7.26494	µm	Spot	Position	1	DCX-	DAPI+	179
97953.8	39213.9	7.6553	µm	Spot	Position	1	DCX-	DAPI+	180
97958.3	39217	7.7746	µm	Spot	Position	1	DCX-	DAPI+	181
97960.1	39220.7	7.77818	µm	Spot	Position	1	DCX-	DAPI+	182
97967	39233.8	7.57163	µm	Spot	Position	1	DCX-	DAPI+	184
97963.1	39241.9	7.72428	µm	Spot	Position	1	DCX-	DAPI+	186
97963.3	39221	8.07222	µm	Spot	Position	1	DCX-	DAPI+	188
97951.7	39246.9	7.88405	µm	Spot	Position	1	DCX-	DAPI+	189
97965.7	39214.2	8.19394	µm	Spot	Position	1	DCX-	DAPI+	190
97966.8	39219.7	8.27741	µm	Spot	Position	1	DCX-	DAPI+	192
97970.2	39235	8.33036	µm	Spot	Position	1	DCX-	DAPI+	194
97958.6	39249.9	8.35603	µm	Spot	Position	1	DCX-	DAPI+	196
97965.7	39253.2	8.40553	µm	Spot	Position	1	DCX-	DAPI+	198
97959.3	39255.6	8.25099	µm	Spot	Position	1	DCX-	DAPI+	199
97926.3	39266.5	8.19583	µm	Spot	Position	1	DCX-	DAPI+	202
97971.5	39293.4	7.34626	µm	Spot	Position	1	DCX-	DAPI+	204
97958.4	39258.4	7.72388	µm	Spot	Position	1	DCX-	DAPI+	205
97966.8	39281.7	7.7486	µm	Spot	Position	1	DCX-	DAPI+	206
97975.9	39258.3	8.05237	µm	Spot	Position	1	DCX-	DAPI+	207
97960.7	39274	7.81637	µm	Spot	Position	1	DCX-	DAPI+	209
97960.7	39278.6	7.87661	µm	Spot	Position	1	DCX-	DAPI+	210
97969.1	39288.4	7.90174	µm	Spot	Position	1	DCX-	DAPI+	211
97956.3	39260.3	8.28403	µm	Spot	Position	1	DCX-	DAPI+	212
98008.2	39315.4	7.25445	µm	Spot	Position	1	DCX-	DAPI+	221
98013	39312.4	7.74115	µm	Spot	Position	1	DCX-	DAPI+	222
98010.8	39316	7.71254	µm	Spot	Position	1	DCX-	DAPI+	223
98013.9	39334	7.58753	µm	Spot	Position	1	DCX-	DAPI+	224
98026.1	39346.8	7.70002	µm	Spot	Position	1	DCX-	DAPI+	225
98026.3	39349.4	7.77206	µm	Spot	Position	1	DCX-	DAPI+	226
98011.7	39335.6	7.92456	µm	Spot	Position	1	DCX-	DAPI+	229
98030.9	39347.2	8.25275	µm	Spot	Position	1	DCX-	DAPI+	231
98033.8	39330.7	7.71718	µm	Spot	Position	1	DCX-	DAPI+	232
98039.1	39332.9	8.22871	µm	Spot	Position	1	DCX-	DAPI+	236
98041.3	39340.9	8.18135	µm	Spot	Position	1	DCX-	DAPI+	238
98065.4	39361.4	7.4404	µm	Spot	Position	1	DCX-	DAPI+	239
98066.2	39363.1	7.40916	µm	Spot	Position	1	DCX-	DAPI+	240
98046.2	39362.8	7.67531	µm	Spot	Position	1	DCX-	DAPI+	241
98053.4	39362.9	7.6643	µm	Spot	Position	1	DCX-	DAPI+	242
98064.9	39364.3	7.66779	µm	Spot	Position	1	DCX-	DAPI+	243
98061.1	39357.3	8.23075	µm	Spot	Position	1	DCX-	DAPI+	245
98061.1	39358.7	8.1726	µm	Spot	Position	1	DCX-	DAPI+	246
98098.3	39390.5	7.23028	µm	Spot	Position	1	DCX-	DAPI+	247
98102.1	39394.7	7.75986	µm	Spot	Position	1	DCX-	DAPI+	248
98110.4	39412.8	7.51744	µm	Spot	Position	1	DCX-	DAPI+	254
98109.4	39414.4	7.7381	µm	Spot	Position	1	DCX-	DAPI+	256
98109.5	39407.4	7.91002	µm	Spot	Position	1	DCX-	DAPI+	257
98106.6	39410.6	7.93343	µm	Spot	Position	1	DCX-	DAPI+	258
98120.1	39416.5	8.35523	µm	Spot	Position	1	DCX-	DAPI+	261
98136.1	39429.4	8.28104	µm	Spot	Position	1	DCX-	DAPI+	263
98340.2	39552	7.67836	µm	Spot	Position	1	DCX-	DAPI+	270
98338.9	39549.8	7.95475	µm	Spot	Position	1	DCX-	DAPI+	273
98374.5	39552.2	7.36514	µm	Spot	Position	1	DCX-	DAPI+	274
98392.2	39561	7.30535	µm	Spot	Position	1	DCX-	DAPI+	275
98369.4	39566.7	7.33678	µm	Spot	Position	1	DCX-	DAPI+	276
98389.2	39574.5	7.21497	µm	Spot	Position	1	DCX-	DAPI+	277
98368.8	39557.9	7.69148	µm	Spot	Position	1	DCX-	DAPI+	278
98391.5	39558.8	7.7686	µm	Spot	Position	1	DCX-	DAPI+	279
98382.9	39561.2	7.50861	µm	Spot	Position	1	DCX-	DAPI+	280
98394	39566.7	7.6391	µm	Spot	Position	1	DCX-	DAPI+	281
98379.2	39575.5	7.53528	µm	Spot	Position	1	DCX-	DAPI+	282
98389.7	39563.8	8.06967	µm	Spot	Position	1	DCX-	DAPI+	283
98369.2	39570.7	7.9385	µm	Spot	Position	1	DCX-	DAPI+	284
98395.5	39573.7	7.97655	µm	Spot	Position	1	DCX-	DAPI+	285
98382.3	39576.8	7.88124	µm	Spot	Position	1	DCX-	DAPI+	286
98381.7	39552.7	8.16576	µm	Spot	Position	1	DCX-	DAPI+	287
98369.9	39554.7	8.16349	µm	Spot	Position	1	DCX-	DAPI+	288
98375.6	39554.7	8.37214	µm	Spot	Position	1	DCX-	DAPI+	289
98389.4	39558.4	8.17383	µm	Spot	Position	1	DCX-	DAPI+	291
98361.5	39562.6	8.32063	µm	Spot	Position	1	DCX-	DAPI+	292
98364.9	39570.7	8.1312	µm	Spot	Position	1	DCX-	DAPI+	293
98386.4	39571.7	8.10853	µm	Spot	Position	1	DCX-	DAPI+	294
98377.7	39574	8.20557	µm	Spot	Position	1	DCX-	DAPI+	295
98402.5	39568.4	7.49974	µm	Spot	Position	1	DCX-	DAPI+	296
98406.7	39563.2	7.65098	µm	Spot	Position	1	DCX-	DAPI+	297
98434.9	39565.8	8.18126	µm	Spot	Position	1	DCX-	DAPI+	301
98417.7	39572.5	8.23253	µm	Spot	Position	1	DCX-	DAPI+	302
98439.6	39575.5	8.22652	µm	Spot	Position	1	DCX-	DAPI+	303
98481.3	39570.4	7.47552	µm	Spot	Position	1	DCX-	DAPI+	304
98462.5	39567.5	8.05527	µm	Spot	Position	1	DCX-	DAPI+	305
98466.7	39573.6	8.1767	µm	Spot	Position	1	DCX-	DAPI+	307
98486.8	39584.9	7.41158	µm	Spot	Position	1	DCX-	DAPI+	311
98467.2	39593.5	7.68542	µm	Spot	Position	1	DCX-	DAPI+	314
98492.5	39584.5	8.044	µm	Spot	Position	1	DCX-	DAPI+	318
98488.7	39589.2	8.20864	µm	Spot	Position	1	DCX-	DAPI+	322
98487.5	39590.2	8.19802	µm	Spot	Position	1	DCX-	DAPI+	323
98471.4	39595.1	8.31783	µm	Spot	Position	1	DCX-	DAPI+	324
98508.9	39586.1	7.73212	µm	Spot	Position	1	DCX-	DAPI+	325
98537.6	39593.5	7.56346	µm	Spot	Position	1	DCX-	DAPI+	326
98540.5	39594.5	7.66801	µm	Spot	Position	1	DCX-	DAPI+	327
98509.2	39580.9	8.03695	µm	Spot	Position	1	DCX-	DAPI+	328
98533.7	39592.9	8.16643	µm	Spot	Position	1	DCX-	DAPI+	330
98541.2	39584.9	7.93375	µm	Spot	Position	1	DCX-	DAPI+	332
98542.8	39587.5	8.12803	µm	Spot	Position	1	DCX-	DAPI+	333
98598.4	39601.8	7.816	µm	Spot	Position	1	DCX-	DAPI+	335
98719.3	39615.9	8.1814	µm	Spot	Position	1	DCX-	DAPI+	336
98722.5	39617.5	8.16403	µm	Spot	Position	1	DCX-	DAPI+	337
97916.9	38260.5	8.94451	µm	Spot	Position	1	DCX-	DAPI+	345
97938.4	38347.9	8.78233	µm	Spot	Position	1	DCX-	DAPI+	347
97934.2	38845.4	8.4413	µm	Spot	Position	1	DCX-	DAPI+	360
97935.4	38863.4	9.26325	µm	Spot	Position	1	DCX-	DAPI+	362
97927	39066	9.50993	µm	Spot	Position	1	DCX-	DAPI+	374
97930.2	39110.4	9.47687	µm	Spot	Position	1	DCX-	DAPI+	376
97929.1	39158.6	8.57733	µm	Spot	Position	1	DCX-	DAPI+	389
97934.7	39152.5	8.70948	µm	Spot	Position	1	DCX-	DAPI+	391
97926.6	39161.1	8.78304	µm	Spot	Position	1	DCX-	DAPI+	393
97928.2	39125.1	9.17103	µm	Spot	Position	1	DCX-	DAPI+	394
97928.9	39126.8	9.14085	µm	Spot	Position	1	DCX-	DAPI+	395
97927.3	39127.9	9.14601	µm	Spot	Position	1	DCX-	DAPI+	396
97931.9	39151.8	9.27521	µm	Spot	Position	1	DCX-	DAPI+	399
97935.4	39154.6	9.07116	µm	Spot	Position	1	DCX-	DAPI+	400
97934.1	39155.9	9.21085	µm	Spot	Position	1	DCX-	DAPI+	401
97928.9	39124.9	9.38484	µm	Spot	Position	1	DCX-	DAPI+	402
97935.4	39136.1	9.33909	µm	Spot	Position	1	DCX-	DAPI+	404
97929.8	39161.6	9.39327	µm	Spot	Position	1	DCX-	DAPI+	407
97942.1	39161.6	9.20308	µm	Spot	Position	1	DCX-	DAPI+	409
97924.3	39179.3	8.65084	µm	Spot	Position	1	DCX-	DAPI+	434
97935.8	39184.8	8.59977	µm	Spot	Position	1	DCX-	DAPI+	435
97921.3	39185.4	8.66038	µm	Spot	Position	1	DCX-	DAPI+	436
97930.2	39192.9	8.48651	µm	Spot	Position	1	DCX-	DAPI+	439
97937.2	39193.5	8.4124	µm	Spot	Position	1	DCX-	DAPI+	440
97937.2	39198.5	8.6972	µm	Spot	Position	1	DCX-	DAPI+	441
97923.9	39208.9	8.4866	µm	Spot	Position	1	DCX-	DAPI+	443
97926.5	39176.4	8.84675	µm	Spot	Position	1	DCX-	DAPI+	445
97925.3	39199.4	8.83434	µm	Spot	Position	1	DCX-	DAPI+	448
97926.1	39199.5	8.78581	µm	Spot	Position	1	DCX-	DAPI+	449
97926.7	39209.5	8.83729	µm	Spot	Position	1	DCX-	DAPI+	450
97930.1	39182.6	9.16468	µm	Spot	Position	1	DCX-	DAPI+	452
97927.1	39187	9.23557	µm	Spot	Position	1	DCX-	DAPI+	453
97930.9	39191	9.11722	µm	Spot	Position	1	DCX-	DAPI+	454
97937.5	39185.8	9.48827	µm	Spot	Position	1	DCX-	DAPI+	457
97938.5	39205	9.38176	µm	Spot	Position	1	DCX-	DAPI+	459
97952.8	39187.5	8.55905	µm	Spot	Position	1	DCX-	DAPI+	460
97961.4	39192.7	8.55787	µm	Spot	Position	1	DCX-	DAPI+	461
97951	39165.6	8.86597	µm	Spot	Position	1	DCX-	DAPI+	462
97961.9	39197.5	8.95185	µm	Spot	Position	1	DCX-	DAPI+	465
97962	39205.8	8.90517	µm	Spot	Position	1	DCX-	DAPI+	466
97955.3	39189.2	9.18731	µm	Spot	Position	1	DCX-	DAPI+	468
97957.1	39190.7	9.14615	µm	Spot	Position	1	DCX-	DAPI+	469
97961.2	39194.6	9.12882	µm	Spot	Position	1	DCX-	DAPI+	470
97963	39182	9.43892	µm	Spot	Position	1	DCX-	DAPI+	472
97946.2	39208.6	9.42515	µm	Spot	Position	1	DCX-	DAPI+	474
97932.6	39219.8	8.69611	µm	Spot	Position	1	DCX-	DAPI+	486
97923.4	39223.7	9.0438	µm	Spot	Position	1	DCX-	DAPI+	494
97935.9	39227.2	9.08441	µm	Spot	Position	1	DCX-	DAPI+	495
97931.9	39229.1	9.44667	µm	Spot	Position	1	DCX-	DAPI+	500
97938.3	39229.2	9.58205	µm	Spot	Position	1	DCX-	DAPI+	501
97959.7	39221.7	8.52731	µm	Spot	Position	1	DCX-	DAPI+	503
97981.5	39240.7	8.63334	µm	Spot	Position	1	DCX-	DAPI+	506
97952.8	39249.5	8.42165	µm	Spot	Position	1	DCX-	DAPI+	509
97942.2	39217.1	8.87216	µm	Spot	Position	1	DCX-	DAPI+	510
97956.3	39219.9	8.72291	µm	Spot	Position	1	DCX-	DAPI+	511
97971.9	39232.9	8.95593	µm	Spot	Position	1	DCX-	DAPI+	513
97968.5	39236.9	8.73717	µm	Spot	Position	1	DCX-	DAPI+	514
97984.7	39237	8.99963	µm	Spot	Position	1	DCX-	DAPI+	515
97952.4	39251.6	8.84639	µm	Spot	Position	1	DCX-	DAPI+	517
97969.4	39253.6	8.91521	µm	Spot	Position	1	DCX-	DAPI+	518
97961.3	39216.1	9.20976	µm	Spot	Position	1	DCX-	DAPI+	520
97968.4	39218.6	9.24312	µm	Spot	Position	1	DCX-	DAPI+	521
97943	39228.7	9.14204	µm	Spot	Position	1	DCX-	DAPI+	522
97944.3	39231.9	9.21391	µm	Spot	Position	1	DCX-	DAPI+	523
97986.6	39249.2	9.28507	µm	Spot	Position	1	DCX-	DAPI+	525
97956.6	39252.9	9.07382	µm	Spot	Position	1	DCX-	DAPI+	526
97955.6	39254.5	9.26767	µm	Spot	Position	1	DCX-	DAPI+	528
97964.9	39255.1	9.28344	µm	Spot	Position	1	DCX-	DAPI+	529
97961.6	39255.6	9.1952	µm	Spot	Position	1	DCX-	DAPI+	530
97960.6	39219.1	9.44663	µm	Spot	Position	1	DCX-	DAPI+	531
97982.5	39252.4	9.32927	µm	Spot	Position	1	DCX-	DAPI+	533
97978.4	39253	9.36713	µm	Spot	Position	1	DCX-	DAPI+	534
97988.3	39255.2	9.40956	µm	Spot	Position	1	DCX-	DAPI+	539
97923.8	39266.6	9.26042	µm	Spot	Position	1	DCX-	DAPI+	543
97926.5	39278.1	9.54519	µm	Spot	Position	1	DCX-	DAPI+	545
97931.7	39280.3	9.36642	µm	Spot	Position	1	DCX-	DAPI+	546
97935.1	39282.3	9.45044	µm	Spot	Position	1	DCX-	DAPI+	547
97967.6	39261.7	8.54414	µm	Spot	Position	1	DCX-	DAPI+	548
97983.7	39288.6	8.49586	µm	Spot	Position	1	DCX-	DAPI+	550
97983.6	39271.6	8.80294	µm	Spot	Position	1	DCX-	DAPI+	553
97960.3	39273	8.932	µm	Spot	Position	1	DCX-	DAPI+	554
97980	39285.4	8.85949	µm	Spot	Position	1	DCX-	DAPI+	555
97974	39300.7	8.79788	µm	Spot	Position	1	DCX-	DAPI+	556
97961.5	39264.1	9.04108	µm	Spot	Position	1	DCX-	DAPI+	558
97975.9	39264.4	9.15269	µm	Spot	Position	1	DCX-	DAPI+	559
97981.3	39283	9.1514	µm	Spot	Position	1	DCX-	DAPI+	561
97977.4	39289	9.02416	µm	Spot	Position	1	DCX-	DAPI+	564
97981.2	39290.7	9.10285	µm	Spot	Position	1	DCX-	DAPI+	565
97956.2	39293.3	9.15466	µm	Spot	Position	1	DCX-	DAPI+	566
97958.7	39258.2	9.4142	µm	Spot	Position	1	DCX-	DAPI+	567
97944.6	39285.5	9.43384	µm	Spot	Position	1	DCX-	DAPI+	569
97975	39297.3	9.48575	µm	Spot	Position	1	DCX-	DAPI+	570
97987.3	39262.6	8.6211	µm	Spot	Position	1	DCX-	DAPI+	571
97994.6	39302.6	8.5211	µm	Spot	Position	1	DCX-	DAPI+	573
97998.8	39266.1	9.01317	µm	Spot	Position	1	DCX-	DAPI+	575
97989	39274.4	9.02352	µm	Spot	Position	1	DCX-	DAPI+	576
97990	39275.6	9.30536	µm	Spot	Position	1	DCX-	DAPI+	577
97991.2	39289.1	9.5476	µm	Spot	Position	1	DCX-	DAPI+	581
97978.8	39317.4	8.94235	µm	Spot	Position	1	DCX-	DAPI+	583
97973.3	39311.7	9.43439	µm	Spot	Position	1	DCX-	DAPI+	586
98017.8	39307	8.61189	µm	Spot	Position	1	DCX-	DAPI+	588
97991.5	39304.3	8.93436	µm	Spot	Position	1	DCX-	DAPI+	589
98025.7	39310	8.74458	µm	Spot	Position	1	DCX-	DAPI+	590
98025.3	39311.6	8.98357	µm	Spot	Position	1	DCX-	DAPI+	591
98015.7	39326.9	8.98173	µm	Spot	Position	1	DCX-	DAPI+	592
98029.7	39329.1	8.90282	µm	Spot	Position	1	DCX-	DAPI+	593
98026	39332.2	8.81878	µm	Spot	Position	1	DCX-	DAPI+	595
98007.7	39335	8.99894	µm	Spot	Position	1	DCX-	DAPI+	596
98010	39336.8	8.84491	µm	Spot	Position	1	DCX-	DAPI+	597
98022.9	39342	8.82989	µm	Spot	Position	1	DCX-	DAPI+	598
98028.8	39342.4	8.99142	µm	Spot	Position	1	DCX-	DAPI+	599
98029.5	39344.5	8.95665	µm	Spot	Position	1	DCX-	DAPI+	600
98010.8	39333.6	9.04613	µm	Spot	Position	1	DCX-	DAPI+	601
98004.7	39318.6	9.55103	µm	Spot	Position	1	DCX-	DAPI+	606
98026.4	39348.9	9.47943	µm	Spot	Position	1	DCX-	DAPI+	610
98033.8	39343.4	8.72321	µm	Spot	Position	1	DCX-	DAPI+	611
98039.9	39330.2	9.14371	µm	Spot	Position	1	DCX-	DAPI+	613
98024.7	39351.6	9.28169	µm	Spot	Position	1	DCX-	DAPI+	619
98049.1	39363.2	8.50712	µm	Spot	Position	1	DCX-	DAPI+	622
98077.5	39392.7	8.47408	µm	Spot	Position	1	DCX-	DAPI+	623
98062.6	39356.9	8.88642	µm	Spot	Position	1	DCX-	DAPI+	625
98044.6	39358.8	8.90463	µm	Spot	Position	1	DCX-	DAPI+	626
98041.6	39350.9	9.21535	µm	Spot	Position	1	DCX-	DAPI+	627
98035	39352.4	9.06914	µm	Spot	Position	1	DCX-	DAPI+	628
98063.3	39360.2	9.25453	µm	Spot	Position	1	DCX-	DAPI+	629
98069.2	39362.1	9.18981	µm	Spot	Position	1	DCX-	DAPI+	630
98050.1	39365.4	9.23912	µm	Spot	Position	1	DCX-	DAPI+	631
98035.4	39356.3	9.55586	µm	Spot	Position	1	DCX-	DAPI+	632
98067.5	39372.7	9.34457	µm	Spot	Position	1	DCX-	DAPI+	634
98099.9	39391.1	8.76408	µm	Spot	Position	1	DCX-	DAPI+	636
98091.5	39399.3	8.436	µm	Spot	Position	1	DCX-	DAPI+	640
98118.6	39414.6	8.64165	µm	Spot	Position	1	DCX-	DAPI+	643
98101.5	39401.4	8.85759	µm	Spot	Position	1	DCX-	DAPI+	644
98122.9	39420.3	8.94819	µm	Spot	Position	1	DCX-	DAPI+	646
98111.9	39417.9	9.10855	µm	Spot	Position	1	DCX-	DAPI+	650
98125	39419	9.16688	µm	Spot	Position	1	DCX-	DAPI+	651
98106.7	39408	9.45792	µm	Spot	Position	1	DCX-	DAPI+	652
98118.2	39417.1	9.43392	µm	Spot	Position	1	DCX-	DAPI+	654
98117.5	39418.9	9.52949	µm	Spot	Position	1	DCX-	DAPI+	655
98129.8	39404.7	8.54247	µm	Spot	Position	1	DCX-	DAPI+	656
98127.7	39420.2	8.79421	µm	Spot	Position	1	DCX-	DAPI+	657
98129.5	39420.5	8.86736	µm	Spot	Position	1	DCX-	DAPI+	658
98141.1	39428.1	8.84579	µm	Spot	Position	1	DCX-	DAPI+	659
98139.4	39428.8	8.97619	µm	Spot	Position	1	DCX-	DAPI+	660
98150.1	39423.6	9.23304	µm	Spot	Position	1	DCX-	DAPI+	661
98146.5	39424.3	9.12551	µm	Spot	Position	1	DCX-	DAPI+	662
98136.8	39425.8	9.12579	µm	Spot	Position	1	DCX-	DAPI+	663
98149.5	39434.3	9.43226	µm	Spot	Position	1	DCX-	DAPI+	668
98166	39445.3	8.81216	µm	Spot	Position	1	DCX-	DAPI+	671
98174.4	39447.6	9.22075	µm	Spot	Position	1	DCX-	DAPI+	674
98173.5	39450.3	9.25689	µm	Spot	Position	1	DCX-	DAPI+	675
98188.3	39448.8	9.37093	µm	Spot	Position	1	DCX-	DAPI+	676
98185.1	39452.8	9.39756	µm	Spot	Position	1	DCX-	DAPI+	677
98184.1	39455.2	9.48098	µm	Spot	Position	1	DCX-	DAPI+	679
98188.5	39456.8	9.4867	µm	Spot	Position	1	DCX-	DAPI+	680
98231	39487.3	9.19179	µm	Spot	Position	1	DCX-	DAPI+	682
98226.1	39488.1	8.51563	µm	Spot	Position	1	DCX-	DAPI+	684
98241.8	39493.6	8.82477	µm	Spot	Position	1	DCX-	DAPI+	686
98256.6	39517.7	8.96137	µm	Spot	Position	1	DCX-	DAPI+	688
98244.2	39492.3	9.03883	µm	Spot	Position	1	DCX-	DAPI+	689
98247.8	39495.5	9.16763	µm	Spot	Position	1	DCX-	DAPI+	690
98254.2	39496.2	9.29295	µm	Spot	Position	1	DCX-	DAPI+	691
98257.6	39514.4	9.44673	µm	Spot	Position	1	DCX-	DAPI+	695
98271.1	39512.5	9.26086	µm	Spot	Position	1	DCX-	DAPI+	699
98291.9	39517.3	9.05898	µm	Spot	Position	1	DCX-	DAPI+	700
98273.7	39518.6	9.10783	µm	Spot	Position	1	DCX-	DAPI+	701
98277.1	39518.7	9.30228	µm	Spot	Position	1	DCX-	DAPI+	702
98266.7	39512.1	9.54884	µm	Spot	Position	1	DCX-	DAPI+	706
98285.8	39516.4	9.40883	µm	Spot	Position	1	DCX-	DAPI+	707
98266.6	39517.3	9.45965	µm	Spot	Position	1	DCX-	DAPI+	708
98265.3	39519	9.55555	µm	Spot	Position	1	DCX-	DAPI+	709
98301.2	39531	9.54854	µm	Spot	Position	1	DCX-	DAPI+	711
98308.8	39532.6	9.41854	µm	Spot	Position	1	DCX-	DAPI+	712
98308.1	39536.1	9.05899	µm	Spot	Position	1	DCX-	DAPI+	714
98306.8	39538.8	9.06079	µm	Spot	Position	1	DCX-	DAPI+	715
98338.7	39547	8.67846	µm	Spot	Position	1	DCX-	DAPI+	719
98332.5	39561.1	8.64126	µm	Spot	Position	1	DCX-	DAPI+	720
98319.9	39539.3	8.81493	µm	Spot	Position	1	DCX-	DAPI+	721
98346.5	39553.1	8.98584	µm	Spot	Position	1	DCX-	DAPI+	722
98343.7	39544.1	9.09943	µm	Spot	Position	1	DCX-	DAPI+	723
98350.2	39549.1	9.15321	µm	Spot	Position	1	DCX-	DAPI+	724
98343.4	39551.2	9.11719	µm	Spot	Position	1	DCX-	DAPI+	725
98323.2	39550.8	9.59876	µm	Spot	Position	1	DCX-	DAPI+	727
98350	39551.4	9.38194	µm	Spot	Position	1	DCX-	DAPI+	728
98332.8	39554.9	9.48925	µm	Spot	Position	1	DCX-	DAPI+	729
98369.3	39554.3	8.56519	µm	Spot	Position	1	DCX-	DAPI+	732
98361.3	39558	8.5587	µm	Spot	Position	1	DCX-	DAPI+	734
98378	39550.3	8.77412	µm	Spot	Position	1	DCX-	DAPI+	736
98379.2	39554.7	8.79261	µm	Spot	Position	1	DCX-	DAPI+	739
98385.4	39556.9	8.92159	µm	Spot	Position	1	DCX-	DAPI+	740
98377.8	39565.3	8.96828	µm	Spot	Position	1	DCX-	DAPI+	742
98379.3	39569.9	8.85129	µm	Spot	Position	1	DCX-	DAPI+	743
98393	39575.9	8.97634	µm	Spot	Position	1	DCX-	DAPI+	744
98370.2	39548.9	9.27152	µm	Spot	Position	1	DCX-	DAPI+	745
98388.4	39554.4	9.24576	µm	Spot	Position	1	DCX-	DAPI+	746
98386.7	39566.3	9.21101	µm	Spot	Position	1	DCX-	DAPI+	747
98370.3	39568.3	9.22139	µm	Spot	Position	1	DCX-	DAPI+	748
98363.4	39574.4	9.07944	µm	Spot	Position	1	DCX-	DAPI+	750
98356.9	39545.7	9.51666	µm	Spot	Position	1	DCX-	DAPI+	752
98358.2	39548.3	9.37023	µm	Spot	Position	1	DCX-	DAPI+	753
98390.1	39551.6	9.31589	µm	Spot	Position	1	DCX-	DAPI+	754
98371.1	39554	9.51515	µm	Spot	Position	1	DCX-	DAPI+	755
98380	39560.7	9.45334	µm	Spot	Position	1	DCX-	DAPI+	756
98402.4	39566.2	8.49908	µm	Spot	Position	1	DCX-	DAPI+	757
98432.5	39559.4	8.72602	µm	Spot	Position	1	DCX-	DAPI+	760
98422	39575.9	8.73774	µm	Spot	Position	1	DCX-	DAPI+	762
98424.9	39578.5	9.48522	µm	Spot	Position	1	DCX-	DAPI+	768
98467.3	39568.5	8.62118	µm	Spot	Position	1	DCX-	DAPI+	770
98465.3	39570.6	8.5518	µm	Spot	Position	1	DCX-	DAPI+	771
98486.7	39577.4	8.66737	µm	Spot	Position	1	DCX-	DAPI+	773
98485.8	39577.3	8.8362	µm	Spot	Position	1	DCX-	DAPI+	776
98485.4	39579.2	8.71419	µm	Spot	Position	1	DCX-	DAPI+	777
98473.7	39565.1	9.27432	µm	Spot	Position	1	DCX-	DAPI+	780
98471.4	39567.5	9.01534	µm	Spot	Position	1	DCX-	DAPI+	781
98468.6	39571.9	9.14976	µm	Spot	Position	1	DCX-	DAPI+	782
98483.8	39573.5	9.26591	µm	Spot	Position	1	DCX-	DAPI+	783
98470.9	39571.6	9.41199	µm	Spot	Position	1	DCX-	DAPI+	786
98474	39579.1	9.42917	µm	Spot	Position	1	DCX-	DAPI+	788
98509.7	39576.3	8.93915	µm	Spot	Position	1	DCX-	DAPI+	790
98520.6	39574.8	9.25277	µm	Spot	Position	1	DCX-	DAPI+	794
98443.9	39580.8	9.10524	µm	Spot	Position	1	DCX-	DAPI+	796
98431.2	39581.3	9.54823	µm	Spot	Position	1	DCX-	DAPI+	797
98446.9	39585.4	9.50424	µm	Spot	Position	1	DCX-	DAPI+	798
98458.1	39581	8.50878	µm	Spot	Position	1	DCX-	DAPI+	800
98452.5	39584.7	8.47081	µm	Spot	Position	1	DCX-	DAPI+	801
98485.6	39586	8.53686	µm	Spot	Position	1	DCX-	DAPI+	802
98481.7	39594.7	8.68901	µm	Spot	Position	1	DCX-	DAPI+	806
98492.3	39588.7	8.96726	µm	Spot	Position	1	DCX-	DAPI+	810
98484.6	39591.7	8.92817	µm	Spot	Position	1	DCX-	DAPI+	812
98475.3	39597.4	8.889	µm	Spot	Position	1	DCX-	DAPI+	813
98487.8	39593.5	9.04923	µm	Spot	Position	1	DCX-	DAPI+	818
98471.8	39598.1	9.12632	µm	Spot	Position	1	DCX-	DAPI+	819
98475.6	39595.8	9.45026	µm	Spot	Position	1	DCX-	DAPI+	824
98505.4	39593.5	8.42774	µm	Spot	Position	1	DCX-	DAPI+	825
98540.3	39596.5	8.41858	µm	Spot	Position	1	DCX-	DAPI+	827
98506.3	39592	8.9582	µm	Spot	Position	1	DCX-	DAPI+	829
98504.3	39585.4	9.231	µm	Spot	Position	1	DCX-	DAPI+	831
98521.5	39598.8	9.15	µm	Spot	Position	1	DCX-	DAPI+	835
98500.8	39585.4	9.40205	µm	Spot	Position	1	DCX-	DAPI+	837
98514.1	39586.4	9.54977	µm	Spot	Position	1	DCX-	DAPI+	838
98518	39592.8	9.54885	µm	Spot	Position	1	DCX-	DAPI+	839
98515.5	39598.3	9.4637	µm	Spot	Position	1	DCX-	DAPI+	840
98523.8	39601	9.56125	µm	Spot	Position	1	DCX-	DAPI+	841
98541	39589.8	8.78261	µm	Spot	Position	1	DCX-	DAPI+	844
98724.8	39615.2	9.0868	µm	Spot	Position	1	DCX-	DAPI+	852
98727.3	39614.8	9.35961	µm	Spot	Position	1	DCX-	DAPI+	854
97919.6	38174.4	10.7615	µm	Spot	Position	1	DCX-	DAPI+	867
97880.3	38228.3	9.82568	µm	Spot	Position	1	DCX-	DAPI+	868
97914.4	38222.2	9.94777	µm	Spot	Position	1	DCX-	DAPI+	869
97916.8	38223.5	10.711	µm	Spot	Position	1	DCX-	DAPI+	871
97911.6	38262.2	9.87356	µm	Spot	Position	1	DCX-	DAPI+	878
97917.4	38280.4	10.0298	µm	Spot	Position	1	DCX-	DAPI+	880
97912.1	38259.3	10.4625	µm	Spot	Position	1	DCX-	DAPI+	881
97938.9	38340	10.7931	µm	Spot	Position	1	DCX-	DAPI+	893
97937.8	38721	10.3292	µm	Spot	Position	1	DCX-	DAPI+	912
97945.6	38731.6	10.2277	µm	Spot	Position	1	DCX-	DAPI+	916
97941.8	38823.5	10.7536	µm	Spot	Position	1	DCX-	DAPI+	927
97946.5	38917.9	10.3837	µm	Spot	Position	1	DCX-	DAPI+	947
97940.2	38941.6	9.68294	µm	Spot	Position	1	DCX-	DAPI+	951
97936.1	38968.2	9.88657	µm	Spot	Position	1	DCX-	DAPI+	953
97947.2	38961.8	9.6876	µm	Spot	Position	1	DCX-	DAPI+	964
97942.3	38936.9	10.1563	µm	Spot	Position	1	DCX-	DAPI+	965
97937.6	39006.7	9.96948	µm	Spot	Position	1	DCX-	DAPI+	976
97928.3	39025.3	10.5156	µm	Spot	Position	1	DCX-	DAPI+	983
97923.6	39049.4	10.2731	µm	Spot	Position	1	DCX-	DAPI+	986
97923.9	39066.4	10.3731	µm	Spot	Position	1	DCX-	DAPI+	987
97927.8	39069.1	10.4947	µm	Spot	Position	1	DCX-	DAPI+	988
97939.1	39088	9.87031	µm	Spot	Position	1	DCX-	DAPI+	989
97936	39104.3	9.81173	µm	Spot	Position	1	DCX-	DAPI+	990
97922.6	39092.1	9.97479	µm	Spot	Position	1	DCX-	DAPI+	991
97934.1	39110.6	9.96569	µm	Spot	Position	1	DCX-	DAPI+	992
97919.2	39117.3	10.0272	µm	Spot	Position	1	DCX-	DAPI+	994
97920.3	39090.7	10.342	µm	Spot	Position	1	DCX-	DAPI+	995
97928.1	39118.1	10.292	µm	Spot	Position	1	DCX-	DAPI+	996
97932.1	39104.5	10.7651	µm	Spot	Position	1	DCX-	DAPI+	997
97932.2	39147.7	9.88305	µm	Spot	Position	1	DCX-	DAPI+	1018
97927.1	39156.8	9.81727	µm	Spot	Position	1	DCX-	DAPI+	1019
97926.6	39162.5	9.89453	µm	Spot	Position	1	DCX-	DAPI+	1021
97915.9	39125.3	9.98285	µm	Spot	Position	1	DCX-	DAPI+	1022
97939.7	39126.1	10.0218	µm	Spot	Position	1	DCX-	DAPI+	1023
97937.1	39139.7	10.1114	µm	Spot	Position	1	DCX-	DAPI+	1025
97936	39149.7	10.0105	µm	Spot	Position	1	DCX-	DAPI+	1026
97936.6	39158.6	9.97513	µm	Spot	Position	1	DCX-	DAPI+	1027
97934.4	39160.2	10.053	µm	Spot	Position	1	DCX-	DAPI+	1028
97925.3	39160.8	10.1267	µm	Spot	Position	1	DCX-	DAPI+	1029
97939.1	39139	10.3719	µm	Spot	Position	1	DCX-	DAPI+	1031
97921.8	39155.4	10.4257	µm	Spot	Position	1	DCX-	DAPI+	1033
97925.7	39156.1	10.2632	µm	Spot	Position	1	DCX-	DAPI+	1034
97923.4	39130.9	10.7586	µm	Spot	Position	1	DCX-	DAPI+	1038
97925.4	39150	10.8017	µm	Spot	Position	1	DCX-	DAPI+	1040
97947.2	39145	10.6839	µm	Spot	Position	1	DCX-	DAPI+	1043
97928.8	39176.3	9.80083	µm	Spot	Position	1	DCX-	DAPI+	1079
97925.3	39181.1	9.82662	µm	Spot	Position	1	DCX-	DAPI+	1080
97933.5	39190.2	9.61871	µm	Spot	Position	1	DCX-	DAPI+	1083
97927.1	39202.8	9.79438	µm	Spot	Position	1	DCX-	DAPI+	1084
97936.2	39205.9	9.76212	µm	Spot	Position	1	DCX-	DAPI+	1085
97937.9	39206.7	9.68221	µm	Spot	Position	1	DCX-	DAPI+	1086
97919	39166.4	10.0779	µm	Spot	Position	1	DCX-	DAPI+	1087
97919.9	39174.8	10.1293	µm	Spot	Position	1	DCX-	DAPI+	1089
97923.2	39177.9	9.98679	µm	Spot	Position	1	DCX-	DAPI+	1090
97927.1	39182.4	9.91166	µm	Spot	Position	1	DCX-	DAPI+	1091
97934.6	39195.3	10.0514	µm	Spot	Position	1	DCX-	DAPI+	1093
97931.6	39205.5	10.0064	µm	Spot	Position	1	DCX-	DAPI+	1095
97927.5	39167.3	10.4731	µm	Spot	Position	1	DCX-	DAPI+	1099
97925.8	39189.6	10.3767	µm	Spot	Position	1	DCX-	DAPI+	1103
97931.3	39197.6	10.2815	µm	Spot	Position	1	DCX-	DAPI+	1104
97928	39198.1	10.435	µm	Spot	Position	1	DCX-	DAPI+	1105
97926.1	39169.1	10.5354	µm	Spot	Position	1	DCX-	DAPI+	1108
97930.6	39183.7	10.7379	µm	Spot	Position	1	DCX-	DAPI+	1110
97934	39194.2	10.7317	µm	Spot	Position	1	DCX-	DAPI+	1111
97922.6	39200.5	10.651	µm	Spot	Position	1	DCX-	DAPI+	1113
97966.6	39182.7	9.78744	µm	Spot	Position	1	DCX-	DAPI+	1114
97961.8	39184.9	9.67224	µm	Spot	Position	1	DCX-	DAPI+	1116
97967.3	39200.1	10.0239	µm	Spot	Position	1	DCX-	DAPI+	1119
97964.5	39205.7	9.94138	µm	Spot	Position	1	DCX-	DAPI+	1120
97965.5	39174.9	10.2289	µm	Spot	Position	1	DCX-	DAPI+	1122
97954.6	39184.5	10.4599	µm	Spot	Position	1	DCX-	DAPI+	1124
97966.7	39191.6	10.5054	µm	Spot	Position	1	DCX-	DAPI+	1126
97952.5	39167.5	10.6104	µm	Spot	Position	1	DCX-	DAPI+	1128
97965.2	39194.8	10.7273	µm	Spot	Position	1	DCX-	DAPI+	1133
97964.8	39197.7	10.5508	µm	Spot	Position	1	DCX-	DAPI+	1134
97973.5	39206.7	10.579	µm	Spot	Position	1	DCX-	DAPI+	1135
97977	39210.1	10.6475	µm	Spot	Position	1	DCX-	DAPI+	1136
97939.8	39219.8	9.80201	µm	Spot	Position	1	DCX-	DAPI+	1154
97936.5	39224.1	9.8018	µm	Spot	Position	1	DCX-	DAPI+	1156
97938.4	39227.1	9.64414	µm	Spot	Position	1	DCX-	DAPI+	1158
97936.8	39211.1	10.1524	µm	Spot	Position	1	DCX-	DAPI+	1162
97940	39212.3	10.1609	µm	Spot	Position	1	DCX-	DAPI+	1164
97929.9	39214.4	10.0682	µm	Spot	Position	1	DCX-	DAPI+	1166
97926.1	39220.1	10.1621	µm	Spot	Position	1	DCX-	DAPI+	1168
97934.8	39220.5	10.0227	µm	Spot	Position	1	DCX-	DAPI+	1169
97937.5	39227.9	9.91733	µm	Spot	Position	1	DCX-	DAPI+	1171
97921.8	39211.5	10.305	µm	Spot	Position	1	DCX-	DAPI+	1174
97932.7	39226.4	10.2952	µm	Spot	Position	1	DCX-	DAPI+	1180
97928.5	39212.9	10.6876	µm	Spot	Position	1	DCX-	DAPI+	1183
97934.1	39224.9	10.5075	µm	Spot	Position	1	DCX-	DAPI+	1186
97941	39211	9.8224	µm	Spot	Position	1	DCX-	DAPI+	1189
97944	39216.4	9.62819	µm	Spot	Position	1	DCX-	DAPI+	1190
97968.1	39222.5	9.89386	µm	Spot	Position	1	DCX-	DAPI+	1191
97980.4	39222.6	9.71256	µm	Spot	Position	1	DCX-	DAPI+	1192
97970.2	39228.3	9.74999	µm	Spot	Position	1	DCX-	DAPI+	1194
97956.2	39240.7	9.81771	µm	Spot	Position	1	DCX-	DAPI+	1196
97983.5	39241.1	9.77336	µm	Spot	Position	1	DCX-	DAPI+	1197
97963.6	39215	9.92289	µm	Spot	Position	1	DCX-	DAPI+	1198
97979.1	39215.3	10.1406	µm	Spot	Position	1	DCX-	DAPI+	1199
97966.4	39226.3	9.90679	µm	Spot	Position	1	DCX-	DAPI+	1201
97971.8	39226.1	9.99332	µm	Spot	Position	1	DCX-	DAPI+	1202
97944.6	39228.9	10.0601	µm	Spot	Position	1	DCX-	DAPI+	1203
97963.1	39251.4	9.9454	µm	Spot	Position	1	DCX-	DAPI+	1206
97952.9	39252.9	10.0645	µm	Spot	Position	1	DCX-	DAPI+	1207
97960	39253.6	10.1564	µm	Spot	Position	1	DCX-	DAPI+	1208
97968.5	39213.2	10.2137	µm	Spot	Position	1	DCX-	DAPI+	1210
97978.6	39220.1	10.379	µm	Spot	Position	1	DCX-	DAPI+	1211
97943.4	39225.4	10.4905	µm	Spot	Position	1	DCX-	DAPI+	1213
97973	39232.1	10.3451	µm	Spot	Position	1	DCX-	DAPI+	1214
97981.3	39237.8	10.2537	µm	Spot	Position	1	DCX-	DAPI+	1215
97949.5	39251.6	10.3947	µm	Spot	Position	1	DCX-	DAPI+	1219
97941.6	39212.7	10.7319	µm	Spot	Position	1	DCX-	DAPI+	1220
97974.8	39214.8	10.5784	µm	Spot	Position	1	DCX-	DAPI+	1221
97981.6	39227.7	10.5802	µm	Spot	Position	1	DCX-	DAPI+	1222
97968.5	39227.9	10.6607	µm	Spot	Position	1	DCX-	DAPI+	1223
97986.1	39231.6	10.5229	µm	Spot	Position	1	DCX-	DAPI+	1224
97976.5	39235.7	10.7032	µm	Spot	Position	1	DCX-	DAPI+	1225
97961.7	39250.8	10.5408	µm	Spot	Position	1	DCX-	DAPI+	1226
97988.4	39248.8	10.2502	µm	Spot	Position	1	DCX-	DAPI+	1227
97988.4	39246.1	10.7853	µm	Spot	Position	1	DCX-	DAPI+	1228
97926.1	39272	9.84032	µm	Spot	Position	1	DCX-	DAPI+	1234
97928.4	39267.5	10.3214	µm	Spot	Position	1	DCX-	DAPI+	1240
97927.9	39284.5	10.4323	µm	Spot	Position	1	DCX-	DAPI+	1242
97971	39258.7	9.63681	µm	Spot	Position	1	DCX-	DAPI+	1244
97980.3	39259.5	9.6823	µm	Spot	Position	1	DCX-	DAPI+	1245
97974.1	39263	9.70844	µm	Spot	Position	1	DCX-	DAPI+	1247
97983.1	39273.2	9.81356	µm	Spot	Position	1	DCX-	DAPI+	1249
97984.1	39284	9.62951	µm	Spot	Position	1	DCX-	DAPI+	1251
97966.5	39289.5	9.72637	µm	Spot	Position	1	DCX-	DAPI+	1253
97984.9	39294.6	9.7437	µm	Spot	Position	1	DCX-	DAPI+	1254
97970.7	39298.5	9.99433	µm	Spot	Position	1	DCX-	DAPI+	1258
97974.1	39301.7	10.0726	µm	Spot	Position	1	DCX-	DAPI+	1259
97978.4	39258.8	10.2165	µm	Spot	Position	1	DCX-	DAPI+	1260
97981.6	39267.8	10.2774	µm	Spot	Position	1	DCX-	DAPI+	1261
97978.8	39272.7	10.2989	µm	Spot	Position	1	DCX-	DAPI+	1262
97984.1	39280.6	10.2123	µm	Spot	Position	1	DCX-	DAPI+	1263
97971.2	39301.6	10.4294	µm	Spot	Position	1	DCX-	DAPI+	1265
97959.1	39263.1	10.664	µm	Spot	Position	1	DCX-	DAPI+	1266
97983.5	39278.7	10.8003	µm	Spot	Position	1	DCX-	DAPI+	1269
97969.2	39282.5	10.7785	µm	Spot	Position	1	DCX-	DAPI+	1270
97981.7	39284.6	10.5634	µm	Spot	Position	1	DCX-	DAPI+	1271
98001.1	39277	9.86746	µm	Spot	Position	1	DCX-	DAPI+	1273
97990.1	39277.5	9.79559	µm	Spot	Position	1	DCX-	DAPI+	1274
97996.4	39293.7	9.80826	µm	Spot	Position	1	DCX-	DAPI+	1276
97994.6	39298.8	9.81106	µm	Spot	Position	1	DCX-	DAPI+	1277
98002.2	39300.4	9.61117	µm	Spot	Position	1	DCX-	DAPI+	1279
97989	39261.6	10.1326	µm	Spot	Position	1	DCX-	DAPI+	1280
97995.7	39286.2	10.0913	µm	Spot	Position	1	DCX-	DAPI+	1281
98001.3	39288.4	10.0233	µm	Spot	Position	1	DCX-	DAPI+	1282
98003.9	39296.8	9.9546	µm	Spot	Position	1	DCX-	DAPI+	1284
97991.4	39258.8	10.2356	µm	Spot	Position	1	DCX-	DAPI+	1287
98001.7	39296.1	10.4044	µm	Spot	Position	1	DCX-	DAPI+	1290
97992.3	39288.1	10.612	µm	Spot	Position	1	DCX-	DAPI+	1292
97991.3	39302.4	10.5634	µm	Spot	Position	1	DCX-	DAPI+	1294
98028.2	39309.6	9.70603	µm	Spot	Position	1	DCX-	DAPI+	1299
98004.5	39328.9	9.68832	µm	Spot	Position	1	DCX-	DAPI+	1304
98005.6	39329.2	10.0994	µm	Spot	Position	1	DCX-	DAPI+	1306
97991.3	39322.3	10.4219	µm	Spot	Position	1	DCX-	DAPI+	1311
98011.6	39339.1	10.4668	µm	Spot	Position	1	DCX-	DAPI+	1313
98023.2	39345.4	10.486	µm	Spot	Position	1	DCX-	DAPI+	1314
98022	39317.6	10.7561	µm	Spot	Position	1	DCX-	DAPI+	1316
98015.4	39322.7	10.6673	µm	Spot	Position	1	DCX-	DAPI+	1317
98013.4	39334.5	10.8001	µm	Spot	Position	1	DCX-	DAPI+	1318
98010.8	39342.2	10.5861	µm	Spot	Position	1	DCX-	DAPI+	1319
98047.2	39327	9.61992	µm	Spot	Position	1	DCX-	DAPI+	1320
98045.2	39327.1	10.5368	µm	Spot	Position	1	DCX-	DAPI+	1328
98032.9	39348.4	10.7156	µm	Spot	Position	1	DCX-	DAPI+	1331
98033.7	39349.7	9.64595	µm	Spot	Position	1	DCX-	DAPI+	1339
98057.3	39357.9	10.0957	µm	Spot	Position	1	DCX-	DAPI+	1340
98073.3	39377.1	10.0094	µm	Spot	Position	1	DCX-	DAPI+	1342
98043.6	39363.6	10.3883	µm	Spot	Position	1	DCX-	DAPI+	1345
98051.8	39367.1	10.3924	µm	Spot	Position	1	DCX-	DAPI+	1347
98077.1	39370	10.4152	µm	Spot	Position	1	DCX-	DAPI+	1348
98067.5	39363.1	10.6208	µm	Spot	Position	1	DCX-	DAPI+	1349
98096.3	39390.5	9.78588	µm	Spot	Position	1	DCX-	DAPI+	1350
98085.3	39392.1	9.9149	µm	Spot	Position	1	DCX-	DAPI+	1351
98094.8	39386.7	10.242	µm	Spot	Position	1	DCX-	DAPI+	1353
98087.8	39390.1	10.6447	µm	Spot	Position	1	DCX-	DAPI+	1358
98094.8	39390.8	10.6595	µm	Spot	Position	1	DCX-	DAPI+	1359
98091.9	39393.3	10.6611	µm	Spot	Position	1	DCX-	DAPI+	1360
98104.8	39399.6	9.64721	µm	Spot	Position	1	DCX-	DAPI+	1375
98116	39400.8	9.878	µm	Spot	Position	1	DCX-	DAPI+	1376
98116.4	39401.8	9.90646	µm	Spot	Position	1	DCX-	DAPI+	1377
98113.2	39405.9	9.64144	µm	Spot	Position	1	DCX-	DAPI+	1378
98112.1	39414.1	9.79333	µm	Spot	Position	1	DCX-	DAPI+	1379
98107.1	39418.4	9.83527	µm	Spot	Position	1	DCX-	DAPI+	1380
98083.7	39397.6	10.0392	µm	Spot	Position	1	DCX-	DAPI+	1381
98105.6	39398.1	10.0932	µm	Spot	Position	1	DCX-	DAPI+	1382
98112.3	39402.6	10.0625	µm	Spot	Position	1	DCX-	DAPI+	1385
98108	39404.8	9.98103	µm	Spot	Position	1	DCX-	DAPI+	1386
98123.3	39414.4	10.4799	µm	Spot	Position	1	DCX-	DAPI+	1388
98121.2	39419.7	10.4816	µm	Spot	Position	1	DCX-	DAPI+	1389
98105.4	39396.7	10.7703	µm	Spot	Position	1	DCX-	DAPI+	1390
98102.3	39398.9	10.6977	µm	Spot	Position	1	DCX-	DAPI+	1391
98114.6	39398.9	10.7497	µm	Spot	Position	1	DCX-	DAPI+	1392
98100.8	39404.6	10.7827	µm	Spot	Position	1	DCX-	DAPI+	1393
98106.2	39411.6	10.8038	µm	Spot	Position	1	DCX-	DAPI+	1395
98114.2	39418.6	10.6427	µm	Spot	Position	1	DCX-	DAPI+	1397
98140	39414.3	9.85528	µm	Spot	Position	1	DCX-	DAPI+	1398
98132.9	39423.5	9.81067	µm	Spot	Position	1	DCX-	DAPI+	1399
98153.8	39425.3	9.7839	µm	Spot	Position	1	DCX-	DAPI+	1400
98133.8	39414.9	10.0213	µm	Spot	Position	1	DCX-	DAPI+	1402
98134.8	39417.2	10.0189	µm	Spot	Position	1	DCX-	DAPI+	1403
98158.7	39425.2	10.0033	µm	Spot	Position	1	DCX-	DAPI+	1406
98166	39440.6	10.0495	µm	Spot	Position	1	DCX-	DAPI+	1409
98137.6	39420.8	10.277	µm	Spot	Position	1	DCX-	DAPI+	1411
98164.6	39434.8	10.4041	µm	Spot	Position	1	DCX-	DAPI+	1412
98144.6	39436.1	10.3151	µm	Spot	Position	1	DCX-	DAPI+	1413
98143	39438.9	10.4676	µm	Spot	Position	1	DCX-	DAPI+	1414
98129.4	39408.6	10.6197	µm	Spot	Position	1	DCX-	DAPI+	1415
98147.3	39425.3	10.6975	µm	Spot	Position	1	DCX-	DAPI+	1416
98177.1	39437.2	9.73391	µm	Spot	Position	1	DCX-	DAPI+	1419
98169.9	39446.5	9.69892	µm	Spot	Position	1	DCX-	DAPI+	1421
98170.9	39453.6	9.87018	µm	Spot	Position	1	DCX-	DAPI+	1422
98169.1	39447.8	10.3809	µm	Spot	Position	1	DCX-	DAPI+	1424
98178.7	39446.5	9.75086	µm	Spot	Position	1	DCX-	DAPI+	1427
98177.2	39448.7	9.62235	µm	Spot	Position	1	DCX-	DAPI+	1428
98196.3	39463.8	9.6068	µm	Spot	Position	1	DCX-	DAPI+	1433
98195.7	39468.4	9.82348	µm	Spot	Position	1	DCX-	DAPI+	1434
98180.5	39448	10.0082	µm	Spot	Position	1	DCX-	DAPI+	1436
98196.1	39461.6	10.1084	µm	Spot	Position	1	DCX-	DAPI+	1438
98206.3	39474.4	10.1965	µm	Spot	Position	1	DCX-	DAPI+	1440
98181.8	39453.2	10.6189	µm	Spot	Position	1	DCX-	DAPI+	1443
98196.7	39454.7	10.7713	µm	Spot	Position	1	DCX-	DAPI+	1445
98201.3	39454.7	10.5723	µm	Spot	Position	1	DCX-	DAPI+	1446
98194	39456.4	10.6001	µm	Spot	Position	1	DCX-	DAPI+	1447
98199.6	39469.1	10.524	µm	Spot	Position	1	DCX-	DAPI+	1448
98206.2	39473.4	10.5815	µm	Spot	Position	1	DCX-	DAPI+	1449
98225.4	39478.5	10.1494	µm	Spot	Position	1	DCX-	DAPI+	1451
98222.8	39482	10.1886	µm	Spot	Position	1	DCX-	DAPI+	1452
98220	39473.3	10.2582	µm	Spot	Position	1	DCX-	DAPI+	1454
98225	39484.2	10.4189	µm	Spot	Position	1	DCX-	DAPI+	1455
98222.1	39472.9	10.7968	µm	Spot	Position	1	DCX-	DAPI+	1456
98235.7	39492.2	9.79504	µm	Spot	Position	1	DCX-	DAPI+	1461
98249.3	39494.9	10.4919	µm	Spot	Position	1	DCX-	DAPI+	1466
98253.3	39503.4	10.4155	µm	Spot	Position	1	DCX-	DAPI+	1468
98258.6	39517.4	10.4256	µm	Spot	Position	1	DCX-	DAPI+	1469
98260.5	39519.3	10.2647	µm	Spot	Position	1	DCX-	DAPI+	1470
98232.7	39488.4	10.7071	µm	Spot	Position	1	DCX-	DAPI+	1473
98235.9	39490.1	10.5686	µm	Spot	Position	1	DCX-	DAPI+	1474
98261.4	39508.1	10.5509	µm	Spot	Position	1	DCX-	DAPI+	1476
98263.5	39517.7	10.5515	µm	Spot	Position	1	DCX-	DAPI+	1477
98270.4	39505.6	9.75814	µm	Spot	Position	1	DCX-	DAPI+	1481
98276	39513.1	9.86981	µm	Spot	Position	1	DCX-	DAPI+	1483
98276.6	39517.8	9.83905	µm	Spot	Position	1	DCX-	DAPI+	1484
98275.6	39509.3	9.96003	µm	Spot	Position	1	DCX-	DAPI+	1490
98275.4	39515	9.99958	µm	Spot	Position	1	DCX-	DAPI+	1491
98296.1	39522.3	9.97362	µm	Spot	Position	1	DCX-	DAPI+	1492
98269.6	39509.3	10.3104	µm	Spot	Position	1	DCX-	DAPI+	1493
98297.9	39520	10.2334	µm	Spot	Position	1	DCX-	DAPI+	1494
98292	39523.3	10.4706	µm	Spot	Position	1	DCX-	DAPI+	1495
98289.7	39527.3	10.4611	µm	Spot	Position	1	DCX-	DAPI+	1496
98280.4	39507.4	10.5166	µm	Spot	Position	1	DCX-	DAPI+	1498
98288.3	39517.6	10.7598	µm	Spot	Position	1	DCX-	DAPI+	1500
98314.2	39529.1	10.22	µm	Spot	Position	1	DCX-	DAPI+	1509
98323.5	39533	10.7936	µm	Spot	Position	1	DCX-	DAPI+	1511
98298.9	39535.6	10.0022	µm	Spot	Position	1	DCX-	DAPI+	1516
98346.9	39555.5	9.79461	µm	Spot	Position	1	DCX-	DAPI+	1523
98319	39556.7	9.66931	µm	Spot	Position	1	DCX-	DAPI+	1524
98323.8	39541.2	10.5845	µm	Spot	Position	1	DCX-	DAPI+	1530
98327.9	39551	10.5596	µm	Spot	Position	1	DCX-	DAPI+	1532
98331.5	39557.7	10.5267	µm	Spot	Position	1	DCX-	DAPI+	1533
98358.6	39546.4	9.86004	µm	Spot	Position	1	DCX-	DAPI+	1534
98380.4	39556.7	9.63019	µm	Spot	Position	1	DCX-	DAPI+	1535
98371.1	39566.2	9.64742	µm	Spot	Position	1	DCX-	DAPI+	1536
98381.7	39567.5	9.75473	µm	Spot	Position	1	DCX-	DAPI+	1537
98359.1	39570.3	9.82109	µm	Spot	Position	1	DCX-	DAPI+	1538
98367.3	39571.6	9.82296	µm	Spot	Position	1	DCX-	DAPI+	1539
98380	39577.2	9.83616	µm	Spot	Position	1	DCX-	DAPI+	1541
98384	39578.9	9.62946	µm	Spot	Position	1	DCX-	DAPI+	1542
98386.3	39549.2	10.0885	µm	Spot	Position	1	DCX-	DAPI+	1545
98382.8	39550.7	9.9466	µm	Spot	Position	1	DCX-	DAPI+	1546
98385.6	39552.2	10.0346	µm	Spot	Position	1	DCX-	DAPI+	1547
98388.4	39568.1	10.0473	µm	Spot	Position	1	DCX-	DAPI+	1548
98397.6	39573.6	9.91958	µm	Spot	Position	1	DCX-	DAPI+	1549
98381.9	39573.6	10.4181	µm	Spot	Position	1	DCX-	DAPI+	1550
98378.4	39579.4	10.4341	µm	Spot	Position	1	DCX-	DAPI+	1551
98374.1	39556.7	10.7521	µm	Spot	Position	1	DCX-	DAPI+	1553
98388	39560.4	10.6472	µm	Spot	Position	1	DCX-	DAPI+	1554
98396.8	39564.8	10.5715	µm	Spot	Position	1	DCX-	DAPI+	1555
98428.7	39556.7	10.0526	µm	Spot	Position	1	DCX-	DAPI+	1558
98421.7	39573.5	9.93898	µm	Spot	Position	1	DCX-	DAPI+	1560
98432	39575.7	10.0566	µm	Spot	Position	1	DCX-	DAPI+	1562
98430.2	39575.9	10.0673	µm	Spot	Position	1	DCX-	DAPI+	1563
98408.1	39549.2	10.3038	µm	Spot	Position	1	DCX-	DAPI+	1564
98448.3	39563.8	10.2479	µm	Spot	Position	1	DCX-	DAPI+	1565
98424.1	39579.2	10.6397	µm	Spot	Position	1	DCX-	DAPI+	1569
98465.2	39565.2	9.72229	µm	Spot	Position	1	DCX-	DAPI+	1570
98462.4	39566	9.88224	µm	Spot	Position	1	DCX-	DAPI+	1571
98471.9	39568.5	9.7606	µm	Spot	Position	1	DCX-	DAPI+	1572
98489.5	39572.1	9.85124	µm	Spot	Position	1	DCX-	DAPI+	1573
98492.1	39576.7	9.86372	µm	Spot	Position	1	DCX-	DAPI+	1575
98467.3	39563.8	10.0209	µm	Spot	Position	1	DCX-	DAPI+	1576
98458.8	39567.9	10.1881	µm	Spot	Position	1	DCX-	DAPI+	1578
98464.1	39575.5	10.1441	µm	Spot	Position	1	DCX-	DAPI+	1579
98450.1	39564.8	10.2831	µm	Spot	Position	1	DCX-	DAPI+	1583
98489	39575.4	10.3859	µm	Spot	Position	1	DCX-	DAPI+	1584
98489	39564.9	10.5272	µm	Spot	Position	1	DCX-	DAPI+	1588
98513.1	39569.9	9.62583	µm	Spot	Position	1	DCX-	DAPI+	1590
98521.9	39571.3	9.99326	µm	Spot	Position	1	DCX-	DAPI+	1594
98509.6	39574.4	10.1047	µm	Spot	Position	1	DCX-	DAPI+	1596
98525.4	39569.6	10.2656	µm	Spot	Position	1	DCX-	DAPI+	1599
98528.4	39572.5	10.4433	µm	Spot	Position	1	DCX-	DAPI+	1600
98503.6	39574.7	10.7953	µm	Spot	Position	1	DCX-	DAPI+	1603
98546	39578.5	10.6929	µm	Spot	Position	1	DCX-	DAPI+	1606
98448	39580.5	9.70732	µm	Spot	Position	1	DCX-	DAPI+	1627
98444.3	39583.7	9.8392	µm	Spot	Position	1	DCX-	DAPI+	1628
98479.7	39591.8	9.63588	µm	Spot	Position	1	DCX-	DAPI+	1637
98485.9	39581.1	10.1156	µm	Spot	Position	1	DCX-	DAPI+	1638
98455.6	39585.1	10.0536	µm	Spot	Position	1	DCX-	DAPI+	1639
98458.3	39586.6	10.0594	µm	Spot	Position	1	DCX-	DAPI+	1640
98452.7	39582.8	10.3913	µm	Spot	Position	1	DCX-	DAPI+	1643
98492.6	39590.1	10.2905	µm	Spot	Position	1	DCX-	DAPI+	1645
98487.7	39595	10.2599	µm	Spot	Position	1	DCX-	DAPI+	1646
98491.1	39595.5	10.2356	µm	Spot	Position	1	DCX-	DAPI+	1647
98478.2	39592.2	10.6965	µm	Spot	Position	1	DCX-	DAPI+	1648
98501.1	39586.7	9.77156	µm	Spot	Position	1	DCX-	DAPI+	1649
98532.8	39596.5	9.87982	µm	Spot	Position	1	DCX-	DAPI+	1650
98528.4	39598	9.88003	µm	Spot	Position	1	DCX-	DAPI+	1651
98537.3	39598.7	9.83242	µm	Spot	Position	1	DCX-	DAPI+	1652
98503.1	39590.7	10.0074	µm	Spot	Position	1	DCX-	DAPI+	1654
98504.8	39590.7	10.1676	µm	Spot	Position	1	DCX-	DAPI+	1655
98508	39593	9.95239	µm	Spot	Position	1	DCX-	DAPI+	1656
98515.8	39596.4	10.1813	µm	Spot	Position	1	DCX-	DAPI+	1657
98510.2	39599.4	9.9606	µm	Spot	Position	1	DCX-	DAPI+	1658
98524.8	39599.2	10.7721	µm	Spot	Position	1	DCX-	DAPI+	1661
98543	39583.4	9.61417	µm	Spot	Position	1	DCX-	DAPI+	1662
98544.8	39587.4	9.63871	µm	Spot	Position	1	DCX-	DAPI+	1663
98543.2	39581.6	9.98454	µm	Spot	Position	1	DCX-	DAPI+	1671
98545.6	39591.1	10.0781	µm	Spot	Position	1	DCX-	DAPI+	1672
98546.4	39592.4	10.3566	µm	Spot	Position	1	DCX-	DAPI+	1678
98547.6	39597.3	10.4605	µm	Spot	Position	1	DCX-	DAPI+	1680
98547.1	39584.6	10.7652	µm	Spot	Position	1	DCX-	DAPI+	1684
98545.7	39585.5	10.5554	µm	Spot	Position	1	DCX-	DAPI+	1685
98645.5	39610.4	10.107	µm	Spot	Position	1	DCX-	DAPI+	1698
98645.3	39609.4	10.6389	µm	Spot	Position	1	DCX-	DAPI+	1701
98707	39616.7	10.1104	µm	Spot	Position	1	DCX-	DAPI+	1706
98698.2	39613.8	10.6427	µm	Spot	Position	1	DCX-	DAPI+	1712
97911.7	38186.4	10.9084	µm	Spot	Position	1	DCX-	DAPI+	1737
97912.5	38182.3	11.8746	µm	Spot	Position	1	DCX-	DAPI+	1738
97915.6	38194.3	11.8196	µm	Spot	Position	1	DCX-	DAPI+	1739
97898.5	38240.2	11.0482	µm	Spot	Position	1	DCX-	DAPI+	1742
97925.6	38229.9	11.3273	µm	Spot	Position	1	DCX-	DAPI+	1743
97948	38240.3	11.4528	µm	Spot	Position	1	DCX-	DAPI+	1744
97916	38258.4	10.8171	µm	Spot	Position	1	DCX-	DAPI+	1753
97924.1	38282.9	11.191	µm	Spot	Position	1	DCX-	DAPI+	1754
97926.3	38284.3	11.641	µm	Spot	Position	1	DCX-	DAPI+	1755
97921.1	38284.5	11.4884	µm	Spot	Position	1	DCX-	DAPI+	1756
97920.8	38295.7	11.583	µm	Spot	Position	1	DCX-	DAPI+	1762
97954.1	38512	11.9452	µm	Spot	Position	1	DCX-	DAPI+	1801
97951	38581.5	11.8704	µm	Spot	Position	1	DCX-	DAPI+	1812
97956.8	38584.9	11.9854	µm	Spot	Position	1	DCX-	DAPI+	1813
97965.8	38588.5	11.9405	µm	Spot	Position	1	DCX-	DAPI+	1814
97952	38757.2	10.8522	µm	Spot	Position	1	DCX-	DAPI+	1849
97940.5	38820.1	11.3584	µm	Spot	Position	1	DCX-	DAPI+	1863
97944.2	38836.6	11.6895	µm	Spot	Position	1	DCX-	DAPI+	1865
97945.5	38808.3	11.912	µm	Spot	Position	1	DCX-	DAPI+	1867
97940.5	38845.5	11.2788	µm	Spot	Position	1	DCX-	DAPI+	1882
97941.1	38884.1	11.0786	µm	Spot	Position	1	DCX-	DAPI+	1892
97947.2	38872.2	11.663	µm	Spot	Position	1	DCX-	DAPI+	1895
97947.3	38879.2	11.8837	µm	Spot	Position	1	DCX-	DAPI+	1896
97933	38932.5	10.8785	µm	Spot	Position	1	DCX-	DAPI+	1906
97935	38925.3	11.4494	µm	Spot	Position	1	DCX-	DAPI+	1917
97948.6	38922	11.1043	µm	Spot	Position	1	DCX-	DAPI+	1920
97944.4	38921.5	11.3321	µm	Spot	Position	1	DCX-	DAPI+	1921
97943	38889.9	11.5512	µm	Spot	Position	1	DCX-	DAPI+	1922
97935.3	38955.7	10.9124	µm	Spot	Position	1	DCX-	DAPI+	1934
97938.9	38934.9	11.1659	µm	Spot	Position	1	DCX-	DAPI+	1936
97937.7	38949.4	11.2797	µm	Spot	Position	1	DCX-	DAPI+	1939
97935.4	38951.6	11.8635	µm	Spot	Position	1	DCX-	DAPI+	1943
97932.2	38980.3	10.9686	µm	Spot	Position	1	DCX-	DAPI+	1966
97930.3	38998	10.8438	µm	Spot	Position	1	DCX-	DAPI+	1967
97926.4	39006.8	10.995	µm	Spot	Position	1	DCX-	DAPI+	1968
97935.4	39015.3	11.4886	µm	Spot	Position	1	DCX-	DAPI+	1976
97934.9	39023.5	11.5244	µm	Spot	Position	1	DCX-	DAPI+	1977
97943.6	39013	11.1985	µm	Spot	Position	1	DCX-	DAPI+	1980
97945.4	39017.8	11.8477	µm	Spot	Position	1	DCX-	DAPI+	1981
97937.7	39065.9	10.9763	µm	Spot	Position	1	DCX-	DAPI+	1991
97925.7	39043.7	11.1597	µm	Spot	Position	1	DCX-	DAPI+	1994
97922.7	39058.3	11.599	µm	Spot	Position	1	DCX-	DAPI+	1999
97928.6	39055.8	11.7285	µm	Spot	Position	1	DCX-	DAPI+	2002
97923.6	39065.5	11.9365	µm	Spot	Position	1	DCX-	DAPI+	2003
97927.3	39077.4	10.9542	µm	Spot	Position	1	DCX-	DAPI+	2017
97926.1	39081.6	10.8246	µm	Spot	Position	1	DCX-	DAPI+	2018
97933.7	39103.8	10.9035	µm	Spot	Position	1	DCX-	DAPI+	2019
97925.4	39092.4	11.3511	µm	Spot	Position	1	DCX-	DAPI+	2021
97921.4	39102.3	11.1242	µm	Spot	Position	1	DCX-	DAPI+	2022
97928.5	39083.8	11.6868	µm	Spot	Position	1	DCX-	DAPI+	2023
97921.1	39098.9	11.5059	µm	Spot	Position	1	DCX-	DAPI+	2026
97939.9	39106	11.4806	µm	Spot	Position	1	DCX-	DAPI+	2028
97917.2	39078.8	11.8617	µm	Spot	Position	1	DCX-	DAPI+	2029
97945.5	39108.5	11.717	µm	Spot	Position	1	DCX-	DAPI+	2033
97936.1	39148.6	10.9992	µm	Spot	Position	1	DCX-	DAPI+	2076
97914.2	39149.3	10.9049	µm	Spot	Position	1	DCX-	DAPI+	2077
97922.7	39152.8	10.8542	µm	Spot	Position	1	DCX-	DAPI+	2078
97925.9	39118.9	11.3325	µm	Spot	Position	1	DCX-	DAPI+	2079
97932.1	39122.5	11.1463	µm	Spot	Position	1	DCX-	DAPI+	2081
97920.9	39139.9	11.4008	µm	Spot	Position	1	DCX-	DAPI+	2082
97929.7	39144.9	11.1385	µm	Spot	Position	1	DCX-	DAPI+	2083
97917.6	39145	11.2909	µm	Spot	Position	1	DCX-	DAPI+	2084
97913.4	39150.1	11.2493	µm	Spot	Position	1	DCX-	DAPI+	2085
97921.4	39129.7	11.6991	µm	Spot	Position	1	DCX-	DAPI+	2088
97921.1	39145.3	11.6576	µm	Spot	Position	1	DCX-	DAPI+	2091
97923.4	39148.5	11.4275	µm	Spot	Position	1	DCX-	DAPI+	2092
97931.1	39154.5	11.5649	µm	Spot	Position	1	DCX-	DAPI+	2094
97939	39160.2	11.4734	µm	Spot	Position	1	DCX-	DAPI+	2096
97936.6	39119.5	11.9942	µm	Spot	Position	1	DCX-	DAPI+	2097
97919.5	39126.6	11.9641	µm	Spot	Position	1	DCX-	DAPI+	2098
97915.9	39129.2	11.9365	µm	Spot	Position	1	DCX-	DAPI+	2099
97937.1	39149	11.9043	µm	Spot	Position	1	DCX-	DAPI+	2102
97937.7	39152.7	11.95	µm	Spot	Position	1	DCX-	DAPI+	2103
97927.2	39164.7	11.9185	µm	Spot	Position	1	DCX-	DAPI+	2104
97950.1	39154.3	10.95	µm	Spot	Position	1	DCX-	DAPI+	2106
97950.5	39157.1	10.8325	µm	Spot	Position	1	DCX-	DAPI+	2107
97955.1	39158.1	10.9321	µm	Spot	Position	1	DCX-	DAPI+	2108
97942.3	39129	11.2297	µm	Spot	Position	1	DCX-	DAPI+	2109
97941.1	39133.8	11.6421	µm	Spot	Position	1	DCX-	DAPI+	2111
97941	39139.7	11.5499	µm	Spot	Position	1	DCX-	DAPI+	2112
97944	39127.8	11.7594	µm	Spot	Position	1	DCX-	DAPI+	2114
97940.5	39132.1	11.9496	µm	Spot	Position	1	DCX-	DAPI+	2115
97951.5	39144	11.9603	µm	Spot	Position	1	DCX-	DAPI+	2118
97926.6	39167.4	10.9624	µm	Spot	Position	1	DCX-	DAPI+	2182
97927	39175.8	10.8309	µm	Spot	Position	1	DCX-	DAPI+	2186
97932.1	39179.5	11.0261	µm	Spot	Position	1	DCX-	DAPI+	2187
97922.9	39184.2	11.054	µm	Spot	Position	1	DCX-	DAPI+	2190
97923.9	39198.2	10.9928	µm	Spot	Position	1	DCX-	DAPI+	2192
97921	39188.3	11.3292	µm	Spot	Position	1	DCX-	DAPI+	2196
97925	39190.1	11.2761	µm	Spot	Position	1	DCX-	DAPI+	2197
97926.1	39196.6	11.6327	µm	Spot	Position	1	DCX-	DAPI+	2201
97920.6	39177.6	11.8846	µm	Spot	Position	1	DCX-	DAPI+	2204
97964.9	39189.4	11.1071	µm	Spot	Position	1	DCX-	DAPI+	2209
97958.4	39166.3	11.3071	µm	Spot	Position	1	DCX-	DAPI+	2210
97958.2	39167.1	11.1122	µm	Spot	Position	1	DCX-	DAPI+	2211
97963.5	39176.2	11.2958	µm	Spot	Position	1	DCX-	DAPI+	2212
97953.5	39180.1	11.1481	µm	Spot	Position	1	DCX-	DAPI+	2213
97957.9	39182	11.3625	µm	Spot	Position	1	DCX-	DAPI+	2215
97954.5	39183.3	11.297	µm	Spot	Position	1	DCX-	DAPI+	2216
97955.6	39183.7	11.2473	µm	Spot	Position	1	DCX-	DAPI+	2217
97955.5	39186.1	11.2638	µm	Spot	Position	1	DCX-	DAPI+	2218
97962.5	39168.1	11.5779	µm	Spot	Position	1	DCX-	DAPI+	2222
97955.5	39176.2	11.5877	µm	Spot	Position	1	DCX-	DAPI+	2223
97976.9	39207.6	11.4271	µm	Spot	Position	1	DCX-	DAPI+	2225
97964.4	39206.3	11.9422	µm	Spot	Position	1	DCX-	DAPI+	2229
97955.9	39209.9	11.793	µm	Spot	Position	1	DCX-	DAPI+	2230
97971.3	39210	11.783	µm	Spot	Position	1	DCX-	DAPI+	2231
97927.4	39220.6	10.9265	µm	Spot	Position	1	DCX-	DAPI+	2271
97929.7	39221.3	11.076	µm	Spot	Position	1	DCX-	DAPI+	2272
97932.4	39222.7	11.5829	µm	Spot	Position	1	DCX-	DAPI+	2282
97939.7	39247.2	11.608	µm	Spot	Position	1	DCX-	DAPI+	2285
97985.9	39213.5	10.9624	µm	Spot	Position	1	DCX-	DAPI+	2294
97978.2	39218.2	10.9171	µm	Spot	Position	1	DCX-	DAPI+	2295
97982.1	39228.9	11.0433	µm	Spot	Position	1	DCX-	DAPI+	2297
97984.6	39230.6	11.0828	µm	Spot	Position	1	DCX-	DAPI+	2298
97986.2	39232.9	11.0353	µm	Spot	Position	1	DCX-	DAPI+	2299
97985.5	39241.6	10.9734	µm	Spot	Position	1	DCX-	DAPI+	2300
97984.2	39242.9	11.085	µm	Spot	Position	1	DCX-	DAPI+	2301
97981.5	39243.7	11.0237	µm	Spot	Position	1	DCX-	DAPI+	2302
97984.6	39246.6	11.0462	µm	Spot	Position	1	DCX-	DAPI+	2305
97948	39230.1	11.1338	µm	Spot	Position	1	DCX-	DAPI+	2307
97978.7	39239.2	11.2423	µm	Spot	Position	1	DCX-	DAPI+	2310
97956.9	39249.9	11.2773	µm	Spot	Position	1	DCX-	DAPI+	2312
97942.4	39240.6	11.6546	µm	Spot	Position	1	DCX-	DAPI+	2315
97955.9	39219.6	11.9141	µm	Spot	Position	1	DCX-	DAPI+	2319
97987.1	39236.2	10.8316	µm	Spot	Position	1	DCX-	DAPI+	2321
97987.3	39253	11.8114	µm	Spot	Position	1	DCX-	DAPI+	2333
97926.5	39280.2	11.223	µm	Spot	Position	1	DCX-	DAPI+	2351
97931.9	39286.8	11.1224	µm	Spot	Position	1	DCX-	DAPI+	2355
97932.6	39290.6	11.3157	µm	Spot	Position	1	DCX-	DAPI+	2356
97930.9	39260.3	11.7923	µm	Spot	Position	1	DCX-	DAPI+	2362
97928.9	39282.1	11.9596	µm	Spot	Position	1	DCX-	DAPI+	2365
97975.1	39260.2	11.0569	µm	Spot	Position	1	DCX-	DAPI+	2367
97968.4	39283.9	10.9432	µm	Spot	Position	1	DCX-	DAPI+	2369
97945.3	39292.6	10.9501	µm	Spot	Position	1	DCX-	DAPI+	2373
97964.1	39302	11.0171	µm	Spot	Position	1	DCX-	DAPI+	2374
97984.2	39262.3	11.3429	µm	Spot	Position	1	DCX-	DAPI+	2376
97957.7	39273.1	11.2259	µm	Spot	Position	1	DCX-	DAPI+	2378
97970	39288.6	11.3134	µm	Spot	Position	1	DCX-	DAPI+	2381
97979.2	39300	11.2455	µm	Spot	Position	1	DCX-	DAPI+	2382
97979.1	39260.3	11.6161	µm	Spot	Position	1	DCX-	DAPI+	2384
97965.8	39262.8	11.5709	µm	Spot	Position	1	DCX-	DAPI+	2385
97983.1	39263.3	11.6355	µm	Spot	Position	1	DCX-	DAPI+	2386
97983	39265.7	11.4772	µm	Spot	Position	1	DCX-	DAPI+	2387
97986	39273.4	11.5632	µm	Spot	Position	1	DCX-	DAPI+	2388
97979	39287.1	11.4706	µm	Spot	Position	1	DCX-	DAPI+	2391
97950.1	39299	11.5408	µm	Spot	Position	1	DCX-	DAPI+	2392
97978.6	39261.4	11.7913	µm	Spot	Position	1	DCX-	DAPI+	2393
97984.1	39268.9	11.7809	µm	Spot	Position	1	DCX-	DAPI+	2394
97966.1	39269.9	11.7994	µm	Spot	Position	1	DCX-	DAPI+	2395
97979	39276.8	11.7997	µm	Spot	Position	1	DCX-	DAPI+	2397
97974.8	39277.6	11.9042	µm	Spot	Position	1	DCX-	DAPI+	2398
97966.8	39285.7	11.7119	µm	Spot	Position	1	DCX-	DAPI+	2400
97940.8	39289.4	11.9246	µm	Spot	Position	1	DCX-	DAPI+	2402
97990.7	39285.8	11.0574	µm	Spot	Position	1	DCX-	DAPI+	2406
97993.7	39286.1	11.0336	µm	Spot	Position	1	DCX-	DAPI+	2407
97988.1	39276.3	11.2948	µm	Spot	Position	1	DCX-	DAPI+	2409
97988.7	39298.5	11.2092	µm	Spot	Position	1	DCX-	DAPI+	2411
97992.8	39259.7	11.6307	µm	Spot	Position	1	DCX-	DAPI+	2412
98014.8	39285.8	11.4674	µm	Spot	Position	1	DCX-	DAPI+	2414
97995.3	39288.8	11.5074	µm	Spot	Position	1	DCX-	DAPI+	2417
97993.2	39291.8	11.4296	µm	Spot	Position	1	DCX-	DAPI+	2419
98001.5	39267.7	11.7813	µm	Spot	Position	1	DCX-	DAPI+	2422
97986.9	39272.2	11.7635	µm	Spot	Position	1	DCX-	DAPI+	2423
97996.7	39284.4	11.8917	µm	Spot	Position	1	DCX-	DAPI+	2425
97990.1	39297.8	11.8636	µm	Spot	Position	1	DCX-	DAPI+	2426
98009.2	39298.9	11.7571	µm	Spot	Position	1	DCX-	DAPI+	2427
98006.7	39302.8	11.8464	µm	Spot	Position	1	DCX-	DAPI+	2428
97972	39310.4	11.0693	µm	Spot	Position	1	DCX-	DAPI+	2451
97982.5	39320.5	10.8568	µm	Spot	Position	1	DCX-	DAPI+	2452
98012.7	39306.2	11.0186	µm	Spot	Position	1	DCX-	DAPI+	2459
97999	39309.4	10.9826	µm	Spot	Position	1	DCX-	DAPI+	2460
98012.3	39317.2	10.9899	µm	Spot	Position	1	DCX-	DAPI+	2461
98031	39344.8	11.0734	µm	Spot	Position	1	DCX-	DAPI+	2464
97994.7	39313.8	11.3255	µm	Spot	Position	1	DCX-	DAPI+	2467
97999.8	39324	11.3627	µm	Spot	Position	1	DCX-	DAPI+	2470
98000.2	39325.7	11.319	µm	Spot	Position	1	DCX-	DAPI+	2473
98029.1	39341.6	11.2524	µm	Spot	Position	1	DCX-	DAPI+	2474
97991.2	39307.7	11.5403	µm	Spot	Position	1	DCX-	DAPI+	2475
98029.8	39308	11.6432	µm	Spot	Position	1	DCX-	DAPI+	2476
98012	39309.9	11.5038	µm	Spot	Position	1	DCX-	DAPI+	2477
98008.4	39327.9	11.9212	µm	Spot	Position	1	DCX-	DAPI+	2485
98051	39336.3	10.9867	µm	Spot	Position	1	DCX-	DAPI+	2486
98044.9	39345.4	10.9273	µm	Spot	Position	1	DCX-	DAPI+	2487
98044	39341	11.1917	µm	Spot	Position	1	DCX-	DAPI+	2491
98020.1	39353.3	11.2735	µm	Spot	Position	1	DCX-	DAPI+	2540
98030.5	39353.9	11.3663	µm	Spot	Position	1	DCX-	DAPI+	2542
98033.4	39354.8	10.8426	µm	Spot	Position	1	DCX-	DAPI+	2547
98043.7	39361.9	10.9372	µm	Spot	Position	1	DCX-	DAPI+	2548
98077.6	39378.3	10.983	µm	Spot	Position	1	DCX-	DAPI+	2552
98069	39356.8	11.125	µm	Spot	Position	1	DCX-	DAPI+	2556
98033.2	39357.2	11.264	µm	Spot	Position	1	DCX-	DAPI+	2557
98073.4	39369.5	11.3039	µm	Spot	Position	1	DCX-	DAPI+	2560
98034	39351.2	11.7509	µm	Spot	Position	1	DCX-	DAPI+	2564
98041.9	39351.6	11.7486	µm	Spot	Position	1	DCX-	DAPI+	2565
98083.9	39390.3	11.3355	µm	Spot	Position	1	DCX-	DAPI+	2569
98081.6	39390.7	11.3096	µm	Spot	Position	1	DCX-	DAPI+	2570
98108	39394	11.3154	µm	Spot	Position	1	DCX-	DAPI+	2571
98098.7	39383.8	11.6828	µm	Spot	Position	1	DCX-	DAPI+	2572
98089.1	39389.8	11.5319	µm	Spot	Position	1	DCX-	DAPI+	2573
98093.6	39394.1	11.8642	µm	Spot	Position	1	DCX-	DAPI+	2576
98090.8	39398.7	10.8437	µm	Spot	Position	1	DCX-	DAPI+	2607
98109.3	39400.6	10.9708	µm	Spot	Position	1	DCX-	DAPI+	2608
98111.9	39409.4	11.521	µm	Spot	Position	1	DCX-	DAPI+	2610
98104	39413.5	11.5095	µm	Spot	Position	1	DCX-	DAPI+	2611
98114.4	39396.9	11.7576	µm	Spot	Position	1	DCX-	DAPI+	2614
98120.3	39399.8	11.8942	µm	Spot	Position	1	DCX-	DAPI+	2615
98111.6	39404.1	11.7606	µm	Spot	Position	1	DCX-	DAPI+	2616
98146.3	39422.4	10.9648	µm	Spot	Position	1	DCX-	DAPI+	2618
98134.9	39425	11.0049	µm	Spot	Position	1	DCX-	DAPI+	2619
98141.4	39432.8	11.077	µm	Spot	Position	1	DCX-	DAPI+	2621
98138.2	39418.1	11.3984	µm	Spot	Position	1	DCX-	DAPI+	2624
98136.2	39432.6	11.2688	µm	Spot	Position	1	DCX-	DAPI+	2626
98132.7	39433.4	11.2845	µm	Spot	Position	1	DCX-	DAPI+	2627
98153.6	39436.1	11.2185	µm	Spot	Position	1	DCX-	DAPI+	2628
98134	39426.7	11.5387	µm	Spot	Position	1	DCX-	DAPI+	2633
98138.8	39431.8	11.6206	µm	Spot	Position	1	DCX-	DAPI+	2634
98143.5	39409.8	11.8729	µm	Spot	Position	1	DCX-	DAPI+	2637
98137.6	39428.5	11.8543	µm	Spot	Position	1	DCX-	DAPI+	2639
98167.7	39431.6	11.843	µm	Spot	Position	1	DCX-	DAPI+	2640
98144.1	39432.9	11.9464	µm	Spot	Position	1	DCX-	DAPI+	2641
98164.4	39437.7	11.9119	µm	Spot	Position	1	DCX-	DAPI+	2642
98198	39464.6	10.9514	µm	Spot	Position	1	DCX-	DAPI+	2681
98209.2	39469	10.8464	µm	Spot	Position	1	DCX-	DAPI+	2683
98190.2	39445.9	11.3821	µm	Spot	Position	1	DCX-	DAPI+	2685
98185.5	39445.5	11.5212	µm	Spot	Position	1	DCX-	DAPI+	2686
98172	39448.6	11.4746	µm	Spot	Position	1	DCX-	DAPI+	2689
98188	39457.1	11.4323	µm	Spot	Position	1	DCX-	DAPI+	2690
98193	39460.1	11.5811	µm	Spot	Position	1	DCX-	DAPI+	2691
98187.6	39460.3	11.542	µm	Spot	Position	1	DCX-	DAPI+	2692
98196.1	39465.3	11.7822	µm	Spot	Position	1	DCX-	DAPI+	2695
98221.2	39480.8	10.8563	µm	Spot	Position	1	DCX-	DAPI+	2697
98241.6	39499	10.8525	µm	Spot	Position	1	DCX-	DAPI+	2733
98237.3	39499.3	10.9447	µm	Spot	Position	1	DCX-	DAPI+	2734
98239.5	39496.5	11.1577	µm	Spot	Position	1	DCX-	DAPI+	2737
98256	39513.8	11.2917	µm	Spot	Position	1	DCX-	DAPI+	2743
98250.6	39514.7	11.4373	µm	Spot	Position	1	DCX-	DAPI+	2744
98227.1	39488.7	11.7702	µm	Spot	Position	1	DCX-	DAPI+	2745
98239.8	39497.7	11.7314	µm	Spot	Position	1	DCX-	DAPI+	2748
98248.4	39511.4	11.8641	µm	Spot	Position	1	DCX-	DAPI+	2751
98268.4	39512.9	10.9941	µm	Spot	Position	1	DCX-	DAPI+	2754
98280.4	39518	10.8279	µm	Spot	Position	1	DCX-	DAPI+	2755
98270.8	39522.2	10.9829	µm	Spot	Position	1	DCX-	DAPI+	2756
98271.3	39515.9	11.3513	µm	Spot	Position	1	DCX-	DAPI+	2757
98283.1	39522.7	11.2499	µm	Spot	Position	1	DCX-	DAPI+	2758
98267.9	39499.4	11.6437	µm	Spot	Position	1	DCX-	DAPI+	2760
98268	39508.5	11.6667	µm	Spot	Position	1	DCX-	DAPI+	2761
98272.4	39509.5	11.7406	µm	Spot	Position	1	DCX-	DAPI+	2765
98313.3	39530.7	11.7207	µm	Spot	Position	1	DCX-	DAPI+	2775
98326.2	39531.4	11.777	µm	Spot	Position	1	DCX-	DAPI+	2776
98330.5	39533.9	11.727	µm	Spot	Position	1	DCX-	DAPI+	2777
98302.8	39536.4	10.8569	µm	Spot	Position	1	DCX-	DAPI+	2822
98304.6	39543.9	11.0334	µm	Spot	Position	1	DCX-	DAPI+	2824
98304.5	39541.4	11.993	µm	Spot	Position	1	DCX-	DAPI+	2832
98320.6	39536.7	10.8604	µm	Spot	Position	1	DCX-	DAPI+	2833
98334.6	39538.1	11.1062	µm	Spot	Position	1	DCX-	DAPI+	2834
98310.4	39536.3	11.911	µm	Spot	Position	1	DCX-	DAPI+	2846
98364.4	39559.1	10.8968	µm	Spot	Position	1	DCX-	DAPI+	2855
98401.2	39562.8	10.9562	µm	Spot	Position	1	DCX-	DAPI+	2856
98392.2	39568.2	10.9012	µm	Spot	Position	1	DCX-	DAPI+	2857
98362.1	39554.1	11.1224	µm	Spot	Position	1	DCX-	DAPI+	2858
98397.9	39562.1	11.3109	µm	Spot	Position	1	DCX-	DAPI+	2859
98364.6	39575.4	11.2493	µm	Spot	Position	1	DCX-	DAPI+	2860
98394.1	39576.8	11.257	µm	Spot	Position	1	DCX-	DAPI+	2863
98380.3	39549.7	11.6773	µm	Spot	Position	1	DCX-	DAPI+	2865
98368.2	39549.9	11.6657	µm	Spot	Position	1	DCX-	DAPI+	2866
98359.6	39554.9	11.6623	µm	Spot	Position	1	DCX-	DAPI+	2867
98396.8	39555.1	11.6202	µm	Spot	Position	1	DCX-	DAPI+	2868
98382.5	39565.4	11.63	µm	Spot	Position	1	DCX-	DAPI+	2869
98385.6	39568.5	11.4213	µm	Spot	Position	1	DCX-	DAPI+	2870
98392.8	39568.8	11.7046	µm	Spot	Position	1	DCX-	DAPI+	2871
98361.2	39569.2	11.4908	µm	Spot	Position	1	DCX-	DAPI+	2872
98372.8	39574.7	11.5572	µm	Spot	Position	1	DCX-	DAPI+	2873
98359.9	39575.8	11.5237	µm	Spot	Position	1	DCX-	DAPI+	2874
98359.2	39541.2	11.771	µm	Spot	Position	1	DCX-	DAPI+	2875
98366.5	39544.2	11.9518	µm	Spot	Position	1	DCX-	DAPI+	2876
98362.6	39545.5	11.7907	µm	Spot	Position	1	DCX-	DAPI+	2877
98368.9	39546.5	11.9455	µm	Spot	Position	1	DCX-	DAPI+	2878
98374.5	39558.7	11.9634	µm	Spot	Position	1	DCX-	DAPI+	2881
98427.6	39572.8	11.3983	µm	Spot	Position	1	DCX-	DAPI+	2885
98441	39577.8	11.5766	µm	Spot	Position	1	DCX-	DAPI+	2888
98431.5	39578	11.4429	µm	Spot	Position	1	DCX-	DAPI+	2889
98420.9	39578.2	11.5225	µm	Spot	Position	1	DCX-	DAPI+	2890
98425	39574	11.9555	µm	Spot	Position	1	DCX-	DAPI+	2892
98480.4	39563	10.9105	µm	Spot	Position	1	DCX-	DAPI+	2895
98476.7	39570.9	11.0095	µm	Spot	Position	1	DCX-	DAPI+	2896
98465.9	39576.9	10.9478	µm	Spot	Position	1	DCX-	DAPI+	2898
98462.9	39579.3	11.0041	µm	Spot	Position	1	DCX-	DAPI+	2899
98481.8	39568	11.1375	µm	Spot	Position	1	DCX-	DAPI+	2901
98487.1	39568.8	11.1092	µm	Spot	Position	1	DCX-	DAPI+	2902
98450.2	39577.8	11.2343	µm	Spot	Position	1	DCX-	DAPI+	2904
98472.8	39563.9	11.6815	µm	Spot	Position	1	DCX-	DAPI+	2908
98475	39566.8	11.4111	µm	Spot	Position	1	DCX-	DAPI+	2909
98475.4	39568.2	11.6388	µm	Spot	Position	1	DCX-	DAPI+	2910
98493.4	39574.9	11.4486	µm	Spot	Position	1	DCX-	DAPI+	2912
98459	39579.2	11.4085	µm	Spot	Position	1	DCX-	DAPI+	2913
98463.9	39562.1	11.9432	µm	Spot	Position	1	DCX-	DAPI+	2916
98470.1	39566.1	11.7691	µm	Spot	Position	1	DCX-	DAPI+	2917
98491.6	39574.4	11.8405	µm	Spot	Position	1	DCX-	DAPI+	2918
98454.6	39579.7	11.8082	µm	Spot	Position	1	DCX-	DAPI+	2919
98494.6	39572.6	11.5617	µm	Spot	Position	1	DCX-	DAPI+	2926
98525	39574.3	11.5275	µm	Spot	Position	1	DCX-	DAPI+	2928
98527.5	39579.5	11.6503	µm	Spot	Position	1	DCX-	DAPI+	2929
98542.8	39579.8	11.9044	µm	Spot	Position	1	DCX-	DAPI+	2938
98436.3	39580.5	11.6627	µm	Spot	Position	1	DCX-	DAPI+	2996
98452	39586.2	10.9754	µm	Spot	Position	1	DCX-	DAPI+	3001
98487	39591.3	10.8513	µm	Spot	Position	1	DCX-	DAPI+	3002
98475.7	39593.7	10.821	µm	Spot	Position	1	DCX-	DAPI+	3003
98449.8	39586.3	11.2448	µm	Spot	Position	1	DCX-	DAPI+	3004
98473	39593	11.4043	µm	Spot	Position	1	DCX-	DAPI+	3005
98489.3	39587.3	11.4656	µm	Spot	Position	1	DCX-	DAPI+	3008
98501.1	39590.6	10.9226	µm	Spot	Position	1	DCX-	DAPI+	3012
98504.9	39587	11.139	µm	Spot	Position	1	DCX-	DAPI+	3013
98534.3	39596.5	11.2636	µm	Spot	Position	1	DCX-	DAPI+	3016
98533.2	39599.2	11.3267	µm	Spot	Position	1	DCX-	DAPI+	3017
98537.8	39601.1	11.1908	µm	Spot	Position	1	DCX-	DAPI+	3018
98529.1	39584.7	11.6673	µm	Spot	Position	1	DCX-	DAPI+	3021
98532.8	39598	11.5218	µm	Spot	Position	1	DCX-	DAPI+	3022
98507.4	39599.1	11.5709	µm	Spot	Position	1	DCX-	DAPI+	3023
98498.5	39586.8	11.8748	µm	Spot	Position	1	DCX-	DAPI+	3028
98522.9	39596.2	11.7444	µm	Spot	Position	1	DCX-	DAPI+	3029
98539.6	39600.8	11.9027	µm	Spot	Position	1	DCX-	DAPI+	3031
98564.7	39596	11.5349	µm	Spot	Position	1	DCX-	DAPI+	3056
98547.7	39602.4	11.6923	µm	Spot	Position	1	DCX-	DAPI+	3057
98564.9	39597.7	11.7725	µm	Spot	Position	1	DCX-	DAPI+	3066
98609.7	39600.8	10.8876	µm	Spot	Position	1	DCX-	DAPI+	3070
98599.3	39598.6	11.2608	µm	Spot	Position	1	DCX-	DAPI+	3072
98697.5	39613.2	10.9717	µm	Spot	Position	1	DCX-	DAPI+	3086
98704.4	39624.7	10.9287	µm	Spot	Position	1	DCX-	DAPI+	3091
98682.6	39612	11.2328	µm	Spot	Position	1	DCX-	DAPI+	3095
98700.3	39615.9	11.3187	µm	Spot	Position	1	DCX-	DAPI+	3097
98725	39620.5	11.1621	µm	Spot	Position	1	DCX-	DAPI+	3098
98683.6	39607.9	11.5173	µm	Spot	Position	1	DCX-	DAPI+	3100
98691.5	39608.7	11.4977	µm	Spot	Position	1	DCX-	DAPI+	3101
98694.8	39609.7	11.6269	µm	Spot	Position	1	DCX-	DAPI+	3102
98691.8	39611.5	11.9596	µm	Spot	Position	1	DCX-	DAPI+	3111
98710.6	39618.4	11.839	µm	Spot	Position	1	DCX-	DAPI+	3113
98710.6	39620.1	11.944	µm	Spot	Position	1	DCX-	DAPI+	3114
98696.1	39621.6	11.94	µm	Spot	Position	1	DCX-	DAPI+	3115
98710	39622.4	11.8308	µm	Spot	Position	1	DCX-	DAPI+	3116
98748.5	39614.7	11.5652	µm	Spot	Position	1	DCX-	DAPI+	3118
97871.8	38225.3	12.1652	µm	Spot	Position	1	DCX-	DAPI+	3194
97882.5	38236.2	12.3579	µm	Spot	Position	1	DCX-	DAPI+	3196
97917.6	38198.6	12.2565	µm	Spot	Position	1	DCX-	DAPI+	3199
97936.8	38212.1	12.355	µm	Spot	Position	1	DCX-	DAPI+	3200
97931.2	38223.3	12.8835	µm	Spot	Position	1	DCX-	DAPI+	3202
97919.9	38231.2	12.6669	µm	Spot	Position	1	DCX-	DAPI+	3203
97897.4	38252.9	12.5921	µm	Spot	Position	1	DCX-	DAPI+	3218
97900.9	38255.7	12.8521	µm	Spot	Position	1	DCX-	DAPI+	3219
97912.8	38272.4	13.1761	µm	Spot	Position	1	DCX-	DAPI+	3220
97948.3	38254.3	13.0893	µm	Spot	Position	1	DCX-	DAPI+	3224
97933.2	38325.6	12.1388	µm	Spot	Position	1	DCX-	DAPI+	3235
97930.2	38344.6	12.4669	µm	Spot	Position	1	DCX-	DAPI+	3254
97923.4	38351.7	12.7652	µm	Spot	Position	1	DCX-	DAPI+	3256
97926.5	38340.6	13.046	µm	Spot	Position	1	DCX-	DAPI+	3258
97940.9	38335.9	12.1492	µm	Spot	Position	1	DCX-	DAPI+	3259
97942.5	38363.5	12.3615	µm	Spot	Position	1	DCX-	DAPI+	3267
97944.2	38345.3	13.0457	µm	Spot	Position	1	DCX-	DAPI+	3273
97949.5	38384.7	12.0525	µm	Spot	Position	1	DCX-	DAPI+	3288
97945.1	38423.6	12.2051	µm	Spot	Position	1	DCX-	DAPI+	3290
97948.6	38408.5	12.6808	µm	Spot	Position	1	DCX-	DAPI+	3293
97948.6	38445.7	12.7351	µm	Spot	Position	1	DCX-	DAPI+	3304
97954.8	38608.2	12.8719	µm	Spot	Position	1	DCX-	DAPI+	3359
97955.4	38614.1	12.4226	µm	Spot	Position	1	DCX-	DAPI+	3381
97950.9	38616.9	12.7103	µm	Spot	Position	1	DCX-	DAPI+	3382
97951.6	38623.7	12.7742	µm	Spot	Position	1	DCX-	DAPI+	3384
97948.1	38650.3	12.7878	µm	Spot	Position	1	DCX-	DAPI+	3385
97947.4	38641.5	13.1974	µm	Spot	Position	1	DCX-	DAPI+	3386
97948.9	38782	12.5041	µm	Spot	Position	1	DCX-	DAPI+	3476
97948.7	38785.6	12.4606	µm	Spot	Position	1	DCX-	DAPI+	3477
97937.2	38809.6	12.1592	µm	Spot	Position	1	DCX-	DAPI+	3491
97938.4	38812.1	13.01	µm	Spot	Position	1	DCX-	DAPI+	3499
97948.3	38800.8	12.1325	µm	Spot	Position	1	DCX-	DAPI+	3502
97940.9	38832.4	12.2235	µm	Spot	Position	1	DCX-	DAPI+	3503
97943.3	38798.1	12.7181	µm	Spot	Position	1	DCX-	DAPI+	3505
97944.7	38823.6	12.7813	µm	Spot	Position	1	DCX-	DAPI+	3507
97942.1	38805.8	13.0491	µm	Spot	Position	1	DCX-	DAPI+	3508
97947.6	38851.6	12.2392	µm	Spot	Position	1	DCX-	DAPI+	3538
97936	38933.2	13.0939	µm	Spot	Position	1	DCX-	DAPI+	3572
97945.9	38918.6	12.6976	µm	Spot	Position	1	DCX-	DAPI+	3573
97934.3	38935.3	12.0781	µm	Spot	Position	1	DCX-	DAPI+	3595
97935.6	38964.6	12.4616	µm	Spot	Position	1	DCX-	DAPI+	3605
97935.6	38949.2	12.8231	µm	Spot	Position	1	DCX-	DAPI+	3609
97939.5	38974.2	12.7836	µm	Spot	Position	1	DCX-	DAPI+	3613
97933.3	38952.6	13.1484	µm	Spot	Position	1	DCX-	DAPI+	3616
97933.1	38960.5	13.0834	µm	Spot	Position	1	DCX-	DAPI+	3617
97945	38942.6	12.9114	µm	Spot	Position	1	DCX-	DAPI+	3627
97935.8	39010.6	12.3338	µm	Spot	Position	1	DCX-	DAPI+	3657
97933.3	38980.4	12.891	µm	Spot	Position	1	DCX-	DAPI+	3658
97927.7	38994.6	13.0677	µm	Spot	Position	1	DCX-	DAPI+	3664
97944.2	39021	12.3061	µm	Spot	Position	1	DCX-	DAPI+	3670
97949.7	38999.9	13.1079	µm	Spot	Position	1	DCX-	DAPI+	3673
97923.3	39059.9	12.1692	µm	Spot	Position	1	DCX-	DAPI+	3705
97922.5	39063.3	12.1329	µm	Spot	Position	1	DCX-	DAPI+	3706
97919.9	39061	12.3278	µm	Spot	Position	1	DCX-	DAPI+	3707
97926.8	39065.9	12.5257	µm	Spot	Position	1	DCX-	DAPI+	3709
97921.2	39048.5	12.8698	µm	Spot	Position	1	DCX-	DAPI+	3711
97922.2	39055.1	13.0846	µm	Spot	Position	1	DCX-	DAPI+	3714
97942.3	39054.7	12.3175	µm	Spot	Position	1	DCX-	DAPI+	3719
97948.4	39035.4	13.1539	µm	Spot	Position	1	DCX-	DAPI+	3723
97927.5	39086.2	12.0564	µm	Spot	Position	1	DCX-	DAPI+	3755
97928.5	39086.6	12.1241	µm	Spot	Position	1	DCX-	DAPI+	3756
97923.3	39114.8	12.0305	µm	Spot	Position	1	DCX-	DAPI+	3757
97930.5	39116.5	12.2364	µm	Spot	Position	1	DCX-	DAPI+	3758
97925.2	39094.2	12.4103	µm	Spot	Position	1	DCX-	DAPI+	3761
97925.6	39102.5	12.5472	µm	Spot	Position	1	DCX-	DAPI+	3762
97922.6	39114.6	12.3763	µm	Spot	Position	1	DCX-	DAPI+	3763
97922.4	39115.7	12.8611	µm	Spot	Position	1	DCX-	DAPI+	3767
97919.4	39097.4	13.026	µm	Spot	Position	1	DCX-	DAPI+	3768
97928.1	39117.7	13.0098	µm	Spot	Position	1	DCX-	DAPI+	3770
97941.8	39105.2	12.8162	µm	Spot	Position	1	DCX-	DAPI+	3772
97941.9	39101.7	13.1243	µm	Spot	Position	1	DCX-	DAPI+	3773
97925.4	39121.4	12.283	µm	Spot	Position	1	DCX-	DAPI+	3836
97937.4	39142.5	12.0528	µm	Spot	Position	1	DCX-	DAPI+	3838
97924.7	39159.2	12.264	µm	Spot	Position	1	DCX-	DAPI+	3840
97923.3	39163.8	12.0576	µm	Spot	Position	1	DCX-	DAPI+	3841
97938.5	39130.3	12.5756	µm	Spot	Position	1	DCX-	DAPI+	3842
97930.4	39151.5	12.5128	µm	Spot	Position	1	DCX-	DAPI+	3844
97923	39156.7	12.5738	µm	Spot	Position	1	DCX-	DAPI+	3845
97931.5	39158.9	12.3684	µm	Spot	Position	1	DCX-	DAPI+	3846
97939.6	39135.3	12.8953	µm	Spot	Position	1	DCX-	DAPI+	3849
97939.1	39136.4	12.7243	µm	Spot	Position	1	DCX-	DAPI+	3850
97919.2	39139.9	12.73	µm	Spot	Position	1	DCX-	DAPI+	3851
97927	39140.6	12.7357	µm	Spot	Position	1	DCX-	DAPI+	3852
97928	39144.5	12.664	µm	Spot	Position	1	DCX-	DAPI+	3853
97926	39146.5	12.6405	µm	Spot	Position	1	DCX-	DAPI+	3854
97917.6	39160.5	12.6681	µm	Spot	Position	1	DCX-	DAPI+	3856
97933	39137.4	13.1678	µm	Spot	Position	1	DCX-	DAPI+	3857
97918.3	39147.5	13.0817	µm	Spot	Position	1	DCX-	DAPI+	3859
97916.1	39150.2	13.0484	µm	Spot	Position	1	DCX-	DAPI+	3860
97916.1	39154.3	13.0024	µm	Spot	Position	1	DCX-	DAPI+	3861
97949.4	39142.5	12.1181	µm	Spot	Position	1	DCX-	DAPI+	3864
97947.8	39153.3	12.1341	µm	Spot	Position	1	DCX-	DAPI+	3865
97941.1	39155.6	12.0189	µm	Spot	Position	1	DCX-	DAPI+	3866
97942.6	39156.9	12.2301	µm	Spot	Position	1	DCX-	DAPI+	3867
97959	39158.5	12.1005	µm	Spot	Position	1	DCX-	DAPI+	3868
97948.6	39162.9	12.0843	µm	Spot	Position	1	DCX-	DAPI+	3869
97949.7	39163.9	12.1651	µm	Spot	Position	1	DCX-	DAPI+	3870
97944.9	39123	12.5568	µm	Spot	Position	1	DCX-	DAPI+	3871
97943.6	39132	12.5811	µm	Spot	Position	1	DCX-	DAPI+	3872
97944.1	39131.2	12.8769	µm	Spot	Position	1	DCX-	DAPI+	3874
97944.9	39151.3	12.6204	µm	Spot	Position	1	DCX-	DAPI+	3876
97943.8	39156.8	12.6244	µm	Spot	Position	1	DCX-	DAPI+	3877
97948.1	39147.3	12.9918	µm	Spot	Position	1	DCX-	DAPI+	3879
97941.6	39160.6	13.0681	µm	Spot	Position	1	DCX-	DAPI+	3880
97962.8	39161	13.1715	µm	Spot	Position	1	DCX-	DAPI+	3881
97925.6	39191.8	12.282	µm	Spot	Position	1	DCX-	DAPI+	3945
97920.6	39185.1	12.4462	µm	Spot	Position	1	DCX-	DAPI+	3951
97920.5	39172	12.6407	µm	Spot	Position	1	DCX-	DAPI+	3958
97931.2	39178.7	12.7185	µm	Spot	Position	1	DCX-	DAPI+	3959
97920.3	39179	12.7383	µm	Spot	Position	1	DCX-	DAPI+	3960
97918	39182.2	12.8318	µm	Spot	Position	1	DCX-	DAPI+	3961
97930.4	39186.3	12.8031	µm	Spot	Position	1	DCX-	DAPI+	3962
97928.6	39189.8	12.8407	µm	Spot	Position	1	DCX-	DAPI+	3963
97922.8	39167.7	13.0823	µm	Spot	Position	1	DCX-	DAPI+	3964
97922.6	39182	13.0903	µm	Spot	Position	1	DCX-	DAPI+	3965
97924.6	39183	12.9808	µm	Spot	Position	1	DCX-	DAPI+	3967
97931	39197	12.9941	µm	Spot	Position	1	DCX-	DAPI+	3969
97961.3	39178.4	12.1908	µm	Spot	Position	1	DCX-	DAPI+	3973
97961.9	39187.6	12.0284	µm	Spot	Position	1	DCX-	DAPI+	3975
97959.8	39190.4	12.0943	µm	Spot	Position	1	DCX-	DAPI+	3976
97962.7	39201.7	12.192	µm	Spot	Position	1	DCX-	DAPI+	3978
97965.1	39208.9	12.2053	µm	Spot	Position	1	DCX-	DAPI+	3979
97951.1	39169.2	12.3509	µm	Spot	Position	1	DCX-	DAPI+	3980
97965.6	39180.8	12.5816	µm	Spot	Position	1	DCX-	DAPI+	3983
97963.8	39202.6	12.4647	µm	Spot	Position	1	DCX-	DAPI+	3984
97973.7	39205	12.5782	µm	Spot	Position	1	DCX-	DAPI+	3985
97950.4	39166.3	12.7423	µm	Spot	Position	1	DCX-	DAPI+	3986
97959	39184.7	13.1743	µm	Spot	Position	1	DCX-	DAPI+	3990
97963.4	39200.4	12.9629	µm	Spot	Position	1	DCX-	DAPI+	3991
97969.3	39202.7	13.1406	µm	Spot	Position	1	DCX-	DAPI+	3992
97966.8	39210.4	13.1092	µm	Spot	Position	1	DCX-	DAPI+	3995
97981.1	39214.1	12.2905	µm	Spot	Position	1	DCX-	DAPI+	4079
97954.7	39218.9	12.1328	µm	Spot	Position	1	DCX-	DAPI+	4080
97980.3	39226.9	12.0286	µm	Spot	Position	1	DCX-	DAPI+	4081
97983.6	39233.7	12.1481	µm	Spot	Position	1	DCX-	DAPI+	4082
97968.6	39242.9	12.1562	µm	Spot	Position	1	DCX-	DAPI+	4083
97971.7	39222.6	12.4305	µm	Spot	Position	1	DCX-	DAPI+	4084
97976.2	39228.6	12.4053	µm	Spot	Position	1	DCX-	DAPI+	4085
97984	39245.9	12.8701	µm	Spot	Position	1	DCX-	DAPI+	4087
97959.8	39248.9	12.8735	µm	Spot	Position	1	DCX-	DAPI+	4088
97983.4	39256.5	12.654	µm	Spot	Position	1	DCX-	DAPI+	4089
97969.5	39217.8	13.0447	µm	Spot	Position	1	DCX-	DAPI+	4090
97983.4	39221.9	12.9166	µm	Spot	Position	1	DCX-	DAPI+	4091
97979.2	39224.4	12.9263	µm	Spot	Position	1	DCX-	DAPI+	4092
97975.6	39233.8	13.0223	µm	Spot	Position	1	DCX-	DAPI+	4093
97970.7	39233.9	13.1785	µm	Spot	Position	1	DCX-	DAPI+	4094
97978.2	39235.9	12.9173	µm	Spot	Position	1	DCX-	DAPI+	4095
97943.9	39239.9	13.0691	µm	Spot	Position	1	DCX-	DAPI+	4096
97934.9	39286.2	13.1153	µm	Spot	Position	1	DCX-	DAPI+	4166
97949.7	39271.8	12.2615	µm	Spot	Position	1	DCX-	DAPI+	4167
97979.9	39285.6	12.2329	µm	Spot	Position	1	DCX-	DAPI+	4169
97949.8	39270.6	12.5107	µm	Spot	Position	1	DCX-	DAPI+	4174
97967.6	39270.9	12.5496	µm	Spot	Position	1	DCX-	DAPI+	4175
97948.1	39271.3	12.3911	µm	Spot	Position	1	DCX-	DAPI+	4176
97985.8	39277.1	12.5574	µm	Spot	Position	1	DCX-	DAPI+	4178
97970.3	39279.8	12.3945	µm	Spot	Position	1	DCX-	DAPI+	4179
97962.4	39300.3	12.4893	µm	Spot	Position	1	DCX-	DAPI+	4182
97982.3	39258.7	12.6863	µm	Spot	Position	1	DCX-	DAPI+	4183
97951	39272.2	12.6545	µm	Spot	Position	1	DCX-	DAPI+	4184
97975.9	39276.4	12.6763	µm	Spot	Position	1	DCX-	DAPI+	4185
97966.5	39266	12.941	µm	Spot	Position	1	DCX-	DAPI+	4188
97968	39279.9	12.9335	µm	Spot	Position	1	DCX-	DAPI+	4189
97948.4	39284.1	13.0785	µm	Spot	Position	1	DCX-	DAPI+	4191
98009.3	39290.3	12.1018	µm	Spot	Position	1	DCX-	DAPI+	4193
98015.9	39283	12.526	µm	Spot	Position	1	DCX-	DAPI+	4197
97999.6	39262.6	12.6608	µm	Spot	Position	1	DCX-	DAPI+	4199
98015.8	39275.3	12.7066	µm	Spot	Position	1	DCX-	DAPI+	4200
98017.8	39292.4	12.7362	µm	Spot	Position	1	DCX-	DAPI+	4202
97992.1	39294.2	12.7155	µm	Spot	Position	1	DCX-	DAPI+	4204
98010.8	39299.3	12.6675	µm	Spot	Position	1	DCX-	DAPI+	4205
97995.6	39281.7	13.0038	µm	Spot	Position	1	DCX-	DAPI+	4207
98012.3	39283.2	13.1761	µm	Spot	Position	1	DCX-	DAPI+	4208
97988	39308.2	12.1816	µm	Spot	Position	1	DCX-	DAPI+	4264
98017.8	39341.8	12.1426	µm	Spot	Position	1	DCX-	DAPI+	4268
98009.8	39327.2	12.4773	µm	Spot	Position	1	DCX-	DAPI+	4269
98021.7	39343.4	12.4206	µm	Spot	Position	1	DCX-	DAPI+	4272
98025.3	39349.1	12.5482	µm	Spot	Position	1	DCX-	DAPI+	4274
98007.7	39307.6	12.7117	µm	Spot	Position	1	DCX-	DAPI+	4275
98016.1	39338.3	12.7419	µm	Spot	Position	1	DCX-	DAPI+	4277
98028.3	39316.6	13.0513	µm	Spot	Position	1	DCX-	DAPI+	4280
97998	39319.6	13.0229	µm	Spot	Position	1	DCX-	DAPI+	4282
97997.5	39321.3	13.0216	µm	Spot	Position	1	DCX-	DAPI+	4283
98025.9	39324.5	13.01	µm	Spot	Position	1	DCX-	DAPI+	4284
98033.2	39328.9	12.012	µm	Spot	Position	1	DCX-	DAPI+	4287
98056.1	39342.6	12.1084	µm	Spot	Position	1	DCX-	DAPI+	4289
98049.9	39342.7	12.1851	µm	Spot	Position	1	DCX-	DAPI+	4290
98038.2	39344	12.2518	µm	Spot	Position	1	DCX-	DAPI+	4291
98044.2	39345.3	12.4017	µm	Spot	Position	1	DCX-	DAPI+	4295
98028.2	39351.7	12.263	µm	Spot	Position	1	DCX-	DAPI+	4360
98055.6	39359.3	12.0975	µm	Spot	Position	1	DCX-	DAPI+	4365
98074.5	39359.6	12.1438	µm	Spot	Position	1	DCX-	DAPI+	4366
98066.8	39355.5	12.7194	µm	Spot	Position	1	DCX-	DAPI+	4374
98048.2	39351.9	13.0763	µm	Spot	Position	1	DCX-	DAPI+	4376
98037.3	39356.9	13.0508	µm	Spot	Position	1	DCX-	DAPI+	4378
98039.7	39357.8	13.1874	µm	Spot	Position	1	DCX-	DAPI+	4379
98079.3	39374	12.2032	µm	Spot	Position	1	DCX-	DAPI+	4380
98096.6	39376.2	12.0937	µm	Spot	Position	1	DCX-	DAPI+	4381
98086.9	39383.5	12.8712	µm	Spot	Position	1	DCX-	DAPI+	4385
98084.2	39388	12.6485	µm	Spot	Position	1	DCX-	DAPI+	4387
98113.1	39409.8	12.0754	µm	Spot	Position	1	DCX-	DAPI+	4461
98092.8	39397	12.5321	µm	Spot	Position	1	DCX-	DAPI+	4464
98116.1	39400.5	12.9414	µm	Spot	Position	1	DCX-	DAPI+	4468
98147.1	39435.6	12.1384	µm	Spot	Position	1	DCX-	DAPI+	4470
98144.5	39424.7	12.3806	µm	Spot	Position	1	DCX-	DAPI+	4474
98152.9	39437.3	12.5674	µm	Spot	Position	1	DCX-	DAPI+	4475
98151.9	39421.6	12.8195	µm	Spot	Position	1	DCX-	DAPI+	4476
98149.8	39436.3	12.6721	µm	Spot	Position	1	DCX-	DAPI+	4479
98135.9	39416.5	13.0355	µm	Spot	Position	1	DCX-	DAPI+	4483
98197.5	39457	12.1865	µm	Spot	Position	1	DCX-	DAPI+	4576
98200.6	39459.4	12.4326	µm	Spot	Position	1	DCX-	DAPI+	4578
98211.9	39465.1	12.5747	µm	Spot	Position	1	DCX-	DAPI+	4579
98181	39443.2	12.7966	µm	Spot	Position	1	DCX-	DAPI+	4582
98195	39452.9	12.8328	µm	Spot	Position	1	DCX-	DAPI+	4583
98189.2	39456.9	12.7627	µm	Spot	Position	1	DCX-	DAPI+	4584
98205.3	39471.3	12.8028	µm	Spot	Position	1	DCX-	DAPI+	4585
98189.8	39445.2	12.9303	µm	Spot	Position	1	DCX-	DAPI+	4587
98192.9	39445.4	13.0752	µm	Spot	Position	1	DCX-	DAPI+	4588
98222.7	39484.7	12.2269	µm	Spot	Position	1	DCX-	DAPI+	4592
98250.1	39495.5	12.2037	µm	Spot	Position	1	DCX-	DAPI+	4662
98251.1	39511.1	12.2287	µm	Spot	Position	1	DCX-	DAPI+	4663
98252.1	39512.8	12.2561	µm	Spot	Position	1	DCX-	DAPI+	4665
98255.2	39517.1	12.1728	µm	Spot	Position	1	DCX-	DAPI+	4666
98252	39489.3	12.8451	µm	Spot	Position	1	DCX-	DAPI+	4670
98255.4	39489.6	13.1277	µm	Spot	Position	1	DCX-	DAPI+	4675
98264.4	39505.2	12.0623	µm	Spot	Position	1	DCX-	DAPI+	4676
98264.6	39513.8	12.2076	µm	Spot	Position	1	DCX-	DAPI+	4677
98294.2	39515.7	12.0982	µm	Spot	Position	1	DCX-	DAPI+	4678
98284.7	39517.4	12.1653	µm	Spot	Position	1	DCX-	DAPI+	4679
98297.8	39532.5	12.0652	µm	Spot	Position	1	DCX-	DAPI+	4682
98264.8	39500	12.6081	µm	Spot	Position	1	DCX-	DAPI+	4683
98288.6	39515	12.8611	µm	Spot	Position	1	DCX-	DAPI+	4688
98296	39530.8	12.6877	µm	Spot	Position	1	DCX-	DAPI+	4693
98266.1	39496.8	13.1977	µm	Spot	Position	1	DCX-	DAPI+	4694
98274.2	39506.5	13.1211	µm	Spot	Position	1	DCX-	DAPI+	4696
98283.5	39513	13.0704	µm	Spot	Position	1	DCX-	DAPI+	4697
98293.5	39517.6	13.1541	µm	Spot	Position	1	DCX-	DAPI+	4699
98331.8	39531.2	12.0193	µm	Spot	Position	1	DCX-	DAPI+	4701
98313.4	39534.2	12.5104	µm	Spot	Position	1	DCX-	DAPI+	4704
98333.3	39529.1	12.7039	µm	Spot	Position	1	DCX-	DAPI+	4707
98314.1	39530.1	13.0045	µm	Spot	Position	1	DCX-	DAPI+	4711
98307.8	39542.3	12.5777	µm	Spot	Position	1	DCX-	DAPI+	4818
98304.5	39536.3	12.7273	µm	Spot	Position	1	DCX-	DAPI+	4820
98329.2	39534.3	12.3078	µm	Spot	Position	1	DCX-	DAPI+	4827
98320.7	39539.4	12.136	µm	Spot	Position	1	DCX-	DAPI+	4829
98314.3	39554	12.0343	µm	Spot	Position	1	DCX-	DAPI+	4830
98353.1	39554.1	12.2153	µm	Spot	Position	1	DCX-	DAPI+	4831
98316.7	39555.2	12.091	µm	Spot	Position	1	DCX-	DAPI+	4833
98355.4	39556.6	12.2959	µm	Spot	Position	1	DCX-	DAPI+	4834
98317.9	39538.6	12.6544	µm	Spot	Position	1	DCX-	DAPI+	4839
98349.8	39544.7	13.0665	µm	Spot	Position	1	DCX-	DAPI+	4843
98380.1	39546.8	12.3016	µm	Spot	Position	1	DCX-	DAPI+	4851
98377	39559.3	12.1672	µm	Spot	Position	1	DCX-	DAPI+	4852
98389	39566	12.1591	µm	Spot	Position	1	DCX-	DAPI+	4853
98386.8	39576.8	12.2405	µm	Spot	Position	1	DCX-	DAPI+	4854
98365.8	39543.4	12.5426	µm	Spot	Position	1	DCX-	DAPI+	4855
98370.7	39544.9	12.4237	µm	Spot	Position	1	DCX-	DAPI+	4856
98360.5	39546.6	12.3299	µm	Spot	Position	1	DCX-	DAPI+	4858
98366.7	39546.6	12.4166	µm	Spot	Position	1	DCX-	DAPI+	4859
98394.4	39561.8	12.3234	µm	Spot	Position	1	DCX-	DAPI+	4860
98389.2	39569.1	12.405	µm	Spot	Position	1	DCX-	DAPI+	4862
98385.2	39565.7	12.7006	µm	Spot	Position	1	DCX-	DAPI+	4864
98394.7	39568	12.7057	µm	Spot	Position	1	DCX-	DAPI+	4865
98387.6	39571.9	12.7456	µm	Spot	Position	1	DCX-	DAPI+	4866
98395.6	39558.4	13.1186	µm	Spot	Position	1	DCX-	DAPI+	4870
98433.6	39576.6	12.0469	µm	Spot	Position	1	DCX-	DAPI+	4878
98421.4	39577.1	12.2111	µm	Spot	Position	1	DCX-	DAPI+	4879
98426.1	39577.5	12.4215	µm	Spot	Position	1	DCX-	DAPI+	4883
98404.6	39570.1	12.6538	µm	Spot	Position	1	DCX-	DAPI+	4887
98487.6	39566.3	12.1254	µm	Spot	Position	1	DCX-	DAPI+	4892
98486.9	39574.1	12.0335	µm	Spot	Position	1	DCX-	DAPI+	4893
98467.7	39562	12.4612	µm	Spot	Position	1	DCX-	DAPI+	4895
98490.8	39565.7	12.5087	µm	Spot	Position	1	DCX-	DAPI+	4896
98481.9	39571.4	12.312	µm	Spot	Position	1	DCX-	DAPI+	4897
98459.5	39580.2	12.4345	µm	Spot	Position	1	DCX-	DAPI+	4899
98472.9	39572.7	12.7941	µm	Spot	Position	1	DCX-	DAPI+	4901
98464.5	39560.3	13.0248	µm	Spot	Position	1	DCX-	DAPI+	4903
98482.3	39560.4	12.9844	µm	Spot	Position	1	DCX-	DAPI+	4904
98462.6	39561.8	13.1178	µm	Spot	Position	1	DCX-	DAPI+	4905
98478.7	39568.9	12.9582	µm	Spot	Position	1	DCX-	DAPI+	4906
98453	39577.7	13.0628	µm	Spot	Position	1	DCX-	DAPI+	4909
98531.8	39566.2	12.555	µm	Spot	Position	1	DCX-	DAPI+	4915
98536.9	39573	12.4849	µm	Spot	Position	1	DCX-	DAPI+	4918
98535.5	39579.6	12.4632	µm	Spot	Position	1	DCX-	DAPI+	4919
98526.3	39563.5	13.0131	µm	Spot	Position	1	DCX-	DAPI+	4925
98522.2	39569.6	13.0538	µm	Spot	Position	1	DCX-	DAPI+	4926
98533.5	39579.2	13.1604	µm	Spot	Position	1	DCX-	DAPI+	4927
98476.8	39580.7	12.2659	µm	Spot	Position	1	DCX-	DAPI+	5030
98474.8	39590.6	12.1485	µm	Spot	Position	1	DCX-	DAPI+	5032
98477.5	39593.9	12.1533	µm	Spot	Position	1	DCX-	DAPI+	5033
98483.9	39595.2	12.4906	µm	Spot	Position	1	DCX-	DAPI+	5036
98479.2	39596.4	13.0001	µm	Spot	Position	1	DCX-	DAPI+	5038
98512.8	39593.7	12.0361	µm	Spot	Position	1	DCX-	DAPI+	5041
98532.3	39596.9	12.1141	µm	Spot	Position	1	DCX-	DAPI+	5042
98540.5	39597.5	12.1432	µm	Spot	Position	1	DCX-	DAPI+	5043
98498.3	39584.9	12.5267	µm	Spot	Position	1	DCX-	DAPI+	5047
98536.5	39586.5	12.4049	µm	Spot	Position	1	DCX-	DAPI+	5048
98511	39587.4	12.3311	µm	Spot	Position	1	DCX-	DAPI+	5049
98507.6	39596.3	12.318	µm	Spot	Position	1	DCX-	DAPI+	5051
98509.7	39587.6	12.8586	µm	Spot	Position	1	DCX-	DAPI+	5055
98499	39587.8	12.7483	µm	Spot	Position	1	DCX-	DAPI+	5056
98498	39590.1	12.8632	µm	Spot	Position	1	DCX-	DAPI+	5057
98495	39590.8	12.7176	µm	Spot	Position	1	DCX-	DAPI+	5058
98538.7	39582.3	12.9472	µm	Spot	Position	1	DCX-	DAPI+	5060
98495.9	39591.1	13.1856	µm	Spot	Position	1	DCX-	DAPI+	5061
98526	39592.7	13.0443	µm	Spot	Position	1	DCX-	DAPI+	5062
98631.5	39595.9	12.4608	µm	Spot	Position	1	DCX-	DAPI+	5098
98632	39616.7	12.3136	µm	Spot	Position	1	DCX-	DAPI+	5103
98596.3	39593.7	12.6417	µm	Spot	Position	1	DCX-	DAPI+	5105
98594.2	39596.3	12.7388	µm	Spot	Position	1	DCX-	DAPI+	5106
98625	39610.6	12.9625	µm	Spot	Position	1	DCX-	DAPI+	5112
98716.3	39611.7	12.1706	µm	Spot	Position	1	DCX-	DAPI+	5128
98695.1	39617.4	12.2227	µm	Spot	Position	1	DCX-	DAPI+	5129
98703.5	39621.4	12.1572	µm	Spot	Position	1	DCX-	DAPI+	5130
98698.4	39601.9	12.4029	µm	Spot	Position	1	DCX-	DAPI+	5131
98707.9	39619	12.5647	µm	Spot	Position	1	DCX-	DAPI+	5134
98697.9	39604.3	12.6724	µm	Spot	Position	1	DCX-	DAPI+	5138
98699.5	39620.8	12.6525	µm	Spot	Position	1	DCX-	DAPI+	5142
98709.9	39623.2	12.7759	µm	Spot	Position	1	DCX-	DAPI+	5143
98687.1	39611.4	13.0191	µm	Spot	Position	1	DCX-	DAPI+	5148
98731.9	39615.1	12.4041	µm	Spot	Position	1	DCX-	DAPI+	5153
98733.7	39616.1	12.8669	µm	Spot	Position	1	DCX-	DAPI+	5156
98740.2	39612.3	13.0207	µm	Spot	Position	1	DCX-	DAPI+	5159
98738.9	39614.3	13.0505	µm	Spot	Position	1	DCX-	DAPI+	5161
97886.1	38156.7	13.8293	µm	Spot	Position	1	DCX-	DAPI+	5276
97902.5	38177.8	13.6552	µm	Spot	Position	1	DCX-	DAPI+	5279
97884.7	38205.6	14.3929	µm	Spot	Position	1	DCX-	DAPI+	5290
97876.9	38219.4	14.2216	µm	Spot	Position	1	DCX-	DAPI+	5291
97901	38239.2	13.6467	µm	Spot	Position	1	DCX-	DAPI+	5292
97912.9	38244.9	14.0348	µm	Spot	Position	1	DCX-	DAPI+	5311
97932.6	38277.1	13.8435	µm	Spot	Position	1	DCX-	DAPI+	5312
97924.7	38285.6	13.907	µm	Spot	Position	1	DCX-	DAPI+	5313
97923.4	38293	13.8689	µm	Spot	Position	1	DCX-	DAPI+	5336
97929.9	38378.5	13.4479	µm	Spot	Position	1	DCX-	DAPI+	5364
97943.1	38354.9	13.6144	µm	Spot	Position	1	DCX-	DAPI+	5367
97934.6	38393.8	13.6582	µm	Spot	Position	1	DCX-	DAPI+	5385
97947.7	38484.5	13.9711	µm	Spot	Position	1	DCX-	DAPI+	5442
97954.8	38559.1	13.6798	µm	Spot	Position	1	DCX-	DAPI+	5464
97951.3	38600.7	13.404	µm	Spot	Position	1	DCX-	DAPI+	5497
97952.5	38582.1	14.3508	µm	Spot	Position	1	DCX-	DAPI+	5501
97957.7	38629.5	14.2537	µm	Spot	Position	1	DCX-	DAPI+	5547
97948	38662	13.912	µm	Spot	Position	1	DCX-	DAPI+	5584
97946.8	38719.7	13.4268	µm	Spot	Position	1	DCX-	DAPI+	5626
97955.6	38724.2	13.4309	µm	Spot	Position	1	DCX-	DAPI+	5627
97948.7	38725.1	13.9902	µm	Spot	Position	1	DCX-	DAPI+	5631
97952.1	38731.8	14.4079	µm	Spot	Position	1	DCX-	DAPI+	5632
97954.9	38732.6	14.2489	µm	Spot	Position	1	DCX-	DAPI+	5633
97949.5	38791.4	13.8484	µm	Spot	Position	1	DCX-	DAPI+	5677
97942.8	38793.9	14.2155	µm	Spot	Position	1	DCX-	DAPI+	5681
97940.3	38800.3	13.449	µm	Spot	Position	1	DCX-	DAPI+	5710
[truncated: 1,170 more rows]

## Sheet: Sample 1-Slit2+DCX_Position - A
AC335 Slit2 555 DCX 488_ReProbe_[ii24_TileScan_2_Merged_Image_25]_Position
Position
====================
Position X	Position Y	Position Z	Unit	Category	Collection	Time	DCX	dapi	ID
88783.2	39994.9	0.852912	µm	Spot	Position	1		DAPI-	1143
88782.7	39996	0.83027	µm	Spot	Position	1		DAPI-	1144
88785	39995.3	0.974483	µm	Spot	Position	1		DAPI-	1228
88787.5	39995.2	1.04005	µm	Spot	Position	1		DAPI-	1229
88788.5	39995.7	1.06905	µm	Spot	Position	1		DAPI-	1230
88791.2	39995.7	1.14993	µm	Spot	Position	1		DAPI-	1231
88787.2	39996.1	1.03527	µm	Spot	Position	1		DAPI-	1232
88790	39996.2	1.12193	µm	Spot	Position	1		DAPI-	1233
88785.6	39996.3	0.959807	µm	Spot	Position	1		DAPI-	1234
88791.6	39996.4	1.15704	µm	Spot	Position	1		DAPI-	1235
88787	39996.9	1.03671	µm	Spot	Position	1		DAPI-	1236
88791.6	39997.3	1.17056	µm	Spot	Position	1		DAPI-	1237
88789.7	39997.4	1.11243	µm	Spot	Position	1		DAPI-	1238
88785.4	39997.6	0.951871	µm	Spot	Position	1		DAPI-	1239
88790.2	39998.1	1.11885	µm	Spot	Position	1		DAPI-	1240
88788.8	39998.4	1.06853	µm	Spot	Position	1		DAPI-	1241
88792	39998.3	1.19328	µm	Spot	Position	1		DAPI-	1242
88787.4	39998.4	1.04119	µm	Spot	Position	1		DAPI-	1243
88785.6	39998.8	0.974278	µm	Spot	Position	1		DAPI-	1244
88791	39999.2	1.15954	µm	Spot	Position	1		DAPI-	1245
88789.3	39999.6	1.08241	µm	Spot	Position	1		DAPI-	1246
88787.6	40000.3	1.05008	µm	Spot	Position	1		DAPI-	1247
88789.8	40000.5	1.12587	µm	Spot	Position	1		DAPI-	1248
88786.3	40001	0.999063	µm	Spot	Position	1		DAPI-	1249
88790.9	40001.4	1.15339	µm	Spot	Position	1		DAPI-	1250
88787.4	40002.1	1.05886	µm	Spot	Position	1		DAPI-	1251
88785.3	40002.3	0.987451	µm	Spot	Position	1		DAPI-	1252
88789.4	40002.3	1.11717	µm	Spot	Position	1		DAPI-	1253
88788.4	40002.5	1.07504	µm	Spot	Position	1		DAPI-	1254
88784.3	40003.1	0.983095	µm	Spot	Position	1		DAPI-	1255
88791.4	40003	1.18783	µm	Spot	Position	1		DAPI-	1256
88785.6	40003.4	0.991384	µm	Spot	Position	1		DAPI-	1257
88790.1	40003.4	1.13712	µm	Spot	Position	1		DAPI-	1258
88785.5	40004.2	0.990926	µm	Spot	Position	1		DAPI-	1259
88788.7	40004.3	1.09638	µm	Spot	Position	1		DAPI-	1260
88790.9	40004.3	1.17531	µm	Spot	Position	1		DAPI-	1261
88787.6	40004.9	1.08809	µm	Spot	Position	1		DAPI-	1262
88784.3	40005.1	0.983056	µm	Spot	Position	1		DAPI-	1263
88789	40005.5	1.11251	µm	Spot	Position	1		DAPI-	1264
88790.5	40005.7	1.1734	µm	Spot	Position	1		DAPI-	1265
88786	40006	1.03362	µm	Spot	Position	1		DAPI-	1266
88787.6	40005.9	1.08162	µm	Spot	Position	1		DAPI-	1267
88784.4	40006.1	0.978819	µm	Spot	Position	1		DAPI-	1268
88791	40006.4	1.18401	µm	Spot	Position	1		DAPI-	1269
88789.5	40006.6	1.12819	µm	Spot	Position	1		DAPI-	1270
88784.4	40007.4	1.01296	µm	Spot	Position	1		DAPI-	1271
88787.5	40007.3	1.07887	µm	Spot	Position	1		DAPI-	1272
88788.6	40007.8	1.10701	µm	Spot	Position	1		DAPI-	1273
88786	40007.9	1.0478	µm	Spot	Position	1		DAPI-	1274
88786.8	40007.9	1.09074	µm	Spot	Position	1		DAPI-	1275
88790.6	40008.4	1.16938	µm	Spot	Position	1		DAPI-	1276
88785.1	40008.9	1.01526	µm	Spot	Position	1		DAPI-	1277
88786.8	40008.7	1.08447	µm	Spot	Position	1		DAPI-	1278
88787.9	40009	1.10139	µm	Spot	Position	1		DAPI-	1279
88785.6	40009.5	1.04587	µm	Spot	Position	1		DAPI-	1280
88789.8	40009.8	1.1556	µm	Spot	Position	1		DAPI-	1281
88785.1	40010.2	1.01175	µm	Spot	Position	1		DAPI-	1282
88787.8	40010.4	1.10655	µm	Spot	Position	1		DAPI-	1283
88790.3	40010.6	1.17294	µm	Spot	Position	1		DAPI-	1284
88784.6	40011.2	1.03401	µm	Spot	Position	1		DAPI-	1285
88788.9	40011.4	1.1377	µm	Spot	Position	1		DAPI-	1286
88782.8	40011.5	0.92146	µm	Spot	Position	1		DAPI-	1287
88787.4	40011.4	1.095	µm	Spot	Position	1		DAPI-	1288
88783.7	40012.1	1.00375	µm	Spot	Position	1		DAPI-	1323
88785.9	40012	1.03458	µm	Spot	Position	1		DAPI-	1324
88789.9	40011.9	1.16338	µm	Spot	Position	1		DAPI-	1325
88782.8	40012.6	0.974725	µm	Spot	Position	1		DAPI-	1326
88787.6	40012.6	1.11091	µm	Spot	Position	1		DAPI-	1327
88783.7	40013.2	0.985259	µm	Spot	Position	1		DAPI-	1328
88788	40013.6	1.11527	µm	Spot	Position	1		DAPI-	1329
88789.3	40013.8	1.16413	µm	Spot	Position	1		DAPI-	1330
88785.1	40014.1	1.03324	µm	Spot	Position	1		DAPI-	1331
88786.2	40014.1	1.06295	µm	Spot	Position	1		DAPI-	1332
88789.3	40016.2	1.17606	µm	Spot	Position	1		DAPI-	1337
88063.8	40289.8	0.1501	µm	Spot	Position	1		DAPI-	1690
88085.2	40293.9	0.1501	µm	Spot	Position	1		DAPI-	1696
88087.6	40312.3	0.745408	µm	Spot	Position	1		DAPI-	1699
88068.9	40354.2	0.1501	µm	Spot	Position	1		DAPI-	1714
88049.4	40413.5	0.1501	µm	Spot	Position	1		DAPI-	1732
88064.9	40400.6	1.02085	µm	Spot	Position	1		DAPI-	1735
88799.2	39995	1.45009	µm	Spot	Position	1		DAPI-	3822
88793.6	39995.7	1.27822	µm	Spot	Position	1		DAPI-	3823
88795.2	39995.6	1.3164	µm	Spot	Position	1		DAPI-	3824
88797.2	39995.8	1.37629	µm	Spot	Position	1		DAPI-	3825
88798.4	39996.3	1.43188	µm	Spot	Position	1		DAPI-	3826
88794.1	39997.2	1.29707	µm	Spot	Position	1		DAPI-	3827
88796.6	39997.4	1.35508	µm	Spot	Position	1		DAPI-	3828
88798.6	39997.5	1.45018	µm	Spot	Position	1		DAPI-	3829
88794.9	39997.9	1.31532	µm	Spot	Position	1		DAPI-	3830
88792.9	39998.2	1.23506	µm	Spot	Position	1		DAPI-	3831
88795.6	39998.1	1.34568	µm	Spot	Position	1		DAPI-	3832
88797.1	39998.6	1.38031	µm	Spot	Position	1		DAPI-	3833
88793.5	39999.1	1.26812	µm	Spot	Position	1		DAPI-	3834
88794.6	39999.3	1.31685	µm	Spot	Position	1		DAPI-	3835
88799	39999.2	1.45209	µm	Spot	Position	1		DAPI-	3836
88795.9	39999.5	1.37509	µm	Spot	Position	1		DAPI-	3837
88796.6	39999.9	1.37654	µm	Spot	Position	1		DAPI-	3838
88795.8	40000.3	1.3836	µm	Spot	Position	1		DAPI-	3839
88793	40000.5	1.25599	µm	Spot	Position	1		DAPI-	3840
88794	40000.6	1.28009	µm	Spot	Position	1		DAPI-	3841
88796.7	40000.7	1.40292	µm	Spot	Position	1		DAPI-	3842
88799.2	40001.2	1.47202	µm	Spot	Position	1		DAPI-	3843
88795.2	40001.6	1.3463	µm	Spot	Position	1		DAPI-	3844
88796.6	40001.7	1.37962	µm	Spot	Position	1		DAPI-	3845
88798.2	40001.8	1.47139	µm	Spot	Position	1		DAPI-	3846
88792.7	40002.3	1.24689	µm	Spot	Position	1		DAPI-	3847
88794	40003	1.29766	µm	Spot	Position	1		DAPI-	3848
88798.6	40003.5	1.48838	µm	Spot	Position	1		DAPI-	3849
88795.9	40003.7	1.37808	µm	Spot	Position	1		DAPI-	3850
88797.3	40004.3	1.42389	µm	Spot	Position	1		DAPI-	3851
88793.6	40004.5	1.29647	µm	Spot	Position	1		DAPI-	3852
88795.6	40004.5	1.36598	µm	Spot	Position	1		DAPI-	3853
88792.8	40004.7	1.27494	µm	Spot	Position	1		DAPI-	3854
88792.9	40005.4	1.27745	µm	Spot	Position	1		DAPI-	3855
88798.7	40005.3	1.47016	µm	Spot	Position	1		DAPI-	3856
88797.9	40005.6	1.44787	µm	Spot	Position	1		DAPI-	3857
88795.4	40006.1	1.36408	µm	Spot	Position	1		DAPI-	3858
88793.4	40007.1	1.29865	µm	Spot	Position	1		DAPI-	3859
88794.5	40007.2	1.34291	µm	Spot	Position	1		DAPI-	3860
88797.7	40007.4	1.46039	µm	Spot	Position	1		DAPI-	3861
88798.6	40007.3	1.4851	µm	Spot	Position	1		DAPI-	3862
88791.8	40007.5	1.21271	µm	Spot	Position	1		DAPI-	3863
88792.9	40008.1	1.30188	µm	Spot	Position	1		DAPI-	3864
88795.4	40008.3	1.3723	µm	Spot	Position	1		DAPI-	3865
88796.4	40008.2	1.40115	µm	Spot	Position	1		DAPI-	3866
88798.1	40008.4	1.47036	µm	Spot	Position	1		DAPI-	3867
88794.1	40009	1.32308	µm	Spot	Position	1		DAPI-	3868
88791.6	40009.4	1.23117	µm	Spot	Position	1		DAPI-	3869
88796	40009.5	1.39876	µm	Spot	Position	1		DAPI-	3870
88798	40009.9	1.47296	µm	Spot	Position	1		DAPI-	3871
88791.1	40010.4	1.22155	µm	Spot	Position	1		DAPI-	3872
88793.8	40010.8	1.32172	µm	Spot	Position	1		DAPI-	3873
88795.7	40010.7	1.40469	µm	Spot	Position	1		DAPI-	3874
88797.9	40010.7	1.46128	µm	Spot	Position	1		DAPI-	3875
88792.1	40011.2	1.2774	µm	Spot	Position	1		DAPI-	3876
88794.5	40011.5	1.36428	µm	Spot	Position	1		DAPI-	3877
88805	39993.2	1.67289	µm	Spot	Position	1		DAPI-	3899
88802.6	39994	1.60312	µm	Spot	Position	1		DAPI-	3901
88805.5	39994.3	1.6995	µm	Spot	Position	1		DAPI-	3902
88803.7	39995	1.65293	µm	Spot	Position	1		DAPI-	3903
88802.2	39995.4	1.59402	µm	Spot	Position	1		DAPI-	3904
88801.1	39995.6	1.53607	µm	Spot	Position	1		DAPI-	3905
88804.6	39995.6	1.66761	µm	Spot	Position	1		DAPI-	3906
88805.6	39996.2	1.72563	µm	Spot	Position	1		DAPI-	3907
88806.4	39996.8	1.74109	µm	Spot	Position	1		DAPI-	3908
88801.1	39996.8	1.55705	µm	Spot	Position	1		DAPI-	3909
88803.6	39996.9	1.65375	µm	Spot	Position	1		DAPI-	3910
88804.9	39996.9	1.70122	µm	Spot	Position	1		DAPI-	3911
88802.8	39997.6	1.62764	µm	Spot	Position	1		DAPI-	3912
88806.4	39998	1.7545	µm	Spot	Position	1		DAPI-	3913
88804.9	39998.2	1.70787	µm	Spot	Position	1		DAPI-	3914
88800.5	39998.5	1.54407	µm	Spot	Position	1		DAPI-	3915
88802.9	39998.8	1.64774	µm	Spot	Position	1		DAPI-	3916
88805	39999.2	1.69937	µm	Spot	Position	1		DAPI-	3917
88799.9	39999.8	1.51859	µm	Spot	Position	1		DAPI-	3918
88803.6	40000.1	1.66617	µm	Spot	Position	1		DAPI-	3919
88806.2	40000.3	1.73139	µm	Spot	Position	1		DAPI-	3920
88802.3	40000.8	1.62732	µm	Spot	Position	1		DAPI-	3921
88803.7	40001	1.67023	µm	Spot	Position	1		DAPI-	3922
88806.7	40000.9	1.75847	µm	Spot	Position	1		DAPI-	3923
88800.4	40001.5	1.56581	µm	Spot	Position	1		DAPI-	3924
88802.8	40001.7	1.64468	µm	Spot	Position	1		DAPI-	3925
88804.9	40001.9	1.70848	µm	Spot	Position	1		DAPI-	3926
88806	40003.1	1.72497	µm	Spot	Position	1		DAPI-	3927
88801.3	40003.4	1.60798	µm	Spot	Position	1		DAPI-	3928
88799.9	40003.6	1.55558	µm	Spot	Position	1		DAPI-	3929
88802.4	40003.7	1.63764	µm	Spot	Position	1		DAPI-	3930
88803.7	40004.1	1.67965	µm	Spot	Position	1		DAPI-	3931
88804.9	40004.4	1.72104	µm	Spot	Position	1		DAPI-	3932
88799.6	40004.6	1.51193	µm	Spot	Position	1		DAPI-	3933
88802.4	40005.3	1.65668	µm	Spot	Position	1		DAPI-	3934
88800.7	40005.5	1.58095	µm	Spot	Position	1		DAPI-	3935
88803.7	40006.5	1.6825	µm	Spot	Position	1		DAPI-	3936
88805	40006.4	1.71836	µm	Spot	Position	1		DAPI-	3937
88801.3	40006.6	1.60233	µm	Spot	Position	1		DAPI-	3938
88800	40007	1.56894	µm	Spot	Position	1		DAPI-	3939
88806.3	40006.9	1.78964	µm	Spot	Position	1		DAPI-	3940
88803.6	40007.7	1.68427	µm	Spot	Position	1		DAPI-	3941
88802.7	40007.9	1.6481	µm	Spot	Position	1		DAPI-	3942
88799.7	40008.3	1.55413	µm	Spot	Position	1		DAPI-	3943
88800.6	40008.3	1.59628	µm	Spot	Position	1		DAPI-	3944
88804.5	40008.4	1.73501	µm	Spot	Position	1		DAPI-	3945
88805.5	40008.5	1.76069	µm	Spot	Position	1		DAPI-	3946
88806.4	40008.7	1.77485	µm	Spot	Position	1		DAPI-	3947
88802.5	40009.1	1.66221	µm	Spot	Position	1		DAPI-	3948
88804.7	40009.3	1.73649	µm	Spot	Position	1		DAPI-	3949
88801.4	40009.7	1.61728	µm	Spot	Position	1		DAPI-	3950
88799.6	40009.9	1.54295	µm	Spot	Position	1		DAPI-	3951
88803	40010.3	1.67955	µm	Spot	Position	1		DAPI-	3952
88801.1	40010.5	1.60959	µm	Spot	Position	1		DAPI-	3953
88805	40010.9	1.73887	µm	Spot	Position	1		DAPI-	3954
88805.9	40011.3	1.7816	µm	Spot	Position	1		DAPI-	3955
88810.1	39991.1	1.91659	µm	Spot	Position	1		DAPI-	3960
88809.4	39991.9	1.89417	µm	Spot	Position	1		DAPI-	3961
88810.1	39995.3	1.93372	µm	Spot	Position	1		DAPI-	3962
88810.1	39997.6	1.93447	µm	Spot	Position	1		DAPI-	3963
88810.2	39998.9	1.93614	µm	Spot	Position	1		DAPI-	3964
88808.5	39999.6	1.87572	µm	Spot	Position	1		DAPI-	3965
88807.6	40001.2	1.84031	µm	Spot	Position	1		DAPI-	3966
88809.9	40001.6	1.92705	µm	Spot	Position	1		DAPI-	3967
88807.8	40002.1	1.85974	µm	Spot	Position	1		DAPI-	3968
88810	40003.6	1.92388	µm	Spot	Position	1		DAPI-	3969
88808.2	40004.9	1.87569	µm	Spot	Position	1		DAPI-	3970
88810.1	40005.2	1.95152	µm	Spot	Position	1		DAPI-	3971
88807.2	40006	1.81183	µm	Spot	Position	1		DAPI-	3972
88810.2	40006.4	1.95255	µm	Spot	Position	1		DAPI-	3973
88808.2	40007	1.88187	µm	Spot	Position	1		DAPI-	3974
88810.1	40008.4	1.95287	µm	Spot	Position	1		DAPI-	3975
88808.1	40009.4	1.89446	µm	Spot	Position	1		DAPI-	3976
88807.3	40009.4	1.85175	µm	Spot	Position	1		DAPI-	3977
88810.1	40009.8	1.9527	µm	Spot	Position	1		DAPI-	3978
88808.7	40010.5	1.91564	µm	Spot	Position	1		DAPI-	3979
88807.4	40010.7	1.86401	µm	Spot	Position	1		DAPI-	3980
88810	40011.1	1.96107	µm	Spot	Position	1		DAPI-	3981
88792.8	40011.9	1.32184	µm	Spot	Position	1		DAPI-	3994
88797.7	40012	1.46076	µm	Spot	Position	1		DAPI-	3995
88790.8	40012.4	1.22171	µm	Spot	Position	1		DAPI-	3996
88791.7	40012.3	1.25503	µm	Spot	Position	1		DAPI-	3997
88795.4	40012.3	1.38343	µm	Spot	Position	1		DAPI-	3998
88794.1	40012.7	1.34834	µm	Spot	Position	1		DAPI-	3999
88793.5	40013.8	1.33578	µm	Spot	Position	1		DAPI-	4000
88796.4	40013.8	1.44414	µm	Spot	Position	1		DAPI-	4001
88791.8	40014	1.2889	µm	Spot	Position	1		DAPI-	4002
88793	40014.7	1.33633	µm	Spot	Position	1		DAPI-	4003
88797.5	40014.7	1.48085	µm	Spot	Position	1		DAPI-	4004
88796.4	40014.9	1.42431	µm	Spot	Position	1		DAPI-	4005
88791	40015	1.23334	µm	Spot	Position	1		DAPI-	4006
88793	40015.7	1.31946	µm	Spot	Position	1		DAPI-	4007
88792.1	40015.8	1.30868	µm	Spot	Position	1		DAPI-	4008
88795.8	40016.2	1.40721	µm	Spot	Position	1		DAPI-	4009
88794	40016.7	1.36928	µm	Spot	Position	1		DAPI-	4010
88792.1	40016.9	1.30989	µm	Spot	Position	1		DAPI-	4011
88791.3	40017.5	1.26847	µm	Spot	Position	1		DAPI-	4013
88794.6	40017.8	1.39938	µm	Spot	Position	1		DAPI-	4014
88792.4	40018.4	1.32284	µm	Spot	Position	1		DAPI-	4016
88795.8	40018.9	1.41747	µm	Spot	Position	1		DAPI-	4018
88794.1	40019.2	1.38734	µm	Spot	Position	1		DAPI-	4019
88796.1	40019.6	1.43469	µm	Spot	Position	1		DAPI-	4021
88794.8	40019.8	1.43469	µm	Spot	Position	1		DAPI-	4023
88795.5	40020.6	1.44399	µm	Spot	Position	1		DAPI-	4024
88794.5	40021.9	1.41727	µm	Spot	Position	1		DAPI-	4029
88795.9	40022.1	1.48741	µm	Spot	Position	1		DAPI-	4030
88805.5	40012	1.76161	µm	Spot	Position	1		DAPI-	4196
88802.9	40012.2	1.66696	µm	Spot	Position	1		DAPI-	4197
88804.4	40012.3	1.72942	µm	Spot	Position	1		DAPI-	4198
88800.8	40012.7	1.62	µm	Spot	Position	1		DAPI-	4199
88798.8	40013.3	1.5389	µm	Spot	Position	1		DAPI-	4200
88805.3	40013.8	1.76167	µm	Spot	Position	1		DAPI-	4201
88800.7	40014.5	1.6165	µm	Spot	Position	1		DAPI-	4202
88802.9	40014.6	1.68602	µm	Spot	Position	1		DAPI-	4203
88804.5	40014.7	1.74283	µm	Spot	Position	1		DAPI-	4204
88798.6	40015	1.52815	µm	Spot	Position	1		DAPI-	4205
88803.5	40015.6	1.71492	µm	Spot	Position	1		DAPI-	4206
88798.2	40015.7	1.52678	µm	Spot	Position	1		DAPI-	4207
88799.2	40016.2	1.56572	µm	Spot	Position	1		DAPI-	4208
88801	40016.3	1.62742	µm	Spot	Position	1		DAPI-	4209
88799.2	40017.3	1.58826	µm	Spot	Position	1		DAPI-	4210
88802.9	40017.4	1.70902	µm	Spot	Position	1		DAPI-	4211
88803.8	40017.4	1.75224	µm	Spot	Position	1		DAPI-	4212
88799.9	40017.6	1.62087	µm	Spot	Position	1		DAPI-	4213
88801.3	40017.8	1.66663	µm	Spot	Position	1		DAPI-	4214
88802.4	40018	1.71584	µm	Spot	Position	1		DAPI-	4215
88802.5	40019.2	1.71491	µm	Spot	Position	1		DAPI-	4216
88799	40019.6	1.59667	µm	Spot	Position	1		DAPI-	4217
88803.7	40019.6	1.7752	µm	Spot	Position	1		DAPI-	4218
88798.2	40019.9	1.57868	µm	Spot	Position	1		DAPI-	4219
88800.6	40020.2	1.67272	µm	Spot	Position	1		DAPI-	4220
88799.3	40020.7	1.61309	µm	Spot	Position	1		DAPI-	4221
88803.4	40021.1	1.77753	µm	Spot	Position	1		DAPI-	4222
88802.2	40021.3	1.72271	µm	Spot	Position	1		DAPI-	4223
88798.4	40021.6	1.60116	µm	Spot	Position	1		DAPI-	4224
88799.9	40021.5	1.67016	µm	Spot	Position	1		DAPI-	4225
88800.7	40022.3	1.67315	µm	Spot	Position	1		DAPI-	4226
88807.6	40011.6	1.87762	µm	Spot	Position	1		DAPI-	4385
88809.9	40012.4	1.95701	µm	Spot	Position	1		DAPI-	4386
88809.3	40013.1	1.92897	µm	Spot	Position	1		DAPI-	4387
88808.1	40013.5	1.90068	µm	Spot	Position	1		DAPI-	4388
88808.9	40013.9	1.9324	µm	Spot	Position	1		DAPI-	4389
88806.8	40014.4	1.84123	µm	Spot	Position	1		DAPI-	4390
88806	40014.5	1.82476	µm	Spot	Position	1		DAPI-	4391
88810.1	40014.8	1.98415	µm	Spot	Position	1		DAPI-	4392
88807.9	40015.5	1.93788	µm	Spot	Position	1		DAPI-	4393
88806.2	40015.9	1.83473	µm	Spot	Position	1		DAPI-	4394
88805.5	40017.2	1.8567	µm	Spot	Position	1		DAPI-	4395
88812.6	40017.5	2.086	µm	Spot	Position	1		DAPI-	4396
88810	40017.8	1.99549	µm	Spot	Position	1		DAPI-	4397
88806.9	40018.1	1.90534	µm	Spot	Position	1		DAPI-	4398
88807.7	40018.6	1.93939	µm	Spot	Position	1		DAPI-	4399
88810.1	40019.3	1.99947	µm	Spot	Position	1		DAPI-	4400
88804.9	40019.6	1.8465	µm	Spot	Position	1		DAPI-	4401
88807	40019.8	1.89358	µm	Spot	Position	1		DAPI-	4402
88809.2	40019.8	1.9748	µm	Spot	Position	1		DAPI-	4403
88812.1	40019.7	2.04438	µm	Spot	Position	1		DAPI-	4404
88805	40020.7	1.83002	µm	Spot	Position	1		DAPI-	4405
88807.7	40020.6	1.93509	µm	Spot	Position	1		DAPI-	4406
88809.5	40021.3	1.97701	µm	Spot	Position	1		DAPI-	4407
88807.1	40021.9	1.90335	µm	Spot	Position	1		DAPI-	4408
88810.1	40021.9	1.99774	µm	Spot	Position	1		DAPI-	4409
88804.9	40022.2	1.8322	µm	Spot	Position	1		DAPI-	4410
88808.6	40022.7	1.95861	µm	Spot	Position	1		DAPI-	4411
88815.2	40016.3	2.21392	µm	Spot	Position	1		DAPI-	4583
88815.1	40019.2	2.20289	µm	Spot	Position	1		DAPI-	4584
88817.3	40019.4	2.28436	µm	Spot	Position	1		DAPI-	4585
88815	40020.8	2.20988	µm	Spot	Position	1		DAPI-	4586
88814.9	40023.6	2.20272	µm	Spot	Position	1		DAPI-	4587
88078.7	40394.5	1.5069	µm	Spot	Position	1		DAPI-	5694
88040.7	40561	1.24564	µm	Spot	Position	1		DAPI-	5711
88838.1	39987.7	2.94354	µm	Spot	Position	1		DAPI-	7844
88834.4	39988.6	2.87909	µm	Spot	Position	1		DAPI-	7845
88837.5	39991	2.95494	µm	Spot	Position	1		DAPI-	7846
88839.2	39991.3	2.98051	µm	Spot	Position	1		DAPI-	7847
88839.5	39992.2	2.99052	µm	Spot	Position	1		DAPI-	7848
88833.8	39992.4	2.88638	µm	Spot	Position	1		DAPI-	7849
88835.1	39992.5	2.90845	µm	Spot	Position	1		DAPI-	7850
88837.6	39993.4	2.94942	µm	Spot	Position	1		DAPI-	7851
88838.5	39993.5	2.95418	µm	Spot	Position	1		DAPI-	7852
88833.9	39994.2	2.89044	µm	Spot	Position	1		DAPI-	7853
88836.3	39994.5	2.93749	µm	Spot	Position	1		DAPI-	7854
88837.7	39994.5	2.94717	µm	Spot	Position	1		DAPI-	7855
88834.7	39994.8	2.90899	µm	Spot	Position	1		DAPI-	7856
88838.3	39996.3	2.97552	µm	Spot	Position	1		DAPI-	7857
88835.7	39996.6	2.92366	µm	Spot	Position	1		DAPI-	7858
88833.8	39996.7	2.90634	µm	Spot	Position	1		DAPI-	7859
88836.3	39997.2	2.9399	µm	Spot	Position	1		DAPI-	7860
88833.8	39997.8	2.89201	µm	Spot	Position	1		DAPI-	7861
88836.3	39998.4	2.94681	µm	Spot	Position	1		DAPI-	7862
88838.3	39998.5	2.99211	µm	Spot	Position	1		DAPI-	7863
88837.1	39999.1	2.96198	µm	Spot	Position	1		DAPI-	7864
88837.9	39999.7	2.98008	µm	Spot	Position	1		DAPI-	7865
88834	39999.9	2.89557	µm	Spot	Position	1		DAPI-	7866
88834.9	40000.2	2.91109	µm	Spot	Position	1		DAPI-	7867
88838.3	40000.4	2.98967	µm	Spot	Position	1		DAPI-	7868
88839	40000.8	2.99857	µm	Spot	Position	1		DAPI-	7869
88835.1	40001.4	2.94876	µm	Spot	Position	1		DAPI-	7870
88836.9	40001.6	2.96828	µm	Spot	Position	1		DAPI-	7871
88837.7	40002.1	2.96577	µm	Spot	Position	1		DAPI-	7872
88834.1	40002.4	2.91207	µm	Spot	Position	1		DAPI-	7873
88834.9	40003.1	2.9251	µm	Spot	Position	1		DAPI-	7874
88836.5	40003.8	2.94194	µm	Spot	Position	1		DAPI-	7875
88837.5	40004.2	2.97084	µm	Spot	Position	1		DAPI-	7876
88834.1	40004.9	2.91613	µm	Spot	Position	1		DAPI-	7877
88837.3	40005	2.95509	µm	Spot	Position	1		DAPI-	7878
88835.4	40005.1	2.93024	µm	Spot	Position	1		DAPI-	7879
88837.4	40005.9	2.98242	µm	Spot	Position	1		DAPI-	7880
88833.7	40006.1	2.91831	µm	Spot	Position	1		DAPI-	7881
88838.3	40006.2	2.99061	µm	Spot	Position	1		DAPI-	7882
88836.8	40006.4	2.9822	µm	Spot	Position	1		DAPI-	7883
88835.5	40006.7	2.93922	µm	Spot	Position	1		DAPI-	7884
88833.9	40008	2.91436	µm	Spot	Position	1		DAPI-	7885
88834.9	40008.5	2.93191	µm	Spot	Position	1		DAPI-	7886
88837.2	40008.4	2.9906	µm	Spot	Position	1		DAPI-	7887
88834	40009	2.90379	µm	Spot	Position	1		DAPI-	7888
88834.3	40009.8	2.93966	µm	Spot	Position	1		DAPI-	7889
88835.8	40009.9	2.9548	µm	Spot	Position	1		DAPI-	7890
88837.3	40010.2	2.97931	µm	Spot	Position	1		DAPI-	7891
88849.8	39984.5	3.19899	µm	Spot	Position	1		DAPI-	7989
88848.8	39985.2	3.1822	µm	Spot	Position	1		DAPI-	7993
88850.6	39985.3	3.20867	µm	Spot	Position	1		DAPI-	7994
88848.1	39986	3.16776	µm	Spot	Position	1		DAPI-	7997
88846.9	39986.5	3.14217	µm	Spot	Position	1		DAPI-	7998
88850.7	39986.3	3.22609	µm	Spot	Position	1		DAPI-	7999
88849.7	39987	3.21173	µm	Spot	Position	1		DAPI-	8001
88843.9	39987.3	3.13434	µm	Spot	Position	1		DAPI-	8003
88841.1	39987.7	3.04016	µm	Spot	Position	1		DAPI-	8004
88846.8	39987.7	3.16015	µm	Spot	Position	1		DAPI-	8005
88852.1	39987.7	3.22051	µm	Spot	Position	1		DAPI-	8006
88846	39987.8	3.15482	µm	Spot	Position	1		DAPI-	8007
88848.2	39988.1	3.16898	µm	Spot	Position	1		DAPI-	8008
88844	39988.4	3.12279	µm	Spot	Position	1		DAPI-	8009
88842.8	39988.5	3.10142	µm	Spot	Position	1		DAPI-	8010
88845.4	39988.6	3.14801	µm	Spot	Position	1		DAPI-	8011
88851.7	39988.6	3.21858	µm	Spot	Position	1		DAPI-	8012
88849.4	39988.9	3.18865	µm	Spot	Position	1		DAPI-	8013
88850.9	39988.9	3.21299	µm	Spot	Position	1		DAPI-	8014
88854.5	39989	3.28019	µm	Spot	Position	1		DAPI-	8015
88841.3	39989.1	3.03485	µm	Spot	Position	1		DAPI-	8016
88843.5	39989.1	3.13329	µm	Spot	Position	1		DAPI-	8017
88847.2	39989.7	3.19031	µm	Spot	Position	1		DAPI-	8018
88854	39989.8	3.25371	µm	Spot	Position	1		DAPI-	8019
88845	39990.1	3.14046	µm	Spot	Position	1		DAPI-	8020
88846.2	39990.1	3.18091	µm	Spot	Position	1		DAPI-	8021
88849.3	39990.1	3.19891	µm	Spot	Position	1		DAPI-	8022
88843.9	39990.5	3.12824	µm	Spot	Position	1		DAPI-	8023
88852.4	39990.6	3.23124	µm	Spot	Position	1		DAPI-	8024
88841.6	39990.9	3.09809	µm	Spot	Position	1		DAPI-	8025
88846.7	39990.9	3.19225	µm	Spot	Position	1		DAPI-	8026
88845.4	39991.2	3.16157	µm	Spot	Position	1		DAPI-	8027
88855.1	39991.1	3.29752	µm	Spot	Position	1		DAPI-	8028
88850	39991.3	3.22229	µm	Spot	Position	1		DAPI-	8029
88848.3	39991.7	3.19497	µm	Spot	Position	1		DAPI-	8030
88842.5	39991.9	3.10229	µm	Spot	Position	1		DAPI-	8031
88841.4	39991.9	3.01305	µm	Spot	Position	1		DAPI-	8032
88844.8	39992	3.14652	µm	Spot	Position	1		DAPI-	8033
88849.5	39992.1	3.20588	µm	Spot	Position	1		DAPI-	8034
88846.7	39992.5	3.17615	µm	Spot	Position	1		DAPI-	8035
88855.1	39992.6	3.29772	µm	Spot	Position	1		DAPI-	8036
88850.5	39992.7	3.23788	µm	Spot	Position	1		DAPI-	8037
88851.6	39992.9	3.23925	µm	Spot	Position	1		DAPI-	8038
88853.9	39992.9	3.27882	µm	Spot	Position	1		DAPI-	8039
88849.1	39993.1	3.21023	µm	Spot	Position	1		DAPI-	8040
88843.6	39993.3	3.12743	µm	Spot	Position	1		DAPI-	8041
88849.7	39993.6	3.21262	µm	Spot	Position	1		DAPI-	8042
88850.5	39993.9	3.2341	µm	Spot	Position	1		DAPI-	8043
88842.7	39994	3.09975	µm	Spot	Position	1		DAPI-	8044
88845	39994.2	3.15228	µm	Spot	Position	1		DAPI-	8045
88846.7	39994.3	3.17208	µm	Spot	Position	1		DAPI-	8046
88853.1	39994.4	3.28296	µm	Spot	Position	1		DAPI-	8047
88854.6	39994.3	3.28983	µm	Spot	Position	1		DAPI-	8048
88847.5	39994.5	3.1896	µm	Spot	Position	1		DAPI-	8049
88839.7	39994.8	3.04747	µm	Spot	Position	1		DAPI-	8050
88848.9	39995.1	3.222	µm	Spot	Position	1		DAPI-	8051
88852.4	39995.2	3.26228	µm	Spot	Position	1		DAPI-	8052
88846.7	39995.4	3.18123	µm	Spot	Position	1		DAPI-	8053
88844	39996	3.14846	µm	Spot	Position	1		DAPI-	8054
88852.4	39996	3.2725	µm	Spot	Position	1		DAPI-	8055
88841.5	39996.4	3.06656	µm	Spot	Position	1		DAPI-	8056
88848.4	39996.4	3.21027	µm	Spot	Position	1		DAPI-	8057
88845.2	39996.6	3.15669	µm	Spot	Position	1		DAPI-	8058
88850	39996.5	3.22309	µm	Spot	Position	1		DAPI-	8059
88843.3	39996.6	3.13729	µm	Spot	Position	1		DAPI-	8060
88846.3	39997.3	3.18035	µm	Spot	Position	1		DAPI-	8061
88847.9	39997.6	3.2033	µm	Spot	Position	1		DAPI-	8062
88852.1	39997.6	3.25098	µm	Spot	Position	1		DAPI-	8063
88839.7	39997.7	3.01536	µm	Spot	Position	1		DAPI-	8064
88841.4	39997.8	3.06899	µm	Spot	Position	1		DAPI-	8065
88843.5	39997.8	3.131	µm	Spot	Position	1		DAPI-	8066
88845.1	39998	3.16063	µm	Spot	Position	1		DAPI-	8067
88849.3	39998.3	3.22605	µm	Spot	Position	1		DAPI-	8068
88839.9	39998.8	3.02027	µm	Spot	Position	1		DAPI-	8069
88852.7	39998.8	3.28573	µm	Spot	Position	1		DAPI-	8070
88845	39998.9	3.15463	µm	Spot	Position	1		DAPI-	8071
88842.4	39999	3.08133	µm	Spot	Position	1		DAPI-	8072
88847.9	39999.5	3.20415	µm	Spot	Position	1		DAPI-	8073
88852.1	39999.6	3.26855	µm	Spot	Position	1		DAPI-	8074
88840.1	39999.8	3.02059	µm	Spot	Position	1		DAPI-	8075
88850	39999.7	3.24032	µm	Spot	Position	1		DAPI-	8076
88843.4	39999.9	3.14019	µm	Spot	Position	1		DAPI-	8077
88844.4	40000	3.14431	µm	Spot	Position	1		DAPI-	8078
88841.7	40000.2	3.08922	µm	Spot	Position	1		DAPI-	8079
88842.6	40000.1	3.11161	µm	Spot	Position	1		DAPI-	8080
88846.6	40000.1	3.18132	µm	Spot	Position	1		DAPI-	8081
88847.9	40000.5	3.21899	µm	Spot	Position	1		DAPI-	8082
88850.3	40000.5	3.2527	µm	Spot	Position	1		DAPI-	8083
88849.6	40000.8	3.23163	µm	Spot	Position	1		DAPI-	8084
88852.3	40001.1	3.26135	µm	Spot	Position	1		DAPI-	8085
88841.5	40001.2	3.09703	µm	Spot	Position	1		DAPI-	8086
88847.4	40001.3	3.19035	µm	Spot	Position	1		DAPI-	8087
88845.2	40001.6	3.15484	µm	Spot	Position	1		DAPI-	8088
88851.3	40001.5	3.26641	µm	Spot	Position	1		DAPI-	8089
88840	40001.8	3.02902	µm	Spot	Position	1		DAPI-	8090
88842.1	40001.7	3.10845	µm	Spot	Position	1		DAPI-	8091
88848	40001.8	3.20618	µm	Spot	Position	1		DAPI-	8092
88849.8	40001.8	3.2399	µm	Spot	Position	1		DAPI-	8093
88852.4	40001.9	3.27339	µm	Spot	Position	1		DAPI-	8094
88843.3	40002.1	3.11664	µm	Spot	Position	1		DAPI-	8095
88845.1	40002.9	3.18083	µm	Spot	Position	1		DAPI-	8096
88848	40002.8	3.20472	µm	Spot	Position	1		DAPI-	8097
88850.2	40002.9	3.25602	µm	Spot	Position	1		DAPI-	8098
88841.2	40003.1	3.07285	µm	Spot	Position	1		DAPI-	8099
88847.2	40003.4	3.19171	µm	Spot	Position	1		DAPI-	8100
88845.8	40003.5	3.17326	µm	Spot	Position	1		DAPI-	8101
88852.1	40003.6	3.26253	µm	Spot	Position	1		DAPI-	8102
88839.9	40003.7	3.06484	µm	Spot	Position	1		DAPI-	8103
88844.5	40003.7	3.16855	µm	Spot	Position	1		DAPI-	8104
88848.1	40003.7	3.21555	µm	Spot	Position	1		DAPI-	8105
88850.8	40004	3.25526	µm	Spot	Position	1		DAPI-	8106
88849	40004.3	3.24329	µm	Spot	Position	1		DAPI-	8107
88852.2	40004.5	3.27865	µm	Spot	Position	1		DAPI-	8108
88841.7	40004.6	3.08042	µm	Spot	Position	1		DAPI-	8109
88840.5	40004.8	3.05432	µm	Spot	Position	1		DAPI-	8110
88844.4	40004.8	3.15159	µm	Spot	Position	1		DAPI-	8111
88842.3	40005.2	3.11617	µm	Spot	Position	1		DAPI-	8112
88846.6	40005.4	3.20354	µm	Spot	Position	1		DAPI-	8113
88848.1	40005.4	3.21943	µm	Spot	Position	1		DAPI-	8114
88849.2	40005.7	3.24259	µm	Spot	Position	1		DAPI-	8115
88840.3	40005.9	3.07194	µm	Spot	Position	1		DAPI-	8116
88843.8	40005.9	3.15553	µm	Spot	Position	1		DAPI-	8117
88844.8	40005.9	3.15994	µm	Spot	Position	1		DAPI-	8118
88852.6	40005.9	3.29277	µm	Spot	Position	1		DAPI-	8119
88850.5	40006.2	3.26233	µm	Spot	Position	1		DAPI-	8120
88845.7	40006.7	3.18702	µm	Spot	Position	1		DAPI-	8121
88839.6	40006.8	3.04215	µm	Spot	Position	1		DAPI-	8122
88847	40006.7	3.20588	µm	Spot	Position	1		DAPI-	8123
88851.8	40006.8	3.29684	µm	Spot	Position	1		DAPI-	8124
88847.8	40007	3.22611	µm	Spot	Position	1		DAPI-	8125
88843.9	40007.1	3.15112	µm	Spot	Position	1		DAPI-	8126
88844.9	40007.2	3.16834	µm	Spot	Position	1		DAPI-	8127
88841.9	40007.3	3.12359	µm	Spot	Position	1		DAPI-	8128
88849.3	40007.3	3.24307	µm	Spot	Position	1		DAPI-	8129
88838.4	40007.5	3.01997	µm	Spot	Position	1		DAPI-	8130
88852.3	40007.5	3.28627	µm	Spot	Position	1		DAPI-	8131
88840.4	40007.8	3.07987	µm	Spot	Position	1		DAPI-	8132
88843.4	40007.9	3.13156	µm	Spot	Position	1		DAPI-	8133
88844.9	40008	3.16959	µm	Spot	Position	1		DAPI-	8134
88846.8	40008.3	3.20353	µm	Spot	Position	1		DAPI-	8135
88849.8	40008.2	3.24709	µm	Spot	Position	1		DAPI-	8136
88842	40008.4	3.12171	µm	Spot	Position	1		DAPI-	8137
88843.4	40008.7	3.12989	µm	Spot	Position	1		DAPI-	8138
88847.9	40008.7	3.21085	µm	Spot	Position	1		DAPI-	8139
88850.4	40009	3.25404	µm	Spot	Position	1		DAPI-	8140
88841.8	40009.2	3.08164	µm	Spot	Position	1		DAPI-	8141
88840.8	40009.3	3.08117	µm	Spot	Position	1		DAPI-	8142
88844.9	40009.5	3.18254	µm	Spot	Position	1		DAPI-	8143
88843.3	40009.7	3.15387	µm	Spot	Position	1		DAPI-	8144
88847.6	40009.6	3.212	µm	Spot	Position	1		DAPI-	8145
88840	40009.8	3.06932	µm	Spot	Position	1		DAPI-	8146
88849	40009.8	3.24119	µm	Spot	Position	1		DAPI-	8147
88849.8	40010	3.24448	µm	Spot	Position	1		DAPI-	8148
88846.8	40010.3	3.20901	µm	Spot	Position	1		DAPI-	8149
88840.9	40010.3	3.09867	µm	Spot	Position	1		DAPI-	8150
88845	40010.3	3.16593	µm	Spot	Position	1		DAPI-	8151
88852.2	40010.4	3.29738	µm	Spot	Position	1		DAPI-	8152
88851.1	40010.8	3.28445	µm	Spot	Position	1		DAPI-	8153
88844.6	40011.1	3.1707	µm	Spot	Position	1		DAPI-	8154
88839.2	40011.3	3.01101	µm	Spot	Position	1		DAPI-	8155
88842	40011.3	3.1219	µm	Spot	Position	1		DAPI-	8156
88849.2	40011.5	3.26179	µm	Spot	Position	1		DAPI-	8157
88855.3	39988.8	3.32293	µm	Spot	Position	1		DAPI-	8198
88858.9	39990.2	3.40826	µm	Spot	Position	1		DAPI-	8201
88859.4	39991	3.42741	µm	Spot	Position	1		DAPI-	8202
88856.6	39991.4	3.36746	µm	Spot	Position	1		DAPI-	8203
88858.3	39991.9	3.42133	µm	Spot	Position	1		DAPI-	8204
88856.1	39993.2	3.33987	µm	Spot	Position	1		DAPI-	8205
88857.1	39993.7	3.37459	µm	Spot	Position	1		DAPI-	8206
88858.4	39993.9	3.39876	µm	Spot	Position	1		DAPI-	8207
88859.3	39993.9	3.42545	µm	Spot	Position	1		DAPI-	8208
88856.3	39994.9	3.38929	µm	Spot	Position	1		DAPI-	8209
88859.6	39994.8	3.43842	µm	Spot	Position	1		DAPI-	8210
88858.2	39995.2	3.42491	µm	Spot	Position	1		DAPI-	8211
88854.6	39995.5	3.32796	µm	Spot	Position	1		DAPI-	8212
88857.1	39995.5	3.39758	µm	Spot	Position	1		DAPI-	8213
88853.2	39995.7	3.32701	µm	Spot	Position	1		DAPI-	8214
88858.8	39995.9	3.44285	µm	Spot	Position	1		DAPI-	8215
88858.7	39997.1	3.42824	µm	Spot	Position	1		DAPI-	8216
88857.5	39997.5	3.41588	µm	Spot	Position	1		DAPI-	8217
88854.6	39997.8	3.33345	µm	Spot	Position	1		DAPI-	8218
88856.1	39998.3	3.40037	µm	Spot	Position	1		DAPI-	8219
88857.6	39998.8	3.41595	µm	Spot	Position	1		DAPI-	8220
88858.8	39998.7	3.43748	µm	Spot	Position	1		DAPI-	8221
88854.4	39999	3.32255	µm	Spot	Position	1		DAPI-	8222
88857	40000.2	3.39022	µm	Spot	Position	1		DAPI-	8223
88858.8	40000.6	3.4472	µm	Spot	Position	1		DAPI-	8224
88856.3	40001.5	3.41019	µm	Spot	Position	1		DAPI-	8225
88857.3	40001.6	3.39833	µm	Spot	Position	1		DAPI-	8226
88854.8	40002	3.35482	µm	Spot	Position	1		DAPI-	8227
88857.6	40002.6	3.42024	µm	Spot	Position	1		DAPI-	8228
88853	40002.8	3.32697	µm	Spot	Position	1		DAPI-	8229
88859.3	40003.2	3.45248	µm	Spot	Position	1		DAPI-	8230
88854.7	40003.4	3.35888	µm	Spot	Position	1		DAPI-	8231
88856.9	40003.4	3.41369	µm	Spot	Position	1		DAPI-	8232
88853.2	40003.7	3.32382	µm	Spot	Position	1		DAPI-	8233
88859.3	40004.1	3.45926	µm	Spot	Position	1		DAPI-	8234
88853.9	40004.8	3.34014	µm	Spot	Position	1		DAPI-	8235
88857.4	40005.2	3.44128	µm	Spot	Position	1		DAPI-	8236
88855.1	40005.5	3.38905	µm	Spot	Position	1		DAPI-	8237
88858.3	40005.7	3.46415	µm	Spot	Position	1		DAPI-	8238
88856.5	40006.1	3.42275	µm	Spot	Position	1		DAPI-	8239
88858.3	40006.6	3.46612	µm	Spot	Position	1		DAPI-	8240
88859.5	40007.2	3.48478	µm	Spot	Position	1		DAPI-	8241
88855.2	40007.4	3.38043	µm	Spot	Position	1		DAPI-	8242
88857.6	40007.7	3.44545	µm	Spot	Position	1		DAPI-	8243
88856.3	40008.3	3.43103	µm	Spot	Position	1		DAPI-	8244
88858.7	40008.2	3.47535	µm	Spot	Position	1		DAPI-	8245
88852.1	40008.4	3.31305	µm	Spot	Position	1		DAPI-	8246
88853.7	40009.3	3.38807	µm	Spot	Position	1		DAPI-	8247
88854.8	40009.4	3.39298	µm	Spot	Position	1		DAPI-	8248
88858.7	40009.6	3.48561	µm	Spot	Position	1		DAPI-	8249
88856.9	40009.7	3.43614	µm	Spot	Position	1		DAPI-	8250
88859.8	40010.4	3.49177	µm	Spot	Position	1		DAPI-	8251
88857.2	40010.8	3.44997	µm	Spot	Position	1		DAPI-	8252
88858.2	40010.8	3.47154	µm	Spot	Position	1		DAPI-	8253
88855.6	40011	3.42268	µm	Spot	Position	1		DAPI-	8254
88852.6	40011.1	3.33242	µm	Spot	Position	1		DAPI-	8255
88867.8	39989.7	3.55894	µm	Spot	Position	1		DAPI-	8368
88869.3	39990	3.59612	µm	Spot	Position	1		DAPI-	8369
88866.6	39990.5	3.53318	µm	Spot	Position	1		DAPI-	8370
88864.3	39990.8	3.51265	µm	Spot	Position	1		DAPI-	8371
88861.9	39991.1	3.46329	µm	Spot	Position	1		DAPI-	8372
88860.4	39991.3	3.4496	µm	Spot	Position	1		DAPI-	8373
88862.5	39991.8	3.46921	µm	Spot	Position	1		DAPI-	8374
88864.3	39991.8	3.5004	µm	Spot	Position	1		DAPI-	8375
88865	39991.9	3.51444	µm	Spot	Position	1		DAPI-	8376
88868.1	39992.4	3.57866	µm	Spot	Position	1		DAPI-	8377
88866.7	39992.7	3.53977	µm	Spot	Position	1		DAPI-	8378
88860.6	39993	3.45578	µm	Spot	Position	1		DAPI-	8379
88865.1	39993.3	3.52064	µm	Spot	Position	1		DAPI-	8380
88868.3	39994	3.57795	µm	Spot	Position	1		DAPI-	8381
88862.9	39994.4	3.49958	µm	Spot	Position	1		DAPI-	8382
88867.5	39994.3	3.56366	µm	Spot	Position	1		DAPI-	8383
88864.4	39994.5	3.51451	µm	Spot	Position	1		DAPI-	8384
88861.8	39995	3.46598	µm	Spot	Position	1		DAPI-	8385
88862.6	39995.1	3.50281	µm	Spot	Position	1		DAPI-	8386
88865.5	39995.1	3.53938	µm	Spot	Position	1		DAPI-	8387
88861.2	39995.7	3.46996	µm	Spot	Position	1		DAPI-	8388
88866.3	39995.6	3.54271	µm	Spot	Position	1		DAPI-	8389
88865.4	39996.1	3.5281	µm	Spot	Position	1		DAPI-	8390
88863	39996.3	3.50014	µm	Spot	Position	1		DAPI-	8391
88866.7	39996.5	3.55821	µm	Spot	Position	1		DAPI-	8392
88868	39996.5	3.58571	µm	Spot	Position	1		DAPI-	8393
88864.4	39997.4	3.52701	µm	Spot	Position	1		DAPI-	8394
88862.5	39997.6	3.49284	µm	Spot	Position	1		DAPI-	8395
88867.6	39997.7	3.58233	µm	Spot	Position	1		DAPI-	8396
88861.2	39997.9	3.47053	µm	Spot	Position	1		DAPI-	8397
88864	39998.2	3.53166	µm	Spot	Position	1		DAPI-	8398
88866.3	39998.3	3.5633	µm	Spot	Position	1		DAPI-	8399
88865	39998.5	3.53279	µm	Spot	Position	1		DAPI-	8400
88862.8	39998.6	3.50432	µm	Spot	Position	1		DAPI-	8401
88867.1	39998.8	3.57932	µm	Spot	Position	1		DAPI-	8402
88861.7	39998.8	3.46395	µm	Spot	Position	1		DAPI-	8403
88860.1	39999.3	3.45699	µm	Spot	Position	1		DAPI-	8404
88864.3	39999.5	3.53275	µm	Spot	Position	1		DAPI-	8405
88867.1	39999.6	3.5891	µm	Spot	Position	1		DAPI-	8406
88862.5	39999.9	3.49677	µm	Spot	Position	1		DAPI-	8407
88860.2	40000.2	3.46425	µm	Spot	Position	1		DAPI-	8408
88864.9	40000.5	3.5353	µm	Spot	Position	1		DAPI-	8409
88867.4	40000.7	3.5907	µm	Spot	Position	1		DAPI-	8410
88865.9	40001.1	3.56973	µm	Spot	Position	1		DAPI-	8411
88862.3	40001.2	3.49899	µm	Spot	Position	1		DAPI-	8412
88866.7	40001.2	3.58141	µm	Spot	Position	1		DAPI-	8413
88863.8	40001.4	3.52398	µm	Spot	Position	1		DAPI-	8414
88860.6	40001.7	3.48225	µm	Spot	Position	1		DAPI-	8415
88863.1	40002	3.51614	µm	Spot	Position	1		DAPI-	8416
88862.1	40002.9	3.50391	µm	Spot	Position	1		DAPI-	8417
88864.5	40002.8	3.54536	µm	Spot	Position	1		DAPI-	8418
88866.9	40002.8	3.59495	µm	Spot	Position	1		DAPI-	8419
88863.7	40003	3.53872	µm	Spot	Position	1		DAPI-	8420
88860.6	40003.2	3.49175	µm	Spot	Position	1		DAPI-	8421
88864.3	40003.8	3.54328	µm	Spot	Position	1		DAPI-	8422
88861.4	40004.1	3.49746	µm	Spot	Position	1		DAPI-	8423
88865.1	40004.3	3.55825	µm	Spot	Position	1		DAPI-	8424
88862.2	40004.5	3.51414	µm	Spot	Position	1		DAPI-	8425
88861.2	40005.2	3.4995	µm	Spot	Position	1		DAPI-	8426
88865.5	40005.3	3.58119	µm	Spot	Position	1		DAPI-	8427
88862.5	40005.5	3.52258	µm	Spot	Position	1		DAPI-	8428
88864.2	40005.6	3.55822	µm	Spot	Position	1		DAPI-	8429
88861.6	40006.3	3.51334	µm	Spot	Position	1		DAPI-	8430
88863	40006.3	3.54552	µm	Spot	Position	1		DAPI-	8431
88860.5	40006.5	3.50017	µm	Spot	Position	1		DAPI-	8432
88863.8	40007.1	3.56808	µm	Spot	Position	1		DAPI-	8433
88863	40007.3	3.5317	µm	Spot	Position	1		DAPI-	8434
88864.8	40007.5	3.57203	µm	Spot	Position	1		DAPI-	8435
88862.4	40007.9	3.52076	µm	Spot	Position	1		DAPI-	8436
88860.6	40008.3	3.51084	µm	Spot	Position	1		DAPI-	8437
88863.1	40008.6	3.55364	µm	Spot	Position	1		DAPI-	8438
88864.3	40008.7	3.56543	µm	Spot	Position	1		DAPI-	8439
88860.7	40009.1	3.5214	µm	Spot	Position	1		DAPI-	8440
88864.5	40009.8	3.57555	µm	Spot	Position	1		DAPI-	8441
88860.9	40010.2	3.51138	µm	Spot	Position	1		DAPI-	8442
88862	40010.1	3.53065	µm	Spot	Position	1		DAPI-	8443
88833.9	40011.7	2.90439	µm	Spot	Position	1		DAPI-	8531
88835.6	40011.9	2.93653	µm	Spot	Position	1		DAPI-	8532
88837.6	40012.2	2.97234	µm	Spot	Position	1		DAPI-	8533
88837.6	40013.1	2.9733	µm	Spot	Position	1		DAPI-	8534
88835.2	40013.6	2.93548	µm	Spot	Position	1		DAPI-	8535
88833.8	40013.8	2.90878	µm	Spot	Position	1		DAPI-	8536
88838	40014.3	2.9777	µm	Spot	Position	1		DAPI-	8537
88836.8	40014.6	2.97833	µm	Spot	Position	1		DAPI-	8538
88834.1	40014.9	2.9104	µm	Spot	Position	1		DAPI-	8539
88835.9	40014.9	2.94665	µm	Spot	Position	1		DAPI-	8540
88836.5	40016.2	2.9596	µm	Spot	Position	1		DAPI-	8541
88833.9	40016.3	2.89763	µm	Spot	Position	1		DAPI-	8542
88835.3	40017	2.94198	µm	Spot	Position	1		DAPI-	8543
88837.2	40017.5	2.99488	µm	Spot	Position	1		DAPI-	8544
88836.2	40017.6	2.95923	µm	Spot	Position	1		DAPI-	8545
88834	40018	2.91483	µm	Spot	Position	1		DAPI-	8546
88836	40018.4	2.95561	µm	Spot	Position	1		DAPI-	8547
88829.4	40018.6	2.80645	µm	Spot	Position	1		DAPI-	8548
88831.8	40019.1	2.85887	µm	Spot	Position	1		DAPI-	8549
88830.5	40019.2	2.84931	µm	Spot	Position	1		DAPI-	8550
88834	40019.4	2.91229	µm	Spot	Position	1		DAPI-	8551
88836	40019.8	2.96163	µm	Spot	Position	1		DAPI-	8552
88837.5	40020.6	2.9998	µm	Spot	Position	1		DAPI-	8553
88833.7	40020.7	2.90176	µm	Spot	Position	1		DAPI-	8554
88830	40021.1	2.8199	µm	Spot	Position	1		DAPI-	8555
88835.7	40021.2	2.93301	µm	Spot	Position	1		DAPI-	8556
88833.9	40021.5	2.92205	µm	Spot	Position	1		DAPI-	8557
88834.7	40021.4	2.93276	µm	Spot	Position	1		DAPI-	8558
88837.2	40021.9	2.98962	µm	Spot	Position	1		DAPI-	8559
88831.7	40022.4	2.87968	µm	Spot	Position	1		DAPI-	8560
88834	40022.9	2.90861	µm	Spot	Position	1		DAPI-	8561
88835.4	40022.9	2.95157	µm	Spot	Position	1		DAPI-	8562
88830.4	40023.2	2.8472	µm	Spot	Position	1		DAPI-	8563
88836.4	40023.2	2.98089	µm	Spot	Position	1		DAPI-	8564
88831.9	40023.7	2.87006	µm	Spot	Position	1		DAPI-	8565
88834	40023.9	2.92707	µm	Spot	Position	1		DAPI-	8566
88835.2	40024.2	2.94605	µm	Spot	Position	1		DAPI-	8567
88846.8	40011.6	3.20611	µm	Spot	Position	1		DAPI-	8675
88845.5	40012.1	3.19159	µm	Spot	Position	1		DAPI-	8676
88847.9	40012.1	3.22249	µm	Spot	Position	1		DAPI-	8677
88843.7	40012.2	3.16683	µm	Spot	Position	1		DAPI-	8678
88839.7	40012.3	3.04799	µm	Spot	Position	1		DAPI-	8679
88850.3	40012.4	3.26739	µm	Spot	Position	1		DAPI-	8680
88842.6	40013	3.14464	µm	Spot	Position	1		DAPI-	8681
88840.5	40013.1	3.1041	µm	Spot	Position	1		DAPI-	8682
88846.1	40013.3	3.20948	µm	Spot	Position	1		DAPI-	8683
88850.2	40013.4	3.27681	µm	Spot	Position	1		DAPI-	8684
88846.8	40013.9	3.22272	µm	Spot	Position	1		DAPI-	8685
88848	40013.8	3.23574	µm	Spot	Position	1		DAPI-	8686
88839.7	40014	3.08305	µm	Spot	Position	1		DAPI-	8687
88844.1	40014.2	3.17548	µm	Spot	Position	1		DAPI-	8688
88851	40014.4	3.29859	µm	Spot	Position	1		DAPI-	8689
88843	40014.6	3.14557	µm	Spot	Position	1		DAPI-	8690
88849	40014.6	3.25598	µm	Spot	Position	1		DAPI-	8691
88840.3	40014.7	3.08026	µm	Spot	Position	1		DAPI-	8692
88846.8	40014.8	3.19826	µm	Spot	Position	1		DAPI-	8693
88844.6	40015.1	3.17631	µm	Spot	Position	1		DAPI-	8694
88841.4	40015.3	3.12046	µm	Spot	Position	1		DAPI-	8695
88845.5	40015.4	3.19208	µm	Spot	Position	1		DAPI-	8696
88842.9	40015.6	3.14759	µm	Spot	Position	1		DAPI-	8697
88849.9	40015.7	3.26666	µm	Spot	Position	1		DAPI-	8698
88840.6	40015.8	3.07897	µm	Spot	Position	1		DAPI-	8699
88846.9	40015.8	3.21433	µm	Spot	Position	1		DAPI-	8700
88839.8	40016	3.06227	µm	Spot	Position	1		DAPI-	8701
88844.5	40016.1	3.1678	µm	Spot	Position	1		DAPI-	8702
88847.9	40016.5	3.22902	µm	Spot	Position	1		DAPI-	8703
88838.8	40016.6	3.0639	µm	Spot	Position	1		DAPI-	8704
88843.9	40016.7	3.17042	µm	Spot	Position	1		DAPI-	8705
88839.9	40017.1	3.06019	µm	Spot	Position	1		DAPI-	8706
88844.4	40017.3	3.17567	µm	Spot	Position	1		DAPI-	8707
88846.8	40017.2	3.21818	µm	Spot	Position	1		DAPI-	8708
88848.7	40017.3	3.25981	µm	Spot	Position	1		DAPI-	8709
88849.8	40017.3	3.26876	µm	Spot	Position	1		DAPI-	8710
88841.5	40017.8	3.11175	µm	Spot	Position	1		DAPI-	8711
88837.9	40018	3.0241	µm	Spot	Position	1		DAPI-	8713
88844.6	40018.1	3.17646	µm	Spot	Position	1		DAPI-	8714
88843.1	40018.5	3.14453	µm	Spot	Position	1		DAPI-	8716
88839.5	40018.9	3.0532	µm	Spot	Position	1		DAPI-	8717
88841.7	40019.1	3.1367	µm	Spot	Position	1		DAPI-	8720
88839.7	40019.7	3.07942	µm	Spot	Position	1		DAPI-	8722
88838.5	40019.8	3.05056	µm	Spot	Position	1		DAPI-	8724
88838.8	40020.7	3.05876	µm	Spot	Position	1		DAPI-	8730
88840.6	40021.1	3.10922	µm	Spot	Position	1		DAPI-	8732
88838.3	40021.3	3.02832	µm	Spot	Position	1		DAPI-	8735
88839.7	40021.9	3.06504	µm	Spot	Position	1		DAPI-	8738
88838.3	40022.1	3.04412	µm	Spot	Position	1		DAPI-	8742
88838.3	40023.4	3.03982	µm	Spot	Position	1		DAPI-	8748
88858.8	40011.9	3.48693	µm	Spot	Position	1		DAPI-	8913
88854.6	40012.3	3.39969	µm	Spot	Position	1		DAPI-	8914
88857.6	40012.2	3.46456	µm	Spot	Position	1		DAPI-	8915
88852.3	40013.4	3.33383	µm	Spot	Position	1		DAPI-	8916
88853.8	40013.5	3.38662	µm	Spot	Position	1		DAPI-	8917
88854.8	40013.5	3.39646	µm	Spot	Position	1		DAPI-	8918
88858.8	40013.5	3.49057	µm	Spot	Position	1		DAPI-	8919
88856.9	40013.8	3.45299	µm	Spot	Position	1		DAPI-	8920
88853.8	40014.5	3.37695	µm	Spot	Position	1		DAPI-	8921
88859.1	40014.6	3.50108	µm	Spot	Position	1		DAPI-	8922
88855.2	40014.7	3.42116	µm	Spot	Position	1		DAPI-	8923
88857.8	40014.9	3.46442	µm	Spot	Position	1		DAPI-	8924
88852.2	40015.4	3.32632	µm	Spot	Position	1		DAPI-	8925
88854.7	40015.5	3.3946	µm	Spot	Position	1		DAPI-	8926
88851.3	40016.1	3.34442	µm	Spot	Position	1		DAPI-	8927
88852.9	40016.1	3.38243	µm	Spot	Position	1		DAPI-	8928
88855.1	40016.2	3.40943	µm	Spot	Position	1		DAPI-	8929
88856.9	40016.2	3.46622	µm	Spot	Position	1		DAPI-	8930
88858.8	40016.5	3.50798	µm	Spot	Position	1		DAPI-	8931
88857.7	40016.8	3.47705	µm	Spot	Position	1		DAPI-	8932
88854.7	40017.1	3.40558	µm	Spot	Position	1		DAPI-	8933
88857.1	40017.7	3.46886	µm	Spot	Position	1		DAPI-	8935
88859.9	40018.1	3.51767	µm	Spot	Position	1		DAPI-	8938
88859.5	40018.8	3.51243	µm	Spot	Position	1		DAPI-	8940
88861.9	40011.6	3.53486	µm	Spot	Position	1		DAPI-	9130
88865.1	40011.7	3.59514	µm	Spot	Position	1		DAPI-	9131
88863	40011.9	3.56186	µm	Spot	Position	1		DAPI-	9132
88863.8	40012.2	3.59165	µm	Spot	Position	1		DAPI-	9133
88862	40012.9	3.54574	µm	Spot	Position	1		DAPI-	9134
88860.1	40013.1	3.50842	µm	Spot	Position	1		DAPI-	9135
88863.9	40013.4	3.58918	µm	Spot	Position	1		DAPI-	9136
88861.5	40014.3	3.53832	µm	Spot	Position	1		DAPI-	9137
88862.6	40015.1	3.54471	µm	Spot	Position	1		DAPI-	9138
88860.5	40015.5	3.52274	µm	Spot	Position	1		DAPI-	9139
88861.8	40015.5	3.5437	µm	Spot	Position	1		DAPI-	9140
88860.9	40016.4	3.53969	µm	Spot	Position	1		DAPI-	9141
88861.8	40016.5	3.55869	µm	Spot	Position	1		DAPI-	9142
88862.6	40017.3	3.58697	µm	Spot	Position	1		DAPI-	9143
88861.3	40018.4	3.55973	µm	Spot	Position	1		DAPI-	9144
88862.7	40018.5	3.57231	µm	Spot	Position	1		DAPI-	9145
88861.4	40019.9	3.56449	µm	Spot	Position	1		DAPI-	9146
88088.4	40281.9	2.91935	µm	Spot	Position	1		DAPI-	9862
88073	40344.2	3.17915	µm	Spot	Position	1		DAPI-	9890
88293.7	39971.8	3.68404	µm	Spot	Position	1		DAPI-	13857
88874.4	39986.4	3.71738	µm	Spot	Position	1		DAPI-	13994
88875.6	39987	3.7535	µm	Spot	Position	1		DAPI-	13996
88877.5	39987.1	3.75661	µm	Spot	Position	1		DAPI-	13997
88872.8	39987.3	3.68475	µm	Spot	Position	1		DAPI-	13998
88874.8	39987.3	3.71584	µm	Spot	Position	1		DAPI-	13999
88884.6	39987.7	3.88217	µm	Spot	Position	1		DAPI-	14001
88882.3	39987.9	3.84898	µm	Spot	Position	1		DAPI-	14002
88876.6	39988.2	3.75689	µm	Spot	Position	1		DAPI-	14003
88880.5	39988.4	3.823	µm	Spot	Position	1		DAPI-	14004
88878	39988.6	3.78073	µm	Spot	Position	1		DAPI-	14005
88884.7	39988.8	3.89004	µm	Spot	Position	1		DAPI-	14006
88871	39989.3	3.6535	µm	Spot	Position	1		DAPI-	14007
88873	39989.5	3.70278	µm	Spot	Position	1		DAPI-	14008
88875.6	39989.5	3.75194	µm	Spot	Position	1		DAPI-	14009
88880.4	39989.6	3.82187	µm	Spot	Position	1		DAPI-	14010
88882.5	39989.4	3.85471	µm	Spot	Position	1		DAPI-	14011
88879.5	39989.9	3.79821	µm	Spot	Position	1		DAPI-	14012
88872.2	39990.6	3.691	µm	Spot	Position	1		DAPI-	14013
88881.9	39990.7	3.84361	µm	Spot	Position	1		DAPI-	14014
88880.2	39990.8	3.82337	µm	Spot	Position	1		DAPI-	14015
88883.4	39990.9	3.87959	µm	Spot	Position	1		DAPI-	14016
88875.6	39991.1	3.75881	µm	Spot	Position	1		DAPI-	14017
88877.6	39991.3	3.7804	µm	Spot	Position	1		DAPI-	14018
88883	39991.7	3.88912	µm	Spot	Position	1		DAPI-	14019
88870.6	39991.9	3.64575	µm	Spot	Position	1		DAPI-	14020
88873.3	39992.3	3.71198	µm	Spot	Position	1		DAPI-	14021
88875.6	39992.3	3.75784	µm	Spot	Position	1		DAPI-	14022
88878	39992.5	3.79752	µm	Spot	Position	1		DAPI-	14023
88872.1	39993.4	3.69236	µm	Spot	Position	1		DAPI-	14024
88875.9	39993.4	3.76405	µm	Spot	Position	1		DAPI-	14025
88882.5	39993.7	3.87903	µm	Spot	Position	1		DAPI-	14026
88880.5	39993.8	3.84849	µm	Spot	Position	1		DAPI-	14027
88870.8	39993.9	3.67997	µm	Spot	Position	1		DAPI-	14028
88877.6	39994.1	3.80042	µm	Spot	Position	1		DAPI-	14029
88872.7	39994.6	3.70246	µm	Spot	Position	1		DAPI-	14030
88874.9	39994.5	3.74841	µm	Spot	Position	1		DAPI-	14031
88868.8	39995.3	3.62532	µm	Spot	Position	1		DAPI-	14032
88874.2	39995.3	3.73788	µm	Spot	Position	1		DAPI-	14033
88870.3	39995.5	3.67368	µm	Spot	Position	1		DAPI-	14034
88877.7	39995.4	3.80776	µm	Spot	Position	1		DAPI-	14035
88876.4	39995.6	3.7763	µm	Spot	Position	1		DAPI-	14036
88880.5	39995.7	3.8557	µm	Spot	Position	1		DAPI-	14037
88871.3	39996.1	3.69483	µm	Spot	Position	1		DAPI-	14038
88874.6	39996.2	3.76051	µm	Spot	Position	1		DAPI-	14039
88875.5	39996.1	3.76699	µm	Spot	Position	1		DAPI-	14040
88878.7	39996.3	3.82108	µm	Spot	Position	1		DAPI-	14041
88873.8	39996.5	3.74539	µm	Spot	Position	1		DAPI-	14042
88870.6	39996.7	3.67794	µm	Spot	Position	1		DAPI-	14043
88880	39996.6	3.83807	µm	Spot	Position	1		DAPI-	14044
88871.5	39996.9	3.7125	µm	Spot	Position	1		DAPI-	14045
88877.7	39996.9	3.79338	µm	Spot	Position	1		DAPI-	14046
88875.6	39997.1	3.7694	µm	Spot	Position	1		DAPI-	14047
88872.4	39997.2	3.72411	µm	Spot	Position	1		DAPI-	14048
88880.6	39997.3	3.86559	µm	Spot	Position	1		DAPI-	14049
88869.6	39997.7	3.65304	µm	Spot	Position	1		DAPI-	14050
88870.4	39998	3.67164	µm	Spot	Position	1		DAPI-	14051
88877.9	39997.9	3.81058	µm	Spot	Position	1		DAPI-	14052
88881.2	39998	3.87925	µm	Spot	Position	1		DAPI-	14053
88875	39998.3	3.75242	µm	Spot	Position	1		DAPI-	14054
88880.4	39998.6	3.86811	µm	Spot	Position	1		DAPI-	14055
88871.2	39998.8	3.70987	µm	Spot	Position	1		DAPI-	14056
88873.7	39998.8	3.74638	µm	Spot	Position	1		DAPI-	14057
88872.5	39999.3	3.72754	µm	Spot	Position	1		DAPI-	14058
88868.9	39999.4	3.64022	µm	Spot	Position	1		DAPI-	14059
88875.1	39999.4	3.78132	µm	Spot	Position	1		DAPI-	14060
88877.1	39999.4	3.80913	µm	Spot	Position	1		DAPI-	14061
88880.3	39999.4	3.86071	µm	Spot	Position	1		DAPI-	14062
88870.8	39999.9	3.70421	µm	Spot	Position	1		DAPI-	14063
88878.1	40000.3	3.83381	µm	Spot	Position	1		DAPI-	14064
88872.4	40001	3.74418	µm	Spot	Position	1		DAPI-	14065
88875.1	40001.2	3.78616	µm	Spot	Position	1		DAPI-	14066
88879.9	40001.3	3.87038	µm	Spot	Position	1		DAPI-	14067
88869.1	40001.7	3.66093	µm	Spot	Position	1		DAPI-	14068
88876.8	40001.9	3.80424	µm	Spot	Position	1		DAPI-	14069
88875.3	40002.1	3.78976	µm	Spot	Position	1		DAPI-	14070
88870.4	40002.3	3.6953	µm	Spot	Position	1		DAPI-	14071
88872.1	40002.3	3.73126	µm	Spot	Position	1		DAPI-	14072
88873.8	40002.3	3.75055	µm	Spot	Position	1		DAPI-	14073
88877.7	40002.2	3.83063	µm	Spot	Position	1		DAPI-	14074
88880.2	40002.5	3.89088	µm	Spot	Position	1		DAPI-	14075
88868.3	40002.6	3.65397	µm	Spot	Position	1		DAPI-	14076
88872.7	40003.4	3.76042	µm	Spot	Position	1		DAPI-	14077
88876.8	40003.8	3.82019	µm	Spot	Position	1		DAPI-	14078
88874.6	40004.1	3.77757	µm	Spot	Position	1		DAPI-	14079
88870.6	40004.2	3.72572	µm	Spot	Position	1		DAPI-	14080
88871.5	40004.6	3.73711	µm	Spot	Position	1		DAPI-	14081
88875.6	40004.6	3.81319	µm	Spot	Position	1		DAPI-	14082
88877	40004.7	3.83125	µm	Spot	Position	1		DAPI-	14083
88879	40004.6	3.88081	µm	Spot	Position	1		DAPI-	14084
88869.2	40004.8	3.6838	µm	Spot	Position	1		DAPI-	14085
88870.3	40004.9	3.71311	µm	Spot	Position	1		DAPI-	14086
88873.9	40005	3.78326	µm	Spot	Position	1		DAPI-	14087
88868.4	40005.1	3.66914	µm	Spot	Position	1		DAPI-	14088
88866.9	40005.3	3.62253	µm	Spot	Position	1		DAPI-	14089
88877.5	40005.3	3.84274	µm	Spot	Position	1		DAPI-	14090
88872.6	40005.8	3.76173	µm	Spot	Position	1		DAPI-	14091
88867.5	40005.9	3.65398	µm	Spot	Position	1		DAPI-	14092
88874.4	40006.4	3.79367	µm	Spot	Position	1		DAPI-	14093
88869	40006.6	3.68808	µm	Spot	Position	1		DAPI-	14094
88872.6	40006.7	3.77269	µm	Spot	Position	1		DAPI-	14095
88875.7	40006.9	3.82645	µm	Spot	Position	1		DAPI-	14096
88877	40007	3.83832	µm	Spot	Position	1		DAPI-	14097
88873.4	40007.2	3.78501	µm	Spot	Position	1		DAPI-	14098
88866.9	40007.4	3.63398	µm	Spot	Position	1		DAPI-	14099
88870.6	40007.3	3.73688	µm	Spot	Position	1		DAPI-	14100
88875	40007.3	3.80839	µm	Spot	Position	1		DAPI-	14101
88878.9	40007.4	3.89811	µm	Spot	Position	1		DAPI-	14102
88866.1	40007.5	3.62157	µm	Spot	Position	1		DAPI-	14103
88867.8	40007.5	3.66946	µm	Spot	Position	1		DAPI-	14104
88872.4	40007.5	3.77016	µm	Spot	Position	1		DAPI-	14105
88866.8	40008.2	3.62636	µm	Spot	Position	1		DAPI-	14106
88875.2	40008.2	3.82449	µm	Spot	Position	1		DAPI-	14107
88879.1	40008.2	3.90011	µm	Spot	Position	1		DAPI-	14108
88868.6	40008.5	3.69671	µm	Spot	Position	1		DAPI-	14109
88871.3	40008.4	3.74913	µm	Spot	Position	1		DAPI-	14110
88873	40008.4	3.79302	µm	Spot	Position	1		DAPI-	14111
88870.5	40008.8	3.75184	µm	Spot	Position	1		DAPI-	14112
88875.1	40009.2	3.83032	µm	Spot	Position	1		DAPI-	14113
88877.9	40009.1	3.8899	µm	Spot	Position	1		DAPI-	14114
88867.9	40009.4	3.67932	µm	Spot	Position	1		DAPI-	14115
88871.3	40009.4	3.75692	µm	Spot	Position	1		DAPI-	14116
88866.5	40009.6	3.65329	µm	Spot	Position	1		DAPI-	14117
88872.1	40009.7	3.76316	µm	Spot	Position	1		DAPI-	14118
88870.3	40009.8	3.73112	µm	Spot	Position	1		DAPI-	14119
88873.5	40010	3.79973	µm	Spot	Position	1		DAPI-	14120
88877	40010.4	3.87456	µm	Spot	Position	1		DAPI-	14121
88866.9	40010.6	3.65462	µm	Spot	Position	1		DAPI-	14122
88867.9	40010.6	3.67668	µm	Spot	Position	1		DAPI-	14123
88872.6	40011.2	3.79519	µm	Spot	Position	1		DAPI-	14124
88870.3	40011.3	3.74087	µm	Spot	Position	1		DAPI-	14125
88875.3	40011.4	3.85903	µm	Spot	Position	1		DAPI-	14126
88866.7	40011.5	3.65525	µm	Spot	Position	1		DAPI-	14127
88886.3	39987.4	3.94706	µm	Spot	Position	1		DAPI-	14246
88888.8	39987.7	4.00965	µm	Spot	Position	1		DAPI-	14249
88887.6	39988.3	3.99023	µm	Spot	Position	1		DAPI-	14251
88890.1	39988.4	4.03763	µm	Spot	Position	1		DAPI-	14252
88885.6	39988.9	3.94378	µm	Spot	Position	1		DAPI-	14253
88896.1	39988.9	4.14514	µm	Spot	Position	1		DAPI-	14254
88894.4	39989.2	4.11918	µm	Spot	Position	1		DAPI-	14255
88888.8	39989.6	4.01196	µm	Spot	Position	1		DAPI-	14256
88898.4	39989.6	4.19465	µm	Spot	Position	1		DAPI-	14257
88887.9	39989.8	4.004	µm	Spot	Position	1		DAPI-	14258
88889.9	39989.8	4.03463	µm	Spot	Position	1		DAPI-	14259
88891.7	39990.1	4.06969	µm	Spot	Position	1		DAPI-	14260
88885.9	39990.2	3.96054	µm	Spot	Position	1		DAPI-	14261
88893.5	39990.3	4.10366	µm	Spot	Position	1		DAPI-	14262
88897.1	39990.4	4.17866	µm	Spot	Position	1		DAPI-	14263
88885.3	39990.6	3.95206	µm	Spot	Position	1		DAPI-	14264
88890.1	39991.1	4.04823	µm	Spot	Position	1		DAPI-	14265
88891.2	39991.1	4.06538	µm	Spot	Position	1		DAPI-	14266
88894.9	39991.3	4.12802	µm	Spot	Position	1		DAPI-	14267
88886.7	39991.5	3.96527	µm	Spot	Position	1		DAPI-	14268
88892.2	39991.4	4.08437	µm	Spot	Position	1		DAPI-	14269
88888.3	39991.6	4.01615	µm	Spot	Position	1		DAPI-	14270
88894	39992	4.12059	µm	Spot	Position	1		DAPI-	14271
88890.3	39992.2	4.05489	µm	Spot	Position	1		DAPI-	14272
88896.8	39992.5	4.17298	µm	Spot	Position	1		DAPI-	14273
88887.9	39992.9	4.01864	µm	Spot	Position	1		DAPI-	14274
88885.4	39993.1	3.96803	µm	Spot	Position	1		DAPI-	14275
88894.3	39993.1	4.12594	µm	Spot	Position	1		DAPI-	14276
88895.3	39993.2	4.13663	µm	Spot	Position	1		DAPI-	14277
88896.1	39993.4	4.16753	µm	Spot	Position	1		DAPI-	14278
88894.3	39994	4.13201	µm	Spot	Position	1		DAPI-	14279
88887.9	39994.2	4.02487	µm	Spot	Position	1		DAPI-	14280
88892.8	39994.1	4.10124	µm	Spot	Position	1		DAPI-	14281
88885.4	39994.6	3.96015	µm	Spot	Position	1		DAPI-	14282
88891.5	39994.6	4.09117	µm	Spot	Position	1		DAPI-	14283
88888.7	39994.7	4.03355	µm	Spot	Position	1		DAPI-	14284
88889.8	39995.1	4.05864	µm	Spot	Position	1		DAPI-	14285
88896.6	39995.1	4.18049	µm	Spot	Position	1		DAPI-	14286
88894.2	39995.5	4.13836	µm	Spot	Position	1		DAPI-	14287
88892.3	39995.6	4.11257	µm	Spot	Position	1		DAPI-	14288
88883.3	39995.8	3.93421	µm	Spot	Position	1		DAPI-	14289
88895.6	39995.8	4.17019	µm	Spot	Position	1		DAPI-	14290
88885.5	39996.2	3.98618	µm	Spot	Position	1		DAPI-	14291
88887.9	39996.1	4.03772	µm	Spot	Position	1		DAPI-	14292
88891.3	39996.4	4.09455	µm	Spot	Position	1		DAPI-	14293
88896.9	39996.3	4.1977	µm	Spot	Position	1		DAPI-	14294
88892.3	39996.9	4.11221	µm	Spot	Position	1		DAPI-	14295
88896	39996.8	4.19998	µm	Spot	Position	1		DAPI-	14296
88883.4	39997	3.94612	µm	Spot	Position	1		DAPI-	14297
88886.9	39997.3	4.0088	µm	Spot	Position	1		DAPI-	14298
88888	39997.2	4.03779	µm	Spot	Position	1		DAPI-	14299
88889.2	39997.3	4.05804	µm	Spot	Position	1		DAPI-	14300
88893.7	39997.5	4.13782	µm	Spot	Position	1		DAPI-	14301
88882.3	39998.2	3.91662	µm	Spot	Position	1		DAPI-	14302
88885.7	39998.2	4.01004	µm	Spot	Position	1		DAPI-	14303
88890.9	39998.1	4.10068	µm	Spot	Position	1		DAPI-	14304
88894.4	39998.1	4.14663	µm	Spot	Position	1		DAPI-	14305
88891.7	39998.3	4.1154	µm	Spot	Position	1		DAPI-	14306
88892.9	39998.5	4.13222	µm	Spot	Position	1		DAPI-	14307
88886.8	39998.6	4.01717	µm	Spot	Position	1		DAPI-	14308
88887.6	39999	4.04305	µm	Spot	Position	1		DAPI-	14309
88892.2	39999.3	4.1283	µm	Spot	Position	1		DAPI-	14310
88883.1	39999.5	3.94713	µm	Spot	Position	1		DAPI-	14311
88884.7	39999.3	3.97332	µm	Spot	Position	1		DAPI-	14312
88895.1	39999.4	4.17298	µm	Spot	Position	1		DAPI-	14313
88888.9	39999.6	4.06151	µm	Spot	Position	1		DAPI-	14314
88893.5	39999.7	4.14872	µm	Spot	Position	1		DAPI-	14315
88894.4	39999.5	4.17071	µm	Spot	Position	1		DAPI-	14316
88889.9	40000.3	4.08533	µm	Spot	Position	1		DAPI-	14317
88891.7	40000.3	4.11306	µm	Spot	Position	1		DAPI-	14318
88892.9	40000.5	4.14424	µm	Spot	Position	1		DAPI-	14319
88894.4	40000.6	4.1799	µm	Spot	Position	1		DAPI-	14320
88886.8	40001	4.03168	µm	Spot	Position	1		DAPI-	14321
88888.9	40000.9	4.07636	µm	Spot	Position	1		DAPI-	14322
88883.4	40001.1	3.98	µm	Spot	Position	1		DAPI-	14323
88885.6	40001.4	4.02282	µm	Spot	Position	1		DAPI-	14324
88882.4	40002.1	3.94406	µm	Spot	Position	1		DAPI-	14325
88888	40002.1	4.07183	µm	Spot	Position	1		DAPI-	14326
88883.6	40002.2	3.97149	µm	Spot	Position	1		DAPI-	14327
88889.9	40002.2	4.10051	µm	Spot	Position	1		DAPI-	14328
88892.7	40002.8	4.14785	µm	Spot	Position	1		DAPI-	14329
88894.3	40002.9	4.18276	µm	Spot	Position	1		DAPI-	14330
88886.5	40003	4.04212	µm	Spot	Position	1		DAPI-	14331
88889.2	40003.1	4.08335	µm	Spot	Position	1		DAPI-	14332
88885	40003.5	4.01271	µm	Spot	Position	1		DAPI-	14333
88888.6	40003.5	4.08954	µm	Spot	Position	1		DAPI-	14334
88883.4	40003.9	3.99099	µm	Spot	Position	1		DAPI-	14335
88890.9	40004.3	4.1315	µm	Spot	Position	1		DAPI-	14336
88888.8	40004.4	4.10534	µm	Spot	Position	1		DAPI-	14337
88883.2	40005	3.99812	µm	Spot	Position	1		DAPI-	14338
88880.6	40005.2	3.94965	µm	Spot	Position	1		DAPI-	14339
88886.2	40005.2	4.06406	µm	Spot	Position	1		DAPI-	14340
88889.1	40005.3	4.11146	µm	Spot	Position	1		DAPI-	14341
88892.7	40005.4	4.16833	µm	Spot	Position	1		DAPI-	14342
88882.5	40005.5	3.97763	µm	Spot	Position	1		DAPI-	14343
88885.1	40005.7	4.03894	µm	Spot	Position	1		DAPI-	14344
88887.4	40005.7	4.08154	µm	Spot	Position	1		DAPI-	14345
88891.3	40005.7	4.14406	µm	Spot	Position	1		DAPI-	14346
88883.6	40005.9	4.00397	µm	Spot	Position	1		DAPI-	14347
88888.7	40006.3	4.10858	µm	Spot	Position	1		DAPI-	14348
88886.7	40006.5	4.07324	µm	Spot	Position	1		DAPI-	14349
88880.6	40006.6	3.94726	µm	Spot	Position	1		DAPI-	14350
88884	40007.2	4.01966	µm	Spot	Position	1		DAPI-	14351
88891.9	40007.3	4.16923	µm	Spot	Position	1		DAPI-	14352
88883.1	40007.5	4.01216	µm	Spot	Position	1		DAPI-	14353
88885.4	40007.4	4.06847	µm	Spot	Position	1		DAPI-	14354
88880.7	40007.8	3.96187	µm	Spot	Position	1		DAPI-	14355
88887.8	40008	4.09963	µm	Spot	Position	1		DAPI-	14356
88887	40008.3	4.07962	µm	Spot	Position	1		DAPI-	14357
88892.3	40008.2	4.18243	µm	Spot	Position	1		DAPI-	14358
88886.1	40008.5	4.07683	µm	Spot	Position	1		DAPI-	14359
88889.3	40008.4	4.12731	µm	Spot	Position	1		DAPI-	14360
88882.3	40008.7	3.99519	µm	Spot	Position	1		DAPI-	14361
88883	40008.9	4.02343	µm	Spot	Position	1		DAPI-	14362
88891.4	40008.9	4.17279	µm	Spot	Position	1		DAPI-	14363
88880.6	40009.4	3.97965	µm	Spot	Position	1		DAPI-	14364
88885.1	40009.3	4.04842	µm	Spot	Position	1		DAPI-	14365
88887.2	40009.2	4.09324	µm	Spot	Position	1		DAPI-	14366
88885.7	40010.1	4.08429	µm	Spot	Position	1		DAPI-	14367
88878.5	40010.3	3.93053	µm	Spot	Position	1		DAPI-	14368
88887.2	40010.2	4.09191	µm	Spot	Position	1		DAPI-	14369
88888	40010.2	4.11605	µm	Spot	Position	1		DAPI-	14370
88891.8	40010.3	4.19255	µm	Spot	Position	1		DAPI-	14371
88889.1	40010.4	4.1289	µm	Spot	Position	1		DAPI-	14372
88882.3	40010.6	4.01768	µm	Spot	Position	1		DAPI-	14373
88883.8	40010.7	4.04761	µm	Spot	Position	1		DAPI-	14374
88889.8	40010.6	4.15865	µm	Spot	Position	1		DAPI-	14375
88880.2	40011.1	3.96572	µm	Spot	Position	1		DAPI-	14376
88884.9	40011.2	4.06415	µm	Spot	Position	1		DAPI-	14377
88887.5	40011.3	4.11552	µm	Spot	Position	1		DAPI-	14378
88905.1	39983.3	4.34893	µm	Spot	Position	1		DAPI-	14423
88904.4	39984.8	4.33898	µm	Spot	Position	1		DAPI-	14424
88903.5	39985.3	4.32676	µm	Spot	Position	1		DAPI-	14426
88905.6	39985.6	4.36518	µm	Spot	Position	1		DAPI-	14427
88901.1	39986.6	4.27949	µm	Spot	Position	1		DAPI-	14429
88903.6	39986.6	4.33787	µm	Spot	Position	1		DAPI-	14430
88902.5	39986.8	4.31086	µm	Spot	Position	1		DAPI-	14431
88905.2	39987	4.36422	µm	Spot	Position	1		DAPI-	14432
88899.1	39987.1	4.21321	µm	Spot	Position	1		DAPI-	14433
88902.8	39988.1	4.30876	µm	Spot	Position	1		DAPI-	14434
88905.3	39988.1	4.3646	µm	Spot	Position	1		DAPI-	14435
88899.2	39988.6	4.22114	µm	Spot	Position	1		DAPI-	14436
88901.1	39988.9	4.28771	µm	Spot	Position	1		DAPI-	14437
88904	39989.1	4.34764	µm	Spot	Position	1		DAPI-	14438
88902.7	39989.5	4.33277	µm	Spot	Position	1		DAPI-	14439
88899.7	39989.7	4.23901	µm	Spot	Position	1		DAPI-	14440
88905	39989.9	4.36289	µm	Spot	Position	1		DAPI-	14441
88901.5	39990.3	4.29724	µm	Spot	Position	1		DAPI-	14442
88899.6	39990.7	4.25737	µm	Spot	Position	1		DAPI-	14443
88900.8	39991	4.29156	µm	Spot	Position	1		DAPI-	14444
88905.9	39991.5	4.38973	µm	Spot	Position	1		DAPI-	14445
88903.4	39991.6	4.34725	µm	Spot	Position	1		DAPI-	14446
88904.8	39992.2	4.3735	µm	Spot	Position	1		DAPI-	14447
88899.4	39992.3	4.26323	µm	Spot	Position	1		DAPI-	14448
88901.6	39992.9	4.31567	µm	Spot	Position	1		DAPI-	14449
88903.4	39993.2	4.35671	µm	Spot	Position	1		DAPI-	14450
88904.7	39993.5	4.36926	µm	Spot	Position	1		DAPI-	14451
88900.9	39993.7	4.3184	µm	Spot	Position	1		DAPI-	14452
88905.6	39994	4.38763	µm	Spot	Position	1		DAPI-	14453
88899.3	39994.2	4.25938	µm	Spot	Position	1		DAPI-	14454
88904.8	39994.6	4.36809	µm	Spot	Position	1		DAPI-	14455
88901.5	39994.8	4.31967	µm	Spot	Position	1		DAPI-	14456
88899.3	39995	4.26831	µm	Spot	Position	1		DAPI-	14457
88903.7	39995	4.36799	µm	Spot	Position	1		DAPI-	14458
88904.7	39995.4	4.37623	µm	Spot	Position	1		DAPI-	14459
88901.5	39996.5	4.32543	µm	Spot	Position	1		DAPI-	14460
88903.9	39996.6	4.37113	µm	Spot	Position	1		DAPI-	14461
88905.1	39996.7	4.38939	µm	Spot	Position	1		DAPI-	14462
88896.9	39997.1	4.21761	µm	Spot	Position	1		DAPI-	14463
88899.7	39997.1	4.30547	µm	Spot	Position	1		DAPI-	14464
88903.5	39997.7	4.37188	µm	Spot	Position	1		DAPI-	14465
88906.2	39997.7	4.42089	µm	Spot	Position	1		DAPI-	14466
88901	39998	4.32417	µm	Spot	Position	1		DAPI-	14467
88897.3	39999	4.24991	µm	Spot	Position	1		DAPI-	14468
88902.9	39999.1	4.36676	µm	Spot	Position	1		DAPI-	14469
88896.3	39999.4	4.21647	µm	Spot	Position	1		DAPI-	14470
88899.1	39999.3	4.29977	µm	Spot	Position	1		DAPI-	14471
88904.3	39999.4	4.38471	µm	Spot	Position	1		DAPI-	14472
88901.5	39999.6	4.34046	µm	Spot	Position	1		DAPI-	14473
88902.8	40000.2	4.36966	µm	Spot	Position	1		DAPI-	14474
88904.4	40000.4	4.39175	µm	Spot	Position	1		DAPI-	14475
88905.3	40000.5	4.41535	µm	Spot	Position	1		DAPI-	14476
88897.2	40000.6	4.27265	µm	Spot	Position	1		DAPI-	14477
88899.3	40001.1	4.30577	µm	Spot	Position	1		DAPI-	14478
88900.9	40001.1	4.34437	µm	Spot	Position	1		DAPI-	14479
88904.5	40001.2	4.39338	µm	Spot	Position	1		DAPI-	14480
88903.5	40001.5	4.38033	µm	Spot	Position	1		DAPI-	14481
88904.4	40002.2	4.40065	µm	Spot	Position	1		DAPI-	14482
88897.8	40002.2	4.28354	µm	Spot	Position	1		DAPI-	14483
88901.6	40002.3	4.36578	µm	Spot	Position	1		DAPI-	14484
88899.6	40002.6	4.32653	µm	Spot	Position	1		DAPI-	14485
88902.7	40002.6	4.37988	µm	Spot	Position	1		DAPI-	14486
88897.1	40003.1	4.27825	µm	Spot	Position	1		DAPI-	14487
88904.8	40003.2	4.41096	µm	Spot	Position	1		DAPI-	14488
88898.6	40003.5	4.31537	µm	Spot	Position	1		DAPI-	14489
88901.4	40003.6	4.37007	µm	Spot	Position	1		DAPI-	14490
88903.7	40003.6	4.40117	µm	Spot	Position	1		DAPI-	14491
88896.9	40004.1	4.27284	µm	Spot	Position	1		DAPI-	14492
88898	40004.3	4.31333	µm	Spot	Position	1		DAPI-	14493
88901.5	40004.6	4.37557	µm	Spot	Position	1		DAPI-	14494
88894.8	40005	4.23946	µm	Spot	Position	1		DAPI-	14495
88903.7	40005.3	4.41366	µm	Spot	Position	1		DAPI-	14496
88893.9	40005.5	4.21041	µm	Spot	Position	1		DAPI-	14497
88896.6	40005.7	4.2856	µm	Spot	Position	1		DAPI-	14498
88898.5	40005.7	4.32105	µm	Spot	Position	1		DAPI-	14499
88901.7	40005.7	4.37994	µm	Spot	Position	1		DAPI-	14500
88899.6	40005.9	4.34592	µm	Spot	Position	1		DAPI-	14501
88900.7	40005.9	4.37148	µm	Spot	Position	1		DAPI-	14502
88894.8	40006.2	4.23473	µm	Spot	Position	1		DAPI-	14503
88902.9	40006.6	4.40623	µm	Spot	Position	1		DAPI-	14504
88897.2	40006.8	4.2935	µm	Spot	Position	1		DAPI-	14505
88898.6	40007	4.34721	µm	Spot	Position	1		DAPI-	14506
88899.6	40007	4.34902	µm	Spot	Position	1		DAPI-	14507
88895.7	40007.4	4.27722	µm	Spot	Position	1		DAPI-	14508
88904.6	40007.3	4.4255	µm	Spot	Position	1		DAPI-	14509
88901.5	40007.6	4.38193	µm	Spot	Position	1		DAPI-	14510
88896.9	40007.8	4.29795	µm	Spot	Position	1		DAPI-	14511
88894.2	40008.1	4.24157	µm	Spot	Position	1		DAPI-	14512
88895.2	40008.4	4.28267	µm	Spot	Position	1		DAPI-	14513
88897.8	40008.4	4.33844	µm	Spot	Position	1		DAPI-	14514
88905.4	40008.7	4.44883	µm	Spot	Position	1		DAPI-	14515
88903.3	40009.4	4.42095	µm	Spot	Position	1		DAPI-	14516
88904.1	40009.3	4.43944	µm	Spot	Position	1		DAPI-	14517
88896.5	40009.5	4.29468	µm	Spot	Position	1		DAPI-	14518
88901.6	40009.5	4.38529	µm	Spot	Position	1		DAPI-	14519
88898.5	40009.6	4.35086	µm	Spot	Position	1		DAPI-	14520
88899.5	40009.7	4.36069	µm	Spot	Position	1		DAPI-	14521
88893.7	40010.4	4.23065	µm	Spot	Position	1		DAPI-	14522
88894.6	40010.5	4.26448	µm	Spot	Position	1		DAPI-	14523
88896	40010.6	4.31426	µm	Spot	Position	1		DAPI-	14524
88904.6	40010.5	4.44543	µm	Spot	Position	1		DAPI-	14525
88906.2	40010.7	4.48943	µm	Spot	Position	1		DAPI-	14526
88897	40011	4.32111	µm	Spot	Position	1		DAPI-	14527
88899.6	40011.1	4.3738	µm	Spot	Position	1		DAPI-	14528
88901	40011.4	4.40643	µm	Spot	Position	1		DAPI-	14529
88892.2	40011.5	4.2172	µm	Spot	Position	1		DAPI-	14530
88893	40011.4	4.2474	µm	Spot	Position	1		DAPI-	14531
88902.7	40011.4	4.42746	µm	Spot	Position	1		DAPI-	14532
88904.4	40011.5	4.45273	µm	Spot	Position	1		DAPI-	14533
88908.4	39983.8	4.40711	µm	Spot	Position	1		DAPI-	14591
88909.7	39984	4.41257	µm	Spot	Position	1		DAPI-	14592
88907.8	39984.2	4.39242	µm	Spot	Position	1		DAPI-	14593
88912.2	39984.5	4.46265	µm	Spot	Position	1		DAPI-	14594
88907.2	39984.8	4.38474	µm	Spot	Position	1		DAPI-	14595
88910	39984.9	4.42202	µm	Spot	Position	1		DAPI-	14596
88908.8	39985.2	4.41651	µm	Spot	Position	1		DAPI-	14597
88912.1	39985.6	4.4643	µm	Spot	Position	1		DAPI-	14598
88911.3	39985.7	4.4498	µm	Spot	Position	1		DAPI-	14599
88910.3	39986.3	4.43091	µm	Spot	Position	1		DAPI-	14600
88912.1	39986.6	4.46356	µm	Spot	Position	1		DAPI-	14601
88907.7	39987	4.39836	µm	Spot	Position	1		DAPI-	14602
88906.6	39987.2	4.38489	µm	Spot	Position	1		DAPI-	14603
88908.8	39988	4.41572	µm	Spot	Position	1		DAPI-	14604
88906.9	39988.4	4.38656	µm	Spot	Position	1		DAPI-	14605
88912.3	39988.6	4.49586	µm	Spot	Position	1		DAPI-	14606
88908.7	39988.9	4.42052	µm	Spot	Position	1		DAPI-	14607
88910.2	39988.9	4.44032	µm	Spot	Position	1		DAPI-	14608
88908	39990.1	4.41394	µm	Spot	Position	1		DAPI-	14609
88910.9	39990.3	4.46976	µm	Spot	Position	1		DAPI-	14610
88911.8	39990.2	4.47694	µm	Spot	Position	1		DAPI-	14611
88907.4	39990.8	4.40024	µm	Spot	Position	1		DAPI-	14612
88909.8	39990.8	4.43736	µm	Spot	Position	1		DAPI-	14613
88910.3	39991.5	4.45224	µm	Spot	Position	1		DAPI-	14614
88908.3	39992	4.42137	µm	Spot	Position	1		DAPI-	14615
88910	39992.4	4.44573	µm	Spot	Position	1		DAPI-	14616
88912.3	39992.6	4.49048	µm	Spot	Position	1		DAPI-	14617
88907.4	39993.8	4.41992	µm	Spot	Position	1		DAPI-	14618
88908.7	39994.5	4.44184	µm	Spot	Position	1		DAPI-	14619
88909.7	39994.5	4.44831	µm	Spot	Position	1		DAPI-	14620
88911	39994.5	4.48626	µm	Spot	Position	1		DAPI-	14621
88908.8	39995.5	4.44106	µm	Spot	Position	1		DAPI-	14622
88906.7	39995.8	4.40613	µm	Spot	Position	1		DAPI-	14623
88909.5	39996	4.45418	µm	Spot	Position	1		DAPI-	14624
88906.4	39996.6	4.4131	µm	Spot	Position	1		DAPI-	14625
88911	39996.7	4.49167	µm	Spot	Position	1		DAPI-	14626
88908	39997.1	4.44014	µm	Spot	Position	1		DAPI-	14627
88909.8	39997.3	4.46639	µm	Spot	Position	1		DAPI-	14628
88906.7	39999.4	4.41834	µm	Spot	Position	1		DAPI-	14629
88909.4	39999.6	4.47324	µm	Spot	Position	1		DAPI-	14630
88907.1	40000.3	4.43205	µm	Spot	Position	1		DAPI-	14631
88910	40001.4	4.49135	µm	Spot	Position	1		DAPI-	14632
88906.7	40002.3	4.4407	µm	Spot	Position	1		DAPI-	14633
88907.4	40003	4.4427	µm	Spot	Position	1		DAPI-	14634
88909.7	40003.1	4.49882	µm	Spot	Position	1		DAPI-	14635
88909.8	40003.8	4.49242	µm	Spot	Position	1		DAPI-	14636
88907.3	40004.2	4.45917	µm	Spot	Position	1		DAPI-	14637
88908.8	40004.3	4.48567	µm	Spot	Position	1		DAPI-	14638
88908.8	40005.2	4.47973	µm	Spot	Position	1		DAPI-	14639
88907.2	40005.6	4.45505	µm	Spot	Position	1		DAPI-	14640
88907.3	40006.7	4.46975	µm	Spot	Position	1		DAPI-	14641
88906.5	40006.9	4.45722	µm	Spot	Position	1		DAPI-	14642
88907.4	40008.3	4.46964	µm	Spot	Position	1		DAPI-	14643
88906.6	40009.2	4.47313	µm	Spot	Position	1		DAPI-	14644
88907.4	40009.8	4.49107	µm	Spot	Position	1		DAPI-	14645
88907.3	40011.5	4.49497	µm	Spot	Position	1		DAPI-	14646
88915.3	39984.1	4.56444	µm	Spot	Position	1		DAPI-	14742
88917.3	39984.3	4.61365	µm	Spot	Position	1		DAPI-	14743
88922.5	39985.1	4.71326	µm	Spot	Position	1		DAPI-	14746
88925.5	39985.2	4.7658	µm	Spot	Position	1		DAPI-	14747
88915.9	39985.4	4.59215	µm	Spot	Position	1		DAPI-	14748
88915	39985.5	4.55697	µm	Spot	Position	1		DAPI-	14749
88917	39985.7	4.62016	µm	Spot	Position	1		DAPI-	14750
88920.2	39985.7	4.67336	µm	Spot	Position	1		DAPI-	14751
88922.5	39986.4	4.70706	µm	Spot	Position	1		DAPI-	14752
88925	39986.4	4.75328	µm	Spot	Position	1		DAPI-	14753
88926.7	39986.5	4.77702	µm	Spot	Position	1		DAPI-	14754
88915	39986.5	4.56443	µm	Spot	Position	1		DAPI-	14755
88917.5	39986.6	4.63452	µm	Spot	Position	1		DAPI-	14756
88913.5	39986.7	4.52471	µm	Spot	Position	1		DAPI-	14757
88919.8	39986.8	4.66448	µm	Spot	Position	1		DAPI-	14758
88915.9	39987.3	4.6077	µm	Spot	Position	1		DAPI-	14759
88923.6	39987.5	4.73364	µm	Spot	Position	1		DAPI-	14760
88925.6	39987.6	4.76327	µm	Spot	Position	1		DAPI-	14761
88926.6	39987.9	4.78393	µm	Spot	Position	1		DAPI-	14762
88921.3	39988.1	4.69598	µm	Spot	Position	1		DAPI-	14763
88917.7	39988.2	4.63644	µm	Spot	Position	1		DAPI-	14764
88922.7	39988.3	4.71527	µm	Spot	Position	1		DAPI-	14765
88913.1	39988.8	4.52024	µm	Spot	Position	1		DAPI-	14766
88919.9	39988.8	4.672	µm	Spot	Position	1		DAPI-	14767
88921.5	39988.9	4.69956	µm	Spot	Position	1		DAPI-	14768
88926.9	39988.9	4.79139	µm	Spot	Position	1		DAPI-	14769
88915	39989.3	4.58212	µm	Spot	Position	1		DAPI-	14770
88923.1	39989.3	4.72068	µm	Spot	Position	1		DAPI-	14771
88925.6	39989.5	4.77551	µm	Spot	Position	1		DAPI-	14772
88916.5	39989.6	4.63211	µm	Spot	Position	1		DAPI-	14773
88921.6	39990	4.70327	µm	Spot	Position	1		DAPI-	14774
88922.7	39990.3	4.70942	µm	Spot	Position	1		DAPI-	14775
88924.4	39990.4	4.73658	µm	Spot	Position	1		DAPI-	14776
88925.4	39990.7	4.76507	µm	Spot	Position	1		DAPI-	14777
88917.7	39990.7	4.63788	µm	Spot	Position	1		DAPI-	14778
88913.6	39990.9	4.55407	µm	Spot	Position	1		DAPI-	14779
88919.8	39991.4	4.6749	µm	Spot	Position	1		DAPI-	14780
88915.1	39991.6	4.59057	µm	Spot	Position	1		DAPI-	14781
88922.1	39991.6	4.69834	µm	Spot	Position	1		DAPI-	14782
88915.9	39991.8	4.62989	µm	Spot	Position	1		DAPI-	14783
88923.6	39991.8	4.72666	µm	Spot	Position	1		DAPI-	14784
88925.8	39991.8	4.77834	µm	Spot	Position	1		DAPI-	14785
88913.4	39992.2	4.53948	µm	Spot	Position	1		DAPI-	14786
88917.6	39992.1	4.64238	µm	Spot	Position	1		DAPI-	14787
88919.6	39992.1	4.66999	µm	Spot	Position	1		DAPI-	14788
88915	39992.8	4.58617	µm	Spot	Position	1		DAPI-	14789
88924.7	39992.7	4.7523	µm	Spot	Position	1		DAPI-	14790
88922.5	39992.9	4.71521	µm	Spot	Position	1		DAPI-	14791
88913.4	39993.3	4.54965	µm	Spot	Position	1		DAPI-	14792
88919.6	39993.5	4.66962	µm	Spot	Position	1		DAPI-	14793
88921.5	39993.6	4.71092	µm	Spot	Position	1		DAPI-	14794
88923.6	39993.7	4.73776	µm	Spot	Position	1		DAPI-	14795
88924.4	39993.7	4.75621	µm	Spot	Position	1		DAPI-	14796
88917.6	39994.2	4.64813	µm	Spot	Position	1		DAPI-	14797
88916	39994.4	4.63334	µm	Spot	Position	1		DAPI-	14798
88921.9	39994.3	4.71131	µm	Spot	Position	1		DAPI-	14799
88914.8	39994.6	4.5981	µm	Spot	Position	1		DAPI-	14800
88913.3	39994.8	4.56383	µm	Spot	Position	1		DAPI-	14801
88920.9	39994.8	4.71071	µm	Spot	Position	1		DAPI-	14802
88924.4	39995.1	4.75045	µm	Spot	Position	1		DAPI-	14803
88925.6	39995.1	4.78994	µm	Spot	Position	1		DAPI-	14804
88915.9	39995.4	4.63579	µm	Spot	Position	1		DAPI-	14805
88917.7	39995.3	4.65077	µm	Spot	Position	1		DAPI-	14806
88911.2	39995.6	4.51014	µm	Spot	Position	1		DAPI-	14807
88919.8	39995.8	4.68118	µm	Spot	Position	1		DAPI-	14808
88922.2	39995.8	4.71474	µm	Spot	Position	1		DAPI-	14809
88913.3	39996.2	4.56784	µm	Spot	Position	1		DAPI-	14810
88914.7	39996.2	4.59294	µm	Spot	Position	1		DAPI-	14811
88917.2	39996.3	4.65377	µm	Spot	Position	1		DAPI-	14812
88915.6	39996.7	4.62169	µm	Spot	Position	1		DAPI-	14813
88918.6	39996.6	4.67334	µm	Spot	Position	1		DAPI-	14814
88919.6	39997	4.68275	µm	Spot	Position	1		DAPI-	14815
88925.6	39997	4.80194	µm	Spot	Position	1		DAPI-	14816
88917.7	39997.2	4.66229	µm	Spot	Position	1		DAPI-	14817
88921.2	39997.3	4.71234	µm	Spot	Position	1		DAPI-	14818
88912.4	39997.9	4.54917	µm	Spot	Position	1		DAPI-	14819
88913.5	39997.9	4.58245	µm	Spot	Position	1		DAPI-	14820
88922	39997.8	4.7205	µm	Spot	Position	1		DAPI-	14821
88915.3	39997.9	4.61666	µm	Spot	Position	1		DAPI-	14822
88914.4	39998.1	4.59533	µm	Spot	Position	1		DAPI-	14823
88918.5	39998.3	4.67793	µm	Spot	Position	1		DAPI-	14824
88920.2	39998.4	4.69088	µm	Spot	Position	1		DAPI-	14825
88912	39998.9	4.53957	µm	Spot	Position	1		DAPI-	14826
88922	39998.8	4.71545	µm	Spot	Position	1		DAPI-	14827
88917.1	39999.2	4.65181	µm	Spot	Position	1		DAPI-	14828
88923.7	39999.3	4.78003	µm	Spot	Position	1		DAPI-	14829
88915.3	39999.3	4.62318	µm	Spot	Position	1		DAPI-	14830
88919.6	39999.6	4.68518	µm	Spot	Position	1		DAPI-	14831
88920.8	39999.6	4.72215	µm	Spot	Position	1		DAPI-	14832
88912.5	40000.2	4.55341	µm	Spot	Position	1		DAPI-	14833
88920.2	40000.2	4.70893	µm	Spot	Position	1		DAPI-	14834
88923.1	40000.6	4.75128	µm	Spot	Position	1		DAPI-	14835
88924.3	40000.8	4.77672	µm	Spot	Position	1		DAPI-	14836
88913.5	40001	4.59661	µm	Spot	Position	1		DAPI-	14837
88915.1	40001.1	4.6282	µm	Spot	Position	1		DAPI-	14838
88918.3	40001	4.67961	µm	Spot	Position	1		DAPI-	14839
88920.1	40001.1	4.70137	µm	Spot	Position	1		DAPI-	14840
88922.5	40001.8	4.73902	µm	Spot	Position	1		DAPI-	14841
88923.6	40001.8	4.76847	µm	Spot	Position	1		DAPI-	14842
88912.2	40002.2	4.56822	µm	Spot	Position	1		DAPI-	14843
88918.3	40002.3	4.69197	µm	Spot	Position	1		DAPI-	14844
88917.1	40002.5	4.66883	µm	Spot	Position	1		DAPI-	14845
88920.1	40002.4	4.71552	µm	Spot	Position	1		DAPI-	14846
88921.8	40002.9	4.7407	µm	Spot	Position	1		DAPI-	14847
88918.3	40003.1	4.69768	µm	Spot	Position	1		DAPI-	14848
88912.8	40003.2	4.58693	µm	Spot	Position	1		DAPI-	14849
88915.5	40003.3	4.64104	µm	Spot	Position	1		DAPI-	14850
88911.5	40003.5	4.5655	µm	Spot	Position	1		DAPI-	14851
88912.8	40004	4.59065	µm	Spot	Position	1		DAPI-	14852
88923	40004.1	4.76006	µm	Spot	Position	1		DAPI-	14853
88914	40004.3	4.63088	µm	Spot	Position	1		DAPI-	14854
88922	40004.2	4.74137	µm	Spot	Position	1		DAPI-	14855
88916.3	40004.5	4.66673	µm	Spot	Position	1		DAPI-	14856
88915.1	40004.7	4.64278	µm	Spot	Position	1		DAPI-	14857
88920	40004.9	4.72785	µm	Spot	Position	1		DAPI-	14858
88912.3	40005	4.58001	µm	Spot	Position	1		DAPI-	14859
88918.6	40005.1	4.69855	µm	Spot	Position	1		DAPI-	14860
88915.8	40005.5	4.6721	µm	Spot	Position	1		DAPI-	14861
88921.1	40005.8	4.75707	µm	Spot	Position	1		DAPI-	14862
88922.5	40005.7	4.77329	µm	Spot	Position	1		DAPI-	14863
88909.8	40005.9	4.51445	µm	Spot	Position	1		DAPI-	14864
88910.5	40005.9	4.54727	µm	Spot	Position	1		DAPI-	14865
88919.5	40005.9	4.72164	µm	Spot	Position	1		DAPI-	14866
88917.4	40006.2	4.68931	µm	Spot	Position	1		DAPI-	14867
88912.2	40006.4	4.59737	µm	Spot	Position	1		DAPI-	14868
88914.9	40006.6	4.65823	µm	Spot	Position	1		DAPI-	14869
88918.4	40006.6	4.71146	µm	Spot	Position	1		DAPI-	14870
88922.4	40006.6	4.77383	µm	Spot	Position	1		DAPI-	14871
88921.1	40006.8	4.75508	µm	Spot	Position	1		DAPI-	14872
88908.6	40007.1	4.51418	µm	Spot	Position	1		DAPI-	14873
88911.1	40007	4.57448	µm	Spot	Position	1		DAPI-	14874
88919.8	40007.5	4.73303	µm	Spot	Position	1		DAPI-	14875
88920.7	40007.6	4.74704	µm	Spot	Position	1		DAPI-	14876
88912.8	40007.8	4.61131	µm	Spot	Position	1		DAPI-	14877
88914.9	40007.8	4.6601	µm	Spot	Position	1		DAPI-	14878
88908.3	40008.2	4.51747	µm	Spot	Position	1		DAPI-	14879
88916.6	40008.2	4.69382	µm	Spot	Position	1		DAPI-	14880
88909.9	40008.4	4.54001	µm	Spot	Position	1		DAPI-	14881
88922.2	40008.4	4.77068	µm	Spot	Position	1		DAPI-	14882
88909.1	40008.7	4.53045	µm	Spot	Position	1		DAPI-	14883
88915.2	40008.7	4.66616	µm	Spot	Position	1		DAPI-	14884
88918.9	40008.8	4.73841	µm	Spot	Position	1		DAPI-	14885
88914.4	40009.1	4.66745	µm	Spot	Position	1		DAPI-	14886
88913.5	40009.3	4.64811	µm	Spot	Position	1		DAPI-	14887
88919.8	40009.3	4.74606	µm	Spot	Position	1		DAPI-	14888
88912.2	40009.7	4.60617	µm	Spot	Position	1		DAPI-	14889
88921.8	40009.6	4.78721	µm	Spot	Position	1		DAPI-	14890
88909.3	40010	4.54608	µm	Spot	Position	1		DAPI-	14891
88915.5	40010	4.68561	µm	Spot	Position	1		DAPI-	14892
88920	40010.1	4.75403	µm	Spot	Position	1		DAPI-	14893
88917.3	40010.2	4.71689	µm	Spot	Position	1		DAPI-	14894
88910.3	40011	4.58651	µm	Spot	Position	1		DAPI-	14895
88912	40011.2	4.62798	µm	Spot	Position	1		DAPI-	14896
88909.3	40011.3	4.56071	µm	Spot	Position	1		DAPI-	14897
88913.3	40011.2	4.6486	µm	Spot	Position	1		DAPI-	14898
88915	40011.2	4.6832	µm	Spot	Position	1		DAPI-	14899
88919	40011.5	4.76123	µm	Spot	Position	1		DAPI-	14900
88876.8	40011.9	3.8733	µm	Spot	Position	1		DAPI-	14954
88868.7	40012.3	3.71924	µm	Spot	Position	1		DAPI-	14955
88864.9	40012.5	3.62395	µm	Spot	Position	1		DAPI-	14956
88866.3	40012.4	3.66057	µm	Spot	Position	1		DAPI-	14957
88870.9	40012.4	3.7678	µm	Spot	Position	1		DAPI-	14958
88875.1	40012.4	3.85042	µm	Spot	Position	1		DAPI-	14959
88873.8	40012.8	3.82296	µm	Spot	Position	1		DAPI-	14960
88869.3	40012.9	3.73286	µm	Spot	Position	1		DAPI-	14961
88868.1	40013.1	3.71776	µm	Spot	Position	1		DAPI-	14962
88872.7	40013	3.7978	µm	Spot	Position	1		DAPI-	14963
88866.2	40013.3	3.66146	µm	Spot	Position	1		DAPI-	14964
88870.7	40013.4	3.76733	µm	Spot	Position	1		DAPI-	14965
88875.3	40013.4	3.86638	µm	Spot	Position	1		DAPI-	14966
88872.6	40014.1	3.81101	µm	Spot	Position	1		DAPI-	14967
88867.1	40014.2	3.68049	µm	Spot	Position	1		DAPI-	14968
88865.8	40014.8	3.6661	µm	Spot	Position	1		DAPI-	14969
88869.5	40015	3.74378	µm	Spot	Position	1		DAPI-	14970
88874.8	40014.9	3.85315	µm	Spot	Position	1		DAPI-	14971
88870.6	40015.1	3.77495	µm	Spot	Position	1		DAPI-	14972
88867.9	40015.2	3.72017	µm	Spot	Position	1		DAPI-	14973
88866.6	40015.5	3.68007	µm	Spot	Position	1		DAPI-	14974
88863.8	40015.7	3.61609	µm	Spot	Position	1		DAPI-	14975
88872.4	40015.6	3.82344	µm	Spot	Position	1		DAPI-	14976
88870.6	40015.9	3.78438	µm	Spot	Position	1		DAPI-	14977
88874.5	40015.9	3.85402	µm	Spot	Position	1		DAPI-	14978
88863.6	40016.6	3.63098	µm	Spot	Position	1		DAPI-	14979
88871.8	40016.6	3.81023	µm	Spot	Position	1		DAPI-	14980
88868.9	40016.9	3.73849	µm	Spot	Position	1		DAPI-	14981
88875.5	40017	3.8921	µm	Spot	Position	1		DAPI-	14982
88866.7	40017.2	3.70031	µm	Spot	Position	1		DAPI-	14983
88873.4	40017.4	3.85423	µm	Spot	Position	1		DAPI-	14984
88865	40017.6	3.65183	µm	Spot	Position	1		DAPI-	14985
88868.2	40017.8	3.75444	µm	Spot	Position	1		DAPI-	14986
88872.5	40017.9	3.82408	µm	Spot	Position	1		DAPI-	14987
88870.1	40017.9	3.77219	µm	Spot	Position	1		DAPI-	14988
88865.5	40018.5	3.68466	µm	Spot	Position	1		DAPI-	14989
88869.3	40018.9	3.7635	µm	Spot	Position	1		DAPI-	14990
88872.5	40018.9	3.83752	µm	Spot	Position	1		DAPI-	14991
88873.3	40019	3.8626	µm	Spot	Position	1		DAPI-	14992
88864.9	40019.1	3.66123	µm	Spot	Position	1		DAPI-	14993
88867.8	40019.2	3.73921	µm	Spot	Position	1		DAPI-	14994
88870.3	40019.5	3.79892	µm	Spot	Position	1		DAPI-	14995
88863.1	40019.8	3.62871	µm	Spot	Position	1		DAPI-	14996
88865.6	40020.2	3.69125	µm	Spot	Position	1		DAPI-	14997
88867.9	40020.3	3.74844	µm	Spot	Position	1		DAPI-	14998
88872.1	40020.4	3.84401	µm	Spot	Position	1		DAPI-	14999
88862.8	40020.8	3.61175	µm	Spot	Position	1		DAPI-	15000
88864.3	40020.7	3.64599	µm	Spot	Position	1		DAPI-	15001
88867	40021.3	3.7136	µm	Spot	Position	1		DAPI-	15002
88867.9	40021.4	3.7564	µm	Spot	Position	1		DAPI-	15003
88873.9	40021.5	3.87531	µm	Spot	Position	1		DAPI-	15004
88869.7	40021.6	3.79145	µm	Spot	Position	1		DAPI-	15005
88865.7	40021.9	3.71302	µm	Spot	Position	1		DAPI-	15006
88870.5	40021.9	3.82278	µm	Spot	Position	1		DAPI-	15007
88872.5	40022.3	3.85746	µm	Spot	Position	1		DAPI-	15008
88866.8	40022.5	3.72763	µm	Spot	Position	1		DAPI-	15009
88873.2	40022.9	3.87264	µm	Spot	Position	1		DAPI-	15010
88867.7	40023.4	3.76459	µm	Spot	Position	1		DAPI-	15012
88870.7	40023.4	3.84148	µm	Spot	Position	1		DAPI-	15013
88864.8	40023.5	3.6749	µm	Spot	Position	1		DAPI-	15014
88866.4	40023.6	3.73225	µm	Spot	Position	1		DAPI-	15015
88872.1	40023.9	3.84506	µm	Spot	Position	1		DAPI-	15016
88873	40023.9	3.86421	µm	Spot	Position	1		DAPI-	15017
88870.5	40024.6	3.84687	µm	Spot	Position	1		DAPI-	15020
88873.2	40024.8	3.89683	µm	Spot	Position	1		DAPI-	15021
88868.8	40025	3.79128	µm	Spot	Position	1		DAPI-	15022
88867.6	40025.4	3.75695	µm	Spot	Position	1		DAPI-	15024
88878.2	40011.8	3.9398	µm	Spot	Position	1		DAPI-	15147
88880.7	40011.9	4.00052	µm	Spot	Position	1		DAPI-	15148
88891.1	40012.2	4.19341	µm	Spot	Position	1		DAPI-	15149
88888.8	40012.5	4.14636	µm	Spot	Position	1		DAPI-	15150
88883.8	40012.6	4.05463	µm	Spot	Position	1		DAPI-	15151
88880.1	40012.8	3.98804	µm	Spot	Position	1		DAPI-	15152
88882.1	40012.7	4.01985	µm	Spot	Position	1		DAPI-	15153
88885.8	40013	4.09606	µm	Spot	Position	1		DAPI-	15154
88887.4	40013.2	4.11105	µm	Spot	Position	1		DAPI-	15155
88891.2	40013.1	4.19686	µm	Spot	Position	1		DAPI-	15156
88885	40013.4	4.08373	µm	Spot	Position	1		DAPI-	15157
88878.5	40013.7	3.95325	µm	Spot	Position	1		DAPI-	15158
88882	40013.6	4.03407	µm	Spot	Position	1		DAPI-	15159
88880.6	40014.1	4.00211	µm	Spot	Position	1		DAPI-	15160
88884.2	40014.6	4.08386	µm	Spot	Position	1		DAPI-	15161
88886.7	40014.8	4.12168	µm	Spot	Position	1		DAPI-	15162
88879.3	40014.9	3.97891	µm	Spot	Position	1		DAPI-	15163
88878.4	40015.1	3.96048	µm	Spot	Position	1		DAPI-	15164
88882.6	40015	4.04687	µm	Spot	Position	1		DAPI-	15165
88888	40015.1	4.15055	µm	Spot	Position	1		DAPI-	15166
88877	40015.3	3.91114	µm	Spot	Position	1		DAPI-	15167
88888.8	40015.2	4.16773	µm	Spot	Position	1		DAPI-	15168
88876	40015.4	3.9094	µm	Spot	Position	1		DAPI-	15169
88883.2	40015.7	4.06216	µm	Spot	Position	1		DAPI-	15170
88884.5	40015.8	4.08599	µm	Spot	Position	1		DAPI-	15171
88881.5	40016	4.03652	µm	Spot	Position	1		DAPI-	15172
88878.3	40016.2	3.97017	µm	Spot	Position	1		DAPI-	15173
88886.8	40016.2	4.14057	µm	Spot	Position	1		DAPI-	15174
88889.2	40016.2	4.1828	µm	Spot	Position	1		DAPI-	15175
88876	40016.4	3.91384	µm	Spot	Position	1		DAPI-	15176
88877	40016.9	3.91652	µm	Spot	Position	1		DAPI-	15177
88882.3	40017.3	4.05321	µm	Spot	Position	1		DAPI-	15178
88880.2	40017.5	4.02341	µm	Spot	Position	1		DAPI-	15179
88884.5	40017.4	4.11028	µm	Spot	Position	1		DAPI-	15180
88878.1	40017.7	3.97532	µm	Spot	Position	1		DAPI-	15181
88886.4	40017.6	4.15342	µm	Spot	Position	1		DAPI-	15182
88888.8	40017.6	4.19184	µm	Spot	Position	1		DAPI-	15183
88887.4	40018.2	4.17054	µm	Spot	Position	1		DAPI-	15184
88882	40018.3	4.06051	µm	Spot	Position	1		DAPI-	15185
88883.3	40018.4	4.08628	µm	Spot	Position	1		DAPI-	15186
88880.5	40018.5	4.03718	µm	Spot	Position	1		DAPI-	15187
88875.5	40018.7	3.90732	µm	Spot	Position	1		DAPI-	15188
88886.8	40019.3	4.15567	µm	Spot	Position	1		DAPI-	15189
88876	40019.4	3.92311	µm	Spot	Position	1		DAPI-	15190
88884.9	40019.4	4.11637	µm	Spot	Position	1		DAPI-	15191
88878	40019.9	3.99036	µm	Spot	Position	1		DAPI-	15192
88880.4	40019.7	4.04546	µm	Spot	Position	1		DAPI-	15193
88881.2	40019.8	4.05962	µm	Spot	Position	1		DAPI-	15194
88882.8	40019.9	4.09823	µm	Spot	Position	1		DAPI-	15195
88875.5	40020.3	3.92142	µm	Spot	Position	1		DAPI-	15196
88883.2	40020.7	4.12095	µm	Spot	Position	1		DAPI-	15197
88885.9	40020.7	4.18	µm	Spot	Position	1		DAPI-	15198
88878.4	40020.8	3.99981	µm	Spot	Position	1		DAPI-	15199
88881.8	40020.9	4.07244	µm	Spot	Position	1		DAPI-	15200
88884.9	40021.2	4.13272	µm	Spot	Position	1		DAPI-	15201
88886.9	40021.2	4.1831	µm	Spot	Position	1		DAPI-	15202
88875.6	40021.5	3.94401	µm	Spot	Position	1		DAPI-	15203
88879.8	40021.8	4.03553	µm	Spot	Position	1		DAPI-	15204
88877.9	40022	4.00119	µm	Spot	Position	1		DAPI-	15205
88882	40022.3	4.08368	µm	Spot	Position	1		DAPI-	15206
88883.6	40022.4	4.13663	µm	Spot	Position	1		DAPI-	15207
88886.4	40022.4	4.18836	µm	Spot	Position	1		DAPI-	15208
88880.5	40023.3	4.06725	µm	Spot	Position	1		DAPI-	15209
88875.7	40023.3	3.95929	µm	Spot	Position	1		DAPI-	15210
88878.1	40023.5	4.00692	µm	Spot	Position	1		DAPI-	15211
88881.5	40023.6	4.08526	µm	Spot	Position	1		DAPI-	15212
88894	40011.7	4.26251	µm	Spot	Position	1		DAPI-	15397
88898.9	40011.7	4.37261	µm	Spot	Position	1		DAPI-	15398
88901.5	40012.1	4.41911	µm	Spot	Position	1		DAPI-	15399
88895.2	40012.4	4.31868	µm	Spot	Position	1		DAPI-	15400
88904.5	40012.4	4.46255	µm	Spot	Position	1		DAPI-	15401
88894.3	40012.6	4.27685	µm	Spot	Position	1		DAPI-	15402
88897.1	40012.7	4.34408	µm	Spot	Position	1		DAPI-	15403
88899.1	40012.8	4.38196	µm	Spot	Position	1		DAPI-	15404
88903.6	40013	4.44543	µm	Spot	Position	1		DAPI-	15405
88901.1	40013.1	4.41784	µm	Spot	Position	1		DAPI-	15406
88902.3	40013.2	4.44012	µm	Spot	Position	1		DAPI-	15407
88896.8	40013.7	4.34598	µm	Spot	Position	1		DAPI-	15408
88904.3	40013.6	4.46024	µm	Spot	Position	1		DAPI-	15409
88899.2	40013.9	4.39124	µm	Spot	Position	1		DAPI-	15410
88894	40013.9	4.28894	µm	Spot	Position	1		DAPI-	15411
88900.3	40014	4.41628	µm	Spot	Position	1		DAPI-	15412
88902.3	40014.2	4.45481	µm	Spot	Position	1		DAPI-	15413
88898.1	40014.5	4.38706	µm	Spot	Position	1		DAPI-	15414
88899.6	40014.8	4.4028	µm	Spot	Position	1		DAPI-	15415
88892.2	40014.9	4.25625	µm	Spot	Position	1		DAPI-	15416
88895.5	40014.9	4.33086	µm	Spot	Position	1		DAPI-	15417
88900.4	40014.9	4.42976	µm	Spot	Position	1		DAPI-	15418
88893.9	40015	4.3065	µm	Spot	Position	1		DAPI-	15419
88896.5	40015.1	4.35302	µm	Spot	Position	1		DAPI-	15420
88901.6	40015.3	4.43691	µm	Spot	Position	1		DAPI-	15421
88904.6	40015.5	4.48171	µm	Spot	Position	1		DAPI-	15422
88895.5	40016	4.35344	µm	Spot	Position	1		DAPI-	15423
88893.8	40016.4	4.31782	µm	Spot	Position	1		DAPI-	15424
88897.2	40016.4	4.37669	µm	Spot	Position	1		DAPI-	15425
88901.7	40016.3	4.44988	µm	Spot	Position	1		DAPI-	15426
88903.8	40016.4	4.49048	µm	Spot	Position	1		DAPI-	15427
88896.4	40016.6	4.36312	µm	Spot	Position	1		DAPI-	15428
88899.3	40016.5	4.41104	µm	Spot	Position	1		DAPI-	15429
88894.8	40017	4.33494	µm	Spot	Position	1		DAPI-	15430
88891.8	40017.2	4.26768	µm	Spot	Position	1		DAPI-	15431
88899.5	40017.7	4.43474	µm	Spot	Position	1		DAPI-	15432
88902.9	40017.7	4.4886	µm	Spot	Position	1		DAPI-	15433
88894.2	40017.7	4.31683	µm	Spot	Position	1		DAPI-	15434
88897.2	40017.7	4.39249	µm	Spot	Position	1		DAPI-	15435
88895.3	40017.9	4.35049	µm	Spot	Position	1		DAPI-	15436
88888.7	40018.4	4.20967	µm	Spot	Position	1		DAPI-	15437
88891.1	40018.4	4.26267	µm	Spot	Position	1		DAPI-	15438
88898.5	40018.4	4.42118	µm	Spot	Position	1		DAPI-	15439
88899.4	40018.5	4.42113	µm	Spot	Position	1		DAPI-	15440
88901.9	40018.6	4.47106	µm	Spot	Position	1		DAPI-	15441
88896.3	40019	4.3935	µm	Spot	Position	1		DAPI-	15442
88891.7	40019.2	4.2787	µm	Spot	Position	1		DAPI-	15443
88897.2	40019.2	4.40103	µm	Spot	Position	1		DAPI-	15444
88899.3	40019.3	4.4301	µm	Spot	Position	1		DAPI-	15445
88901.9	40019.8	4.48235	µm	Spot	Position	1		DAPI-	15446
88888.3	40020	4.21843	µm	Spot	Position	1		DAPI-	15447
88889.5	40020	4.25076	µm	Spot	Position	1		DAPI-	15448
88896.5	40019.9	4.39521	µm	Spot	Position	1		DAPI-	15449
88894.2	40020.3	4.34728	µm	Spot	Position	1		DAPI-	15450
88899.3	40020.5	4.45284	µm	Spot	Position	1		DAPI-	15451
88898	40020.7	4.44222	µm	Spot	Position	1		DAPI-	15452
88901.2	40020.9	4.49323	µm	Spot	Position	1		DAPI-	15453
88894.3	40021.1	4.35504	µm	Spot	Position	1		DAPI-	15454
88893	40021.3	4.33165	µm	Spot	Position	1		DAPI-	15455
88896.6	40021.3	4.417	µm	Spot	Position	1		DAPI-	15456
88899.2	40021.5	4.45012	µm	Spot	Position	1		DAPI-	15457
88900.1	40021.6	4.46908	µm	Spot	Position	1		DAPI-	15458
88898.1	40022	4.46037	µm	Spot	Position	1		DAPI-	15459
88891.5	40022.3	4.30521	µm	Spot	Position	1		DAPI-	15460
88900.9	40022.4	4.49913	µm	Spot	Position	1		DAPI-	15461
88894	40022.6	4.36282	µm	Spot	Position	1		DAPI-	15462
88896.9	40022.6	4.43273	µm	Spot	Position	1		DAPI-	15463
88888.9	40022.8	4.24197	µm	Spot	Position	1		DAPI-	15464
88899.1	40022.9	4.46151	µm	Spot	Position	1		DAPI-	15465
88905.6	40015.7	4.52385	µm	Spot	Position	1		DAPI-	15667
88904.8	40017.7	4.53307	µm	Spot	Position	1		DAPI-	15668
88904.2	40019.9	4.53648	µm	Spot	Position	1		DAPI-	15669
88905.4	40020.1	4.57152	µm	Spot	Position	1		DAPI-	15670
88902.9	40020.4	4.52544	µm	Spot	Position	1		DAPI-	15671
88905.7	40021.2	4.59255	µm	Spot	Position	1		DAPI-	15672
88903.1	40021.8	4.54898	µm	Spot	Position	1		DAPI-	15673
88904.4	40022.2	4.58238	µm	Spot	Position	1		DAPI-	15674
88910.4	40011.8	4.59313	µm	Spot	Position	1		DAPI-	15839
88917.1	40012.2	4.72035	µm	Spot	Position	1		DAPI-	15840
88907.2	40012.4	4.50788	µm	Spot	Position	1		DAPI-	15841
88912.5	40012.4	4.63702	µm	Spot	Position	1		DAPI-	15842
88920.2	40012.4	4.77841	µm	Spot	Position	1		DAPI-	15843
88909.4	40012.6	4.56235	µm	Spot	Position	1		DAPI-	15844
88913.6	40012.7	4.67695	µm	Spot	Position	1		DAPI-	15845
88911.2	40013.2	4.62518	µm	Spot	Position	1		DAPI-	15846
88912.2	40013.3	4.64688	µm	Spot	Position	1		DAPI-	15847
88914.8	40013.3	4.68633	µm	Spot	Position	1		DAPI-	15848
88916.9	40013.3	4.73466	µm	Spot	Position	1		DAPI-	15849
88917.7	40013.3	4.7412	µm	Spot	Position	1		DAPI-	15850
88906.5	40013.5	4.52347	µm	Spot	Position	1		DAPI-	15851
88909.3	40013.4	4.57739	µm	Spot	Position	1		DAPI-	15852
88910.5	40013.5	4.60576	µm	Spot	Position	1		DAPI-	15853
88912.8	40013.7	4.65634	µm	Spot	Position	1		DAPI-	15854
88920	40013.8	4.78099	µm	Spot	Position	1		DAPI-	15855
88913.8	40014	4.68317	µm	Spot	Position	1		DAPI-	15856
88907.4	40014.2	4.53659	µm	Spot	Position	1		DAPI-	15857
88909.7	40014.2	4.58855	µm	Spot	Position	1		DAPI-	15858
88918.2	40014.3	4.76551	µm	Spot	Position	1		DAPI-	15859
88908.5	40014.5	4.57412	µm	Spot	Position	1		DAPI-	15860
88912.3	40014.7	4.65039	µm	Spot	Position	1		DAPI-	15861
88914.9	40015.1	4.70639	µm	Spot	Position	1		DAPI-	15862
88907.5	40015.3	4.53803	µm	Spot	Position	1		DAPI-	15863
88917.5	40015.3	4.76078	µm	Spot	Position	1		DAPI-	15864
88916	40015.6	4.75084	µm	Spot	Position	1		DAPI-	15865
88920	40015.6	4.7846	µm	Spot	Position	1		DAPI-	15866
88909.9	40015.8	4.60693	µm	Spot	Position	1		DAPI-	15867
88912.3	40015.8	4.65576	µm	Spot	Position	1		DAPI-	15868
88913.4	40015.8	4.68871	µm	Spot	Position	1		DAPI-	15869
88911.2	40016.1	4.6618	µm	Spot	Position	1		DAPI-	15870
88918.1	40016.2	4.76436	µm	Spot	Position	1		DAPI-	15871
88906.8	40016.4	4.55517	µm	Spot	Position	1		DAPI-	15872
88908.1	40016.7	4.5949	µm	Spot	Position	1		DAPI-	15873
88915.4	40017.1	4.7328	µm	Spot	Position	1		DAPI-	15874
88919.3	40017.2	4.80063	µm	Spot	Position	1		DAPI-	15875
88912.3	40017.3	4.67305	µm	Spot	Position	1		DAPI-	15876
88916.6	40017.4	4.76093	µm	Spot	Position	1		DAPI-	15877
88909.9	40017.6	4.62121	µm	Spot	Position	1		DAPI-	15878
88907.9	40017.9	4.59305	µm	Spot	Position	1		DAPI-	15879
88917.7	40017.8	4.76626	µm	Spot	Position	1		DAPI-	15880
88913.5	40018.2	4.7116	µm	Spot	Position	1		DAPI-	15881
88909.3	40018.8	4.63281	µm	Spot	Position	1		DAPI-	15882
88916.6	40018.7	4.78745	µm	Spot	Position	1		DAPI-	15883
88918.2	40018.7	4.78495	µm	Spot	Position	1		DAPI-	15884
88910.7	40018.9	4.66084	µm	Spot	Position	1		DAPI-	15885
88911.8	40019.1	4.69349	µm	Spot	Position	1		DAPI-	15886
88914	40019.3	4.73746	µm	Spot	Position	1		DAPI-	15887
88910.7	40019.8	4.67838	µm	Spot	Position	1		DAPI-	15888
88916.5	40019.8	4.78192	µm	Spot	Position	1		DAPI-	15889
88907.3	40019.9	4.60012	µm	Spot	Position	1		DAPI-	15890
88909.6	40020	4.65499	µm	Spot	Position	1		DAPI-	15891
88915	40019.9	4.7567	µm	Spot	Position	1		DAPI-	15892
88908.5	40020.2	4.63892	µm	Spot	Position	1		DAPI-	15893
88917.3	40020.1	4.78247	µm	Spot	Position	1		DAPI-	15894
88912.4	40020.2	4.71087	µm	Spot	Position	1		DAPI-	15895
88907.3	40020.9	4.61724	µm	Spot	Position	1		DAPI-	15896
88909.7	40020.9	4.65063	µm	Spot	Position	1		DAPI-	15897
88917.7	40021.1	4.79418	µm	Spot	Position	1		DAPI-	15898
88912.7	40021.4	4.71849	µm	Spot	Position	1		DAPI-	15899
88916.1	40021.6	4.78562	µm	Spot	Position	1		DAPI-	15900
88907.2	40021.8	4.62666	µm	Spot	Position	1		DAPI-	15901
88909.2	40022	4.66297	µm	Spot	Position	1		DAPI-	15902
88914.9	40021.9	4.77741	µm	Spot	Position	1		DAPI-	15903
88910.7	40022.3	4.69392	µm	Spot	Position	1		DAPI-	15904
88908.4	40022.9	4.66532	µm	Spot	Position	1		DAPI-	15905
88907.4	40023.2	4.6338	µm	Spot	Position	1		DAPI-	15906
88912.1	40023.2	4.73554	µm	Spot	Position	1		DAPI-	15907
88909.8	40023.3	4.67519	µm	Spot	Position	1		DAPI-	15908
88913.7	40023.6	4.7711	µm	Spot	Position	1		DAPI-	15909
88914.5	40023.9	4.78443	µm	Spot	Position	1		DAPI-	15911
88053.8	40256.6	3.80294	µm	Spot	Position	1		DAPI-	17666
88084.2	40310.1	3.91344	µm	Spot	Position	1		DAPI-	17698
88062.4	40404.6	4.43985	µm	Spot	Position	1		DAPI-	17732
88469.2	39871.1	5.89926	µm	Spot	Position	1		DAPI-	18245
88536.9	39931.6	5.64933	µm	Spot	Position	1		DAPI-	20469
88259.3	39991	5.55965	µm	Spot	Position	1		DAPI-	21417
88278.2	39979.1	5.90444	µm	Spot	Position	1		DAPI-	21422
88939.9	39972.8	5.05587	µm	Spot	Position	1		DAPI-	21473
88939	39973.2	5.04097	µm	Spot	Position	1		DAPI-	21476
88941.3	39973.4	5.08824	µm	Spot	Position	1		DAPI-	21478
88940	39974.1	5.06931	µm	Spot	Position	1		DAPI-	21482
88938.6	39974.5	5.03289	µm	Spot	Position	1		DAPI-	21483
88938.4	39975.8	5.02352	µm	Spot	Position	1		DAPI-	21490
88941	39975.8	5.08075	µm	Spot	Position	1		DAPI-	21491
88939.7	39976.2	5.07222	µm	Spot	Position	1		DAPI-	21494
88938.8	39977.2	5.03107	µm	Spot	Position	1		DAPI-	21501
88940.3	39978.5	5.07762	µm	Spot	Position	1		DAPI-	21506
88939.1	39978.6	5.04091	µm	Spot	Position	1		DAPI-	21509
88937.8	39979.2	5.02892	µm	Spot	Position	1		DAPI-	21512
88940.7	39979.3	5.09112	µm	Spot	Position	1		DAPI-	21513
88935.2	39979.5	4.99733	µm	Spot	Position	1		DAPI-	21514
88936.5	39979.7	5.01137	µm	Spot	Position	1		DAPI-	21516
88939.1	39980.1	5.04274	µm	Spot	Position	1		DAPI-	21517
88935.4	39981.1	4.99367	µm	Spot	Position	1		DAPI-	21522
88937.9	39981.5	5.02544	µm	Spot	Position	1		DAPI-	21525
88941.3	39981.5	5.09837	µm	Spot	Position	1		DAPI-	21526
88937.9	39982.3	5.03281	µm	Spot	Position	1		DAPI-	21527
88935.6	39982.5	4.9928	µm	Spot	Position	1		DAPI-	21528
88940.9	39982.5	5.0893	µm	Spot	Position	1		DAPI-	21529
88934.7	39982.7	4.98635	µm	Spot	Position	1		DAPI-	21531
88937.9	39983.4	5.03525	µm	Spot	Position	1		DAPI-	21533
88933.2	39983.5	4.95943	µm	Spot	Position	1		DAPI-	21535
88936.5	39984	5.00448	µm	Spot	Position	1		DAPI-	21536
88939.6	39983.9	5.0632	µm	Spot	Position	1		DAPI-	21537
88930.3	39984.5	4.90575	µm	Spot	Position	1		DAPI-	21538
88935.9	39984.5	4.99655	µm	Spot	Position	1		DAPI-	21539
88935.1	39984.8	4.9998	µm	Spot	Position	1		DAPI-	21540
88936.6	39984.9	5.0089	µm	Spot	Position	1		DAPI-	21541
88927.9	39985	4.81783	µm	Spot	Position	1		DAPI-	21542
88933.6	39985	4.96361	µm	Spot	Position	1		DAPI-	21543
88938.2	39985.1	5.03677	µm	Spot	Position	1		DAPI-	21544
88941	39985.5	5.09401	µm	Spot	Position	1		DAPI-	21545
88932.3	39985.7	4.96025	µm	Spot	Position	1		DAPI-	21546
88928.3	39985.9	4.84371	µm	Spot	Position	1		DAPI-	21547
88940	39986.1	5.09195	µm	Spot	Position	1		DAPI-	21548
88930.8	39986.2	4.91932	µm	Spot	Position	1		DAPI-	21549
88937.3	39986.2	5.03108	µm	Spot	Position	1		DAPI-	21550
88933	39986.5	4.9578	µm	Spot	Position	1		DAPI-	21551
88935.3	39986.6	5.00001	µm	Spot	Position	1		DAPI-	21552
88938.9	39986.8	5.04414	µm	Spot	Position	1		DAPI-	21553
88934.5	39987.1	4.99416	µm	Spot	Position	1		DAPI-	21554
88932.2	39987.3	4.95968	µm	Spot	Position	1		DAPI-	21555
88929.1	39987.4	4.87166	µm	Spot	Position	1		DAPI-	21556
88935.7	39987.6	4.99352	µm	Spot	Position	1		DAPI-	21557
88938.8	39987.6	5.05551	µm	Spot	Position	1		DAPI-	21558
88927.8	39987.9	4.83253	µm	Spot	Position	1		DAPI-	21559
88930.3	39987.9	4.91949	µm	Spot	Position	1		DAPI-	21560
88940.9	39988.3	5.10057	µm	Spot	Position	1		DAPI-	21561
88931.1	39988.3	4.93052	µm	Spot	Position	1		DAPI-	21562
88932.2	39988.3	4.95199	µm	Spot	Position	1		DAPI-	21563
88939.9	39988.3	5.09826	µm	Spot	Position	1		DAPI-	21564
88937.2	39988.5	5.03044	µm	Spot	Position	1		DAPI-	21565
88938.4	39988.6	5.05237	µm	Spot	Position	1		DAPI-	21566
88927.7	39988.9	4.83873	µm	Spot	Position	1		DAPI-	21567
88935.5	39989.2	5.00824	µm	Spot	Position	1		DAPI-	21568
88928.4	39989.3	4.85467	µm	Spot	Position	1		DAPI-	21569
88932.9	39989.5	4.97472	µm	Spot	Position	1		DAPI-	21570
88933.9	39989.4	4.98674	µm	Spot	Position	1		DAPI-	21571
88940.5	39989.7	5.08891	µm	Spot	Position	1		DAPI-	21572
88930.9	39990	4.9253	µm	Spot	Position	1		DAPI-	21573
88927.7	39990.2	4.85359	µm	Spot	Position	1		DAPI-	21574
88937.1	39990.1	5.03702	µm	Spot	Position	1		DAPI-	21575
88940.1	39990.4	5.08424	µm	Spot	Position	1		DAPI-	21576
88929	39990.6	4.88803	µm	Spot	Position	1		DAPI-	21577
88936	39990.7	5.02009	µm	Spot	Position	1		DAPI-	21578
88932.9	39991	4.97465	µm	Spot	Position	1		DAPI-	21579
88934.4	39990.9	5.00392	µm	Spot	Position	1		DAPI-	21580
88937.4	39991.2	5.03431	µm	Spot	Position	1		DAPI-	21581
88927.7	39991.4	4.84022	µm	Spot	Position	1		DAPI-	21582
88928.5	39991.4	4.88028	µm	Spot	Position	1		DAPI-	21583
88930.8	39991.3	4.93958	µm	Spot	Position	1		DAPI-	21584
88935.8	39991.8	5.01971	µm	Spot	Position	1		DAPI-	21585
88934.7	39992	5.00953	µm	Spot	Position	1		DAPI-	21586
88939.1	39992	5.06296	µm	Spot	Position	1		DAPI-	21587
88928.7	39992.6	4.88728	µm	Spot	Position	1		DAPI-	21588
88930	39992.6	4.92875	µm	Spot	Position	1		DAPI-	21589
88933.4	39992.7	4.98491	µm	Spot	Position	1		DAPI-	21590
88938.4	39993.1	5.06468	µm	Spot	Position	1		DAPI-	21591
88939.8	39993.2	5.09785	µm	Spot	Position	1		DAPI-	21592
88931	39993.5	4.94628	µm	Spot	Position	1		DAPI-	21593
88928.2	39993.7	4.87495	µm	Spot	Position	1		DAPI-	21594
88932.9	39993.8	4.98906	µm	Spot	Position	1		DAPI-	21595
88929	39994	4.90619	µm	Spot	Position	1		DAPI-	21596
88938.4	39994	5.07797	µm	Spot	Position	1		DAPI-	21597
88928.1	39994.5	4.87505	µm	Spot	Position	1		DAPI-	21598
88930.9	39994.6	4.94836	µm	Spot	Position	1		DAPI-	21599
88933	39994.9	4.98952	µm	Spot	Position	1		DAPI-	21600
88936.3	39994.9	5.0388	µm	Spot	Position	1		DAPI-	21601
88937.3	39995	5.06287	µm	Spot	Position	1		DAPI-	21602
88932.3	39995.2	4.97676	µm	Spot	Position	1		DAPI-	21603
88930	39995.4	4.94388	µm	Spot	Position	1		DAPI-	21604
88937.8	39995.6	5.07966	µm	Spot	Position	1		DAPI-	21605
88930.7	39995.9	4.95941	µm	Spot	Position	1		DAPI-	21606
88928	39996	4.88288	µm	Spot	Position	1		DAPI-	21607
88935.8	39996.1	5.03527	µm	Spot	Position	1		DAPI-	21608
88934.5	39996.3	5.02308	µm	Spot	Position	1		DAPI-	21609
88938.8	39996.5	5.08191	µm	Spot	Position	1		DAPI-	21610
88928.5	39996.7	4.88292	µm	Spot	Position	1		DAPI-	21611
88930	39997.1	4.95137	µm	Spot	Position	1		DAPI-	21612
88932.8	39997.1	4.99495	µm	Spot	Position	1		DAPI-	21613
88927.6	39997.3	4.8687	µm	Spot	Position	1		DAPI-	21614
88930.5	39998	4.95671	µm	Spot	Position	1		DAPI-	21615
88928.9	39998.2	4.91777	µm	Spot	Position	1		DAPI-	21616
88935.7	39998.2	5.03147	µm	Spot	Position	1		DAPI-	21617
88927.4	39998.4	4.88211	µm	Spot	Position	1		DAPI-	21618
88933	39998.4	4.98959	µm	Spot	Position	1		DAPI-	21619
88937	39998.4	5.05418	µm	Spot	Position	1		DAPI-	21620
88934.5	39999.1	5.02143	µm	Spot	Position	1		DAPI-	21621
88925.6	39999.2	4.82989	µm	Spot	Position	1		DAPI-	21622
88927.9	39999.3	4.90138	µm	Spot	Position	1		DAPI-	21623
88930.8	39999.4	4.96312	µm	Spot	Position	1		DAPI-	21624
88932.8	39999.6	4.99686	µm	Spot	Position	1		DAPI-	21625
88935.8	40000.2	5.03549	µm	Spot	Position	1		DAPI-	21626
88925.6	40000.3	4.82817	µm	Spot	Position	1		DAPI-	21627
88934.3	40000.3	5.039	µm	Spot	Position	1		DAPI-	21628
88937.7	40000.4	5.08558	µm	Spot	Position	1		DAPI-	21629
88930.9	40000.8	4.9737	µm	Spot	Position	1		DAPI-	21630
88937.1	40000.9	5.07018	µm	Spot	Position	1		DAPI-	21631
88936.1	40001	5.05795	µm	Spot	Position	1		DAPI-	21632
88926.3	40001.4	4.8666	µm	Spot	Position	1		DAPI-	21633
88928.5	40001.3	4.91408	µm	Spot	Position	1		DAPI-	21634
88925.4	40001.6	4.83055	µm	Spot	Position	1		DAPI-	21635
88930.8	40001.6	4.97617	µm	Spot	Position	1		DAPI-	21636
88927.9	40002.1	4.91967	µm	Spot	Position	1		DAPI-	21637
88932.4	40002.1	5.01258	µm	Spot	Position	1		DAPI-	21638
88931.3	40002.3	4.99335	µm	Spot	Position	1		DAPI-	21639
88934.2	40002.4	5.02257	µm	Spot	Position	1		DAPI-	21640
88935.8	40002.4	5.04429	µm	Spot	Position	1		DAPI-	21641
88936.6	40002.2	5.05194	µm	Spot	Position	1		DAPI-	21642
88930.3	40002.6	4.97292	µm	Spot	Position	1		DAPI-	21643
88933.1	40003	5.01357	µm	Spot	Position	1		DAPI-	21644
88925.1	40003.3	4.84009	µm	Spot	Position	1		DAPI-	21645
88935.1	40003.3	5.049	µm	Spot	Position	1		DAPI-	21646
88928.4	40003.5	4.93435	µm	Spot	Position	1		DAPI-	21647
88926	40004	4.87092	µm	Spot	Position	1		DAPI-	21648
88927.5	40003.8	4.92132	µm	Spot	Position	1		DAPI-	21649
88930.8	40004.3	4.99023	µm	Spot	Position	1		DAPI-	21650
88924.7	40004.4	4.82365	µm	Spot	Position	1		DAPI-	21651
88933.1	40004.6	5.01113	µm	Spot	Position	1		DAPI-	21652
88935.1	40004.6	5.05989	µm	Spot	Position	1		DAPI-	21653
88936.4	40004.7	5.07326	µm	Spot	Position	1		DAPI-	21654
88927.7	40005	4.94193	µm	Spot	Position	1		DAPI-	21655
88933.9	40005.4	5.02293	µm	Spot	Position	1		DAPI-	21656
88926	40005.8	4.88445	µm	Spot	Position	1		DAPI-	21657
88929	40005.7	4.95711	µm	Spot	Position	1		DAPI-	21658
88931.9	40005.7	5.01853	µm	Spot	Position	1		DAPI-	21659
88935.9	40005.9	5.0567	µm	Spot	Position	1		DAPI-	21660
88930.4	40006.3	4.99559	µm	Spot	Position	1		DAPI-	21661
88926.8	40006.6	4.92237	µm	Spot	Position	1		DAPI-	21662
88936.9	40007.1	5.07681	µm	Spot	Position	1		DAPI-	21663
88924.4	40007.4	4.84002	µm	Spot	Position	1		DAPI-	21664
88928.6	40007.6	4.96346	µm	Spot	Position	1		DAPI-	21665
88925.7	40008.1	4.89832	µm	Spot	Position	1		DAPI-	21666
88926.8	40008.1	4.92975	µm	Spot	Position	1		DAPI-	21667
88931.5	40008.1	5.02744	µm	Spot	Position	1		DAPI-	21668
88933.2	40008.2	5.03627	µm	Spot	Position	1		DAPI-	21669
88935.9	40008.2	5.08645	µm	Spot	Position	1		DAPI-	21670
88923.9	40008.4	4.85376	µm	Spot	Position	1		DAPI-	21671
88928.5	40008.6	4.96763	µm	Spot	Position	1		DAPI-	21672
88924.6	40008.9	4.86969	µm	Spot	Position	1		DAPI-	21673
88934.6	40009.1	5.05864	µm	Spot	Position	1		DAPI-	21674
88925.8	40009.3	4.90338	µm	Spot	Position	1		DAPI-	21675
88923.8	40009.7	4.85959	µm	Spot	Position	1		DAPI-	21676
88930.6	40009.8	4.99868	µm	Spot	Position	1		DAPI-	21677
88932.8	40009.6	5.04407	µm	Spot	Position	1		DAPI-	21678
88935.5	40010	5.07439	µm	Spot	Position	1		DAPI-	21679
88923.7	40010.6	4.86357	µm	Spot	Position	1		DAPI-	21680
88928.9	40010.7	4.97825	µm	Spot	Position	1		DAPI-	21681
88926.5	40010.9	4.94485	µm	Spot	Position	1		DAPI-	21682
88931.3	40010.9	5.01397	µm	Spot	Position	1		DAPI-	21683
88924.3	40011.1	4.88875	µm	Spot	Position	1		DAPI-	21684
88932.3	40011.2	5.03221	µm	Spot	Position	1		DAPI-	21685
88925.7	40011.3	4.93133	µm	Spot	Position	1		DAPI-	21686
88951.2	39971.6	5.32254	µm	Spot	Position	1		DAPI-	21710
88944.8	39972.4	5.25649	µm	Spot	Position	1		DAPI-	21711
88947	39972.7	5.2893	µm	Spot	Position	1		DAPI-	21712
88949.8	39972.6	5.3058	µm	Spot	Position	1		DAPI-	21713
88942.8	39973	5.19796	µm	Spot	Position	1		DAPI-	21714
88952.1	39973	5.33541	µm	Spot	Position	1		DAPI-	21715
88945.1	39973.2	5.2708	µm	Spot	Position	1		DAPI-	21716
88946.6	39973.9	5.27024	µm	Spot	Position	1		DAPI-	21717
88948.6	39973.9	5.30426	µm	Spot	Position	1		DAPI-	21718
88951	39973.8	5.32097	µm	Spot	Position	1		DAPI-	21719
88943.2	39974.1	5.20371	µm	Spot	Position	1		DAPI-	21720
88941.3	39974.3	5.11545	µm	Spot	Position	1		DAPI-	21721
88944.8	39974.7	5.2266	µm	Spot	Position	1		DAPI-	21722
88946.7	39975.2	5.28238	µm	Spot	Position	1		DAPI-	21723
88952.1	39975.6	5.34445	µm	Spot	Position	1		DAPI-	21724
88942.4	39975.9	5.16347	µm	Spot	Position	1		DAPI-	21725
88947.4	39976.3	5.29469	µm	Spot	Position	1		DAPI-	21726
88948.7	39976.4	5.31367	µm	Spot	Position	1		DAPI-	21727
88946.4	39976.9	5.28048	µm	Spot	Position	1		DAPI-	21728
88951.7	39976.9	5.32882	µm	Spot	Position	1		DAPI-	21729
88948.3	39977.1	5.32732	µm	Spot	Position	1		DAPI-	21730
88943.4	39977.5	5.2084	µm	Spot	Position	1		DAPI-	21731
88944.6	39977.5	5.24499	µm	Spot	Position	1		DAPI-	21732
88949.1	39978.2	5.31287	µm	Spot	Position	1		DAPI-	21733
88951.5	39978.3	5.33515	µm	Spot	Position	1		DAPI-	21734
88942.3	39978.5	5.15667	µm	Spot	Position	1		DAPI-	21735
88944.2	39978.6	5.22224	µm	Spot	Position	1		DAPI-	21736
88946.8	39978.7	5.28668	µm	Spot	Position	1		DAPI-	21737
88950.1	39978.7	5.31956	µm	Spot	Position	1		DAPI-	21738
88949.1	39979	5.32114	µm	Spot	Position	1		DAPI-	21739
88943.2	39979.3	5.23581	µm	Spot	Position	1		DAPI-	21740
88951.7	39979.2	5.34388	µm	Spot	Position	1		DAPI-	21741
88944.9	39979.4	5.26891	µm	Spot	Position	1		DAPI-	21742
88945.8	39979.4	5.28625	µm	Spot	Position	1		DAPI-	21743
88947	39979.9	5.29628	µm	Spot	Position	1		DAPI-	21744
88943.2	39980	5.24264	µm	Spot	Position	1		DAPI-	21745
88950.4	39980.3	5.3178	µm	Spot	Position	1		DAPI-	21746
88948.4	39980.4	5.31658	µm	Spot	Position	1		DAPI-	21747
88951.3	39980.5	5.33017	µm	Spot	Position	1		DAPI-	21748
88942.3	39980.8	5.18788	µm	Spot	Position	1		DAPI-	21749
88946.3	39981.2	5.29389	µm	Spot	Position	1		DAPI-	21750
88945.9	39981.8	5.30717	µm	Spot	Position	1		DAPI-	21751
88942.7	39982.2	5.1901	µm	Spot	Position	1		DAPI-	21752
88944.8	39982.1	5.28335	µm	Spot	Position	1		DAPI-	21753
88951.4	39982	5.34392	µm	Spot	Position	1		DAPI-	21754
88947	39982.3	5.2945	µm	Spot	Position	1		DAPI-	21755
88948.6	39982.4	5.31035	µm	Spot	Position	1		DAPI-	21756
88949.7	39982.7	5.3103	µm	Spot	Position	1		DAPI-	21757
88951.2	39982.9	5.3237	µm	Spot	Position	1		DAPI-	21758
88943.3	39983.2	5.24362	µm	Spot	Position	1		DAPI-	21759
88946	39983.2	5.30363	µm	Spot	Position	1		DAPI-	21760
88946.9	39983.5	5.29922	µm	Spot	Position	1		DAPI-	21761
88949.6	39983.7	5.32119	µm	Spot	Position	1		DAPI-	21762
88944.8	39984	5.28414	µm	Spot	Position	1		DAPI-	21763
88951.4	39984.1	5.33044	µm	Spot	Position	1		DAPI-	21764
88948.8	39984.4	5.32637	µm	Spot	Position	1		DAPI-	21765
88947.2	39984.7	5.29672	µm	Spot	Position	1		DAPI-	21766
88942.4	39985	5.19157	µm	Spot	Position	1		DAPI-	21767
88944.6	39985.1	5.29157	µm	Spot	Position	1		DAPI-	21768
88948.6	39985.3	5.32316	µm	Spot	Position	1		DAPI-	21769
88946.2	39985.5	5.30136	µm	Spot	Position	1		DAPI-	21770
88944.7	39986.1	5.28055	µm	Spot	Position	1		DAPI-	21771
88952.4	39986	5.35485	µm	Spot	Position	1		DAPI-	21772
88949.6	39986.3	5.31795	µm	Spot	Position	1		DAPI-	21773
88951.2	39986.2	5.34382	µm	Spot	Position	1		DAPI-	21774
88941.9	39986.5	5.20608	µm	Spot	Position	1		DAPI-	21775
88943.2	39986.3	5.24295	µm	Spot	Position	1		DAPI-	21776
88941.6	39987.2	5.19319	µm	Spot	Position	1		DAPI-	21777
88942.8	39987.1	5.23505	µm	Spot	Position	1		DAPI-	21778
88946.8	39987.2	5.30071	µm	Spot	Position	1		DAPI-	21779
88948.3	39987.3	5.33213	µm	Spot	Position	1		DAPI-	21780
88944.8	39987.5	5.27574	µm	Spot	Position	1		DAPI-	21781
88949.4	39987.6	5.33434	µm	Spot	Position	1		DAPI-	21782
88951.4	39987.7	5.3466	µm	Spot	Position	1		DAPI-	21783
88946.1	39988.3	5.29854	µm	Spot	Position	1		DAPI-	21784
88947.3	39988.3	5.32072	µm	Spot	Position	1		DAPI-	21785
88942.3	39988.5	5.22733	µm	Spot	Position	1		DAPI-	21786
88948.5	39988.6	5.33254	µm	Spot	Position	1		DAPI-	21787
88949.4	39988.5	5.32337	µm	Spot	Position	1		DAPI-	21788
88946.9	39989.2	5.3184	µm	Spot	Position	1		DAPI-	21789
88951.4	39989.1	5.35396	µm	Spot	Position	1		DAPI-	21790
88949.1	39989.7	5.33184	µm	Spot	Position	1		DAPI-	21791
88944.7	39990	5.2806	µm	Spot	Position	1		DAPI-	21792
88942.8	39990.4	5.23637	µm	Spot	Position	1		DAPI-	21793
88947.1	39990.4	5.31029	µm	Spot	Position	1		DAPI-	21794
88950	39990.7	5.34145	µm	Spot	Position	1		DAPI-	21795
88945.8	39991	5.30322	µm	Spot	Position	1		DAPI-	21796
88941.4	39991.4	5.18574	µm	Spot	Position	1		DAPI-	21797
88944.8	39991.4	5.28107	µm	Spot	Position	1		DAPI-	21798
88951.9	39991.5	5.34956	µm	Spot	Position	1		DAPI-	21799
88940.4	39992.1	5.15306	µm	Spot	Position	1		DAPI-	21800
88949.2	39991.9	5.3448	µm	Spot	Position	1		DAPI-	21801
88946.1	39992.2	5.31599	µm	Spot	Position	1		DAPI-	21802
88948.2	39992.2	5.33746	µm	Spot	Position	1		DAPI-	21803
88945.1	39992.4	5.29774	µm	Spot	Position	1		DAPI-	21804
88951.8	39992.4	5.34965	µm	Spot	Position	1		DAPI-	21805
88942.2	39992.8	5.23763	µm	Spot	Position	1		DAPI-	21806
88950.7	39992.7	5.34742	µm	Spot	Position	1		DAPI-	21807
88940.6	39992.9	5.14053	µm	Spot	Position	1		DAPI-	21808
88947.1	39993.5	5.30566	µm	Spot	Position	1		DAPI-	21809
88948.8	39993.6	5.34634	µm	Spot	Position	1		DAPI-	21810
88943.4	39993.9	5.30136	µm	Spot	Position	1		DAPI-	21811
88939.8	39994.2	5.13597	µm	Spot	Position	1		DAPI-	21812
88940.8	39994.5	5.19975	µm	Spot	Position	1		DAPI-	21813
88949.5	39994.6	5.33428	µm	Spot	Position	1		DAPI-	21814
88943.3	39994.7	5.29339	µm	Spot	Position	1		DAPI-	21815
88944.7	39994.9	5.31014	µm	Spot	Position	1		DAPI-	21816
88951.4	39994.9	5.3554	µm	Spot	Position	1		DAPI-	21817
88940	39995.5	5.17734	µm	Spot	Position	1		DAPI-	21818
88947.4	39995.6	5.33298	µm	Spot	Position	1		DAPI-	21819
88949.4	39995.6	5.33977	µm	Spot	Position	1		DAPI-	21820
88942.2	39996	5.26829	µm	Spot	Position	1		DAPI-	21821
88952.3	39996	5.3755	µm	Spot	Position	1		DAPI-	21822
88944.5	39996.1	5.27705	µm	Spot	Position	1		DAPI-	21823
88946.6	39996.2	5.31321	µm	Spot	Position	1		DAPI-	21824
88949.4	39996.4	5.32477	µm	Spot	Position	1		DAPI-	21825
88939.7	39996.7	5.10945	µm	Spot	Position	1		DAPI-	21826
88948.8	39997	5.34165	µm	Spot	Position	1		DAPI-	21827
88946.1	39997.1	5.32746	µm	Spot	Position	1		DAPI-	21828
88942.1	39997.4	5.25884	µm	Spot	Position	1		DAPI-	21829
88944.6	39997.4	5.29001	µm	Spot	Position	1		DAPI-	21830
88947.2	39997.4	5.32316	µm	Spot	Position	1		DAPI-	21831
88949.5	39997.8	5.33382	µm	Spot	Position	1		DAPI-	21832
88943.3	39998.2	5.30006	µm	Spot	Position	1		DAPI-	21833
88948.6	39998.2	5.34142	µm	Spot	Position	1		DAPI-	21834
88940.3	39998.4	5.18511	µm	Spot	Position	1		DAPI-	21835
88952	39998.5	5.3663	µm	Spot	Position	1		DAPI-	21836
88946.9	39998.7	5.3353	µm	Spot	Position	1		DAPI-	21837
88940	39999.2	5.17791	µm	Spot	Position	1		DAPI-	21838
88950	39999.3	5.35115	µm	Spot	Position	1		DAPI-	21839
88943	39999.4	5.28249	µm	Spot	Position	1		DAPI-	21840
88942.1	39999.6	5.25104	µm	Spot	Position	1		DAPI-	21841
88948.4	39999.6	5.35121	µm	Spot	Position	1		DAPI-	21842
88951	39999.6	5.35205	µm	Spot	Position	1		DAPI-	21843
88944.7	39999.7	5.31321	µm	Spot	Position	1		DAPI-	21844
88938.5	40000.3	5.11518	µm	Spot	Position	1		DAPI-	21845
88940.5	40000.5	5.19827	µm	Spot	Position	1		DAPI-	21846
88946.6	40000.4	5.33531	µm	Spot	Position	1		DAPI-	21847
88949.6	40000.4	5.33362	µm	Spot	Position	1		DAPI-	21848
88941.9	40000.8	5.24867	µm	Spot	Position	1		DAPI-	21849
88951.9	40000.7	5.35593	µm	Spot	Position	1		DAPI-	21850
88943.7	40000.9	5.29694	µm	Spot	Position	1		DAPI-	21851
88944.6	40001.2	5.28789	µm	Spot	Position	1		DAPI-	21852
88951.7	40001.5	5.3641	µm	Spot	Position	1		DAPI-	21853
88949.2	40001.8	5.35266	µm	Spot	Position	1		DAPI-	21854
88940	40002.1	5.17195	µm	Spot	Position	1		DAPI-	21855
88942.4	40002.1	5.28305	µm	Spot	Position	1		DAPI-	21856
88943.4	40002.1	5.2907	µm	Spot	Position	1		DAPI-	21857
88944.9	40002.1	5.32404	µm	Spot	Position	1		DAPI-	21858
88938.4	40002.4	5.10467	µm	Spot	Position	1		DAPI-	21859
88950.9	40002.7	5.36722	µm	Spot	Position	1		DAPI-	21860
88942.4	40003	5.29133	µm	Spot	Position	1		DAPI-	21861
88940	40003.1	5.20234	µm	Spot	Position	1		DAPI-	21862
88947	40003.1	5.32306	µm	Spot	Position	1		DAPI-	21863
88944	40003.8	5.32933	µm	Spot	Position	1		DAPI-	21864
88946.1	40003.7	5.32401	µm	Spot	Position	1		DAPI-	21865
88939.9	40004.1	5.20013	µm	Spot	Position	1		DAPI-	21866
88947.8	40004	5.326	µm	Spot	Position	1		DAPI-	21867
88941.3	40004.4	5.25628	µm	Spot	Position	1		DAPI-	21868
88949.7	40004.5	5.354	µm	Spot	Position	1		DAPI-	21869
88947.2	40005.1	5.34513	µm	Spot	Position	1		DAPI-	21870
88951.7	40005.4	5.37719	µm	Spot	Position	1		DAPI-	21871
88944.7	40005.7	5.30586	µm	Spot	Position	1		DAPI-	21872
88941	40006.1	5.24796	µm	Spot	Position	1		DAPI-	21873
88949.4	40006.2	5.36117	µm	Spot	Position	1		DAPI-	21874
88947.6	40006.4	5.34924	µm	Spot	Position	1		DAPI-	21875
88939.7	40006.8	5.21605	µm	Spot	Position	1		DAPI-	21876
[truncated: 1,908 more rows]

## Sheet: Sample 2-Slit2+DCX_Position - A
AC338 Slit2 555DCX 488_R_[ii19_TileScan_1_Merged_Image_20]_Position
Position
====================
Position X	Position Y	Position Z	Unit	Category	Collection	Time	DCX	dapi	ID
46044.9	43083.9	1.41436	µm	Spot	Position	1		DAPI-	3
46048.6	43079.9	1.9639	µm	Spot	Position	1		DAPI-	4
46054.9	43077.5	2.22228	µm	Spot	Position	1		DAPI-	6
46053.2	43080	3.23476	µm	Spot	Position	1		DAPI-	13
46044.9	43105	2.57705	µm	Spot	Position	1		DAPI-	14
46059.7	43072.2	3.71554	µm	Spot	Position	1		DAPI-	25
46100.4	43479.9	5.9199	µm	Spot	Position	1		DAPI-	73
46238.5	43941	6.30799	µm	Spot	Position	1		DAPI-	110
46254.4	43894.3	8.08772	µm	Spot	Position	1		DAPI-	155
46045.4	43095.9	0.1501	µm	Spot	Position	1	DCX+	DAPI+	1
46041.5	43143.4	2.17213	µm	Spot	Position	1	DCX+	DAPI+	9
46052.3	43060.8	3.20312	µm	Spot	Position	1	DCX+	DAPI+	11
46057.5	43074.7	3.03993	µm	Spot	Position	1	DCX+	DAPI+	12
46043.6	43161	2.42335	µm	Spot	Position	1	DCX+	DAPI+	16
46097.2	43444.9	2.76162	µm	Spot	Position	1	DCX+	DAPI+	17
46149.5	43582.2	3.16581	µm	Spot	Position	1	DCX+	DAPI+	18
46142.9	43568.7	3.34429	µm	Spot	Position	1	DCX+	DAPI+	19
46022.6	43037.1	3.65127	µm	Spot	Position	1	DCX+	DAPI+	21
46022	43032.7	4.41573	µm	Spot	Position	1	DCX+	DAPI+	22
46025.5	43069.4	4.065	µm	Spot	Position	1	DCX+	DAPI+	23
46049.4	43208.1	4.78284	µm	Spot	Position	1	DCX+	DAPI+	31
46060.4	43274.9	3.93438	µm	Spot	Position	1	DCX+	DAPI+	32
46132.1	43545.6	4.76829	µm	Spot	Position	1	DCX+	DAPI+	34
46143.7	43573	4.74464	µm	Spot	Position	1	DCX+	DAPI+	35
46006.6	42946.2	5.11311	µm	Spot	Position	1	DCX+	DAPI+	37
46000.3	42938.8	5.46059	µm	Spot	Position	1	DCX+	DAPI+	38
46003.8	42932.4	5.73596	µm	Spot	Position	1	DCX+	DAPI+	39
46017	43039.8	5.30399	µm	Spot	Position	1	DCX+	DAPI+	43
46041.5	43063	5.07693	µm	Spot	Position	1	DCX+	DAPI+	46
46043.1	43180.1	5.28189	µm	Spot	Position	1	DCX+	DAPI+	58
46051.6	43213.2	5.27741	µm	Spot	Position	1	DCX+	DAPI+	59
46058.4	43364.4	5.13765	µm	Spot	Position	1	DCX+	DAPI+	64
46062.6	43376	5.42654	µm	Spot	Position	1	DCX+	DAPI+	66
46109	43482.2	5.64947	µm	Spot	Position	1	DCX+	DAPI+	72
46124.2	43514.2	5.1382	µm	Spot	Position	1	DCX+	DAPI+	75
46000.2	42902.3	6.10163	µm	Spot	Position	1	DCX+	DAPI+	80
46068.5	43311.3	6.18413	µm	Spot	Position	1	DCX+	DAPI+	90
46094	43444.6	6.06328	µm	Spot	Position	1	DCX+	DAPI+	97
46109.5	43492.8	6.37409	µm	Spot	Position	1	DCX+	DAPI+	99
46219.4	43805.4	6.53921	µm	Spot	Position	1	DCX+	DAPI+	104
46215	43789.3	7.13376	µm	Spot	Position	1	DCX+	DAPI+	105
46239	43854.5	6.1749	µm	Spot	Position	1	DCX+	DAPI+	106
46230.9	43847.9	6.93355	µm	Spot	Position	1	DCX+	DAPI+	107
46221.3	43968.1	7.03816	µm	Spot	Position	1	DCX+	DAPI+	112
46216.6	44002.6	6.07215	µm	Spot	Position	1	DCX+	DAPI+	113
46223.9	43986.7	6.34488	µm	Spot	Position	1	DCX+	DAPI+	114
46192.9	44043.9	6.59856	µm	Spot	Position	1	DCX+	DAPI+	120
46191.7	44017.8	6.66804	µm	Spot	Position	1	DCX+	DAPI+	122
46135.1	44111.6	6.59543	µm	Spot	Position	1	DCX+	DAPI+	126
46139.3	44121.4	6.84566	µm	Spot	Position	1	DCX+	DAPI+	128
46071.4	44178	6.99202	µm	Spot	Position	1	DCX+	DAPI+	131
46040.7	44219	6.32907	µm	Spot	Position	1	DCX+	DAPI+	132
46032.8	44222.6	7.0681	µm	Spot	Position	1	DCX+	DAPI+	133
45822.3	44325.8	6.34368	µm	Spot	Position	1	DCX+	DAPI+	138
46177.1	43676.7	7.26012	µm	Spot	Position	1	DCX+	DAPI+	142
46197.7	43736.6	8.14735	µm	Spot	Position	1	DCX+	DAPI+	147
46207.1	43776	8.33652	µm	Spot	Position	1	DCX+	DAPI+	149
46207.4	43779.9	8.34231	µm	Spot	Position	1	DCX+	DAPI+	150
46218.3	43813	7.65632	µm	Spot	Position	1	DCX+	DAPI+	151
46213.8	43804.9	8.05269	µm	Spot	Position	1	DCX+	DAPI+	152
46219.5	43816	8.1498	µm	Spot	Position	1	DCX+	DAPI+	153
46236.6	43878.7	8.39089	µm	Spot	Position	1	DCX+	DAPI+	154
46205.6	44002.9	7.27513	µm	Spot	Position	1	DCX+	DAPI+	158
46192.4	44011.9	7.51515	µm	Spot	Position	1	DCX+	DAPI+	159
46207.3	44008.8	8.09069	µm	Spot	Position	1	DCX+	DAPI+	160
46206.3	44050.8	7.4739	µm	Spot	Position	1	DCX+	DAPI+	165
46190.1	44030.8	7.76273	µm	Spot	Position	1	DCX+	DAPI+	166
46201.8	44031	7.6421	µm	Spot	Position	1	DCX+	DAPI+	167
46187.5	44046.1	7.52382	µm	Spot	Position	1	DCX+	DAPI+	168
46188.8	44026.4	8.04643	µm	Spot	Position	1	DCX+	DAPI+	169
46174	44058.9	8.08773	µm	Spot	Position	1	DCX+	DAPI+	170
46187.4	44018.6	8.19147	µm	Spot	Position	1	DCX+	DAPI+	171
46208.1	44021.3	8.35569	µm	Spot	Position	1	DCX+	DAPI+	172
46187.2	44028.8	8.13625	µm	Spot	Position	1	DCX+	DAPI+	173
46214.1	44035.8	7.21506	µm	Spot	Position	1	DCX+	DAPI+	174
46162.5	44089.9	7.613	µm	Spot	Position	1	DCX+	DAPI+	175
46157.6	44082.8	7.8893	µm	Spot	Position	1	DCX+	DAPI+	176
46149.1	44087.1	7.92217	µm	Spot	Position	1	DCX+	DAPI+	177
46069.6	44176	7.25301	µm	Spot	Position	1	DCX+	DAPI+	183
46066.8	44177.4	8.25613	µm	Spot	Position	1	DCX+	DAPI+	185
46073.9	44172.8	7.92449	µm	Spot	Position	1	DCX+	DAPI+	188
46012.7	44221	7.24416	µm	Spot	Position	1	DCX+	DAPI+	191
46045.4	44203.4	7.74715	µm	Spot	Position	1	DCX+	DAPI+	193
45876.4	44290	8.25422	µm	Spot	Position	1	DCX+	DAPI+	195
45917.2	44293.8	7.59922	µm	Spot	Position	1	DCX+	DAPI+	197
45928.6	44292.8	7.83692	µm	Spot	Position	1	DCX+	DAPI+	199
45947.9	44264.5	8.30701	µm	Spot	Position	1	DCX+	DAPI+	204
45725.3	44336.2	7.763	µm	Spot	Position	1	DCX+	DAPI+	206
45820.4	44312.5	7.79821	µm	Spot	Position	1	DCX+	DAPI+	210
45838.1	44312.8	8.18224	µm	Spot	Position	1	DCX+	DAPI+	213
45844.9	44316.2	7.70458	µm	Spot	Position	1	DCX+	DAPI+	216
45902.9	44299.4	7.9099	µm	Spot	Position	1	DCX+	DAPI+	219
46188.4	44018.5	8.56256	µm	Spot	Position	1	DCX+	DAPI+	225
46200.5	44054.5	8.42448	µm	Spot	Position	1	DCX+	DAPI+	226
46148.7	44095.8	9.28482	µm	Spot	Position	1	DCX+	DAPI+	228
46096.4	44155.1	8.82589	µm	Spot	Position	1	DCX+	DAPI+	231
46061.4	44189.5	8.56357	µm	Spot	Position	1	DCX+	DAPI+	233
45887.5	44291.2	8.45317	µm	Spot	Position	1	DCX+	DAPI+	238
45947.4	44266.9	8.45595	µm	Spot	Position	1	DCX+	DAPI+	239
45964.4	44269.8	9.23367	µm	Spot	Position	1	DCX+	DAPI+	241
45712.3	44337.5	8.48181	µm	Spot	Position	1	DCX+	DAPI+	244
45862.5	44304.4	8.67572	µm	Spot	Position	1	DCX+	DAPI+	247
45747.4	44346.4	9.25274	µm	Spot	Position	1	DCX+	DAPI+	249
46041.3	43089.6	1.90343	µm	Spot	Position	1	DCX-	DAPI+	5
46042.6	43098.9	1.27152	µm	Spot	Position	1	DCX-	DAPI+	7
46036	43109.8	2.15614	µm	Spot	Position	1	DCX-	DAPI+	8
46024.4	43035.8	3.46162	µm	Spot	Position	1	DCX-	DAPI+	10
46037.3	43096	3.57649	µm	Spot	Position	1	DCX-	DAPI+	15
46004.9	42928.8	4.02199	µm	Spot	Position	1	DCX-	DAPI+	20
46055.5	43076.2	4.06888	µm	Spot	Position	1	DCX-	DAPI+	26
46054.3	43071	4.42238	µm	Spot	Position	1	DCX-	DAPI+	27
46054.3	43069.7	4.66658	µm	Spot	Position	1	DCX-	DAPI+	28
46047.7	43073.3	4.70067	µm	Spot	Position	1	DCX-	DAPI+	29
46036	43097.6	3.62721	µm	Spot	Position	1	DCX-	DAPI+	30
46067.2	43341.8	4.39202	µm	Spot	Position	1	DCX-	DAPI+	33
45992	42916.5	5.10198	µm	Spot	Position	1	DCX-	DAPI+	36
46014.1	42933.1	5.89228	µm	Spot	Position	1	DCX-	DAPI+	40
46010.2	42989.9	5.24816	µm	Spot	Position	1	DCX-	DAPI+	41
46003.8	42983.1	5.73205	µm	Spot	Position	1	DCX-	DAPI+	42
46028.6	43032.3	5.45244	µm	Spot	Position	1	DCX-	DAPI+	44
46029.6	43046	5.98302	µm	Spot	Position	1	DCX-	DAPI+	45
46053.2	43058.6	5.54689	µm	Spot	Position	1	DCX-	DAPI+	47
46035.6	43067.1	5.48321	µm	Spot	Position	1	DCX-	DAPI+	48
46055.8	43059	5.79409	µm	Spot	Position	1	DCX-	DAPI+	49
46037.3	43098.4	4.90338	µm	Spot	Position	1	DCX-	DAPI+	50
46038.6	43130.1	5.26216	µm	Spot	Position	1	DCX-	DAPI+	51
46035.2	43107.7	5.57331	µm	Spot	Position	1	DCX-	DAPI+	52
46031.2	43098.4	5.90169	µm	Spot	Position	1	DCX-	DAPI+	53
46033.6	43141.3	5.15169	µm	Spot	Position	1	DCX-	DAPI+	56
46038.5	43141.2	5.11951	µm	Spot	Position	1	DCX-	DAPI+	57
46054.4	43219.4	5.37879	µm	Spot	Position	1	DCX-	DAPI+	60
46053	43245.7	4.97817	µm	Spot	Position	1	DCX-	DAPI+	61
46052.5	43233.7	5.51046	µm	Spot	Position	1	DCX-	DAPI+	62
46052.1	43259.3	5.78868	µm	Spot	Position	1	DCX-	DAPI+	63
46077.9	43402.2	5.71334	µm	Spot	Position	1	DCX-	DAPI+	67
46096.2	43456.5	5.38381	µm	Spot	Position	1	DCX-	DAPI+	68
46098.8	43457.3	5.2467	µm	Spot	Position	1	DCX-	DAPI+	69
46092.2	43451.9	5.4461	µm	Spot	Position	1	DCX-	DAPI+	70
46100.6	43470.6	5.6494	µm	Spot	Position	1	DCX-	DAPI+	71
46147	43594.1	5.16256	µm	Spot	Position	1	DCX-	DAPI+	77
46203.5	43775	5.89887	µm	Spot	Position	1	DCX-	DAPI+	79
45989.9	42923	6.30634	µm	Spot	Position	1	DCX-	DAPI+	81
46036	43043.7	6.07842	µm	Spot	Position	1	DCX-	DAPI+	82
46028.5	43053.8	6.0312	µm	Spot	Position	1	DCX-	DAPI+	84
46043	43077.8	6.04584	µm	Spot	Position	1	DCX-	DAPI+	85
46032.5	43082.2	6.20816	µm	Spot	Position	1	DCX-	DAPI+	86
46039.8	43131.4	6.03389	µm	Spot	Position	1	DCX-	DAPI+	87
46046.9	43179.4	6.04163	µm	Spot	Position	1	DCX-	DAPI+	89
46068.3	43342.1	6.21512	µm	Spot	Position	1	DCX-	DAPI+	91
46066.3	43375.3	6.36467	µm	Spot	Position	1	DCX-	DAPI+	92
46073.2	43392.9	6.18406	µm	Spot	Position	1	DCX-	DAPI+	93
46079.4	43404.4	6.20089	µm	Spot	Position	1	DCX-	DAPI+	94
46074.9	43401.2	6.86065	µm	Spot	Position	1	DCX-	DAPI+	95
46095.6	43438.9	6.07235	µm	Spot	Position	1	DCX-	DAPI+	96
46087.1	43423.8	6.55753	µm	Spot	Position	1	DCX-	DAPI+	98
46141.1	43569.3	7.08843	µm	Spot	Position	1	DCX-	DAPI+	102
46200.4	43758	6.7332	µm	Spot	Position	1	DCX-	DAPI+	103
46247.3	43891.4	7.10758	µm	Spot	Position	1	DCX-	DAPI+	108
46237.2	43926.9	6.42025	µm	Spot	Position	1	DCX-	DAPI+	109
46229.9	43950.5	6.96452	µm	Spot	Position	1	DCX-	DAPI+	111
46222.6	43983.1	6.7245	µm	Spot	Position	1	DCX-	DAPI+	115
46222.6	44013.9	6.90639	µm	Spot	Position	1	DCX-	DAPI+	116
46198	44019.9	6.59522	µm	Spot	Position	1	DCX-	DAPI+	118
46209.2	44032	6.58725	µm	Spot	Position	1	DCX-	DAPI+	119
46189.9	44044.9	6.57822	µm	Spot	Position	1	DCX-	DAPI+	121
46211.2	44023.1	6.99839	µm	Spot	Position	1	DCX-	DAPI+	123
46129.6	44106.6	7.15865	µm	Spot	Position	1	DCX-	DAPI+	124
46148.3	44115.9	6.88914	µm	Spot	Position	1	DCX-	DAPI+	127
46145.3	44123.8	6.92058	µm	Spot	Position	1	DCX-	DAPI+	129
45977.3	44261.7	7.11746	µm	Spot	Position	1	DCX-	DAPI+	136
46126.6	43538.4	7.3514	µm	Spot	Position	1	DCX-	DAPI+	139
46140.6	43567.8	7.30162	µm	Spot	Position	1	DCX-	DAPI+	140
46155.4	43630.6	7.47297	µm	Spot	Position	1	DCX-	DAPI+	141
46192.1	43714.6	8.10085	µm	Spot	Position	1	DCX-	DAPI+	144
46203.3	43781.4	8.00861	µm	Spot	Position	1	DCX-	DAPI+	148
46207.6	43982.5	8.12755	µm	Spot	Position	1	DCX-	DAPI+	161
46231.9	44016.3	7.2631	µm	Spot	Position	1	DCX-	DAPI+	162
46218.9	44016.6	8.14921	µm	Spot	Position	1	DCX-	DAPI+	163
46159.6	44081.1	8.35779	µm	Spot	Position	1	DCX-	DAPI+	178
46077.4	44175.4	7.65031	µm	Spot	Position	1	DCX-	DAPI+	187
46008.8	44230.4	8.25696	µm	Spot	Position	1	DCX-	DAPI+	192
45925	44291.9	7.55544	µm	Spot	Position	1	DCX-	DAPI+	196
45933.7	44283.4	7.93557	µm	Spot	Position	1	DCX-	DAPI+	198
45921.9	44287.2	8.20282	µm	Spot	Position	1	DCX-	DAPI+	200
45978.5	44252.2	7.42769	µm	Spot	Position	1	DCX-	DAPI+	201
45977.7	44252.8	7.41562	µm	Spot	Position	1	DCX-	DAPI+	202
45743.7	44327.9	7.22497	µm	Spot	Position	1	DCX-	DAPI+	205
45820.5	44295.8	8.11218	µm	Spot	Position	1	DCX-	DAPI+	212
45868.5	44312	7.38303	µm	Spot	Position	1	DCX-	DAPI+	214
45848.2	44295.4	7.70324	µm	Spot	Position	1	DCX-	DAPI+	215
45723.1	44343.7	8.21126	µm	Spot	Position	1	DCX-	DAPI+	222
46195.3	44015.5	8.66199	µm	Spot	Position	1	DCX-	DAPI+	224
46171.9	44083.3	9.23771	µm	Spot	Position	1	DCX-	DAPI+	229
46134.3	44118.2	8.881	µm	Spot	Position	1	DCX-	DAPI+	232
46064	44197	8.82564	µm	Spot	Position	1	DCX-	DAPI+	234
45967.8	44264.4	9.24274	µm	Spot	Position	1	DCX-	DAPI+	240
46041.8	43092.6	1.10195	µm	Spot	Position	1	DCX+;DCX-	DAPI+;DAPI-	0

## Sheet: Sample 3-Slit2+DCX_Position - A
AC350 Slit2 555 DCX 488_[ii25_TileScan_2_Merged_Image_26]_Position
Position
====================
Position X	Position Y	Position Z	Unit	Category	Collection	Time	DCX	dapi	wedge	ID
96949.2	38058.8	3.57149	µm	Spot	Position	1		DAPI-		22
96950.9	38258	3.40648	µm	Spot	Position	1		DAPI-		23
96948.9	38187.1	4.08101	µm	Spot	Position	1		DAPI-		56
96951.3	38256.9	3.76543	µm	Spot	Position	1		DAPI-		61
96950.1	38258	3.69955	µm	Spot	Position	1		DAPI-		62
96949.6	38257.3	4.06787	µm	Spot	Position	1		DAPI-		63
96949.7	38258.7	3.97338	µm	Spot	Position	1		DAPI-		66
96943.6	38514.9	4.40548	µm	Spot	Position	1		DAPI-		76
96945.7	38515.4	3.82641	µm	Spot	Position	1		DAPI-		78
96945.7	38516.4	4.06492	µm	Spot	Position	1		DAPI-		79
96943.6	38517.2	4.66718	µm	Spot	Position	1		DAPI-		80
96910.8	38003.7	5.94289	µm	Spot	Position	1		DAPI-		114
96915.7	38058.5	5.15259	µm	Spot	Position	1		DAPI-		151
96944.7	38055.2	5.73508	µm	Spot	Position	1		DAPI-		157
96950.3	38189.6	4.91147	µm	Spot	Position	1		DAPI-		177
96943	38203.4	5.8755	µm	Spot	Position	1		DAPI-		184
96944.2	38204.9	5.81276	µm	Spot	Position	1		DAPI-		185
96948.4	38258.3	4.84329	µm	Spot	Position	1		DAPI-		187
96957.4	38259.3	5.00689	µm	Spot	Position	1		DAPI-		188
96956	38258	5.31377	µm	Spot	Position	1		DAPI-		192
96945.5	38253.3	5.82288	µm	Spot	Position	1		DAPI-		194
96945.5	38518.3	5.09286	µm	Spot	Position	1		DAPI-		241
96944.2	38527	5.99333	µm	Spot	Position	1		DAPI-		244
96936.1	38640.1	5.36359	µm	Spot	Position	1		DAPI-		253
96939.8	38693.3	5.33179	µm	Spot	Position	1		DAPI-		263
96941.3	38695.2	5.23139	µm	Spot	Position	1		DAPI-		264
96896.7	38009.1	6.24977	µm	Spot	Position	1		DAPI-		326
96941.3	38022.7	6.25284	µm	Spot	Position	1		DAPI-		329
96904.8	38043.9	7.17937	µm	Spot	Position	1		DAPI-		335
96941.8	38204.4	6.15431	µm	Spot	Position	1		DAPI-		440
96940.7	38508.8	6.97706	µm	Spot	Position	1		DAPI-		563
96941.7	38554	6.09835	µm	Spot	Position	1		DAPI-		575
96921.6	38648.9	6.88163	µm	Spot	Position	1		DAPI-		625
96940.2	38680.1	6.41043	µm	Spot	Position	1		DAPI-		648
96914.7	38692.1	6.55332	µm	Spot	Position	1		DAPI-		652
96940.8	38676.2	6.74853	µm	Spot	Position	1		DAPI-		658
96941.2	38696.9	6.8305	µm	Spot	Position	1		DAPI-		660
96909.1	38703.1	7.03936	µm	Spot	Position	1		DAPI-		678
96902.4	38777.4	7.17307	µm	Spot	Position	1		DAPI-		685
96898.9	38801.5	7.09294	µm	Spot	Position	1		DAPI-		692
96879.7	38030.5	7.40064	µm	Spot	Position	1		DAPI-		782
96879.2	38036.5	7.33824	µm	Spot	Position	1		DAPI-		783
96888.6	38021.5	8.06371	µm	Spot	Position	1		DAPI-		788
96941.1	38234.2	7.44618	µm	Spot	Position	1		DAPI-		967
96954.7	38196.4	7.84194	µm	Spot	Position	1		DAPI-		975
96951	38366.9	7.56386	µm	Spot	Position	1		DAPI-		1111
96941.6	38519.7	7.37624	µm	Spot	Position	1		DAPI-		1275
96932.9	38527.1	7.41014	µm	Spot	Position	1		DAPI-		1276
96927.3	38575.4	7.44725	µm	Spot	Position	1		DAPI-		1327
96934.1	38596.3	7.27275	µm	Spot	Position	1		DAPI-		1331
96933	38595.2	7.64055	µm	Spot	Position	1		DAPI-		1341
96932	38595.9	7.60968	µm	Spot	Position	1		DAPI-		1342
96938.5	38676.6	7.52792	µm	Spot	Position	1		DAPI-		1422
96939.5	38685.4	7.59254	µm	Spot	Position	1		DAPI-		1424
96941.7	38672.6	8.13801	µm	Spot	Position	1		DAPI-		1437
96907.5	38736.1	7.27892	µm	Spot	Position	1		DAPI-		1458
96908.8	38747.8	7.57064	µm	Spot	Position	1		DAPI-		1477
96904.5	38761.6	8.22552	µm	Spot	Position	1		DAPI-		1479
96904.1	38766.6	8.12404	µm	Spot	Position	1		DAPI-		1480
96888.3	38860	7.92324	µm	Spot	Position	1		DAPI-		1517
96913.9	39006.7	7.95475	µm	Spot	Position	1		DAPI-		1552
96896.9	38020.6	8.60794	µm	Spot	Position	1		DAPI-		1689
96948.7	38264.4	8.61376	µm	Spot	Position	1		DAPI-		2042
96952.6	38388.3	8.68628	µm	Spot	Position	1		DAPI-		2255
96953.9	38471.2	8.85946	µm	Spot	Position	1		DAPI-		2387
96948.4	38509.8	9.32407	µm	Spot	Position	1		DAPI-		2394
96939.1	38576.3	8.47284	µm	Spot	Position	1		DAPI-		2492
96932.8	38629.6	9.2797	µm	Spot	Position	1		DAPI-		2558
96925.7	38756.8	8.61333	µm	Spot	Position	1		DAPI-		2693
96928.4	38755	9.28511	µm	Spot	Position	1		DAPI-		2703
96918.4	38800.5	9.09564	µm	Spot	Position	1		DAPI-		2761
96911.4	38883.1	9.57297	µm	Spot	Position	1		DAPI-		2807
96920.6	38886.1	9.44972	µm	Spot	Position	1		DAPI-		2808
96932.2	38189.2	10.2231	µm	Spot	Position	1		DAPI-		3499
96953.3	38193.1	10.1922	µm	Spot	Position	1		DAPI-		3508
96946	38341.1	9.70939	µm	Spot	Position	1		DAPI-		3844
96953.2	38364.4	10.3366	µm	Spot	Position	1		DAPI-		3851
96908.3	38738.4	9.76417	µm	Spot	Position	1		DAPI-		4500
96917.3	38711.1	10.3222	µm	Spot	Position	1		DAPI-		4508
96895.3	38889.9	10.5462	µm	Spot	Position	1		DAPI-		4843
96925.1	38892.2	9.90526	µm	Spot	Position	1		DAPI-		4853
96952.6	38249.2	11.6701	µm	Spot	Position	1		DAPI-		6230
96959.1	38357.4	11.8509	µm	Spot	Position	1		DAPI-		6370
96926.7	38779.4	11.1634	µm	Spot	Position	1		DAPI-		7073
96892	38900	11.7361	µm	Spot	Position	1		DAPI-		7367
96916.9	38906.4	10.8825	µm	Spot	Position	1		DAPI-		7371
96944.2	38370.9	12.3728	µm	Spot	Position	1		DAPI-		8919
96892	38918.7	13.0391	µm	Spot	Position	1		DAPI-		9600
96914.7	39026.4	2.36275	µm	Spot	Position	1	S100B+	DAPI+		11
96942.6	38060.3	4.58145	µm	Spot	Position	1	S100B+	DAPI+		51
96931.9	38682.9	3.69959	µm	Spot	Position	1	S100B+	DAPI+		92
96936.2	38668.1	4.2959	µm	Spot	Position	1	S100B+	DAPI+		101
96916.4	39021.6	4.06632	µm	Spot	Position	1	S100B+	DAPI+		109
96926.4	38050.3	5.40506	µm	Spot	Position	1	S100B+	DAPI+		130
96939	38052.4	5.59266	µm	Spot	Position	1	S100B+	DAPI+		131
96945	38037.1	5.0611	µm	Spot	Position	1	S100B+	DAPI+		133
96948.1	38040.4	5.82305	µm	Spot	Position	1	S100B+	DAPI+		134
96955.9	38266.7	5.75813	µm	Spot	Position	1	S100B+	DAPI+		195
96937.4	38671	5.29141	µm	Spot	Position	1	S100B+	DAPI+		262
96933.3	38678.2	5.45607	µm	Spot	Position	1	S100B+	DAPI+		269
96937.8	38030.7	6.28646	µm	Spot	Position	1	S100B+	DAPI+		330
96938.3	38029	6.65069	µm	Spot	Position	1	S100B+	DAPI+		332
96928.2	38059.9	6.42544	µm	Spot	Position	1	S100B+	DAPI+		362
96937.2	38065.3	6.75235	µm	Spot	Position	1	S100B+	DAPI+		364
96932.8	38073	6.66399	µm	Spot	Position	1	S100B+	DAPI+		365
96953.7	38267.9	6.54466	µm	Spot	Position	1	S100B+	DAPI+		452
96946.5	38352.4	6.63519	µm	Spot	Position	1	S100B+	DAPI+		512
96942.8	38509.4	6.7776	µm	Spot	Position	1	S100B+	DAPI+		558
96932	38664.8	6.15446	µm	Spot	Position	1	S100B+	DAPI+		641
96933.5	38667.3	6.1511	µm	Spot	Position	1	S100B+	DAPI+		642
96924.3	38659.6	6.53008	µm	Spot	Position	1	S100B+	DAPI+		644
96938	38690.1	7.17704	µm	Spot	Position	1	S100B+	DAPI+		664
96893.1	39011.9	7.11962	µm	Spot	Position	1	S100B+	DAPI+		712
96889.8	38037.2	7.44944	µm	Spot	Position	1	S100B+	DAPI+		784
96877.4	38027.6	7.87836	µm	Spot	Position	1	S100B+	DAPI+		789
96876.7	38034.5	7.95294	µm	Spot	Position	1	S100B+	DAPI+		790
96888.5	38036.9	7.98181	µm	Spot	Position	1	S100B+	DAPI+		791
96947.8	38035.5	7.66843	µm	Spot	Position	1	S100B+	DAPI+		805
96941.5	38062.7	7.55507	µm	Spot	Position	1	S100B+	DAPI+		835
96926.3	38068.6	7.84601	µm	Spot	Position	1	S100B+	DAPI+		840
96933	38068.9	8.35635	µm	Spot	Position	1	S100B+	DAPI+		843
96939.3	38157.4	7.21344	µm	Spot	Position	1	S100B+	DAPI+		914
96942.7	38150.4	8.17098	µm	Spot	Position	1	S100B+	DAPI+		927
96945.1	38157.4	8.02184	µm	Spot	Position	1	S100B+	DAPI+		934
96944.8	38178.1	8.2132	µm	Spot	Position	1	S100B+	DAPI+		938
96934.9	38205	7.21254	µm	Spot	Position	1	S100B+	DAPI+		966
96943.5	38197.2	7.98572	µm	Spot	Position	1	S100B+	DAPI+		969
96952	38244.9	8.37896	µm	Spot	Position	1	S100B+	DAPI+		1021
96951.2	38269.7	8.17613	µm	Spot	Position	1	S100B+	DAPI+		1023
96948.3	38303.4	7.39176	µm	Spot	Position	1	S100B+	DAPI+		1064
96954.6	38318.7	8.0539	µm	Spot	Position	1	S100B+	DAPI+		1066
96945.9	38352.4	7.40657	µm	Spot	Position	1	S100B+	DAPI+		1108
96948.2	38507.6	8.17316	µm	Spot	Position	1	S100B+	DAPI+		1251
96923.8	38629.7	8.0419	µm	Spot	Position	1	S100B+	DAPI+		1384
96934.5	38659.8	7.50002	µm	Spot	Position	1	S100B+	DAPI+		1410
96925.7	38661.3	7.78191	µm	Spot	Position	1	S100B+	DAPI+		1418
96933.9	38691.1	7.73391	µm	Spot	Position	1	S100B+	DAPI+		1425
96933	38695.9	7.61791	µm	Spot	Position	1	S100B+	DAPI+		1426
96938.2	38698.8	7.70043	µm	Spot	Position	1	S100B+	DAPI+		1427
96931.2	38700.2	7.59648	µm	Spot	Position	1	S100B+	DAPI+		1429
96936.8	38671.5	7.99875	µm	Spot	Position	1	S100B+	DAPI+		1431
96918.3	39020.6	7.45291	µm	Spot	Position	1	S100B+	DAPI+		1549
96917.2	38007	8.82251	µm	Spot	Position	1	S100B+	DAPI+		1654
96902.4	37997.3	9.58807	µm	Spot	Position	1	S100B+	DAPI+		1657
96911.6	38007.4	9.54599	µm	Spot	Position	1	S100B+	DAPI+		1659
96895	38019.3	9.08291	µm	Spot	Position	1	S100B+	DAPI+		1691
96890.5	38024.5	9.19912	µm	Spot	Position	1	S100B+	DAPI+		1692
96933.2	38022.5	8.93028	µm	Spot	Position	1	S100B+	DAPI+		1694
96916.7	38022.1	9.16096	µm	Spot	Position	1	S100B+	DAPI+		1695
96933.3	38043.7	9.08925	µm	Spot	Position	1	S100B+	DAPI+		1696
96938.2	38017.8	9.32003	µm	Spot	Position	1	S100B+	DAPI+		1698
96903.5	38025.6	9.59499	µm	Spot	Position	1	S100B+	DAPI+		1699
96921.9	38026.6	9.44526	µm	Spot	Position	1	S100B+	DAPI+		1700
96945.2	38042.4	9.00489	µm	Spot	Position	1	S100B+	DAPI+		1701
96945.3	38036.3	9.60417	µm	Spot	Position	1	S100B+	DAPI+		1703
96933.8	38068.3	8.56915	µm	Spot	Position	1	S100B+	DAPI+		1746
96928	38071.3	9.11056	µm	Spot	Position	1	S100B+	DAPI+		1751
96923.6	38071.6	9.50161	µm	Spot	Position	1	S100B+	DAPI+		1755
96926.4	38071.9	9.47117	µm	Spot	Position	1	S100B+	DAPI+		1756
96946.7	38057.2	9.2431	µm	Spot	Position	1	S100B+	DAPI+		1762
96943.1	38127.6	9.17551	µm	Spot	Position	1	S100B+	DAPI+		1809
96932	38154	8.96352	µm	Spot	Position	1	S100B+	DAPI+		1868
96939	38170.2	9.23965	µm	Spot	Position	1	S100B+	DAPI+		1873
96949.1	38169.5	9.03438	µm	Spot	Position	1	S100B+	DAPI+		1882
96946.8	38234.5	9.1294	µm	Spot	Position	1	S100B+	DAPI+		1966
96955.9	38236.9	9.01587	µm	Spot	Position	1	S100B+	DAPI+		1967
96951.8	38208.2	9.32921	µm	Spot	Position	1	S100B+	DAPI+		1968
96957.4	38271.3	8.56128	µm	Spot	Position	1	S100B+	DAPI+		2043
96949.9	38270	8.9292	µm	Spot	Position	1	S100B+	DAPI+		2045
96952.2	38291.7	8.44823	µm	Spot	Position	1	S100B+	DAPI+		2104
96952.2	38303.8	8.827	µm	Spot	Position	1	S100B+	DAPI+		2107
96953.3	38330.6	8.7491	µm	Spot	Position	1	S100B+	DAPI+		2110
96956.3	38289.7	9.42841	µm	Spot	Position	1	S100B+	DAPI+		2115
96948.9	38499.8	9.26574	µm	Spot	Position	1	S100B+	DAPI+		2390
96939.6	38534.1	8.82357	µm	Spot	Position	1	S100B+	DAPI+		2435
96926.9	38634.2	8.79572	µm	Spot	Position	1	S100B+	DAPI+		2551
96928.6	38630.4	9.41993	µm	Spot	Position	1	S100B+	DAPI+		2562
96923.8	38732.6	9.17404	µm	Spot	Position	1	S100B+	DAPI+		2659
96925.2	38726.9	9.51605	µm	Spot	Position	1	S100B+	DAPI+		2664
96920.8	38797.3	8.81048	µm	Spot	Position	1	S100B+	DAPI+		2757
96912.7	38918.8	9.26963	µm	Spot	Position	1	S100B+	DAPI+		2873
96920.2	38952.2	9.25357	µm	Spot	Position	1	S100B+	DAPI+		2916
96909.3	38958.8	9.31291	µm	Spot	Position	1	S100B+	DAPI+		2917
96905.6	39015.6	9.1754	µm	Spot	Position	1	S100B+	DAPI+		2941
96904.3	39020.3	9.56574	µm	Spot	Position	1	S100B+	DAPI+		2943
96926.5	38006.9	10.6506	µm	Spot	Position	1	S100B+	DAPI+		3254
96895	38026.5	9.87692	µm	Spot	Position	1	S100B+	DAPI+		3288
96931.8	38010	9.82045	µm	Spot	Position	1	S100B+	DAPI+		3294
96914.8	38043.8	9.73359	µm	Spot	Position	1	S100B+	DAPI+		3295
96943.9	38014.4	9.92723	µm	Spot	Position	1	S100B+	DAPI+		3297
96943.5	38052.1	10.3175	µm	Spot	Position	1	S100B+	DAPI+		3299
96948.6	38040.7	10.211	µm	Spot	Position	1	S100B+	DAPI+		3304
96943	38058.6	10.6128	µm	Spot	Position	1	S100B+	DAPI+		3354
96941.7	38111.2	9.73159	µm	Spot	Position	1	S100B+	DAPI+		3412
96941.2	38109.9	10.6419	µm	Spot	Position	1	S100B+	DAPI+		3427
96949.1	38155.8	9.9838	µm	Spot	Position	1	S100B+	DAPI+		3505
96943.9	38194.2	9.78045	µm	Spot	Position	1	S100B+	DAPI+		3574
96941	38208.1	10.4411	µm	Spot	Position	1	S100B+	DAPI+		3582
96947.8	38202.3	9.8408	µm	Spot	Position	1	S100B+	DAPI+		3586
96952.1	38231.6	9.92733	µm	Spot	Position	1	S100B+	DAPI+		3596
96948.3	38238.8	10.5415	µm	Spot	Position	1	S100B+	DAPI+		3603
96949.4	38272.4	9.63843	µm	Spot	Position	1	S100B+	DAPI+		3692
96942.3	38295.6	10.5265	µm	Spot	Position	1	S100B+	DAPI+		3751
96940.9	38306.4	10.7071	µm	Spot	Position	1	S100B+	DAPI+		3752
96950.7	38302.4	9.65095	µm	Spot	Position	1	S100B+	DAPI+		3755
96948.8	38309.6	9.68436	µm	Spot	Position	1	S100B+	DAPI+		3756
96949.9	38298	10.1804	µm	Spot	Position	1	S100B+	DAPI+		3758
96948.6	38424.9	10.0509	µm	Spot	Position	1	S100B+	DAPI+		4010
96948.1	38430.1	10.0657	µm	Spot	Position	1	S100B+	DAPI+		4011
96956.6	38446.4	10.3136	µm	Spot	Position	1	S100B+	DAPI+		4015
96957.4	38428.8	10.5199	µm	Spot	Position	1	S100B+	DAPI+		4017
96948.2	38484.1	9.96862	µm	Spot	Position	1	S100B+	DAPI+		4093
96936.9	38517.7	9.98836	µm	Spot	Position	1	S100B+	DAPI+		4160
96933.3	38625	10.0661	µm	Spot	Position	1	S100B+	DAPI+		4328
96925	38625.3	10.5052	µm	Spot	Position	1	S100B+	DAPI+		4337
96922.2	38629.5	10.7602	µm	Spot	Position	1	S100B+	DAPI+		4344
96935.5	38677.7	9.95141	µm	Spot	Position	1	S100B+	DAPI+		4420
96930.5	38692.4	10.2747	µm	Spot	Position	1	S100B+	DAPI+		4431
96924.7	38728.2	9.64621	µm	Spot	Position	1	S100B+	DAPI+		4498
96923.1	38709.8	10.0633	µm	Spot	Position	1	S100B+	DAPI+		4503
96921.6	38782.6	10.1424	µm	Spot	Position	1	S100B+	DAPI+		4570
96904.7	38779	10.7154	µm	Spot	Position	1	S100B+	DAPI+		4580
96915	38818.2	10.1023	µm	Spot	Position	1	S100B+	DAPI+		4644
96918.5	38822.8	10.185	µm	Spot	Position	1	S100B+	DAPI+		4645
96898.6	38815.3	10.6259	µm	Spot	Position	1	S100B+	DAPI+		4653
96918	38870	10.1535	µm	Spot	Position	1	S100B+	DAPI+		4754
96927.7	38924.7	9.97221	µm	Spot	Position	1	S100B+	DAPI+		4862
96918.8	38920.8	10.2592	µm	Spot	Position	1	S100B+	DAPI+		4869
96927.9	38927.8	10.4787	µm	Spot	Position	1	S100B+	DAPI+		4870
96926.3	38903.6	10.6297	µm	Spot	Position	1	S100B+	DAPI+		4872
96925.7	38918.8	10.5673	µm	Spot	Position	1	S100B+	DAPI+		4874
96923.2	38962.3	9.83377	µm	Spot	Position	1	S100B+	DAPI+		4944
96933.8	38934.7	10.3869	µm	Spot	Position	1	S100B+	DAPI+		4946
96911.8	38949.4	10.4747	µm	Spot	Position	1	S100B+	DAPI+		4947
96931.4	38957	10.3223	µm	Spot	Position	1	S100B+	DAPI+		4948
96929.5	38952.5	10.607	µm	Spot	Position	1	S100B+	DAPI+		4949
96932.5	38961.4	10.6377	µm	Spot	Position	1	S100B+	DAPI+		4950
96900.5	38966.6	10.7725	µm	Spot	Position	1	S100B+	DAPI+		4951
96924.9	38966.4	10.5886	µm	Spot	Position	1	S100B+	DAPI+		4952
96909.2	38974.5	10.5663	µm	Spot	Position	1	S100B+	DAPI+		4953
96911	38994.9	10.1662	µm	Spot	Position	1	S100B+	DAPI+		5030
96900.5	38988.5	10.2257	µm	Spot	Position	1	S100B+	DAPI+		5031
96910.2	38993.5	10.2487	µm	Spot	Position	1	S100B+	DAPI+		5032
96910.2	38994.7	10.2694	µm	Spot	Position	1	S100B+	DAPI+		5033
96909	39007.1	10.2934	µm	Spot	Position	1	S100B+	DAPI+		5034
96906.7	38999.7	10.7954	µm	Spot	Position	1	S100B+	DAPI+		5035
96917.3	39002	10.8053	µm	Spot	Position	1	S100B+	DAPI+		5036
96922.9	38005.4	11.5969	µm	Spot	Position	1	S100B+	DAPI+		5852
96895.7	38041.9	10.945	µm	Spot	Position	1	S100B+	DAPI+		5881
96895.5	38040.7	11.1883	µm	Spot	Position	1	S100B+	DAPI+		5884
96893.9	38042.6	11.25	µm	Spot	Position	1	S100B+	DAPI+		5885
96879.1	38025.9	11.8599	µm	Spot	Position	1	S100B+	DAPI+		5889
96930.9	38027.4	10.9421	µm	Spot	Position	1	S100B+	DAPI+		5891
96928.7	38041.9	10.854	µm	Spot	Position	1	S100B+	DAPI+		5892
96914.6	38039.7	11.3597	µm	Spot	Position	1	S100B+	DAPI+		5894
96915.3	38040.1	11.299	µm	Spot	Position	1	S100B+	DAPI+		5895
96906.2	38011.3	11.4731	µm	Spot	Position	1	S100B+	DAPI+		5896
96916.3	38040.4	11.5693	µm	Spot	Position	1	S100B+	DAPI+		5897
96919.2	38043.2	11.6191	µm	Spot	Position	1	S100B+	DAPI+		5898
96927.6	38046.8	11.5928	µm	Spot	Position	1	S100B+	DAPI+		5899
96913.6	38038.3	11.7309	µm	Spot	Position	1	S100B+	DAPI+		5901
96945.1	38039	11.0773	µm	Spot	Position	1	S100B+	DAPI+		5904
96949.8	38206.7	11.2014	µm	Spot	Position	1	S100B+	DAPI+		6151
96945.8	38314.4	11.5332	µm	Spot	Position	1	S100B+	DAPI+		6309
96954.8	38422.8	11.1798	µm	Spot	Position	1	S100B+	DAPI+		6441
96958.8	38427.5	10.8912	µm	Spot	Position	1	S100B+	DAPI+		6518
96954.3	38434.3	11.5984	µm	Spot	Position	1	S100B+	DAPI+		6526
96953.4	38429.5	11.9804	µm	Spot	Position	1	S100B+	DAPI+		6531
96953.5	38433.9	11.7743	µm	Spot	Position	1	S100B+	DAPI+		6532
96938.5	38534	11.28	µm	Spot	Position	1	S100B+	DAPI+		6698
96930.5	38622.7	11.5658	µm	Spot	Position	1	S100B+	DAPI+		6851
96923.1	38651.1	11.5188	µm	Spot	Position	1	S100B+	DAPI+		6853
96927.2	38691.4	10.9852	µm	Spot	Position	1	S100B+	DAPI+		6923
96927.5	38694.8	11.3852	µm	Spot	Position	1	S100B+	DAPI+		6925
96916.8	38705.6	11.8312	µm	Spot	Position	1	S100B+	DAPI+		7008
96922.7	38723.8	11.822	µm	Spot	Position	1	S100B+	DAPI+		7010
96902.3	38792.6	11.4499	µm	Spot	Position	1	S100B+	DAPI+		7084
96899.4	38827.3	10.959	µm	Spot	Position	1	S100B+	DAPI+		7163
96913.2	38922.4	10.8304	µm	Spot	Position	1	S100B+	DAPI+		7373
96926.6	38892.8	11.1396	µm	Spot	Position	1	S100B+	DAPI+		7377
96924.8	38926.7	11.2852	µm	Spot	Position	1	S100B+	DAPI+		7378
96919.6	38914.3	11.6733	µm	Spot	Position	1	S100B+	DAPI+		7380
96929.2	38924.2	11.6103	µm	Spot	Position	1	S100B+	DAPI+		7383
96936.8	38933.4	11.0378	µm	Spot	Position	1	S100B+	DAPI+		7454
96918.1	38946.8	10.8445	µm	Spot	Position	1	S100B+	DAPI+		7455
96934.3	38953.3	10.8632	µm	Spot	Position	1	S100B+	DAPI+		7456
96905.7	38974.1	11.0543	µm	Spot	Position	1	S100B+	DAPI+		7457
96908.1	38949.9	11.1487	µm	Spot	Position	1	S100B+	DAPI+		7458
96905.2	38975.7	11.1843	µm	Spot	Position	1	S100B+	DAPI+		7459
96921.4	38977.2	11.3535	µm	Spot	Position	1	S100B+	DAPI+		7460
96905.5	38932.9	11.9093	µm	Spot	Position	1	S100B+	DAPI+		7462
96940.9	38959.2	11.7277	µm	Spot	Position	1	S100B+	DAPI+		7464
96913.1	38973.6	11.9526	µm	Spot	Position	1	S100B+	DAPI+		7465
96905.2	38977.1	11.7167	µm	Spot	Position	1	S100B+	DAPI+		7466
96893.6	39005.3	11.671	µm	Spot	Position	1	S100B+	DAPI+		7555
96895.9	38989.2	11.7208	µm	Spot	Position	1	S100B+	DAPI+		7557
96891	39003.2	12.0011	µm	Spot	Position	1	S100B+	DAPI+		7558
96912.5	38995	10.9757	µm	Spot	Position	1	S100B+	DAPI+		7559
96919.1	38996.4	11.0346	µm	Spot	Position	1	S100B+	DAPI+		7560
96930.9	38984.3	11.3805	µm	Spot	Position	1	S100B+	DAPI+		7562
96914.6	38990.9	11.1474	µm	Spot	Position	1	S100B+	DAPI+		7563
96923.3	38991.9	11.506	µm	Spot	Position	1	S100B+	DAPI+		7565
96919.9	38995.2	11.8292	µm	Spot	Position	1	S100B+	DAPI+		7567
96920.1	38003.7	12.125	µm	Spot	Position	1	S100B+	DAPI+		8727
96888.5	38038.7	12.1929	µm	Spot	Position	1	S100B+	DAPI+		8736
96943.5	38107.9	12.5243	µm	Spot	Position	1	S100B+	DAPI+		8782
96945.2	38280.2	12.2032	µm	Spot	Position	1	S100B+	DAPI+		8866
96948.4	38330.6	12.1326	µm	Spot	Position	1	S100B+	DAPI+		8892
96932	38680.9	12.6265	µm	Spot	Position	1	S100B+	DAPI+		9238
96918.3	38726.3	12.5219	µm	Spot	Position	1	S100B+	DAPI+		9293
96920.3	38720.2	13.0332	µm	Spot	Position	1	S100B+	DAPI+		9301
96918.5	38758.1	12.2409	µm	Spot	Position	1	S100B+	DAPI+		9352
96919.4	38760.4	12.2982	µm	Spot	Position	1	S100B+	DAPI+		9353
96913.3	38838.7	12.0171	µm	Spot	Position	1	S100B+	DAPI+		9444
96901.2	38841.2	12.494	µm	Spot	Position	1	S100B+	DAPI+		9526
96902	38846.1	12.7575	µm	Spot	Position	1	S100B+	DAPI+		9529
96902.7	38918.1	12.6672	µm	Spot	Position	1	S100B+	DAPI+		9605
96930	38928.3	12.7649	µm	Spot	Position	1	S100B+	DAPI+		9606
96924.4	38929.6	13.0635	µm	Spot	Position	1	S100B+	DAPI+		9607
96926	38975.2	12.1856	µm	Spot	Position	1	S100B+	DAPI+		9690
96922.6	38949.5	12.5545	µm	Spot	Position	1	S100B+	DAPI+		9691
96925.4	38974.3	12.4174	µm	Spot	Position	1	S100B+	DAPI+		9692
96905.4	38936.1	12.8934	µm	Spot	Position	1	S100B+	DAPI+		9693
96931.8	38940.2	12.9141	µm	Spot	Position	1	S100B+	DAPI+		9695
96899.1	38965.9	12.9342	µm	Spot	Position	1	S100B+	DAPI+		9696
96897	39000.5	12.9353	µm	Spot	Position	1	S100B+	DAPI+		9775
96917.4	39008.5	12.2319	µm	Spot	Position	1	S100B+	DAPI+		9776
96905.1	38988.6	12.3554	µm	Spot	Position	1	S100B+	DAPI+		9777
96909.7	38999.3	12.3448	µm	Spot	Position	1	S100B+	DAPI+		9778
96907	39009.7	12.7451	µm	Spot	Position	1	S100B+	DAPI+		9782
96916.1	38993.6	13.1087	µm	Spot	Position	1	S100B+	DAPI+		9786
96915.9	39026.3	12.551	µm	Spot	Position	1	S100B+	DAPI+		9900
96908.2	38905.9	13.6258	µm	Spot	Position	1	S100B+	DAPI+		10884
96918.8	38945.5	13.9376	µm	Spot	Position	1	S100B+	DAPI+		10923
96907.8	38964.7	14.0576	µm	Spot	Position	1	S100B+	DAPI+		10924
96919.6	38988.4	13.3742	µm	Spot	Position	1	S100B+	DAPI+		10982
96908.9	38996.4	13.8034	µm	Spot	Position	1	S100B+	DAPI+		10986
96901	38989.4	13.8702	µm	Spot	Position	1	S100B+	DAPI+		10988
96939.8	38952.6	14.5265	µm	Spot	Position	1	S100B+	DAPI+		11823
96934.2	38049.9	1.05051	µm	Spot	Position	1	S100B-	DAPI+		1
96936.2	38065.5	2.16451	µm	Spot	Position	1	S100B-	DAPI+		7
96935.7	38663.9	2.16843	µm	Spot	Position	1	S100B-	DAPI+		10
96953.2	38044.7	3.31761	µm	Spot	Position	1	S100B-	DAPI+		12
96938.9	38069.7	3.12673	µm	Spot	Position	1	S100B-	DAPI+		17
96940.3	38069.6	3.13184	µm	Spot	Position	1	S100B-	DAPI+		18
96940.9	38068.7	3.32187	µm	Spot	Position	1	S100B-	DAPI+		19
96941.4	38069.9	3.48587	µm	Spot	Position	1	S100B-	DAPI+		20
96940.3	38070.9	3.44715	µm	Spot	Position	1	S100B-	DAPI+		21
96935.3	38662.8	2.77413	µm	Spot	Position	1	S100B-	DAPI+		33
96937.7	38664.8	3.19086	µm	Spot	Position	1	S100B-	DAPI+		35
96934.6	38664.3	3.53416	µm	Spot	Position	1	S100B-	DAPI+		38
96935.8	38037.3	4.12889	µm	Spot	Position	1	S100B-	DAPI+		43
96929.9	38034	4.659	µm	Spot	Position	1	S100B-	DAPI+		44
96922.1	38055.8	4.11992	µm	Spot	Position	1	S100B-	DAPI+		47
96949.3	38186.1	4.4444	µm	Spot	Position	1	S100B-	DAPI+		57
96947.2	38187.4	4.60806	µm	Spot	Position	1	S100B-	DAPI+		58
96948.1	38194	4.38527	µm	Spot	Position	1	S100B-	DAPI+		60
96952.9	38257.3	3.97092	µm	Spot	Position	1	S100B-	DAPI+		64
96953.2	38258.4	4.14287	µm	Spot	Position	1	S100B-	DAPI+		65
96949.6	38259.5	4.46223	µm	Spot	Position	1	S100B-	DAPI+		67
96938.4	38664.1	3.76813	µm	Spot	Position	1	S100B-	DAPI+		91
96938.5	38662	4.03774	µm	Spot	Position	1	S100B-	DAPI+		96
96938.7	38668.6	4.49909	µm	Spot	Position	1	S100B-	DAPI+		102
96926.7	38660.4	4.65288	µm	Spot	Position	1	S100B-	DAPI+		103
96914.8	39020.1	4.71043	µm	Spot	Position	1	S100B-	DAPI+		110
96938.7	38038.3	5.82431	µm	Spot	Position	1	S100B-	DAPI+		132
96941	38066.1	4.9555	µm	Spot	Position	1	S100B-	DAPI+		148
96918.1	38056.3	5.63728	µm	Spot	Position	1	S100B-	DAPI+		153
96921.3	38061.3	5.66153	µm	Spot	Position	1	S100B-	DAPI+		154
96946.7	38186.1	4.9428	µm	Spot	Position	1	S100B-	DAPI+		176
96952.6	38183.5	5.20247	µm	Spot	Position	1	S100B-	DAPI+		178
96956.9	38260.2	4.86914	µm	Spot	Position	1	S100B-	DAPI+		189
96952.1	38266.5	5.03388	µm	Spot	Position	1	S100B-	DAPI+		190
96946.6	38253.3	5.32926	µm	Spot	Position	1	S100B-	DAPI+		191
96952.8	38262	5.54273	µm	Spot	Position	1	S100B-	DAPI+		193
96958.1	38309.2	5.22613	µm	Spot	Position	1	S100B-	DAPI+		208
96940.9	38511.7	5.56349	µm	Spot	Position	1	S100B-	DAPI+		231
96945.4	38512.7	5.5155	µm	Spot	Position	1	S100B-	DAPI+		233
96944.1	38525.3	5.6033	µm	Spot	Position	1	S100B-	DAPI+		242
96944.8	38525.9	5.56711	µm	Spot	Position	1	S100B-	DAPI+		243
96937	38650.5	5.23489	µm	Spot	Position	1	S100B-	DAPI+		254
96935.3	38645.5	5.63102	µm	Spot	Position	1	S100B-	DAPI+		256
96933	38691	4.90235	µm	Spot	Position	1	S100B-	DAPI+		260
96928.4	38657.9	5.58363	µm	Spot	Position	1	S100B-	DAPI+		266
96925.4	38672.2	5.53089	µm	Spot	Position	1	S100B-	DAPI+		268
96909.1	38004.7	6.41104	µm	Spot	Position	1	S100B-	DAPI+		298
96915.4	38007.1	7.14765	µm	Spot	Position	1	S100B-	DAPI+		299
96938.7	38032	6.21097	µm	Spot	Position	1	S100B-	DAPI+		331
96938.3	38033.4	6.77992	µm	Spot	Position	1	S100B-	DAPI+		333
96939.2	38039.3	6.76529	µm	Spot	Position	1	S100B-	DAPI+		334
96926.4	38046.9	7.03425	µm	Spot	Position	1	S100B-	DAPI+		336
96949.4	38057.7	6.55562	µm	Spot	Position	1	S100B-	DAPI+		367
96945.6	38064.5	6.63746	µm	Spot	Position	1	S100B-	DAPI+		368
96942.9	38174.4	6.49357	µm	Spot	Position	1	S100B-	DAPI+		409
96941.8	38158.4	6.68896	µm	Spot	Position	1	S100B-	DAPI+		412
96952.1	38181.8	6.43636	µm	Spot	Position	1	S100B-	DAPI+		416
96949.7	38222.2	7.11415	µm	Spot	Position	1	S100B-	DAPI+		443
96947.8	38255.1	6.46538	µm	Spot	Position	1	S100B-	DAPI+		451
96950.8	38263.5	6.86841	µm	Spot	Position	1	S100B-	DAPI+		453
96950.2	38286.6	7.15583	µm	Spot	Position	1	S100B-	DAPI+		479
96944.4	38511.3	6.02504	µm	Spot	Position	1	S100B-	DAPI+		565
96947.4	38472.7	7.07069	µm	Spot	Position	1	S100B-	DAPI+		569
96940	38526.5	7.10592	µm	Spot	Position	1	S100B-	DAPI+		583
96942.4	38550.2	7.01497	µm	Spot	Position	1	S100B-	DAPI+		586
96949.3	38521.2	6.08718	µm	Spot	Position	1	S100B-	DAPI+		588
96944.9	38552	6.16281	µm	Spot	Position	1	S100B-	DAPI+		589
96948	38521.9	7.11432	µm	Spot	Position	1	S100B-	DAPI+		590
96947	38522.2	7.01594	µm	Spot	Position	1	S100B-	DAPI+		591
96932.1	38640.2	6.54991	µm	Spot	Position	1	S100B-	DAPI+		620
96936.4	38643.2	6.7194	µm	Spot	Position	1	S100B-	DAPI+		623
96922.5	38678.3	6.44167	µm	Spot	Position	1	S100B-	DAPI+		646
96918.4	38688.6	6.58857	µm	Spot	Position	1	S100B-	DAPI+		650
96925.6	38663.8	6.7725	µm	Spot	Position	1	S100B-	DAPI+		655
96924.1	38671.4	6.79329	µm	Spot	Position	1	S100B-	DAPI+		656
96913	38698.1	6.68313	µm	Spot	Position	1	S100B-	DAPI+		662
96908	38710	6.12281	µm	Spot	Position	1	S100B-	DAPI+		670
96905.4	38729.4	6.28483	µm	Spot	Position	1	S100B-	DAPI+		671
96907.7	38720	6.45474	µm	Spot	Position	1	S100B-	DAPI+		674
96906.8	38722.1	6.32049	µm	Spot	Position	1	S100B-	DAPI+		675
96897	38807.1	7.06063	µm	Spot	Position	1	S100B-	DAPI+		688
96886.5	38858.6	7.03749	µm	Spot	Position	1	S100B-	DAPI+		702
96901.6	39011.4	7.09088	µm	Spot	Position	1	S100B-	DAPI+		713
96891.3	38008.6	7.2216	µm	Spot	Position	1	S100B-	DAPI+		747
96912.2	37999.5	7.47309	µm	Spot	Position	1	S100B-	DAPI+		751
96888.6	38041	7.42446	µm	Spot	Position	1	S100B-	DAPI+		785
96886	38033.7	7.54079	µm	Spot	Position	1	S100B-	DAPI+		786
96894.9	38011	8.20577	µm	Spot	Position	1	S100B-	DAPI+		793
96929.2	38025.6	7.43738	µm	Spot	Position	1	S100B-	DAPI+		795
96905.5	38048	7.41771	µm	Spot	Position	1	S100B-	DAPI+		796
96920	38012.6	7.76456	µm	Spot	Position	1	S100B-	DAPI+		797
96906.4	38046.3	7.79116	µm	Spot	Position	1	S100B-	DAPI+		798
96904.4	38048.1	7.59622	µm	Spot	Position	1	S100B-	DAPI+		799
96918	38013.3	8.23233	µm	Spot	Position	1	S100B-	DAPI+		803
96918.2	38059.6	8.05178	µm	Spot	Position	1	S100B-	DAPI+		838
96922.5	38062.1	8.02371	µm	Spot	Position	1	S100B-	DAPI+		839
96912.1	38073.9	8.09374	µm	Spot	Position	1	S100B-	DAPI+		841
96944.5	38077.5	7.23168	µm	Spot	Position	1	S100B-	DAPI+		845
96936.9	38135.1	8.02585	µm	Spot	Position	1	S100B-	DAPI+		877
96939.1	38111	8.3981	µm	Spot	Position	1	S100B-	DAPI+		878
96941.4	38171.9	7.48406	µm	Spot	Position	1	S100B-	DAPI+		915
96935.9	38158	7.93199	µm	Spot	Position	1	S100B-	DAPI+		921
96942.7	38160.8	8.12556	µm	Spot	Position	1	S100B-	DAPI+		928
96943.5	38178.1	8.20229	µm	Spot	Position	1	S100B-	DAPI+		929
96940.7	38192.6	8.12859	µm	Spot	Position	1	S100B-	DAPI+		930
96951.7	38191.5	7.39137	µm	Spot	Position	1	S100B-	DAPI+		932
96945.6	38171.1	8.11791	µm	Spot	Position	1	S100B-	DAPI+		937
96945.9	38188.7	8.14068	µm	Spot	Position	1	S100B-	DAPI+		939
96947	38209.9	7.68146	µm	Spot	Position	1	S100B-	DAPI+		973
96948.9	38194.5	7.97787	µm	Spot	Position	1	S100B-	DAPI+		974
96954.2	38199.3	8.10129	µm	Spot	Position	1	S100B-	DAPI+		976
96944.1	38200	7.87106	µm	Spot	Position	1	S100B-	DAPI+		977
96954	38230.6	7.93319	µm	Spot	Position	1	S100B-	DAPI+		979
96951.9	38196.6	8.11551	µm	Spot	Position	1	S100B-	DAPI+		980
96948.4	38261.6	7.82248	µm	Spot	Position	1	S100B-	DAPI+		1019
96956.3	38264.2	8.27153	µm	Spot	Position	1	S100B-	DAPI+		1022
96957.8	38287.7	7.46802	µm	Spot	Position	1	S100B-	DAPI+		1063
96958.3	38286.6	7.96612	µm	Spot	Position	1	S100B-	DAPI+		1065
96957.1	38322.6	8.1276	µm	Spot	Position	1	S100B-	DAPI+		1070
96947.6	38335.5	7.57337	µm	Spot	Position	1	S100B-	DAPI+		1109
96951.7	38338.1	7.62664	µm	Spot	Position	1	S100B-	DAPI+		1110
96953.8	38338.8	7.84417	µm	Spot	Position	1	S100B-	DAPI+		1112
96951.1	38356.5	7.8512	µm	Spot	Position	1	S100B-	DAPI+		1114
96947.7	38367	7.96228	µm	Spot	Position	1	S100B-	DAPI+		1115
96946.8	38336.2	8.26842	µm	Spot	Position	1	S100B-	DAPI+		1116
96948	38337.8	8.32687	µm	Spot	Position	1	S100B-	DAPI+		1117
96953	38416.2	7.94177	µm	Spot	Position	1	S100B-	DAPI+		1158
96956.4	38420.3	8.06439	µm	Spot	Position	1	S100B-	DAPI+		1159
96958.7	38416.7	8.25861	µm	Spot	Position	1	S100B-	DAPI+		1160
96954.1	38420.7	8.13886	µm	Spot	Position	1	S100B-	DAPI+		1161
96957.2	38421.6	8.18601	µm	Spot	Position	1	S100B-	DAPI+		1162
96950.7	38440	7.66076	µm	Spot	Position	1	S100B-	DAPI+		1198
96957.5	38443.7	7.64607	µm	Spot	Position	1	S100B-	DAPI+		1199
96951	38452.4	7.73104	µm	Spot	Position	1	S100B-	DAPI+		1200
96951.1	38465.4	8.01455	µm	Spot	Position	1	S100B-	DAPI+		1201
96948.9	38465.2	8.28586	µm	Spot	Position	1	S100B-	DAPI+		1202
96938.7	38513.3	7.2562	µm	Spot	Position	1	S100B-	DAPI+		1221
96939.7	38494.1	7.79665	µm	Spot	Position	1	S100B-	DAPI+		1228
96938.9	38494.7	7.51099	µm	Spot	Position	1	S100B-	DAPI+		1229
96948	38473.5	7.45341	µm	Spot	Position	1	S100B-	DAPI+		1240
96944.2	38474.7	7.3018	µm	Spot	Position	1	S100B-	DAPI+		1241
96948.4	38515	7.62462	µm	Spot	Position	1	S100B-	DAPI+		1242
96944.2	38508.5	7.88537	µm	Spot	Position	1	S100B-	DAPI+		1246
96950.8	38471.2	8.21578	µm	Spot	Position	1	S100B-	DAPI+		1247
96943.5	38549.7	7.39039	µm	Spot	Position	1	S100B-	DAPI+		1279
96941.8	38549.5	7.89302	µm	Spot	Position	1	S100B-	DAPI+		1284
96936.5	38532	8.3386	µm	Spot	Position	1	S100B-	DAPI+		1286
96947.6	38523	7.3891	µm	Spot	Position	1	S100B-	DAPI+		1296
96946.8	38520.9	7.88115	µm	Spot	Position	1	S100B-	DAPI+		1301
96948.8	38520.4	8.17341	µm	Spot	Position	1	S100B-	DAPI+		1305
96942.1	38570.4	7.66941	µm	Spot	Position	1	S100B-	DAPI+		1335
96937.4	38580.1	7.558	µm	Spot	Position	1	S100B-	DAPI+		1338
96934.6	38599.7	7.99769	µm	Spot	Position	1	S100B-	DAPI+		1347
96932.4	38597.7	8.34975	µm	Spot	Position	1	S100B-	DAPI+		1355
96934.2	38628	7.84044	µm	Spot	Position	1	S100B-	DAPI+		1382
96917.1	38628.5	7.90116	µm	Spot	Position	1	S100B-	DAPI+		1383
96933.3	38637.3	8.06724	µm	Spot	Position	1	S100B-	DAPI+		1387
96935.3	38617	8.17208	µm	Spot	Position	1	S100B-	DAPI+		1388
96931.1	38631.5	8.19373	µm	Spot	Position	1	S100B-	DAPI+		1390
96932.8	38642.8	8.16753	µm	Spot	Position	1	S100B-	DAPI+		1393
96940.4	38698.5	7.36892	µm	Spot	Position	1	S100B-	DAPI+		1415
96922.8	38660.5	7.52314	µm	Spot	Position	1	S100B-	DAPI+		1417
96932.9	38662.2	7.65961	µm	Spot	Position	1	S100B-	DAPI+		1419
96924.9	38699.1	7.74961	µm	Spot	Position	1	S100B-	DAPI+		1428
96922	38656.8	8.20622	µm	Spot	Position	1	S100B-	DAPI+		1435
96921.9	38661.3	8.23054	µm	Spot	Position	1	S100B-	DAPI+		1436
96919	38687.7	8.21762	µm	Spot	Position	1	S100B-	DAPI+		1440
96926.2	38688	8.36007	µm	Spot	Position	1	S100B-	DAPI+		1441
96916	38702.3	7.98068	µm	Spot	Position	1	S100B-	DAPI+		1460
96897.3	38821.5	7.69164	µm	Spot	Position	1	S100B-	DAPI+		1490
96908.5	38808.4	7.63887	µm	Spot	Position	1	S100B-	DAPI+		1499
96916.8	38797.6	8.07808	µm	Spot	Position	1	S100B-	DAPI+		1500
96916.8	38800.5	8.18727	µm	Spot	Position	1	S100B-	DAPI+		1501
96914.9	38804.7	8.16867	µm	Spot	Position	1	S100B-	DAPI+		1502
96895.3	38885.3	7.80457	µm	Spot	Position	1	S100B-	DAPI+		1514
96888.6	38854.7	7.93555	µm	Spot	Position	1	S100B-	DAPI+		1516
96906.5	38918	8.28602	µm	Spot	Position	1	S100B-	DAPI+		1532
96895.2	39002.6	8.18736	µm	Spot	Position	1	S100B-	DAPI+		1548
96912.5	38989.3	7.56642	µm	Spot	Position	1	S100B-	DAPI+		1550
96905	39012.3	7.68265	µm	Spot	Position	1	S100B-	DAPI+		1551
96911.6	39011.4	8.05735	µm	Spot	Position	1	S100B-	DAPI+		1553
96913.8	37998.6	9.31093	µm	Spot	Position	1	S100B-	DAPI+		1658
96906.2	38050.7	9.20726	µm	Spot	Position	1	S100B-	DAPI+		1697
96922.3	38079.5	8.52825	µm	Spot	Position	1	S100B-	DAPI+		1747
96923.1	38099.6	8.51043	µm	Spot	Position	1	S100B-	DAPI+		1749
96943.4	38063.1	8.80189	µm	Spot	Position	1	S100B-	DAPI+		1750
96937.2	38072.7	9.24395	µm	Spot	Position	1	S100B-	DAPI+		1752
96923	38055.4	9.34506	µm	Spot	Position	1	S100B-	DAPI+		1753
96932	38056.2	9.47216	µm	Spot	Position	1	S100B-	DAPI+		1754
96946.4	38097	8.83939	µm	Spot	Position	1	S100B-	DAPI+		1761
96947	38061.3	9.57406	µm	Spot	Position	1	S100B-	DAPI+		1763
96929.4	38128.6	8.45173	µm	Spot	Position	1	S100B-	DAPI+		1804
96932.9	38136.9	8.90409	µm	Spot	Position	1	S100B-	DAPI+		1806
96942.1	38114.6	9.22298	µm	Spot	Position	1	S100B-	DAPI+		1808
96929.9	38140.9	9.14202	µm	Spot	Position	1	S100B-	DAPI+		1812
96936.6	38111.2	9.33259	µm	Spot	Position	1	S100B-	DAPI+		1813
96938.8	38127.4	9.59647	µm	Spot	Position	1	S100B-	DAPI+		1814
96938.9	38174.1	8.56299	µm	Spot	Position	1	S100B-	DAPI+		1863
96935.8	38179.2	8.51779	µm	Spot	Position	1	S100B-	DAPI+		1864
96938.8	38165.2	8.99767	µm	Spot	Position	1	S100B-	DAPI+		1870
96941.9	38175.4	8.75605	µm	Spot	Position	1	S100B-	DAPI+		1871
96943.8	38162.1	9.09777	µm	Spot	Position	1	S100B-	DAPI+		1872
96946.1	38148	8.53242	µm	Spot	Position	1	S100B-	DAPI+		1878
96944.6	38154.6	8.53495	µm	Spot	Position	1	S100B-	DAPI+		1879
96946.6	38163.9	9.32451	µm	Spot	Position	1	S100B-	DAPI+		1884
96939.7	38218.3	9.41341	µm	Spot	Position	1	S100B-	DAPI+		1953
96946.8	38206.5	8.6746	µm	Spot	Position	1	S100B-	DAPI+		1957
96951.1	38195.4	9.06696	µm	Spot	Position	1	S100B-	DAPI+		1962
96944.1	38217.5	9.10226	µm	Spot	Position	1	S100B-	DAPI+		1963
96948.2	38208.6	9.34696	µm	Spot	Position	1	S100B-	DAPI+		1969
96952.9	38226.6	9.34411	µm	Spot	Position	1	S100B-	DAPI+		1970
96956	38249.4	8.42835	µm	Spot	Position	1	S100B-	DAPI+		2041
96952.8	38255.2	9.49509	µm	Spot	Position	1	S100B-	DAPI+		2049
96949.5	38288.8	8.67318	µm	Spot	Position	1	S100B-	DAPI+		2103
96955.9	38327.4	8.91101	µm	Spot	Position	1	S100B-	DAPI+		2109
96953.1	38314.5	9.21774	µm	Spot	Position	1	S100B-	DAPI+		2112
96953.6	38327.6	9.25328	µm	Spot	Position	1	S100B-	DAPI+		2113
96955	38313	9.45898	µm	Spot	Position	1	S100B-	DAPI+		2117
96953	38341.4	8.41171	µm	Spot	Position	1	S100B-	DAPI+		2184
96955	38351.1	8.4412	µm	Spot	Position	1	S100B-	DAPI+		2185
96956.3	38339.8	8.8042	µm	Spot	Position	1	S100B-	DAPI+		2186
96949.7	38356.5	8.93151	µm	Spot	Position	1	S100B-	DAPI+		2187
96953.6	38348	9.14341	µm	Spot	Position	1	S100B-	DAPI+		2188
96951	38422.4	8.64446	µm	Spot	Position	1	S100B-	DAPI+		2258
96956.3	38418.3	8.84231	µm	Spot	Position	1	S100B-	DAPI+		2261
96954.7	38424.4	9.19862	µm	Spot	Position	1	S100B-	DAPI+		2264
96943.1	38428.8	9.4284	µm	Spot	Position	1	S100B-	DAPI+		2310
96948.3	38463.8	8.58885	µm	Spot	Position	1	S100B-	DAPI+		2317
96947.6	38441.7	8.9039	µm	Spot	Position	1	S100B-	DAPI+		2320
96948.1	38455.5	8.82951	µm	Spot	Position	1	S100B-	DAPI+		2321
96950.3	38458.7	8.88571	µm	Spot	Position	1	S100B-	DAPI+		2322
96947.6	38469.2	8.9656	µm	Spot	Position	1	S100B-	DAPI+		2323
96954.4	38440.6	9.1723	µm	Spot	Position	1	S100B-	DAPI+		2324
96950.2	38467.1	9.35763	µm	Spot	Position	1	S100B-	DAPI+		2328
96942.5	38496	8.78788	µm	Spot	Position	1	S100B-	DAPI+		2371
96938	38512.2	9.5728	µm	Spot	Position	1	S100B-	DAPI+		2384
96950.6	38476.2	8.41749	µm	Spot	Position	1	S100B-	DAPI+		2386
96944.1	38507.5	9.16992	µm	Spot	Position	1	S100B-	DAPI+		2392
96947.6	38512	9.13074	µm	Spot	Position	1	S100B-	DAPI+		2393
96936.8	38543.5	8.67113	µm	Spot	Position	1	S100B-	DAPI+		2426
96941.9	38545.9	8.53921	µm	Spot	Position	1	S100B-	DAPI+		2427
96937.3	38524.6	8.77269	µm	Spot	Position	1	S100B-	DAPI+		2432
96948.1	38540.9	9.06533	µm	Spot	Position	1	S100B-	DAPI+		2451
96944.9	38541.1	9.01901	µm	Spot	Position	1	S100B-	DAPI+		2452
96948.8	38554.9	9.15336	µm	Spot	Position	1	S100B-	DAPI+		2454
96947.6	38530.9	9.33704	µm	Spot	Position	1	S100B-	DAPI+		2456
96938.2	38582.1	9.46725	µm	Spot	Position	1	S100B-	DAPI+		2506
96930	38611.1	8.84201	µm	Spot	Position	1	S100B-	DAPI+		2547
96931	38649.7	8.83374	µm	Spot	Position	1	S100B-	DAPI+		2555
96921.7	38650.7	9.27691	µm	Spot	Position	1	S100B-	DAPI+		2560
96925.3	38637.1	9.40945	µm	Spot	Position	1	S100B-	DAPI+		2563
96932.4	38647.4	9.41042	µm	Spot	Position	1	S100B-	DAPI+		2564
96936.5	38693.3	8.54928	µm	Spot	Position	1	S100B-	DAPI+		2607
96931.8	38664.5	8.86975	µm	Spot	Position	1	S100B-	DAPI+		2609
96939.1	38681.2	8.97248	µm	Spot	Position	1	S100B-	DAPI+		2612
96931.8	38659.6	9.15001	µm	Spot	Position	1	S100B-	DAPI+		2618
96942.1	38683.3	9.28155	µm	Spot	Position	1	S100B-	DAPI+		2621
96936.5	38696.8	9.08635	µm	Spot	Position	1	S100B-	DAPI+		2622
96925.2	38686	9.38416	µm	Spot	Position	1	S100B-	DAPI+		2628
96932.2	38741.1	9.28014	µm	Spot	Position	1	S100B-	DAPI+		2660
96918.5	38714.1	9.56244	µm	Spot	Position	1	S100B-	DAPI+		2663
96916.5	38762.4	8.6735	µm	Spot	Position	1	S100B-	DAPI+		2695
96933.1	38769.5	8.6207	µm	Spot	Position	1	S100B-	DAPI+		2697
96914.7	38761	8.70615	µm	Spot	Position	1	S100B-	DAPI+		2700
96925.2	38773.5	8.90264	µm	Spot	Position	1	S100B-	DAPI+		2701
96925.1	38768.8	9.26682	µm	Spot	Position	1	S100B-	DAPI+		2704
96922.5	38771.6	9.21093	µm	Spot	Position	1	S100B-	DAPI+		2705
96913.9	38791	9.08244	µm	Spot	Position	1	S100B-	DAPI+		2706
96920.6	38751.1	9.46352	µm	Spot	Position	1	S100B-	DAPI+		2707
96925.6	38774.2	9.31783	µm	Spot	Position	1	S100B-	DAPI+		2708
96895.6	38833.7	9.52063	µm	Spot	Position	1	S100B-	DAPI+		2755
96916.3	38804.2	8.54522	µm	Spot	Position	1	S100B-	DAPI+		2756
96900.4	38819.5	8.81868	µm	Spot	Position	1	S100B-	DAPI+		2758
96901.6	38820.4	8.97212	µm	Spot	Position	1	S100B-	DAPI+		2759
96914.3	38803.2	9.12302	µm	Spot	Position	1	S100B-	DAPI+		2762
96911.3	38804.7	9.22806	µm	Spot	Position	1	S100B-	DAPI+		2763
96916.3	38794.7	9.55699	µm	Spot	Position	1	S100B-	DAPI+		2764
96915.2	38839.3	9.59374	µm	Spot	Position	1	S100B-	DAPI+		2765
96895.4	38870.3	9.49156	µm	Spot	Position	1	S100B-	DAPI+		2805
96918.3	38875.5	9.55739	µm	Spot	Position	1	S100B-	DAPI+		2806
96892.6	38916.6	8.46647	µm	Spot	Position	1	S100B-	DAPI+		2862
96897.4	38895.1	9.0675	µm	Spot	Position	1	S100B-	DAPI+		2868
96932.4	38913.9	8.65897	µm	Spot	Position	1	S100B-	DAPI+		2871
96920.8	38906.7	9.38143	µm	Spot	Position	1	S100B-	DAPI+		2875
96895.7	39014.8	9.49877	µm	Spot	Position	1	S100B-	DAPI+		2938
96917.2	38999.2	9.01871	µm	Spot	Position	1	S100B-	DAPI+		2940
96903.8	39022.6	9.35809	µm	Spot	Position	1	S100B-	DAPI+		2944
96896.3	38001.9	10.2758	µm	Spot	Position	1	S100B-	DAPI+		3240
96912.3	37991.7	10.0054	µm	Spot	Position	1	S100B-	DAPI+		3250
96925.9	38003.9	9.9491	µm	Spot	Position	1	S100B-	DAPI+		3251
96886.8	38010.8	10.1081	µm	Spot	Position	1	S100B-	DAPI+		3289
96880.2	38035.3	10.0295	µm	Spot	Position	1	S100B-	DAPI+		3290
96878.8	38030.5	10.4482	µm	Spot	Position	1	S100B-	DAPI+		3291
96876.7	38046	10.5028	µm	Spot	Position	1	S100B-	DAPI+		3293
96932.4	38048.1	9.61605	µm	Spot	Position	1	S100B-	DAPI+		3296
96909.5	38028.7	9.98536	µm	Spot	Position	1	S100B-	DAPI+		3298
96905	38019	10.766	µm	Spot	Position	1	S100B-	DAPI+		3300
96958.9	38030.6	9.66622	µm	Spot	Position	1	S100B-	DAPI+		3301
96933.3	38100.7	9.61982	µm	Spot	Position	1	S100B-	DAPI+		3347
96931.1	38071.5	10.3021	µm	Spot	Position	1	S100B-	DAPI+		3350
96931.7	38071.9	10.2947	µm	Spot	Position	1	S100B-	DAPI+		3351
96937	38062.2	10.7462	µm	Spot	Position	1	S100B-	DAPI+		3355
96952.9	38058.6	10.3751	µm	Spot	Position	1	S100B-	DAPI+		3357
96945.6	38063.9	10.6946	µm	Spot	Position	1	S100B-	DAPI+		3358
96936	38109.8	10.2157	µm	Spot	Position	1	S100B-	DAPI+		3421
96932.1	38113.6	10.33	µm	Spot	Position	1	S100B-	DAPI+		3423
96935.5	38127.9	10.3963	µm	Spot	Position	1	S100B-	DAPI+		3424
96941.2	38146	10.5666	µm	Spot	Position	1	S100B-	DAPI+		3430
96946.9	38144.5	9.98829	µm	Spot	Position	1	S100B-	DAPI+		3435
96941.4	38163.9	10.6986	µm	Spot	Position	1	S100B-	DAPI+		3500
96950	38165.9	9.90277	µm	Spot	Position	1	S100B-	DAPI+		3502
96943	38215.8	9.62711	µm	Spot	Position	1	S100B-	DAPI+		3576
96936.9	38194.7	10.1939	µm	Spot	Position	1	S100B-	DAPI+		3577
96939	38195.5	10.1731	µm	Spot	Position	1	S100B-	DAPI+		3578
96940.5	38220.5	9.96851	µm	Spot	Position	1	S100B-	DAPI+		3581
96951.2	38199.7	9.82984	µm	Spot	Position	1	S100B-	DAPI+		3585
96953.3	38218.5	9.78881	µm	Spot	Position	1	S100B-	DAPI+		3589
96947.4	38219.7	9.71254	µm	Spot	Position	1	S100B-	DAPI+		3590
96949.6	38221.4	9.93376	µm	Spot	Position	1	S100B-	DAPI+		3593
96951.3	38225.5	10.0062	µm	Spot	Position	1	S100B-	DAPI+		3594
96951.7	38209.9	10.3013	µm	Spot	Position	1	S100B-	DAPI+		3598
96949.3	38218	10.5034	µm	Spot	Position	1	S100B-	DAPI+		3599
96951.2	38217.6	10.5105	µm	Spot	Position	1	S100B-	DAPI+		3602
96952.7	38249.6	9.7757	µm	Spot	Position	1	S100B-	DAPI+		3690
96949.3	38284.9	9.87726	µm	Spot	Position	1	S100B-	DAPI+		3693
96948	38248.9	10.0879	µm	Spot	Position	1	S100B-	DAPI+		3695
96947.1	38251.2	10.488	µm	Spot	Position	1	S100B-	DAPI+		3698
96948.1	38251.4	10.4008	µm	Spot	Position	1	S100B-	DAPI+		3699
96946.8	38264.7	10.706	µm	Spot	Position	1	S100B-	DAPI+		3702
96953.1	38280.3	10.5099	µm	Spot	Position	1	S100B-	DAPI+		3704
96954.3	38297.9	9.76225	µm	Spot	Position	1	S100B-	DAPI+		3754
96956.2	38298	10.121	µm	Spot	Position	1	S100B-	DAPI+		3759
96945	38316.2	10.1677	µm	Spot	Position	1	S100B-	DAPI+		3760
96957.2	38355.3	9.84122	µm	Spot	Position	1	S100B-	DAPI+		3845
96945	38347.8	10.7018	µm	Spot	Position	1	S100B-	DAPI+		3852
96950.7	38369.6	10.7784	µm	Spot	Position	1	S100B-	DAPI+		3853
96954	38380.1	9.85521	µm	Spot	Position	1	S100B-	DAPI+		3922
96945.9	38408.9	9.8726	µm	Spot	Position	1	S100B-	DAPI+		3924
96946.7	38412.5	9.82987	µm	Spot	Position	1	S100B-	DAPI+		3925
96947.6	38382.1	10.1497	µm	Spot	Position	1	S100B-	DAPI+		3927
96948.3	38394.5	10.0038	µm	Spot	Position	1	S100B-	DAPI+		3928
96946.8	38416.9	10.4105	µm	Spot	Position	1	S100B-	DAPI+		3929
96948.8	38417.2	10.3408	µm	Spot	Position	1	S100B-	DAPI+		3930
96946.3	38396.9	10.5457	µm	Spot	Position	1	S100B-	DAPI+		3931
96942.2	38448.6	10.2178	µm	Spot	Position	1	S100B-	DAPI+		4001
96958.1	38439.5	9.71459	µm	Spot	Position	1	S100B-	DAPI+		4006
96946.8	38446.8	9.68036	µm	Spot	Position	1	S100B-	DAPI+		4007
96952.9	38449.6	9.71777	µm	Spot	Position	1	S100B-	DAPI+		4008
96945.6	38458.4	9.7489	µm	Spot	Position	1	S100B-	DAPI+		4009
96957.3	38436.4	9.95856	µm	Spot	Position	1	S100B-	DAPI+		4012
96951.9	38454.2	10.0867	µm	Spot	Position	1	S100B-	DAPI+		4013
96947.1	38466.7	10.257	µm	Spot	Position	1	S100B-	DAPI+		4016
96941.3	38498.4	9.67113	µm	Spot	Position	1	S100B-	DAPI+		4074
96938.7	38504.9	10.4643	µm	Spot	Position	1	S100B-	DAPI+		4082
96950.1	38490.4	9.77503	µm	Spot	Position	1	S100B-	DAPI+		4092
96945.2	38488.4	10.3957	µm	Spot	Position	1	S100B-	DAPI+		4096
96946	38494.9	10.2355	µm	Spot	Position	1	S100B-	DAPI+		4097
96947.3	38508.5	10.4264	µm	Spot	Position	1	S100B-	DAPI+		4098
96938.4	38521.7	9.64483	µm	Spot	Position	1	S100B-	DAPI+		4155
96938.5	38553.8	9.87567	µm	Spot	Position	1	S100B-	DAPI+		4157
96943.1	38557.8	9.72299	µm	Spot	Position	1	S100B-	DAPI+		4158
96934.6	38553	10.3551	µm	Spot	Position	1	S100B-	DAPI+		4171
96936.6	38548.8	10.736	µm	Spot	Position	1	S100B-	DAPI+		4175
96946.8	38558.4	9.91348	µm	Spot	Position	1	S100B-	DAPI+		4182
96945.9	38537	10.2128	µm	Spot	Position	1	S100B-	DAPI+		4186
96944.8	38538.3	10.3341	µm	Spot	Position	1	S100B-	DAPI+		4188
96950.7	38538.8	10.7465	µm	Spot	Position	1	S100B-	DAPI+		4198
96937	38569.7	9.91763	µm	Spot	Position	1	S100B-	DAPI+		4250
96936	38602.4	10.2618	µm	Spot	Position	1	S100B-	DAPI+		4258
96941.3	38606.4	10.2521	µm	Spot	Position	1	S100B-	DAPI+		4260
96931.8	38565.6	10.5817	µm	Spot	Position	1	S100B-	DAPI+		4261
96932.2	38566.7	10.6371	µm	Spot	Position	1	S100B-	DAPI+		4262
96941.4	38578.6	10.6167	µm	Spot	Position	1	S100B-	DAPI+		4266
96945.7	38572	10.0727	µm	Spot	Position	1	S100B-	DAPI+		4274
96923.7	38635.6	9.69168	µm	Spot	Position	1	S100B-	DAPI+		4324
96928.9	38651.6	9.6684	µm	Spot	Position	1	S100B-	DAPI+		4326
96934.6	38619.6	10.6141	µm	Spot	Position	1	S100B-	DAPI+		4342
96943.4	38686	9.66365	µm	Spot	Position	1	S100B-	DAPI+		4418
96941.4	38678.8	9.95113	µm	Spot	Position	1	S100B-	DAPI+		4421
96942	38689.8	10.3728	µm	Spot	Position	1	S100B-	DAPI+		4430
96933.5	38691.1	10.6303	µm	Spot	Position	1	S100B-	DAPI+		4433
96911.1	38725.2	9.62275	µm	Spot	Position	1	S100B-	DAPI+		4497
96920.7	38737.3	9.88042	µm	Spot	Position	1	S100B-	DAPI+		4499
96935.8	38739.1	9.8138	µm	Spot	Position	1	S100B-	DAPI+		4501
96918.2	38715.2	10.1489	µm	Spot	Position	1	S100B-	DAPI+		4504
96915.6	38715.4	10.3235	µm	Spot	Position	1	S100B-	DAPI+		4509
96926.1	38734.7	10.212	µm	Spot	Position	1	S100B-	DAPI+		4512
96929.2	38742.6	10.4002	µm	Spot	Position	1	S100B-	DAPI+		4514
96918.9	38711.2	10.5588	µm	Spot	Position	1	S100B-	DAPI+		4516
96929.3	38721.3	10.6773	µm	Spot	Position	1	S100B-	DAPI+		4517
96925.9	38729.2	10.6636	µm	Spot	Position	1	S100B-	DAPI+		4519
96922.6	38737.7	10.7443	µm	Spot	Position	1	S100B-	DAPI+		4520
96923.5	38750.3	9.67293	µm	Spot	Position	1	S100B-	DAPI+		4561
96921	38774.4	9.7882	µm	Spot	Position	1	S100B-	DAPI+		4563
96926.4	38751.5	9.91679	µm	Spot	Position	1	S100B-	DAPI+		4564
96914.8	38762.9	10.1244	µm	Spot	Position	1	S100B-	DAPI+		4565
96918.9	38765.7	10.077	µm	Spot	Position	1	S100B-	DAPI+		4566
96932.3	38766.7	10.0892	µm	Spot	Position	1	S100B-	DAPI+		4567
96909.7	38773.3	10.001	µm	Spot	Position	1	S100B-	DAPI+		4568
96915.6	38766.2	10.4929	µm	Spot	Position	1	S100B-	DAPI+		4571
96918	38769.6	10.2463	µm	Spot	Position	1	S100B-	DAPI+		4572
96919.8	38751.5	10.7928	µm	Spot	Position	1	S100B-	DAPI+		4574
96924.5	38754.8	10.5902	µm	Spot	Position	1	S100B-	DAPI+		4575
96912.6	38762	10.7033	µm	Spot	Position	1	S100B-	DAPI+		4577
96911	38784.1	10.6145	µm	Spot	Position	1	S100B-	DAPI+		4584
96898.4	38820.4	10.4143	µm	Spot	Position	1	S100B-	DAPI+		4647
96897.9	38831.8	10.2745	µm	Spot	Position	1	S100B-	DAPI+		4649
96914.7	38800.2	10.5667	µm	Spot	Position	1	S100B-	DAPI+		4650
96893.5	38843.1	9.68153	µm	Spot	Position	1	S100B-	DAPI+		4719
96891.3	38872.5	10.4694	µm	Spot	Position	1	S100B-	DAPI+		4737
96892.2	38846.2	10.7545	µm	Spot	Position	1	S100B-	DAPI+		4741
96894.5	38868.5	10.7732	µm	Spot	Position	1	S100B-	DAPI+		4743
96913.5	38851	9.72419	µm	Spot	Position	1	S100B-	DAPI+		4747
96914.3	38851.9	9.71324	µm	Spot	Position	1	S100B-	DAPI+		4748
96922.5	38880.2	9.72831	µm	Spot	Position	1	S100B-	DAPI+		4750
96928.1	38863.1	10.0011	µm	Spot	Position	1	S100B-	DAPI+		4752
96905.8	38868.8	10.0779	µm	Spot	Position	1	S100B-	DAPI+		4753
96919	38847.2	10.2864	µm	Spot	Position	1	S100B-	DAPI+		4756
96916.3	38847.6	10.3628	µm	Spot	Position	1	S100B-	DAPI+		4757
96913.4	38852.9	10.3621	µm	Spot	Position	1	S100B-	DAPI+		4758
96900.1	38854.2	10.4023	µm	Spot	Position	1	S100B-	DAPI+		4759
96920.3	38860.1	10.3854	µm	Spot	Position	1	S100B-	DAPI+		4760
96922.5	38862.9	10.4168	µm	Spot	Position	1	S100B-	DAPI+		4761
96922.5	38884.5	10.307	µm	Spot	Position	1	S100B-	DAPI+		4763
96915.7	38845.2	10.7445	µm	Spot	Position	1	S100B-	DAPI+		4764
96912.5	38849.3	10.6325	µm	Spot	Position	1	S100B-	DAPI+		4766
96912.1	38850.9	10.6675	µm	Spot	Position	1	S100B-	DAPI+		4767
96915.5	38851.7	10.7899	µm	Spot	Position	1	S100B-	DAPI+		4768
96895.5	38917.7	10.5104	µm	Spot	Position	1	S100B-	DAPI+		4849
96921.4	38888.4	9.75371	µm	Spot	Position	1	S100B-	DAPI+		4851
96929.9	38905.2	9.8726	µm	Spot	Position	1	S100B-	DAPI+		4855
96922.4	38911.6	9.67273	µm	Spot	Position	1	S100B-	DAPI+		4856
96934.1	38915.8	9.81888	µm	Spot	Position	1	S100B-	DAPI+		4857
96928	38912.7	10.0514	µm	Spot	Position	1	S100B-	DAPI+		4861
96937.1	38886.6	10.3528	µm	Spot	Position	1	S100B-	DAPI+		4863
96932	38888.1	10.4304	µm	Spot	Position	1	S100B-	DAPI+		4864
96925	38888.7	10.3077	µm	Spot	Position	1	S100B-	DAPI+		4865
96913.3	38899.5	10.3703	µm	Spot	Position	1	S100B-	DAPI+		4867
96923.5	38911.9	10.3213	µm	Spot	Position	1	S100B-	DAPI+		4868
96918.7	38887.3	10.765	µm	Spot	Position	1	S100B-	DAPI+		4871
96929.7	38915.3	10.6215	µm	Spot	Position	1	S100B-	DAPI+		4873
96920.8	38979.6	9.71393	µm	Spot	Position	1	S100B-	DAPI+		5029
96909.3	39028.4	10.7428	µm	Spot	Position	1	S100B-	DAPI+		5134
96921.1	37996	10.936	µm	Spot	Position	1	S100B-	DAPI+		5849
96916	38004.1	11.7495	µm	Spot	Position	1	S100B-	DAPI+		5853
96874.9	38033.3	11.1412	µm	Spot	Position	1	S100B-	DAPI+		5883
96897.8	38013.7	11.5383	µm	Spot	Position	1	S100B-	DAPI+		5886
96896.4	38024	11.85	µm	Spot	Position	1	S100B-	DAPI+		5887
96912.5	38012.7	11.2884	µm	Spot	Position	1	S100B-	DAPI+		5893
96904.3	38016.1	11.7089	µm	Spot	Position	1	S100B-	DAPI+		5900
96914.4	38044.2	11.9098	µm	Spot	Position	1	S100B-	DAPI+		5902
96950.9	38036.6	11.0982	µm	Spot	Position	1	S100B-	DAPI+		5903
96930.7	38097.9	11.0805	µm	Spot	Position	1	S100B-	DAPI+		5942
96922.5	38059.4	11.3261	µm	Spot	Position	1	S100B-	DAPI+		5943
96939.2	38143.5	10.8664	µm	Spot	Position	1	S100B-	DAPI+		5996
96933.4	38104.5	11.204	µm	Spot	Position	1	S100B-	DAPI+		5997
96939.6	38123.2	11.4969	µm	Spot	Position	1	S100B-	DAPI+		6000
96932.3	38135.9	11.4605	µm	Spot	Position	1	S100B-	DAPI+		6001
96927.3	38142.9	11.5581	µm	Spot	Position	1	S100B-	DAPI+		6002
96926.4	38106.9	11.9791	µm	Spot	Position	1	S100B-	DAPI+		6003
96944.1	38145.3	10.8895	µm	Spot	Position	1	S100B-	DAPI+		6010
96929.2	38153.4	10.9452	µm	Spot	Position	1	S100B-	DAPI+		6058
96934.7	38168.8	11.075	µm	Spot	Position	1	S100B-	DAPI+		6061
96943.9	38182.4	11.0197	µm	Spot	Position	1	S100B-	DAPI+		6064
96935.9	38164.8	11.3247	µm	Spot	Position	1	S100B-	DAPI+		6068
96933.6	38185.8	11.3196	µm	Spot	Position	1	S100B-	DAPI+		6070
96944.2	38163.8	10.9273	µm	Spot	Position	1	S100B-	DAPI+		6071
96946.4	38182.7	10.9943	µm	Spot	Position	1	S100B-	DAPI+		6076
96936.6	38229.3	11.213	µm	Spot	Position	1	S100B-	DAPI+		6138
96942.5	38221.3	11.4968	µm	Spot	Position	1	S100B-	DAPI+		6141
96941.3	38194.6	11.852	µm	Spot	Position	1	S100B-	DAPI+		6144
96951.5	38215.7	10.9357	µm	Spot	Position	1	S100B-	DAPI+		6147
96944.9	38218.4	10.9267	µm	Spot	Position	1	S100B-	DAPI+		6149
96949.5	38203.8	11.2224	µm	Spot	Position	1	S100B-	DAPI+		6150
96947.3	38235.7	11.4582	µm	Spot	Position	1	S100B-	DAPI+		6155
96952.2	38292	11.5515	µm	Spot	Position	1	S100B-	DAPI+		6306
96952.5	38296.8	11.5448	µm	Spot	Position	1	S100B-	DAPI+		6307
96952.6	38290.3	11.9795	µm	Spot	Position	1	S100B-	DAPI+		6310
96949.5	38293.9	11.9211	µm	Spot	Position	1	S100B-	DAPI+		6311
96948.3	38335.4	11.0684	µm	Spot	Position	1	S100B-	DAPI+		6361
96947.6	38375.2	11.3673	µm	Spot	Position	1	S100B-	DAPI+		6363
96947.6	38357.4	11.6366	µm	Spot	Position	1	S100B-	DAPI+		6366
96948.2	38377.5	11.5421	µm	Spot	Position	1	S100B-	DAPI+		6368
96946.6	38346.3	12.0052	µm	Spot	Position	1	S100B-	DAPI+		6369
96944.5	38409.6	10.9787	µm	Spot	Position	1	S100B-	DAPI+		6438
96946.7	38379.2	11.2629	µm	Spot	Position	1	S100B-	DAPI+		6439
96948.5	38423.3	11.4499	µm	Spot	Position	1	S100B-	DAPI+		6442
96948.1	38390.1	11.7656	µm	Spot	Position	1	S100B-	DAPI+		6445
96943	38469.7	11.8936	µm	Spot	Position	1	S100B-	DAPI+		6517
96952	38451.4	10.9159	µm	Spot	Position	1	S100B-	DAPI+		6519
96946	38451.8	10.9337	µm	Spot	Position	1	S100B-	DAPI+		6520
96950.9	38456.9	11.0372	µm	Spot	Position	1	S100B-	DAPI+		6521
96952.8	38439.1	11.3825	µm	Spot	Position	1	S100B-	DAPI+		6523
96951.5	38439.9	11.5136	µm	Spot	Position	1	S100B-	DAPI+		6527
96949.3	38427	11.9076	µm	Spot	Position	1	S100B-	DAPI+		6530
96943.8	38501.5	11.0635	µm	Spot	Position	1	S100B-	DAPI+		6619
96939.8	38471	11.4219	µm	Spot	Position	1	S100B-	DAPI+		6628
96938.7	38489.5	11.8898	µm	Spot	Position	1	S100B-	DAPI+		6634
96947.2	38487.9	11.2395	µm	Spot	Position	1	S100B-	DAPI+		6639
96937.9	38520.1	11.2972	µm	Spot	Position	1	S100B-	DAPI+		6695
96935.9	38541	11.879	µm	Spot	Position	1	S100B-	DAPI+		6705
96944.5	38560.5	10.9439	µm	Spot	Position	1	S100B-	DAPI+		6710
96938.3	38567.5	11.0044	µm	Spot	Position	1	S100B-	DAPI+		6772
96924.6	38609.1	10.875	µm	Spot	Position	1	S100B-	DAPI+		6774
96938.8	38571	11.1911	µm	Spot	Position	1	S100B-	DAPI+		6775
96940	38593.2	11.37	µm	Spot	Position	1	S100B-	DAPI+		6780
96937.3	38597.9	11.3683	µm	Spot	Position	1	S100B-	DAPI+		6781
96935.3	38576.9	11.4419	µm	Spot	Position	1	S100B-	DAPI+		6785
96933.7	38564.7	11.7589	µm	Spot	Position	1	S100B-	DAPI+		6790
96930	38569.4	11.7438	µm	Spot	Position	1	S100B-	DAPI+		6791
96922.1	38632.1	10.9179	µm	Spot	Position	1	S100B-	DAPI+		6846
96929.7	38615.8	11.1833	µm	Spot	Position	1	S100B-	DAPI+		6847
96929.2	38616.3	11.1812	µm	Spot	Position	1	S100B-	DAPI+		6848
96924.4	38652.3	11.3474	µm	Spot	Position	1	S100B-	DAPI+		6850
96926.5	38621.6	11.8814	µm	Spot	Position	1	S100B-	DAPI+		6854
96930.9	38640.5	11.954	µm	Spot	Position	1	S100B-	DAPI+		6857
96928.8	38676.3	11.4969	µm	Spot	Position	1	S100B-	DAPI+		6927
96930.3	38708.9	11.0251	µm	Spot	Position	1	S100B-	DAPI+		6995
96920.1	38742.1	11.0638	µm	Spot	Position	1	S100B-	DAPI+		6997
96918.5	38707.9	11.2299	µm	Spot	Position	1	S100B-	DAPI+		6998
96915.3	38722.6	11.3767	µm	Spot	Position	1	S100B-	DAPI+		7001
96921.8	38736	11.1162	µm	Spot	Position	1	S100B-	DAPI+		7003
96919.7	38716.6	11.6114	µm	Spot	Position	1	S100B-	DAPI+		7005
96910	38739.4	11.4556	µm	Spot	Position	1	S100B-	DAPI+		7006
96927.2	38732.4	11.9116	µm	Spot	Position	1	S100B-	DAPI+		7011
96922.3	38749.7	10.9106	µm	Spot	Position	1	S100B-	DAPI+		7064
96914.5	38765.7	10.8503	µm	Spot	Position	1	S100B-	DAPI+		7065
96927	38770.6	11.0957	µm	Spot	Position	1	S100B-	DAPI+		7066
96928.8	38773.3	10.8641	µm	Spot	Position	1	S100B-	DAPI+		7067
96924.9	38778.7	10.8653	µm	Spot	Position	1	S100B-	DAPI+		7068
96921.4	38780.9	10.9783	µm	Spot	Position	1	S100B-	DAPI+		7069
96917.6	38777.5	11.2687	µm	Spot	Position	1	S100B-	DAPI+		7072
96918.1	38790.3	11.1867	µm	Spot	Position	1	S100B-	DAPI+		7075
96929.1	38751.1	11.6292	µm	Spot	Position	1	S100B-	DAPI+		7076
96911.2	38759.7	11.6251	µm	Spot	Position	1	S100B-	DAPI+		7077
96912.5	38766.2	11.4199	µm	Spot	Position	1	S100B-	DAPI+		7078
96922.4	38777.5	11.587	µm	Spot	Position	1	S100B-	DAPI+		7080
96916.7	38779.1	11.5296	µm	Spot	Position	1	S100B-	DAPI+		7081
96920.2	38781.3	11.6036	µm	Spot	Position	1	S100B-	DAPI+		7083
96913.7	38793.8	11.5558	µm	Spot	Position	1	S100B-	DAPI+		7085
96911.7	38751.2	11.87	µm	Spot	Position	1	S100B-	DAPI+		7086
96917.2	38755	11.8235	µm	Spot	Position	1	S100B-	DAPI+		7087
96907.8	38762.3	11.8839	µm	Spot	Position	1	S100B-	DAPI+		7089
96919	38763.5	11.7797	µm	Spot	Position	1	S100B-	DAPI+		7090
96915.1	38768.6	11.9625	µm	Spot	Position	1	S100B-	DAPI+		7091
96922.2	38773.3	11.7462	µm	Spot	Position	1	S100B-	DAPI+		7092
96895.4	38839.6	11.1285	µm	Spot	Position	1	S100B-	DAPI+		7150
96911.3	38807.3	10.8717	µm	Spot	Position	1	S100B-	DAPI+		7162
96915.2	38795.2	11.2136	µm	Spot	Position	1	S100B-	DAPI+		7164
96913.7	38796.8	11.5606	µm	Spot	Position	1	S100B-	DAPI+		7166
96908.6	38810.6	11.5035	µm	Spot	Position	1	S100B-	DAPI+		7167
96921.4	38799.7	11.8769	µm	Spot	Position	1	S100B-	DAPI+		7169
96920.7	38800.3	11.9852	µm	Spot	Position	1	S100B-	DAPI+		7170
96896.2	38847.5	11.2262	µm	Spot	Position	1	S100B-	DAPI+		7251
96891.2	38862.5	11.4359	µm	Spot	Position	1	S100B-	DAPI+		7259
96893.3	38873	11.9077	µm	Spot	Position	1	S100B-	DAPI+		7265
96896.1	38880.2	11.7401	µm	Spot	Position	1	S100B-	DAPI+		7267
96914.8	38875.7	10.9709	µm	Spot	Position	1	S100B-	DAPI+		7270
96913.9	38881.1	10.9658	µm	Spot	Position	1	S100B-	DAPI+		7271
96909.3	38881.9	11.1622	µm	Spot	Position	1	S100B-	DAPI+		7273
96907.4	38883.1	11.3529	µm	Spot	Position	1	S100B-	DAPI+		7274
96903.5	38877.7	11.4831	µm	Spot	Position	1	S100B-	DAPI+		7278
96914.4	38841.9	11.9359	µm	Spot	Position	1	S100B-	DAPI+		7279
96914.9	38854.1	11.9656	µm	Spot	Position	1	S100B-	DAPI+		7281
96904.8	38881.3	11.7621	µm	Spot	Position	1	S100B-	DAPI+		7283
96892.3	38907.2	11.3268	µm	Spot	Position	1	S100B-	DAPI+		7349
96915.9	38895	11.0157	µm	Spot	Position	1	S100B-	DAPI+		7370
96930.1	38917.2	10.8855	µm	Spot	Position	1	S100B-	DAPI+		7372
96915.8	38887.1	11.2071	µm	Spot	Position	1	S100B-	DAPI+		7374
96920.3	38917.7	11.5088	µm	Spot	Position	1	S100B-	DAPI+		7381
96931.8	38919.7	11.586	µm	Spot	Position	1	S100B-	DAPI+		7382
96935.2	38942.2	11.6768	µm	Spot	Position	1	S100B-	DAPI+		7461
96928.7	38936.8	11.8519	µm	Spot	Position	1	S100B-	DAPI+		7463
96904.5	39002.6	11.4765	µm	Spot	Position	1	S100B-	DAPI+		7566
96902.5	39001.2	11.8713	µm	Spot	Position	1	S100B-	DAPI+		7568
96920	38021.8	12.0519	µm	Spot	Position	1	S100B-	DAPI+		8738
96933.1	38060.4	12.0092	µm	Spot	Position	1	S100B-	DAPI+		8759
96941.3	38093.4	12.2983	µm	Spot	Position	1	S100B-	DAPI+		8761
96927.9	38107.2	12.139	µm	Spot	Position	1	S100B-	DAPI+		8778
96928.7	38141.1	12.0465	µm	Spot	Position	1	S100B-	DAPI+		8780
96941.6	38192	12.2752	µm	Spot	Position	1	S100B-	DAPI+		8804
96930.3	38150.5	12.5329	µm	Spot	Position	1	S100B-	DAPI+		8805
96941	38183.6	12.3199	µm	Spot	Position	1	S100B-	DAPI+		8807
96947.2	38169	12.4501	µm	Spot	Position	1	S100B-	DAPI+		8809
96953.7	38206.6	12.0306	µm	Spot	Position	1	S100B-	DAPI+		8829
96943	38248.7	12.3994	µm	Spot	Position	1	S100B-	DAPI+		8860
96943.3	38252.4	12.4181	µm	Spot	Position	1	S100B-	DAPI+		8861
96942.1	38279.8	12.3885	µm	Spot	Position	1	S100B-	DAPI+		8863
96948.7	38272.2	12.8249	µm	Spot	Position	1	S100B-	DAPI+		8868
96948.3	38291.4	12.163	µm	Spot	Position	1	S100B-	DAPI+		8888
96944.3	38315	12.3484	µm	Spot	Position	1	S100B-	DAPI+		8893
96944.7	38358.7	12.0932	µm	Spot	Position	1	S100B-	DAPI+		8916
96949.7	38361.7	12.2547	µm	Spot	Position	1	S100B-	DAPI+		8917
96944.1	38362.3	12.6055	µm	Spot	Position	1	S100B-	DAPI+		8918
96943.4	38421.7	12.3736	µm	Spot	Position	1	S100B-	DAPI+		8948
96944.7	38393.6	12.2478	µm	Spot	Position	1	S100B-	DAPI+		8951
96942.3	38460.6	12.2086	µm	Spot	Position	1	S100B-	DAPI+		8981
96956.6	38427.1	12.1791	µm	Spot	Position	1	S100B-	DAPI+		8989
96949.4	38444.3	12.4029	µm	Spot	Position	1	S100B-	DAPI+		8992
96950	38440.1	12.6778	µm	Spot	Position	1	S100B-	DAPI+		8995
96945.4	38485.4	12.1759	µm	Spot	Position	1	S100B-	DAPI+		9038
96940.4	38528.1	12.3566	µm	Spot	Position	1	S100B-	DAPI+		9072
96943.7	38541.4	12.4139	µm	Spot	Position	1	S100B-	DAPI+		9073
96932.2	38554.1	12.7269	µm	Spot	Position	1	S100B-	DAPI+		9076
96940.5	38566.1	12.2367	µm	Spot	Position	1	S100B-	DAPI+		9121
96928.1	38577.7	12.2215	µm	Spot	Position	1	S100B-	DAPI+		9123
96935.2	38581.5	12.2982	µm	Spot	Position	1	S100B-	DAPI+		9124
96924.8	38602.8	12.1681	µm	Spot	Position	1	S100B-	DAPI+		9126
96942.9	38571.6	12.455	µm	Spot	Position	1	S100B-	DAPI+		9130
96935.6	38597.8	12.8418	µm	Spot	Position	1	S100B-	DAPI+		9136
96933.1	38640.7	12.1814	µm	Spot	Position	1	S100B-	DAPI+		9179
96927.5	38653	12.081	µm	Spot	Position	1	S100B-	DAPI+		9180
96924.4	38618.9	12.4092	µm	Spot	Position	1	S100B-	DAPI+		9181
96932.4	38618.9	12.5348	µm	Spot	Position	1	S100B-	DAPI+		9182
96925.2	38654.5	12.7227	µm	Spot	Position	1	S100B-	DAPI+		9186
96935.8	38637.6	12.9447	µm	Spot	Position	1	S100B-	DAPI+		9188
96932.8	38670	12.4461	µm	Spot	Position	1	S100B-	DAPI+		9233
96928.7	38742.9	12.4235	µm	Spot	Position	1	S100B-	DAPI+		9294
96919.3	38744.1	12.3788	µm	Spot	Position	1	S100B-	DAPI+		9295
96927	38737.2	12.8928	µm	Spot	Position	1	S100B-	DAPI+		9298
96930.1	38737.2	12.7259	µm	Spot	Position	1	S100B-	DAPI+		9299
96918.6	38747	12.6223	µm	Spot	Position	1	S100B-	DAPI+		9300
96923.5	38772.3	12.196	µm	Spot	Position	1	S100B-	DAPI+		9355
96907.4	38777.1	12.1481	µm	Spot	Position	1	S100B-	DAPI+		9356
96922.3	38753.5	12.3775	µm	Spot	Position	1	S100B-	DAPI+		9359
96925.1	38766.7	12.5639	µm	Spot	Position	1	S100B-	DAPI+		9361
96926.6	38767.4	12.3729	µm	Spot	Position	1	S100B-	DAPI+		9362
96922.8	38768	12.4521	µm	Spot	Position	1	S100B-	DAPI+		9363
96927.3	38748	12.7477	µm	Spot	Position	1	S100B-	DAPI+		9365
96914	38773.3	12.6874	µm	Spot	Position	1	S100B-	DAPI+		9366
96919.2	38776.6	12.627	µm	Spot	Position	1	S100B-	DAPI+		9367
96917.1	38787.1	13.1618	µm	Spot	Position	1	S100B-	DAPI+		9369
96915.2	38790.8	13.1539	µm	Spot	Position	1	S100B-	DAPI+		9371
96907.6	38804	12.5959	µm	Spot	Position	1	S100B-	DAPI+		9445
96914.3	38804.8	12.7876	µm	Spot	Position	1	S100B-	DAPI+		9448
96900.3	38828	12.998	µm	Spot	Position	1	S100B-	DAPI+		9451
96895.1	38840.8	12.4884	µm	Spot	Position	1	S100B-	DAPI+		9511
96920.4	38878.5	12.6024	µm	Spot	Position	1	S100B-	DAPI+		9528
96910.7	38852.3	12.697	µm	Spot	Position	1	S100B-	DAPI+		9530
96916.3	38853.6	12.7608	µm	Spot	Position	1	S100B-	DAPI+		9531
96922.1	38880.7	13.1116	µm	Spot	Position	1	S100B-	DAPI+		9536
96906.2	38907.9	12.8718	µm	Spot	Position	1	S100B-	DAPI+		9604
96898.1	38938.7	12.2275	µm	Spot	Position	1	S100B-	DAPI+		9688
96933	38970.6	12.936	µm	Spot	Position	1	S100B-	DAPI+		9697
96905.4	38991.8	13.1922	µm	Spot	Position	1	S100B-	DAPI+		9785
96915.4	39006.1	13.0938	µm	Spot	Position	1	S100B-	DAPI+		9787
96900	39009	12.9345	µm	Spot	Position	1	S100B-	DAPI+		9788
96914.1	39029.3	12.1695	µm	Spot	Position	1	S100B-	DAPI+		9897
96927.1	38757.5	13.2304	µm	Spot	Position	1	S100B-	DAPI+		10831
96900	38814	13.3864	µm	Spot	Position	1	S100B-	DAPI+		10845
96897.4	38873.8	13.4321	µm	Spot	Position	1	S100B-	DAPI+		10862
96896	38910.6	13.3144	µm	Spot	Position	1	S100B-	DAPI+		10880
96911.6	38895.3	13.4073	µm	Spot	Position	1	S100B-	DAPI+		10883
96931.2	38981.4	13.3746	µm	Spot	Position	1	S100B-	DAPI+		10981
96928	38995	13.3422	µm	Spot	Position	1	S100B-	DAPI+		10983
96912	39026.1	13.3619	µm	Spot	Position	1	S100B-	DAPI+		11039
97115.2	39182.7	8.10261	µm	Spot	Position	1		DAPI-	Class A	1566
97322.5	39309.9	7.26145	µm	Spot	Position	1		DAPI-	Class A	1593
97047	39132.1	9.00413	µm	Spot	Position	1		DAPI-	Class A	3045
97112.2	39195.3	9.58891	µm	Spot	Position	1		DAPI-	Class A	3078
97369.1	39329.2	9.46083	µm	Spot	Position	1		DAPI-	Class A	3137
97522.1	39337.6	8.87467	µm	Spot	Position	1		DAPI-	Class A	3140
96943.6	38964.3	9.65024	µm	Spot	Position	1		DAPI-	Class A	4945
96969.3	39065.1	10.2815	µm	Spot	Position	1		DAPI-	Class A	5141
96951.6	39066.1	10.6992	µm	Spot	Position	1		DAPI-	Class A	5145
97012.1	39061.3	10.6469	µm	Spot	Position	1		DAPI-	Class A	5157
96976.9	39081.3	10.6143	µm	Spot	Position	1		DAPI-	Class A	5254
97032.7	39083.3	10.1243	µm	Spot	Position	1		DAPI-	Class A	5256
97020.3	39120.4	9.66931	µm	Spot	Position	1		DAPI-	Class A	5347
97075.8	39165.4	10.1392	µm	Spot	Position	1		DAPI-	Class A	5426
97120.7	39202.9	9.86282	µm	Spot	Position	1		DAPI-	Class A	5429
97171.9	39220.9	10.1557	µm	Spot	Position	1		DAPI-	Class A	5528
97337.1	39301.9	10.3925	µm	Spot	Position	1		DAPI-	Class A	5654
97463.1	39321.3	10.5546	µm	Spot	Position	1		DAPI-	Class A	5669
97034.5	39090.8	11.2334	µm	Spot	Position	1		DAPI-	Class A	7823
97070.9	39133	11.375	µm	Spot	Position	1		DAPI-	Class A	7967
97076.7	39155.7	11.6018	µm	Spot	Position	1		DAPI-	Class A	7968
97071.5	39133.9	11.8402	µm	Spot	Position	1		DAPI-	Class A	7970
97082.8	39154.6	11.1976	µm	Spot	Position	1		DAPI-	Class A	7976
97110.9	39163.5	10.8229	µm	Spot	Position	1		DAPI-	Class A	8094
97269.6	39275.8	11.6966	µm	Spot	Position	1		DAPI-	Class A	8359
97342	39298.2	11.6756	µm	Spot	Position	1		DAPI-	Class A	8372
96951	39064.7	12.0777	µm	Spot	Position	1		DAPI-	Class A	9907
97070.5	39130	13.1088	µm	Spot	Position	1		DAPI-	Class A	10142
97115.9	39169	12.7467	µm	Spot	Position	1		DAPI-	Class A	10260
97209	39248.7	12.5387	µm	Spot	Position	1		DAPI-	Class A	10373
97227.8	39244.6	12.8657	µm	Spot	Position	1		DAPI-	Class A	10378
97226.9	39250.7	12.6655	µm	Spot	Position	1		DAPI-	Class A	10379
97250.3	39258.1	12.3426	µm	Spot	Position	1		DAPI-	Class A	10467
97283	39276.5	12.4142	µm	Spot	Position	1		DAPI-	Class A	10483
97282.8	39277.3	12.4551	µm	Spot	Position	1		DAPI-	Class A	10484
97087.1	39171.6	13.5285	µm	Spot	Position	1		DAPI-	Class A	11293
97322.5	39294	14.1877	µm	Spot	Position	1		DAPI-	Class A	11535
97408.8	39317.5	13.6474	µm	Spot	Position	1		DAPI-	Class A	11639
97489	39366.2	13.5129	µm	Spot	Position	1		DAPI-	Class A	11733
97512.2	39353.6	13.619	µm	Spot	Position	1		DAPI-	Class A	11735
96914.9	39028.4	2.48804	µm	Spot	Position	1	S100B+	DAPI+	Class A	39
96932.1	39045.5	5.85544	µm	Spot	Position	1	S100B+	DAPI+	Class A	284
96947.6	39002.5	7.90727	µm	Spot	Position	1	S100B+	DAPI+	Class A	1555
97277.3	39283.1	7.47966	µm	Spot	Position	1	S100B+	DAPI+	Class A	1587
97275.8	39283.4	7.97804	µm	Spot	Position	1	S100B+	DAPI+	Class A	1588
97311.6	39304.3	7.29294	µm	Spot	Position	1	S100B+	DAPI+	Class A	1590
96933.1	38990.4	9.4603	µm	Spot	Position	1	S100B+	DAPI+	Class A	2942
96919.5	39037.1	9.60054	µm	Spot	Position	1	S100B+	DAPI+	Class A	2979
96955.1	39052.8	9.29992	µm	Spot	Position	1	S100B+	DAPI+	Class A	2985
97046.4	39120.9	8.82131	µm	Spot	Position	1	S100B+	DAPI+	Class A	3044
97121.9	39196.1	9.12491	µm	Spot	Position	1	S100B+	DAPI+	Class A	3077
97154	39211.6	9.57263	µm	Spot	Position	1	S100B+	DAPI+	Class A	3087
97306.5	39309.5	8.57787	µm	Spot	Position	1	S100B+	DAPI+	Class A	3123
97322.7	39304	8.61144	µm	Spot	Position	1	S100B+	DAPI+	Class A	3129
97351.3	39314.5	9.34339	µm	Spot	Position	1	S100B+	DAPI+	Class A	3135
97452	39336.1	9.49247	µm	Spot	Position	1	S100B+	DAPI+	Class A	3138
96954.3	38974.6	10.345	µm	Spot	Position	1	S100B+	DAPI+	Class A	4963
96927.3	39026.6	9.74823	µm	Spot	Position	1	S100B+	DAPI+	Class A	5129
96936.5	39034.7	9.78528	µm	Spot	Position	1	S100B+	DAPI+	Class A	5130
96939	39046.8	10.0638	µm	Spot	Position	1	S100B+	DAPI+	Class A	5131
96939.1	39051.1	10.009	µm	Spot	Position	1	S100B+	DAPI+	Class A	5132
96930.9	39035.2	10.5734	µm	Spot	Position	1	S100B+	DAPI+	Class A	5136
96948.7	39031.1	9.76052	µm	Spot	Position	1	S100B+	DAPI+	Class A	5138
96949.4	39045	10.2286	µm	Spot	Position	1	S100B+	DAPI+	Class A	5139
96989.5	39067.3	10.5766	µm	Spot	Position	1	S100B+	DAPI+	Class A	5146
96998	39060.6	10.2631	µm	Spot	Position	1	S100B+	DAPI+	Class A	5152
97008.4	39077.7	10.1338	µm	Spot	Position	1	S100B+	DAPI+	Class A	5255
97044.3	39115.5	10.767	µm	Spot	Position	1	S100B+	DAPI+	Class A	5262
97030.9	39124.2	10.7936	µm	Spot	Position	1	S100B+	DAPI+	Class A	5352
97041.8	39122.8	10.4874	µm	Spot	Position	1	S100B+	DAPI+	Class A	5360
97063.4	39127.9	10.7269	µm	Spot	Position	1	S100B+	DAPI+	Class A	5361
97059.7	39133.8	10.6722	µm	Spot	Position	1	S100B+	DAPI+	Class A	5362
97116.4	39199.3	10.0852	µm	Spot	Position	1	S100B+	DAPI+	Class A	5434
97113.1	39178.8	10.2931	µm	Spot	Position	1	S100B+	DAPI+	Class A	5437
97118.9	39188.5	10.2966	µm	Spot	Position	1	S100B+	DAPI+	Class A	5438
97150.9	39210.2	10.1307	µm	Spot	Position	1	S100B+	DAPI+	Class A	5526
97287.4	39287.7	9.98255	µm	Spot	Position	1	S100B+	DAPI+	Class A	5606
97314.8	39305.5	9.77834	µm	Spot	Position	1	S100B+	DAPI+	Class A	5651
97316.9	39314.2	10.0824	µm	Spot	Position	1	S100B+	DAPI+	Class A	5652
97319	39302.1	10.4192	µm	Spot	Position	1	S100B+	DAPI+	Class A	5655
97404.1	39326.2	9.83284	µm	Spot	Position	1	S100B+	DAPI+	Class A	5658
97419.5	39324.8	10.2503	µm	Spot	Position	1	S100B+	DAPI+	Class A	5663
97446	39337.6	10.785	µm	Spot	Position	1	S100B+	DAPI+	Class A	5665
96958.4	38975.1	10.9378	µm	Spot	Position	1	S100B+	DAPI+	Class A	7472
96929.2	39001.1	10.9991	µm	Spot	Position	1	S100B+	DAPI+	Class A	7561
96941.1	39003	11.4047	µm	Spot	Position	1	S100B+	DAPI+	Class A	7564
96942.8	39015.9	11.9778	µm	Spot	Position	1	S100B+	DAPI+	Class A	7569
96961.8	38993.5	10.8998	µm	Spot	Position	1	S100B+	DAPI+	Class A	7571
96947.2	39014.5	10.992	µm	Spot	Position	1	S100B+	DAPI+	Class A	7572
96966.3	39001.2	11.356	µm	Spot	Position	1	S100B+	DAPI+	Class A	7574
96959.8	39010.6	11.6711	µm	Spot	Position	1	S100B+	DAPI+	Class A	7577
96958.9	39004.8	11.7614	µm	Spot	Position	1	S100B+	DAPI+	Class A	7579
96951.5	39019.9	11.7405	µm	Spot	Position	1	S100B+	DAPI+	Class A	7580
96942.2	39035.6	11.3376	µm	Spot	Position	1	S100B+	DAPI+	Class A	7686
96930.1	39041.2	11.3399	µm	Spot	Position	1	S100B+	DAPI+	Class A	7687
96919.2	39031.3	11.986	µm	Spot	Position	1	S100B+	DAPI+	Class A	7689
96941.7	39038.4	11.8142	µm	Spot	Position	1	S100B+	DAPI+	Class A	7690
96988.1	39047	10.9871	µm	Spot	Position	1	S100B+	DAPI+	Class A	7692
96979.2	39050.1	11.0147	µm	Spot	Position	1	S100B+	DAPI+	Class A	7693
96973	39054.9	10.9248	µm	Spot	Position	1	S100B+	DAPI+	Class A	7694
96959.5	39059.3	11.3802	µm	Spot	Position	1	S100B+	DAPI+	Class A	7695
96972.6	39033.6	11.5214	µm	Spot	Position	1	S100B+	DAPI+	Class A	7697
96959.4	39052.8	11.6083	µm	Spot	Position	1	S100B+	DAPI+	Class A	7698
96958.3	39056.3	11.5594	µm	Spot	Position	1	S100B+	DAPI+	Class A	7699
96975.3	39066.1	11.5285	µm	Spot	Position	1	S100B+	DAPI+	Class A	7701
96947.1	39038.4	11.8406	µm	Spot	Position	1	S100B+	DAPI+	Class A	7702
96952	39048.9	11.8438	µm	Spot	Position	1	S100B+	DAPI+	Class A	7705
96956.2	39049.7	11.7332	µm	Spot	Position	1	S100B+	DAPI+	Class A	7706
97000.4	39057.5	10.8661	µm	Spot	Position	1	S100B+	DAPI+	Class A	7709
97004.7	39041.8	11.3442	µm	Spot	Position	1	S100B+	DAPI+	Class A	7713
97003.8	39063.8	11.544	µm	Spot	Position	1	S100B+	DAPI+	Class A	7715
97009.1	39073.9	11.7185	µm	Spot	Position	1	S100B+	DAPI+	Class A	7824
97019.1	39079.5	11.811	µm	Spot	Position	1	S100B+	DAPI+	Class A	7825
97003.8	39106.2	11.7346	µm	Spot	Position	1	S100B+	DAPI+	Class A	7826
97053.1	39132.1	10.9076	µm	Spot	Position	1	S100B+	DAPI+	Class A	7964
97076.1	39144.1	10.928	µm	Spot	Position	1	S100B+	DAPI+	Class A	7965
97048	39129.8	11.1142	µm	Spot	Position	1	S100B+	DAPI+	Class A	7966
97063.6	39125.4	11.9333	µm	Spot	Position	1	S100B+	DAPI+	Class A	7969
97092.8	39163	11.1102	µm	Spot	Position	1	S100B+	DAPI+	Class A	7977
97111	39179.7	11.5725	µm	Spot	Position	1	S100B+	DAPI+	Class A	8099
97114.1	39176.9	11.9229	µm	Spot	Position	1	S100B+	DAPI+	Class A	8102
97138.1	39194.9	11.1802	µm	Spot	Position	1	S100B+	DAPI+	Class A	8105
97246.3	39254.9	11.6429	µm	Spot	Position	1	S100B+	DAPI+	Class A	8227
97245.3	39255.7	11.9268	µm	Spot	Position	1	S100B+	DAPI+	Class A	8229
97280.1	39286.5	10.9725	µm	Spot	Position	1	S100B+	DAPI+	Class A	8353
97286.3	39278	11.3041	µm	Spot	Position	1	S100B+	DAPI+	Class A	8355
97274.9	39269.7	11.5392	µm	Spot	Position	1	S100B+	DAPI+	Class A	8358
97348.9	39321.8	11.7753	µm	Spot	Position	1	S100B+	DAPI+	Class A	8494
97365.2	39314.5	11.1897	µm	Spot	Position	1	S100B+	DAPI+	Class A	8498
97403.6	39327.8	11.2423	µm	Spot	Position	1	S100B+	DAPI+	Class A	8499
97415.5	39325.7	10.9606	µm	Spot	Position	1	S100B+	DAPI+	Class A	8502
97418.8	39336.5	10.9583	µm	Spot	Position	1	S100B+	DAPI+	Class A	8503
97432.2	39329.9	11.1967	µm	Spot	Position	1	S100B+	DAPI+	Class A	8508
97445.8	39338.9	11.3613	µm	Spot	Position	1	S100B+	DAPI+	Class A	8509
97432.2	39345.4	11.2144	µm	Spot	Position	1	S100B+	DAPI+	Class A	8510
97419.1	39333.1	11.4133	µm	Spot	Position	1	S100B+	DAPI+	Class A	8512
97431.7	39324.8	11.8972	µm	Spot	Position	1	S100B+	DAPI+	Class A	8513
97428.3	39332.8	11.8522	µm	Spot	Position	1	S100B+	DAPI+	Class A	8514
97463.4	39341.1	11.168	µm	Spot	Position	1	S100B+	DAPI+	Class A	8517
96939	39012.6	12.3149	µm	Spot	Position	1	S100B+	DAPI+	Class A	9779
96930.4	39024	12.5653	µm	Spot	Position	1	S100B+	DAPI+	Class A	9781
96930.2	39013.7	12.6889	µm	Spot	Position	1	S100B+	DAPI+	Class A	9783
96933.3	39023.3	12.6579	µm	Spot	Position	1	S100B+	DAPI+	Class A	9784
96945.5	39003.9	12.0408	µm	Spot	Position	1	S100B+	DAPI+	Class A	9790
96953	39004.5	12.2407	µm	Spot	Position	1	S100B+	DAPI+	Class A	9791
96957.8	39012.4	13.1293	µm	Spot	Position	1	S100B+	DAPI+	Class A	9800
96928.1	39033.4	12.2341	µm	Spot	Position	1	S100B+	DAPI+	Class A	9898
96932.8	39042	12.0098	µm	Spot	Position	1	S100B+	DAPI+	Class A	9899
96943.3	39043.3	12.5533	µm	Spot	Position	1	S100B+	DAPI+	Class A	9901
96975.1	39042.6	12.1603	µm	Spot	Position	1	S100B+	DAPI+	Class A	9904
96968	39060	12.0506	µm	Spot	Position	1	S100B+	DAPI+	Class A	9905
96967.4	39060.8	12.3015	µm	Spot	Position	1	S100B+	DAPI+	Class A	9906
96978.6	39046.6	12.3977	µm	Spot	Position	1	S100B+	DAPI+	Class A	9908
96965.3	39049.2	12.4933	µm	Spot	Position	1	S100B+	DAPI+	Class A	9909
96978.6	39068.7	12.3244	µm	Spot	Position	1	S100B+	DAPI+	Class A	9910
96952.7	39043.5	12.8851	µm	Spot	Position	1	S100B+	DAPI+	Class A	9912
96979.4	39059.9	13.2066	µm	Spot	Position	1	S100B+	DAPI+	Class A	9913
96995.2	39049	12.8247	µm	Spot	Position	1	S100B+	DAPI+	Class A	9919
96995.6	39057.7	12.6482	µm	Spot	Position	1	S100B+	DAPI+	Class A	9920
97021.9	39103.7	12.4337	µm	Spot	Position	1	S100B+	DAPI+	Class A	10010
97032.2	39110.1	12.3605	µm	Spot	Position	1	S100B+	DAPI+	Class A	10011
96996.8	39072.7	12.8871	µm	Spot	Position	1	S100B+	DAPI+	Class A	10012
96991.3	39080.2	12.6287	µm	Spot	Position	1	S100B+	DAPI+	Class A	10013
97031.2	39110.7	12.7788	µm	Spot	Position	1	S100B+	DAPI+	Class A	10014
97026	39111.6	12.8437	µm	Spot	Position	1	S100B+	DAPI+	Class A	10015
97044.4	39106.3	12.0416	µm	Spot	Position	1	S100B+	DAPI+	Class A	10017
97035.7	39120.1	12.8213	µm	Spot	Position	1	S100B+	DAPI+	Class A	10136
97091.4	39154.8	12.1978	µm	Spot	Position	1	S100B+	DAPI+	Class A	10145
97097.7	39160	12.3815	µm	Spot	Position	1	S100B+	DAPI+	Class A	10150
97124.8	39184.3	12.996	µm	Spot	Position	1	S100B+	DAPI+	Class A	10263
97120	39185.4	13.1143	µm	Spot	Position	1	S100B+	DAPI+	Class A	10264
97144.1	39188.5	12.3321	µm	Spot	Position	1	S100B+	DAPI+	Class A	10267
97132.6	39196.7	13.0957	µm	Spot	Position	1	S100B+	DAPI+	Class A	10268
97248.7	39254	12.343	µm	Spot	Position	1	S100B+	DAPI+	Class A	10377
97324.9	39302.8	12.0232	µm	Spot	Position	1	S100B+	DAPI+	Class A	10605
97362	39322.4	12.358	µm	Spot	Position	1	S100B+	DAPI+	Class A	10608
97425.4	39328.5	12.1373	µm	Spot	Position	1	S100B+	DAPI+	Class A	10609
97433.4	39347.3	12.1145	µm	Spot	Position	1	S100B+	DAPI+	Class A	10610
97426.4	39327.3	12.503	µm	Spot	Position	1	S100B+	DAPI+	Class A	10612
97424.6	39328.7	12.4355	µm	Spot	Position	1	S100B+	DAPI+	Class A	10613
97444.5	39334.1	12.5258	µm	Spot	Position	1	S100B+	DAPI+	Class A	10614
97405.8	39318	12.7202	µm	Spot	Position	1	S100B+	DAPI+	Class A	10615
97425.4	39326.9	12.7384	µm	Spot	Position	1	S100B+	DAPI+	Class A	10616
97426.7	39329.3	12.7209	µm	Spot	Position	1	S100B+	DAPI+	Class A	10617
97428	39331.1	12.8688	µm	Spot	Position	1	S100B+	DAPI+	Class A	10618
97428.6	39336.6	12.6899	µm	Spot	Position	1	S100B+	DAPI+	Class A	10619
97413.6	39314.7	13.0728	µm	Spot	Position	1	S100B+	DAPI+	Class A	10620
97442.4	39335.6	13.0207	µm	Spot	Position	1	S100B+	DAPI+	Class A	10622
97429.6	39347	13.0646	µm	Spot	Position	1	S100B+	DAPI+	Class A	10623
97481.6	39333.6	12.2489	µm	Spot	Position	1	S100B+	DAPI+	Class A	10624
97482.9	39344.9	12.5238	µm	Spot	Position	1	S100B+	DAPI+	Class A	10625
97462	39337.8	13.0316	µm	Spot	Position	1	S100B+	DAPI+	Class A	10626
96930.8	38999	13.2193	µm	Spot	Position	1	S100B+	DAPI+	Class A	10984
96935.7	38985.9	13.7409	µm	Spot	Position	1	S100B+	DAPI+	Class A	10985
96955	38982.3	13.2806	µm	Spot	Position	1	S100B+	DAPI+	Class A	10989
96957.4	38997.1	13.6857	µm	Spot	Position	1	S100B+	DAPI+	Class A	10995
96958.1	39009.9	13.6581	µm	Spot	Position	1	S100B+	DAPI+	Class A	10996
96963.9	39017.5	13.5137	µm	Spot	Position	1	S100B+	DAPI+	Class A	10997
96955	39019	13.8939	µm	Spot	Position	1	S100B+	DAPI+	Class A	11000
96957.3	39053	13.476	µm	Spot	Position	1	S100B+	DAPI+	Class A	11042
96972.8	39058	13.2635	µm	Spot	Position	1	S100B+	DAPI+	Class A	11043
96980.8	39065.8	13.2605	µm	Spot	Position	1	S100B+	DAPI+	Class A	11045
96948.4	39028.5	13.7783	µm	Spot	Position	1	S100B+	DAPI+	Class A	11046
96964.5	39052	13.7976	µm	Spot	Position	1	S100B+	DAPI+	Class A	11048
96965.4	39057.2	13.889	µm	Spot	Position	1	S100B+	DAPI+	Class A	11049
96993.7	39056.5	13.2092	µm	Spot	Position	1	S100B+	DAPI+	Class A	11051
96999.1	39069.2	13.7075	µm	Spot	Position	1	S100B+	DAPI+	Class A	11055
97032.9	39108.8	13.369	µm	Spot	Position	1	S100B+	DAPI+	Class A	11112
96999	39072.7	13.7926	µm	Spot	Position	1	S100B+	DAPI+	Class A	11113
97005	39102.9	14.0901	µm	Spot	Position	1	S100B+	DAPI+	Class A	11116
97031.3	39109.2	14.1195	µm	Spot	Position	1	S100B+	DAPI+	Class A	11119
97033.3	39118.9	14.3899	µm	Spot	Position	1	S100B+	DAPI+	Class A	11199
97055.4	39121.3	13.7476	µm	Spot	Position	1	S100B+	DAPI+	Class A	11202
97067.6	39142.1	13.6438	µm	Spot	Position	1	S100B+	DAPI+	Class A	11203
97093.5	39149.1	13.6871	µm	Spot	Position	1	S100B+	DAPI+	Class A	11209
97126.2	39177.4	14.1109	µm	Spot	Position	1	S100B+	DAPI+	Class A	11296
97138.2	39183.5	13.4291	µm	Spot	Position	1	S100B+	DAPI+	Class A	11297
97131.8	39187.1	13.9775	µm	Spot	Position	1	S100B+	DAPI+	Class A	11298
97131.9	39189.8	13.9401	µm	Spot	Position	1	S100B+	DAPI+	Class A	11299
97134.4	39188.9	14.2489	µm	Spot	Position	1	S100B+	DAPI+	Class A	11300
97261.7	39268.1	13.3815	µm	Spot	Position	1	S100B+	DAPI+	Class A	11505
97300.1	39301.9	13.6353	µm	Spot	Position	1	S100B+	DAPI+	Class A	11513
97296.2	39286.5	13.9718	µm	Spot	Position	1	S100B+	DAPI+	Class A	11518
97280.2	39281.3	14.3074	µm	Spot	Position	1	S100B+	DAPI+	Class A	11520
97358.9	39305.7	13.7356	µm	Spot	Position	1	S100B+	DAPI+	Class A	11627
97373.1	39321.3	13.4451	µm	Spot	Position	1	S100B+	DAPI+	Class A	11629
97374.7	39306.7	14.3329	µm	Spot	Position	1	S100B+	DAPI+	Class A	11632
97407.9	39312	13.3175	µm	Spot	Position	1	S100B+	DAPI+	Class A	11633
97435.7	39324	13.3118	µm	Spot	Position	1	S100B+	DAPI+	Class A	11634
97419.7	39325.8	13.3568	µm	Spot	Position	1	S100B+	DAPI+	Class A	11635
97436.2	39345.8	13.2451	µm	Spot	Position	1	S100B+	DAPI+	Class A	11636
97434.6	39329.8	13.7605	µm	Spot	Position	1	S100B+	DAPI+	Class A	11640
97431.3	39343.4	13.5543	µm	Spot	Position	1	S100B+	DAPI+	Class A	11641
97445	39322.8	13.9379	µm	Spot	Position	1	S100B+	DAPI+	Class A	11642
97418.7	39325.3	13.9666	µm	Spot	Position	1	S100B+	DAPI+	Class A	11643
97438.4	39327.7	13.8456	µm	Spot	Position	1	S100B+	DAPI+	Class A	11644
97456.4	39330.9	13.7823	µm	Spot	Position	1	S100B+	DAPI+	Class A	11649
97464.9	39349.6	13.3095	µm	Spot	Position	1	S100B+	DAPI+	Class A	11729
97269.7	39276.6	14.7342	µm	Spot	Position	1	S100B+	DAPI+	Class A	11850
97373.2	39305.8	14.5233	µm	Spot	Position	1	S100B+	DAPI+	Class A	11868
97164.1	39211.8	3.96574	µm	Spot	Position	1	S100B-	DAPI+	Class A	111
96934.2	39038.3	8.28225	µm	Spot	Position	1	S100B-	DAPI+	Class A	1558
97052.6	39137.8	8.38419	µm	Spot	Position	1	S100B-	DAPI+	Class A	1564
97128	39202.9	8.28704	µm	Spot	Position	1	S100B-	DAPI+	Class A	1567
97129.3	39208.3	7.41931	µm	Spot	Position	1	S100B-	DAPI+	Class A	1568
97312.7	39317.2	8.09766	µm	Spot	Position	1	S100B-	DAPI+	Class A	1591
97307.1	39307.4	8.18673	µm	Spot	Position	1	S100B-	DAPI+	Class A	1592
97336.3	39308.9	8.2776	µm	Spot	Position	1	S100B-	DAPI+	Class A	1594
97397.4	39328.2	7.73455	µm	Spot	Position	1	S100B-	DAPI+	Class A	1595
96925.7	39034.8	8.8119	µm	Spot	Position	1	S100B-	DAPI+	Class A	2977
96925.8	39036.6	9.28984	µm	Spot	Position	1	S100B-	DAPI+	Class A	2978
96922.8	39038.6	9.48337	µm	Spot	Position	1	S100B-	DAPI+	Class A	2980
96951.2	39063.8	8.68774	µm	Spot	Position	1	S100B-	DAPI+	Class A	2981
96956.5	39065.1	8.62471	µm	Spot	Position	1	S100B-	DAPI+	Class A	2982
96950	39055.6	8.9108	µm	Spot	Position	1	S100B-	DAPI+	Class A	2984
96999.3	39069.9	8.48753	µm	Spot	Position	1	S100B-	DAPI+	Class A	2988
96971.9	39073.5	9.06303	µm	Spot	Position	1	S100B-	DAPI+	Class A	3018
97046.5	39113.5	8.51118	µm	Spot	Position	1	S100B-	DAPI+	Class A	3019
97097	39146.6	9.59799	µm	Spot	Position	1	S100B-	DAPI+	Class A	3048
97119.4	39186.3	8.56846	µm	Spot	Position	1	S100B-	DAPI+	Class A	3073
97106.1	39188.9	8.6605	µm	Spot	Position	1	S100B-	DAPI+	Class A	3074
97119.2	39199.9	8.43226	µm	Spot	Position	1	S100B-	DAPI+	Class A	3075
97114.4	39181.2	8.84222	µm	Spot	Position	1	S100B-	DAPI+	Class A	3076
97179.5	39220.6	9.5253	µm	Spot	Position	1	S100B-	DAPI+	Class A	3088
97217.7	39251.4	9.40145	µm	Spot	Position	1	S100B-	DAPI+	Class A	3089
97219.8	39253.4	9.53954	µm	Spot	Position	1	S100B-	DAPI+	Class A	3090
97227.2	39261.6	9.34128	µm	Spot	Position	1	S100B-	DAPI+	Class A	3111
97331	39310.3	8.60631	µm	Spot	Position	1	S100B-	DAPI+	Class A	3130
97322.1	39306.5	8.77326	µm	Spot	Position	1	S100B-	DAPI+	Class A	3132
97339.6	39322.7	8.8272	µm	Spot	Position	1	S100B-	DAPI+	Class A	3133
97338.2	39308.7	9.37811	µm	Spot	Position	1	S100B-	DAPI+	Class A	3134
97437	39354.5	8.65618	µm	Spot	Position	1	S100B-	DAPI+	Class A	3155
96952.4	38967.6	10.1597	µm	Spot	Position	1	S100B-	DAPI+	Class A	4958
96956.5	38977.5	10.0091	µm	Spot	Position	1	S100B-	DAPI+	Class A	4960
96935.9	39039	10.2339	µm	Spot	Position	1	S100B-	DAPI+	Class A	5133
96916.6	39033.1	10.5964	µm	Spot	Position	1	S100B-	DAPI+	Class A	5135
96949.5	39060.5	10.4125	µm	Spot	Position	1	S100B-	DAPI+	Class A	5140
96989.2	39046	10.7658	µm	Spot	Position	1	S100B-	DAPI+	Class A	5142
96970.3	39048.5	10.7023	µm	Spot	Position	1	S100B-	DAPI+	Class A	5143
96957.3	39057.6	10.8004	µm	Spot	Position	1	S100B-	DAPI+	Class A	5144
97004.6	39056	10.5804	µm	Spot	Position	1	S100B-	DAPI+	Class A	5156
97016.4	39114.9	10.1429	µm	Spot	Position	1	S100B-	DAPI+	Class A	5257
97029.6	39124.8	9.73357	µm	Spot	Position	1	S100B-	DAPI+	Class A	5348
97066.4	39135.9	9.75194	µm	Spot	Position	1	S100B-	DAPI+	Class A	5357
97066.2	39134.8	10.1694	µm	Spot	Position	1	S100B-	DAPI+	Class A	5358
97064.5	39137.3	9.95045	µm	Spot	Position	1	S100B-	DAPI+	Class A	5359
97085.3	39135.9	10.2554	µm	Spot	Position	1	S100B-	DAPI+	Class A	5369
97113.7	39179.6	9.83846	µm	Spot	Position	1	S100B-	DAPI+	Class A	5428
97097.9	39172.5	9.92591	µm	Spot	Position	1	S100B-	DAPI+	Class A	5430
97115.4	39178.6	10.1288	µm	Spot	Position	1	S100B-	DAPI+	Class A	5431
97118.1	39180.7	10.0358	µm	Spot	Position	1	S100B-	DAPI+	Class A	5433
97085.8	39168.3	10.3094	µm	Spot	Position	1	S100B-	DAPI+	Class A	5435
97116.3	39178	10.3822	µm	Spot	Position	1	S100B-	DAPI+	Class A	5436
97114.6	39193.9	10.6426	µm	Spot	Position	1	S100B-	DAPI+	Class A	5439
97147.1	39207.5	9.80251	µm	Spot	Position	1	S100B-	DAPI+	Class A	5440
97153.6	39191.5	10.108	µm	Spot	Position	1	S100B-	DAPI+	Class A	5441
97158.4	39191.5	9.99447	µm	Spot	Position	1	S100B-	DAPI+	Class A	5442
97137.9	39206.4	10.0272	µm	Spot	Position	1	S100B-	DAPI+	Class A	5443
97137.2	39206.7	10.1563	µm	Spot	Position	1	S100B-	DAPI+	Class A	5444
97167.9	39216.6	9.71041	µm	Spot	Position	1	S100B-	DAPI+	Class A	5525
97144.1	39211.7	10.1756	µm	Spot	Position	1	S100B-	DAPI+	Class A	5527
97165.9	39217.7	10.2894	µm	Spot	Position	1	S100B-	DAPI+	Class A	5529
97202.4	39226.1	10.5994	µm	Spot	Position	1	S100B-	DAPI+	Class A	5530
97219.8	39243.8	10.7697	µm	Spot	Position	1	S100B-	DAPI+	Class A	5531
97226.2	39260.6	10.6567	µm	Spot	Position	1	S100B-	DAPI+	Class A	5604
97300	39297.4	9.73297	µm	Spot	Position	1	S100B-	DAPI+	Class A	5605
97340.6	39324.5	10.1824	µm	Spot	Position	1	S100B-	DAPI+	Class A	5653
97367.8	39328.4	10.0992	µm	Spot	Position	1	S100B-	DAPI+	Class A	5659
97364.5	39316.3	10.234	µm	Spot	Position	1	S100B-	DAPI+	Class A	5660
97413.6	39308	10.7694	µm	Spot	Position	1	S100B-	DAPI+	Class A	5664
97469.2	39331	10.6875	µm	Spot	Position	1	S100B-	DAPI+	Class A	5670
97484.5	39346.2	10.5976	µm	Spot	Position	1	S100B-	DAPI+	Class A	5671
97481.7	39357.7	10.1231	µm	Spot	Position	1	S100B-	DAPI+	Class A	5696
97481.4	39353.8	10.3532	µm	Spot	Position	1	S100B-	DAPI+	Class A	5697
96959.4	38981.9	11.7267	µm	Spot	Position	1	S100B-	DAPI+	Class A	7578
96937.1	39044.5	11.0284	µm	Spot	Position	1	S100B-	DAPI+	Class A	7685
96951.5	39063.2	11.5386	µm	Spot	Position	1	S100B-	DAPI+	Class A	7700
96947.5	39042.7	11.9282	µm	Spot	Position	1	S100B-	DAPI+	Class A	7703
96947.1	39043.4	11.9129	µm	Spot	Position	1	S100B-	DAPI+	Class A	7704
97045.1	39108.7	10.9764	µm	Spot	Position	1	S100B-	DAPI+	Class A	7828
97088.6	39152.5	11.1581	µm	Spot	Position	1	S100B-	DAPI+	Class A	7975
97099.7	39170.2	10.8508	µm	Spot	Position	1	S100B-	DAPI+	Class A	8095
97117.8	39177	11.0761	µm	Spot	Position	1	S100B-	DAPI+	Class A	8096
97111.5	39182.6	11.274	µm	Spot	Position	1	S100B-	DAPI+	Class A	8097
97119.1	39177.2	11.6725	µm	Spot	Position	1	S100B-	DAPI+	Class A	8098
97091.5	39169.3	11.7331	µm	Spot	Position	1	S100B-	DAPI+	Class A	8101
97152.4	39207.8	11.6286	µm	Spot	Position	1	S100B-	DAPI+	Class A	8107
97158.9	39209.3	11.4697	µm	Spot	Position	1	S100B-	DAPI+	Class A	8108
97169.4	39214	11.1237	µm	Spot	Position	1	S100B-	DAPI+	Class A	8214
97150.1	39211.3	11.4739	µm	Spot	Position	1	S100B-	DAPI+	Class A	8216
97170.1	39218.1	11.5074	µm	Spot	Position	1	S100B-	DAPI+	Class A	8217
97171.7	39216.1	11.7765	µm	Spot	Position	1	S100B-	DAPI+	Class A	8218
97178.4	39220.9	10.9047	µm	Spot	Position	1	S100B-	DAPI+	Class A	8221
97250.5	39250.4	11.5461	µm	Spot	Position	1	S100B-	DAPI+	Class A	8225
97250.8	39251.8	11.5343	µm	Spot	Position	1	S100B-	DAPI+	Class A	8226
97239.7	39260.7	11.3267	µm	Spot	Position	1	S100B-	DAPI+	Class A	8344
97229.2	39261.8	11.5968	µm	Spot	Position	1	S100B-	DAPI+	Class A	8347
97255.4	39262	11.6274	µm	Spot	Position	1	S100B-	DAPI+	Class A	8348
97305.8	39292.5	11.2265	µm	Spot	Position	1	S100B-	DAPI+	Class A	8356
97273.5	39288.4	11.8889	µm	Spot	Position	1	S100B-	DAPI+	Class A	8361
97338.8	39304.6	11.0933	µm	Spot	Position	1	S100B-	DAPI+	Class A	8485
97351.2	39317.9	11.2374	µm	Spot	Position	1	S100B-	DAPI+	Class A	8486
97355.2	39313.1	11.6273	µm	Spot	Position	1	S100B-	DAPI+	Class A	8488
97322.7	39315.3	11.5763	µm	Spot	Position	1	S100B-	DAPI+	Class A	8489
97337.7	39323.1	11.6157	µm	Spot	Position	1	S100B-	DAPI+	Class A	8490
97331	39305.6	11.8636	µm	Spot	Position	1	S100B-	DAPI+	Class A	8492
97326.4	39313.7	11.8725	µm	Spot	Position	1	S100B-	DAPI+	Class A	8493
97366.2	39326.9	11.9168	µm	Spot	Position	1	S100B-	DAPI+	Class A	8500
97417.3	39339.3	11.0656	µm	Spot	Position	1	S100B-	DAPI+	Class A	8504
97443.3	39323.1	11.2802	µm	Spot	Position	1	S100B-	DAPI+	Class A	8505
97441.1	39323.8	11.2496	µm	Spot	Position	1	S100B-	DAPI+	Class A	8506
97443	39324.2	11.2044	µm	Spot	Position	1	S100B-	DAPI+	Class A	8507
97440.7	39320.2	11.4409	µm	Spot	Position	1	S100B-	DAPI+	Class A	8511
97510.7	39342.3	10.8278	µm	Spot	Position	1	S100B-	DAPI+	Class A	8524
97508.3	39339.9	11.9256	µm	Spot	Position	1	S100B-	DAPI+	Class A	8528
97485	39364.5	10.9748	µm	Spot	Position	1	S100B-	DAPI+	Class A	8611
97464.5	39354.3	11.35	µm	Spot	Position	1	S100B-	DAPI+	Class A	8612
97465.8	39354.4	11.4708	µm	Spot	Position	1	S100B-	DAPI+	Class A	8614
97469	39355.5	11.4786	µm	Spot	Position	1	S100B-	DAPI+	Class A	8615
97464.6	39352.9	11.8855	µm	Spot	Position	1	S100B-	DAPI+	Class A	8617
96950.8	38955.5	12.1078	µm	Spot	Position	1	S100B-	DAPI+	Class A	9698
96945.2	38957.5	12.0142	µm	Spot	Position	1	S100B-	DAPI+	Class A	9699
96923.5	39015.4	12.5478	µm	Spot	Position	1	S100B-	DAPI+	Class A	9780
96945.9	39013.1	12.3245	µm	Spot	Position	1	S100B-	DAPI+	Class A	9796
96960.9	38985.4	12.9586	µm	Spot	Position	1	S100B-	DAPI+	Class A	9798
96942.2	39047.8	12.5123	µm	Spot	Position	1	S100B-	DAPI+	Class A	9902
96972.2	39041.8	12.8121	µm	Spot	Position	1	S100B-	DAPI+	Class A	9911
96997	39043.8	12.1375	µm	Spot	Position	1	S100B-	DAPI+	Class A	9915
97033.3	39121.8	12.7283	µm	Spot	Position	1	S100B-	DAPI+	Class A	10137
97067.6	39133.1	12.0573	µm	Spot	Position	1	S100B-	DAPI+	Class A	10140
97069.5	39134.1	12.2889	µm	Spot	Position	1	S100B-	DAPI+	Class A	10141
97088.9	39162.5	12.1926	µm	Spot	Position	1	S100B-	DAPI+	Class A	10146
97088.5	39151.3	12.9816	µm	Spot	Position	1	S100B-	DAPI+	Class A	10153
97101.8	39166	12.4014	µm	Spot	Position	1	S100B-	DAPI+	Class A	10259
97114.5	39184.1	12.6356	µm	Spot	Position	1	S100B-	DAPI+	Class A	10261
97261.2	39261.2	12.2581	µm	Spot	Position	1	S100B-	DAPI+	Class A	10464
97243.2	39264.4	12.077	µm	Spot	Position	1	S100B-	DAPI+	Class A	10465
97230	39257.3	12.4136	µm	Spot	Position	1	S100B-	DAPI+	Class A	10466
97260.2	39258.9	12.7738	µm	Spot	Position	1	S100B-	DAPI+	Class A	10469
97245.2	39263.6	12.8702	µm	Spot	Position	1	S100B-	DAPI+	Class A	10471
97245.5	39257	13.0494	µm	Spot	Position	1	S100B-	DAPI+	Class A	10473
97276.7	39289.3	12.0542	µm	Spot	Position	1	S100B-	DAPI+	Class A	10481
97272.7	39285.3	13.0969	µm	Spot	Position	1	S100B-	DAPI+	Class A	10490
97348.2	39318.3	12.3804	µm	Spot	Position	1	S100B-	DAPI+	Class A	10606
97409.5	39311.1	12.5692	µm	Spot	Position	1	S100B-	DAPI+	Class A	10611
97451.7	39321	13.0395	µm	Spot	Position	1	S100B-	DAPI+	Class A	10621
97521.2	39346.5	12.2809	µm	Spot	Position	1	S100B-	DAPI+	Class A	10627
97507.9	39337.1	12.7087	µm	Spot	Position	1	S100B-	DAPI+	Class A	10629
97437.6	39352.5	12.569	µm	Spot	Position	1	S100B-	DAPI+	Class A	10711
97487	39352.3	12.0667	µm	Spot	Position	1	S100B-	DAPI+	Class A	10714
97480.2	39366.3	12.7103	µm	Spot	Position	1	S100B-	DAPI+	Class A	10715
96924.9	39013.7	13.774	µm	Spot	Position	1	S100B-	DAPI+	Class A	10987
96965.4	38999.4	13.4655	µm	Spot	Position	1	S100B-	DAPI+	Class A	10990
96960.3	39003.7	13.2502	µm	Spot	Position	1	S100B-	DAPI+	Class A	10991
96945.3	39020.7	13.2968	µm	Spot	Position	1	S100B-	DAPI+	Class A	10992
96963	38994.9	13.634	µm	Spot	Position	1	S100B-	DAPI+	Class A	10994
96949.6	39059.9	13.4561	µm	Spot	Position	1	S100B-	DAPI+	Class A	11044
96974.4	39046.9	13.7756	µm	Spot	Position	1	S100B-	DAPI+	Class A	11047
96993.2	39048.5	13.2585	µm	Spot	Position	1	S100B-	DAPI+	Class A	11050
97027.5	39082.3	13.3568	µm	Spot	Position	1	S100B-	DAPI+	Class A	11110
97025.1	39090.9	13.2557	µm	Spot	Position	1	S100B-	DAPI+	Class A	11111
96998.2	39085.7	13.9227	µm	Spot	Position	1	S100B-	DAPI+	Class A	11114
97026.7	39090.2	13.9872	µm	Spot	Position	1	S100B-	DAPI+	Class A	11115
97033	39095.2	14.2783	µm	Spot	Position	1	S100B-	DAPI+	Class A	11118
97031.9	39120.4	13.282	µm	Spot	Position	1	S100B-	DAPI+	Class A	11195
97092.4	39163.3	14.2661	µm	Spot	Position	1	S100B-	DAPI+	Class A	11212
97124.2	39177.6	13.3576	µm	Spot	Position	1	S100B-	DAPI+	Class A	11290
97102.3	39178.3	13.478	µm	Spot	Position	1	S100B-	DAPI+	Class A	11291
97095.5	39166.8	13.6439	µm	Spot	Position	1	S100B-	DAPI+	Class A	11292
97085.3	39163.5	14.0296	µm	Spot	Position	1	S100B-	DAPI+	Class A	11294
97090.3	39169.8	14.0714	µm	Spot	Position	1	S100B-	DAPI+	Class A	11295
97200.9	39223.7	13.2471	µm	Spot	Position	1	S100B-	DAPI+	Class A	11407
97270.8	39284.9	13.859	µm	Spot	Position	1	S100B-	DAPI+	Class A	11517
97325.8	39298.9	13.5332	µm	Spot	Position	1	S100B-	DAPI+	Class A	11528
97321.7	39302.5	13.7498	µm	Spot	Position	1	S100B-	DAPI+	Class A	11626
97339.8	39315.7	14.2253	µm	Spot	Position	1	S100B-	DAPI+	Class A	11628
97371.1	39328	13.7853	µm	Spot	Position	1	S100B-	DAPI+	Class A	11630
97422.8	39331.5	13.8207	µm	Spot	Position	1	S100B-	DAPI+	Class A	11645
97468.8	39354.3	13.6395	µm	Spot	Position	1	S100B-	DAPI+	Class A	11731
97479.8	39364.6	13.5952	µm	Spot	Position	1	S100B-	DAPI+	Class A	11732
97504.5	39354.7	14.3833	µm	Spot	Position	1	S100B-	DAPI+	Class A	11736
97168.7	39214.6	14.651	µm	Spot	Position	1	S100B-	DAPI+	Class A	11840
96930.6	38047.6	0.1501	µm	Spot	Position	1	S100B+;S100B-	DAPI+;DAPI-	Class A	0

## Sheet: Sample 1 Rlbp1+DCX V-SVZ Distan
AC335 Rlbp1 555S Dcx 488_R_[ii17_TileScan_1_Merged_Image_18]_VSVZDistance_Position
Position
====================
Position X	Position Y	Position Z	Unit	Category	Collection	Name	Time	ID
54301.7	43805.3	0.150101	µm	MeasurementPoint	Position	A	1	0
54320	43828.3	0.150101	µm	MeasurementPoint	Position	B	1	1
54363.9	43833.5	0.150101	µm	MeasurementPoint	Position	C	1	2
54417.7	43830.8	0.150101	µm	MeasurementPoint	Position	D	1	3
54465.7	43808	0.150101	µm	MeasurementPoint	Position	E	1	4
54521.4	43770.5	0.150101	µm	MeasurementPoint	Position	F	1	5
54564.3	43747.2	0.150101	µm	MeasurementPoint	Position	G	1	6
54610.9	43706.6	0.150108	µm	MeasurementPoint	Position	H	1	7
54655.4	43669.7	0.150101	µm	MeasurementPoint	Position	I	1	8
54704.1	43636.3	0.150101	µm	MeasurementPoint	Position	J	1	9
54784.8	43578.4	0.150101	µm	MeasurementPoint	Position	K	1	10
54846.9	43536.9	0.150101	µm	MeasurementPoint	Position	L	1	11
54880.1	43518.2	0.150101	µm	MeasurementPoint	Position	M	1	12
54960.1	43485.1	0.150101	µm	MeasurementPoint	Position	N	1	13
55006.7	43447.2	0.150101	µm	MeasurementPoint	Position	O	1	14
55058	43412.7	0.150101	µm	MeasurementPoint	Position	P	1	15
55092.1	43394.7	0.150101	µm	MeasurementPoint	Position	Q	1	16
55129.3	43398.1	0.150101	µm	MeasurementPoint	Position	R	1	17
55196.1	43424.9	0.150097	µm	MeasurementPoint	Position	S	1	18
55246.2	43453.9	0.150101	µm	MeasurementPoint	Position	T	1	19
55266.8	43468.8	0.150101	µm	MeasurementPoint	Position	U	1	20
55289	43522.8	0.150101	µm	MeasurementPoint	Position	V	1	21
55313.3	43572.8	0.150101	µm	MeasurementPoint	Position	W	1	22
55335.7	43625.2	0.150101	µm	MeasurementPoint	Position	X	1	23
55351.5	43679.7	0.150101	µm	MeasurementPoint	Position	Y	1	24
55362.8	43725.9	0.150101	µm	MeasurementPoint	Position	Z	1	25

## Sheet: Sample 2 Rlbp1+DCX V-SVZ Distan
AC338 Rlbp1 555S Dcx 488_R_[ii20_TileScan_1_Merged_Image_21]_VSVZDistance_Position
Position
====================
Position X	Position Y	Position Z	Unit	Category	Collection	Name	Time	ID
45770.4	42870.6	4.3529	µm	MeasurementPoint	Position	A	1	0
45582.6	44003.9	5.5537	µm	MeasurementPoint	Position	A	1	26
45778.9	42884.1	4.6531	µm	MeasurementPoint	Position	B	1	1
45581.6	44035.9	3.1521	µm	MeasurementPoint	Position	B	1	27
45779.7	42905.6	6.1541	µm	MeasurementPoint	Position	C	1	2
45574.9	44062.3	3.4523	µm	MeasurementPoint	Position	C	1	28
45779.2	42934.4	6.7545	µm	MeasurementPoint	Position	D	1	3
45566.8	44116	2.5517	µm	MeasurementPoint	Position	D	1	29
45777.1	42959.5	5.8539	µm	MeasurementPoint	Position	E	1	4
45558.3	44177.6	5.2535	µm	MeasurementPoint	Position	E	1	30
45756.4	43018.2	3.1521	µm	MeasurementPoint	Position	F	1	5
45558.9	44198	4.3529	µm	MeasurementPoint	Position	F	1	31
45746.1	43068.6	3.7525	µm	MeasurementPoint	Position	G	1	6
45579.1	44230.9	3.1521	µm	MeasurementPoint	Position	G	1	32
45739.6	43103.3	10.0567	µm	MeasurementPoint	Position	H	1	7
45605.7	44266	4.0527	µm	MeasurementPoint	Position	H	1	33
45738.5	43128.4	3.7525	µm	MeasurementPoint	Position	I	1	8
45629.3	44299.1	4.6531	µm	MeasurementPoint	Position	I	1	34
45738	43162.3	4.3529	µm	MeasurementPoint	Position	J	1	9
45643.9	44314.5	5.2535	µm	MeasurementPoint	Position	J	1	35
45734.2	43206.5	0.1501	µm	MeasurementPoint	Position	K	1	10
45667.5	44336.1	3.7525	µm	MeasurementPoint	Position	K	1	36
45731.2	43232.6	4.9533	µm	MeasurementPoint	Position	L	1	11
45688.9	44353.9	4.6531	µm	MeasurementPoint	Position	L	1	37
45720.8	43288.8	4.6531	µm	MeasurementPoint	Position	M	1	12
45706.8	44367.2	3.7525	µm	MeasurementPoint	Position	M	1	38
45712.5	43345.8	4.0527	µm	MeasurementPoint	Position	N	1	13
45730.6	44380.5	8.8559	µm	MeasurementPoint	Position	N	1	39
45706.1	43382.5	4.3529	µm	MeasurementPoint	Position	O	1	14
45767.9	44401.4	5.5537	µm	MeasurementPoint	Position	O	1	40
45697.7	43429.9	2.5517	µm	MeasurementPoint	Position	P	1	15
45795.5	44419.1	6.4543	µm	MeasurementPoint	Position	P	1	41
45688.7	43476.5	4.0527	µm	MeasurementPoint	Position	Q	1	16
45813.3	44431.4	4.9533	µm	MeasurementPoint	Position	Q	1	42
45675.1	43527.6	4.0527	µm	MeasurementPoint	Position	R	1	17
45843.1	44448	2.5517	µm	MeasurementPoint	Position	R	1	43
45661	43583.4	2.8519	µm	MeasurementPoint	Position	S	1	18
45864	44453.2	6.7545	µm	MeasurementPoint	Position	S	1	44
45651	43635.8	3.7525	µm	MeasurementPoint	Position	T	1	19
45886.7	44462	3.1521	µm	MeasurementPoint	Position	T	1	45
45635.1	43696.6	3.7525	µm	MeasurementPoint	Position	U	1	20
45906.6	44467.2	3.7525	µm	MeasurementPoint	Position	U	1	46
45626.6	43746.3	3.7525	µm	MeasurementPoint	Position	V	1	21
45938.8	44469.7	5.8539	µm	MeasurementPoint	Position	V	1	47
45615.4	43796.3	3.7525	µm	MeasurementPoint	Position	W	1	22
45961.4	44472.4	2.5517	µm	MeasurementPoint	Position	W	1	48
45606.9	43851.1	6.1541	µm	MeasurementPoint	Position	X	1	23
45984.4	44468.1	4.3529	µm	MeasurementPoint	Position	X	1	49
45596	43902.6	1.9513	µm	MeasurementPoint	Position	Y	1	24
46008.1	44459.8	2.8519	µm	MeasurementPoint	Position	Y	1	50
45583	43974.8	4.9533	µm	MeasurementPoint	Position	Z	1	25

## Sheet: Sample 3 Rlbp1+DCX V-SVZ Distan
AC350 Rlbp1 555 DCX 488_R_[ii24_TileScan_1_Merged_Image_25]_VSVZDistance_Position
Position
====================
Position X	Position Y	Position Z	Unit	Category	Collection	Name	Time	ID
97910.4	38211.7	13.3589	µm	MeasurementPoint	Position	A	1	0
98373	39555.6	7.6551	µm	MeasurementPoint	Position	A	1	26
97928.7	38265.6	13.6591	µm	MeasurementPoint	Position	B	1	1
98423.5	39566.1	14.5597	µm	MeasurementPoint	Position	B	1	27
97938.6	38351.9	12.1581	µm	MeasurementPoint	Position	C	1	2
98462.8	39573.3	9.4563	µm	MeasurementPoint	Position	C	1	28
97947.1	38434.8	13.6591	µm	MeasurementPoint	Position	D	1	3
98519.8	39583.5	12.7585	µm	MeasurementPoint	Position	D	1	29
97951.8	38519.3	13.9593	µm	MeasurementPoint	Position	E	1	4
98546.4	39585.7	12.1581	µm	MeasurementPoint	Position	E	1	30
97957.4	38586.3	10.3569	µm	MeasurementPoint	Position	F	1	5
98650	39613.8	14.7395	µm	MeasurementPoint	Position	F	1	31
97951.7	38656.2	13.0587	µm	MeasurementPoint	Position	G	1	6
98706	39615.1	13.9593	µm	MeasurementPoint	Position	G	1	32
97947.8	38724.2	14.8599	µm	MeasurementPoint	Position	H	1	7
98755.1	39613.1	13.6591	µm	MeasurementPoint	Position	H	1	33
97944.2	38820.2	13.6591	µm	MeasurementPoint	Position	I	1	8
97943.6	38871.8	12.7585	µm	MeasurementPoint	Position	J	1	9
97941.4	38938.7	11.2575	µm	MeasurementPoint	Position	K	1	10
97939.8	38989.8	14.2595	µm	MeasurementPoint	Position	L	1	11
97934	39047.7	13.6591	µm	MeasurementPoint	Position	M	1	12
97932	39093.9	13.6591	µm	MeasurementPoint	Position	N	1	13
97932.9	39145.3	14.2595	µm	MeasurementPoint	Position	O	1	14
97938.4	39184.7	13.3589	µm	MeasurementPoint	Position	P	1	15
97956.9	39233.2	6.1541	µm	MeasurementPoint	Position	Q	1	16
97960.6	39269	12.1581	µm	MeasurementPoint	Position	R	1	17
98001.9	39309.5	9.1561	µm	MeasurementPoint	Position	S	1	18
98049.7	39352.9	13.3589	µm	MeasurementPoint	Position	T	1	19
98103.9	39398.9	9.1561	µm	MeasurementPoint	Position	U	1	20
98158	39436.2	13.6591	µm	MeasurementPoint	Position	V	1	21
98200.5	39461.4	13.6591	µm	MeasurementPoint	Position	W	1	22
98254.1	39498.4	16.0607	µm	MeasurementPoint	Position	X	1	23
98298.5	39526	15.1601	µm	MeasurementPoint	Position	Y	1	24
98329.8	39543.7	10.3569	µm	MeasurementPoint	Position	Z	1	25

[truncated: 3 more sheets: Sample 1 Slit2+DCX V-SVZ Distan, Sample 2 Slit2+DCX V-SVZ Distan, Sample 3 Slit2+DCX V-SVZ Distan]
