# Supplementary material for: Single-cell analysis of the ventricular-subventricular zone reveals signatures of dorsal and ventral adult neurogenesis
Source: eLife. 2021 Jul 14;10:e67436. doi: 10.7554/eLife.67436 (PMC8443251; doi:10.7554/eLife.67436)
Supplement: Supplementary file 2. [file elife-67436-supp2.xlsx]

## Sheet: Sheet1
Cluster	Phase	n	Percent
0	G1	1639	94.25
0	G2M	4	0.23
0	S	96	5.52
1	G1	1641	97.33
1	G2M	7	0.42
1	S	38	2.25
2	G1	1629	99.57
2	G2M	4	0.24
2	S	3	0.18
3	G1	1630	99.88
3	G2M	2	0.12
4	G1	1378	89.48
4	G2M	4	0.26
4	S	158	10.26
5	G1	1348	99.41
5	S	8	0.59
6	G1	730	60.48
6	G2M	37	3.07
6	S	440	36.45
7	G1	1101	99.01
7	G2M	5	0.45
7	S	6	0.54
8	G2M	828	78.04
8	S	233	21.96
9	G1	990	94.11
9	G2M	12	1.14
9	S	50	4.75
10	G2M	500	47.94
10	S	543	52.06
11	G1	980	98.1
11	G2M	11	1.1
11	S	8	0.8
12	G1	206	20.77
12	G2M	95	9.58
12	S	691	69.66
13	G1	722	75.52
13	G2M	34	3.56
13	S	200	20.92
14	G1	763	99.74
14	G2M	2	0.26
15	G1	71	9.44
15	G2M	203	26.99
15	S	478	63.56
16	G2M	347	48.8
16	S	364	51.2
17	G2M	560	100
18	G1	418	97.21
18	G2M	5	1.16
18	S	7	1.63
19	G1	366	99.73
19	G2M	1	0.27
20	G1	345	100
21	G1	321	99.69
21	G2M	1	0.31
22	G1	278	95.21
22	G2M	5	1.71
22	S	9	3.08
23	G1	241	99.59
23	G2M	1	0.41
24	G1	204	100
25	G1	198	99.5
25	S	1	0.5
26	G1	173	98.3
26	G2M	2	1.14
26	S	1	0.57
27	G1	156	96.89
27	G2M	1	0.62
27	S	4	2.48
28	G1	138	97.87
28	G2M	1	0.71
28	S	2	1.42
29	G1	138	100
30	G1	129	98.47
30	G2M	1	0.76
30	S	1	0.76
31	G1	91	97.85
31	S	2	2.15
32	G1	50	76.92
32	G2M	5	7.69
32	S	10	15.38
33	G1	51	94.44
33	G2M	3	5.56
34	G1	43	100
35	G2M	32	91.43
35	S	3	8.57
36	G1	24	100
