# Supplementary material for: Single-cell analysis of the ventricular-subventricular zone reveals signatures of dorsal and ventral adult neurogenesis
Source: eLife. 2021 Jul 14;10:e67436. doi: 10.7554/eLife.67436 (PMC8443251; doi:10.7554/eLife.67436)
Supplement: Supplementary file 3. [file elife-67436-supp3.xlsx]

## Sheet: Contents
	Related to Figure	Sheet Contents	Software Used	Cluster 1	Cluster 2	Cluster 3	Cutoffs
Sheet 1	Figure 3	FindMarkers Output Table	Seurat 3	14	5+22	na	p_val_adj < 0.05
Sheet 2	Figure 3-Supplement 1	FindAllMarkers Output Table	Seurat 3	14	5	22	p_val_adj < 0.05
Sheet 3	na	Dorsal B Cells - GO terms of DE genes Panther Output Table, all terms	Panther 16.0	5+22	na	na	p_val_adj < 0.05, avg_log
Sheet 4	na	Ventral B Cells - GO terms of DE genes Panther Output Table, all terms	Panther 16.0	14	na	na	p_val_adj < 0.05, avg_log

## Sheet: Sheet1
p_val	avg_logFC	pct.1	pct.2	p_val_adj	gene	cluster
0	2.03923	0.894	0.103	0	Crym	14
8.19797e-158	0.85876	0.646	0.136	2.11532e-153	Dpyd	14
1.16155e-151	0.83574	0.71	0.189	2.99715e-147	Adgrl3	14
1.28861e-147	0.962419	0.779	0.26	3.32501e-143	Ncam2	14
4.91074e-139	0.654125	0.995	0.956	1.26712e-134	Itm2c	14
3.92366e-122	0.805547	0.945	0.679	1.01242e-117	Frmd4a	14
3.8905e-113	1.00151	0.91	0.533	1.00387e-108	Cebpd	14
1.22034e-106	0.726026	0.711	0.266	3.14884e-102	Grm3	14
8.8274e-103	0.684076	0.749	0.328	2.27773e-98	Riiad1	14
7.25945e-102	0.531333	0.495	0.109	1.87315e-97	C1ql3	14
1.51132e-98	0.582197	0.523	0.133	3.89965e-94	Notum	14
3.76959e-95	0.972453	0.827	0.444	9.72666e-91	Klf2	14
9.43274e-95	0.632397	0.995	0.944	2.43393e-90	S100a6	14
2.21561e-90	0.351395	1	1	5.71694e-86	Gpm6b	14
3.12517e-86	0.483652	0.553	0.17	8.06388e-82	Spon1	14
5.84686e-83	0.369653	0.332	0.044	1.50867e-78	Lmo1	14
1.64686e-82	0.520098	0.386	0.071	4.24938e-78	Nkx6-2	14
1.19078e-81	0.557788	0.89	0.538	3.07256e-77	Lxn	14
9.45769e-79	0.623872	0.982	0.891	2.44037e-74	Fabp7	14
2.1549e-75	0.490838	0.613	0.246	5.5603e-71	Pter	14
3.23372e-75	0.546825	0.684	0.362	8.34396e-71	Basp1	14
1.60159e-73	0.566745	0.878	0.614	4.13258e-69	Ptprt	14
1.40917e-72	0.62904	0.703	0.35	3.63609e-68	S100a4	14
2.95134e-70	0.72512	0.461	0.141	7.61535e-66	Slit2	14
4.37054e-68	0.463974	0.993	0.966	1.12773e-63	Pbx1	14
2.84392e-66	0.678156	0.507	0.198	7.33816e-62	Adamts18	14
8.63486e-66	0.560384	0.901	0.681	2.22805e-61	Ntm	14
1.49694e-65	0.41532	0.999	0.994	3.86256e-61	Slc1a3	14
2.63984e-64	0.4377	0.898	0.667	6.81159e-60	Hmgcs2	14
2.47967e-63	0.43202	0.991	0.933	6.39829e-59	Tmem47	14
5.05326e-55	0.43176	0.546	0.247	1.30389e-50	Tmem176b	14
1.97567e-54	0.45808	0.463	0.167	5.09781e-50	Ptprn2	14
1.61383e-51	0.587712	0.703	0.432	4.16416e-47	Egr2	14
1.89767e-50	0.309269	0.342	0.097	4.89655e-46	Rbms1	14
2.22042e-50	0.671685	0.48	0.195	5.72934e-46	Fas	14
1.41746e-49	0.253111	1	0.999	3.65747e-45	Itm2b	14
6.31935e-49	0.307226	0.391	0.131	1.63058e-44	Cpne8	14
9.50818e-49	0.460085	0.763	0.486	2.4534e-44	Ramp1	14
1.68121e-48	0.348205	0.336	0.096	4.33803e-44	Fam183b	14
4.32655e-48	0.579221	0.672	0.399	1.11638e-43	Slc38a1	14
1.10409e-47	0.451611	0.884	0.7	2.84889e-43	Serpine2	14
2.70657e-47	0.440595	0.471	0.192	6.98377e-43	Sgcd	14
5.35159e-47	0.424674	0.761	0.501	1.38087e-42	Selenop	14
8.12775e-46	0.475337	0.8	0.572	2.0972e-41	Prex2	14
9.28447e-45	0.46212	0.506	0.238	2.39567e-40	Foxj1	14
2.7929e-44	0.38747	0.765	0.51	7.20652e-40	Lhfp	14
5.07303e-44	0.402759	0.844	0.64	1.30899e-39	Phyhipl	14
5.31831e-44	0.315528	0.416	0.162	1.37228e-39	Ccdc170	14
9.16973e-44	0.352704	0.6	0.32	2.36607e-39	Ifi27	14
4.18423e-43	0.824684	0.37	0.134	1.07966e-38	Prss56	14
5.50686e-43	0.518576	0.447	0.198	1.42094e-38	Col5a2	14
6.80412e-42	0.329392	0.593	0.326	1.75567e-37	Fmo1	14
1.42306e-41	0.392711	0.549	0.278	3.67193e-37	C4b	14
3.03419e-41	0.39441	0.618	0.356	7.82912e-37	Cnp	14
5.18558e-41	0.53577	0.796	0.59	1.33803e-36	Slc4a4	14
2.74871e-40	0.315908	0.315	0.1	7.09249e-36	Capsl	14
4.40533e-40	0.413052	0.723	0.473	1.13671e-35	Mlf1	14
2.50745e-39	0.254932	0.261	0.071	6.46997e-35	Tmem176a	14
2.63323e-39	0.362397	0.758	0.489	6.79452e-35	Grik2	14
5.11133e-39	0.269663	0.995	0.997	1.31888e-34	Cspg5	14
5.64693e-39	0.420614	0.868	0.68	1.45708e-34	Klf6	14
2.12546e-38	0.312706	0.766	0.55	5.48434e-34	Ncam1	14
7.34825e-38	0.257502	0.319	0.109	1.89607e-33	Itih5	14
8.49006e-38	0.338218	0.268	0.076	2.19069e-33	Car8	14
1.12071e-37	0.39605	0.975	0.936	2.89176e-33	Hsp90aa1	14
1.13881e-37	0.355985	0.6	0.363	2.93847e-33	Crot	14
1.46721e-37	0.378354	0.454	0.209	3.78583e-33	Cacnb2	14
2.60231e-37	0.279753	0.386	0.154	6.71473e-33	Apbb2	14
5.4029e-37	0.280844	0.986	0.95	1.39411e-32	Tspan7	14
1.11606e-36	0.331843	0.63	0.379	2.87977e-32	Adcyap1r1	14
3.74808e-36	0.521233	0.642	0.399	9.67118e-32	Ifitm3	14
5.13834e-36	0.337111	0.282	0.09	1.32585e-31	Serpinb1a	14
5.51787e-36	0.352796	0.69	0.444	1.42378e-31	Tppp3	14
1.37078e-35	0.462675	0.745	0.551	3.53704e-31	Sorbs1	14
2.87511e-35	0.39263	0.867	0.681	7.41865e-31	Hdac9	14
3.11692e-35	0.324679	0.952	0.863	8.04258e-31	Pantr1	14
3.51651e-35	0.270365	0.652	0.382	9.07366e-31	Six3	14
3.10033e-34	0.397082	0.476	0.235	7.99979e-30	Aqp4	14
5.23122e-34	0.432458	0.387	0.164	1.34981e-29	Arc	14
1.12763e-33	0.289122	0.949	0.846	2.90962e-29	Scg3	14
1.55717e-33	0.379733	0.821	0.682	4.01796e-29	Sfrp1	14
3.42063e-33	0.289795	0.352	0.14	8.82626e-29	Efna5	14
4.44936e-33	0.361977	0.55	0.311	1.14807e-28	Ptpn12	14
6.91537e-33	0.32845	0.859	0.706	1.78437e-28	Mgst1	14
1.01225e-32	0.325159	0.722	0.499	2.61192e-28	Gng12	14
2.04986e-32	0.298853	0.327	0.128	5.28924e-28	Sntb1	14
2.22581e-32	0.284704	0.956	0.891	5.74325e-28	Acot1	14
2.3962e-32	0.299181	0.593	0.34	6.18291e-28	Pltp	14
3.94159e-32	0.30041	0.554	0.305	1.01705e-27	Irf1	14
9.03074e-32	0.341904	0.575	0.35	2.3302e-27	Il6st	14
9.92812e-32	0.351032	0.876	0.725	2.56175e-27	Timp3	14
1.00249e-31	0.491629	0.503	0.283	2.58673e-27	Nfatc2	14
3.98444e-31	0.332716	0.335	0.138	1.0281e-26	Pros1	14
3.74928e-30	0.432898	0.707	0.488	9.67426e-26	9330159F19Rik	14
2.70191e-29	0.27313	0.414	0.208	6.97173e-25	Lgr4	14
4.07891e-29	0.286954	0.888	0.715	1.05248e-24	Selenom	14
5.13148e-29	0.250433	0.461	0.243	1.32408e-24	Plekhm3	14
2.63853e-28	0.274952	0.962	0.877	6.80819e-24	S100a16	14
5.12344e-28	0.267921	0.392	0.189	1.322e-23	Cables1	14
7.27408e-28	0.307281	0.898	0.733	1.87693e-23	Gpr37l1	14
9.02806e-28	0.391191	0.579	0.359	2.32951e-23	Socs3	14
5.46842e-27	0.317126	0.638	0.427	1.41102e-22	Sema6a	14
1.22304e-26	0.257972	0.625	0.416	3.1558e-22	Tspan15	14
1.63322e-26	0.345953	0.641	0.424	4.21419e-22	Usp53	14
1.23928e-25	0.295119	0.671	0.473	3.19773e-21	Bcl2	14
1.60192e-25	0.2599	0.417	0.228	4.13344e-21	Gpld1	14
3.43217e-25	0.278974	0.987	0.951	8.85602e-21	Sox9	14
4.57655e-25	0.3035	0.684	0.493	1.18089e-20	Foxo1	14
5.16361e-25	0.280746	0.429	0.239	1.33237e-20	Jak2	14
2.8991e-24	0.322732	0.668	0.471	7.48055e-20	Enkur	14
6.17756e-24	0.273885	0.358	0.178	1.594e-19	Prickle2	14
6.27623e-24	0.254879	0.463	0.261	1.61946e-19	Foxp1	14
8.35607e-24	0.369426	0.861	0.746	2.15612e-19	Stat3	14
8.42715e-24	0.336158	0.613	0.403	2.17446e-19	Txnip	14
1.52182e-23	0.262276	0.771	0.584	3.92676e-19	Abca1	14
1.89171e-23	0.395826	0.55	0.371	4.88117e-19	Arl13b	14
3.02809e-23	0.316656	0.933	0.837	7.81338e-19	B3galt1	14
4.86864e-23	0.311404	0.642	0.428	1.25626e-18	Tsc22d2	14
4.98852e-23	0.262865	0.631	0.431	1.28719e-18	Oxr1	14
1.84744e-22	0.255073	0.495	0.301	4.76695e-18	Mertk	14
2.52952e-22	0.275347	0.254	0.107	6.52692e-18	Necab2	14
2.7598e-22	0.25735	0.452	0.266	7.1211e-18	Ccdc114	14
1.64498e-21	0.31473	0.914	0.751	4.24454e-17	Meg3	14
1.76512e-21	0.271782	0.869	0.756	4.55455e-17	Myo6	14
3.52691e-21	0.250822	0.486	0.299	9.10049e-17	Mns1	14
1.29697e-20	0.300898	0.841	0.7	3.34658e-16	Hdac8	14
2.14106e-20	0.392969	0.719	0.548	5.52456e-16	Gm10561	14
3.72303e-20	0.313517	0.507	0.329	9.60654e-16	Gabrg3	14
5.75313e-20	0.269977	0.705	0.519	1.48448e-15	Ldha	14
8.01212e-20	0.286599	0.467	0.286	2.06737e-15	Slc6a6	14
8.43398e-20	0.341088	0.633	0.456	2.17622e-15	Slc7a11	14
1.18882e-19	0.319683	0.336	0.18	3.06752e-15	Serpina3n	14
5.37931e-19	0.25001	0.536	0.367	1.38802e-14	Itih3	14
1.37179e-18	0.26745	0.267	0.123	3.53962e-14	Emp1	14
2.02946e-18	0.257059	0.837	0.702	5.23661e-14	Arap2	14
4.95718e-18	0.251712	0.86	0.743	1.2791e-13	Hist1h2bc	14
5.64834e-18	0.439496	0.647	0.5	1.45744e-13	Atf3	14
1.24512e-17	0.362556	0.846	0.721	3.21277e-13	Dnajb1	14
2.71348e-17	0.30568	0.724	0.574	7.00158e-13	Zfp608	14
9.5899e-17	0.253567	0.331	0.184	2.47448e-12	Spag16	14
2.52562e-16	0.259467	0.651	0.507	6.51686e-12	Nrcam	14
4.05994e-16	0.289983	0.599	0.441	1.04759e-11	Myo1e	14
7.53536e-16	0.364769	0.796	0.698	1.94435e-11	Pde4b	14
1.77314e-15	0.268098	0.578	0.438	4.57524e-11	Arhgef4	14
3.18272e-15	0.265125	0.643	0.482	8.21238e-11	Gclc	14
6.8693e-15	0.281303	0.523	0.36	1.77249e-10	Ankrd28	14
1.22767e-14	0.297259	0.588	0.451	3.16776e-10	Etv6	14
2.66732e-14	0.368503	0.787	0.668	6.88249e-10	Bmpr1b	14
4.09426e-14	0.253786	0.444	0.3	1.05644e-09	Dcun1d3	14
2.33416e-13	0.405516	0.675	0.549	6.02284e-09	Dst	14
3.91523e-13	0.280998	0.81	0.707	1.01025e-08	Zfp36	14
1.50205e-11	0.273296	0.797	0.712	3.87573e-07	Vcl	14
2.08949e-11	0.300608	0.702	0.605	5.39152e-07	Tanc2	14
9.71701e-09	0.272365	0.11	0.047	0.000250728	Cxcl1	14
1.97805e-08	0.453474	0.735	0.709	0.000510397	Nnat	14
3.86216e-08	0.269132	0.847	0.77	0.000996554	Gadd45g	14
1.53283e-189	-1.2137	0.388	0.912	3.95516e-185	Pla2g7	5+22
2.42236e-187	-0.674504	0.996	1	6.25042e-183	Ntrk2	5+22
2.47061e-147	-1.21756	0.66	0.956	6.37492e-143	Nrg1	5+22
1.13817e-98	-1.27	0.169	0.601	2.93683e-94	Urah	5+22
6.80953e-93	-1.44939	0.62	0.833	1.75706e-88	Cdk11b	5+22
2.07888e-89	-0.683986	0.929	0.988	5.36414e-85	Slc15a2	5+22
2.10486e-87	-1.07139	0.533	0.78	5.43118e-83	Vps37b	5+22
1.50335e-82	-0.682048	0.341	0.711	3.8791e-78	Epha5	5+22
5.22113e-78	-0.635304	0.914	0.979	1.34721e-73	Dclk1	5+22
2.60585e-77	-0.542442	0.08	0.462	6.72388e-73	Rlbp1	5+22
7.10288e-68	-0.718747	0.054	0.392	1.83276e-63	Gm29260	5+22
5.22502e-67	-0.660494	0.15	0.512	1.34821e-62	Dio2	5+22
1.05398e-66	-0.586051	0.98	0.997	2.71959e-62	Slc25a3	5+22
3.4572e-62	-0.841083	0.848	0.925	8.92062e-58	Arih1	5+22
1.5609e-60	-0.835288	0.493	0.752	4.0276e-56	Gpc5	5+22
7.05792e-60	-0.415725	0.995	0.995	1.82116e-55	Clu	5+22
2.75987e-58	-0.487602	0.993	0.982	7.12128e-54	6330403K07Rik	5+22
4.96754e-54	-0.514253	0.335	0.671	1.28177e-49	Sparcl1	5+22
7.10728e-54	-0.508389	0.12	0.433	1.83389e-49	Ppp1r3g	5+22
1.18175e-53	-0.485867	0.026	0.302	3.04927e-49	Gsx2	5+22
3.32284e-53	-0.675422	0.375	0.647	8.57391e-49	Thrsp	5+22
4.22576e-53	-0.666547	0.161	0.469	1.09037e-48	Snhg15	5+22
7.03394e-52	-0.537507	0.353	0.64	1.81497e-47	Pax6	5+22
1.83945e-45	-0.504449	0.208	0.51	4.74632e-41	Tnc	5+22
1.98071e-44	-0.771437	0.149	0.421	5.11082e-40	Kcnip4	5+22
2.1929e-42	-0.424201	0.095	0.354	5.65834e-38	Arx	5+22
4.13282e-42	-0.838106	0.241	0.514	1.06639e-37	Dcun1d4	5+22
2.59478e-41	-0.428224	0.841	0.907	6.69531e-37	Coq10b	5+22
2.47084e-40	-0.469565	0.144	0.402	6.37552e-36	Gm26512	5+22
7.26126e-40	-0.35023	0.318	0.579	1.87362e-35	Ppp1r1a	5+22
3.82395e-39	-0.352787	0.084	0.328	9.86693e-35	Egln3	5+22
9.12725e-38	-0.787266	0.438	0.632	2.3551e-33	Emd	5+22
1.78088e-37	-0.373	0.135	0.385	4.59521e-33	Pmepa1	5+22
3.06092e-37	-0.514097	0.42	0.658	7.89808e-33	Tbl3	5+22
2.06429e-36	-0.395254	0.71	0.851	5.32649e-32	Ednrb	5+22
6.32795e-35	-0.37935	0.962	0.983	1.6328e-30	Mt2	5+22
1.35822e-34	-0.412805	0.277	0.516	3.50461e-30	Garnl3	5+22
2.86907e-34	-0.300975	0.833	0.924	7.40306e-30	Rgcc	5+22
3.66393e-34	-0.45504	0.614	0.8	9.45405e-30	Rgs6	5+22
4.90742e-34	-0.490479	0.597	0.749	1.26626e-29	Sgip1	5+22
5.40747e-34	-0.493621	0.264	0.518	1.39529e-29	Dcc	5+22
9.4618e-34	-0.44082	0.365	0.592	2.44143e-29	Gsn	5+22
5.26817e-33	-0.348818	0.702	0.85	1.35935e-28	Htra1	5+22
8.53159e-32	-0.490097	0.127	0.342	2.20141e-27	Pak3	5+22
3.62949e-31	-0.669186	0.945	0.966	9.36516e-27	Dad1	5+22
7.92316e-31	-0.298701	0.093	0.302	2.04441e-26	Gm10563	5+22
8.36967e-31	-0.290968	0.068	0.271	2.15963e-26	Pls1	5+22
1.01313e-29	-0.384021	0.705	0.823	2.61419e-25	Usp2	5+22
1.0686e-29	-0.265342	0.122	0.337	2.75731e-25	St8sia1	5+22
1.35618e-28	-0.254108	0.021	0.187	3.49935e-24	Hopx	5+22
2.64852e-28	-0.58437	0.518	0.714	6.83399e-24	Gfap	5+22
2.85416e-28	-0.653728	0.149	0.35	7.3646e-24	Trmt61b	5+22
6.76957e-28	-0.328354	0.567	0.715	1.74675e-23	Ssbp3	5+22
7.10338e-28	-0.48315	0.133	0.335	1.83289e-23	Man1b1	5+22
1.03077e-26	-0.50685	0.348	0.537	2.6597e-22	Gltscr2	5+22
1.66889e-26	-0.438529	0.38	0.569	4.30625e-22	Nol4	5+22
1.72207e-26	-0.267615	0.144	0.35	4.44346e-22	Adam23	5+22
2.69896e-26	-0.485967	0.673	0.775	6.96412e-22	Braf	5+22
1.87459e-25	-0.3943	0.756	0.834	4.83701e-21	Btbd9	5+22
5.97705e-25	-0.277586	0.149	0.346	1.54226e-20	Kcnk10	5+22
8.8489e-25	-0.387597	0.137	0.327	2.28328e-20	Isy1	5+22
1.05529e-24	-0.298463	0.962	0.982	2.72296e-20	Ptprz1	5+22
5.24561e-24	-0.281288	0.088	0.265	1.35352e-19	Flrt2	5+22
1.60354e-23	-0.345843	0.684	0.783	4.13763e-19	Trim2	5+22
7.17147e-23	-0.387732	0.471	0.655	1.85046e-18	Thbs4	5+22
2.21904e-22	-0.376785	0.376	0.566	5.7258e-18	Mpp7	5+22
2.60115e-22	-0.285956	0.23	0.421	6.71174e-18	Cacna2d1	5+22
2.66447e-22	-0.344336	0.537	0.659	6.87514e-18	Tox3	5+22
1.02889e-21	-0.292213	0.911	0.953	2.65484e-17	Dlgap1	5+22
3.68479e-21	-0.356184	0.413	0.575	9.50786e-17	Pard6a	5+22
6.22311e-21	-0.271539	0.597	0.714	1.60575e-16	Chic2	5+22
1.40374e-20	-0.61507	0.298	0.455	3.62206e-16	Nr4a2	5+22
1.46193e-19	-0.47095	0.556	0.658	3.77221e-15	Cstb	5+22
1.78832e-19	-0.263848	0.324	0.515	4.6144e-15	Lama2	5+22
5.9746e-19	-0.303129	0.863	0.89	1.54163e-14	Fgfr2	5+22
6.74645e-19	-0.290579	0.906	0.944	1.74079e-14	Nkain2	5+22
7.86456e-19	-0.274468	0.346	0.518	2.02929e-14	Lrp4	5+22
1.3136e-18	-0.404136	0.511	0.66	3.38949e-14	Nr4a3	5+22
3.26402e-18	-0.361882	0.603	0.694	8.42215e-14	Ccnl1	5+22
3.50924e-18	-0.279414	0.692	0.775	9.0549e-14	Impact	5+22
9.11117e-18	-0.272464	0.852	0.876	2.35095e-13	Map1lc3a	5+22
4.63829e-17	-0.264005	0.571	0.698	1.19682e-12	Bmyc	5+22
8.78665e-17	-0.298895	0.724	0.825	2.26722e-12	Ccnd2	5+22
1.53763e-16	-0.407159	0.746	0.82	3.96754e-12	Mapt	5+22
1.72845e-16	-0.336604	0.906	0.93	4.45992e-12	Igfbp5	5+22
5.98129e-15	-0.381516	0.295	0.426	1.54335e-10	Cwc25	5+22
8.21859e-15	-0.270383	0.346	0.49	2.12064e-10	Hps4	5+22
1.90586e-14	-0.264434	0.365	0.51	4.9177e-10	Ankrd6	5+22
2.24939e-14	-0.252484	0.244	0.383	5.80411e-10	Epha4	5+22
1.19926e-13	-0.311489	0.962	0.975	3.09446e-09	Rorb	5+22
2.20838e-13	-0.673555	0.725	0.817	5.69828e-09	Nrxn3	5+22
2.44867e-13	-0.313276	0.064	0.171	6.31832e-09	Pcdh15	5+22
2.62402e-13	-0.250859	0.237	0.377	6.77076e-09	Adamts9	5+22
3.65839e-13	-0.291972	0.329	0.462	9.43973e-09	Jmy	5+22
1.47983e-12	-0.390197	0.434	0.523	3.8184e-08	Ddx3y	5+22
2.36139e-12	-0.253058	0.567	0.654	6.0931e-08	Degs1	5+22
1.27542e-11	-0.308944	0.222	0.345	3.29098e-07	Adamts1	5+22
1.71347e-11	-0.401216	0.532	0.644	4.42127e-07	Pde10a	5+22
4.51368e-10	-0.285728	0.336	0.446	1.16467e-05	St7	5+22
7.46682e-10	-0.263254	0.251	0.366	1.92666e-05	Phlda1	5+22
6.07719e-09	-0.269923	0.612	0.677	0.00015681	Pmvk	5+22
6.86921e-08	-0.292631	0.821	0.822	0.00177246	Cebpb	5+22
1.15019e-07	-0.256253	0.829	0.88	0.00296782	Tubb5	5+22
3.68627e-07	-0.264735	0.59	0.645	0.00951168	Zdbf2	5+22
8.26227e-07	-0.343617	0.237	0.31	0.0213191	Rgs2	5+22

## Sheet: Sheet2
p_val	avg_logFC	pct.1	pct.2	p_val_adj	cluster	gene
1.40975e-162	1.26093	0.855	0.505	3.63758e-158	5	Vps37b
3.82779e-161	1.61305	0.897	0.596	9.87683e-157	5	Cdk11b
1.0134e-151	0.770055	1	0.981	2.61488e-147	5	Slc25a3
5.26645e-138	1.08609	0.959	0.827	1.3589e-133	5	Arih1
6.23307e-136	0.482804	1	0.997	1.60832e-131	5	Ntrk2
2.94193e-120	0.606532	0.993	0.975	7.59106e-116	5	6330403K07Rik
8.08982e-118	0.665917	0.963	0.787	2.08742e-113	5	Coq10b
4.46216e-113	0.472817	1	0.991	1.15137e-108	5	Fos
6.05018e-106	0.69245	0.979	0.931	1.56113e-101	5	Dclk1
4.2478e-102	0.660086	0.989	0.944	1.09606e-97	5	Slc15a2
3.83036e-94	0.619982	0.9	0.639	9.88349e-90	5	Usp2
6.38085e-92	0.781989	0.54	0.155	1.64645e-87	5	Snhg15
1.52232e-90	1.00168	0.63	0.251	3.92805e-86	5	Urah
9.24368e-87	0.440638	0.999	0.973	2.38515e-82	5	Egr1
4.53338e-81	0.666212	0.738	0.382	1.16975e-76	5	Tbl3
3.99067e-80	0.992385	0.698	0.406	1.02971e-75	5	Emd
6.70471e-80	0.422859	1	0.998	1.73002e-75	5	Jund
1.40005e-75	0.489757	0.999	0.944	3.61255e-71	5	Btg2
1.78783e-75	0.352346	0.917	0.527	4.61315e-71	5	Pla2g7
8.614e-69	0.695157	0.75	0.437	2.22267e-64	5	Nr4a3
4.93733e-67	0.840054	0.977	0.937	1.27398e-62	5	Dad1
5.03884e-67	0.580139	0.544	0.21	1.30017e-62	5	Dio2
3.9975e-64	0.667953	0.83	0.631	1.03148e-59	5	Braf
7.51143e-63	0.625293	0.905	0.714	1.93817e-58	5	Cebpb
4.14382e-62	0.487658	0.336	0.059	1.06923e-57	5	Gsx2
3.07445e-59	0.360376	0.999	0.99	7.93301e-55	5	Clu
4.62843e-58	0.571355	0.892	0.661	1.19428e-53	5	Maff
4.95211e-57	0.662116	0.6	0.32	1.27779e-52	5	Gltscr2
1.96649e-55	0.516062	0.819	0.574	5.07414e-51	5	Nr4a1
1.5813e-51	0.415959	0.905	0.821	4.08024e-47	5	Map1lc3a
1.15645e-50	0.360004	0.347	0.093	2.98399e-46	5	Gm10563
4.19769e-50	0.492255	0.636	0.379	1.08313e-45	5	Pard6a
5.64773e-50	0.769248	0.518	0.26	1.45728e-45	5	Nr4a2
1.42722e-49	0.504316	0.859	0.746	3.68265e-45	5	Btbd9
1.45027e-49	0.306729	0.951	0.747	3.74214e-45	5	Nrg1
1.53757e-49	0.399674	0.996	0.965	3.9674e-45	5	Junb
3.97938e-48	0.436552	0.941	0.746	1.0268e-43	5	Homer1
2.71739e-47	0.766237	0.394	0.148	7.01167e-43	5	Trmt61b
5.48347e-47	0.463257	0.449	0.185	1.4149e-42	5	Ppp1r3g
8.05384e-47	0.457967	0.434	0.174	2.07813e-42	5	Gm26512
1.02994e-45	0.38271	0.94	0.837	2.65754e-41	5	Rgcc
1.13978e-45	0.484057	0.75	0.556	2.94097e-41	5	Ccnl1
3.29958e-45	0.520913	0.62	0.359	8.51391e-41	5	Mpp7
3.48413e-45	0.485023	0.374	0.13	8.9901e-41	5	Isy1
4.6404e-45	0.343355	0.947	0.854	1.19736e-40	5	Atf4
1.08939e-44	0.616574	0.709	0.519	2.81095e-40	5	Cstb
1.13876e-44	0.699015	0.715	0.473	2.93834e-40	5	Pde10a
2.86112e-42	0.45749	0.985	0.917	7.38254e-38	5	Ier2
3.36457e-42	0.424916	0.94	0.797	8.68159e-38	5	Cyr61
3.43739e-42	0.475653	0.833	0.623	8.86949e-38	5	Rgs6
5.20948e-42	0.369407	0.993	0.955	1.3442e-37	5	Mt2
3.95769e-37	0.430679	0.67	0.429	1.0212e-32	5	Sparcl1
6.46653e-37	0.365749	0.549	0.311	1.66856e-32	5	Hps4
9.47277e-36	0.534161	0.364	0.151	2.44426e-31	5	Man1b1
1.86262e-35	0.435232	0.824	0.683	4.80611e-31	5	Tsc22d3
2.4858e-35	0.273898	0.706	0.449	6.4141e-31	5	Epha5
2.62716e-35	0.34976	0.973	0.931	6.77887e-31	5	Tubb2a
2.74417e-35	0.280225	0.296	0.093	7.08079e-31	5	Tmem198
1.91424e-34	0.26204	0.363	0.144	4.93932e-30	5	Ppp1r1b
2.03581e-34	0.586154	0.432	0.209	5.25299e-30	5	Kcnip4
2.12914e-34	0.397306	0.62	0.392	5.49383e-30	5	Gsn
3.18088e-33	0.487042	0.473	0.271	8.20764e-29	5	Cwc25
3.80413e-33	0.26524	0.982	0.925	9.81579e-29	5	Pnrc1
5.85695e-32	0.416237	0.757	0.558	1.51127e-27	5	Gpc5
8.25006e-32	0.262786	0.931	0.867	2.12876e-27	5	Enho
4.44878e-31	0.373207	0.801	0.643	1.14792e-26	5	Insig1
1.91191e-30	0.334982	0.807	0.674	4.9333e-26	5	Impact
2.48271e-30	0.317533	0.904	0.851	6.40614e-26	5	Rheb
3.28396e-30	0.519871	0.833	0.707	8.47361e-26	5	Ppp1r15a
1.02907e-29	0.639272	0.524	0.304	2.65531e-25	5	Dcun1d4
1.64727e-28	0.322845	1	0.997	4.25045e-24	5	Mt1
1.68843e-28	0.375772	0.892	0.763	4.35666e-24	5	Id2
2.14621e-28	0.302437	0.779	0.631	5.53786e-24	5	Ttc19
2.37045e-28	0.26431	0.441	0.236	6.11647e-24	5	Rnf26
2.99966e-28	0.275414	0.977	0.957	7.74002e-24	5	Btg1
3.95742e-28	0.27086	0.914	0.855	1.02113e-23	5	BC031181
4.24846e-28	0.51284	0.563	0.408	1.09623e-23	5	Ddx3y
1.17339e-27	0.453799	0.696	0.539	3.02769e-23	5	Zdbf2
2.13623e-27	0.250658	0.938	0.866	5.51211e-23	5	Rpl22l1
1.36371e-26	0.263494	0.867	0.72	3.51878e-22	5	Htra1
3.22748e-26	0.264153	0.527	0.325	8.32786e-22	5	Per1
6.13225e-26	0.280235	0.638	0.431	1.5823e-21	5	Rbp1
9.59834e-26	0.402588	0.637	0.463	2.47666e-21	5	Thrsp
1.24536e-25	0.352827	0.784	0.608	3.21341e-21	5	Id1
1.28194e-25	0.275307	0.858	0.74	3.30779e-21	5	Ednrb
1.17849e-24	0.540713	0.718	0.567	3.04087e-20	5	Gfap
5.49055e-24	0.325345	0.525	0.339	1.41673e-19	5	Atxn7
8.40549e-24	0.333526	0.411	0.232	2.16887e-19	5	Adamts9
1.30011e-23	0.32296	0.841	0.729	3.35466e-19	5	Idi1
1.99413e-23	0.299552	0.883	0.818	5.14546e-19	5	Ifrd1
5.69267e-23	0.260746	0.737	0.6	1.46888e-18	5	Chic2
8.27939e-23	0.25774	0.579	0.395	2.13633e-18	5	Sik1
1.9093e-22	0.355004	0.435	0.256	4.92658e-18	5	Opa3
3.03883e-22	0.32721	0.583	0.428	7.84109e-18	5	Gm15210
3.67685e-22	0.364093	0.712	0.585	9.48739e-18	5	Pmvk
3.70877e-22	0.321505	0.893	0.866	9.56975e-18	5	Fgfr2
4.69927e-22	0.297651	0.773	0.65	1.21255e-17	5	Ralgapa1
8.32444e-22	0.347389	0.493	0.326	2.14795e-17	5	Jmy
1.65996e-21	0.308534	0.455	0.289	4.28319e-17	5	Oxnad1
3.86206e-21	0.306169	0.627	0.485	9.96528e-17	5	Pim3
5.44537e-21	0.297022	0.732	0.59	1.40507e-16	5	Taf13
6.30066e-20	0.291253	0.521	0.356	1.62576e-15	5	Sclt1
2.02034e-19	0.315982	0.897	0.857	5.21308e-15	5	Tsc22d1
2.23863e-19	0.271832	0.76	0.636	5.77635e-15	5	Ppp1r3c
2.60655e-19	0.25793	0.676	0.54	6.72569e-15	5	Dph3
1.00413e-18	0.251248	0.496	0.308	2.59097e-14	5	Tnc
1.25556e-18	0.252656	0.443	0.29	3.23973e-14	5	Brms1
1.9971e-18	0.273401	0.847	0.792	5.15313e-14	5	Slc3a2
3.60078e-18	0.445117	0.347	0.209	9.29108e-14	5	Rgs2
6.15396e-18	0.264231	0.54	0.375	1.58791e-13	5	D030047H15Rik
9.00289e-18	0.348325	0.799	0.747	2.32302e-13	5	Zswim6
1.90155e-17	0.291157	0.604	0.456	4.90658e-13	5	Ptp4a1
2.12897e-17	0.291451	0.997	0.994	5.49337e-13	5	Jun
2.77581e-17	0.25561	0.751	0.616	7.16243e-13	5	Ndel1
1.59546e-16	0.293165	0.87	0.852	4.11677e-12	5	Snu13
3.48711e-16	0.273166	0.229	0.106	8.99779e-12	5	Rnf138rt1
4.47929e-16	0.260608	0.415	0.273	1.15579e-11	5	Usp36
8.89676e-16	0.271242	0.613	0.482	2.29563e-11	5	Spry2
1.15897e-15	0.28147	0.759	0.66	2.99048e-11	5	Anxa2
1.38299e-15	0.360474	0.616	0.5	3.56854e-11	5	Pdzrn3
8.05976e-15	0.258186	0.661	0.514	2.07966e-10	5	Thbs4
4.95419e-14	0.27056	0.85	0.786	1.27833e-09	5	Tiparp
2.8173e-13	0.326208	0.976	0.965	7.26948e-09	5	Rorb
5.22346e-13	0.396461	0.258	0.149	1.34781e-08	5	Lcmt2
1.67751e-12	0.315917	0.438	0.325	4.32848e-08	5	Nolc1
6.59557e-12	0.36116	0.558	0.465	1.70186e-07	5	Pak1
7.75112e-12	0.308128	0.462	0.346	2.00002e-07	5	St7
1.65882e-10	0.278382	0.385	0.276	4.28027e-06	5	Otud1
1.90945e-10	0.278582	0.733	0.66	4.92696e-06	5	Sgip1
2.88171e-10	0.339883	0.838	0.789	7.43567e-06	5	Hes1
9.75051e-10	0.520732	0.768	0.709	2.51592e-05	5	Hes5
1.24162e-09	0.454528	0.333	0.238	3.20375e-05	5	Uty
2.07125e-09	0.283478	0.42	0.324	5.34445e-05	5	Ythdc1
2.45231e-08	0.364415	0.76	0.755	0.000632769	5	Nap1l5
4.6719e-08	0.278564	0.604	0.522	0.00120549	5	Klhl7
4.95805e-08	0.291539	0.546	0.467	0.00127932	5	March3
9.76363e-08	0.254504	0.822	0.798	0.00251931	5	Rfx4
1.79382e-07	0.332487	0.432	0.363	0.00462859	5	Kcnu1
3.49228e-07	0.307523	0.819	0.767	0.00901113	5	Mapt
0	2.03923	0.894	0.103	0	14	Crym
8.19797e-158	0.85876	0.646	0.136	2.11532e-153	14	Dpyd
1.16155e-151	0.83574	0.71	0.189	2.99715e-147	14	Adgrl3
1.28861e-147	0.962419	0.779	0.26	3.32501e-143	14	Ncam2
4.91074e-139	0.654125	0.995	0.956	1.26712e-134	14	Itm2c
3.92366e-122	0.805547	0.945	0.679	1.01242e-117	14	Frmd4a
3.8905e-113	1.00151	0.91	0.533	1.00387e-108	14	Cebpd
1.22034e-106	0.726026	0.711	0.266	3.14884e-102	14	Grm3
8.8274e-103	0.684076	0.749	0.328	2.27773e-98	14	Riiad1
7.25945e-102	0.531333	0.495	0.109	1.87315e-97	14	C1ql3
1.51132e-98	0.582197	0.523	0.133	3.89965e-94	14	Notum
3.76959e-95	0.972453	0.827	0.444	9.72666e-91	14	Klf2
9.43274e-95	0.632397	0.995	0.944	2.43393e-90	14	S100a6
2.21561e-90	0.351395	1	1	5.71694e-86	14	Gpm6b
3.12517e-86	0.483652	0.553	0.17	8.06388e-82	14	Spon1
5.84686e-83	0.369653	0.332	0.044	1.50867e-78	14	Lmo1
1.64686e-82	0.520098	0.386	0.071	4.24938e-78	14	Nkx6-2
1.19078e-81	0.557788	0.89	0.538	3.07256e-77	14	Lxn
9.45769e-79	0.623872	0.982	0.891	2.44037e-74	14	Fabp7
2.1549e-75	0.490838	0.613	0.246	5.5603e-71	14	Pter
3.23372e-75	0.546825	0.684	0.362	8.34396e-71	14	Basp1
1.60159e-73	0.566745	0.878	0.614	4.13258e-69	14	Ptprt
1.40917e-72	0.62904	0.703	0.35	3.63609e-68	14	S100a4
2.95134e-70	0.72512	0.461	0.141	7.61535e-66	14	Slit2
4.37054e-68	0.463974	0.993	0.966	1.12773e-63	14	Pbx1
2.84392e-66	0.678156	0.507	0.198	7.33816e-62	14	Adamts18
8.63486e-66	0.560384	0.901	0.681	2.22805e-61	14	Ntm
1.49694e-65	0.41532	0.999	0.994	3.86256e-61	14	Slc1a3
2.63984e-64	0.4377	0.898	0.667	6.81159e-60	14	Hmgcs2
2.47967e-63	0.43202	0.991	0.933	6.39829e-59	14	Tmem47
5.05326e-55	0.43176	0.546	0.247	1.30389e-50	14	Tmem176b
1.97567e-54	0.45808	0.463	0.167	5.09781e-50	14	Ptprn2
1.61383e-51	0.587712	0.703	0.432	4.16416e-47	14	Egr2
1.89767e-50	0.309269	0.342	0.097	4.89655e-46	14	Rbms1
2.22042e-50	0.671685	0.48	0.195	5.72934e-46	14	Fas
1.41746e-49	0.253111	1	0.999	3.65747e-45	14	Itm2b
6.31935e-49	0.307226	0.391	0.131	1.63058e-44	14	Cpne8
9.50818e-49	0.460085	0.763	0.486	2.4534e-44	14	Ramp1
1.68121e-48	0.348205	0.336	0.096	4.33803e-44	14	Fam183b
4.32655e-48	0.579221	0.672	0.399	1.11638e-43	14	Slc38a1
1.10409e-47	0.451611	0.884	0.7	2.84889e-43	14	Serpine2
2.70657e-47	0.440595	0.471	0.192	6.98377e-43	14	Sgcd
5.35159e-47	0.424674	0.761	0.501	1.38087e-42	14	Selenop
8.12775e-46	0.475337	0.8	0.572	2.0972e-41	14	Prex2
9.28447e-45	0.46212	0.506	0.238	2.39567e-40	14	Foxj1
2.7929e-44	0.38747	0.765	0.51	7.20652e-40	14	Lhfp
5.07303e-44	0.402759	0.844	0.64	1.30899e-39	14	Phyhipl
5.31831e-44	0.315528	0.416	0.162	1.37228e-39	14	Ccdc170
9.16973e-44	0.352704	0.6	0.32	2.36607e-39	14	Ifi27
4.18423e-43	0.824684	0.37	0.134	1.07966e-38	14	Prss56
5.50686e-43	0.518576	0.447	0.198	1.42094e-38	14	Col5a2
6.80412e-42	0.329392	0.593	0.326	1.75567e-37	14	Fmo1
1.42306e-41	0.392711	0.549	0.278	3.67193e-37	14	C4b
3.03419e-41	0.39441	0.618	0.356	7.82912e-37	14	Cnp
5.18558e-41	0.53577	0.796	0.59	1.33803e-36	14	Slc4a4
2.74871e-40	0.315908	0.315	0.1	7.09249e-36	14	Capsl
4.40533e-40	0.413052	0.723	0.473	1.13671e-35	14	Mlf1
2.50745e-39	0.254932	0.261	0.071	6.46997e-35	14	Tmem176a
2.63323e-39	0.362397	0.758	0.489	6.79452e-35	14	Grik2
5.11133e-39	0.269663	0.995	0.997	1.31888e-34	14	Cspg5
5.64693e-39	0.420614	0.868	0.68	1.45708e-34	14	Klf6
2.12546e-38	0.312706	0.766	0.55	5.48434e-34	14	Ncam1
7.34825e-38	0.257502	0.319	0.109	1.89607e-33	14	Itih5
8.49006e-38	0.338218	0.268	0.076	2.19069e-33	14	Car8
1.12071e-37	0.39605	0.975	0.936	2.89176e-33	14	Hsp90aa1
1.13881e-37	0.355985	0.6	0.363	2.93847e-33	14	Crot
1.46721e-37	0.378354	0.454	0.209	3.78583e-33	14	Cacnb2
2.60231e-37	0.279753	0.386	0.154	6.71473e-33	14	Apbb2
5.4029e-37	0.280844	0.986	0.95	1.39411e-32	14	Tspan7
1.11606e-36	0.331843	0.63	0.379	2.87977e-32	14	Adcyap1r1
3.74808e-36	0.521233	0.642	0.399	9.67118e-32	14	Ifitm3
5.13834e-36	0.337111	0.282	0.09	1.32585e-31	14	Serpinb1a
5.51787e-36	0.352796	0.69	0.444	1.42378e-31	14	Tppp3
1.37078e-35	0.462675	0.745	0.551	3.53704e-31	14	Sorbs1
2.87511e-35	0.39263	0.867	0.681	7.41865e-31	14	Hdac9
3.11692e-35	0.324679	0.952	0.863	8.04258e-31	14	Pantr1
3.51651e-35	0.270365	0.652	0.382	9.07366e-31	14	Six3
3.10033e-34	0.397082	0.476	0.235	7.99979e-30	14	Aqp4
5.23122e-34	0.432458	0.387	0.164	1.34981e-29	14	Arc
1.12763e-33	0.289122	0.949	0.846	2.90962e-29	14	Scg3
1.55717e-33	0.379733	0.821	0.682	4.01796e-29	14	Sfrp1
3.42063e-33	0.289795	0.352	0.14	8.82626e-29	14	Efna5
4.44936e-33	0.361977	0.55	0.311	1.14807e-28	14	Ptpn12
6.91537e-33	0.32845	0.859	0.706	1.78437e-28	14	Mgst1
1.01225e-32	0.325159	0.722	0.499	2.61192e-28	14	Gng12
2.04986e-32	0.298853	0.327	0.128	5.28924e-28	14	Sntb1
2.22581e-32	0.284704	0.956	0.891	5.74325e-28	14	Acot1
2.3962e-32	0.299181	0.593	0.34	6.18291e-28	14	Pltp
3.94159e-32	0.30041	0.554	0.305	1.01705e-27	14	Irf1
9.03074e-32	0.341904	0.575	0.35	2.3302e-27	14	Il6st
9.92812e-32	0.351032	0.876	0.725	2.56175e-27	14	Timp3
1.00249e-31	0.491629	0.503	0.283	2.58673e-27	14	Nfatc2
3.98444e-31	0.332716	0.335	0.138	1.0281e-26	14	Pros1
3.74928e-30	0.432898	0.707	0.488	9.67426e-26	14	9330159F19Rik
2.70191e-29	0.27313	0.414	0.208	6.97173e-25	14	Lgr4
4.07891e-29	0.286954	0.888	0.715	1.05248e-24	14	Selenom
5.13148e-29	0.250433	0.461	0.243	1.32408e-24	14	Plekhm3
2.63853e-28	0.274952	0.962	0.877	6.80819e-24	14	S100a16
5.12344e-28	0.267921	0.392	0.189	1.322e-23	14	Cables1
7.27408e-28	0.307281	0.898	0.733	1.87693e-23	14	Gpr37l1
9.02806e-28	0.391191	0.579	0.359	2.32951e-23	14	Socs3
5.46842e-27	0.317126	0.638	0.427	1.41102e-22	14	Sema6a
1.22304e-26	0.257972	0.625	0.416	3.1558e-22	14	Tspan15
1.63322e-26	0.345953	0.641	0.424	4.21419e-22	14	Usp53
1.23928e-25	0.295119	0.671	0.473	3.19773e-21	14	Bcl2
1.60192e-25	0.2599	0.417	0.228	4.13344e-21	14	Gpld1
3.43217e-25	0.278974	0.987	0.951	8.85602e-21	14	Sox9
4.57655e-25	0.3035	0.684	0.493	1.18089e-20	14	Foxo1
5.16361e-25	0.280746	0.429	0.239	1.33237e-20	14	Jak2
2.8991e-24	0.322732	0.668	0.471	7.48055e-20	14	Enkur
6.17756e-24	0.273885	0.358	0.178	1.594e-19	14	Prickle2
6.27623e-24	0.254879	0.463	0.261	1.61946e-19	14	Foxp1
8.35607e-24	0.369426	0.861	0.746	2.15612e-19	14	Stat3
8.42715e-24	0.336158	0.613	0.403	2.17446e-19	14	Txnip
1.52182e-23	0.262276	0.771	0.584	3.92676e-19	14	Abca1
1.89171e-23	0.395826	0.55	0.371	4.88117e-19	14	Arl13b
3.02809e-23	0.316656	0.933	0.837	7.81338e-19	14	B3galt1
4.86864e-23	0.311404	0.642	0.428	1.25626e-18	14	Tsc22d2
4.98852e-23	0.262865	0.631	0.431	1.28719e-18	14	Oxr1
1.84744e-22	0.255073	0.495	0.301	4.76695e-18	14	Mertk
2.52952e-22	0.275347	0.254	0.107	6.52692e-18	14	Necab2
2.7598e-22	0.25735	0.452	0.266	7.1211e-18	14	Ccdc114
1.64498e-21	0.31473	0.914	0.751	4.24454e-17	14	Meg3
1.76512e-21	0.271782	0.869	0.756	4.55455e-17	14	Myo6
3.52691e-21	0.250822	0.486	0.299	9.10049e-17	14	Mns1
1.29697e-20	0.300898	0.841	0.7	3.34658e-16	14	Hdac8
2.14106e-20	0.392969	0.719	0.548	5.52456e-16	14	Gm10561
3.72303e-20	0.313517	0.507	0.329	9.60654e-16	14	Gabrg3
5.75313e-20	0.269977	0.705	0.519	1.48448e-15	14	Ldha
8.01212e-20	0.286599	0.467	0.286	2.06737e-15	14	Slc6a6
8.43398e-20	0.341088	0.633	0.456	2.17622e-15	14	Slc7a11
1.18882e-19	0.319683	0.336	0.18	3.06752e-15	14	Serpina3n
5.37931e-19	0.25001	0.536	0.367	1.38802e-14	14	Itih3
1.37179e-18	0.26745	0.267	0.123	3.53962e-14	14	Emp1
2.02946e-18	0.257059	0.837	0.702	5.23661e-14	14	Arap2
4.95718e-18	0.251712	0.86	0.743	1.2791e-13	14	Hist1h2bc
5.64834e-18	0.439496	0.647	0.5	1.45744e-13	14	Atf3
1.24512e-17	0.362556	0.846	0.721	3.21277e-13	14	Dnajb1
2.71348e-17	0.30568	0.724	0.574	7.00158e-13	14	Zfp608
9.5899e-17	0.253567	0.331	0.184	2.47448e-12	14	Spag16
2.52562e-16	0.259467	0.651	0.507	6.51686e-12	14	Nrcam
4.05994e-16	0.289983	0.599	0.441	1.04759e-11	14	Myo1e
7.53536e-16	0.364769	0.796	0.698	1.94435e-11	14	Pde4b
1.77314e-15	0.268098	0.578	0.438	4.57524e-11	14	Arhgef4
3.18272e-15	0.265125	0.643	0.482	8.21238e-11	14	Gclc
6.8693e-15	0.281303	0.523	0.36	1.77249e-10	14	Ankrd28
1.22767e-14	0.297259	0.588	0.451	3.16776e-10	14	Etv6
2.66732e-14	0.368503	0.787	0.668	6.88249e-10	14	Bmpr1b
4.09426e-14	0.253786	0.444	0.3	1.05644e-09	14	Dcun1d3
2.33416e-13	0.405516	0.675	0.549	6.02284e-09	14	Dst
3.91523e-13	0.280998	0.81	0.707	1.01025e-08	14	Zfp36
1.50205e-11	0.273296	0.797	0.712	3.87573e-07	14	Vcl
2.08949e-11	0.300608	0.702	0.605	5.39152e-07	14	Tanc2
9.71701e-09	0.272365	0.11	0.047	0.000250728	14	Cxcl1
1.97805e-08	0.453474	0.735	0.709	0.000510397	14	Nnat
3.86216e-08	0.269132	0.847	0.77	0.000996554	14	Gadd45g
3.0693e-87	1.03731	0.712	0.226	7.91971e-83	22	Gm29260
5.49586e-61	0.509014	0.438	0.097	1.4181e-56	22	Kctd1
2.53541e-53	0.983566	0.729	0.329	6.54212e-49	22	Anks1b
1.11128e-49	1.34206	0.517	0.189	2.86742e-45	22	Cntnap2
5.46737e-48	0.510891	0.356	0.081	1.41075e-43	22	Dscaml1
8.60645e-47	0.850527	0.976	0.846	2.22072e-42	22	Nrg1
4.12383e-44	0.790402	0.89	0.726	1.06407e-39	22	Pla2g7
2.47049e-42	0.539722	1	0.999	6.3746e-38	22	Mir99ahg
4.04589e-42	0.918031	0.534	0.197	1.04396e-37	22	Nav3
2.05621e-40	0.580883	0.839	0.59	5.30565e-36	22	Tox3
4.62804e-38	0.533385	0.993	0.949	1.19417e-33	22	Nfib
6.89159e-36	0.71708	0.36	0.106	1.77824e-31	22	Pcdh15
7.50023e-36	0.576366	0.716	0.442	1.93528e-31	22	Phactr1
1.95398e-35	0.375203	0.257	0.054	5.04185e-31	22	Elavl4
4.41699e-33	0.507123	0.87	0.626	1.13972e-28	22	Setbp1
7.60262e-33	1.04928	0.49	0.199	1.9617e-28	22	Dlx6os1
1.15791e-32	0.599167	0.295	0.079	2.98776e-28	22	Igfbpl1
2.03915e-32	0.611255	0.541	0.263	5.26161e-28	22	Gm4258
3.06304e-32	0.787564	0.699	0.401	7.90355e-28	22	Dcc
4.88525e-32	0.750745	0.781	0.472	1.26054e-27	22	Nol4
2.86255e-31	0.581012	0.986	0.939	7.38625e-27	22	Pcdh9
4.76322e-31	0.622319	0.514	0.239	1.22905e-26	22	Arx
2.10428e-30	0.829079	0.771	0.45	5.42968e-26	22	Tmsb10
6.23642e-30	1.64272	0.955	0.765	1.60918e-25	22	Nrxn3
9.51462e-30	0.330892	0.127	0.013	2.45506e-25	22	Gm38505
1.48875e-29	0.371251	0.229	0.051	3.84141e-25	22	Sp9
5.6676e-29	0.299982	0.253	0.064	1.46241e-24	22	Lmo3
1.49998e-28	0.499968	0.298	0.088	3.87039e-24	22	March1
3.37452e-28	0.408937	0.901	0.731	8.70727e-24	22	Trim2
7.28204e-28	0.968439	0.336	0.115	1.87898e-23	22	Stmn2
1.61161e-27	0.291849	0.212	0.047	4.15843e-23	22	Nsg2
9.14623e-27	0.972885	0.955	0.84	2.36e-22	22	Sox2ot
1.76214e-26	0.385669	1	0.985	4.54685e-22	22	Auts2
3.51848e-26	0.630293	0.473	0.228	9.07874e-22	22	Mpped2
1.48665e-25	0.406495	0.997	0.973	3.836e-21	22	Ptprz1
1.70672e-25	0.385026	0.356	0.132	4.40386e-21	22	Rn7sk
1.81223e-25	0.457841	0.394	0.157	4.67611e-21	22	Gm9844
2.16814e-25	0.465153	0.233	0.06	5.59445e-21	22	Nrg3
9.30868e-25	0.388901	0.928	0.819	2.40192e-20	22	C130071C03Rik
2.02713e-24	0.413468	0.993	0.988	5.2306e-20	22	Cadm2
2.02788e-24	0.463687	0.897	0.708	5.23255e-20	22	Ccdc88a
5.4809e-24	0.558686	0.558	0.3	1.41424e-19	22	Mdga2
8.20099e-23	0.474351	0.733	0.523	2.1161e-18	22	Pax6
1.29123e-22	0.436797	0.661	0.437	3.33177e-18	22	Lrp4
3.6503e-22	0.360499	0.493	0.255	9.41886e-18	22	Kcnk10
6.53589e-22	0.45253	0.182	0.044	1.68646e-17	22	Gad2
6.55698e-22	0.377897	0.432	0.201	1.6919e-17	22	Cdon
8.8791e-22	0.59152	0.421	0.198	2.29108e-17	22	Plcl1
1.28007e-21	0.549462	0.274	0.095	3.30297e-17	22	Celf4
2.63692e-21	0.394226	0.911	0.748	6.80405e-17	22	Zeb1
6.91184e-21	0.342428	1	0.996	1.78346e-16	22	Tcf4
1.38773e-20	0.448703	0.733	0.565	3.58075e-16	22	Gm17750
2.47035e-20	0.274302	0.332	0.133	6.37426e-16	22	D930015E06Rik
3.41068e-20	0.289911	0.14	0.028	8.80057e-16	22	Edil3
3.5754e-20	0.393632	0.712	0.559	9.22561e-16	22	Pou2f1
3.66187e-20	0.397789	0.384	0.175	9.44874e-16	22	Dclk2
4.09278e-20	0.410301	0.253	0.087	1.05606e-15	22	Bcl11a
4.14188e-20	0.295811	0.253	0.084	1.06873e-15	22	Gm3788
7.54965e-20	0.46	0.856	0.653	1.94804e-15	22	Map2
8.53818e-20	0.375997	0.24	0.079	2.20311e-15	22	Abracl
1.09989e-19	0.398723	0.432	0.215	2.83805e-15	22	Tmem132b
1.24261e-19	0.294164	0.452	0.228	3.20631e-15	22	4833420G17Rik
1.52089e-19	0.419376	0.935	0.839	3.92434e-15	22	Zeb2
3.0705e-19	0.291893	0.212	0.064	7.92282e-15	22	Ppfia2
4.63024e-19	0.399725	0.521	0.314	1.19474e-14	22	Epha4
6.87086e-19	0.56418	0.904	0.778	1.77289e-14	22	Ccnd2
2.24939e-18	0.341514	0.404	0.195	5.80409e-14	22	A830082K12Rik
2.38161e-18	0.398125	0.312	0.131	6.14527e-14	22	Dpysl3
2.39239e-18	0.32617	0.962	0.953	6.17309e-14	22	Gpm6a
3.50471e-18	0.634551	0.846	0.602	9.04319e-14	22	Sox4
4.0551e-18	0.325682	0.99	0.953	1.04634e-13	22	Celf2
4.31179e-18	0.293081	0.195	0.058	1.11257e-13	22	Dlx1
5.47073e-18	0.368206	0.983	0.934	1.41161e-13	22	Dlgap1
7.19224e-18	0.421795	0.634	0.414	1.85581e-13	22	Garnl3
7.51815e-18	0.373451	0.753	0.601	1.93991e-13	22	Akt3
8.66622e-18	0.480505	0.733	0.574	2.23614e-13	22	Epha5
1.64817e-17	0.31274	0.113	0.021	4.25277e-13	22	Synpr
1.83587e-17	0.265749	0.158	0.04	4.7371e-13	22	Myt1l
1.85246e-17	0.357648	0.199	0.063	4.77991e-13	22	Cacna1c
1.96514e-17	0.353264	0.682	0.465	5.07065e-13	22	Tcf12
2.47994e-17	0.41856	0.25	0.09	6.39898e-13	22	Tnfaip6
3.66578e-17	0.457004	0.216	0.074	9.4588e-13	22	Dcx
5.67406e-17	0.364886	0.534	0.314	1.46408e-12	22	Rlbp1
1.66616e-16	0.332496	0.13	0.03	4.29921e-12	22	Gria4
2.30035e-16	0.363753	0.712	0.568	5.93558e-12	22	Nedd4l
4.31488e-16	0.318757	0.808	0.725	1.11337e-11	22	Pou3f2
4.53546e-16	0.748042	0.257	0.104	1.17028e-11	22	Lrrc7
6.09333e-16	0.265526	0.308	0.137	1.57226e-11	22	Gm26804
6.686e-16	0.378728	0.253	0.101	1.72519e-11	22	Cadps
8.60295e-16	0.35893	0.589	0.417	2.21982e-11	22	Kat6b
1.1887e-15	0.727409	0.949	0.852	3.06721e-11	22	Tubb5
1.43441e-15	0.275246	0.459	0.242	3.7012e-11	22	Cd24a
2.23475e-15	0.316438	0.716	0.522	5.76632e-11	22	Hnrnpab
2.36314e-15	0.369466	0.38	0.199	6.0976e-11	22	Gria2
2.3724e-15	0.359638	0.784	0.556	6.1215e-11	22	Hn1
3.32212e-15	0.328106	0.918	0.807	8.57206e-11	22	Sox6
3.69088e-15	0.311576	0.305	0.139	9.52359e-11	22	Csmd2
5.9454e-15	0.447415	0.26	0.11	1.53409e-10	22	2610307P16Rik
6.04611e-15	0.793072	0.257	0.107	1.56008e-10	22	Adarb2
6.65032e-15	0.305101	0.839	0.695	1.71598e-10	22	Tmcc1
8.45726e-15	0.279119	0.812	0.631	2.18223e-10	22	Kansl1
1.25008e-14	0.325841	0.37	0.194	3.22558e-10	22	Mllt3
1.8715e-14	0.358318	0.387	0.209	4.82904e-10	22	Nr2f1
2.03618e-14	0.418612	0.682	0.479	5.25395e-10	22	Tiam2
2.39647e-14	0.415221	0.271	0.119	6.1836e-10	22	Kcnh7
3.61288e-14	0.299639	0.983	0.967	9.32232e-10	22	Nlgn1
3.9521e-14	0.492539	0.401	0.24	1.01976e-09	22	Nlk
6.77216e-14	0.307549	0.866	0.744	1.74742e-09	22	Ttc3
9.05666e-14	0.35139	0.839	0.774	2.33689e-09	22	Nckap5
1.16846e-13	0.304073	0.438	0.251	3.01499e-09	22	Pak3
1.76016e-13	0.490318	0.473	0.288	4.54174e-09	22	Zfp704
2.06557e-13	0.265348	0.322	0.16	5.3298e-09	22	Tagln3
2.2111e-13	0.376432	0.507	0.353	5.7053e-09	22	Dip2c
2.21891e-13	0.290811	0.767	0.627	5.72546e-09	22	Map4k4
2.27676e-13	0.312701	0.445	0.272	5.87472e-09	22	Rnf180
2.30889e-13	0.303771	0.301	0.141	5.95763e-09	22	RP24-165I13.1
3.2679e-13	0.29835	0.74	0.591	8.43216e-09	22	App
4.1248e-13	0.25138	0.877	0.731	1.06432e-08	22	Gsk3b
4.83265e-13	0.290221	0.325	0.165	1.24697e-08	22	Gm28175
6.23232e-13	0.256171	0.298	0.144	1.60812e-08	22	Gm11266
6.55288e-13	0.366807	0.541	0.376	1.69084e-08	22	Cdk14
7.90394e-13	0.357924	0.788	0.633	2.03945e-08	22	Hnrnpa1
8.07987e-13	0.349967	0.558	0.431	2.08485e-08	22	Astn1
1.57375e-12	0.317212	0.5	0.332	4.06075e-08	22	Zc3h13
1.6922e-12	0.3071	0.976	0.901	4.36638e-08	22	Magi2
1.92165e-12	0.293892	0.815	0.715	4.95843e-08	22	Cdh2
3.17906e-12	0.292447	0.654	0.533	8.20292e-08	22	Ptprs
3.62774e-12	0.275949	0.836	0.751	9.36066e-08	22	Mdk
4.89137e-12	0.455263	0.575	0.375	1.26212e-07	22	Map1b
5.45937e-12	0.322034	0.709	0.575	1.40868e-07	22	Wdr17
5.60221e-12	0.305023	0.808	0.721	1.44554e-07	22	2610203C20Rik
6.96474e-12	0.288293	0.664	0.541	1.79711e-07	22	Zmiz1
7.15501e-12	0.615078	0.781	0.573	1.84621e-07	22	Sox11
7.52671e-12	0.257994	1	0.999	1.94212e-07	22	H3f3a
8.31324e-12	0.360155	0.589	0.436	2.14507e-07	22	Lama2
8.32151e-12	0.258024	0.723	0.596	2.1472e-07	22	Gpatch8
9.94903e-12	0.293116	0.353	0.188	2.56715e-07	22	Elavl3
1.0157e-11	0.262315	0.788	0.668	2.6208e-07	22	Stag1
1.17272e-11	0.333663	0.37	0.216	3.02597e-07	22	Pkia
1.47737e-11	0.313639	0.572	0.392	3.81206e-07	22	Tnc
2.00638e-11	0.255726	0.938	0.858	5.17706e-07	22	B3galt1
2.14745e-11	0.349924	0.784	0.721	5.54106e-07	22	Tox
2.48212e-11	0.293357	0.914	0.85	6.4046e-07	22	Negr1
2.59161e-11	0.316054	0.531	0.386	6.68713e-07	22	Arid1b
3.95689e-11	0.355572	0.476	0.337	1.021e-06	22	Chd7
4.2019e-11	0.290959	0.507	0.353	1.08422e-06	22	Cttnbp2
4.93366e-11	0.301474	0.551	0.416	1.27303e-06	22	Srgap2
5.40612e-11	0.280195	0.736	0.608	1.39494e-06	22	Dmd
6.1229e-11	0.257774	0.613	0.488	1.57989e-06	22	Sncaip
7.10992e-11	0.262275	0.932	0.883	1.83457e-06	22	Marcks
7.9844e-11	0.299275	0.514	0.375	2.06021e-06	22	Rif1
1.07547e-10	0.32038	0.901	0.87	2.77503e-06	22	Fars2
1.12954e-10	0.250911	0.394	0.237	2.91456e-06	22	Prelid3a
1.3173e-10	0.321828	0.678	0.556	3.39904e-06	22	Slc35f1
1.60633e-10	0.263622	0.952	0.925	4.14481e-06	22	Rtn1
1.93196e-10	0.281295	0.192	0.081	4.98503e-06	22	Foxp2
2.05908e-10	0.26755	0.24	0.115	5.31305e-06	22	Aff3
2.3267e-10	0.256251	0.668	0.539	6.00358e-06	22	Fam172a
2.3652e-10	0.266797	0.555	0.378	6.10292e-06	22	Fxyd6
2.94149e-10	0.272857	0.839	0.786	7.58992e-06	22	Kcnn2
4.81659e-10	0.362475	0.842	0.702	1.24282e-05	22	Ppp1r14b
4.96377e-10	0.2635	0.592	0.469	1.2808e-05	22	Ptpn4
5.13912e-10	0.291938	0.503	0.368	1.32605e-05	22	Sesn1
5.29277e-10	0.269403	0.442	0.295	1.36569e-05	22	Rasa1
6.25574e-10	0.27793	0.195	0.085	1.61417e-05	22	Unc5d
6.6646e-10	0.268153	0.548	0.417	1.71967e-05	22	Zfp292
7.42247e-10	0.298829	0.192	0.083	1.91522e-05	22	Grip1
8.03886e-10	0.257037	0.38	0.231	2.07427e-05	22	Shroom3
8.41411e-10	0.300125	0.175	0.074	2.17109e-05	22	Slc8a1
1.48484e-09	0.256799	0.654	0.552	3.83134e-05	22	Gm3764
2.16661e-09	0.397564	0.675	0.536	5.59049e-05	22	Xist
2.46907e-09	0.733696	0.887	0.748	6.37094e-05	22	Stmn1
2.59444e-09	0.278141	0.158	0.065	6.69443e-05	22	Lrrtm4
2.70952e-09	0.26005	0.692	0.543	6.99138e-05	22	Thrsp
3.14496e-09	0.275834	0.699	0.618	8.11494e-05	22	Notch2
3.674e-09	0.506925	0.644	0.439	9.48003e-05	22	Basp1
4.96779e-09	0.269964	0.5	0.377	0.000128184	22	Pan3
5.59443e-09	0.256696	0.432	0.304	0.000144353	22	Hdgfrp3
6.02003e-09	0.253473	0.832	0.76	0.000155335	22	Adk
6.85469e-09	0.388197	0.729	0.661	0.000176871	22	Eda
6.92832e-09	0.252003	0.493	0.35	0.000178772	22	Dgki
8.4271e-09	0.256814	0.315	0.188	0.000217444	22	Gng3
8.66008e-09	0.340796	0.729	0.639	0.000223456	22	Adgrb3
9.76167e-09	0.360798	0.305	0.188	0.00025188	22	Maml3
1.81889e-08	0.30022	0.545	0.431	0.000469327	22	Tom1l2
1.875e-08	0.342471	0.202	0.098	0.000483805	22	Hist1h2ap
2.13709e-08	0.270836	0.503	0.388	0.000551434	22	Ptbp2
2.99495e-08	0.45219	0.349	0.235	0.000772788	22	Enox1
3.1631e-08	0.267076	0.562	0.465	0.000816175	22	Spire1
3.44234e-08	0.410952	0.729	0.662	0.000888228	22	Gpc5
4.2121e-08	0.252316	0.63	0.541	0.00108685	22	Hivep3
4.73867e-08	0.280012	0.377	0.257	0.00122272	22	Cask
6.08159e-08	0.270913	0.425	0.278	0.00156923	22	Cmya5
7.50747e-08	0.259603	0.308	0.196	0.00193715	22	Fam110b
7.88208e-08	0.265383	0.897	0.809	0.00203381	22	Hmgn2
8.84263e-08	0.28681	0.582	0.483	0.00228166	22	Sema6d
9.57802e-08	0.265019	0.449	0.341	0.00247142	22	Pou3f4
1.17982e-07	0.317264	0.562	0.475	0.00304429	22	Psd3
1.53795e-07	0.432866	0.949	0.933	0.00396837	22	Sltm
2.16285e-07	0.293046	0.675	0.578	0.00558079	22	Tnfrsf19
2.20993e-07	0.268104	0.966	0.901	0.00570228	22	H2afz
3.21211e-07	0.274794	0.634	0.562	0.00828821	22	Fgf13
5.55937e-07	0.349248	0.901	0.837	0.0143449	22	Pfn2
5.80507e-07	0.27328	0.401	0.291	0.0149788	22	Eml5
7.51258e-07	0.294064	0.791	0.717	0.0193847	22	Sfrp1
8.17705e-07	0.250906	0.404	0.303	0.0210992	22	Itch
1.16801e-06	0.321635	0.147	0.071	0.0301382	22	Shtn1
1.38285e-06	0.250168	0.545	0.459	0.0356818	22	Scaper
1.80484e-06	0.545934	0.449	0.374	0.0465702	22	Robo2

## Sheet: Sheet3
go	ref	obs	expected	pos.neg	fold.enrich	raw.p.value	fdr
posterior midgut development (GO:0007497)	1	1	0.01	+	> 100	0.0101	0.402
coronal suture morphogenesis (GO:0060365)	1	1	0.01	+	> 100	0.0101	0.401
regulation of adenylate cyclase-inhibiting adrenergic receptor signaling pathway (GO:0071877)	1	1	0.01	+	> 100	0.0101	0.4
midbrain-hindbrain boundary initiation (GO:0021547)	1	1	0.01	+	> 100	0.0101	0.399
prechordal plate formation (GO:0021501)	1	1	0.01	+	> 100	0.0101	0.398
positive regulation of Rho guanyl-nucleotide exchange factor activity (GO:2001108)	1	1	0.01	+	> 100	0.0101	0.397
vestibular receptor cell stereocilium organization (GO:0060121)	1	1	0.01	+	> 100	0.0101	0.396
FasL biosynthetic process (GO:0045210)	1	1	0.01	+	> 100	0.0101	0.395
positive regulation of mast cell activation by Fc-epsilon receptor signaling pathway (GO:0038097)	1	1	0.01	+	> 100	0.0101	0.394
positive regulation of invadopodium disassembly (GO:1905929)	1	1	0.01	+	> 100	0.0101	0.393
regulation of invadopodium disassembly (GO:1905927)	1	1	0.01	+	> 100	0.0101	0.392
response to benomyl (GO:1901561)	1	1	0.01	+	> 100	0.0101	0.391
negative regulation of adenylate cyclase-inhibiting adrenergic receptor signaling pathway involved in heart process (GO:0140194)	1	1	0.01	+	> 100	0.0101	0.39
regulation of adenylate cyclase-inhibiting adrenergic receptor signaling pathway involved in heart process (GO:0140193)	1	1	0.01	+	> 100	0.0101	0.389
negative regulation of cellular response to tunicamycin (GO:1905895)	1	1	0.01	+	> 100	0.0101	0.388
negative regulation of cellular response to thapsigargin (GO:1905892)	1	1	0.01	+	> 100	0.0101	0.387
negative regulation of exit from mitosis (GO:0001100)	1	1	0.01	+	> 100	0.0101	0.386
trehalose metabolism in response to stress (GO:0070413)	1	1	0.01	+	> 100	0.0101	0.385
regulation of translational initiation by eIF2 alpha dephosphorylation (GO:0036496)	1	1	0.01	+	> 100	0.0101	0.385
sensory neuron migration (GO:1904937)	1	1	0.01	+	> 100	0.0101	0.384
positive regulation of glutamatergic neuron differentiation (GO:0120008)	1	1	0.01	+	> 100	0.0101	0.383
regulation of glutamatergic neuron differentiation (GO:0120006)	1	1	0.01	+	> 100	0.0101	0.382
pyruvate oxidation (GO:0009444)	1	1	0.01	+	> 100	0.0101	0.381
de novo' actin filament nucleation (GO:0070060)	1	1	0.01	+	> 100	0.0101	0.38
enteric smooth muscle cell differentiation (GO:0035645)	1	1	0.01	+	> 100	0.0101	0.379
fibroblast growth factor receptor signaling pathway involved in positive regulation of cell proliferation in bone marrow (GO:0035604)	1	1	0.01	+	> 100	0.0101	0.378
fibroblast growth factor receptor signaling pathway involved in hemopoiesis (GO:0035603)	1	1	0.01	+	> 100	0.0101	0.377
fibroblast growth factor receptor signaling pathway involved in negative regulation of apoptotic process in bone marrow cell (GO:0035602)	1	1	0.01	+	> 100	0.0101	0.376
positive regulation of guanyl-nucleotide exchange factor activity (GO:1905099)	1	1	0.01	+	> 100	0.0101	0.375
positive regulation of Ras GTPase binding (GO:1904477)	1	1	0.01	+	> 100	0.0101	0.375
positive regulation of endoplasmic reticulum stress-induced eIF2 alpha dephosphorylation (GO:1903917)	1	1	0.01	+	> 100	0.0101	0.374
regulation of endoplasmic reticulum stress-induced eIF2 alpha dephosphorylation (GO:1903916)	1	1	0.01	+	> 100	0.0101	0.373
regulation of plasma membrane raft polarization (GO:1903906)	1	1	0.01	+	> 100	0.0101	0.372
negative regulation of skeletal muscle hypertrophy (GO:1904205)	1	1	0.01	+	> 100	0.0101	0.371
positive regulation of Schwann cell proliferation (GO:0010625)	1	1	0.01	+	> 100	0.0101	0.37
cellular response to benomyl (GO:0072755)	1	1	0.01	+	> 100	0.0101	0.369
pancreatic A cell development (GO:0003322)	1	1	0.01	+	> 100	0.0101	0.369
mesenchymal-epithelial cell signaling involved in prostate gland development (GO:0060739)	1	1	0.01	+	> 100	0.0101	0.368
plasma lipoprotein particle oxidation (GO:0034441)	1	1	0.01	+	> 100	0.0101	0.367
regulation of transcription from RNA polymerase II promoter involved in somatic motor neuron fate commitment (GO:0021918)	1	1	0.01	+	> 100	0.0101	0.366
somatic motor neuron fate commitment (GO:0021917)	1	1	0.01	+	> 100	0.0101	0.365
forebrain-midbrain boundary formation (GO:0021905)	1	1	0.01	+	> 100	0.0101	0.364
renal protein absorption (GO:0097017)	1	1	0.01	+	> 100	0.0101	0.363
regulation of neuronal signal transduction (GO:1902847)	1	1	0.01	+	> 100	0.0101	0.363
epithalamus development (GO:0021538)	3	2	0.02	+	> 100	0.000252	0.0272
habenula development (GO:0021986)	3	2	0.02	+	> 100	0.000252	0.0271
orbitofrontal cortex development (GO:0021769)	2	1	0.01	+	98.16	0.0151	0.467
globus pallidus development (GO:0021759)	2	1	0.01	+	98.16	0.0151	0.466
regulation of systemic arterial blood pressure by atrial natriuretic peptide (GO:0003050)	2	1	0.01	+	98.16	0.0151	0.465
granuloma formation (GO:0002432)	2	1	0.01	+	98.16	0.0151	0.465
positive regulation of anterior head development (GO:2000744)	2	1	0.01	+	98.16	0.0151	0.464
regulation of anterior head development (GO:2000742)	2	1	0.01	+	98.16	0.0151	0.463
subpallium neuron fate commitment (GO:0060163)	2	1	0.01	+	98.16	0.0151	0.462
vestibular receptor cell morphogenesis (GO:0060116)	2	1	0.01	+	98.16	0.0151	0.461
positive regulation of peptidyl-serine dephosphorylation (GO:1902310)	2	1	0.01	+	98.16	0.0151	0.46
endothelial cell-matrix adhesion (GO:0090673)	2	1	0.01	+	98.16	0.0151	0.459
positive regulation of mast cell cytokine production (GO:0032765)	2	1	0.01	+	98.16	0.0151	0.458
general adaptation syndrome (GO:0051866)	2	1	0.01	+	98.16	0.0151	0.457
trehalose metabolic process (GO:0005991)	2	1	0.01	+	98.16	0.0151	0.457
cellular response to corticotropin-releasing hormone stimulus (GO:0071376)	4	2	0.02	+	98.16	0.000377	0.0372
positive regulation of presynaptic membrane organization (GO:1901631)	2	1	0.01	+	98.16	0.0151	0.456
positive regulation of translational initiation in response to starvation (GO:0071264)	2	1	0.01	+	98.16	0.0151	0.455
regulation of translational initiation in response to starvation (GO:0071262)	2	1	0.01	+	98.16	0.0151	0.454
ether catabolic process (GO:1901502)	2	1	0.01	+	98.16	0.0151	0.453
trans-synaptic signaling by neuropeptide, modulating synaptic transmission (GO:0099551)	2	1	0.01	+	98.16	0.0151	0.452
trans-synaptic signaling by neuropeptide (GO:0099540)	2	1	0.01	+	98.16	0.0151	0.451
synaptic signaling via neuropeptide (GO:0099538)	2	1	0.01	+	98.16	0.0151	0.45
regulation of cellular response to tunicamycin (GO:1905894)	2	1	0.01	+	98.16	0.0151	0.45
regulation of cellular response to thapsigargin (GO:1905891)	2	1	0.01	+	98.16	0.0151	0.449
negative regulation of glycine import across plasma membrane (GO:1900924)	2	1	0.01	+	98.16	0.0151	0.448
detection of mechanical stimulus involved in equilibrioception (GO:0050973)	2	1	0.01	+	98.16	0.0151	0.447
glycerol ether catabolic process (GO:0044269)	2	1	0.01	+	98.16	0.0151	0.446
trimming of terminal mannose on B branch (GO:0036509)	2	1	0.01	+	98.16	0.0151	0.445
mRNA 3'-splice site recognition (GO:0000389)	2	1	0.01	+	98.16	0.0151	0.445
generation of catalytic spliceosome for second transesterification step (GO:0000350)	2	1	0.01	+	98.16	0.0151	0.444
response to corticotropin-releasing hormone (GO:0043435)	4	2	0.02	+	98.16	0.000377	0.0369
fibroblast growth factor receptor signaling pathway involved in orbitofrontal cortex development (GO:0035607)	2	1	0.01	+	98.16	0.0151	0.443
circadian sleep/wake cycle, non-REM sleep (GO:0042748)	2	1	0.01	+	98.16	0.0151	0.442
platelet activating factor catabolic process (GO:0062234)	2	1	0.01	+	98.16	0.0151	0.441
positive regulation of protein processing in phagocytic vesicle (GO:1903923)	2	1	0.01	+	98.16	0.0151	0.441
regulation of protein processing in phagocytic vesicle (GO:1903921)	2	1	0.01	+	98.16	0.0151	0.44
thyroid hormone catabolic process (GO:0042404)	2	1	0.01	+	98.16	0.0151	0.439
mesenchymal cell differentiation involved in lung development (GO:0060915)	2	1	0.01	+	98.16	0.0151	0.438
regulation of endoplasmic reticulum stress-induced eIF2 alpha phosphorylation (GO:0060734)	2	1	0.01	+	98.16	0.0151	0.437
regulation of eIF2 alpha phosphorylation by amino acid starvation (GO:0060733)	2	1	0.01	+	98.16	0.0151	0.436
fasciculation of motor neuron axon (GO:0097156)	2	1	0.01	+	98.16	0.0151	0.436
positive regulation of neurofibrillary tangle assembly (GO:1902998)	2	1	0.01	+	98.16	0.0151	0.435
branch elongation involved in salivary gland morphogenesis (GO:0060667)	2	1	0.01	+	98.16	0.0151	0.434
mammary gland bud formation (GO:0060615)	2	1	0.01	+	98.16	0.0151	0.433
chemorepulsion involved in interneuron migration from the subpallium to the cortex (GO:0021842)	2	1	0.01	+	98.16	0.0151	0.433
directional guidance of interneurons involved in migration from the subpallium to the cortex (GO:0021840)	2	1	0.01	+	98.16	0.0151	0.432
embryonic olfactory bulb interneuron precursor migration (GO:0021831)	2	1	0.01	+	98.16	0.0151	0.431
fibroblast growth factor receptor signaling pathway involved in mammary gland specification (GO:0060595)	2	1	0.01	+	98.16	0.0151	0.43
squamous basal epithelial stem cell differentiation involved in prostate gland acinus development (GO:0060529)	2	1	0.01	+	98.16	0.0151	0.429
negative regulation of pro-B cell differentiation (GO:2000974)	3	1	0.02	+	65.44	0.0201	0.516
immune complex clearance (GO:0002434)	3	1	0.02	+	65.44	0.0201	0.515
rhombomere morphogenesis (GO:0021593)	3	1	0.02	+	65.44	0.0201	0.515
isopentenyl diphosphate biosynthetic process, mevalonate pathway (GO:0019287)	3	1	0.02	+	65.44	0.0201	0.514
intestinal D-glucose absorption (GO:0001951)	3	1	0.02	+	65.44	0.0201	0.513
vestibular receptor cell development (GO:0060118)	3	1	0.02	+	65.44	0.0201	0.512
vestibular receptor cell differentiation (GO:0060114)	3	1	0.02	+	65.44	0.0201	0.511
endothelial cell-cell adhesion (GO:0071603)	3	1	0.02	+	65.44	0.0201	0.511
C-terminal protein methylation (GO:0006481)	3	1	0.02	+	65.44	0.0201	0.51
peripheral nervous system axon regeneration (GO:0014012)	3	1	0.02	+	65.44	0.0201	0.509
positive regulation of DNA topoisomerase (ATP-hydrolyzing) activity (GO:2000373)	3	1	0.02	+	65.44	0.0201	0.508
regulation of DNA topoisomerase (ATP-hydrolyzing) activity (GO:2000371)	3	1	0.02	+	65.44	0.0201	0.507
positive regulation of keratinocyte apoptotic process (GO:1902174)	3	1	0.02	+	65.44	0.0201	0.506
regulation of presynaptic membrane organization (GO:1901629)	3	1	0.02	+	65.44	0.0201	0.506
rRNA 5'-end processing (GO:0000967)	3	1	0.02	+	65.44	0.0201	0.505
positive regulation of sodium-dependent phosphate transport (GO:2000120)	3	1	0.02	+	65.44	0.0201	0.504
regulation of glycine import across plasma membrane (GO:1900923)	3	1	0.02	+	65.44	0.0201	0.503
regulation of odontoblast differentiation (GO:1901329)	3	1	0.02	+	65.44	0.0201	0.502
intestinal hexose absorption (GO:0106001)	3	1	0.02	+	65.44	0.0201	0.502
thyroid-stimulating hormone secretion (GO:0070460)	3	1	0.02	+	65.44	0.0201	0.501
circadian sleep/wake cycle, sleep (GO:0050802)	3	1	0.02	+	65.44	0.0201	0.5
positive regulation of translational initiation in response to stress (GO:0032058)	3	1	0.02	+	65.44	0.0201	0.499
positive regulation of monocyte aggregation (GO:1900625)	3	1	0.02	+	65.44	0.0201	0.498
regulation of monocyte aggregation (GO:1900623)	3	1	0.02	+	65.44	0.0201	0.498
endonucleolytic cleavage to generate mature 5'-end of SSU-rRNA from (SSU-rRNA, 5.8S rRNA, LSU-rRNA) (GO:0000472)	3	1	0.02	+	65.44	0.0201	0.497
wybutosine biosynthetic process (GO:0031591)	3	1	0.02	+	65.44	0.0201	0.496
wybutosine metabolic process (GO:0031590)	3	1	0.02	+	65.44	0.0201	0.495
regulation of translational initiation in response to stress (GO:0043558)	6	2	0.03	+	65.44	0.000699	0.0613
negative regulation of lymphoid progenitor cell differentiation (GO:1905457)	3	1	0.02	+	65.44	0.0201	0.495
T-helper 1 cell activation (GO:0035711)	3	1	0.02	+	65.44	0.0201	0.494
peptidoglycan transport (GO:0015835)	3	1	0.02	+	65.44	0.0201	0.493
membrane depolarization during bundle of His cell action potential (GO:0086048)	3	1	0.02	+	65.44	0.0201	0.492
endoplasmic reticulum mannose trimming (GO:1904380)	3	1	0.02	+	65.44	0.0201	0.492
calcium ion transmembrane transport via high voltage-gated calcium channel (GO:0061577)	3	1	0.02	+	65.44	0.0201	0.491
regulation of skeletal muscle hypertrophy (GO:1904204)	3	1	0.02	+	65.44	0.0201	0.49
positive regulation of viral budding via host ESCRT complex (GO:1903774)	3	1	0.02	+	65.44	0.0201	0.489
mesenchymal cell proliferation involved in lung development (GO:0060916)	3	1	0.02	+	65.44	0.0201	0.489
positive regulation of extracellular matrix constituent secretion (GO:0003331)	3	1	0.02	+	65.44	0.0201	0.488
fasciculation of sensory neuron axon (GO:0097155)	3	1	0.02	+	65.44	0.0201	0.487
neural plate anterior/posterior regionalization (GO:0021999)	3	1	0.02	+	65.44	0.0201	0.486
spinal cord ventral commissure morphogenesis (GO:0021965)	3	1	0.02	+	65.44	0.0201	0.486
regulation of transcription from RNA polymerase II promoter involved in spinal cord motor neuron fate specification (GO:0021912)	3	1	0.02	+	65.44	0.0201	0.485
regulation of neurofibrillary tangle assembly (GO:1902996)	3	1	0.02	+	65.44	0.0201	0.484
olfactory bulb mitral cell layer development (GO:0061034)	3	1	0.02	+	65.44	0.0201	0.483
ventricular zone neuroblast division (GO:0021847)	3	1	0.02	+	65.44	0.0201	0.483
terminal web assembly (GO:1902896)	3	1	0.02	+	65.44	0.0201	0.482
prostate epithelial cord elongation (GO:0060523)	3	1	0.02	+	65.44	0.0201	0.481
forebrain dorsal/ventral pattern formation (GO:0021798)	7	2	0.04	+	56.09	0.000895	0.0744
lacrimal gland development (GO:0032808)	7	2	0.04	+	56.09	0.000895	0.074
negative regulation of inner ear receptor cell differentiation (GO:2000981)	4	1	0.02	+	49.08	0.0251	0.563
negative regulation of forebrain neuron differentiation (GO:2000978)	4	1	0.02	+	49.08	0.0251	0.562
bud outgrowth involved in lung branching (GO:0060447)	4	1	0.02	+	49.08	0.0251	0.562
negative regulation of mechanoreceptor differentiation (GO:0045632)	4	1	0.02	+	49.08	0.0251	0.561
negative regulation of inner ear auditory receptor cell differentiation (GO:0045608)	4	1	0.02	+	49.08	0.0251	0.56
dorsal/ventral axon guidance (GO:0033563)	4	1	0.02	+	49.08	0.0251	0.559
phosphatidylserine biosynthetic process (GO:0006659)	4	1	0.02	+	49.08	0.0251	0.558
specification of loop of Henle identity (GO:0072086)	4	1	0.02	+	49.08	0.0251	0.558
response to endothelin (GO:1990839)	4	1	0.02	+	49.08	0.0251	0.557
neurotransmitter receptor metabolic process (GO:0045213)	4	1	0.02	+	49.08	0.0251	0.556
Fc-epsilon receptor signaling pathway (GO:0038095)	4	1	0.02	+	49.08	0.0251	0.555
regulation of mast cell cytokine production (GO:0032763)	4	1	0.02	+	49.08	0.0251	0.555
negative regulation of neuron maturation (GO:0014043)	4	1	0.02	+	49.08	0.0251	0.554
clustering of voltage-gated potassium channels (GO:0045163)	4	1	0.02	+	49.08	0.0251	0.553
central nervous system myelin maintenance (GO:0032286)	4	1	0.02	+	49.08	0.0251	0.552
protein alpha-1,2-demannosylation (GO:0036508)	4	1	0.02	+	49.08	0.0251	0.551
protein demannosylation (GO:0036507)	4	1	0.02	+	49.08	0.0251	0.551
actin polymerization-dependent cell motility (GO:0070358)	4	1	0.02	+	49.08	0.0251	0.55
trans-synaptic signaling by BDNF (GO:0099191)	4	1	0.02	+	49.08	0.0251	0.549
trans-synaptic signaling by BDNF, modulating synaptic transmission (GO:0099183)	4	1	0.02	+	49.08	0.0251	0.548
protein deglycosylation involved in glycoprotein catabolic process (GO:0035977)	4	1	0.02	+	49.08	0.0251	0.548
regulation of chaperone-mediated autophagy (GO:1904714)	4	1	0.02	+	49.08	0.0251	0.547
positive regulation of cell fate specification (GO:0042660)	4	1	0.02	+	49.08	0.0251	0.546
positive regulation of GTP binding (GO:1904426)	4	1	0.02	+	49.08	0.0251	0.545
regulation of establishment of T cell polarity (GO:1903903)	4	1	0.02	+	49.08	0.0251	0.545
positive regulation of skeletal muscle acetylcholine-gated channel clustering (GO:1904395)	4	1	0.02	+	49.08	0.0251	0.544
mannose trimming involved in glycoprotein ERAD pathway (GO:1904382)	4	1	0.02	+	49.08	0.0251	0.543
regulation of viral budding via host ESCRT complex (GO:1903772)	4	1	0.02	+	49.08	0.0251	0.542
neural plate regionalization (GO:0060897)	4	1	0.02	+	49.08	0.0251	0.542
prostate gland morphogenetic growth (GO:0060737)	4	1	0.02	+	49.08	0.0251	0.541
striated muscle atrophy (GO:0014891)	4	1	0.02	+	49.08	0.0251	0.54
vein smooth muscle contraction (GO:0014826)	4	1	0.02	+	49.08	0.0251	0.539
circadian sleep/wake cycle process (GO:0022410)	4	1	0.02	+	49.08	0.0251	0.539
regulation of transcription from RNA polymerase II promoter involved in ventral spinal cord interneuron specification (GO:0021913)	4	1	0.02	+	49.08	0.0251	0.538
mammary gland bud morphogenesis (GO:0060648)	4	1	0.02	+	49.08	0.0251	0.537
endodermal digestive tract morphogenesis (GO:0061031)	4	1	0.02	+	49.08	0.0251	0.536
mammary gland specification (GO:0060594)	4	1	0.02	+	49.08	0.0251	0.536
interneuron migration from the subpallium to the cortex (GO:0021830)	9	2	0.05	+	43.63	0.00136	0.0975
response to lead ion (GO:0010288)	10	2	0.05	+	39.26	0.00163	0.113
glial cell fate commitment (GO:0021781)	15	3	0.08	+	39.26	9.78e-05	0.0129
glial cell fate specification (GO:0021780)	5	1	0.03	+	39.26	0.03	0.621
oligodendrocyte cell fate commitment (GO:0021779)	5	1	0.03	+	39.26	0.03	0.62
oligodendrocyte cell fate specification (GO:0021778)	5	1	0.03	+	39.26	0.03	0.62
midgut development (GO:0007494)	5	1	0.03	+	39.26	0.03	0.619
melanosome assembly (GO:1903232)	5	1	0.03	+	39.26	0.03	0.618
positive regulation of melanocyte differentiation (GO:0045636)	5	1	0.03	+	39.26	0.03	0.617
protein localization to adherens junction (GO:0071896)	5	1	0.03	+	39.26	0.03	0.616
anterior/posterior axon guidance (GO:0033564)	5	1	0.03	+	39.26	0.03	0.615
regulation of Rho guanyl-nucleotide exchange factor activity (GO:2001106)	5	1	0.03	+	39.26	0.03	0.615
activation of transmembrane receptor protein tyrosine kinase activity (GO:0007171)	5	1	0.03	+	39.26	0.03	0.614
specification of nephron tubule identity (GO:0072081)	5	1	0.03	+	39.26	0.03	0.613
comma-shaped body morphogenesis (GO:0072049)	5	1	0.03	+	39.26	0.03	0.612
proximal/distal pattern formation involved in nephron development (GO:0072047)	5	1	0.03	+	39.26	0.03	0.612
vestibular reflex (GO:0060005)	5	1	0.03	+	39.26	0.03	0.611
regulation of peptidyl-serine dephosphorylation (GO:1902308)	5	1	0.03	+	39.26	0.03	0.61
positive regulation of high voltage-gated calcium channel activity (GO:1901843)	5	1	0.03	+	39.26	0.03	0.609
positive regulation of glycogen (starch) synthase activity (GO:2000467)	5	1	0.03	+	39.26	0.03	0.608
positive regulation of protein neddylation (GO:2000436)	5	1	0.03	+	39.26	0.03	0.608
inhibition of neuroepithelial cell differentiation (GO:0002085)	5	1	0.03	+	39.26	0.03	0.607
positive regulation of glucocorticoid receptor signaling pathway (GO:2000324)	5	1	0.03	+	39.26	0.03	0.606
negative regulation of synaptic vesicle exocytosis (GO:2000301)	5	1	0.03	+	39.26	0.03	0.605
dipeptide import across plasma membrane (GO:0140206)	5	1	0.03	+	39.26	0.03	0.605
oligopeptide import across plasma membrane (GO:0140205)	5	1	0.03	+	39.26	0.03	0.604
protein localization to juxtaparanode region of axon (GO:0071205)	5	1	0.03	+	39.26	0.03	0.603
negative regulation of amyloid fibril formation (GO:1905907)	5	1	0.03	+	39.26	0.03	0.602
regulation of sodium-dependent phosphate transport (GO:2000118)	5	1	0.03	+	39.26	0.03	0.601
negative regulation of transcription from RNA polymerase II promoter in response to endoplasmic reticulum stress (GO:1990441)	5	1	0.03	+	39.26	0.03	0.601
cellular response to brain-derived neurotrophic factor stimulus (GO:1990416)	5	1	0.03	+	39.26	0.03	0.6
negative regulation of fibroblast growth factor production (GO:0090272)	5	1	0.03	+	39.26	0.03	0.599
branching morphogenesis of a nerve (GO:0048755)	5	1	0.03	+	39.26	0.03	0.598
synaptic growth at neuromuscular junction (GO:0051124)	5	1	0.03	+	39.26	0.03	0.598
brain-derived neurotrophic factor receptor signaling pathway (GO:0031547)	5	1	0.03	+	39.26	0.03	0.597
spliceosomal conformational changes to generate catalytic conformation (GO:0000393)	5	1	0.03	+	39.26	0.03	0.596
learned vocalization behavior or vocal learning (GO:0098598)	10	2	0.05	+	39.26	0.00163	0.112
positive regulation of skeletal muscle tissue regeneration (GO:0043415)	5	1	0.03	+	39.26	0.03	0.595
dipeptide transport (GO:0042938)	5	1	0.03	+	39.26	0.03	0.595
response to insecticide (GO:0017085)	5	1	0.03	+	39.26	0.03	0.594
positive regulation of glucagon secretion (GO:0070094)	5	1	0.03	+	39.26	0.03	0.593
relaxation of cardiac muscle (GO:0055119)	10	2	0.05	+	39.26	0.00163	0.112
isopentenyl diphosphate biosynthetic process (GO:0009240)	5	1	0.03	+	39.26	0.03	0.592
positive regulation of Schwann cell migration (GO:1900149)	5	1	0.03	+	39.26	0.03	0.592
dipeptide transmembrane transport (GO:0035442)	5	1	0.03	+	39.26	0.03	0.591
regulation of Ras GTPase binding (GO:1904475)	5	1	0.03	+	39.26	0.03	0.59
negative regulation of SMAD protein complex assembly (GO:0010991)	5	1	0.03	+	39.26	0.03	0.589
regulation of cellular response to heat (GO:1900034)	5	1	0.03	+	39.26	0.03	0.589
positive regulation of isomerase activity (GO:0010912)	5	1	0.03	+	39.26	0.03	0.588
regulation of isomerase activity (GO:0010911)	5	1	0.03	+	39.26	0.03	0.587
bundle of His cell action potential (GO:0086043)	5	1	0.03	+	39.26	0.03	0.587
bundle of His cell to Purkinje myocyte signaling (GO:0086028)	5	1	0.03	+	39.26	0.03	0.586
ubiquitin-dependent glycoprotein ERAD pathway (GO:0097466)	5	1	0.03	+	39.26	0.03	0.585
cell adhesion involved in heart morphogenesis (GO:0061343)	5	1	0.03	+	39.26	0.03	0.584
positive regulation of eating behavior (GO:1904000)	5	1	0.03	+	39.26	0.03	0.584
isopentenyl diphosphate metabolic process (GO:0046490)	5	1	0.03	+	39.26	0.03	0.583
substrate-independent telencephalic tangential interneuron migration (GO:0021843)	10	2	0.05	+	39.26	0.00163	0.111
substrate-independent telencephalic tangential migration (GO:0021826)	10	2	0.05	+	39.26	0.00163	0.111
amyloid fibril formation (GO:1990000)	11	2	0.06	+	35.69	0.00191	0.126
detoxification of copper ion (GO:0010273)	6	1	0.03	+	32.72	0.0349	0.644
regulation of forebrain neuron differentiation (GO:2000977)	6	1	0.03	+	32.72	0.0349	0.644
negative regulation of apoptotic process in bone marrow cell (GO:0071866)	6	1	0.03	+	32.72	0.0349	0.643
regulation of apoptotic process in bone marrow cell (GO:0071865)	6	1	0.03	+	32.72	0.0349	0.642
Fc receptor mediated stimulatory signaling pathway (GO:0002431)	6	1	0.03	+	32.72	0.0349	0.641
somatic motor neuron differentiation (GO:0021523)	6	1	0.03	+	32.72	0.0349	0.641
mammary gland involution (GO:0060056)	6	1	0.03	+	32.72	0.0349	0.64
cellular response to UV-C (GO:0071494)	6	1	0.03	+	32.72	0.0349	0.639
disaccharide metabolic process (GO:0005984)	6	1	0.03	+	32.72	0.0349	0.638
positive regulation of feeding behavior (GO:2000253)	12	2	0.06	+	32.72	0.00223	0.139
D-aspartate import across plasma membrane (GO:0070779)	6	1	0.03	+	32.72	0.0349	0.638
D-aspartate transport (GO:0070777)	6	1	0.03	+	32.72	0.0349	0.637
regulation of membrane repolarization during action potential (GO:0098903)	6	1	0.03	+	32.72	0.0349	0.636
stress response to copper ion (GO:1990169)	6	1	0.03	+	32.72	0.0349	0.635
regulation of asymmetric cell division (GO:0009786)	6	1	0.03	+	32.72	0.0349	0.635
endonucleolytic cleavage in 5'-ETS of tricistronic rRNA transcript (SSU-rRNA, 5.8S rRNA, LSU-rRNA) (GO:0000480)	6	1	0.03	+	32.72	0.0349	0.634
interneuron migration (GO:1904936)	6	1	0.03	+	32.72	0.0349	0.633
intracellular distribution of mitochondria (GO:0048312)	12	2	0.06	+	32.72	0.00223	0.139
amacrine cell differentiation (GO:0035881)	6	1	0.03	+	32.72	0.0349	0.632
circadian sleep/wake cycle (GO:0042745)	6	1	0.03	+	32.72	0.0349	0.632
response to glycoprotein (GO:1904587)	6	1	0.03	+	32.72	0.0349	0.631
endothelin receptor signaling pathway (GO:0086100)	6	1	0.03	+	32.72	0.0349	0.63
regulation of SMAD protein complex assembly (GO:0010990)	6	1	0.03	+	32.72	0.0349	0.63
negative regulation of endoplasmic reticulum stress-induced eIF2 alpha phosphorylation (GO:1903912)	6	1	0.03	+	32.72	0.0349	0.629
negative regulation of cGMP-mediated signaling (GO:0010754)	6	1	0.03	+	32.72	0.0349	0.628
neural plate pattern specification (GO:0060896)	6	1	0.03	+	32.72	0.0349	0.627
chorionic trophoblast cell differentiation (GO:0060718)	6	1	0.03	+	32.72	0.0349	0.627
positive regulation of tau-protein kinase activity (GO:1902949)	6	1	0.03	+	32.72	0.0349	0.626
forebrain ventricular zone progenitor cell division (GO:0021869)	6	1	0.03	+	32.72	0.0349	0.625
cerebral cortex GABAergic interneuron migration (GO:0021853)	6	1	0.03	+	32.72	0.0349	0.625
fibroblast activation (GO:0072537)	6	1	0.03	+	32.72	0.0349	0.624
positive regulation of vascular associated smooth muscle cell migration (GO:1904754)	19	3	0.1	+	31	0.000182	0.021
negative regulation of transcription from RNA polymerase II promoter in response to stress (GO:0097201)	13	2	0.07	+	30.2	0.00256	0.154
negative regulation of hydrogen peroxide-induced neuron death (GO:1903208)	7	1	0.04	+	28.05	0.0398	0.694
regulation of hydrogen peroxide-induced neuron death (GO:1903207)	7	1	0.04	+	28.05	0.0398	0.693
bud elongation involved in lung branching (GO:0060449)	7	1	0.04	+	28.05	0.0398	0.692
regulation of melanocyte differentiation (GO:0045634)	7	1	0.04	+	28.05	0.0398	0.692
metanephric nephron tubule morphogenesis (GO:0072282)	7	1	0.04	+	28.05	0.0398	0.691
regulation of dendritic cell differentiation (GO:2001198)	7	1	0.04	+	28.05	0.0398	0.69
S-shaped body morphogenesis (GO:0072050)	7	1	0.04	+	28.05	0.0398	0.689
regulation of keratinocyte apoptotic process (GO:1902172)	7	1	0.04	+	28.05	0.0398	0.689
aggresome assembly (GO:0070842)	7	1	0.04	+	28.05	0.0398	0.688
regulation of microvillus length (GO:0032532)	7	1	0.04	+	28.05	0.0398	0.687
positive regulation of inclusion body assembly (GO:0090261)	7	1	0.04	+	28.05	0.0398	0.686
negative regulation of mitochondrial fission (GO:0090258)	7	1	0.04	+	28.05	0.0398	0.686
negative regulation of skeletal muscle tissue development (GO:0048642)	7	1	0.04	+	28.05	0.0398	0.685
positive regulation of pigment cell differentiation (GO:0050942)	7	1	0.04	+	28.05	0.0398	0.684
regulation of timing of cell differentiation (GO:0048505)	14	2	0.07	+	28.05	0.00292	0.173
regulation of translation in response to stress (GO:0043555)	14	2	0.07	+	28.05	0.00292	0.172
imitative learning (GO:0098596)	7	1	0.04	+	28.05	0.0398	0.683
otic vesicle formation (GO:0030916)	7	1	0.04	+	28.05	0.0398	0.683
positive regulation of core promoter binding (GO:1904798)	7	1	0.04	+	28.05	0.0398	0.682
positive regulation of protein localization to centrosome (GO:1904781)	7	1	0.04	+	28.05	0.0398	0.681
oligopeptide transmembrane transport (GO:0035672)	7	1	0.04	+	28.05	0.0398	0.68
negative regulation of tubulin deacetylation (GO:1904428)	7	1	0.04	+	28.05	0.0398	0.68
amyloid-beta clearance by cellular catabolic process (GO:0150094)	7	1	0.04	+	28.05	0.0398	0.679
vocal learning (GO:0042297)	7	1	0.04	+	28.05	0.0398	0.678
retinal rod cell development (GO:0046548)	14	2	0.07	+	28.05	0.00292	0.172
platelet activating factor metabolic process (GO:0046469)	7	1	0.04	+	28.05	0.0398	0.678
pancreatic A cell differentiation (GO:0003310)	7	1	0.04	+	28.05	0.0398	0.677
muscle atrophy (GO:0014889)	7	1	0.04	+	28.05	0.0398	0.676
positive regulation of cell fate commitment (GO:0010455)	7	1	0.04	+	28.05	0.0398	0.675
rostrocaudal neural tube patterning (GO:0021903)	14	2	0.07	+	28.05	0.00292	0.171
commitment of neuronal cell to specific neuron type in forebrain (GO:0021902)	7	1	0.04	+	28.05	0.0398	0.675
epithelial cell proliferation involved in salivary gland morphogenesis (GO:0060664)	7	1	0.04	+	28.05	0.0398	0.674
iris morphogenesis (GO:0061072)	7	1	0.04	+	28.05	0.0398	0.673
forebrain neuroblast division (GO:0021873)	7	1	0.04	+	28.05	0.0398	0.672
cerebral cortex tangential migration (GO:0021800)	7	1	0.04	+	28.05	0.0398	0.672
prostate epithelial cord arborization involved in prostate glandular acinus morphogenesis (GO:0060527)	7	1	0.04	+	28.05	0.0398	0.671
prostate glandular acinus morphogenesis (GO:0060526)	7	1	0.04	+	28.05	0.0398	0.67
positive regulation of epithelial cell proliferation involved in lung morphogenesis (GO:0060501)	7	1	0.04	+	28.05	0.0398	0.67
central nervous system projection neuron axonogenesis (GO:0021952)	29	4	0.15	+	27.08	2.28e-05	0.00388
olfactory bulb interneuron differentiation (GO:0021889)	15	2	0.08	+	26.18	0.00329	0.187
regulation of pro-B cell differentiation (GO:2000973)	8	1	0.04	+	24.54	0.0447	0.731
cranial suture morphogenesis (GO:0060363)	8	1	0.04	+	24.54	0.0447	0.73
myeloid progenitor cell differentiation (GO:0002318)	8	1	0.04	+	24.54	0.0447	0.73
negative regulation of amyloid-beta formation (GO:1902430)	16	2	0.08	+	24.54	0.00369	0.203
relaxation of vascular associated smooth muscle (GO:0060087)	8	1	0.04	+	24.54	0.0447	0.729
regulation of glycogen (starch) synthase activity (GO:2000465)	8	1	0.04	+	24.54	0.0447	0.728
N-glycan processing (GO:0006491)	16	2	0.08	+	24.54	0.00369	0.202
cellular response to X-ray (GO:0071481)	8	1	0.04	+	24.54	0.0447	0.727
skeletal muscle acetylcholine-gated channel clustering (GO:0071340)	8	1	0.04	+	24.54	0.0447	0.727
inclusion body assembly (GO:0070841)	8	1	0.04	+	24.54	0.0447	0.726
regulation of amyloid fibril formation (GO:1905906)	8	1	0.04	+	24.54	0.0447	0.725
negative regulation of hematopoietic progenitor cell differentiation (GO:1901533)	8	1	0.04	+	24.54	0.0447	0.724
regulation of development, heterochronic (GO:0040034)	16	2	0.08	+	24.54	0.00369	0.202
semicircular canal morphogenesis (GO:0048752)	8	1	0.04	+	24.54	0.0447	0.724
positive regulation of Wnt signaling pathway, planar cell polarity pathway (GO:2000096)	8	1	0.04	+	24.54	0.0447	0.723
synapse pruning (GO:0098883)	8	1	0.04	+	24.54	0.0447	0.722
positive regulation of translation in response to stress (GO:0032056)	8	1	0.04	+	24.54	0.0447	0.721
renal absorption (GO:0070293)	16	2	0.08	+	24.54	0.00369	0.201
myelin maintenance (GO:0043217)	16	2	0.08	+	24.54	0.00369	0.2
positive regulation of developmental pigmentation (GO:0048087)	8	1	0.04	+	24.54	0.0447	0.721
regulation of Schwann cell migration (GO:1900147)	8	1	0.04	+	24.54	0.0447	0.72
detoxification of inorganic compound (GO:0061687)	8	1	0.04	+	24.54	0.0447	0.719
regulation of skeletal muscle acetylcholine-gated channel clustering (GO:1904393)	8	1	0.04	+	24.54	0.0447	0.719
stress response to metal ion (GO:0097501)	8	1	0.04	+	24.54	0.0447	0.718
microglial cell proliferation (GO:0061518)	8	1	0.04	+	24.54	0.0447	0.717
macrophage proliferation (GO:0061517)	8	1	0.04	+	24.54	0.0447	0.716
negative regulation of phospholipase activity (GO:0010519)	8	1	0.04	+	24.54	0.0447	0.716
regulation of extracellular matrix constituent secretion (GO:0003330)	8	1	0.04	+	24.54	0.0447	0.715
telencephalon regionalization (GO:0021978)	16	2	0.08	+	24.54	0.00369	0.2
positive regulation of aspartic-type endopeptidase activity involved in amyloid precursor protein catabolic process (GO:1902961)	8	1	0.04	+	24.54	0.0447	0.714
cerebral cortex GABAergic interneuron development (GO:0021894)	8	1	0.04	+	24.54	0.0447	0.713
forebrain radial glial cell differentiation (GO:0021861)	8	1	0.04	+	24.54	0.0447	0.713
epithelial cell proliferation involved in liver morphogenesis (GO:0072575)	8	1	0.04	+	24.54	0.0447	0.712
hepatocyte proliferation (GO:0072574)	8	1	0.04	+	24.54	0.0447	0.711
regulation of vascular associated smooth muscle cell migration (GO:1904752)	25	3	0.13	+	23.56	0.000378	0.0366
chaperone-mediated protein complex assembly (GO:0051131)	17	2	0.09	+	23.1	0.00411	0.218
regulation of transcription involved in cell fate commitment (GO:0060850)	17	2	0.09	+	23.1	0.00411	0.217
cerebral cortex regionalization (GO:0021796)	9	1	0.05	+	21.81	0.0495	0.773
lung lobe morphogenesis (GO:0060463)	9	1	0.05	+	21.81	0.0495	0.772
lung lobe development (GO:0060462)	9	1	0.05	+	21.81	0.0495	0.771
positive regulation of cardiac muscle contraction (GO:0060452)	9	1	0.05	+	21.81	0.0495	0.77
positive regulation of penile erection (GO:0060406)	9	1	0.05	+	21.81	0.0495	0.77
chronic inflammatory response (GO:0002544)	9	1	0.05	+	21.81	0.0495	0.769
tangential migration from the subventricular zone to the olfactory bulb (GO:0022028)	9	1	0.05	+	21.81	0.0495	0.768
rhombomere development (GO:0021546)	9	1	0.05	+	21.81	0.0495	0.767
regulation of epithelial cell proliferation involved in lung morphogenesis (GO:2000794)	9	1	0.05	+	21.81	0.0495	0.767
retinal rod cell differentiation (GO:0060221)	18	2	0.09	+	21.81	0.00456	0.234
positive regulation of protein localization to synapse (GO:1902474)	9	1	0.05	+	21.81	0.0495	0.766
otic vesicle morphogenesis (GO:0071600)	9	1	0.05	+	21.81	0.0495	0.765
renal system pattern specification (GO:0072048)	9	1	0.05	+	21.81	0.0495	0.764
actin filament reorganization (GO:0090527)	9	1	0.05	+	21.81	0.0495	0.764
cellular response to follicle-stimulating hormone stimulus (GO:0071372)	9	1	0.05	+	21.81	0.0495	0.763
relaxation of smooth muscle (GO:0044557)	9	1	0.05	+	21.81	0.0495	0.762
phosphatidylserine exposure on apoptotic cell surface (GO:0070782)	9	1	0.05	+	21.81	0.0495	0.761
negative regulation of cell-cell adhesion mediated by cadherin (GO:2000048)	9	1	0.05	+	21.81	0.0495	0.761
equilibrioception (GO:0050957)	9	1	0.05	+	21.81	0.0495	0.76
regulation of pigment cell differentiation (GO:0050932)	9	1	0.05	+	21.81	0.0495	0.759
positive regulation of extracellular matrix assembly (GO:1901203)	9	1	0.05	+	21.81	0.0495	0.759
regulation of nucleotide-binding oligomerization domain containing signaling pathway (GO:0070424)	9	1	0.05	+	21.81	0.0495	0.758
negative regulation of insulin-like growth factor receptor signaling pathway (GO:0043569)	9	1	0.05	+	21.81	0.0495	0.757
observational learning (GO:0098597)	9	1	0.05	+	21.81	0.0495	0.756
regulation of skeletal muscle tissue regeneration (GO:0043416)	9	1	0.05	+	21.81	0.0495	0.756
D-amino acid transport (GO:0042940)	9	1	0.05	+	21.81	0.0495	0.755
midbrain-hindbrain boundary development (GO:0030917)	9	1	0.05	+	21.81	0.0495	0.754
positive regulation of aspartic-type peptidase activity (GO:1905247)	9	1	0.05	+	21.81	0.0495	0.753
common myeloid progenitor cell proliferation (GO:0035726)	9	1	0.05	+	21.81	0.0495	0.753
regulation of core promoter binding (GO:1904796)	9	1	0.05	+	21.81	0.0495	0.752
regulation of phosphate transport (GO:0010966)	9	1	0.05	+	21.81	0.0495	0.751
negative regulation of establishment of protein localization to mitochondrion (GO:1903748)	9	1	0.05	+	21.81	0.0495	0.751
regulation of Schwann cell proliferation (GO:0010624)	9	1	0.05	+	21.81	0.0495	0.75
chorion development (GO:0060717)	9	1	0.05	+	21.81	0.0495	0.749
corticospinal tract morphogenesis (GO:0021957)	9	1	0.05	+	21.81	0.0495	0.748
negative regulation of amyloid precursor protein catabolic process (GO:1902992)	18	2	0.09	+	21.81	0.00456	0.233
mesenchymal-epithelial cell signaling (GO:0060638)	9	1	0.05	+	21.81	0.0495	0.748
lateral sprouting from an epithelium (GO:0060601)	9	1	0.05	+	21.81	0.0495	0.747
olfactory bulb interneuron development (GO:0021891)	9	1	0.05	+	21.81	0.0495	0.746
pattern specification involved in kidney development (GO:0061004)	9	1	0.05	+	21.81	0.0495	0.745
mammary gland formation (GO:0060592)	9	1	0.05	+	21.81	0.0495	0.745
multicellular organismal iron ion homeostasis (GO:0060586)	9	1	0.05	+	21.81	0.0495	0.744
morphogenesis of an epithelial bud (GO:0060572)	9	1	0.05	+	21.81	0.0495	0.743
enteric nervous system development (GO:0048484)	19	2	0.1	+	20.67	0.00502	0.248
branch elongation of an epithelium (GO:0060602)	19	2	0.1	+	20.67	0.00502	0.247
regulation of inner ear receptor cell differentiation (GO:2000980)	10	1	0.05	+	19.63	0.0544	0.795
lung-associated mesenchyme development (GO:0060484)	10	1	0.05	+	19.63	0.0544	0.795
cellular response to nitrogen starvation (GO:0006995)	10	1	0.05	+	19.63	0.0544	0.794
regulation of mechanoreceptor differentiation (GO:0045631)	10	1	0.05	+	19.63	0.0544	0.793
regulation of inner ear auditory receptor cell differentiation (GO:0045607)	10	1	0.05	+	19.63	0.0544	0.792
phenol-containing compound catabolic process (GO:0019336)	10	1	0.05	+	19.63	0.0544	0.792
positive regulation of cell proliferation in bone marrow (GO:0071864)	10	1	0.05	+	19.63	0.0544	0.791
interkinetic nuclear migration (GO:0022027)	10	1	0.05	+	19.63	0.0544	0.79
positive regulation of cysteine-type endopeptidase activity involved in apoptotic signaling pathway (GO:2001269)	10	1	0.05	+	19.63	0.0544	0.789
metanephric tubule morphogenesis (GO:0072173)	10	1	0.05	+	19.63	0.0544	0.789
loop of Henle development (GO:0072070)	10	1	0.05	+	19.63	0.0544	0.788
protein deglycosylation (GO:0006517)	10	1	0.05	+	19.63	0.0544	0.787
negative regulation of muscle tissue development (GO:1901862)	20	2	0.1	+	19.63	0.0055	0.269
glutamate secretion (GO:0014047)	10	1	0.05	+	19.63	0.0544	0.787
glycogen catabolic process (GO:0005980)	10	1	0.05	+	19.63	0.0544	0.786
glutamatergic neuron differentiation (GO:1905962)	10	1	0.05	+	19.63	0.0544	0.785
negative regulation of dendrite development (GO:2000171)	10	1	0.05	+	19.63	0.0544	0.784
regulation of fibroblast growth factor production (GO:0090270)	10	1	0.05	+	19.63	0.0544	0.784
response to follicle-stimulating hormone (GO:0032354)	10	1	0.05	+	19.63	0.0544	0.783
positive regulation of synaptic transmission, cholinergic (GO:0032224)	10	1	0.05	+	19.63	0.0544	0.782
cellular response to leucine starvation (GO:1990253)	10	1	0.05	+	19.63	0.0544	0.781
relaxation of muscle (GO:0090075)	20	2	0.1	+	19.63	0.0055	0.268
cellular response to nitrogen levels (GO:0043562)	10	1	0.05	+	19.63	0.0544	0.781
regulation of lymphoid progenitor cell differentiation (GO:1905456)	10	1	0.05	+	19.63	0.0544	0.78
mitochondrion distribution (GO:0048311)	20	2	0.1	+	19.63	0.0055	0.267
positive regulation of long-term synaptic depression (GO:1900454)	10	1	0.05	+	19.63	0.0544	0.779
glucan catabolic process (GO:0009251)	10	1	0.05	+	19.63	0.0544	0.779
regulation of receptor clustering (GO:1903909)	20	2	0.1	+	19.63	0.0055	0.266
cell junction disassembly (GO:0150146)	10	1	0.05	+	19.63	0.0544	0.778
negative regulation of fibroblast migration (GO:0010764)	10	1	0.05	+	19.63	0.0544	0.777
regulation of plasma membrane organization (GO:1903729)	10	1	0.05	+	19.63	0.0544	0.777
cornea development in camera-type eye (GO:0061303)	10	1	0.05	+	19.63	0.0544	0.776
semicircular canal development (GO:0060872)	10	1	0.05	+	19.63	0.0544	0.775
epithelial fluid transport (GO:0042045)	10	1	0.05	+	19.63	0.0544	0.774
presynaptic membrane assembly (GO:0097105)	10	1	0.05	+	19.63	0.0544	0.774
postsynaptic membrane assembly (GO:0097104)	10	1	0.05	+	19.63	0.0544	0.773
negative regulation of cell maturation (GO:1903430)	10	1	0.05	+	19.63	0.0544	0.772
regulation of aspartic-type endopeptidase activity involved in amyloid precursor protein catabolic process (GO:1902959)	10	1	0.05	+	19.63	0.0544	0.772
liver morphogenesis (GO:0072576)	10	1	0.05	+	19.63	0.0544	0.771
membranous septum morphogenesis (GO:0003149)	10	1	0.05	+	19.63	0.0544	0.77
neuromuscular junction development (GO:0007528)	50	5	0.25	+	19.63	8.69e-06	0.0018
positive regulation of neuron migration (GO:2001224)	21	2	0.11	+	18.7	0.00601	0.283
positive regulation of amyloid-beta formation (GO:1902004)	21	2	0.11	+	18.7	0.00601	0.282
dendritic spine morphogenesis (GO:0060997)	21	2	0.11	+	18.7	0.00601	0.281
central nervous system neuron axonogenesis (GO:0021955)	42	4	0.21	+	18.7	8.66e-05	0.0117
regulation of penile erection (GO:0060405)	11	1	0.06	+	17.85	0.0592	0.829
regulation of cell proliferation in bone marrow (GO:0071863)	11	1	0.06	+	17.85	0.0592	0.828
neuronal action potential propagation (GO:0019227)	11	1	0.06	+	17.85	0.0592	0.827
positive regulation of cardiac muscle cell differentiation (GO:2000727)	11	1	0.06	+	17.85	0.0592	0.826
nephric duct morphogenesis (GO:0072178)	11	1	0.06	+	17.85	0.0592	0.826
limb bud formation (GO:0060174)	11	1	0.06	+	17.85	0.0592	0.825
auditory receptor cell stereocilium organization (GO:0060088)	22	2	0.11	+	17.85	0.00653	0.301
Bergmann glial cell differentiation (GO:0060020)	11	1	0.06	+	17.85	0.0592	0.824
righting reflex (GO:0060013)	11	1	0.06	+	17.85	0.0592	0.823
Fc receptor signaling pathway (GO:0038093)	11	1	0.06	+	17.85	0.0592	0.823
regulation of protein neddylation (GO:2000434)	11	1	0.06	+	17.85	0.0592	0.822
positive regulation of intrinsic apoptotic signaling pathway in response to DNA damage (GO:1902231)	11	1	0.06	+	17.85	0.0592	0.821
peptidyl-proline hydroxylation to 4-hydroxy-L-proline (GO:0018401)	11	1	0.06	+	17.85	0.0592	0.821
regulation of glucocorticoid receptor signaling pathway (GO:2000322)	11	1	0.06	+	17.85	0.0592	0.82
protein localization to axon (GO:0099612)	11	1	0.06	+	17.85	0.0592	0.819
postsynapse to nucleus signaling pathway (GO:0099527)	11	1	0.06	+	17.85	0.0592	0.818
positive regulation of transcription from RNA polymerase II promoter in response to endoplasmic reticulum stress (GO:1990440)	11	1	0.06	+	17.85	0.0592	0.818
cellular polysaccharide catabolic process (GO:0044247)	11	1	0.06	+	17.85	0.0592	0.817
lipid digestion (GO:0044241)	11	1	0.06	+	17.85	0.0592	0.816
action potential propagation (GO:0098870)	11	1	0.06	+	17.85	0.0592	0.816
insulin metabolic process (GO:1901142)	11	1	0.06	+	17.85	0.0592	0.815
regulation of fever generation (GO:0031620)	11	1	0.06	+	17.85	0.0592	0.814
positive regulation of insulin-like growth factor receptor signaling pathway (GO:0043568)	11	1	0.06	+	17.85	0.0592	0.813
mesendoderm development (GO:0048382)	11	1	0.06	+	17.85	0.0592	0.813
sequestering of actin monomers (GO:0042989)	11	1	0.06	+	17.85	0.0592	0.812
regulation of aspartic-type peptidase activity (GO:1905245)	11	1	0.06	+	17.85	0.0592	0.811
regulation of protein localization to centrosome (GO:1904779)	11	1	0.06	+	17.85	0.0592	0.811
regulation of guanyl-nucleotide exchange factor activity (GO:1905097)	11	1	0.06	+	17.85	0.0592	0.81
positive regulation of receptor clustering (GO:1903911)	11	1	0.06	+	17.85	0.0592	0.809
extraembryonic membrane development (GO:1903867)	11	1	0.06	+	17.85	0.0592	0.808
negative regulation of sprouting angiogenesis (GO:1903671)	11	1	0.06	+	17.85	0.0592	0.808
presynaptic membrane organization (GO:0097090)	11	1	0.06	+	17.85	0.0592	0.807
cerebral cortex GABAergic interneuron differentiation (GO:0021892)	11	1	0.06	+	17.85	0.0592	0.806
cellular response to cadmium ion (GO:0071276)	23	2	0.12	+	17.07	0.00708	0.317
regulation of respiratory gaseous exchange (GO:0043576)	23	2	0.12	+	17.07	0.00708	0.316
melanocyte differentiation (GO:0030318)	23	2	0.12	+	17.07	0.00708	0.316
regulation of amyloid-beta formation (GO:1902003)	35	3	0.18	+	16.83	0.000939	0.0772
cell proliferation in forebrain (GO:0021846)	35	3	0.18	+	16.83	0.000939	0.0768
oligodendrocyte differentiation (GO:0048709)	71	6	0.36	+	16.59	2.62e-06	0.000725
regulation of Fc receptor mediated stimulatory signaling pathway (GO:0060368)	12	1	0.06	+	16.36	0.0639	0.855
oligopeptide transport (GO:0006857)	12	1	0.06	+	16.36	0.0639	0.854
central nervous system myelination (GO:0022010)	24	2	0.12	+	16.36	0.00764	0.332
ventral spinal cord interneuron specification (GO:0021521)	12	1	0.06	+	16.36	0.0639	0.854
regulation of calcium ion transmembrane transport via high voltage-gated calcium channel (GO:1902514)	12	1	0.06	+	16.36	0.0639	0.853
nephric duct development (GO:0072176)	12	1	0.06	+	16.36	0.0639	0.852
cellular response to acidic pH (GO:0071468)	12	1	0.06	+	16.36	0.0639	0.852
ovulation from ovarian follicle (GO:0001542)	12	1	0.06	+	16.36	0.0639	0.851
peripheral nervous system neuron development (GO:0048935)	12	1	0.06	+	16.36	0.0639	0.85
peripheral nervous system neuron differentiation (GO:0048934)	12	1	0.06	+	16.36	0.0639	0.849
type B pancreatic cell proliferation (GO:0044342)	12	1	0.06	+	16.36	0.0639	0.849
dorsal/ventral axis specification (GO:0009950)	12	1	0.06	+	16.36	0.0639	0.848
axon ensheathment in central nervous system (GO:0032291)	24	2	0.12	+	16.36	0.00764	0.331
regulation of tubulin deacetylation (GO:0090043)	12	1	0.06	+	16.36	0.0639	0.847
regulation of oligodendrocyte progenitor proliferation (GO:0070445)	12	1	0.06	+	16.36	0.0639	0.847
positive regulation of vascular associated smooth muscle cell proliferation (GO:1904707)	36	3	0.18	+	16.36	0.00101	0.0808
negative regulation of long-term synaptic potentiation (GO:1900272)	12	1	0.06	+	16.36	0.0639	0.846
retinal cone cell differentiation (GO:0042670)	12	1	0.06	+	16.36	0.0639	0.845
negative regulation of neurotransmitter secretion (GO:0046929)	12	1	0.06	+	16.36	0.0639	0.844
regulation of eating behavior (GO:1903998)	12	1	0.06	+	16.36	0.0639	0.844
membrane depolarization during cardiac muscle cell action potential (GO:0086012)	12	1	0.06	+	16.36	0.0639	0.843
hormone catabolic process (GO:0042447)	12	1	0.06	+	16.36	0.0639	0.842
dopamine biosynthetic process (GO:0042416)	12	1	0.06	+	16.36	0.0639	0.842
liver regeneration (GO:0097421)	12	1	0.06	+	16.36	0.0639	0.841
regulation of type B pancreatic cell proliferation (GO:0061469)	12	1	0.06	+	16.36	0.0639	0.84
phosphatidylcholine catabolic process (GO:0034638)	12	1	0.06	+	16.36	0.0639	0.839
retinal cone cell development (GO:0046549)	12	1	0.06	+	16.36	0.0639	0.839
actin filament depolymerization (GO:0030042)	12	1	0.06	+	16.36	0.0639	0.838
regulation of tau-protein kinase activity (GO:1902947)	12	1	0.06	+	16.36	0.0639	0.837
negative regulation of muscle adaptation (GO:0014745)	12	1	0.06	+	16.36	0.0639	0.837
cell fate specification involved in pattern specification (GO:0060573)	12	1	0.06	+	16.36	0.0639	0.836
prostate glandular acinus development (GO:0060525)	12	1	0.06	+	16.36	0.0639	0.835
axonal fasciculation (GO:0007413)	25	2	0.13	+	15.71	0.00823	0.348
reflex (GO:0060004)	25	2	0.13	+	15.71	0.00823	0.347
auditory receptor cell morphogenesis (GO:0002093)	25	2	0.13	+	15.71	0.00823	0.346
neuron projection fasciculation (GO:0106030)	25	2	0.13	+	15.71	0.00823	0.345
regulation of renal sodium excretion (GO:0035813)	25	2	0.13	+	15.71	0.00823	0.344
neuron projection regeneration (GO:0031102)	25	2	0.13	+	15.71	0.00823	0.343
olfactory bulb development (GO:0021772)	38	3	0.19	+	15.5	0.00117	0.0899
positive regulation of G1/S transition of mitotic cell cycle (GO:1900087)	38	3	0.19	+	15.5	0.00117	0.0895
cardiac muscle cell contraction (GO:0086003)	38	3	0.19	+	15.5	0.00117	0.0891
regulation of DNA-templated transcription in response to stress (GO:0043620)	51	4	0.26	+	15.4	0.000175	0.0204
brown fat cell differentiation (GO:0050873)	39	3	0.2	+	15.1	0.00126	0.0942
eye photoreceptor cell development (GO:0042462)	39	3	0.2	+	15.1	0.00126	0.0938
positive regulation of cyclin-dependent protein serine/threonine kinase activity (GO:0045737)	26	2	0.13	+	15.1	0.00883	0.365
branching involved in prostate gland morphogenesis (GO:0060442)	13	1	0.07	+	15.1	0.0687	0.887
negative regulation of pathway-restricted SMAD protein phosphorylation (GO:0060394)	13	1	0.07	+	15.1	0.0687	0.886
negative regulation of neuron migration (GO:2001223)	13	1	0.07	+	15.1	0.0687	0.886
spinal cord motor neuron cell fate specification (GO:0021520)	13	1	0.07	+	15.1	0.0687	0.885
metanephric nephron tubule development (GO:0072234)	13	1	0.07	+	15.1	0.0687	0.884
thyroid hormone generation (GO:0006590)	13	1	0.07	+	15.1	0.0687	0.883
regulation of high voltage-gated calcium channel activity (GO:1901841)	13	1	0.07	+	15.1	0.0687	0.883
C-terminal protein amino acid modification (GO:0018410)	13	1	0.07	+	15.1	0.0687	0.882
regulation of respiratory gaseous exchange by nervous system process (GO:0002087)	13	1	0.07	+	15.1	0.0687	0.881
neuronal ion channel clustering (GO:0045161)	13	1	0.07	+	15.1	0.0687	0.881
cellular response to zinc ion (GO:0071294)	13	1	0.07	+	15.1	0.0687	0.88
actin filament network formation (GO:0051639)	13	1	0.07	+	15.1	0.0687	0.879
negative regulation of protein autophosphorylation (GO:0031953)	13	1	0.07	+	15.1	0.0687	0.878
positive regulation of oligodendrocyte differentiation (GO:0048714)	26	2	0.13	+	15.1	0.00883	0.364
regulation of extracellular matrix assembly (GO:1901201)	13	1	0.07	+	15.1	0.0687	0.878
peptidyl-serine dephosphorylation (GO:0070262)	13	1	0.07	+	15.1	0.0687	0.877
positive regulation of urine volume (GO:0035810)	13	1	0.07	+	15.1	0.0687	0.876
regulation of glucagon secretion (GO:0070092)	13	1	0.07	+	15.1	0.0687	0.876
auditory behavior (GO:0031223)	13	1	0.07	+	15.1	0.0687	0.875
regulation of developmental pigmentation (GO:0048070)	13	1	0.07	+	15.1	0.0687	0.874
positive regulation of glial cell migration (GO:1903977)	13	1	0.07	+	15.1	0.0687	0.873
bundle of His cell to Purkinje myocyte communication (GO:0086069)	13	1	0.07	+	15.1	0.0687	0.873
serotonin metabolic process (GO:0042428)	13	1	0.07	+	15.1	0.0687	0.872
cellular response to forskolin (GO:1904322)	13	1	0.07	+	15.1	0.0687	0.871
response to forskolin (GO:1904321)	13	1	0.07	+	15.1	0.0687	0.871
sleep (GO:0030431)	13	1	0.07	+	15.1	0.0687	0.87
plasma membrane tubulation (GO:0097320)	13	1	0.07	+	15.1	0.0687	0.869
branching involved in labyrinthine layer morphogenesis (GO:0060670)	13	1	0.07	+	15.1	0.0687	0.869
positive regulation of amyloid precursor protein catabolic process (GO:1902993)	26	2	0.13	+	15.1	0.00883	0.363
low-density lipoprotein particle remodeling (GO:0034374)	13	1	0.07	+	15.1	0.0687	0.868
negative regulation of cell growth involved in cardiac muscle cell development (GO:0061052)	13	1	0.07	+	15.1	0.0687	0.867
forebrain neuron fate commitment (GO:0021877)	13	1	0.07	+	15.1	0.0687	0.866
pyramidal neuron development (GO:0021860)	13	1	0.07	+	15.1	0.0687	0.866
long-term memory (GO:0007616)	40	3	0.2	+	14.72	0.00135	0.0977
regulation of neuron migration (GO:2001222)	54	4	0.28	+	14.54	0.000215	0.0242
actin nucleation (GO:0045010)	27	2	0.14	+	14.54	0.00945	0.387
forebrain regionalization (GO:0021871)	27	2	0.14	+	14.54	0.00945	0.386
olfactory lobe development (GO:0021988)	41	3	0.21	+	14.36	0.00144	0.103
central nervous system neuron development (GO:0021954)	97	7	0.49	+	14.17	1.01e-06	0.00037
regulation of amyloid precursor protein catabolic process (GO:1902991)	42	3	0.21	+	14.02	0.00154	0.108
response to UV-C (GO:0010225)	14	1	0.07	+	14.02	0.0734	0.92
mitotic cell cycle arrest (GO:0071850)	14	1	0.07	+	14.02	0.0734	0.919
mammary gland epithelial cell proliferation (GO:0033598)	14	1	0.07	+	14.02	0.0734	0.919
nitric oxide mediated signal transduction (GO:0007263)	14	1	0.07	+	14.02	0.0734	0.918
spinal cord association neuron differentiation (GO:0021527)	14	1	0.07	+	14.02	0.0734	0.917
regulation of exit from mitosis (GO:0007096)	14	1	0.07	+	14.02	0.0734	0.917
radial glial cell differentiation (GO:0060019)	14	1	0.07	+	14.02	0.0734	0.916
otic vesicle development (GO:0071599)	14	1	0.07	+	14.02	0.0734	0.915
regulation of neuron maturation (GO:0014041)	14	1	0.07	+	14.02	0.0734	0.914
protein neddylation (GO:0045116)	14	1	0.07	+	14.02	0.0734	0.914
cellular response to gonadotropin stimulus (GO:0071371)	14	1	0.07	+	14.02	0.0734	0.913
regulation of cell projection size (GO:0032536)	14	1	0.07	+	14.02	0.0734	0.912
trans-synaptic signaling, modulating synaptic transmission (GO:0099550)	14	1	0.07	+	14.02	0.0734	0.911
positive regulation of non-canonical Wnt signaling pathway (GO:2000052)	14	1	0.07	+	14.02	0.0734	0.911
myoblast migration (GO:0051451)	14	1	0.07	+	14.02	0.0734	0.91
circadian behavior (GO:0048512)	28	2	0.14	+	14.02	0.0101	0.402
positive regulation of renal sodium excretion (GO:0035815)	14	1	0.07	+	14.02	0.0734	0.909
polysaccharide catabolic process (GO:0000272)	14	1	0.07	+	14.02	0.0734	0.909
regulation of modification of synaptic structure (GO:1905244)	14	1	0.07	+	14.02	0.0734	0.908
phosphate ion transmembrane transport (GO:0035435)	14	1	0.07	+	14.02	0.0734	0.907
hepatocyte apoptotic process (GO:0097284)	14	1	0.07	+	14.02	0.0734	0.906
prostate gland growth (GO:0060736)	14	1	0.07	+	14.02	0.0734	0.906
positive regulation of striated muscle contraction (GO:0045989)	14	1	0.07	+	14.02	0.0734	0.905
peptidyl-proline hydroxylation (GO:0019511)	14	1	0.07	+	14.02	0.0734	0.904
forebrain generation of neurons (GO:0021872)	72	5	0.37	+	13.63	4.52e-05	0.0066
positive regulation of microtubule polymerization (GO:0031116)	29	2	0.15	+	13.54	0.0108	0.38
positive regulation of cyclin-dependent protein kinase activity (GO:1904031)	29	2	0.15	+	13.54	0.0108	0.379
prostate gland epithelium morphogenesis (GO:0060740)	29	2	0.15	+	13.54	0.0108	0.378
inner ear receptor cell stereocilium organization (GO:0060122)	44	3	0.22	+	13.39	0.00175	0.117
negative regulation of epidermis development (GO:0045683)	15	1	0.08	+	13.09	0.0781	0.947
negative regulation of epidermal cell differentiation (GO:0045605)	15	1	0.08	+	13.09	0.0781	0.947
segment specification (GO:0007379)	15	1	0.08	+	13.09	0.0781	0.946
heart trabecula formation (GO:0060347)	15	1	0.08	+	13.09	0.0781	0.945
negative regulation of anoikis (GO:2000811)	15	1	0.08	+	13.09	0.0781	0.945
metanephric nephron epithelium development (GO:0072243)	15	1	0.08	+	13.09	0.0781	0.944
positive regulation of viral release from host cell (GO:1902188)	15	1	0.08	+	13.09	0.0781	0.943
regulation of microvillus organization (GO:0032530)	15	1	0.08	+	13.09	0.0781	0.942
cellular response to copper ion (GO:0071280)	15	1	0.08	+	13.09	0.0781	0.942
negative regulation of cAMP-mediated signaling (GO:0043951)	30	2	0.15	+	13.09	0.0114	0.395
positive regulation of chromosome separation (GO:1905820)	15	1	0.08	+	13.09	0.0781	0.941
regulation of Wnt signaling pathway, planar cell polarity pathway (GO:2000095)	15	1	0.08	+	13.09	0.0781	0.94
regulation of postsynaptic neurotransmitter receptor activity (GO:0098962)	15	1	0.08	+	13.09	0.0781	0.94
positive regulation of voltage-gated calcium channel activity (GO:1901387)	15	1	0.08	+	13.09	0.0781	0.939
positive regulation of axon regeneration (GO:0048680)	15	1	0.08	+	13.09	0.0781	0.938
regulation of synaptic transmission, cholinergic (GO:0032222)	15	1	0.08	+	13.09	0.0781	0.937
primary amino compound metabolic process (GO:1901160)	15	1	0.08	+	13.09	0.0781	0.937
lens fiber cell development (GO:0070307)	15	1	0.08	+	13.09	0.0781	0.936
endonucleolytic cleavage of tricistronic rRNA transcript (SSU-rRNA, 5.8S rRNA, LSU-rRNA) (GO:0000479)	15	1	0.08	+	13.09	0.0781	0.935
endonucleolytic cleavage involved in rRNA processing (GO:0000478)	15	1	0.08	+	13.09	0.0781	0.935
actin filament severing (GO:0051014)	15	1	0.08	+	13.09	0.0781	0.934
macrophage chemotaxis (GO:0048246)	15	1	0.08	+	13.09	0.0781	0.933
regulation of amino acid import across plasma membrane (GO:0010958)	15	1	0.08	+	13.09	0.0781	0.932
negative regulation of mitochondrial membrane potential (GO:0010917)	15	1	0.08	+	13.09	0.0781	0.932
negative regulation of keratinocyte proliferation (GO:0010839)	15	1	0.08	+	13.09	0.0781	0.931
regulation of amino acid transmembrane transport (GO:1903789)	15	1	0.08	+	13.09	0.0781	0.93
response to gonadotropin (GO:0034698)	15	1	0.08	+	13.09	0.0781	0.93
epithelial cell differentiation involved in prostate gland development (GO:0060742)	15	1	0.08	+	13.09	0.0781	0.929
GABAergic neuron differentiation (GO:0097154)	15	1	0.08	+	13.09	0.0781	0.928
rhythmic behavior (GO:0007622)	30	2	0.15	+	13.09	0.0114	0.394
forebrain neuron differentiation (GO:0021879)	60	4	0.31	+	13.09	0.000314	0.0322
pyramidal neuron differentiation (GO:0021859)	15	1	0.08	+	13.09	0.0781	0.928
cardiac conduction system development (GO:0003161)	15	1	0.08	+	13.09	0.0781	0.927
prostate gland morphogenesis (GO:0060512)	30	2	0.15	+	13.09	0.0114	0.393
adult locomotory behavior (GO:0008344)	106	7	0.54	+	12.96	1.76e-06	0.000568
regulation of transcription from RNA polymerase II promoter in response to stress (GO:0043618)	46	3	0.23	+	12.8	0.00197	0.128
adult walking behavior (GO:0007628)	46	3	0.23	+	12.8	0.00197	0.128
salivary gland morphogenesis (GO:0007435)	31	2	0.16	+	12.67	0.0121	0.413
myelination in peripheral nervous system (GO:0022011)	31	2	0.16	+	12.67	0.0121	0.412
auditory receptor cell development (GO:0060117)	31	2	0.16	+	12.67	0.0121	0.411
peripheral nervous system axon ensheathment (GO:0032292)	31	2	0.16	+	12.67	0.0121	0.41
regulation of excretion (GO:0044062)	31	2	0.16	+	12.67	0.0121	0.409
axis elongation (GO:0003401)	31	2	0.16	+	12.67	0.0121	0.408
neuron projection organization (GO:0106027)	47	3	0.24	+	12.53	0.00209	0.133
walking behavior (GO:0090659)	48	3	0.24	+	12.27	0.00221	0.14
positive regulation of cell cycle G1/S phase transition (GO:1902808)	48	3	0.24	+	12.27	0.00221	0.139
epithelial tube branching involved in lung morphogenesis (GO:0060441)	32	2	0.16	+	12.27	0.0128	0.421
regulation of cysteine-type endopeptidase activity involved in apoptotic signaling pathway (GO:2001267)	16	1	0.08	+	12.27	0.0828	0.973
epithelial cell fate commitment (GO:0072148)	16	1	0.08	+	12.27	0.0828	0.972
negative regulation of oligodendrocyte differentiation (GO:0048715)	16	1	0.08	+	12.27	0.0828	0.971
positive regulation of neuron projection regeneration (GO:0070572)	16	1	0.08	+	12.27	0.0828	0.971
negative regulation of axon regeneration (GO:0048681)	16	1	0.08	+	12.27	0.0828	0.97
epithelial cell-cell adhesion (GO:0090136)	16	1	0.08	+	12.27	0.0828	0.969
regulation of inclusion body assembly (GO:0090083)	16	1	0.08	+	12.27	0.0828	0.968
regulation of heat generation (GO:0031650)	16	1	0.08	+	12.27	0.0828	0.968
regulation of respiratory system process (GO:0044065)	16	1	0.08	+	12.27	0.0828	0.967
ephrin receptor signaling pathway (GO:0048013)	32	2	0.16	+	12.27	0.0128	0.42
neuroblast division (GO:0055057)	16	1	0.08	+	12.27	0.0828	0.966
stabilization of membrane potential (GO:0030322)	16	1	0.08	+	12.27	0.0828	0.966
vasculogenesis involved in coronary vascular morphogenesis (GO:0060979)	16	1	0.08	+	12.27	0.0828	0.965
mesenchymal cell proliferation (GO:0010463)	16	1	0.08	+	12.27	0.0828	0.964
mechanosensory behavior (GO:0007638)	16	1	0.08	+	12.27	0.0828	0.963
mammary gland epithelial cell differentiation (GO:0060644)	16	1	0.08	+	12.27	0.0828	0.963
craniofacial suture morphogenesis (GO:0097094)	16	1	0.08	+	12.27	0.0828	0.962
Arp2/3 complex-mediated actin nucleation (GO:0034314)	16	1	0.08	+	12.27	0.0828	0.961
regulation of skeletal muscle adaptation (GO:0014733)	16	1	0.08	+	12.27	0.0828	0.961
cell fate commitment involved in pattern specification (GO:0060581)	16	1	0.08	+	12.27	0.0828	0.96
ventral spinal cord interneuron fate commitment (GO:0060579)	16	1	0.08	+	12.27	0.0828	0.959
regulation of oligodendrocyte differentiation (GO:0048713)	49	3	0.25	+	12.02	0.00234	0.144
camera-type eye photoreceptor cell differentiation (GO:0060219)	33	2	0.17	+	11.9	0.0136	0.441
pigment cell differentiation (GO:0050931)	33	2	0.17	+	11.9	0.0136	0.44
positive regulation of microtubule polymerization or depolymerization (GO:0031112)	33	2	0.17	+	11.9	0.0136	0.439
hair follicle morphogenesis (GO:0031069)	33	2	0.17	+	11.9	0.0136	0.438
neuron recognition (GO:0008038)	51	3	0.26	+	11.55	0.0026	0.156
positive regulation of glycogen biosynthetic process (GO:0045725)	17	1	0.09	+	11.55	0.0874	1
startle response (GO:0001964)	34	2	0.17	+	11.55	0.0143	0.456
ubiquinone biosynthetic process (GO:0006744)	17	1	0.09	+	11.55	0.0874	1
locomotor rhythm (GO:0045475)	17	1	0.09	+	11.55	0.0874	1
metanephric tubule development (GO:0072170)	17	1	0.09	+	11.55	0.0874	1
phosphatidylserine metabolic process (GO:0006658)	17	1	0.09	+	11.55	0.0874	1
Schwann cell development (GO:0014044)	34	2	0.17	+	11.55	0.0143	0.455
glial cell proliferation (GO:0014009)	17	1	0.09	+	11.55	0.0874	1
quinone biosynthetic process (GO:1901663)	17	1	0.09	+	11.55	0.0874	0.999
positive regulation of calcineurin-NFAT signaling cascade (GO:0070886)	17	1	0.09	+	11.55	0.0874	0.998
positive regulation of phosphoprotein phosphatase activity (GO:0032516)	17	1	0.09	+	11.55	0.0874	0.998
forebrain morphogenesis (GO:0048853)	17	1	0.09	+	11.55	0.0874	0.997
negative regulation of neurotransmitter transport (GO:0051589)	17	1	0.09	+	11.55	0.0874	0.996
regulation of neurotransmitter uptake (GO:0051580)	17	1	0.09	+	11.55	0.0874	0.996
regulation of astrocyte differentiation (GO:0048710)	34	2	0.17	+	11.55	0.0143	0.454
regulation of cell-cell adhesion mediated by cadherin (GO:2000047)	17	1	0.09	+	11.55	0.0874	0.995
cellular response to leptin stimulus (GO:0044320)	17	1	0.09	+	11.55	0.0874	0.994
positive regulation of calcineurin-mediated signaling (GO:0106058)	17	1	0.09	+	11.55	0.0874	0.993
positive regulation of actin nucleation (GO:0051127)	17	1	0.09	+	11.55	0.0874	0.993
postsynapse assembly (GO:0099068)	17	1	0.09	+	11.55	0.0874	0.992
clathrin coat assembly (GO:0048268)	17	1	0.09	+	11.55	0.0874	0.991
regulation of long-term synaptic depression (GO:1900452)	17	1	0.09	+	11.55	0.0874	0.991
cellular response to amyloid-beta (GO:1904646)	34	2	0.17	+	11.55	0.0143	0.453
regulation of amyloid-beta clearance (GO:1900221)	17	1	0.09	+	11.55	0.0874	0.99
axon regeneration (GO:0031103)	17	1	0.09	+	11.55	0.0874	0.989
positive regulation of protein export from nucleus (GO:0046827)	17	1	0.09	+	11.55	0.0874	0.988
regulation of cGMP-mediated signaling (GO:0010752)	17	1	0.09	+	11.55	0.0874	0.988
response to cadmium ion (GO:0046686)	34	2	0.17	+	11.55	0.0143	0.452
negative regulation of muscle hypertrophy (GO:0014741)	34	2	0.17	+	11.55	0.0143	0.452
forebrain neuron development (GO:0021884)	34	2	0.17	+	11.55	0.0143	0.451
salivary gland development (GO:0007431)	35	2	0.18	+	11.22	0.0151	0.467
eye photoreceptor cell differentiation (GO:0001754)	53	3	0.27	+	11.11	0.00289	0.173
phosphate ion transport (GO:0006817)	18	1	0.09	+	10.91	0.0921	1
regulation of podosome assembly (GO:0071801)	18	1	0.09	+	10.91	0.0921	1
metanephric nephron morphogenesis (GO:0072273)	18	1	0.09	+	10.91	0.0921	1
ventral spinal cord interneuron differentiation (GO:0021514)	18	1	0.09	+	10.91	0.0921	1
negative regulation of lipase activity (GO:0060192)	18	1	0.09	+	10.91	0.0921	1
positive regulation of CREB transcription factor activity (GO:0032793)	18	1	0.09	+	10.91	0.0921	1
melanosome organization (GO:0032438)	18	1	0.09	+	10.91	0.0921	1
regulation of chromatin silencing (GO:0031935)	18	1	0.09	+	10.91	0.0921	1
negative regulation of neuron projection regeneration (GO:0070571)	18	1	0.09	+	10.91	0.0921	1
regulation of axon regeneration (GO:0048679)	36	2	0.18	+	10.91	0.0159	0.442
axon extension (GO:0048675)	36	2	0.18	+	10.91	0.0159	0.441
neuron fate specification (GO:0048665)	36	2	0.18	+	10.91	0.0159	0.44
postsynaptic modulation of chemical synaptic transmission (GO:0099170)	18	1	0.09	+	10.91	0.0921	1
negative regulation of cytokine secretion (GO:0050710)	18	1	0.09	+	10.91	0.0921	1
positive regulation of cardiocyte differentiation (GO:1905209)	18	1	0.09	+	10.91	0.0921	1
regulation of vascular associated smooth muscle cell proliferation (GO:1904705)	54	3	0.28	+	10.91	0.00304	0.177
ovulation (GO:0030728)	18	1	0.09	+	10.91	0.0921	1
regulation of cell fate specification (GO:0042659)	18	1	0.09	+	10.91	0.0921	1
ncRNA 5'-end processing (GO:0034471)	18	1	0.09	+	10.91	0.0921	1
vascular associated smooth muscle contraction (GO:0014829)	18	1	0.09	+	10.91	0.0921	1
dendritic spine organization (GO:0097061)	36	2	0.18	+	10.91	0.0159	0.439
negative regulation of striated muscle tissue development (GO:0045843)	18	1	0.09	+	10.91	0.0921	1
regulation of intrinsic apoptotic signaling pathway in response to DNA damage (GO:1902229)	37	2	0.19	+	10.61	0.0167	0.459
proximal/distal pattern formation (GO:0009954)	37	2	0.19	+	10.61	0.0167	0.458
dendritic spine development (GO:0060996)	37	2	0.19	+	10.61	0.0167	0.457
dendrite morphogenesis (GO:0048813)	75	4	0.38	+	10.47	0.000701	0.0611
regulation of ventricular cardiac muscle cell membrane repolarization (GO:0060307)	19	1	0.1	+	10.33	0.0967	1
specification of animal organ identity (GO:0010092)	19	1	0.1	+	10.33	0.0967	1
response to amphetamine (GO:0001975)	19	1	0.1	+	10.33	0.0967	1
regulation of cardiac muscle cell differentiation (GO:2000725)	19	1	0.1	+	10.33	0.0967	1
metanephric epithelium development (GO:0072207)	19	1	0.1	+	10.33	0.0967	1
ubiquinone metabolic process (GO:0006743)	19	1	0.1	+	10.33	0.0967	1
mast cell activation involved in immune response (GO:0002279)	19	1	0.1	+	10.33	0.0967	1
nephron tubule formation (GO:0072079)	19	1	0.1	+	10.33	0.0967	1
glandular epithelial cell development (GO:0002068)	19	1	0.1	+	10.33	0.0967	1
positive regulation of intracellular steroid hormone receptor signaling pathway (GO:0033145)	19	1	0.1	+	10.33	0.0967	1
positive regulation of glycogen metabolic process (GO:0070875)	19	1	0.1	+	10.33	0.0967	1
pigment granule organization (GO:0048753)	19	1	0.1	+	10.33	0.0967	1
epidermis morphogenesis (GO:0048730)	38	2	0.19	+	10.33	0.0175	0.474
negative regulation of astrocyte differentiation (GO:0048712)	19	1	0.1	+	10.33	0.0967	1
positive regulation of protein localization to cell surface (GO:2000010)	19	1	0.1	+	10.33	0.0967	1
regulation of myelination (GO:0031641)	57	3	0.29	+	10.33	0.00351	0.195
macrophage migration (GO:1905517)	19	1	0.1	+	10.33	0.0967	1
response to pain (GO:0048265)	38	2	0.19	+	10.33	0.0175	0.473
mast cell degranulation (GO:0043303)	19	1	0.1	+	10.33	0.0967	1
oligosaccharide metabolic process (GO:0009311)	38	2	0.19	+	10.33	0.0175	0.473
peptide hormone processing (GO:0016486)	19	1	0.1	+	10.33	0.0967	1
ubiquitin-dependent protein catabolic process via the multivesicular body sorting pathway (GO:0043162)	19	1	0.1	+	10.33	0.0967	1
regulation of GTP binding (GO:1904424)	19	1	0.1	+	10.33	0.0967	1
negative regulation of anion transmembrane transport (GO:1903960)	19	1	0.1	+	10.33	0.0967	1
positive regulation of epithelial cell apoptotic process (GO:1904037)	38	2	0.19	+	10.33	0.0175	0.472
ether lipid metabolic process (GO:0046485)	19	1	0.1	+	10.33	0.0967	1
positive regulation of fatty acid oxidation (GO:0046321)	19	1	0.1	+	10.33	0.0967	1
positive regulation of myeloid leukocyte cytokine production involved in immune response (GO:0061081)	19	1	0.1	+	10.33	0.0967	1
negative regulation of membrane potential (GO:0045837)	19	1	0.1	+	10.33	0.0967	1
astrocyte differentiation (GO:0048708)	58	3	0.3	+	10.15	0.00368	0.203
Schwann cell differentiation (GO:0014037)	39	2	0.2	+	10.07	0.0184	0.491
vasodilation (GO:0042311)	39	2	0.2	+	10.07	0.0184	0.49
long-term synaptic potentiation (GO:0060291)	59	3	0.3	+	9.98	0.00386	0.207
branching involved in salivary gland morphogenesis (GO:0060445)	20	1	0.1	+	9.82	0.101	1
mast cell mediated immunity (GO:0002448)	20	1	0.1	+	9.82	0.101	1
regulation of feeding behavior (GO:0060259)	40	2	0.2	+	9.82	0.0192	0.505
positive regulation of glial cell proliferation (GO:0060252)	20	1	0.1	+	9.82	0.101	1
vocalization behavior (GO:0071625)	20	1	0.1	+	9.82	0.101	1
cell-cell junction maintenance (GO:0045217)	20	1	0.1	+	9.82	0.101	1
RNA 5'-end processing (GO:0000966)	20	1	0.1	+	9.82	0.101	1
regulation of establishment of cell polarity (GO:2000114)	20	1	0.1	+	9.82	0.101	1
response to leptin (GO:0044321)	20	1	0.1	+	9.82	0.101	1
regulation of neuron projection regeneration (GO:0070570)	40	2	0.2	+	9.82	0.0192	0.504
negative regulation of muscle organ development (GO:0048635)	20	1	0.1	+	9.82	0.101	1
embryonic digestive tract morphogenesis (GO:0048557)	20	1	0.1	+	9.82	0.101	1
positive regulation of behavior (GO:0048520)	40	2	0.2	+	9.82	0.0192	0.504
actin-mediated cell contraction (GO:0070252)	60	3	0.31	+	9.82	0.00403	0.216
plasma membrane phospholipid scrambling (GO:0017121)	20	1	0.1	+	9.82	0.101	1
CD4-positive or CD8-positive, alpha-beta T cell lineage commitment (GO:0043369)	20	1	0.1	+	9.82	0.101	1
response to amyloid-beta (GO:1904645)	40	2	0.2	+	9.82	0.0192	0.503
calcium-mediated signaling using intracellular calcium source (GO:0035584)	20	1	0.1	+	9.82	0.101	1
intrinsic apoptotic signaling pathway in response to oxidative stress (GO:0008631)	20	1	0.1	+	9.82	0.101	1
photoreceptor cell development (GO:0042461)	60	3	0.31	+	9.82	0.00403	0.215
positive regulation of fibroblast migration (GO:0010763)	20	1	0.1	+	9.82	0.101	1
type B pancreatic cell differentiation (GO:0003309)	20	1	0.1	+	9.82	0.101	1
negative regulation of smooth muscle contraction (GO:0045986)	20	1	0.1	+	9.82	0.101	1
adult behavior (GO:0030534)	181	9	0.92	+	9.76	5.44e-07	0.00022
inner ear receptor cell development (GO:0060119)	61	3	0.31	+	9.66	0.00422	0.222
regulation of renal system process (GO:0098801)	41	2	0.21	+	9.58	0.0201	0.517
energy homeostasis (GO:0097009)	41	2	0.21	+	9.58	0.0201	0.516
lung alveolus development (GO:0048286)	62	3	0.32	+	9.5	0.00441	0.229
positive regulation of smooth muscle cell migration (GO:0014911)	62	3	0.32	+	9.5	0.00441	0.229
neuron migration (GO:0001764)	146	7	0.74	+	9.41	1.31e-05	0.00255
neural tube patterning (GO:0021532)	42	2	0.21	+	9.35	0.021	0.496
glycerol ether metabolic process (GO:0006662)	21	1	0.11	+	9.35	0.106	1
negative regulation of amino acid transport (GO:0051956)	21	1	0.11	+	9.35	0.106	1
response to amine (GO:0014075)	21	1	0.11	+	9.35	0.106	1
regulation of anoikis (GO:2000209)	21	1	0.11	+	9.35	0.106	1
positive regulation of multicellular organism growth (GO:0040018)	42	2	0.21	+	9.35	0.021	0.495
cellular carbohydrate catabolic process (GO:0044275)	21	1	0.11	+	9.35	0.106	1
detection of mechanical stimulus involved in sensory perception of sound (GO:0050910)	21	1	0.11	+	9.35	0.106	1
positive regulation of monocyte chemotaxis (GO:0090026)	21	1	0.11	+	9.35	0.106	1
post-translational protein modification (GO:0043687)	21	1	0.11	+	9.35	0.106	1
response to muscle stretch (GO:0035994)	21	1	0.11	+	9.35	0.106	1
presynapse assembly (GO:0099054)	21	1	0.11	+	9.35	0.106	1
barbed-end actin filament capping (GO:0051016)	21	1	0.11	+	9.35	0.106	1
mitochondrion transport along microtubule (GO:0047497)	21	1	0.11	+	9.35	0.106	1
neuron maturation (GO:0042551)	42	2	0.21	+	9.35	0.021	0.495
positive regulation of dendrite development (GO:1900006)	21	1	0.11	+	9.35	0.106	1
protein localization to cell-cell junction (GO:0150105)	21	1	0.11	+	9.35	0.106	1
regulation of fibroblast migration (GO:0010762)	42	2	0.21	+	9.35	0.021	0.494
establishment of mitochondrion localization, microtubule-mediated (GO:0034643)	21	1	0.11	+	9.35	0.106	1
cellular modified amino acid catabolic process (GO:0042219)	21	1	0.11	+	9.35	0.106	1
negative regulation of response to endoplasmic reticulum stress (GO:1903573)	42	2	0.21	+	9.35	0.021	0.493
regulation of dopamine metabolic process (GO:0042053)	21	1	0.11	+	9.35	0.106	1
response to acidic pH (GO:0010447)	21	1	0.11	+	9.35	0.106	1
positive regulation of translational initiation (GO:0045948)	21	1	0.11	+	9.35	0.106	1
mechanoreceptor differentiation (GO:0042490)	85	4	0.43	+	9.24	0.0011	0.086
synapse assembly (GO:0007416)	86	4	0.44	+	9.13	0.00114	0.0884
oligodendrocyte development (GO:0014003)	43	2	0.22	+	9.13	0.0219	0.51
positive regulation of smooth muscle cell proliferation (GO:0048661)	108	5	0.55	+	9.09	0.000278	0.0294
positive regulation of Notch signaling pathway (GO:0045747)	44	2	0.22	+	8.92	0.0228	0.525
regulation of glial cell differentiation (GO:0045685)	88	4	0.45	+	8.92	0.00124	0.0932
positive regulation of extracellular matrix organization (GO:1903055)	22	1	0.11	+	8.92	0.11	1
dorsal spinal cord development (GO:0021516)	22	1	0.11	+	8.92	0.11	1
glycoprotein catabolic process (GO:0006516)	22	1	0.11	+	8.92	0.11	1
signaling receptor ligand precursor processing (GO:0140448)	22	1	0.11	+	8.92	0.11	1
positive regulation of endothelial cell apoptotic process (GO:2000353)	22	1	0.11	+	8.92	0.11	1
neural nucleus development (GO:0048857)	22	1	0.11	+	8.92	0.11	1
purine nucleobase metabolic process (GO:0006144)	22	1	0.11	+	8.92	0.11	1
positive regulation of skeletal muscle tissue development (GO:0048643)	22	1	0.11	+	8.92	0.11	1
positive regulation of myelination (GO:0031643)	22	1	0.11	+	8.92	0.11	1
developmental pigmentation (GO:0048066)	44	2	0.22	+	8.92	0.0228	0.524
regulation of synaptic vesicle endocytosis (GO:1900242)	22	1	0.11	+	8.92	0.11	1
regulation of glial cell migration (GO:1903975)	22	1	0.11	+	8.92	0.11	1
cell-cell signaling involved in cardiac conduction (GO:0086019)	22	1	0.11	+	8.92	0.11	1
autophagosome maturation (GO:0097352)	22	1	0.11	+	8.92	0.11	1
negative regulation of viral entry into host cell (GO:0046597)	22	1	0.11	+	8.92	0.11	1
negative regulation of smooth muscle cell migration (GO:0014912)	22	1	0.11	+	8.92	0.11	1
phasic smooth muscle contraction (GO:0014821)	22	1	0.11	+	8.92	0.11	1
morphogenesis of an epithelial fold (GO:0060571)	22	1	0.11	+	8.92	0.11	1
columnar/cuboidal epithelial cell development (GO:0002066)	67	3	0.34	+	8.79	0.00542	0.266
prostate gland development (GO:0030850)	45	2	0.23	+	8.73	0.0237	0.542
inner ear auditory receptor cell differentiation (GO:0042491)	45	2	0.23	+	8.73	0.0237	0.541
fibroblast growth factor receptor signaling pathway (GO:0008543)	45	2	0.23	+	8.73	0.0237	0.54
myelination (GO:0042552)	114	5	0.58	+	8.61	0.000353	0.0354
head morphogenesis (GO:0060323)	46	2	0.23	+	8.54	0.0247	0.559
diencephalon development (GO:0021536)	69	3	0.35	+	8.54	0.00586	0.279
negative regulation of stem cell differentiation (GO:2000737)	23	1	0.12	+	8.54	0.115	1
positive regulation of superoxide anion generation (GO:0032930)	23	1	0.12	+	8.54	0.115	1
cellular response to pH (GO:0071467)	23	1	0.12	+	8.54	0.115	1
glandular epithelial cell differentiation (GO:0002067)	46	2	0.23	+	8.54	0.0247	0.558
glycosyl compound biosynthetic process (GO:1901659)	23	1	0.12	+	8.54	0.115	1
regulation of cardiac muscle cell membrane repolarization (GO:0099623)	23	1	0.12	+	8.54	0.115	1
neuron projection extension (GO:1990138)	69	3	0.35	+	8.54	0.00586	0.278
enteroendocrine cell differentiation (GO:0035883)	23	1	0.12	+	8.54	0.115	1
positive regulation of transcription from RNA polymerase II promoter in response to stress (GO:0036003)	23	1	0.12	+	8.54	0.115	1
response to auditory stimulus (GO:0010996)	23	1	0.12	+	8.54	0.115	1
C4-dicarboxylate transport (GO:0015740)	23	1	0.12	+	8.54	0.115	1
indole-containing compound metabolic process (GO:0042430)	23	1	0.12	+	8.54	0.115	1
regulation of triglyceride biosynthetic process (GO:0010866)	23	1	0.12	+	8.54	0.115	1
thyroid hormone metabolic process (GO:0042403)	23	1	0.12	+	8.54	0.115	1
cGMP-mediated signaling (GO:0019934)	23	1	0.12	+	8.54	0.115	1
signal transduction involved in regulation of gene expression (GO:0023019)	23	1	0.12	+	8.54	0.115	1
amyloid-beta clearance (GO:0097242)	23	1	0.12	+	8.54	0.115	1
regulation of catecholamine metabolic process (GO:0042069)	23	1	0.12	+	8.54	0.115	1
ammonium ion metabolic process (GO:0097164)	23	1	0.12	+	8.54	0.115	1
positive regulation of transcription by RNA polymerase I (GO:0045943)	23	1	0.12	+	8.54	0.115	1
plasma lipoprotein particle remodeling (GO:0034369)	23	1	0.12	+	8.54	0.115	1
protein-lipid complex remodeling (GO:0034368)	23	1	0.12	+	8.54	0.115	1
negative regulation of regulated secretory pathway (GO:1903306)	23	1	0.12	+	8.54	0.115	1
glial cell development (GO:0021782)	116	5	0.59	+	8.46	0.000381	0.0366
ensheathment of neurons (GO:0007272)	117	5	0.6	+	8.39	0.000395	0.0376
axon ensheathment (GO:0008366)	117	5	0.6	+	8.39	0.000395	0.0374
peripheral nervous system development (GO:0007422)	71	3	0.36	+	8.3	0.00633	0.294
central nervous system neuron differentiation (GO:0021953)	215	9	1.1	+	8.22	2.14e-06	0.000625
negative regulation of oxidative stress-induced neuron death (GO:1903204)	24	1	0.12	+	8.18	0.119	1
response to X-ray (GO:0010165)	24	1	0.12	+	8.18	0.119	1
cellular zinc ion homeostasis (GO:0006882)	24	1	0.12	+	8.18	0.119	1
subpallium development (GO:0021544)	24	1	0.12	+	8.18	0.119	1
catechol-containing compound biosynthetic process (GO:0009713)	24	1	0.12	+	8.18	0.119	1
cell death in response to oxidative stress (GO:0036473)	24	1	0.12	+	8.18	0.119	1
negative regulation of defense response to virus (GO:0050687)	24	1	0.12	+	8.18	0.119	1
response to interferon-alpha (GO:0035455)	24	1	0.12	+	8.18	0.119	1
catecholamine biosynthetic process (GO:0042423)	24	1	0.12	+	8.18	0.119	1
exocrine system development (GO:0035272)	48	2	0.24	+	8.18	0.0266	0.562
metanephros morphogenesis (GO:0003338)	24	1	0.12	+	8.18	0.119	1
neuronal stem cell population maintenance (GO:0097150)	24	1	0.12	+	8.18	0.119	1
gland morphogenesis (GO:0022612)	121	5	0.62	+	8.11	0.000459	0.0423
photoreceptor cell differentiation (GO:0046530)	73	3	0.37	+	8.07	0.00681	0.31
limbic system development (GO:0021761)	98	4	0.5	+	8.01	0.00181	0.12
mitochondrion localization (GO:0051646)	49	2	0.25	+	8.01	0.0276	0.581
CD4-positive, alpha-beta T cell activation (GO:0035710)	49	2	0.25	+	8.01	0.0276	0.58
synapse organization (GO:0050808)	295	12	1.5	+	7.99	5.33e-08	3.37e-05
regulation of cyclin-dependent protein serine/threonine kinase activity (GO:0000079)	74	3	0.38	+	7.96	0.00706	0.318
regulation of muscle hypertrophy (GO:0014743)	74	3	0.38	+	7.96	0.00706	0.317
fat cell differentiation (GO:0045444)	124	5	0.63	+	7.92	0.000511	0.046
cardiac muscle contraction (GO:0060048)	75	3	0.38	+	7.85	0.00732	0.323
positive regulation of gliogenesis (GO:0014015)	75	3	0.38	+	7.85	0.00732	0.323
negative regulation of hydrogen peroxide-induced cell death (GO:1903206)	25	1	0.13	+	7.85	0.124	1
ether metabolic process (GO:0018904)	25	1	0.13	+	7.85	0.124	1
positive regulation of glial cell differentiation (GO:0045687)	50	2	0.25	+	7.85	0.0286	0.598
trabecula formation (GO:0060343)	25	1	0.13	+	7.85	0.124	1
spinal cord dorsal/ventral patterning (GO:0021513)	25	1	0.13	+	7.85	0.124	1
trophectodermal cell differentiation (GO:0001829)	25	1	0.13	+	7.85	0.124	1
plasma membrane organization (GO:0007009)	100	4	0.51	+	7.85	0.00195	0.128
regulation of establishment or maintenance of cell polarity (GO:0032878)	25	1	0.13	+	7.85	0.124	1
positive regulation of interleukin-4 production (GO:0032753)	25	1	0.13	+	7.85	0.124	1
negative regulation of intrinsic apoptotic signaling pathway in response to DNA damage (GO:1902230)	25	1	0.13	+	7.85	0.124	1
negative regulation of interleukin-2 production (GO:0032703)	25	1	0.13	+	7.85	0.124	1
glycogen metabolic process (GO:0005977)	50	2	0.25	+	7.85	0.0286	0.597
response to misfolded protein (GO:0051788)	25	1	0.13	+	7.85	0.124	1
negative regulation of phosphoprotein phosphatase activity (GO:0032515)	25	1	0.13	+	7.85	0.124	1
establishment of mitochondrion localization (GO:0051654)	25	1	0.13	+	7.85	0.124	1
positive regulation of multi-organism process (GO:0043902)	25	1	0.13	+	7.85	0.124	1
regulation of non-canonical Wnt signaling pathway (GO:2000050)	25	1	0.13	+	7.85	0.124	1
cellular glucan metabolic process (GO:0006073)	50	2	0.25	+	7.85	0.0286	0.596
negative regulation of phagocytosis (GO:0050765)	25	1	0.13	+	7.85	0.124	1
presynapse organization (GO:0099172)	25	1	0.13	+	7.85	0.124	1
glucan metabolic process (GO:0044042)	50	2	0.25	+	7.85	0.0286	0.595
regulation of insulin-like growth factor receptor signaling pathway (GO:0043567)	25	1	0.13	+	7.85	0.124	1
negative regulation of response to reactive oxygen species (GO:1901032)	25	1	0.13	+	7.85	0.124	1
behavioral response to pain (GO:0048266)	25	1	0.13	+	7.85	0.124	1
positive regulation of protein processing (GO:0010954)	25	1	0.13	+	7.85	0.124	1
negative regulation of viral life cycle (GO:1903901)	25	1	0.13	+	7.85	0.124	1
membrane depolarization during action potential (GO:0086010)	25	1	0.13	+	7.85	0.124	1
regulation of establishment of protein localization to mitochondrion (GO:1903747)	25	1	0.13	+	7.85	0.124	1
response to copper ion (GO:0046688)	25	1	0.13	+	7.85	0.124	1
protein-containing complex remodeling (GO:0034367)	25	1	0.13	+	7.85	0.124	1
axonogenesis (GO:0007409)	352	14	1.79	+	7.81	5.05e-09	3.8e-06
neuron projection morphogenesis (GO:0048812)	483	19	2.46	+	7.72	8.38e-12	1.89e-08
positive regulation of axonogenesis (GO:0050772)	102	4	0.52	+	7.7	0.00209	0.133
axon development (GO:0061564)	383	15	1.95	+	7.69	1.68e-09	1.39e-06
plasma membrane bounded cell projection morphogenesis (GO:0120039)	488	19	2.49	+	7.64	9.94e-12	1.96e-08
inner ear receptor cell differentiation (GO:0060113)	78	3	0.4	+	7.55	0.00812	0.347
cell projection morphogenesis (GO:0048858)	494	19	2.52	+	7.55	1.22e-11	2.14e-08
neuron fate commitment (GO:0048663)	78	3	0.4	+	7.55	0.00812	0.346
regulation of cyclin-dependent protein kinase activity (GO:1904029)	78	3	0.4	+	7.55	0.00812	0.345
basement membrane organization (GO:0071711)	26	1	0.13	+	7.55	0.128	1
positive regulation of transcription regulatory region DNA binding (GO:2000679)	26	1	0.13	+	7.55	0.128	1
regulation of superoxide anion generation (GO:0032928)	26	1	0.13	+	7.55	0.128	1
synaptic membrane adhesion (GO:0099560)	26	1	0.13	+	7.55	0.128	1
transepithelial transport (GO:0070633)	26	1	0.13	+	7.55	0.128	1
positive regulation of muscle organ development (GO:0048636)	26	1	0.13	+	7.55	0.128	1
lens fiber cell differentiation (GO:0070306)	26	1	0.13	+	7.55	0.128	1
negative regulation of neuron apoptotic process (GO:0043524)	182	7	0.93	+	7.55	5.09e-05	0.0073
animal organ regeneration (GO:0031100)	26	1	0.13	+	7.55	0.128	1
zinc ion homeostasis (GO:0055069)	26	1	0.13	+	7.55	0.128	1
endocrine pancreas development (GO:0031018)	52	2	0.26	+	7.55	0.0307	0.59
hair cell differentiation (GO:0035315)	52	2	0.26	+	7.55	0.0307	0.589
muscle cell migration (GO:0014812)	26	1	0.13	+	7.55	0.128	1
positive regulation of striated muscle tissue development (GO:0045844)	26	1	0.13	+	7.55	0.128	1
cell morphogenesis involved in neuron differentiation (GO:0048667)	446	17	2.27	+	7.48	1.86e-10	2.45e-07
regulation of axonogenesis (GO:0050770)	185	7	0.94	+	7.43	5.62e-05	0.00785
cellular protein complex disassembly (GO:0043624)	53	2	0.27	+	7.41	0.0318	0.605
autonomic nervous system development (GO:0048483)	53	2	0.27	+	7.41	0.0318	0.604
regulation of microtubule polymerization (GO:0031113)	53	2	0.27	+	7.41	0.0318	0.603
positive regulation of glucose transmembrane transport (GO:0010828)	53	2	0.27	+	7.41	0.0318	0.602
negative regulation of endothelial cell migration (GO:0010596)	53	2	0.27	+	7.41	0.0318	0.602
developmental growth involved in morphogenesis (GO:0060560)	134	5	0.68	+	7.33	0.000717	0.0618
locomotory behavior (GO:0007626)	242	9	1.23	+	7.3	5.41e-06	0.0012
regulation of neuron apoptotic process (GO:0043523)	269	10	1.37	+	7.3	1.6e-06	0.000536
mammary gland morphogenesis (GO:0060443)	54	2	0.28	+	7.27	0.0328	0.618
spinal cord patterning (GO:0021511)	27	1	0.14	+	7.27	0.133	1
T cell lineage commitment (GO:0002360)	27	1	0.14	+	7.27	0.133	1
regulation of protein localization to synapse (GO:1902473)	27	1	0.14	+	7.27	0.133	1
positive regulation of mononuclear cell migration (GO:0071677)	27	1	0.14	+	7.27	0.133	1
positive regulation of muscle tissue development (GO:1901863)	27	1	0.14	+	7.27	0.133	1
regulation of muscle tissue development (GO:1901861)	54	2	0.28	+	7.27	0.0328	0.617
positive regulation of neuroblast proliferation (GO:0002052)	27	1	0.14	+	7.27	0.133	1
mRNA splice site selection (GO:0006376)	27	1	0.14	+	7.27	0.133	1
positive regulation of neutrophil chemotaxis (GO:0090023)	27	1	0.14	+	7.27	0.133	1
cleavage involved in rRNA processing (GO:0000469)	27	1	0.14	+	7.27	0.133	1
regulation of urine volume (GO:0035809)	27	1	0.14	+	7.27	0.133	1
xenobiotic transport (GO:0042908)	27	1	0.14	+	7.27	0.133	1
thyroid gland development (GO:0030878)	27	1	0.14	+	7.27	0.133	1
labyrinthine layer morphogenesis (GO:0060713)	27	1	0.14	+	7.27	0.133	1
striated muscle adaptation (GO:0014888)	27	1	0.14	+	7.27	0.133	1
fluid transport (GO:0042044)	27	1	0.14	+	7.27	0.133	1
positive regulation of dendritic spine morphogenesis (GO:0061003)	27	1	0.14	+	7.27	0.133	1
positive regulation of protein maturation (GO:1903319)	27	1	0.14	+	7.27	0.133	1
clathrin-dependent endocytosis (GO:0072583)	27	1	0.14	+	7.27	0.133	1
positive regulation of neuron projection development (GO:0010976)	217	8	1.11	+	7.24	1.95e-05	0.0035
glial cell differentiation (GO:0010001)	191	7	0.97	+	7.2	6.83e-05	0.00945
cell part morphogenesis (GO:0032990)	520	19	2.65	+	7.17	2.85e-11	4.5e-08
positive regulation of axon extension (GO:0045773)	55	2	0.28	+	7.14	0.0339	0.633
negative regulation of osteoblast differentiation (GO:0045668)	55	2	0.28	+	7.14	0.0339	0.632
regulation of endothelial cell apoptotic process (GO:2000351)	55	2	0.28	+	7.14	0.0339	0.631
positive regulation of stress fiber assembly (GO:0051496)	55	2	0.28	+	7.14	0.0339	0.63
positive regulation of dendrite morphogenesis (GO:0050775)	55	2	0.28	+	7.14	0.0339	0.63
positive regulation of striated muscle cell differentiation (GO:0051155)	55	2	0.28	+	7.14	0.0339	0.629
regulation of dendritic spine morphogenesis (GO:0061001)	55	2	0.28	+	7.14	0.0339	0.628
positive regulation of mitotic cell cycle phase transition (GO:1901992)	84	3	0.43	+	7.01	0.00987	0.398
dicarboxylic acid transport (GO:0006835)	56	2	0.29	+	7.01	0.035	0.624
mast cell activation (GO:0045576)	28	1	0.14	+	7.01	0.137	1
positive regulation of cardiac muscle cell proliferation (GO:0060045)	28	1	0.14	+	7.01	0.137	1
intermediate filament organization (GO:0045109)	28	1	0.14	+	7.01	0.137	1
regulation of mast cell activation (GO:0033003)	56	2	0.29	+	7.01	0.035	0.623
regulation of hematopoietic progenitor cell differentiation (GO:1901532)	28	1	0.14	+	7.01	0.137	1
negative regulation of neural precursor cell proliferation (GO:2000178)	28	1	0.14	+	7.01	0.137	1
positive regulation of ubiquitin-protein transferase activity (GO:0051443)	28	1	0.14	+	7.01	0.137	1
regulation of mitochondrial fission (GO:0090140)	28	1	0.14	+	7.01	0.137	1
intestinal absorption (GO:0050892)	28	1	0.14	+	7.01	0.137	1
regulation of monocyte chemotaxis (GO:0090025)	28	1	0.14	+	7.01	0.137	1
leukocyte degranulation (GO:0043299)	28	1	0.14	+	7.01	0.137	1
positive regulation of viral life cycle (GO:1903902)	28	1	0.14	+	7.01	0.137	1
dopamine metabolic process (GO:0042417)	28	1	0.14	+	7.01	0.137	1
regulation of protein kinase A signaling (GO:0010738)	28	1	0.14	+	7.01	0.137	1
ketone biosynthetic process (GO:0042181)	28	1	0.14	+	7.01	0.137	1
actin filament polymerization (GO:0030041)	28	1	0.14	+	7.01	0.137	1
regulation of cell maturation (GO:1903429)	28	1	0.14	+	7.01	0.137	1
cerebral cortex neuron differentiation (GO:0021895)	28	1	0.14	+	7.01	0.137	1
response to nutrient (GO:0007584)	56	2	0.29	+	7.01	0.035	0.623
positive regulation of neurogenesis (GO:0050769)	282	10	1.44	+	6.96	2.4e-06	0.000677
regulation of smooth muscle cell migration (GO:0014910)	85	3	0.43	+	6.93	0.0102	0.364
body morphogenesis (GO:0010171)	57	2	0.29	+	6.89	0.0361	0.64
neural crest cell migration (GO:0001755)	57	2	0.29	+	6.89	0.0361	0.639
response to cAMP (GO:0051591)	57	2	0.29	+	6.89	0.0361	0.638
inner ear morphogenesis (GO:0042472)	114	4	0.58	+	6.89	0.00308	0.179
neural precursor cell proliferation (GO:0061351)	86	3	0.44	+	6.85	0.0105	0.374
axon guidance (GO:0007411)	231	8	1.18	+	6.8	3.01e-05	0.00485
heart contraction (GO:0060047)	87	3	0.44	+	6.77	0.0108	0.379
regulation of neuron death (GO:1901214)	377	13	1.92	+	6.77	9.25e-08	5.04e-05
cell differentiation in spinal cord (GO:0021515)	58	2	0.3	+	6.77	0.0372	0.657
positive regulation of granulocyte chemotaxis (GO:0071624)	29	1	0.15	+	6.77	0.141	1
protein hydroxylation (GO:0018126)	29	1	0.15	+	6.77	0.141	1
acetyl-CoA metabolic process (GO:0006084)	29	1	0.15	+	6.77	0.141	1
positive regulation of protein polymerization (GO:0032273)	116	4	0.59	+	6.77	0.00327	0.187
neuron projection guidance (GO:0097485)	232	8	1.18	+	6.77	3.1e-05	0.00494
positive regulation of organ growth (GO:0046622)	58	2	0.3	+	6.77	0.0372	0.656
isoprenoid biosynthetic process (GO:0008299)	29	1	0.15	+	6.77	0.141	1
epithelial cell apoptotic process (GO:1904019)	29	1	0.15	+	6.77	0.141	1
regulation of phospholipase activity (GO:0010517)	58	2	0.3	+	6.77	0.0372	0.655
glycerophospholipid catabolic process (GO:0046475)	29	1	0.15	+	6.77	0.141	1
regulation of cell growth involved in cardiac muscle cell development (GO:0061050)	29	1	0.15	+	6.77	0.141	1
outflow tract septum morphogenesis (GO:0003148)	29	1	0.15	+	6.77	0.141	1
lung morphogenesis (GO:0060425)	59	2	0.3	+	6.65	0.0384	0.673
regulation of embryonic development (GO:0045995)	59	2	0.3	+	6.65	0.0384	0.672
positive regulation of mitotic cell cycle (GO:0045931)	118	4	0.6	+	6.65	0.00347	0.194
neuron projection development (GO:0031175)	711	24	3.62	+	6.63	2.52e-13	1.99e-09
phenol-containing compound metabolic process (GO:0018958)	89	3	0.45	+	6.62	0.0115	0.394
regulation of gliogenesis (GO:0014013)	119	4	0.61	+	6.6	0.00357	0.198
postsynaptic membrane organization (GO:0001941)	30	1	0.15	+	6.54	0.146	1
metanephric nephron development (GO:0072210)	30	1	0.15	+	6.54	0.146	1
nuclear migration (GO:0007097)	30	1	0.15	+	6.54	0.146	1
regulation of translational initiation (GO:0006446)	60	2	0.31	+	6.54	0.0395	0.691
regulation of glycogen biosynthetic process (GO:0005979)	30	1	0.15	+	6.54	0.146	1
RNA phosphodiester bond hydrolysis, endonucleolytic (GO:0090502)	30	1	0.15	+	6.54	0.146	1
sensory perception of temperature stimulus (GO:0050951)	30	1	0.15	+	6.54	0.146	1
embryonic camera-type eye morphogenesis (GO:0048596)	30	1	0.15	+	6.54	0.146	1
aorta morphogenesis (GO:0035909)	30	1	0.15	+	6.54	0.146	1
positive regulation of receptor-mediated endocytosis (GO:0048260)	60	2	0.31	+	6.54	0.0395	0.69
regulation of cardiocyte differentiation (GO:1905207)	30	1	0.15	+	6.54	0.146	1
entrainment of circadian clock by photoperiod (GO:0043153)	30	1	0.15	+	6.54	0.146	1
regulation of glucan biosynthetic process (GO:0010962)	30	1	0.15	+	6.54	0.146	1
positive regulation of phosphatase activity (GO:0010922)	30	1	0.15	+	6.54	0.146	1
negative regulation of muscle contraction (GO:0045932)	30	1	0.15	+	6.54	0.146	1
regulation of synaptic vesicle recycling (GO:1903421)	30	1	0.15	+	6.54	0.146	1
postsynapse organization (GO:0099173)	90	3	0.46	+	6.54	0.0118	0.404
multicellular organismal response to stress (GO:0033555)	91	3	0.46	+	6.47	0.0122	0.408
regulation of dendrite morphogenesis (GO:0048814)	91	3	0.46	+	6.47	0.0122	0.407
telencephalon development (GO:0021537)	243	8	1.24	+	6.46	4.26e-05	0.00653
gliogenesis (GO:0042063)	243	8	1.24	+	6.46	4.26e-05	0.00646
energy reserve metabolic process (GO:0006112)	61	2	0.31	+	6.44	0.0407	0.682
cellular response to fibroblast growth factor stimulus (GO:0044344)	61	2	0.31	+	6.44	0.0407	0.681
actin filament bundle assembly (GO:0051017)	61	2	0.31	+	6.44	0.0407	0.68
actin filament-based movement (GO:0030048)	92	3	0.47	+	6.4	0.0125	0.412
positive regulation of developmental growth (GO:0048639)	216	7	1.1	+	6.36	0.000143	0.0175
regulation of membrane repolarization (GO:0060306)	31	1	0.16	+	6.33	0.15	1
positive regulation of collagen biosynthetic process (GO:0032967)	31	1	0.16	+	6.33	0.15	1
regulation of interleukin-4 production (GO:0032673)	31	1	0.16	+	6.33	0.15	1
regulation of viral release from host cell (GO:1902186)	31	1	0.16	+	6.33	0.15	1
regulation of skeletal muscle tissue development (GO:0048641)	31	1	0.16	+	6.33	0.15	1
photoperiodism (GO:0009648)	31	1	0.16	+	6.33	0.15	1
establishment of mitotic spindle orientation (GO:0000132)	31	1	0.16	+	6.33	0.15	1
negative regulation of cardiac muscle tissue growth (GO:0055022)	31	1	0.16	+	6.33	0.15	1
tRNA methylation (GO:0030488)	31	1	0.16	+	6.33	0.15	1
hormone biosynthetic process (GO:0042446)	31	1	0.16	+	6.33	0.15	1
negative regulation of exocytosis (GO:0045920)	31	1	0.16	+	6.33	0.15	1
negative regulation of heart growth (GO:0061117)	31	1	0.16	+	6.33	0.15	1
ventricular cardiac muscle tissue development (GO:0003229)	62	2	0.32	+	6.33	0.0419	0.694
negative regulation of response to oxidative stress (GO:1902883)	31	1	0.16	+	6.33	0.15	1
intrinsic apoptotic signaling pathway (GO:0097193)	155	5	0.79	+	6.33	0.00134	0.0978
positive regulation of nervous system development (GO:0051962)	343	11	1.75	+	6.3	1.89e-06	0.000585
regulation of epithelial cell apoptotic process (GO:1904035)	94	3	0.48	+	6.27	0.0132	0.431
positive regulation of supramolecular fiber organization (GO:1902905)	188	6	0.96	+	6.27	0.000469	0.0428
pallium development (GO:0021543)	157	5	0.8	+	6.25	0.00142	0.101
response to fibroblast growth factor (GO:0071774)	63	2	0.32	+	6.23	0.0431	0.709
positive regulation of neuron death (GO:1901216)	126	4	0.64	+	6.23	0.00435	0.227
positive regulation of dendritic spine development (GO:0060999)	63	2	0.32	+	6.23	0.0431	0.709
dorsal/ventral pattern formation (GO:0009953)	95	3	0.48	+	6.2	0.0136	0.438
columnar/cuboidal epithelial cell differentiation (GO:0002065)	127	4	0.65	+	6.18	0.00447	0.231
regulation of neurotransmitter transport (GO:0051588)	127	4	0.65	+	6.18	0.00447	0.231
forebrain development (GO:0030900)	382	12	1.95	+	6.17	7.75e-07	0.000298
positive regulation of cell morphogenesis involved in differentiation (GO:0010770)	96	3	0.49	+	6.14	0.014	0.448
secondary alcohol biosynthetic process (GO:1902653)	32	1	0.16	+	6.14	0.154	1
response to zinc ion (GO:0010043)	32	1	0.16	+	6.14	0.154	1
cellular component morphogenesis (GO:0032989)	608	19	3.1	+	6.14	3.68e-10	3.88e-07
cholesterol biosynthetic process (GO:0006695)	32	1	0.16	+	6.14	0.154	1
cellular response to leukemia inhibitory factor (GO:1990830)	128	4	0.65	+	6.14	0.00459	0.234
negative regulation of endothelial cell apoptotic process (GO:2000352)	32	1	0.16	+	6.14	0.154	1
regulation of superoxide metabolic process (GO:0090322)	32	1	0.16	+	6.14	0.154	1
regulation of smooth muscle cell differentiation (GO:0051150)	32	1	0.16	+	6.14	0.154	1
regulation of actin nucleation (GO:0051125)	32	1	0.16	+	6.14	0.154	1
muscle adaptation (GO:0043500)	32	1	0.16	+	6.14	0.154	1
entrainment of circadian clock (GO:0009649)	32	1	0.16	+	6.14	0.154	1
actin filament bundle organization (GO:0061572)	64	2	0.33	+	6.14	0.0443	0.725
microtubule polymerization (GO:0046785)	32	1	0.16	+	6.14	0.154	1
coronary vasculature morphogenesis (GO:0060977)	32	1	0.16	+	6.14	0.154	1
negative regulation of cardiac muscle hypertrophy (GO:0010614)	32	1	0.16	+	6.14	0.154	1
mammary gland epithelium development (GO:0061180)	64	2	0.33	+	6.14	0.0443	0.725
embryonic placenta morphogenesis (GO:0060669)	32	1	0.16	+	6.14	0.154	1
response to leukemia inhibitory factor (GO:1990823)	129	4	0.66	+	6.09	0.00472	0.238
hair follicle development (GO:0001942)	97	3	0.49	+	6.07	0.0144	0.45
epithelial cell proliferation (GO:0050673)	97	3	0.49	+	6.07	0.0144	0.45
regulation of smooth muscle cell proliferation (GO:0048660)	163	5	0.83	+	6.02	0.00167	0.113
positive regulation of cell cycle phase transition (GO:1901989)	98	3	0.5	+	6.01	0.0147	0.46
regulation of muscle adaptation (GO:0043502)	98	3	0.5	+	6.01	0.0147	0.459
regulation of dendrite development (GO:0050773)	131	4	0.67	+	5.99	0.00497	0.246
positive regulation of peptidyl-tyrosine phosphorylation (GO:0050731)	197	6	1	+	5.98	0.000595	0.0528
regulation of hydrogen peroxide-induced cell death (GO:1903205)	33	1	0.17	+	5.95	0.159	1
neuroblast proliferation (GO:0007405)	33	1	0.17	+	5.95	0.159	1
heart process (GO:0003015)	99	3	0.5	+	5.95	0.0151	0.429
acute-phase response (GO:0006953)	33	1	0.17	+	5.95	0.159	1
spinal cord development (GO:0021510)	99	3	0.5	+	5.95	0.0151	0.428
negative regulation of organic acid transport (GO:0032891)	33	1	0.17	+	5.95	0.159	1
positive regulation of response to endoplasmic reticulum stress (GO:1905898)	33	1	0.17	+	5.95	0.159	1
positive regulation of actin filament bundle assembly (GO:0032233)	66	2	0.34	+	5.95	0.0467	0.739
embryonic digestive tract development (GO:0048566)	33	1	0.17	+	5.95	0.159	1
regulation of striated muscle cell differentiation (GO:0051153)	99	3	0.5	+	5.95	0.0151	0.427
activation of MAPKK activity (GO:0000186)	33	1	0.17	+	5.95	0.159	1
cell communication involved in cardiac conduction (GO:0086065)	33	1	0.17	+	5.95	0.159	1
cardiac muscle cell action potential involved in contraction (GO:0086002)	33	1	0.17	+	5.95	0.159	1
regulation of protein export from nucleus (GO:0046825)	33	1	0.17	+	5.95	0.159	1
protein-containing complex disassembly (GO:0032984)	100	3	0.51	+	5.89	0.0155	0.436
skin epidermis development (GO:0098773)	100	3	0.51	+	5.89	0.0155	0.435
regeneration (GO:0031099)	100	3	0.51	+	5.89	0.0155	0.435
hair cycle process (GO:0022405)	100	3	0.51	+	5.89	0.0155	0.434
molting cycle process (GO:0022404)	100	3	0.51	+	5.89	0.0155	0.433
cellular response to amino acid stimulus (GO:0071230)	67	2	0.34	+	5.86	0.0479	0.756
neuroepithelial cell differentiation (GO:0060563)	67	2	0.34	+	5.86	0.0479	0.755
renal system process (GO:0003014)	101	3	0.51	+	5.83	0.0159	0.44
neuron development (GO:0048666)	876	26	4.46	+	5.83	3.81e-13	2e-09
ear morphogenesis (GO:0042471)	135	4	0.69	+	5.82	0.00551	0.266
cell morphogenesis (GO:0000902)	743	22	3.78	+	5.81	3.4e-11	4.88e-08
cell morphogenesis involved in differentiation (GO:0000904)	575	17	2.93	+	5.8	7.62e-09	5.46e-06
cell fate commitment (GO:0045165)	271	8	1.38	+	5.8	8.93e-05	0.0118
developmental cell growth (GO:0048588)	102	3	0.52	+	5.77	0.0163	0.45
telencephalon cell migration (GO:0022029)	68	2	0.35	+	5.77	0.0492	0.771
positive regulation of intrinsic apoptotic signaling pathway (GO:2001244)	68	2	0.35	+	5.77	0.0492	0.77
protein targeting to vacuole (GO:0006623)	34	1	0.17	+	5.77	0.163	1
leukocyte activation involved in inflammatory response (GO:0002269)	34	1	0.17	+	5.77	0.163	1
microglial cell activation (GO:0001774)	34	1	0.17	+	5.77	0.163	1
regulation of transcription by RNA polymerase I (GO:0006356)	34	1	0.17	+	5.77	0.163	1
endosome transport via multivesicular body sorting pathway (GO:0032509)	34	1	0.17	+	5.77	0.163	1
actin filament capping (GO:0051693)	34	1	0.17	+	5.77	0.163	1
positive regulation of leukocyte apoptotic process (GO:2000108)	34	1	0.17	+	5.77	0.163	1
regulation of cAMP-mediated signaling (GO:0043949)	68	2	0.35	+	5.77	0.0492	0.769
regulation of neutrophil chemotaxis (GO:0090022)	34	1	0.17	+	5.77	0.163	1
negative regulation of blood vessel endothelial cell migration (GO:0043537)	34	1	0.17	+	5.77	0.163	1
positive regulation of collagen metabolic process (GO:0010714)	34	1	0.17	+	5.77	0.163	1
amino acid import across plasma membrane (GO:0089718)	34	1	0.17	+	5.77	0.163	1
cell junction maintenance (GO:0034331)	34	1	0.17	+	5.77	0.163	1
dendrite development (GO:0016358)	137	4	0.7	+	5.73	0.00579	0.276
regulation of synaptic vesicle exocytosis (GO:2000300)	69	2	0.35	+	5.69	0.0504	0.752
neuromuscular process controlling balance (GO:0050885)	69	2	0.35	+	5.69	0.0504	0.751
neural retina development (GO:0003407)	69	2	0.35	+	5.69	0.0504	0.75
positive regulation of cytoskeleton organization (GO:0051495)	207	6	1.05	+	5.69	0.000765	0.0656
negative regulation of protein-containing complex assembly (GO:0031333)	139	4	0.71	+	5.65	0.00609	0.284
inner ear development (GO:0048839)	209	6	1.06	+	5.64	0.000803	0.0682
regulation of oxidative stress-induced neuron death (GO:1903203)	35	1	0.18	+	5.61	0.167	1
striated muscle contraction (GO:0006941)	105	3	0.53	+	5.61	0.0176	0.473
negative regulation of glial cell differentiation (GO:0045686)	35	1	0.18	+	5.61	0.167	1
membrane assembly (GO:0071709)	35	1	0.18	+	5.61	0.167	1
negative regulation of microtubule depolymerization (GO:0007026)	35	1	0.18	+	5.61	0.167	1
dopaminergic neuron differentiation (GO:0071542)	35	1	0.18	+	5.61	0.167	1
response to dietary excess (GO:0002021)	35	1	0.18	+	5.61	0.167	1
cellular response to cAMP (GO:0071320)	35	1	0.18	+	5.61	0.167	1
positive regulation of mast cell activation (GO:0033005)	35	1	0.18	+	5.61	0.167	1
establishment of mitotic spindle localization (GO:0040001)	35	1	0.18	+	5.61	0.167	1
establishment of epithelial cell polarity (GO:0090162)	35	1	0.18	+	5.61	0.167	1
response to axon injury (GO:0048678)	35	1	0.18	+	5.61	0.167	1
maturation of SSU-rRNA from tricistronic rRNA transcript (SSU-rRNA, 5.8S rRNA, LSU-rRNA) (GO:0000462)	35	1	0.18	+	5.61	0.167	1
cellular response to nerve growth factor stimulus (GO:1990090)	35	1	0.18	+	5.61	0.167	1
response to nerve growth factor (GO:1990089)	35	1	0.18	+	5.61	0.167	1
positive T cell selection (GO:0043368)	35	1	0.18	+	5.61	0.167	1
negative regulation of fibroblast proliferation (GO:0048147)	35	1	0.18	+	5.61	0.167	1
nucleobase metabolic process (GO:0009112)	35	1	0.18	+	5.61	0.167	1
negative regulation of transforming growth factor beta receptor signaling pathway (GO:0030512)	70	2	0.36	+	5.61	0.0517	0.765
regulation of heart rate by cardiac conduction (GO:0086091)	35	1	0.18	+	5.61	0.167	1
negative regulation of protein dephosphorylation (GO:0035308)	35	1	0.18	+	5.61	0.167	1
cellular modified amino acid biosynthetic process (GO:0042398)	35	1	0.18	+	5.61	0.167	1
regulation of cell fate commitment (GO:0010453)	35	1	0.18	+	5.61	0.167	1
regulation of muscle cell differentiation (GO:0051147)	141	4	0.72	+	5.57	0.00639	0.296
regulation of mitotic nuclear division (GO:0007088)	106	3	0.54	+	5.56	0.018	0.483
positive regulation of muscle cell differentiation (GO:0051149)	71	2	0.36	+	5.53	0.053	0.78
regulation of cardiac muscle hypertrophy (GO:0010611)	71	2	0.36	+	5.53	0.053	0.78
forebrain cell migration (GO:0021885)	71	2	0.36	+	5.53	0.053	0.779
cell junction organization (GO:0034330)	499	14	2.54	+	5.51	3.32e-07	0.00015
negative regulation of angiogenesis (GO:0016525)	107	3	0.55	+	5.5	0.0185	0.492
positive regulation of cell development (GO:0010720)	357	10	1.82	+	5.5	1.78e-05	0.00323
protein stabilization (GO:0050821)	179	5	0.91	+	5.48	0.00248	0.15
neuron differentiation (GO:0030182)	1079	30	5.5	+	5.46	2.1e-14	3.32e-10
negative regulation of neuron death (GO:1901215)	252	7	1.28	+	5.45	0.000356	0.0356
positive regulation of neutrophil migration (GO:1902624)	36	1	0.18	+	5.45	0.172	1
plasma lipoprotein particle organization (GO:0071827)	36	1	0.18	+	5.45	0.172	1
astrocyte development (GO:0014002)	36	1	0.18	+	5.45	0.172	1
quinone metabolic process (GO:1901661)	36	1	0.18	+	5.45	0.172	1
nucleus localization (GO:0051647)	36	1	0.18	+	5.45	0.172	1
positive regulation of cell cycle arrest (GO:0071158)	36	1	0.18	+	5.45	0.172	1
positive regulation of cytokine secretion (GO:0050715)	36	1	0.18	+	5.45	0.172	1
embryonic eye morphogenesis (GO:0048048)	36	1	0.18	+	5.45	0.172	1
hair cycle (GO:0042633)	108	3	0.55	+	5.45	0.0189	0.501
regulation of keratinocyte proliferation (GO:0010837)	36	1	0.18	+	5.45	0.172	1
molting cycle (GO:0042303)	108	3	0.55	+	5.45	0.0189	0.5
negative regulation of epithelial cell migration (GO:0010633)	72	2	0.37	+	5.45	0.0543	0.795
heart trabecula morphogenesis (GO:0061384)	36	1	0.18	+	5.45	0.172	1
motor neuron axon guidance (GO:0008045)	36	1	0.18	+	5.45	0.172	1
negative regulation of mitotic nuclear division (GO:0045839)	36	1	0.18	+	5.45	0.172	1
regulation of neurogenesis (GO:0050767)	433	12	2.21	+	5.44	2.75e-06	0.000748
negative regulation of blood vessel morphogenesis (GO:2000181)	109	3	0.56	+	5.4	0.0194	0.505
cerebral cortex development (GO:0021987)	109	3	0.56	+	5.4	0.0194	0.504
hippocampus development (GO:0021766)	73	2	0.37	+	5.38	0.0556	0.786
positive regulation of phosphatidylinositol 3-kinase signaling (GO:0014068)	73	2	0.37	+	5.38	0.0556	0.786
negative regulation of vasculature development (GO:1901343)	110	3	0.56	+	5.35	0.0198	0.512
spinal cord motor neuron differentiation (GO:0021522)	37	1	0.19	+	5.31	0.176	1
retina morphogenesis in camera-type eye (GO:0060042)	74	2	0.38	+	5.31	0.0569	0.802
positive regulation of mesenchymal cell proliferation (GO:0002053)	37	1	0.19	+	5.31	0.176	1
regulation of calcineurin-NFAT signaling cascade (GO:0070884)	37	1	0.19	+	5.31	0.176	1
regulation of glycogen metabolic process (GO:0070873)	37	1	0.19	+	5.31	0.176	1
establishment of spindle orientation (GO:0051294)	37	1	0.19	+	5.31	0.176	1
cortical actin cytoskeleton organization (GO:0030866)	37	1	0.19	+	5.31	0.176	1
regulation of neurotransmitter secretion (GO:0046928)	111	3	0.57	+	5.31	0.0203	0.484
regulation of sprouting angiogenesis (GO:1903670)	37	1	0.19	+	5.31	0.176	1
regulation of fatty acid oxidation (GO:0046320)	37	1	0.19	+	5.31	0.176	1
negative regulation of cellular amide metabolic process (GO:0034249)	148	4	0.75	+	5.31	0.00752	0.328
positive regulation of protein-containing complex assembly (GO:0031334)	223	6	1.14	+	5.28	0.00111	0.0865
regulation of G1/S transition of mitotic cell cycle (GO:2000045)	112	3	0.57	+	5.26	0.0208	0.494
negative regulation of protein depolymerization (GO:1901880)	75	2	0.38	+	5.24	0.0583	0.819
cellular polysaccharide metabolic process (GO:0044264)	75	2	0.38	+	5.24	0.0583	0.819
positive regulation of blood vessel diameter (GO:0097755)	75	2	0.38	+	5.24	0.0583	0.818
learning or memory (GO:0007611)	300	8	1.53	+	5.24	0.000176	0.0205
regulation of cell morphogenesis involved in differentiation (GO:0010769)	113	3	0.58	+	5.21	0.0212	0.497
memory (GO:0007613)	151	4	0.77	+	5.2	0.00805	0.345
multivesicular body sorting pathway (GO:0071985)	38	1	0.19	+	5.17	0.18	1
positive regulation of synaptic transmission, glutamatergic (GO:0051968)	38	1	0.19	+	5.17	0.18	1
negative regulation of amine transport (GO:0051953)	38	1	0.19	+	5.17	0.18	1
regulation of cellular amine metabolic process (GO:0033238)	38	1	0.19	+	5.17	0.18	1
peptidyl-proline modification (GO:0018208)	38	1	0.19	+	5.17	0.18	1
regulation of voltage-gated calcium channel activity (GO:1901385)	38	1	0.19	+	5.17	0.18	1
regulation of calcineurin-mediated signaling (GO:0106056)	38	1	0.19	+	5.17	0.18	1
autophagy of mitochondrion (GO:0000422)	38	1	0.19	+	5.17	0.18	1
intrinsic apoptotic signaling pathway in response to endoplasmic reticulum stress (GO:0070059)	38	1	0.19	+	5.17	0.18	1
G1/S transition of mitotic cell cycle (GO:0000082)	76	2	0.39	+	5.17	0.0596	0.809
regulation of microtubule depolymerization (GO:0031114)	38	1	0.19	+	5.17	0.18	1
mitochondrion disassembly (GO:0061726)	38	1	0.19	+	5.17	0.18	1
acidic amino acid transport (GO:0015800)	38	1	0.19	+	5.17	0.18	1
peptidyl-tyrosine dephosphorylation (GO:0035335)	38	1	0.19	+	5.17	0.18	1
cardiac muscle cell action potential (GO:0086001)	38	1	0.19	+	5.17	0.18	1
sterol biosynthetic process (GO:0016126)	38	1	0.19	+	5.17	0.18	1
vasoconstriction (GO:0042310)	38	1	0.19	+	5.17	0.18	1
cell growth (GO:0016049)	114	3	0.58	+	5.17	0.0217	0.507
regulation of response to endoplasmic reticulum stress (GO:1905897)	77	2	0.39	+	5.1	0.0609	0.824
regulation of cardiac muscle tissue growth (GO:0055021)	77	2	0.39	+	5.1	0.0609	0.824
positive regulation of neuron differentiation (GO:0045666)	116	3	0.59	+	5.08	0.0227	0.524
regulation of organ growth (GO:0046620)	116	3	0.59	+	5.08	0.0227	0.524
phenol-containing compound biosynthetic process (GO:0046189)	39	1	0.2	+	5.03	0.184	1
regulation of glial cell proliferation (GO:0060251)	39	1	0.2	+	5.03	0.184	1
regulation of polysaccharide biosynthetic process (GO:0032885)	39	1	0.2	+	5.03	0.184	1
cell cycle G1/S phase transition (GO:0044843)	78	2	0.4	+	5.03	0.0623	0.84
polysaccharide metabolic process (GO:0005976)	78	2	0.4	+	5.03	0.0623	0.839
regulation of protein localization to cell surface (GO:2000008)	39	1	0.2	+	5.03	0.184	1
positive regulation of calcium-mediated signaling (GO:0050850)	39	1	0.2	+	5.03	0.184	1
protein depolymerization (GO:0051261)	39	1	0.2	+	5.03	0.184	1
negative regulation of striated muscle cell differentiation (GO:0051154)	39	1	0.2	+	5.03	0.184	1
positive regulation of BMP signaling pathway (GO:0030513)	39	1	0.2	+	5.03	0.184	1
positive regulation of substrate adhesion-dependent cell spreading (GO:1900026)	39	1	0.2	+	5.03	0.184	1
positive regulation of cardiac muscle hypertrophy (GO:0010613)	39	1	0.2	+	5.03	0.184	1
pituitary gland development (GO:0021983)	39	1	0.2	+	5.03	0.184	1
mammary gland duct morphogenesis (GO:0060603)	39	1	0.2	+	5.03	0.184	1
positive regulation of cell projection organization (GO:0031346)	433	11	2.21	+	4.99	1.62e-05	0.00296
regulation of lipase activity (GO:0060191)	79	2	0.4	+	4.97	0.0637	0.855
positive regulation of cell division (GO:0051781)	79	2	0.4	+	4.97	0.0637	0.855
cellular response to acid chemical (GO:0071229)	79	2	0.4	+	4.97	0.0637	0.854
regulation of calcium-mediated signaling (GO:0050848)	79	2	0.4	+	4.97	0.0637	0.853
ear development (GO:0043583)	239	6	1.22	+	4.93	0.00157	0.11
regulation of neuroblast proliferation (GO:1902692)	40	1	0.2	+	4.91	0.188	1
protein-lipid complex subunit organization (GO:0071825)	40	1	0.2	+	4.91	0.188	1
smoothened signaling pathway (GO:0007224)	80	2	0.41	+	4.91	0.0651	0.849
positive regulation of synapse assembly (GO:0051965)	80	2	0.41	+	4.91	0.0651	0.849
positive regulation of ATPase activity (GO:0032781)	40	1	0.2	+	4.91	0.188	1
lens development in camera-type eye (GO:0002088)	80	2	0.41	+	4.91	0.0651	0.848
regulation of response to reactive oxygen species (GO:1901031)	40	1	0.2	+	4.91	0.188	1
positive regulation of calcium ion transmembrane transporter activity (GO:1901021)	40	1	0.2	+	4.91	0.188	1
regulation of anion transmembrane transport (GO:1903959)	40	1	0.2	+	4.91	0.188	1
positive regulation of muscle hypertrophy (GO:0014742)	40	1	0.2	+	4.91	0.188	1
negative regulation of neuron projection development (GO:0010977)	161	4	0.82	+	4.88	0.00997	0.398
response to amino acid (GO:0043200)	81	2	0.41	+	4.85	0.0665	0.863
regulation of synapse organization (GO:0050807)	245	6	1.25	+	4.81	0.00177	0.118
regulation of nervous system development (GO:0051960)	531	13	2.7	+	4.81	3.88e-06	0.000973
cell fate determination (GO:0001709)	41	1	0.21	+	4.79	0.192	1
neural crest cell development (GO:0014032)	82	2	0.42	+	4.79	0.0679	0.879
cellular pigmentation (GO:0033059)	41	1	0.21	+	4.79	0.192	1
regulation of establishment of planar polarity (GO:0090175)	41	1	0.21	+	4.79	0.192	1
animal organ formation (GO:0048645)	41	1	0.21	+	4.79	0.192	1
response to cold (GO:0009409)	41	1	0.21	+	4.79	0.192	1
negative regulation of actin filament depolymerization (GO:0030835)	41	1	0.21	+	4.79	0.192	1
platelet-derived growth factor receptor signaling pathway (GO:0048008)	41	1	0.21	+	4.79	0.192	1
amino acid import (GO:0043090)	41	1	0.21	+	4.79	0.192	1
positive regulation of protein dephosphorylation (GO:0035307)	41	1	0.21	+	4.79	0.192	1
regulation of dendritic spine development (GO:0060998)	82	2	0.42	+	4.79	0.0679	0.878
alpha-beta T cell activation (GO:0046631)	82	2	0.42	+	4.79	0.0679	0.877
execution phase of apoptosis (GO:0097194)	41	1	0.21	+	4.79	0.192	1
positive regulation of heart contraction (GO:0045823)	41	1	0.21	+	4.79	0.192	1
regulation of epithelial cell proliferation (GO:0050678)	371	9	1.89	+	4.76	0.000138	0.0171
regulation of protein stability (GO:0031647)	290	7	1.48	+	4.74	0.000803	0.0685
positive regulation of synaptic transmission (GO:0050806)	166	4	0.85	+	4.73	0.011	0.386
positive regulation of actin filament polymerization (GO:0030838)	83	2	0.42	+	4.73	0.0693	0.873
positive regulation of epithelial cell proliferation (GO:0050679)	208	5	1.06	+	4.72	0.00463	0.235
regulation of neuron projection development (GO:0010975)	543	13	2.77	+	4.7	4.92e-06	0.00114
regulation of heart growth (GO:0060420)	84	2	0.43	+	4.67	0.0707	0.89
regulation of systemic arterial blood pressure by hormone (GO:0001990)	42	1	0.21	+	4.67	0.196	1
membrane biogenesis (GO:0044091)	42	1	0.21	+	4.67	0.196	1
response to topologically incorrect protein (GO:0035966)	126	3	0.64	+	4.67	0.0279	0.586
CD4-positive, alpha-beta T cell differentiation (GO:0043367)	42	1	0.21	+	4.67	0.196	1
glial cell activation (GO:0061900)	42	1	0.21	+	4.67	0.196	1
response to pH (GO:0009268)	42	1	0.21	+	4.67	0.196	1
embryonic camera-type eye development (GO:0031076)	42	1	0.21	+	4.67	0.196	1
negative regulation of ossification (GO:0030279)	42	1	0.21	+	4.67	0.196	1
ovulation cycle process (GO:0022602)	42	1	0.21	+	4.67	0.196	1
cognition (GO:0050890)	337	8	1.72	+	4.66	0.000378	0.0368
calcium-mediated signaling (GO:0019722)	127	3	0.65	+	4.64	0.0285	0.597
establishment of cell polarity (GO:0030010)	127	3	0.65	+	4.64	0.0285	0.596
negative regulation of protein-containing complex disassembly (GO:0043242)	85	2	0.43	+	4.62	0.0721	0.906
pancreas development (GO:0031016)	85	2	0.43	+	4.62	0.0721	0.906
negative regulation of canonical Wnt signaling pathway (GO:0090090)	128	3	0.65	+	4.6	0.0291	0.603
sensory organ morphogenesis (GO:0090596)	299	7	1.52	+	4.6	0.000955	0.0777
positive regulation of growth (GO:0045927)	299	7	1.52	+	4.6	0.000955	0.0773
epidermis development (GO:0008544)	257	6	1.31	+	4.58	0.00224	0.139
positive regulation of peptidyl-serine phosphorylation (GO:0033138)	129	3	0.66	+	4.57	0.0296	0.614
regulation of synapse structure or activity (GO:0050803)	258	6	1.31	+	4.57	0.00229	0.141
regulation of extracellular matrix organization (GO:1903053)	43	1	0.22	+	4.57	0.201	1
epidermal growth factor receptor signaling pathway (GO:0007173)	43	1	0.22	+	4.57	0.201	1
catecholamine metabolic process (GO:0006584)	43	1	0.22	+	4.57	0.201	1
cellular response to hypoxia (GO:0071456)	86	2	0.44	+	4.57	0.0736	0.906
cellular response to retinoic acid (GO:0071300)	43	1	0.22	+	4.57	0.201	1
postsynaptic signal transduction (GO:0098926)	43	1	0.22	+	4.57	0.201	1
negative chemotaxis (GO:0050919)	43	1	0.22	+	4.57	0.201	1
detoxification (GO:0098754)	43	1	0.22	+	4.57	0.201	1
catechol-containing compound metabolic process (GO:0009712)	43	1	0.22	+	4.57	0.201	1
positive regulation of cardiac muscle tissue growth (GO:0055023)	43	1	0.22	+	4.57	0.201	1
negative regulation of anion transport (GO:1903792)	43	1	0.22	+	4.57	0.201	1
negative regulation of organ growth (GO:0046621)	43	1	0.22	+	4.57	0.201	1
behavior (GO:0007610)	688	16	3.5	+	4.57	5.26e-07	0.000218
hematopoietic progenitor cell differentiation (GO:0002244)	130	3	0.66	+	4.53	0.0302	0.584
mesenchymal cell development (GO:0014031)	87	2	0.44	+	4.51	0.075	0.921
regulation of multicellular organism growth (GO:0040014)	87	2	0.44	+	4.51	0.075	0.921
digestion (GO:0007586)	87	2	0.44	+	4.51	0.075	0.92
kidney epithelium development (GO:0072073)	131	3	0.67	+	4.5	0.0308	0.589
regulation of cell cycle G1/S phase transition (GO:1902806)	131	3	0.67	+	4.5	0.0308	0.588
generation of neurons (GO:0048699)	1359	31	6.92	+	4.48	1.19e-12	4.7e-09
plasma membrane bounded cell projection organization (GO:0120036)	1096	25	5.58	+	4.48	2.85e-10	3.21e-07
regulation of cell development (GO:0060284)	572	13	2.91	+	4.46	8.49e-06	0.00179
regulation of peptidyl-tyrosine phosphorylation (GO:0050730)	264	6	1.34	+	4.46	0.00256	0.155
cellular response to amino acid starvation (GO:0034198)	44	1	0.22	+	4.46	0.205	1
ventricular septum morphogenesis (GO:0060412)	44	1	0.22	+	4.46	0.205	1
myeloid leukocyte mediated immunity (GO:0002444)	44	1	0.22	+	4.46	0.205	1
vasculogenesis (GO:0001570)	88	2	0.45	+	4.46	0.0765	0.935
stem cell development (GO:0048864)	88	2	0.45	+	4.46	0.0765	0.934
brain morphogenesis (GO:0048854)	44	1	0.22	+	4.46	0.205	1
positive regulation of proteasomal ubiquitin-dependent protein catabolic process (GO:0032436)	88	2	0.45	+	4.46	0.0765	0.933
protein polymerization (GO:0051258)	88	2	0.45	+	4.46	0.0765	0.933
regulation of Notch signaling pathway (GO:0008593)	88	2	0.45	+	4.46	0.0765	0.932
response to organophosphorus (GO:0046683)	88	2	0.45	+	4.46	0.0765	0.931
glial cell migration (GO:0008347)	44	1	0.22	+	4.46	0.205	1
positive regulation of blood circulation (GO:1903524)	44	1	0.22	+	4.46	0.205	1
positive regulation of mitotic nuclear division (GO:0045840)	44	1	0.22	+	4.46	0.205	1
transmembrane receptor protein tyrosine kinase signaling pathway (GO:0007169)	354	8	1.8	+	4.44	0.00052	0.0466
regulation of glucose transmembrane transport (GO:0010827)	89	2	0.45	+	4.41	0.0779	0.946
negative regulation of neuron differentiation (GO:0045665)	90	2	0.46	+	4.36	0.0794	0.941
negative regulation of endothelial cell proliferation (GO:0001937)	45	1	0.23	+	4.36	0.209	1
photoreceptor cell maintenance (GO:0045494)	45	1	0.23	+	4.36	0.209	1
cell fate specification (GO:0001708)	90	2	0.46	+	4.36	0.0794	0.94
neural crest cell differentiation (GO:0014033)	90	2	0.46	+	4.36	0.0794	0.94
negative regulation of nuclear division (GO:0051784)	45	1	0.23	+	4.36	0.209	1
establishment of spindle localization (GO:0051293)	45	1	0.23	+	4.36	0.209	1
synaptic vesicle transport (GO:0048489)	45	1	0.23	+	4.36	0.209	1
stem cell division (GO:0017145)	45	1	0.23	+	4.36	0.209	1
spliceosomal complex assembly (GO:0000245)	45	1	0.23	+	4.36	0.209	1
positive regulation of glucose metabolic process (GO:0010907)	45	1	0.23	+	4.36	0.209	1
endocrine system development (GO:0035270)	135	3	0.69	+	4.36	0.0332	0.623
cellular response to glucose starvation (GO:0042149)	45	1	0.23	+	4.36	0.209	1
regulation of mesenchymal cell proliferation (GO:0010464)	45	1	0.23	+	4.36	0.209	1
positive regulation of fatty acid metabolic process (GO:0045923)	45	1	0.23	+	4.36	0.209	1
adherens junction organization (GO:0034332)	45	1	0.23	+	4.36	0.209	1
response to metal ion (GO:0010038)	271	6	1.38	+	4.35	0.0029	0.173
regulation of synaptic plasticity (GO:0048167)	226	5	1.15	+	4.34	0.00649	0.299
regulation of osteoblast differentiation (GO:0045667)	136	3	0.69	+	4.33	0.0338	0.634
regulation of nuclear division (GO:0051783)	136	3	0.69	+	4.33	0.0338	0.633
positive regulation of Wnt signaling pathway (GO:0030177)	136	3	0.69	+	4.33	0.0338	0.632
circadian rhythm (GO:0007623)	136	3	0.69	+	4.33	0.0338	0.632
cell cycle arrest (GO:0007050)	91	2	0.46	+	4.31	0.0809	0.956
cellular response to decreased oxygen levels (GO:0036294)	91	2	0.46	+	4.31	0.0809	0.956
regulation of microtubule polymerization or depolymerization (GO:0031110)	91	2	0.46	+	4.31	0.0809	0.955
regulation of protein polymerization (GO:0032271)	228	5	1.16	+	4.31	0.00672	0.307
central nervous system development (GO:0007417)	868	19	4.42	+	4.3	1e-07	5.27e-05
positive regulation of heart growth (GO:0060421)	46	1	0.23	+	4.27	0.213	1
regulation of polysaccharide metabolic process (GO:0032881)	46	1	0.23	+	4.27	0.213	1
membrane depolarization (GO:0051899)	46	1	0.23	+	4.27	0.213	1
action potential (GO:0001508)	92	2	0.47	+	4.27	0.0824	0.972
regulation of protein autophosphorylation (GO:0031952)	46	1	0.23	+	4.27	0.213	1
neuromuscular process (GO:0050905)	138	3	0.7	+	4.27	0.035	0.622
pigmentation (GO:0043473)	92	2	0.47	+	4.27	0.0824	0.971
neuroinflammatory response (GO:0150076)	46	1	0.23	+	4.27	0.213	1
positive regulation of phospholipase activity (GO:0010518)	46	1	0.23	+	4.27	0.213	1
establishment of protein localization to vacuole (GO:0072666)	46	1	0.23	+	4.27	0.213	1
cell projection organization (GO:0030030)	1152	25	5.87	+	4.26	7.83e-10	7.72e-07
regulation of neuron differentiation (GO:0045664)	231	5	1.18	+	4.25	0.00708	0.315
potassium ion transmembrane transport (GO:0071805)	139	3	0.71	+	4.24	0.0356	0.632
negative regulation of cell migration (GO:0030336)	278	6	1.42	+	4.24	0.00328	0.187
regulation of supramolecular fiber organization (GO:1902903)	372	8	1.89	+	4.22	0.000713	0.0619
neurogenesis (GO:0022008)	1491	32	7.59	+	4.21	2.3e-12	7.27e-09
response to inorganic substance (GO:0010035)	422	9	2.15	+	4.19	0.000351	0.0355
positive regulation of nitric oxide biosynthetic process (GO:0045429)	47	1	0.24	+	4.18	0.217	1
lysosome localization (GO:0032418)	47	1	0.24	+	4.18	0.217	1
peptidyl-tyrosine phosphorylation (GO:0018108)	94	2	0.48	+	4.18	0.0854	0.985
regulation of stress fiber assembly (GO:0051492)	94	2	0.48	+	4.18	0.0854	0.985
detection of mechanical stimulus involved in sensory perception (GO:0050974)	47	1	0.24	+	4.18	0.217	1
midbrain development (GO:0030901)	47	1	0.24	+	4.18	0.217	1
response to hydrogen peroxide (GO:0042542)	94	2	0.48	+	4.18	0.0854	0.984
positive regulation of epithelial to mesenchymal transition (GO:0010718)	47	1	0.24	+	4.18	0.217	1
bone mineralization (GO:0030282)	47	1	0.24	+	4.18	0.217	1
phosphatidylcholine metabolic process (GO:0046470)	47	1	0.24	+	4.18	0.217	1
heart valve morphogenesis (GO:0003179)	47	1	0.24	+	4.18	0.217	1
muscle contraction (GO:0006936)	189	4	0.96	+	4.15	0.0169	0.46
energy derivation by oxidation of organic compounds (GO:0015980)	189	4	0.96	+	4.15	0.0169	0.46
regulation of protein depolymerization (GO:1901879)	95	2	0.48	+	4.13	0.0869	0.999
regulation of canonical Wnt signaling pathway (GO:0060828)	239	5	1.22	+	4.11	0.00812	0.344
regulation of neutrophil migration (GO:1902622)	48	1	0.24	+	4.09	0.221	1
regulation of collagen biosynthetic process (GO:0032965)	48	1	0.24	+	4.09	0.221	1
response to amino acid starvation (GO:1990928)	48	1	0.24	+	4.09	0.221	1
phospholipid translocation (GO:0045332)	48	1	0.24	+	4.09	0.221	1
ERBB signaling pathway (GO:0038127)	48	1	0.24	+	4.09	0.221	1
cochlea development (GO:0090102)	48	1	0.24	+	4.09	0.221	1
regulation of protein localization to membrane (GO:1905475)	192	4	0.98	+	4.09	0.0177	0.476
histone deacetylation (GO:0016575)	48	1	0.24	+	4.09	0.221	1
phospholipid catabolic process (GO:0009395)	48	1	0.24	+	4.09	0.221	1
negative regulation of microtubule polymerization or depolymerization (GO:0031111)	48	1	0.24	+	4.09	0.221	1
positive regulation of nitric oxide metabolic process (GO:1904407)	48	1	0.24	+	4.09	0.221	1
somatic stem cell population maintenance (GO:0035019)	48	1	0.24	+	4.09	0.221	1
regulation of viral entry into host cell (GO:0046596)	48	1	0.24	+	4.09	0.221	1
positive regulation of leukocyte chemotaxis (GO:0002690)	96	2	0.49	+	4.09	0.0885	0.999
regulation of plasma membrane bounded cell projection organization (GO:0120035)	724	15	3.69	+	4.07	4.91e-06	0.00116
peptidyl-tyrosine modification (GO:0018212)	97	2	0.49	+	4.05	0.09	1
negative regulation of cell motility (GO:2000146)	291	6	1.48	+	4.05	0.00408	0.217
positive regulation of cold-induced thermogenesis (GO:0120162)	97	2	0.49	+	4.05	0.09	1
muscle system process (GO:0003012)	243	5	1.24	+	4.04	0.00867	0.359
chemotaxis (GO:0006935)	486	10	2.48	+	4.04	0.000217	0.0243
camera-type eye morphogenesis (GO:0048593)	146	3	0.74	+	4.03	0.0402	0.675
regulation of protein-containing complex assembly (GO:0043254)	439	9	2.24	+	4.02	0.000464	0.0426
regulation of cardiac muscle cell proliferation (GO:0060043)	49	1	0.25	+	4.01	0.225	1
regulation of triglyceride metabolic process (GO:0090207)	49	1	0.25	+	4.01	0.225	1
maturation of SSU-rRNA (GO:0030490)	49	1	0.25	+	4.01	0.225	1
positive regulation of muscle contraction (GO:0045933)	49	1	0.25	+	4.01	0.225	1
positive regulation of protein tyrosine kinase activity (GO:0061098)	49	1	0.25	+	4.01	0.225	1
negative regulation of epithelial cell proliferation (GO:0050680)	147	3	0.75	+	4.01	0.0409	0.682
positive regulation of transferase activity (GO:0051347)	589	12	3	+	4	5.45e-05	0.00775
taxis (GO:0042330)	491	10	2.5	+	4	0.000235	0.0261
regulation of developmental growth (GO:0048638)	393	8	2	+	4	0.00101	0.0809
brain development (GO:0007420)	641	13	3.27	+	3.98	2.74e-05	0.00451
epidermal cell differentiation (GO:0009913)	148	3	0.75	+	3.98	0.0416	0.69
response to mechanical stimulus (GO:0009612)	148	3	0.75	+	3.98	0.0416	0.69
regulation of cell projection organization (GO:0031344)	740	15	3.77	+	3.98	6.35e-06	0.00135
regulation of phosphatidylinositol 3-kinase signaling (GO:0014066)	99	2	0.5	+	3.97	0.0931	1
cellular carbohydrate metabolic process (GO:0044262)	149	3	0.76	+	3.95	0.0422	0.697
head development (GO:0060322)	696	14	3.55	+	3.95	1.44e-05	0.00271
cell junction assembly (GO:0034329)	249	5	1.27	+	3.94	0.00956	0.389
negative regulation of cellular component movement (GO:0051271)	300	6	1.53	+	3.93	0.00471	0.238
mammary gland development (GO:0030879)	150	3	0.76	+	3.93	0.0429	0.708
lipid translocation (GO:0034204)	50	1	0.25	+	3.93	0.228	1
intermediate filament cytoskeleton organization (GO:0045104)	50	1	0.25	+	3.93	0.228	1
spindle localization (GO:0051653)	50	1	0.25	+	3.93	0.228	1
regulation of behavior (GO:0050795)	100	2	0.51	+	3.93	0.0946	1
positive regulation of biomineral tissue development (GO:0070169)	50	1	0.25	+	3.93	0.228	1
negative regulation of epithelial cell differentiation (GO:0030857)	50	1	0.25	+	3.93	0.228	1
negative regulation of blood vessel diameter (GO:0097756)	50	1	0.25	+	3.93	0.228	1
regulation of BMP signaling pathway (GO:0030510)	100	2	0.51	+	3.93	0.0946	1
cellular response to heat (GO:0034605)	50	1	0.25	+	3.93	0.228	1
glycerolipid catabolic process (GO:0046503)	50	1	0.25	+	3.93	0.228	1
regulation of plasma lipoprotein particle levels (GO:0097006)	50	1	0.25	+	3.93	0.228	1
blastocyst development (GO:0001824)	151	3	0.77	+	3.9	0.0436	0.717
regulation of epithelial cell differentiation (GO:0030856)	151	3	0.77	+	3.9	0.0436	0.716
modulation of chemical synaptic transmission (GO:0050804)	504	10	2.57	+	3.9	0.000288	0.0303
positive regulation of cell cycle (GO:0045787)	353	7	1.8	+	3.89	0.00241	0.147
positive regulation of ubiquitin-dependent protein catabolic process (GO:2000060)	101	2	0.51	+	3.89	0.0962	1
response to acid chemical (GO:0001101)	101	2	0.51	+	3.89	0.0962	1
regulation of trans-synaptic signaling (GO:0099177)	505	10	2.57	+	3.89	0.000293	0.0306
negative regulation of cell projection organization (GO:0031345)	202	4	1.03	+	3.89	0.0209	0.495
positive regulation of kinase activity (GO:0033674)	508	10	2.59	+	3.86	0.000307	0.0316
intrinsic apoptotic signaling pathway by p53 class mediator (GO:0072332)	51	1	0.26	+	3.85	0.232	1
Golgi to plasma membrane transport (GO:0006893)	51	1	0.26	+	3.85	0.232	1
positive regulation of biomineralization (GO:0110151)	51	1	0.26	+	3.85	0.232	1
myeloid cell activation involved in immune response (GO:0002275)	51	1	0.26	+	3.85	0.232	1
negative regulation of gliogenesis (GO:0014014)	51	1	0.26	+	3.85	0.232	1
intermediate filament-based process (GO:0045103)	51	1	0.26	+	3.85	0.232	1
T cell selection (GO:0045058)	51	1	0.26	+	3.85	0.232	1
regulation of protein deacetylation (GO:0090311)	51	1	0.26	+	3.85	0.232	1
embryonic cranial skeleton morphogenesis (GO:0048701)	51	1	0.26	+	3.85	0.232	1
regulation of ubiquitin-protein transferase activity (GO:0051438)	51	1	0.26	+	3.85	0.232	1
protein destabilization (GO:0031648)	51	1	0.26	+	3.85	0.232	1
regulation of postsynapse organization (GO:0099175)	102	2	0.52	+	3.85	0.0978	1
smooth muscle cell differentiation (GO:0051145)	51	1	0.26	+	3.85	0.232	1
cellular response to drug (GO:0035690)	51	1	0.26	+	3.85	0.232	1
microtubule polymerization or depolymerization (GO:0031109)	51	1	0.26	+	3.85	0.232	1
regulation of striated muscle tissue development (GO:0016202)	51	1	0.26	+	3.85	0.232	1
odontogenesis (GO:0042476)	102	2	0.52	+	3.85	0.0978	1
female gonad development (GO:0008585)	102	2	0.52	+	3.85	0.0978	1
negative regulation of mitochondrion organization (GO:0010823)	51	1	0.26	+	3.85	0.232	1
synaptic vesicle localization (GO:0097479)	51	1	0.26	+	3.85	0.232	1
trabecula morphogenesis (GO:0061383)	51	1	0.26	+	3.85	0.232	1
cellular response to metal ion (GO:0071248)	154	3	0.78	+	3.82	0.0457	0.727
response to unfolded protein (GO:0006986)	103	2	0.52	+	3.81	0.0994	1
response to purine-containing compound (GO:0014074)	103	2	0.52	+	3.81	0.0994	1
regulation of viral life cycle (GO:1903900)	155	3	0.79	+	3.8	0.0465	0.736
mesenchymal cell differentiation (GO:0048762)	156	3	0.79	+	3.78	0.0472	0.746
rhythmic process (GO:0048511)	260	5	1.32	+	3.78	0.0113	0.394
regulation of systemic arterial blood pressure mediated by a chemical signal (GO:0003044)	52	1	0.26	+	3.78	0.236	1
protein deacetylation (GO:0006476)	52	1	0.26	+	3.78	0.236	1
regulation of multi-organism process (GO:0043900)	52	1	0.26	+	3.78	0.236	1
positive regulation of nervous system process (GO:0031646)	52	1	0.26	+	3.78	0.236	1
lung development (GO:0030324)	208	4	1.06	+	3.78	0.0229	0.526
cardiac conduction (GO:0061337)	52	1	0.26	+	3.78	0.236	1
ceramide biosynthetic process (GO:0046513)	52	1	0.26	+	3.78	0.236	1
negative regulation of epithelial cell apoptotic process (GO:1904036)	52	1	0.26	+	3.78	0.236	1
chaperone-mediated protein folding (GO:0061077)	52	1	0.26	+	3.78	0.236	1
retina development in camera-type eye (GO:0060041)	157	3	0.8	+	3.75	0.0479	0.756
positive regulation of cellular component biogenesis (GO:0044089)	524	10	2.67	+	3.75	0.00039	0.0373
protein localization to cell junction (GO:1902414)	105	2	0.53	+	3.74	0.103	1
negative regulation of viral process (GO:0048525)	105	2	0.53	+	3.74	0.103	1
development of primary female sexual characteristics (GO:0046545)	105	2	0.53	+	3.74	0.103	1
positive regulation of cellular amide metabolic process (GO:0034250)	158	3	0.8	+	3.73	0.0487	0.764
respiratory tube development (GO:0030323)	211	4	1.07	+	3.72	0.024	0.545
cerebral cortex cell migration (GO:0021795)	53	1	0.27	+	3.7	0.24	1
negative regulation of oxidative stress-induced cell death (GO:1903202)	53	1	0.27	+	3.7	0.24	1
regulation of proteolysis involved in cellular protein catabolic process (GO:1903050)	212	4	1.08	+	3.7	0.0243	0.552
ventral spinal cord development (GO:0021517)	53	1	0.27	+	3.7	0.24	1
regulation of actomyosin structure organization (GO:0110020)	106	2	0.54	+	3.7	0.104	1
regulation of transcription regulatory region DNA binding (GO:2000677)	53	1	0.27	+	3.7	0.24	1
modulation by symbiont of entry into host (GO:0052372)	53	1	0.27	+	3.7	0.24	1
cellular response to oxygen levels (GO:0071453)	106	2	0.54	+	3.7	0.104	1
positive regulation of canonical Wnt signaling pathway (GO:0090263)	106	2	0.54	+	3.7	0.104	1
negative regulation of smooth muscle cell proliferation (GO:0048662)	53	1	0.27	+	3.7	0.24	1
regulation of phosphoprotein phosphatase activity (GO:0043666)	53	1	0.27	+	3.7	0.24	1
endoplasmic reticulum unfolded protein response (GO:0030968)	53	1	0.27	+	3.7	0.24	1
regulation of fibroblast proliferation (GO:0048145)	106	2	0.54	+	3.7	0.104	1
ventricular cardiac muscle tissue morphogenesis (GO:0055010)	53	1	0.27	+	3.7	0.24	1
actin polymerization or depolymerization (GO:0008154)	53	1	0.27	+	3.7	0.24	1
negative regulation of supramolecular fiber organization (GO:1902904)	159	3	0.81	+	3.7	0.0494	0.771
cellular component disassembly (GO:0022411)	213	4	1.08	+	3.69	0.0247	0.557
regulation of cell division (GO:0051302)	160	3	0.81	+	3.68	0.0501	0.75
visual perception (GO:0007601)	160	3	0.81	+	3.68	0.0501	0.749
positive regulation of cellular protein localization (GO:1903829)	267	5	1.36	+	3.68	0.0126	0.412
positive regulation of proteasomal protein catabolic process (GO:1901800)	107	2	0.55	+	3.67	0.106	1
positive regulation of protein kinase B signaling (GO:0051897)	107	2	0.55	+	3.67	0.106	1
response to endoplasmic reticulum stress (GO:0034976)	214	4	1.09	+	3.67	0.025	0.563
negative regulation of Wnt signaling pathway (GO:0030178)	161	3	0.82	+	3.66	0.0509	0.756
regulation of acute inflammatory response (GO:0002673)	54	1	0.28	+	3.64	0.244	1
potassium ion transport (GO:0006813)	162	3	0.83	+	3.64	0.0517	0.766
positive regulation of stem cell proliferation (GO:2000648)	54	1	0.28	+	3.64	0.244	1
regulation of amino acid transport (GO:0051955)	54	1	0.28	+	3.64	0.244	1
digestive tract morphogenesis (GO:0048546)	54	1	0.28	+	3.64	0.244	1
response to toxic substance (GO:0009636)	108	2	0.55	+	3.64	0.107	1
regulation of substrate adhesion-dependent cell spreading (GO:1900024)	54	1	0.28	+	3.64	0.244	1
signal transduction by protein phosphorylation (GO:0023014)	162	3	0.83	+	3.64	0.0517	0.765
positive regulation of cell differentiation (GO:0045597)	921	17	4.69	+	3.62	4.93e-06	0.00113
regulation of protein kinase B signaling (GO:0051896)	163	3	0.83	+	3.61	0.0524	0.773
negative regulation of locomotion (GO:0040013)	326	6	1.66	+	3.61	0.00695	0.315
positive regulation of protein localization to membrane (GO:1905477)	109	2	0.56	+	3.6	0.109	1
regulation of receptor-mediated endocytosis (GO:0048259)	109	2	0.56	+	3.6	0.109	1
regulation of peptidyl-serine phosphorylation (GO:0033135)	164	3	0.84	+	3.59	0.0532	0.781
sensory perception of light stimulus (GO:0050953)	164	3	0.84	+	3.59	0.0532	0.78
apoptotic signaling pathway (GO:0097190)	274	5	1.4	+	3.58	0.0139	0.447
cellular response to organonitrogen compound (GO:0071417)	439	8	2.24	+	3.58	0.002	0.128
negative regulation of G protein-coupled receptor signaling pathway (GO:0045744)	55	1	0.28	+	3.57	0.248	1
mesoderm development (GO:0007498)	110	2	0.56	+	3.57	0.111	1
smooth muscle contraction (GO:0006939)	55	1	0.28	+	3.57	0.248	1
regulation of epidermal cell differentiation (GO:0045604)	55	1	0.28	+	3.57	0.248	1
regulation of actin filament organization (GO:0110053)	275	5	1.4	+	3.57	0.0141	0.45
positive regulation of reactive oxygen species metabolic process (GO:2000379)	110	2	0.56	+	3.57	0.111	1
regulation of muscle organ development (GO:0048634)	55	1	0.28	+	3.57	0.248	1
regulation of actin filament bundle assembly (GO:0032231)	110	2	0.56	+	3.57	0.111	1
endocrine process (GO:0050886)	55	1	0.28	+	3.57	0.248	1
non-motile cilium assembly (GO:1905515)	55	1	0.28	+	3.57	0.248	1
regulation of transforming growth factor beta receptor signaling pathway (GO:0017015)	110	2	0.56	+	3.57	0.111	1
positive regulation of epithelial cell differentiation (GO:0030858)	55	1	0.28	+	3.57	0.248	1
regulation of long-term synaptic potentiation (GO:1900271)	55	1	0.28	+	3.57	0.248	1
ovulation cycle (GO:0042698)	55	1	0.28	+	3.57	0.248	1
positive regulation of tyrosine phosphorylation of STAT protein (GO:0042531)	55	1	0.28	+	3.57	0.248	1
negative regulation of BMP signaling pathway (GO:0030514)	55	1	0.28	+	3.57	0.248	1
regulation of collagen metabolic process (GO:0010712)	55	1	0.28	+	3.57	0.248	1
macrophage activation (GO:0042116)	55	1	0.28	+	3.57	0.248	1
regulation of microtubule-based movement (GO:0060632)	55	1	0.28	+	3.57	0.248	1
positive regulation of cytokine production involved in immune response (GO:0002720)	55	1	0.28	+	3.57	0.248	1
positive regulation of cell death (GO:0010942)	661	12	3.37	+	3.56	0.000158	0.0189
positive regulation of cell population proliferation (GO:0008284)	992	18	5.05	+	3.56	3.17e-06	0.00082
embryonic placenta development (GO:0001892)	111	2	0.57	+	3.54	0.112	1
retina homeostasis (GO:0001895)	56	1	0.29	+	3.51	0.252	1
regulation of mononuclear cell migration (GO:0071675)	56	1	0.29	+	3.51	0.252	1
regulation of sensory perception of pain (GO:0051930)	56	1	0.29	+	3.51	0.252	1
intraspecies interaction between organisms (GO:0051703)	56	1	0.29	+	3.51	0.252	1
cellular component maintenance (GO:0043954)	56	1	0.29	+	3.51	0.252	1
tissue remodeling (GO:0048771)	112	2	0.57	+	3.51	0.114	1
thymus development (GO:0048538)	56	1	0.29	+	3.51	0.252	1
regulation of actin filament depolymerization (GO:0030834)	56	1	0.29	+	3.51	0.252	1
positive regulation of dephosphorylation (GO:0035306)	56	1	0.29	+	3.51	0.252	1
social behavior (GO:0035176)	56	1	0.29	+	3.51	0.252	1
positive regulation of receptor signaling pathway via JAK-STAT (GO:0046427)	56	1	0.29	+	3.51	0.252	1
regulation of cellular amide metabolic process (GO:0034248)	393	7	2	+	3.5	0.0043	0.226
nervous system development (GO:0007399)	2088	37	10.64	+	3.48	7.31e-12	1.92e-08
response to peptide (GO:1901652)	339	6	1.73	+	3.47	0.00831	0.346
multicellular organismal signaling (GO:0035637)	113	2	0.58	+	3.47	0.116	1
regulation of axon extension (GO:0030516)	113	2	0.58	+	3.47	0.116	1
regulation of cellular response to transforming growth factor beta stimulus (GO:1903844)	113	2	0.58	+	3.47	0.116	1
epithelial cell development (GO:0002064)	227	4	1.16	+	3.46	0.0301	0.583
cellular response to catecholamine stimulus (GO:0071870)	57	1	0.29	+	3.44	0.256	1
cellular response to monoamine stimulus (GO:0071868)	57	1	0.29	+	3.44	0.256	1
regulation of granulocyte chemotaxis (GO:0071622)	57	1	0.29	+	3.44	0.256	1
regulation of sensory perception (GO:0051931)	57	1	0.29	+	3.44	0.256	1
receptor clustering (GO:0043113)	57	1	0.29	+	3.44	0.256	1
regulation of membrane lipid distribution (GO:0097035)	57	1	0.29	+	3.44	0.256	1
heart valve development (GO:0003170)	57	1	0.29	+	3.44	0.256	1
cellular response to peptide (GO:1901653)	229	4	1.17	+	3.43	0.0309	0.59
placenta development (GO:0001890)	172	3	0.88	+	3.42	0.0595	0.81
eye morphogenesis (GO:0048592)	172	3	0.88	+	3.42	0.0595	0.809
regulation of actin filament polymerization (GO:0030833)	172	3	0.88	+	3.42	0.0595	0.809
regulation of synapse assembly (GO:0051963)	115	2	0.59	+	3.41	0.119	1
cell maturation (GO:0048469)	173	3	0.88	+	3.4	0.0604	0.818
response to catecholamine (GO:0071869)	58	1	0.3	+	3.38	0.259	1
response to monoamine (GO:0071867)	58	1	0.3	+	3.38	0.259	1
regulation of stem cell differentiation (GO:2000736)	58	1	0.3	+	3.38	0.259	1
regulation of interleukin-2 production (GO:0032663)	58	1	0.3	+	3.38	0.259	1
negative regulation of viral genome replication (GO:0045071)	58	1	0.3	+	3.38	0.259	1
regulation of action potential (GO:0098900)	58	1	0.3	+	3.38	0.259	1
carbohydrate derivative transport (GO:1901264)	58	1	0.3	+	3.38	0.259	1
aorta development (GO:0035904)	58	1	0.3	+	3.38	0.259	1
response to interferon-beta (GO:0035456)	58	1	0.3	+	3.38	0.259	1
protein localization to vacuole (GO:0072665)	58	1	0.3	+	3.38	0.259	1
negative regulation of cell adhesion (GO:0007162)	291	5	1.48	+	3.37	0.0175	0.475
regulation of cell migration (GO:0030334)	933	16	4.75	+	3.37	2.34e-05	0.00394
urogenital system development (GO:0001655)	350	6	1.78	+	3.37	0.00961	0.39
stem cell differentiation (GO:0048863)	175	3	0.89	+	3.37	0.062	0.836
positive regulation of cell junction assembly (GO:1901890)	117	2	0.6	+	3.36	0.122	1
regulation of neural precursor cell proliferation (GO:2000177)	117	2	0.6	+	3.36	0.122	1
regulation of transferase activity (GO:0051338)	878	15	4.47	+	3.35	4.51e-05	0.00665
positive regulation of developmental process (GO:0051094)	1410	24	7.18	+	3.34	1.73e-07	8.8e-05
regulation of cellular component size (GO:0032535)	412	7	2.1	+	3.34	0.00552	0.266
positive regulation of protein phosphorylation (GO:0001934)	1001	17	5.1	+	3.33	1.43e-05	0.00273
hindbrain morphogenesis (GO:0021575)	59	1	0.3	+	3.33	0.263	1
positive regulation of lipase activity (GO:0060193)	59	1	0.3	+	3.33	0.263	1
blastocyst formation (GO:0001825)	59	1	0.3	+	3.33	0.263	1
stem cell proliferation (GO:0072089)	59	1	0.3	+	3.33	0.263	1
cell-cell junction organization (GO:0045216)	177	3	0.9	+	3.33	0.0637	0.857
protein N-linked glycosylation (GO:0006487)	59	1	0.3	+	3.33	0.263	1
regulation of neurotransmitter levels (GO:0001505)	236	4	1.2	+	3.33	0.0339	0.628
positive regulation of nuclear division (GO:0051785)	59	1	0.3	+	3.33	0.263	1
regulation of cell cycle arrest (GO:0071156)	59	1	0.3	+	3.33	0.263	1
regulation of kinase activity (GO:0043549)	767	13	3.91	+	3.33	0.000162	0.0193
negative regulation of muscle cell differentiation (GO:0051148)	59	1	0.3	+	3.33	0.263	1
regulation of ATPase activity (GO:0043462)	59	1	0.3	+	3.33	0.263	1
learning (GO:0007612)	177	3	0.9	+	3.33	0.0637	0.856
kidney development (GO:0001822)	296	5	1.51	+	3.32	0.0187	0.495
skin development (GO:0043588)	237	4	1.21	+	3.31	0.0344	0.635
regionalization (GO:0003002)	357	6	1.82	+	3.3	0.0105	0.374
female sex differentiation (GO:0046660)	119	2	0.61	+	3.3	0.126	1
cellular response to inorganic substance (GO:0071241)	179	3	0.91	+	3.29	0.0654	0.851
regulation of nervous system process (GO:0031644)	179	3	0.91	+	3.29	0.0654	0.851
positive regulation of phosphorylation (GO:0042327)	1075	18	5.48	+	3.29	9.41e-06	0.00193
respiratory system development (GO:0060541)	239	4	1.22	+	3.29	0.0353	0.626
positive regulation of cellular component organization (GO:0051130)	1196	20	6.09	+	3.28	2.85e-06	0.000749
face development (GO:0060324)	60	1	0.31	+	3.27	0.267	1
amino acid transport (GO:0006865)	120	2	0.61	+	3.27	0.127	1
organic hydroxy compound catabolic process (GO:1901616)	60	1	0.31	+	3.27	0.267	1
digestive tract development (GO:0048565)	120	2	0.61	+	3.27	0.127	1
cellular response to hydrogen peroxide (GO:0070301)	60	1	0.31	+	3.27	0.267	1
skeletal muscle cell differentiation (GO:0035914)	60	1	0.31	+	3.27	0.267	1
negative regulation of actin filament polymerization (GO:0030837)	60	1	0.31	+	3.27	0.267	1
positive regulation of cellular carbohydrate metabolic process (GO:0010676)	60	1	0.31	+	3.27	0.267	1
labyrinthine layer development (GO:0060711)	60	1	0.31	+	3.27	0.267	1
regulation of proteasomal protein catabolic process (GO:0061136)	180	3	0.92	+	3.27	0.0662	0.86
regulation of system process (GO:0044057)	601	10	3.06	+	3.27	0.0011	0.0856
regulation of heart contraction (GO:0008016)	181	3	0.92	+	3.25	0.0671	0.87
animal organ morphogenesis (GO:0009887)	1026	17	5.23	+	3.25	1.96e-05	0.00347
regulation of actin cytoskeleton organization (GO:0032956)	363	6	1.85	+	3.24	0.0113	0.393
regulation of leukocyte chemotaxis (GO:0002688)	121	2	0.62	+	3.24	0.129	1
second-messenger-mediated signaling (GO:0019932)	303	5	1.54	+	3.24	0.0204	0.485
positive regulation of proteolysis involved in cellular protein catabolic process (GO:1903052)	122	2	0.62	+	3.22	0.131	1
negative regulation of intracellular transport (GO:0032387)	61	1	0.31	+	3.22	0.271	1
negative regulation of transmembrane receptor protein serine/threonine kinase signaling pathway (GO:0090101)	122	2	0.62	+	3.22	0.131	1
regulation of cytokine secretion (GO:0050707)	61	1	0.31	+	3.22	0.271	1
positive regulation of receptor signaling pathway via STAT (GO:1904894)	61	1	0.31	+	3.22	0.271	1
positive regulation of DNA binding (GO:0043388)	61	1	0.31	+	3.22	0.271	1
negative regulation of cell-substrate adhesion (GO:0010812)	61	1	0.31	+	3.22	0.271	1
regulation of Wnt signaling pathway (GO:0030111)	306	5	1.56	+	3.21	0.0212	0.496
positive regulation of catalytic activity (GO:0043085)	1105	18	5.63	+	3.2	1.36e-05	0.00261
regulation of cell motility (GO:2000145)	983	16	5.01	+	3.2	4.35e-05	0.00654
regulation of cellular protein catabolic process (GO:1903362)	246	4	1.25	+	3.19	0.0385	0.674
positive regulation of endocytosis (GO:0045807)	123	2	0.63	+	3.19	0.132	1
response to extracellular stimulus (GO:0009991)	369	6	1.88	+	3.19	0.0122	0.407
regulation of GTPase activity (GO:0043087)	309	5	1.57	+	3.18	0.0219	0.511
regulation of epidermis development (GO:0045682)	62	1	0.32	+	3.17	0.274	1
regulation of pathway-restricted SMAD protein phosphorylation (GO:0060393)	62	1	0.32	+	3.17	0.274	1
positive regulation of protein localization to plasma membrane (GO:1903078)	62	1	0.32	+	3.17	0.274	1
detection of mechanical stimulus (GO:0050982)	62	1	0.32	+	3.17	0.274	1
post-embryonic development (GO:0009791)	124	2	0.63	+	3.17	0.134	1
cortical cytoskeleton organization (GO:0030865)	62	1	0.32	+	3.17	0.274	1
autophagosome assembly (GO:0000045)	62	1	0.32	+	3.17	0.274	1
negative regulation of protein catabolic process (GO:0042177)	124	2	0.63	+	3.17	0.134	1
positive regulation of reactive oxygen species biosynthetic process (GO:1903428)	62	1	0.32	+	3.17	0.274	1
renal system development (GO:0072001)	311	5	1.58	+	3.16	0.0225	0.521
apoptotic process (GO:0006915)	809	13	4.12	+	3.15	0.00027	0.0288
positive regulation of protein kinase activity (GO:0045860)	437	7	2.23	+	3.14	0.0075	0.328
regulation of protein phosphorylation (GO:0001932)	1439	23	7.33	+	3.14	9.66e-07	0.000363
anatomical structure morphogenesis (GO:0009653)	2254	36	11.48	+	3.14	2.81e-10	3.41e-07
regulation of cellular component movement (GO:0051270)	1069	17	5.45	+	3.12	3.27e-05	0.00516
sphingolipid metabolic process (GO:0006665)	126	2	0.64	+	3.12	0.138	1
mesoderm formation (GO:0001707)	63	1	0.32	+	3.12	0.278	1
positive regulation of cell cycle process (GO:0090068)	252	4	1.28	+	3.12	0.0414	0.689
macromolecule deacylation (GO:0098732)	63	1	0.32	+	3.12	0.278	1
protein deacylation (GO:0035601)	63	1	0.32	+	3.12	0.278	1
regulation of phosphorylation (GO:0042325)	1578	25	8.04	+	3.11	3.45e-07	0.000151
negative regulation of developmental process (GO:0051093)	947	15	4.82	+	3.11	0.000104	0.0134
developmental growth (GO:0048589)	442	7	2.25	+	3.11	0.00795	0.342
actin filament organization (GO:0007015)	253	4	1.29	+	3.1	0.0419	0.693
regulation of cell death (GO:0010941)	1646	26	8.38	+	3.1	2.01e-07	9.93e-05
cardiac muscle tissue development (GO:0048738)	190	3	0.97	+	3.1	0.075	0.92
regulation of actin polymerization or depolymerization (GO:0008064)	190	3	0.97	+	3.1	0.075	0.919
response to calcium ion (GO:0051592)	127	2	0.65	+	3.09	0.139	1
transition metal ion homeostasis (GO:0055076)	127	2	0.65	+	3.09	0.139	1
positive regulation of phosphorus metabolic process (GO:0010562)	1145	18	5.83	+	3.09	2.17e-05	0.00376
positive regulation of phosphate metabolic process (GO:0045937)	1145	18	5.83	+	3.09	2.17e-05	0.00372
cellular response to nitrogen compound (GO:1901699)	510	8	2.6	+	3.08	0.00489	0.243
cellular respiration (GO:0045333)	128	2	0.65	+	3.07	0.141	1
cellular response to ionizing radiation (GO:0071479)	64	1	0.33	+	3.07	0.282	1
ovarian follicle development (GO:0001541)	64	1	0.33	+	3.07	0.282	1
bicellular tight junction assembly (GO:0070830)	64	1	0.33	+	3.07	0.282	1
regulation of neurotransmitter receptor activity (GO:0099601)	64	1	0.33	+	3.07	0.282	1
regulation of chromosome separation (GO:1905818)	64	1	0.33	+	3.07	0.282	1
regulation of extent of cell growth (GO:0061387)	128	2	0.65	+	3.07	0.141	1
cell development (GO:0048468)	1795	28	9.14	+	3.06	7.82e-08	4.41e-05
regulation of actin filament length (GO:0030832)	193	3	0.98	+	3.05	0.0778	0.946
neural tube development (GO:0021915)	193	3	0.98	+	3.05	0.0778	0.945
regulation of locomotion (GO:0040012)	1030	16	5.25	+	3.05	7.49e-05	0.0102
negative regulation of translation (GO:0017148)	129	2	0.66	+	3.04	0.143	1
regulation of protein-containing complex disassembly (GO:0043244)	129	2	0.66	+	3.04	0.143	1
response to hypoxia (GO:0001666)	194	3	0.99	+	3.04	0.0787	0.933
regulation of anatomical structure size (GO:0090066)	582	9	2.96	+	3.04	0.00315	0.182
regulation of protein catabolic process (GO:0042176)	388	6	1.98	+	3.04	0.0152	0.429
embryonic organ morphogenesis (GO:0048562)	324	5	1.65	+	3.03	0.0262	0.555
epithelial to mesenchymal transition (GO:0001837)	65	1	0.33	+	3.02	0.285	1
negative regulation of calcium ion transport (GO:0051926)	65	1	0.33	+	3.02	0.285	1
protein localization to endoplasmic reticulum (GO:0070972)	65	1	0.33	+	3.02	0.285	1
regulation of circadian rhythm (GO:0042752)	130	2	0.66	+	3.02	0.144	1
positive regulation of apoptotic process (GO:0043065)	586	9	2.98	+	3.02	0.0033	0.186
programmed cell death (GO:0012501)	847	13	4.31	+	3.01	0.000416	0.0389
positive regulation of DNA-binding transcription factor activity (GO:0051091)	261	4	1.33	+	3.01	0.046	0.73
regulation of cell differentiation (GO:0045595)	1570	24	8	+	3	1.17e-06	0.00041
growth (GO:0040007)	458	7	2.33	+	3	0.00953	0.389
positive regulation of programmed cell death (GO:0043068)	591	9	3.01	+	2.99	0.00348	0.194
negative regulation of proteolysis involved in cellular protein catabolic process (GO:1903051)	66	1	0.34	+	2.97	0.289	1
transmission of nerve impulse (GO:0019226)	66	1	0.34	+	2.97	0.289	1
myeloid leukocyte activation (GO:0002274)	132	2	0.67	+	2.97	0.148	1
regulation of proteasomal ubiquitin-dependent protein catabolic process (GO:0032434)	132	2	0.67	+	2.97	0.148	1
regulation of cytoskeleton organization (GO:0051493)	528	8	2.69	+	2.97	0.00598	0.283
regulation of viral process (GO:0050792)	198	3	1.01	+	2.97	0.0824	0.971
tight junction assembly (GO:0120192)	66	1	0.34	+	2.97	0.289	1
glucose homeostasis (GO:0042593)	198	3	1.01	+	2.97	0.0824	0.97
alpha-beta T cell differentiation (GO:0046632)	66	1	0.34	+	2.97	0.289	1
regulation of morphogenesis of a branching structure (GO:0060688)	66	1	0.34	+	2.97	0.289	1
negative regulation of cellular component organization (GO:0051129)	728	11	3.71	+	2.97	0.00133	0.0977
heart morphogenesis (GO:0003007)	265	4	1.35	+	2.96	0.0481	0.757
carbohydrate homeostasis (GO:0033500)	199	3	1.01	+	2.96	0.0834	0.966
protein autophosphorylation (GO:0046777)	199	3	1.01	+	2.96	0.0834	0.965
regulation of apoptotic process (GO:0042981)	1460	22	7.44	+	2.96	4.47e-06	0.00107
digestive system development (GO:0055123)	133	2	0.68	+	2.95	0.15	1
sensory organ development (GO:0007423)	600	9	3.06	+	2.94	0.00384	0.207
response to decreased oxygen levels (GO:0036293)	200	3	1.02	+	2.94	0.0843	0.975
negative regulation of cell development (GO:0010721)	200	3	1.02	+	2.94	0.0843	0.974
extracellular matrix organization (GO:0030198)	267	4	1.36	+	2.94	0.0492	0.769
negative regulation of phosphorylation (GO:0042326)	469	7	2.39	+	2.93	0.0107	0.38
calcium ion transport into cytosol (GO:0060402)	67	1	0.34	+	2.93	0.293	1
acute inflammatory response (GO:0002526)	67	1	0.34	+	2.93	0.293	1
regulation of endothelial cell proliferation (GO:0001936)	134	2	0.68	+	2.93	0.151	1
RNA methylation (GO:0001510)	67	1	0.34	+	2.93	0.293	1
maintenance of protein location in cell (GO:0032507)	67	1	0.34	+	2.93	0.293	1
regulation of protein processing (GO:0070613)	67	1	0.34	+	2.93	0.293	1
import across plasma membrane (GO:0098739)	134	2	0.68	+	2.93	0.151	1
regulation of anion transport (GO:0044070)	134	2	0.68	+	2.93	0.151	1
mesoderm morphogenesis (GO:0048332)	67	1	0.34	+	2.93	0.293	1
regulation of cardiac muscle contraction (GO:0055117)	67	1	0.34	+	2.93	0.293	1
autophagosome organization (GO:1905037)	67	1	0.34	+	2.93	0.293	1
extracellular structure organization (GO:0043062)	268	4	1.37	+	2.93	0.0498	0.746
carbohydrate transport (GO:0008643)	67	1	0.34	+	2.93	0.293	1
peptide hormone secretion (GO:0030072)	67	1	0.34	+	2.93	0.293	1
establishment or maintenance of cell polarity (GO:0007163)	202	3	1.03	+	2.92	0.0863	0.993
response to nutrient levels (GO:0031667)	337	5	1.72	+	2.91	0.0302	0.584
regulation of programmed cell death (GO:0043067)	1485	22	7.56	+	2.91	5.84e-06	0.00128
regulation of cellular protein localization (GO:1903827)	543	8	2.77	+	2.89	0.00702	0.317
organelle disassembly (GO:1903008)	68	1	0.35	+	2.89	0.296	1
regulation of nitric oxide biosynthetic process (GO:0045428)	68	1	0.35	+	2.89	0.296	1
nephron tubule morphogenesis (GO:0072078)	68	1	0.35	+	2.89	0.296	1
positive regulation of multicellular organismal process (GO:0051240)	1564	23	7.97	+	2.89	3.88e-06	0.000988
negative regulation of axonogenesis (GO:0050771)	68	1	0.35	+	2.89	0.296	1
tight junction organization (GO:0120193)	68	1	0.35	+	2.89	0.296	1
inorganic anion transmembrane transport (GO:0098661)	68	1	0.35	+	2.89	0.296	1
positive regulation of fibroblast proliferation (GO:0048146)	68	1	0.35	+	2.89	0.296	1
positive regulation of Ras protein signal transduction (GO:0046579)	68	1	0.35	+	2.89	0.296	1
response to organonitrogen compound (GO:0010243)	750	11	3.82	+	2.88	0.00168	0.113
cell death (GO:0008219)	887	13	4.52	+	2.88	0.000638	0.0562
regulation of actin filament-based process (GO:0032970)	410	6	2.09	+	2.87	0.0193	0.505
regulation of multicellular organismal development (GO:2000026)	1435	21	7.31	+	2.87	1.19e-05	0.00234
camera-type eye development (GO:0043010)	342	5	1.74	+	2.87	0.0319	0.603
positive regulation of protein modification process (GO:0031401)	1232	18	6.28	+	2.87	5.57e-05	0.00785
stem cell population maintenance (GO:0019827)	137	2	0.7	+	2.87	0.157	1
enzyme linked receptor protein signaling pathway (GO:0007167)	549	8	2.8	+	2.86	0.00747	0.328
regulation of anatomical structure morphogenesis (GO:0022603)	961	14	4.9	+	2.86	0.000415	0.0389
response to peptide hormone (GO:0043434)	275	4	1.4	+	2.86	0.0537	0.787
regulation of smooth muscle contraction (GO:0006940)	69	1	0.35	+	2.85	0.3	1
positive regulation of osteoblast differentiation (GO:0045669)	69	1	0.35	+	2.85	0.3	1
positive regulation of fat cell differentiation (GO:0045600)	69	1	0.35	+	2.85	0.3	1
artery morphogenesis (GO:0048844)	69	1	0.35	+	2.85	0.3	1
cardiac muscle tissue morphogenesis (GO:0055008)	69	1	0.35	+	2.85	0.3	1
positive regulation of protein localization to cell periphery (GO:1904377)	69	1	0.35	+	2.85	0.3	1
digestive system process (GO:0022600)	69	1	0.35	+	2.85	0.3	1
muscle organ development (GO:0007517)	277	4	1.41	+	2.83	0.0548	0.776
cellular response to oxidative stress (GO:0034599)	208	3	1.06	+	2.83	0.0921	1
regulation of phosphate metabolic process (GO:0019220)	1740	25	8.86	+	2.82	2.03e-06	0.000616
regulation of phosphorus metabolic process (GO:0051174)	1741	25	8.87	+	2.82	2.05e-06	0.00061
cellular response to extracellular stimulus (GO:0031668)	209	3	1.06	+	2.82	0.0931	1
endoderm development (GO:0007492)	70	1	0.36	+	2.8	0.303	1
circadian regulation of gene expression (GO:0032922)	70	1	0.36	+	2.8	0.303	1
nephron epithelium morphogenesis (GO:0072088)	70	1	0.36	+	2.8	0.303	1
RNA phosphodiester bond hydrolysis (GO:0090501)	70	1	0.36	+	2.8	0.303	1
positive regulation of neural precursor cell proliferation (GO:2000179)	70	1	0.36	+	2.8	0.303	1
pyruvate metabolic process (GO:0006090)	70	1	0.36	+	2.8	0.303	1
embryonic pattern specification (GO:0009880)	70	1	0.36	+	2.8	0.303	1
negative regulation of synaptic transmission (GO:0050805)	70	1	0.36	+	2.8	0.303	1
actin cytoskeleton reorganization (GO:0031532)	70	1	0.36	+	2.8	0.303	1
negative regulation of MAP kinase activity (GO:0043407)	70	1	0.36	+	2.8	0.303	1
visual learning (GO:0008542)	70	1	0.36	+	2.8	0.303	1
cardiac chamber morphogenesis (GO:0003206)	140	2	0.71	+	2.8	0.162	1
regulation of protein maturation (GO:1903317)	70	1	0.36	+	2.8	0.303	1
positive regulation of cell migration (GO:0030335)	562	8	2.86	+	2.79	0.00853	0.354
regulation of cell population proliferation (GO:0042127)	1689	24	8.6	+	2.79	4.1e-06	0.000997
negative regulation of apoptotic process (GO:0043066)	915	13	4.66	+	2.79	0.000846	0.0706
cell adhesion (GO:0007155)	845	12	4.3	+	2.79	0.00135	0.0975
negative regulation of protein phosphorylation (GO:0001933)	423	6	2.15	+	2.78	0.0221	0.513
vacuole organization (GO:0007033)	141	2	0.72	+	2.78	0.164	1
maintenance of cell number (GO:0098727)	141	2	0.72	+	2.78	0.164	1
regulation of cellular response to stress (GO:0080135)	636	9	3.24	+	2.78	0.00556	0.267
blood circulation (GO:0008015)	425	6	2.16	+	2.77	0.0226	0.522
positive regulation of response to wounding (GO:1903036)	71	1	0.36	+	2.77	0.307	1
nephron morphogenesis (GO:0072028)	71	1	0.36	+	2.77	0.307	1
positive regulation of molecular function (GO:0044093)	1491	21	7.59	+	2.77	2.09e-05	0.00367
cranial skeletal system development (GO:1904888)	71	1	0.36	+	2.77	0.307	1
embryonic digit morphogenesis (GO:0042733)	71	1	0.36	+	2.77	0.307	1
regulation of tyrosine phosphorylation of STAT protein (GO:0042509)	71	1	0.36	+	2.77	0.307	1
embryonic organ development (GO:0048568)	498	7	2.54	+	2.76	0.0145	0.452
regulation of localization (GO:0032879)	2847	40	14.5	+	2.76	8.66e-10	8.04e-07
biological adhesion (GO:0022610)	855	12	4.36	+	2.76	0.00149	0.105
gland development (GO:0048732)	429	6	2.19	+	2.75	0.0235	0.537
generation of precursor metabolites and energy (GO:0006091)	286	4	1.46	+	2.75	0.0602	0.816
positive regulation of cellular protein catabolic process (GO:1903364)	143	2	0.73	+	2.75	0.167	1
female pregnancy (GO:0007565)	143	2	0.73	+	2.75	0.167	1
locomotion (GO:0040011)	1216	17	6.19	+	2.74	0.000155	0.0187
regulation of symbiotic process (GO:0043903)	215	3	1.1	+	2.74	0.0992	1
movement of cell or subcellular component (GO:0006928)	1437	20	7.32	+	2.73	4.01e-05	0.00626
negative regulation of programmed cell death (GO:0043069)	935	13	4.76	+	2.73	0.00103	0.0815
mesenchyme development (GO:0060485)	216	3	1.1	+	2.73	0.1	1
lysosome organization (GO:0007040)	72	1	0.37	+	2.73	0.31	1
response to oxygen levels (GO:0070482)	216	3	1.1	+	2.73	0.1	1
regulation of defense response to virus (GO:0050688)	72	1	0.37	+	2.73	0.31	1
phosphatidylinositol-mediated signaling (GO:0048015)	72	1	0.37	+	2.73	0.31	1
positive regulation of nucleocytoplasmic transport (GO:0046824)	72	1	0.37	+	2.73	0.31	1
positive regulation of anion transport (GO:1903793)	72	1	0.37	+	2.73	0.31	1
ribosomal small subunit biogenesis (GO:0042274)	72	1	0.37	+	2.73	0.31	1
lytic vacuole organization (GO:0080171)	72	1	0.37	+	2.73	0.31	1
regulation of protein modification process (GO:0031399)	1808	25	9.21	+	2.71	3.99e-06	0.000983
regulation of cold-induced thermogenesis (GO:0120161)	145	2	0.74	+	2.71	0.171	1
positive regulation of ERK1 and ERK2 cascade (GO:0070374)	218	3	1.11	+	2.7	0.102	1
regulation of endocytosis (GO:0030100)	218	3	1.11	+	2.7	0.102	1
cell migration (GO:0016477)	873	12	4.45	+	2.7	0.00177	0.118
apical junction assembly (GO:0043297)	73	1	0.37	+	2.69	0.314	1
glycoprotein metabolic process (GO:0009100)	292	4	1.49	+	2.69	0.0639	0.855
ubiquitin-dependent ERAD pathway (GO:0030433)	73	1	0.37	+	2.69	0.314	1
tube development (GO:0035295)	949	13	4.83	+	2.69	0.00117	0.0903
coronary vasculature development (GO:0060976)	73	1	0.37	+	2.69	0.314	1
regulation of gene silencing (GO:0060968)	73	1	0.37	+	2.69	0.314	1
cellular response to unfolded protein (GO:0034620)	73	1	0.37	+	2.69	0.314	1
negative regulation of T cell proliferation (GO:0042130)	73	1	0.37	+	2.69	0.314	1
positive regulation of cell motility (GO:2000147)	585	8	2.98	+	2.68	0.0107	0.378
regulation of response to DNA damage stimulus (GO:2001020)	220	3	1.12	+	2.68	0.104	1
positive regulation of chemotaxis (GO:0050921)	147	2	0.75	+	2.67	0.175	1
regulation of cellular component biogenesis (GO:0044087)	960	13	4.89	+	2.66	0.0013	0.0963
signal transduction by p53 class mediator (GO:0072331)	74	1	0.38	+	2.65	0.317	1
negative regulation of response to DNA damage stimulus (GO:2001021)	74	1	0.38	+	2.65	0.317	1
positive regulation of DNA biosynthetic process (GO:2000573)	74	1	0.38	+	2.65	0.317	1
MAPK cascade (GO:0000165)	148	2	0.75	+	2.65	0.176	1
renal tubule morphogenesis (GO:0061333)	74	1	0.38	+	2.65	0.317	1
visual behavior (GO:0007632)	74	1	0.38	+	2.65	0.317	1
mitotic cell cycle phase transition (GO:0044772)	149	2	0.76	+	2.64	0.178	1
regulation of protein kinase activity (GO:0045859)	671	9	3.42	+	2.63	0.00775	0.335
positive regulation of cellular protein metabolic process (GO:0032270)	1570	21	8	+	2.63	4.42e-05	0.00659
cellular response to organic cyclic compound (GO:0071407)	374	5	1.91	+	2.62	0.0439	0.72
positive regulation of locomotion (GO:0040017)	599	8	3.05	+	2.62	0.0121	0.408
regulation of osteoclast differentiation (GO:0045670)	75	1	0.38	+	2.62	0.321	1
tRNA modification (GO:0006400)	75	1	0.38	+	2.62	0.321	1
negative regulation of protein polymerization (GO:0032272)	75	1	0.38	+	2.62	0.321	1
positive regulation of small GTPase mediated signal transduction (GO:0051057)	75	1	0.38	+	2.62	0.321	1
regulation of mitotic cell cycle (GO:0007346)	450	6	2.29	+	2.62	0.0287	0.596
negative regulation of cell death (GO:0060548)	1052	14	5.36	+	2.61	0.000993	0.0799
positive regulation of cellular component movement (GO:0051272)	602	8	3.07	+	2.61	0.0125	0.412
positive regulation of peptide secretion (GO:0002793)	226	3	1.15	+	2.61	0.111	1
anterior/posterior pattern specification (GO:0009952)	227	3	1.16	+	2.59	0.112	1
regulation of cellular component organization (GO:0051128)	2422	32	12.34	+	2.59	3.18e-07	0.000148
regulation of developmental process (GO:0050793)	2502	33	12.74	+	2.59	2.02e-07	9.66e-05
circulatory system process (GO:0003013)	455	6	2.32	+	2.59	0.03	0.582
negative regulation of protein metabolic process (GO:0051248)	1062	14	5.41	+	2.59	0.00109	0.0856
organelle transport along microtubule (GO:0072384)	76	1	0.39	+	2.58	0.324	1
cellular response to interleukin-1 (GO:0071347)	76	1	0.39	+	2.58	0.324	1
positive regulation of JUN kinase activity (GO:0043507)	76	1	0.39	+	2.58	0.324	1
inositol lipid-mediated signaling (GO:0048017)	76	1	0.39	+	2.58	0.324	1
protein localization to synapse (GO:0035418)	76	1	0.39	+	2.58	0.324	1
cellular response to alcohol (GO:0097306)	76	1	0.39	+	2.58	0.324	1
cellular ketone metabolic process (GO:0042180)	76	1	0.39	+	2.58	0.324	1
axo-dendritic transport (GO:0008088)	76	1	0.39	+	2.58	0.324	1
positive regulation of hydrolase activity (GO:0051345)	533	7	2.71	+	2.58	0.0201	0.48
pattern specification process (GO:0007389)	458	6	2.33	+	2.57	0.0309	0.589
regulation of microtubule cytoskeleton organization (GO:0070507)	153	2	0.78	+	2.57	0.186	1
positive regulation of leukocyte migration (GO:0002687)	153	2	0.78	+	2.57	0.186	1
anatomical structure maturation (GO:0071695)	230	3	1.17	+	2.56	0.115	1
eye development (GO:0001654)	385	5	1.96	+	2.55	0.0485	0.763
regulation of intracellular steroid hormone receptor signaling pathway (GO:0033143)	77	1	0.39	+	2.55	0.328	1
cellular response to calcium ion (GO:0071277)	77	1	0.39	+	2.55	0.328	1
odontogenesis of dentin-containing tooth (GO:0042475)	77	1	0.39	+	2.55	0.328	1
sphingolipid biosynthetic process (GO:0030148)	77	1	0.39	+	2.55	0.328	1
amino acid transmembrane transport (GO:0003333)	77	1	0.39	+	2.55	0.328	1
regulation of multicellular organismal process (GO:0051239)	2779	36	14.16	+	2.54	7.02e-08	4.26e-05
negative regulation of apoptotic signaling pathway (GO:2001234)	232	3	1.18	+	2.54	0.117	1
response to endogenous stimulus (GO:0009719)	1084	14	5.52	+	2.54	0.00132	0.097
localization of cell (GO:0051674)	1007	13	5.13	+	2.53	0.00198	0.128
cell motility (GO:0048870)	1007	13	5.13	+	2.53	0.00198	0.127
cellular response to starvation (GO:0009267)	155	2	0.79	+	2.53	0.189	1
positive regulation of small molecule metabolic process (GO:0062013)	155	2	0.79	+	2.53	0.189	1
visual system development (GO:0150063)	388	5	1.98	+	2.53	0.0498	0.746
regulation of growth (GO:0040008)	699	9	3.56	+	2.53	0.00994	0.398
regulation of protein binding (GO:0043393)	233	3	1.19	+	2.53	0.118	1
response to nitrogen compound (GO:1901698)	857	11	4.37	+	2.52	0.00459	0.234
response to abiotic stimulus (GO:0009628)	935	12	4.76	+	2.52	0.00309	0.179
regulation of oxidative stress-induced cell death (GO:1903201)	78	1	0.4	+	2.52	0.331	1
positive regulation of apoptotic signaling pathway (GO:2001235)	156	2	0.79	+	2.52	0.191	1
acyl-CoA metabolic process (GO:0006637)	78	1	0.4	+	2.52	0.331	1
thioester metabolic process (GO:0035383)	78	1	0.4	+	2.52	0.331	1
cardiac ventricle morphogenesis (GO:0003208)	78	1	0.4	+	2.52	0.331	1
negative regulation of cellular protein catabolic process (GO:1903363)	78	1	0.4	+	2.52	0.331	1
outflow tract morphogenesis (GO:0003151)	78	1	0.4	+	2.52	0.331	1
cell population proliferation (GO:0008283)	548	7	2.79	+	2.51	0.023	0.527
activation of protein kinase activity (GO:0032147)	235	3	1.2	+	2.51	0.12	1
sensory system development (GO:0048880)	392	5	2	+	2.5	0.0516	0.766
positive regulation of protein metabolic process (GO:0051247)	1647	21	8.39	+	2.5	8.72e-05	0.0117
cellular response to radiation (GO:0071478)	157	2	0.8	+	2.5	0.193	1
response to temperature stimulus (GO:0009266)	157	2	0.8	+	2.5	0.193	1
hormone metabolic process (GO:0042445)	157	2	0.8	+	2.5	0.193	1
glycoprotein biosynthetic process (GO:0009101)	236	3	1.2	+	2.5	0.122	1
regulation of transport (GO:0051049)	1893	24	9.64	+	2.49	2.7e-05	0.00449
intracellular signal transduction (GO:0035556)	1342	17	6.84	+	2.49	0.000482	0.0437
cardiac septum morphogenesis (GO:0060411)	79	1	0.4	+	2.49	0.334	1
regulation of synaptic transmission, glutamatergic (GO:0051966)	79	1	0.4	+	2.49	0.334	1
organic hydroxy compound biosynthetic process (GO:1901617)	158	2	0.8	+	2.49	0.195	1
response to retinoic acid (GO:0032526)	79	1	0.4	+	2.49	0.334	1
phospholipid biosynthetic process (GO:0008654)	158	2	0.8	+	2.49	0.195	1
ventricular septum development (GO:0003281)	79	1	0.4	+	2.49	0.334	1
regulation of protein tyrosine kinase activity (GO:0061097)	79	1	0.4	+	2.49	0.334	1
cell cycle phase transition (GO:0044770)	159	2	0.81	+	2.47	0.197	1
negative regulation of neurogenesis (GO:0050768)	159	2	0.81	+	2.47	0.197	1
muscle tissue morphogenesis (GO:0060415)	80	1	0.41	+	2.45	0.338	1
positive regulation of cation channel activity (GO:2001259)	80	1	0.41	+	2.45	0.338	1
isoprenoid metabolic process (GO:0006720)	80	1	0.41	+	2.45	0.338	1
centrosome cycle (GO:0007098)	80	1	0.41	+	2.45	0.338	1
canonical Wnt signaling pathway (GO:0060070)	80	1	0.41	+	2.45	0.338	1
metanephros development (GO:0001656)	80	1	0.41	+	2.45	0.338	1
protein dephosphorylation (GO:0006470)	160	2	0.81	+	2.45	0.198	1
regulation of ubiquitin-dependent protein catabolic process (GO:2000058)	160	2	0.81	+	2.45	0.198	1
response to glucocorticoid (GO:0051384)	80	1	0.41	+	2.45	0.338	1
negative regulation of phosphatase activity (GO:0010923)	80	1	0.41	+	2.45	0.338	1
regulation of insulin secretion involved in cellular response to glucose stimulus (GO:0061178)	80	1	0.41	+	2.45	0.338	1
striated muscle tissue development (GO:0014706)	320	4	1.63	+	2.45	0.0828	0.973
cellular response to endogenous stimulus (GO:0071495)	880	11	4.48	+	2.45	0.00557	0.266
negative regulation of phosphorus metabolic process (GO:0010563)	563	7	2.87	+	2.44	0.0261	0.554
negative regulation of phosphate metabolic process (GO:0045936)	563	7	2.87	+	2.44	0.0261	0.554
regulation of cell adhesion (GO:0030155)	724	9	3.69	+	2.44	0.0123	0.408
epithelial tube formation (GO:0072175)	161	2	0.82	+	2.44	0.2	1
positive regulation of endopeptidase activity (GO:0010950)	161	2	0.82	+	2.44	0.2	1
heart development (GO:0007507)	564	7	2.87	+	2.44	0.0263	0.557
cellular response to external stimulus (GO:0071496)	242	3	1.23	+	2.43	0.128	1
cellular modified amino acid metabolic process (GO:0006575)	162	2	0.83	+	2.42	0.202	1
[truncated: 13,784 more rows]

## Sheet: Sheet4
go	ref	obs	expected	pos.neg	fold.enrich	raw.p.value	fdr
positive regulation of central tolerance induction (GO:0002648)	1	1	0.01	+	> 100	0.0143	0.355
regulation of central tolerance induction (GO:0002646)	1	1	0.01	+	> 100	0.0143	0.354
pyrimidine deoxyribonucleoside catabolic process (GO:0046127)	1	1	0.01	+	> 100	0.0143	0.354
positive regulation of growth factor dependent skeletal muscle satellite cell proliferation (GO:1902728)	2	2	0.01	+	> 100	0.000304	0.0246
positive regulation of skeletal muscle satellite cell proliferation (GO:1902724)	2	2	0.01	+	> 100	0.000304	0.0245
vitamin E biosynthetic process (GO:0010189)	1	1	0.01	+	> 100	0.0143	0.353
rhombomere 5 formation (GO:0021666)	1	1	0.01	+	> 100	0.0143	0.353
rhombomere 5 structural organization (GO:0021665)	1	1	0.01	+	> 100	0.0143	0.352
rhombomere 5 morphogenesis (GO:0021664)	1	1	0.01	+	> 100	0.0143	0.352
rhombomere 3 formation (GO:0021660)	1	1	0.01	+	> 100	0.0143	0.351
rhombomere 3 structural organization (GO:0021659)	1	1	0.01	+	> 100	0.0143	0.351
negative regulation of axon guidance (GO:1902668)	1	1	0.01	+	> 100	0.0143	0.35
host programmed cell death induced by symbiont (GO:0034050)	1	1	0.01	+	> 100	0.0143	0.35
response to triglyceride (GO:0034014)	1	1	0.01	+	> 100	0.0143	0.349
rhombomere structural organization (GO:0021595)	1	1	0.01	+	> 100	0.0143	0.348
rhombomere formation (GO:0021594)	1	1	0.01	+	> 100	0.0143	0.348
negative regulation of death-inducing signaling complex assembly (GO:1903073)	1	1	0.01	+	> 100	0.0143	0.347
regulation of death-inducing signaling complex assembly (GO:1903072)	1	1	0.01	+	> 100	0.0143	0.347
vesicle-mediated intercellular transport (GO:0110077)	1	1	0.01	+	> 100	0.0143	0.346
beta-alanine transport (GO:0001762)	1	1	0.01	+	> 100	0.0143	0.346
negative regulation of cellular pH reduction (GO:0032848)	1	1	0.01	+	> 100	0.0143	0.345
GPI anchor release (GO:0006507)	1	1	0.01	+	> 100	0.0143	0.345
positive regulation of deadenylation-independent decapping of nuclear-transcribed mRNA (GO:1901835)	1	1	0.01	+	> 100	0.0143	0.344
regulation of deadenylation-independent decapping of nuclear-transcribed mRNA (GO:1901834)	1	1	0.01	+	> 100	0.0143	0.344
cellular response to lipid hydroperoxide (GO:0071449)	1	1	0.01	+	> 100	0.0143	0.343
cellular response to triglyceride (GO:0071401)	1	1	0.01	+	> 100	0.0143	0.343
protein depalmitoleylation (GO:1990697)	1	1	0.01	+	> 100	0.0143	0.342
histone H4-K16 deacetylation (GO:1990678)	1	1	0.01	+	> 100	0.0143	0.342
cellular response to iron(II) ion (GO:0071282)	1	1	0.01	+	> 100	0.0143	0.341
thymidine catabolic process (GO:0006214)	1	1	0.01	+	> 100	0.0143	0.341
cellular response to tumor cell (GO:0071228)	1	1	0.01	+	> 100	0.0143	0.34
fermentation (GO:0006113)	1	1	0.01	+	> 100	0.0143	0.34
regulation of cysteine metabolic process (GO:1901494)	1	1	0.01	+	> 100	0.0143	0.339
mineralocorticoid receptor signaling pathway (GO:0031959)	1	1	0.01	+	> 100	0.0143	0.339
negative regulation of retinal ganglion cell axon guidance (GO:0090260)	1	1	0.01	+	> 100	0.0143	0.338
convergent extension involved in somitogenesis (GO:0090246)	1	1	0.01	+	> 100	0.0143	0.338
negative regulation of canonical Wnt signaling pathway involved in controlling type B pancreatic cell proliferation (GO:2000080)	1	1	0.01	+	> 100	0.0143	0.337
stromal-epithelial cell signaling involved in prostate gland development (GO:0044345)	1	1	0.01	+	> 100	0.0143	0.337
negative regulation of cell adhesion involved in sprouting angiogenesis (GO:0106089)	1	1	0.01	+	> 100	0.0143	0.336
regulation of cell adhesion involved in sprouting angiogenesis (GO:0106088)	1	1	0.01	+	> 100	0.0143	0.336
induction of negative chemotaxis (GO:0050929)	1	1	0.01	+	> 100	0.0143	0.335
positive regulation of negative chemotaxis (GO:0050924)	1	1	0.01	+	> 100	0.0143	0.335
positive regulation of lung ciliated cell differentiation (GO:1901248)	1	1	0.01	+	> 100	0.0143	0.334
regulation of lung ciliated cell differentiation (GO:1901246)	1	1	0.01	+	> 100	0.0143	0.334
detection of cold stimulus involved in thermoception (GO:0120169)	1	1	0.01	+	> 100	0.0143	0.333
corticosterone secretion (GO:0035934)	1	1	0.01	+	> 100	0.0143	0.333
glucocorticoid secretion (GO:0035933)	1	1	0.01	+	> 100	0.0143	0.332
interleukin-27-mediated signaling pathway (GO:0070106)	1	1	0.01	+	> 100	0.0143	0.332
regulation of protein localization to adherens junction (GO:1904702)	1	1	0.01	+	> 100	0.0143	0.331
histone H3-Y41 phosphorylation (GO:0035409)	1	1	0.01	+	> 100	0.0143	0.331
histone-tyrosine phosphorylation (GO:0035406)	1	1	0.01	+	> 100	0.0143	0.33
sensory perception of cold stimulus (GO:0062035)	1	1	0.01	+	> 100	0.0143	0.33
negative regulation of polynucleotide adenylyltransferase activity (GO:1904246)	1	1	0.01	+	> 100	0.0143	0.329
cell motility in response to calcium ion (GO:0097231)	1	1	0.01	+	> 100	0.0143	0.329
regulation of cell proliferation involved in tissue homeostasis (GO:0060784)	1	1	0.01	+	> 100	0.0143	0.328
epithelial cell proliferation involved in prostate gland development (GO:0060767)	1	1	0.01	+	> 100	0.0143	0.328
positive regulation of central B cell tolerance induction (GO:0002897)	1	1	0.01	+	> 100	0.0143	0.327
regulation of central B cell tolerance induction (GO:0002895)	1	1	0.01	+	> 100	0.0143	0.327
corticospinal neuron axon guidance through spinal cord (GO:0021972)	1	1	0.01	+	> 100	0.0143	0.326
glucose catabolic process to lactate via pyruvate (GO:0019661)	1	1	0.01	+	> 100	0.0143	0.326
glycolytic fermentation (GO:0019660)	1	1	0.01	+	> 100	0.0143	0.325
glucose catabolic process to lactate (GO:0019659)	1	1	0.01	+	> 100	0.0143	0.325
dense core granule biogenesis (GO:0061110)	1	1	0.01	+	> 100	0.0143	0.324
seminal vesicle epithelium development (GO:0061108)	1	1	0.01	+	> 100	0.0143	0.324
epithelial cell proliferation involved in prostatic bud elongation (GO:0060517)	1	1	0.01	+	> 100	0.0143	0.324
cellular response to heparin (GO:0071504)	4	3	0.03	+	> 100	1.24e-05	0.00228
positive regulation of TRAIL-activated apoptotic signaling pathway (GO:1903984)	3	2	0.02	+	92.19	0.000505	0.0383
response to heparin (GO:0071503)	5	3	0.04	+	82.97	1.98e-05	0.00316
positive regulation of B cell tolerance induction (GO:0002663)	2	1	0.01	+	69.14	0.0214	0.434
regulation of B cell tolerance induction (GO:0002661)	2	1	0.01	+	69.14	0.0214	0.433
negative regulation of germinal center formation (GO:0002635)	2	1	0.01	+	69.14	0.0214	0.433
isoprenoid biosynthetic process via mevalonate (GO:1902767)	2	1	0.01	+	69.14	0.0214	0.432
response to lipid hydroperoxide (GO:0006982)	2	1	0.01	+	69.14	0.0214	0.432
farnesyl diphosphate biosynthetic process, mevalonate pathway (GO:0010142)	2	1	0.01	+	69.14	0.0214	0.431
central tolerance induction (GO:0002508)	2	1	0.01	+	69.14	0.0214	0.431
rhombomere 3 morphogenesis (GO:0021658)	2	1	0.01	+	69.14	0.0214	0.43
regulation of TRAIL-activated apoptotic signaling pathway (GO:1903121)	4	2	0.03	+	69.14	0.000754	0.0511
regulation of exocyst assembly (GO:0001928)	2	1	0.01	+	69.14	0.0214	0.429
cell-cell signaling involved in metanephros development (GO:0072204)	2	1	0.01	+	69.14	0.0214	0.429
negative regulation of dendritic cell differentiation (GO:2001199)	4	2	0.03	+	69.14	0.000754	0.0508
negative regulation of complement activation, lectin pathway (GO:0001869)	2	1	0.01	+	69.14	0.0214	0.428
regulation of complement activation, lectin pathway (GO:0001868)	2	1	0.01	+	69.14	0.0214	0.428
male germ-line sex determination (GO:0019100)	2	1	0.01	+	69.14	0.0214	0.427
trophectodermal cell fate commitment (GO:0001830)	2	1	0.01	+	69.14	0.0214	0.427
negative regulation of relaxation of cardiac muscle (GO:1901898)	2	1	0.01	+	69.14	0.0214	0.426
negative regulation of hepatic stellate cell activation (GO:2000490)	2	1	0.01	+	69.14	0.0214	0.426
neural crest cell fate commitment (GO:0014034)	2	1	0.01	+	69.14	0.0214	0.425
uracil catabolic process (GO:0006212)	2	1	0.01	+	69.14	0.0214	0.425
calcitonin gene-related peptide receptor signaling pathway (GO:1990408)	2	1	0.01	+	69.14	0.0214	0.424
regulation of canonical Wnt signaling pathway involved in controlling type B pancreatic cell proliferation (GO:2000079)	2	1	0.01	+	69.14	0.0214	0.423
negative regulation of Wnt signaling pathway involved in dorsal/ventral axis specification (GO:2000054)	2	1	0.01	+	69.14	0.0214	0.423
regulation of Wnt signaling pathway involved in dorsal/ventral axis specification (GO:2000053)	2	1	0.01	+	69.14	0.0214	0.422
positive regulation of high-density lipoprotein particle assembly (GO:0090108)	2	1	0.01	+	69.14	0.0214	0.422
glial cell projection elongation (GO:0106091)	2	1	0.01	+	69.14	0.0214	0.421
negative regulation of lung goblet cell differentiation (GO:1901250)	2	1	0.01	+	69.14	0.0214	0.421
regulation of lung goblet cell differentiation (GO:1901249)	2	1	0.01	+	69.14	0.0214	0.42
positive regulation of uterine smooth muscle relaxation (GO:1900721)	2	1	0.01	+	69.14	0.0214	0.42
regulation of uterine smooth muscle relaxation (GO:1900719)	2	1	0.01	+	69.14	0.0214	0.419
corticosteroid hormone secretion (GO:0035930)	2	1	0.01	+	69.14	0.0214	0.419
Fas signaling pathway (GO:0036337)	2	1	0.01	+	69.14	0.0214	0.418
innate vocalization behavior (GO:0098582)	2	1	0.01	+	69.14	0.0214	0.418
negative regulation of beta-catenin-TCF complex assembly (GO:1904864)	2	1	0.01	+	69.14	0.0214	0.417
regulation of beta-catenin-TCF complex assembly (GO:1904863)	2	1	0.01	+	69.14	0.0214	0.417
negative regulation of interleukin-6-mediated signaling pathway (GO:0070104)	2	1	0.01	+	69.14	0.0214	0.416
CD8-positive, alpha-beta T cell lineage commitment (GO:0043375)	2	1	0.01	+	69.14	0.0214	0.416
interleukin-12-mediated signaling pathway (GO:0035722)	2	1	0.01	+	69.14	0.0214	0.415
positive regulation of metalloendopeptidase activity (GO:1904685)	2	1	0.01	+	69.14	0.0214	0.415
negative regulation of Schwann cell migration (GO:1900148)	2	1	0.01	+	69.14	0.0214	0.414
positive regulation of high-density lipoprotein particle clearance (GO:0010983)	2	1	0.01	+	69.14	0.0214	0.414
cellular stress response to acid chemical (GO:0097533)	2	1	0.01	+	69.14	0.0214	0.413
stress response to acid chemical (GO:0097532)	2	1	0.01	+	69.14	0.0214	0.413
regulation of polynucleotide adenylyltransferase activity (GO:1904245)	2	1	0.01	+	69.14	0.0214	0.412
cell-cell signaling involved in kidney development (GO:0060995)	2	1	0.01	+	69.14	0.0214	0.412
negative regulation of retinal cell programmed cell death (GO:0046671)	2	1	0.01	+	69.14	0.0214	0.411
uracil metabolic process (GO:0019860)	2	1	0.01	+	69.14	0.0214	0.411
growth plate cartilage chondrocyte proliferation (GO:0003419)	2	1	0.01	+	69.14	0.0214	0.41
optic vesicle morphogenesis (GO:0003404)	2	1	0.01	+	69.14	0.0214	0.41
negative regulation of G protein-coupled receptor internalization (GO:1904021)	2	1	0.01	+	69.14	0.0214	0.409
canonical Wnt signaling pathway involved in metanephric kidney development (GO:0061290)	2	1	0.01	+	69.14	0.0214	0.409
Wnt signaling pathway involved in kidney development (GO:0061289)	2	1	0.01	+	69.14	0.0214	0.408
response to injury involved in regulation of muscle adaptation (GO:0014876)	2	1	0.01	+	69.14	0.0214	0.408
mesenchymal cell apoptotic process (GO:0097152)	2	1	0.01	+	69.14	0.0214	0.407
lung smooth muscle development (GO:0061145)	2	1	0.01	+	69.14	0.0214	0.407
corticospinal neuron axon guidance (GO:0021966)	2	1	0.01	+	69.14	0.0214	0.406
seminal vesicle development (GO:0061107)	2	1	0.01	+	69.14	0.0214	0.406
negative regulation of muscle atrophy (GO:0014736)	2	1	0.01	+	69.14	0.0214	0.405
chemorepulsion involved in postnatal olfactory bulb interneuron migration (GO:0021836)	2	1	0.01	+	69.14	0.0214	0.405
primary sex determination, germ-line (GO:0007542)	2	1	0.01	+	69.14	0.0214	0.404
primary sex determination (GO:0007538)	2	1	0.01	+	69.14	0.0214	0.404
bronchus cartilage development (GO:0060532)	2	1	0.01	+	69.14	0.0214	0.403
primary prostatic bud elongation (GO:0060516)	2	1	0.01	+	69.14	0.0214	0.403
growth hormone receptor signaling pathway via JAK-STAT (GO:0060397)	5	2	0.04	+	55.32	0.00105	0.0653
cellular response to hyperoxia (GO:0071455)	5	2	0.04	+	55.32	0.00105	0.065
positive regulation of skeletal muscle cell proliferation (GO:0014858)	5	2	0.04	+	55.32	0.00105	0.0648
germ-line sex determination (GO:0018992)	3	1	0.02	+	46.1	0.0284	0.491
thymidine metabolic process (GO:0046104)	3	1	0.02	+	46.1	0.0284	0.49
positive regulation of growth hormone receptor signaling pathway (GO:0060399)	3	1	0.02	+	46.1	0.0284	0.49
interferon-gamma-mediated signaling pathway (GO:0060333)	6	2	0.04	+	46.1	0.00139	0.0797
regulation of nitrogen utilization (GO:0006808)	3	1	0.02	+	46.1	0.0284	0.489
positive regulation of cytotoxic T cell differentiation (GO:0045585)	3	1	0.02	+	46.1	0.0284	0.488
regulation of cytotoxic T cell differentiation (GO:0045583)	3	1	0.02	+	46.1	0.0284	0.488
regulation of semaphorin-plexin signaling pathway (GO:2001260)	3	1	0.02	+	46.1	0.0284	0.487
rhombomere morphogenesis (GO:0021593)	3	1	0.02	+	46.1	0.0284	0.487
selenium compound metabolic process (GO:0001887)	3	1	0.02	+	46.1	0.0284	0.486
ureter urothelium development (GO:0072190)	3	1	0.02	+	46.1	0.0284	0.486
positive regulation of adenosine receptor signaling pathway (GO:0060168)	3	1	0.02	+	46.1	0.0284	0.485
negative regulation of smooth muscle cell chemotaxis (GO:0071672)	3	1	0.02	+	46.1	0.0284	0.485
negative regulation of granulocyte chemotaxis (GO:0071623)	3	1	0.02	+	46.1	0.0284	0.484
farnesyl diphosphate biosynthetic process (GO:0045337)	3	1	0.02	+	46.1	0.0284	0.484
renal vesicle induction (GO:0072034)	3	1	0.02	+	46.1	0.0284	0.483
positive regulation of neutrophil mediated killing of fungus (GO:0070965)	3	1	0.02	+	46.1	0.0284	0.483
regulation of neutrophil mediated killing of fungus (GO:0070953)	3	1	0.02	+	46.1	0.0284	0.482
ovarian cumulus expansion (GO:0001550)	3	1	0.02	+	46.1	0.0284	0.482
interleukin-21 production (GO:0032625)	3	1	0.02	+	46.1	0.0284	0.481
thymine catabolic process (GO:0006210)	3	1	0.02	+	46.1	0.0284	0.481
pyrimidine nucleobase catabolic process (GO:0006208)	3	1	0.02	+	46.1	0.0284	0.48
negative regulation of adenylate cyclase-activating adrenergic receptor signaling pathway involved in heart process (GO:0140199)	3	1	0.02	+	46.1	0.0284	0.48
negative regulation of planar cell polarity pathway involved in axis elongation (GO:2000041)	3	1	0.02	+	46.1	0.0284	0.479
regulation of planar cell polarity pathway involved in axis elongation (GO:2000040)	3	1	0.02	+	46.1	0.0284	0.479
membrane depolarization during atrial cardiac muscle cell action potential (GO:0098912)	3	1	0.02	+	46.1	0.0284	0.478
regulation of high-density lipoprotein particle assembly (GO:0090107)	3	1	0.02	+	46.1	0.0284	0.478
negative regulation of neutrophil chemotaxis (GO:0090024)	3	1	0.02	+	46.1	0.0284	0.477
positive regulation of relaxation of smooth muscle (GO:1901082)	3	1	0.02	+	46.1	0.0284	0.477
intestinal stem cell homeostasis (GO:0036335)	3	1	0.02	+	46.1	0.0284	0.476
microtubule sliding (GO:0051012)	3	1	0.02	+	46.1	0.0284	0.476
positive regulation of glutamate receptor signaling pathway (GO:1900451)	3	1	0.02	+	46.1	0.0284	0.475
negative regulation of cellular response to oxidative stress (GO:1900408)	3	1	0.02	+	46.1	0.0284	0.475
regulation of sulfur amino acid metabolic process (GO:0031335)	3	1	0.02	+	46.1	0.0284	0.474
gamma-aminobutyric acid biosynthetic process (GO:0009449)	3	1	0.02	+	46.1	0.0284	0.474
fused antrum stage (GO:0048165)	3	1	0.02	+	46.1	0.0284	0.473
establishment of left/right asymmetry (GO:0061966)	3	1	0.02	+	46.1	0.0284	0.473
intrahepatic bile duct development (GO:0035622)	3	1	0.02	+	46.1	0.0284	0.472
regulation of metalloendopeptidase activity (GO:1904683)	6	2	0.04	+	46.1	0.00139	0.0794
dendrite regeneration (GO:0031104)	3	1	0.02	+	46.1	0.0284	0.472
positive regulation of intracellular mRNA localization (GO:1904582)	3	1	0.02	+	46.1	0.0284	0.471
mating plug formation (GO:0042628)	3	1	0.02	+	46.1	0.0284	0.471
tripeptide transmembrane transport (GO:0035443)	3	1	0.02	+	46.1	0.0284	0.47
regulation of high-density lipoprotein particle clearance (GO:0010982)	3	1	0.02	+	46.1	0.0284	0.47
regulation of protein localization to cell-cell junction (GO:0150106)	3	1	0.02	+	46.1	0.0284	0.469
brain segmentation (GO:0035284)	3	1	0.02	+	46.1	0.0284	0.469
central nervous system segmentation (GO:0035283)	3	1	0.02	+	46.1	0.0284	0.468
glutathione transmembrane transport (GO:0034775)	3	1	0.02	+	46.1	0.0284	0.468
vitamin E metabolic process (GO:0042360)	3	1	0.02	+	46.1	0.0284	0.467
neuroblast migration (GO:0097402)	3	1	0.02	+	46.1	0.0284	0.467
regulation of glutathione biosynthetic process (GO:1903786)	3	1	0.02	+	46.1	0.0284	0.466
post-embryonic hemopoiesis (GO:0035166)	6	2	0.04	+	46.1	0.00139	0.0791
thymine metabolic process (GO:0019859)	3	1	0.02	+	46.1	0.0284	0.466
growth plate cartilage chondrocyte growth (GO:0003430)	3	1	0.02	+	46.1	0.0284	0.465
activation of cysteine-type endopeptidase activity involved in apoptotic signaling pathway (GO:0097296)	3	1	0.02	+	46.1	0.0284	0.465
negative regulation of lamellipodium assembly (GO:0010593)	3	1	0.02	+	46.1	0.0284	0.464
regulation of transcription from RNA polymerase II promoter involved in spinal cord motor neuron fate specification (GO:0021912)	3	1	0.02	+	46.1	0.0284	0.464
regulation of neural retina development (GO:0061074)	3	1	0.02	+	46.1	0.0284	0.463
postnatal olfactory bulb interneuron migration (GO:0021827)	3	1	0.02	+	46.1	0.0284	0.463
substrate-dependent cerebral cortex tangential migration (GO:0021825)	3	1	0.02	+	46.1	0.0284	0.462
cerebral cortex tangential migration using cell-cell interactions (GO:0021823)	3	1	0.02	+	46.1	0.0284	0.462
metanephric nephron tubule morphogenesis (GO:0072282)	7	2	0.05	+	39.51	0.00178	0.0954
regulation of dendritic cell differentiation (GO:2001198)	7	2	0.05	+	39.51	0.00178	0.0951
negative regulation of amyloid precursor protein biosynthetic process (GO:0042985)	7	2	0.05	+	39.51	0.00178	0.0948
response to hyperoxia (GO:0055093)	7	2	0.05	+	39.51	0.00178	0.0945
response to laminar fluid shear stress (GO:0034616)	7	2	0.05	+	39.51	0.00178	0.0942
positive regulation of extrinsic apoptotic signaling pathway via death domain receptors (GO:1902043)	15	4	0.11	+	36.88	9.12e-06	0.0018
forebrain anterior/posterior pattern specification (GO:0021797)	4	1	0.03	+	34.57	0.0354	0.54
cochlear nucleus development (GO:0021747)	4	1	0.03	+	34.57	0.0354	0.54
negative regulation of endodermal cell differentiation (GO:1903225)	4	1	0.03	+	34.57	0.0354	0.539
pyrimidine deoxyribonucleoside metabolic process (GO:0046125)	4	1	0.03	+	34.57	0.0354	0.539
deoxyribonucleoside catabolic process (GO:0046121)	4	1	0.03	+	34.57	0.0354	0.538
regulation of MyD88-dependent toll-like receptor signaling pathway (GO:0034124)	4	1	0.03	+	34.57	0.0354	0.538
negative regulation of neutrophil migration (GO:1902623)	4	1	0.03	+	34.57	0.0354	0.537
regulation of T cell homeostatic proliferation (GO:0046013)	4	1	0.03	+	34.57	0.0354	0.537
negative regulation of adenylate cyclase-activating adrenergic receptor signaling pathway (GO:0071878)	4	1	0.03	+	34.57	0.0354	0.536
response to iron(II) ion (GO:0010040)	4	1	0.03	+	34.57	0.0354	0.536
negative regulation of B cell differentiation (GO:0045578)	4	1	0.03	+	34.57	0.0354	0.535
dorsal/ventral axon guidance (GO:0033563)	4	1	0.03	+	34.57	0.0354	0.534
rhombomere 5 development (GO:0021571)	4	1	0.03	+	34.57	0.0354	0.534
vitellogenesis (GO:0007296)	4	1	0.03	+	34.57	0.0354	0.533
rhombomere 3 development (GO:0021569)	4	1	0.03	+	34.57	0.0354	0.533
lactate biosynthetic process from pyruvate (GO:0019244)	4	1	0.03	+	34.57	0.0354	0.532
metanephric nephron tubule formation (GO:0072289)	4	1	0.03	+	34.57	0.0354	0.532
positive regulation of mesenchymal stem cell differentiation (GO:2000741)	4	1	0.03	+	34.57	0.0354	0.531
ureter smooth muscle cell differentiation (GO:0072193)	4	1	0.03	+	34.57	0.0354	0.531
ureter smooth muscle development (GO:0072191)	4	1	0.03	+	34.57	0.0354	0.53
regulation of adenosine receptor signaling pathway (GO:0060167)	4	1	0.03	+	34.57	0.0354	0.53
negative regulation of primary miRNA processing (GO:2000635)	4	1	0.03	+	34.57	0.0354	0.529
regulation of primary miRNA processing (GO:2000634)	4	1	0.03	+	34.57	0.0354	0.529
farnesyl diphosphate metabolic process (GO:0045338)	4	1	0.03	+	34.57	0.0354	0.528
protein localization to secretory granule (GO:0033366)	4	1	0.03	+	34.57	0.0354	0.528
epithelial cell proliferation involved in renal tubule morphogenesis (GO:2001013)	4	1	0.03	+	34.57	0.0354	0.527
cerebrospinal fluid secretion (GO:0033326)	4	1	0.03	+	34.57	0.0354	0.527
oncostatin-M-mediated signaling pathway (GO:0038165)	4	1	0.03	+	34.57	0.0354	0.526
astrocyte fate commitment (GO:0060018)	4	1	0.03	+	34.57	0.0354	0.526
gamma-aminobutyric acid import (GO:0051939)	4	1	0.03	+	34.57	0.0354	0.525
positive regulation of Schwann cell differentiation (GO:0014040)	4	1	0.03	+	34.57	0.0354	0.525
regulation of Schwann cell differentiation (GO:0014038)	4	1	0.03	+	34.57	0.0354	0.524
cellular response to hydroperoxide (GO:0071447)	8	2	0.06	+	34.57	0.00222	0.107
positive regulation of neutrophil mediated killing of symbiont cell (GO:0070961)	4	1	0.03	+	34.57	0.0354	0.524
positive regulation of neutrophil mediated cytotoxicity (GO:0070960)	4	1	0.03	+	34.57	0.0354	0.523
negative regulation of mitochondrial membrane permeability involved in apoptotic process (GO:1902109)	4	1	0.03	+	34.57	0.0354	0.523
cellular response to interleukin-12 (GO:0071349)	4	1	0.03	+	34.57	0.0354	0.522
protein insertion into mitochondrial outer membrane (GO:0045040)	4	1	0.03	+	34.57	0.0354	0.522
regulation of glutamate metabolic process (GO:2000211)	4	1	0.03	+	34.57	0.0354	0.522
negative regulation of serotonin uptake (GO:0051612)	4	1	0.03	+	34.57	0.0354	0.521
L-aspartate transmembrane transport (GO:0070778)	4	1	0.03	+	34.57	0.0354	0.521
regulation of adenylate cyclase-activating adrenergic receptor signaling pathway involved in heart process (GO:0140192)	4	1	0.03	+	34.57	0.0354	0.52
negative regulation of neurotransmitter uptake (GO:0051581)	4	1	0.03	+	34.57	0.0354	0.52
axis elongation involved in somitogenesis (GO:0090245)	4	1	0.03	+	34.57	0.0354	0.519
Wnt signaling pathway involved in somitogenesis (GO:0090244)	4	1	0.03	+	34.57	0.0354	0.519
L-aspartate import across plasma membrane (GO:0140009)	4	1	0.03	+	34.57	0.0354	0.518
proximal/distal axis specification (GO:0009946)	4	1	0.03	+	34.57	0.0354	0.518
detection of temperature stimulus involved in thermoception (GO:0050960)	4	1	0.03	+	34.57	0.0354	0.517
regulation of negative chemotaxis (GO:0050923)	4	1	0.03	+	34.57	0.0354	0.517
Harderian gland development (GO:0070384)	4	1	0.03	+	34.57	0.0354	0.516
lens fiber cell apoptotic process (GO:1990086)	4	1	0.03	+	34.57	0.0354	0.516
steroid hormone secretion (GO:0035929)	4	1	0.03	+	34.57	0.0354	0.515
regulation of relaxation of smooth muscle (GO:1901080)	4	1	0.03	+	34.57	0.0354	0.515
positive regulation of relaxation of muscle (GO:1901079)	4	1	0.03	+	34.57	0.0354	0.514
telomerase holoenzyme complex assembly (GO:1905323)	4	1	0.03	+	34.57	0.0354	0.514
positive regulation of calcium ion transmembrane transport via high voltage-gated calcium channel (GO:1904879)	4	1	0.03	+	34.57	0.0354	0.513
positive regulation of connective tissue replacement (GO:1905205)	4	1	0.03	+	34.57	0.0354	0.513
negative regulation of metalloendopeptidase activity (GO:1904684)	4	1	0.03	+	34.57	0.0354	0.512
regulation of intracellular mRNA localization (GO:1904580)	4	1	0.03	+	34.57	0.0354	0.512
ketone body biosynthetic process (GO:0046951)	4	1	0.03	+	34.57	0.0354	0.511
glycolipid transport (GO:0046836)	4	1	0.03	+	34.57	0.0354	0.511
negative regulation of hydrogen peroxide biosynthetic process (GO:0010730)	4	1	0.03	+	34.57	0.0354	0.511
neutrophil clearance (GO:0097350)	4	1	0.03	+	34.57	0.0354	0.51
chondrocyte hypertrophy (GO:0003415)	4	1	0.03	+	34.57	0.0354	0.51
regulation of G protein-coupled receptor internalization (GO:1904020)	4	1	0.03	+	34.57	0.0354	0.509
negative regulation of humoral immune response mediated by circulating immunoglobulin (GO:0002924)	4	1	0.03	+	34.57	0.0354	0.509
prostate gland morphogenetic growth (GO:0060737)	4	1	0.03	+	34.57	0.0354	0.508
regulation of transcription from RNA polymerase II promoter involved in ventral spinal cord interneuron specification (GO:0021913)	4	1	0.03	+	34.57	0.0354	0.508
growth plate cartilage chondrocyte differentiation (GO:0003418)	9	2	0.07	+	30.73	0.0027	0.124
response to growth hormone (GO:0060416)	14	3	0.1	+	29.63	0.000229	0.0209
regulation of amyloid precursor protein biosynthetic process (GO:0042984)	14	3	0.1	+	29.63	0.000229	0.0208
retinal ganglion cell axon guidance (GO:0031290)	19	4	0.14	+	29.11	2.04e-05	0.00321
response to selenium ion (GO:0010269)	5	1	0.04	+	27.66	0.0423	0.575
negative regulation of hypoxia-induced intrinsic apoptotic signaling pathway (GO:1903298)	5	1	0.04	+	27.66	0.0423	0.575
regulation of hypoxia-induced intrinsic apoptotic signaling pathway (GO:1903297)	5	1	0.04	+	27.66	0.0423	0.574
negative regulation of lamellipodium organization (GO:1902744)	5	1	0.04	+	27.66	0.0423	0.574
regulation of cohesin loading (GO:0071922)	5	1	0.04	+	27.66	0.0423	0.573
positive regulation of melanocyte differentiation (GO:0045636)	5	1	0.04	+	27.66	0.0423	0.573
galactolipid biosynthetic process (GO:0019375)	5	1	0.04	+	27.66	0.0423	0.572
regulation of growth hormone receptor signaling pathway (GO:0060398)	5	1	0.04	+	27.66	0.0423	0.572
negative regulation of cell adhesion molecule production (GO:0060354)	5	1	0.04	+	27.66	0.0423	0.571
positive regulation of cysteine-type endopeptidase activity involved in apoptotic signaling pathway (GO:2001269)	10	2	0.07	+	27.66	0.00322	0.138
metanephric tubule morphogenesis (GO:0072173)	10	2	0.07	+	27.66	0.00322	0.137
platelet dense granule organization (GO:0060155)	5	1	0.04	+	27.66	0.0423	0.571
galactosylceramide biosynthetic process (GO:0006682)	5	1	0.04	+	27.66	0.0423	0.57
positive regulation of high voltage-gated calcium channel activity (GO:1901843)	5	1	0.04	+	27.66	0.0423	0.57
positive regulation of protein neddylation (GO:2000436)	5	1	0.04	+	27.66	0.0423	0.569
negative regulation of protein neddylation (GO:2000435)	5	1	0.04	+	27.66	0.0423	0.569
neuroblast differentiation (GO:0014016)	5	1	0.04	+	27.66	0.0423	0.568
regulation of neutrophil mediated killing of symbiont cell (GO:0070949)	5	1	0.04	+	27.66	0.0423	0.568
negative regulation of T cell differentiation in thymus (GO:0033085)	10	2	0.07	+	27.66	0.00322	0.137
glutamate homeostasis (GO:0090461)	5	1	0.04	+	27.66	0.0423	0.567
dipeptide import across plasma membrane (GO:0140206)	5	1	0.04	+	27.66	0.0423	0.567
oligopeptide import across plasma membrane (GO:0140205)	5	1	0.04	+	27.66	0.0423	0.566
leukemia inhibitory factor signaling pathway (GO:0048861)	5	1	0.04	+	27.66	0.0423	0.566
corticosteroid receptor signaling pathway (GO:0031958)	5	1	0.04	+	27.66	0.0423	0.565
regulation of retinal ganglion cell axon guidance (GO:0090259)	5	1	0.04	+	27.66	0.0423	0.565
regulation of vesicle docking (GO:0106020)	5	1	0.04	+	27.66	0.0423	0.565
ciliary basal body organization (GO:0032053)	5	1	0.04	+	27.66	0.0423	0.564
hemidesmosome assembly (GO:0031581)	5	1	0.04	+	27.66	0.0423	0.564
renal water absorption (GO:0070295)	5	1	0.04	+	27.66	0.0423	0.563
regulation of midbrain dopaminergic neuron differentiation (GO:1904956)	5	1	0.04	+	27.66	0.0423	0.563
malate-aspartate shuttle (GO:0043490)	5	1	0.04	+	27.66	0.0423	0.562
ciliary neurotrophic factor-mediated signaling pathway (GO:0070120)	5	1	0.04	+	27.66	0.0423	0.562
tripeptide transport (GO:0042939)	5	1	0.04	+	27.66	0.0423	0.561
dipeptide transport (GO:0042938)	5	1	0.04	+	27.66	0.0423	0.561
regulation of interleukin-6-mediated signaling pathway (GO:0070103)	5	1	0.04	+	27.66	0.0423	0.56
gamma-aminobutyric acid metabolic process (GO:0009448)	5	1	0.04	+	27.66	0.0423	0.56
cellular response to ionomycin (GO:1904637)	5	1	0.04	+	27.66	0.0423	0.559
response to ionomycin (GO:1904636)	5	1	0.04	+	27.66	0.0423	0.559
cellular response to interleukin-3 (GO:0036016)	5	1	0.04	+	27.66	0.0423	0.558
response to interleukin-3 (GO:0036015)	5	1	0.04	+	27.66	0.0423	0.558
negative regulation of oocyte maturation (GO:1900194)	5	1	0.04	+	27.66	0.0423	0.557
regulation of defense response to fungus (GO:1900150)	5	1	0.04	+	27.66	0.0423	0.557
dipeptide transmembrane transport (GO:0035442)	5	1	0.04	+	27.66	0.0423	0.557
positive regulation of lipoprotein particle clearance (GO:0010986)	5	1	0.04	+	27.66	0.0423	0.556
membrane depolarization during AV node cell action potential (GO:0086045)	5	1	0.04	+	27.66	0.0423	0.556
negative regulation of triglyceride catabolic process (GO:0010897)	5	1	0.04	+	27.66	0.0423	0.555
receptor localization to non-motile cilium (GO:0097500)	5	1	0.04	+	27.66	0.0423	0.555
glutathione transport (GO:0034635)	5	1	0.04	+	27.66	0.0423	0.554
growth plate cartilage chondrocyte development (GO:0003431)	5	1	0.04	+	27.66	0.0423	0.554
intestinal epithelial structure maintenance (GO:0060729)	5	1	0.04	+	27.66	0.0423	0.553
spongiotrophoblast differentiation (GO:0060708)	5	1	0.04	+	27.66	0.0423	0.553
formation of radial glial scaffolds (GO:0021943)	5	1	0.04	+	27.66	0.0423	0.552
motor neuron apoptotic process (GO:0097049)	5	1	0.04	+	27.66	0.0423	0.552
regulation of muscle atrophy (GO:0014735)	5	1	0.04	+	27.66	0.0423	0.551
negative regulation of osteoblast proliferation (GO:0033689)	11	2	0.08	+	25.14	0.00379	0.156
growth hormone receptor signaling pathway (GO:0060396)	11	2	0.08	+	25.14	0.00379	0.155
histone H4 deacetylation (GO:0070933)	11	2	0.08	+	25.14	0.00379	0.155
cellular response to growth hormone stimulus (GO:0071378)	11	2	0.08	+	25.14	0.00379	0.155
postsynapse to nucleus signaling pathway (GO:0099527)	11	2	0.08	+	25.14	0.00379	0.154
L-glutamate import across plasma membrane (GO:0098712)	11	2	0.08	+	25.14	0.00379	0.154
CD8-positive, alpha-beta T cell differentiation (GO:0043374)	11	2	0.08	+	25.14	0.00379	0.153
negative regulation of sprouting angiogenesis (GO:1903671)	11	2	0.08	+	25.14	0.00379	0.153
negative regulation of humoral immune response (GO:0002921)	11	2	0.08	+	25.14	0.00379	0.153
response to hydroperoxide (GO:0033194)	17	3	0.12	+	24.4	0.000378	0.03
negative regulation of cardiac muscle hypertrophy in response to stress (GO:1903243)	6	1	0.04	+	23.05	0.0492	0.618
regulation of endodermal cell differentiation (GO:1903224)	6	1	0.04	+	23.05	0.0492	0.618
negative regulation of protein targeting to mitochondrion (GO:1903215)	6	1	0.04	+	23.05	0.0492	0.617
renal water transport (GO:0003097)	6	1	0.04	+	23.05	0.0492	0.617
negative regulation of T-helper 2 cell differentiation (GO:0045629)	6	1	0.04	+	23.05	0.0492	0.616
glutamine transport (GO:0006868)	6	1	0.04	+	23.05	0.0492	0.616
lactate biosynthetic process (GO:0019249)	6	1	0.04	+	23.05	0.0492	0.615
regulation of mesenchymal stem cell differentiation (GO:2000739)	6	1	0.04	+	23.05	0.0492	0.615
response to tumor cell (GO:0002347)	6	1	0.04	+	23.05	0.0492	0.614
pre-B cell differentiation (GO:0002329)	6	1	0.04	+	23.05	0.0492	0.614
B cell lineage commitment (GO:0002326)	6	1	0.04	+	23.05	0.0492	0.613
metanephric tubule formation (GO:0072174)	6	1	0.04	+	23.05	0.0492	0.613
regulation of smooth muscle cell chemotaxis (GO:0071671)	6	1	0.04	+	23.05	0.0492	0.612
triglyceride mobilization (GO:0006642)	6	1	0.04	+	23.05	0.0492	0.612
L-glutamate import (GO:0051938)	12	2	0.09	+	23.05	0.0044	0.169
cellular response to laminar fluid shear stress (GO:0071499)	6	1	0.04	+	23.05	0.0492	0.611
left/right axis specification (GO:0070986)	12	2	0.09	+	23.05	0.0044	0.168
negative regulation of peptidyl-cysteine S-nitrosylation (GO:1902083)	6	1	0.04	+	23.05	0.0492	0.611
regulation of serotonin uptake (GO:0051611)	6	1	0.04	+	23.05	0.0492	0.61
D-aspartate import across plasma membrane (GO:0070779)	6	1	0.04	+	23.05	0.0492	0.61
D-aspartate transport (GO:0070777)	6	1	0.04	+	23.05	0.0492	0.609
stem cell fate commitment (GO:0048865)	6	1	0.04	+	23.05	0.0492	0.609
regulation of Cdc42 protein signal transduction (GO:0032489)	6	1	0.04	+	23.05	0.0492	0.608
negative regulation of mitochondrial calcium ion concentration (GO:0051562)	6	1	0.04	+	23.05	0.0492	0.608
response to interleukin-12 (GO:0070671)	6	1	0.04	+	23.05	0.0492	0.608
intracellular pH elevation (GO:0051454)	6	1	0.04	+	23.05	0.0492	0.607
smooth muscle cell proliferation (GO:0048659)	6	1	0.04	+	23.05	0.0492	0.607
negative regulation of monocyte chemotaxis (GO:0090027)	6	1	0.04	+	23.05	0.0492	0.606
mucociliary clearance (GO:0120197)	6	1	0.04	+	23.05	0.0492	0.606
negative regulation of relaxation of muscle (GO:1901078)	6	1	0.04	+	23.05	0.0492	0.605
positive regulation of response to reactive oxygen species (GO:1901033)	6	1	0.04	+	23.05	0.0492	0.605
positive regulation of retinoic acid receptor signaling pathway (GO:0048386)	6	1	0.04	+	23.05	0.0492	0.604
cellular response to increased oxygen levels (GO:0036295)	12	2	0.09	+	23.05	0.0044	0.168
negative regulation of chemokine-mediated signaling pathway (GO:0070100)	6	1	0.04	+	23.05	0.0492	0.604
alkanesulfonate transport (GO:0042918)	6	1	0.04	+	23.05	0.0492	0.603
negative regulation of mitochondrial membrane permeability (GO:0035795)	6	1	0.04	+	23.05	0.0492	0.603
positive regulation of hydrogen peroxide-induced cell death (GO:1905206)	6	1	0.04	+	23.05	0.0492	0.602
regulation of connective tissue replacement (GO:1905203)	6	1	0.04	+	23.05	0.0492	0.602
negative regulation of metallopeptidase activity (GO:1905049)	6	1	0.04	+	23.05	0.0492	0.601
cyclic nucleotide catabolic process (GO:0009214)	6	1	0.04	+	23.05	0.0492	0.601
nuclear-transcribed mRNA catabolic process, deadenylation-independent decay (GO:0031086)	6	1	0.04	+	23.05	0.0492	0.6
amylin receptor signaling pathway (GO:0097647)	6	1	0.04	+	23.05	0.0492	0.6
negative regulation of glial cell migration (GO:1903976)	6	1	0.04	+	23.05	0.0492	0.6
Roundabout signaling pathway (GO:0035385)	6	1	0.04	+	23.05	0.0492	0.599
taurine transport (GO:0015734)	6	1	0.04	+	23.05	0.0492	0.599
fat-soluble vitamin biosynthetic process (GO:0042362)	6	1	0.04	+	23.05	0.0492	0.598
negative regulation of plasminogen activation (GO:0010757)	6	1	0.04	+	23.05	0.0492	0.598
T follicular helper cell differentiation (GO:0061470)	6	1	0.04	+	23.05	0.0492	0.597
regulation of retinal cell programmed cell death (GO:0046668)	6	1	0.04	+	23.05	0.0492	0.597
cardiac muscle cell apoptotic process (GO:0010659)	6	1	0.04	+	23.05	0.0492	0.596
striated muscle cell apoptotic process (GO:0010658)	6	1	0.04	+	23.05	0.0492	0.596
neutrophil differentiation (GO:0030223)	6	1	0.04	+	23.05	0.0492	0.595
glycosylceramide biosynthetic process (GO:0046476)	6	1	0.04	+	23.05	0.0492	0.595
regulation of skeletal muscle satellite cell proliferation (GO:0014842)	12	2	0.09	+	23.05	0.0044	0.167
regulation of branching involved in prostate gland morphogenesis (GO:0060687)	6	1	0.04	+	23.05	0.0492	0.594
positive regulation of tau-protein kinase activity (GO:1902949)	6	1	0.04	+	23.05	0.0492	0.594
anterior head development (GO:0097065)	6	1	0.04	+	23.05	0.0492	0.594
negative regulation of muscle adaptation (GO:0014745)	12	2	0.09	+	23.05	0.0044	0.167
response to granulocyte macrophage colony-stimulating factor (GO:0097012)	12	2	0.09	+	23.05	0.0044	0.167
metanephric nephron tubule development (GO:0072234)	13	2	0.09	+	21.28	0.00506	0.183
regulation of high voltage-gated calcium channel activity (GO:1901841)	13	2	0.09	+	21.28	0.00506	0.183
cerebrospinal fluid circulation (GO:0090660)	13	2	0.09	+	21.28	0.00506	0.182
regulation of skeletal muscle fiber development (GO:0048742)	13	2	0.09	+	21.28	0.00506	0.182
positive regulation of astrocyte differentiation (GO:0048711)	13	2	0.09	+	21.28	0.00506	0.181
forebrain dorsal/ventral pattern formation (GO:0021798)	7	1	0.05	+	19.76	0.056	0.653
activation-induced cell death of T cells (GO:0006924)	7	1	0.05	+	19.76	0.056	0.653
regulation of melanocyte differentiation (GO:0045634)	7	1	0.05	+	19.76	0.056	0.652
glomerular epithelial cell differentiation (GO:0072311)	14	2	0.1	+	19.76	0.00575	0.199
negative regulation of regulatory T cell differentiation (GO:0045590)	7	1	0.05	+	19.76	0.056	0.652
lens induction in camera-type eye (GO:0060235)	7	1	0.05	+	19.76	0.056	0.651
estrogen biosynthetic process (GO:0006703)	7	1	0.05	+	19.76	0.056	0.651
glomerular visceral epithelial cell differentiation (GO:0072112)	14	2	0.1	+	19.76	0.00575	0.198
galactosylceramide metabolic process (GO:0006681)	7	1	0.05	+	19.76	0.056	0.65
negative regulation of mononuclear cell migration (GO:0071676)	7	1	0.05	+	19.76	0.056	0.65
outer mitochondrial membrane organization (GO:0007008)	7	1	0.05	+	19.76	0.056	0.649
regulation of cellular pH reduction (GO:0032847)	7	1	0.05	+	19.76	0.056	0.649
lacrimal gland development (GO:0032808)	7	1	0.05	+	19.76	0.056	0.648
regulation of relaxation of cardiac muscle (GO:1901897)	7	1	0.05	+	19.76	0.056	0.648
positive regulation of neuron maturation (GO:0014042)	7	1	0.05	+	19.76	0.056	0.647
clustering of voltage-gated sodium channels (GO:0045162)	7	1	0.05	+	19.76	0.056	0.647
regulation of neutrophil mediated cytotoxicity (GO:0070948)	7	1	0.05	+	19.76	0.056	0.646
antral ovarian follicle growth (GO:0001547)	7	1	0.05	+	19.76	0.056	0.646
lipid export from cell (GO:0140353)	7	1	0.05	+	19.76	0.056	0.645
regulation of keratinocyte apoptotic process (GO:1902172)	7	1	0.05	+	19.76	0.056	0.645
positive regulation of fibroblast apoptotic process (GO:2000271)	7	1	0.05	+	19.76	0.056	0.644
positive regulation of hematopoietic stem cell proliferation (GO:1902035)	7	1	0.05	+	19.76	0.056	0.644
negative regulation of platelet aggregation (GO:0090331)	14	2	0.1	+	19.76	0.00575	0.198
positive regulation of cell proliferation involved in heart morphogenesis (GO:2000138)	7	1	0.05	+	19.76	0.056	0.644
purine nucleobase catabolic process (GO:0006145)	7	1	0.05	+	19.76	0.056	0.643
response to nitrosative stress (GO:0051409)	7	1	0.05	+	19.76	0.056	0.643
positive regulation of pigment cell differentiation (GO:0050942)	7	1	0.05	+	19.76	0.056	0.642
positive regulation of miRNA mediated inhibition of translation (GO:1905618)	7	1	0.05	+	19.76	0.056	0.642
regulation of miRNA mediated inhibition of translation (GO:1905616)	7	1	0.05	+	19.76	0.056	0.641
inhibition of cysteine-type endopeptidase activity involved in apoptotic process (GO:1990001)	7	1	0.05	+	19.76	0.056	0.641
negative regulation of membrane protein ectodomain proteolysis (GO:0051045)	7	1	0.05	+	19.76	0.056	0.64
negative regulation of lipoprotein lipase activity (GO:0051005)	7	1	0.05	+	19.76	0.056	0.64
response to increased oxygen levels (GO:0036296)	14	2	0.1	+	19.76	0.00575	0.197
interleukin-6-mediated signaling pathway (GO:0070102)	14	2	0.1	+	19.76	0.00575	0.197
regulation of glutamate receptor signaling pathway (GO:1900449)	7	1	0.05	+	19.76	0.056	0.639
otic vesicle formation (GO:0030916)	7	1	0.05	+	19.76	0.056	0.639
regulation of chemokine-mediated signaling pathway (GO:0070099)	7	1	0.05	+	19.76	0.056	0.638
oligopeptide transmembrane transport (GO:0035672)	7	1	0.05	+	19.76	0.056	0.638
calcitonin family receptor signaling pathway (GO:0097646)	7	1	0.05	+	19.76	0.056	0.637
negative regulation of tyrosine phosphorylation of STAT protein (GO:0042532)	14	2	0.1	+	19.76	0.00575	0.197
AV node cell to bundle of His cell signaling (GO:0086027)	7	1	0.05	+	19.76	0.056	0.637
AV node cell action potential (GO:0086016)	7	1	0.05	+	19.76	0.056	0.637
negative regulation of hydrogen peroxide metabolic process (GO:0010727)	7	1	0.05	+	19.76	0.056	0.636
muscle cell apoptotic process (GO:0010657)	7	1	0.05	+	19.76	0.056	0.636
negative regulation of Schwann cell proliferation (GO:0010626)	7	1	0.05	+	19.76	0.056	0.635
negative regulation of cardiac muscle adaptation (GO:0010616)	7	1	0.05	+	19.76	0.056	0.635
renal filtration cell differentiation (GO:0061318)	14	2	0.1	+	19.76	0.00575	0.196
L-ascorbic acid metabolic process (GO:0019852)	7	1	0.05	+	19.76	0.056	0.634
negative regulation of photoreceptor cell differentiation (GO:0046533)	7	1	0.05	+	19.76	0.056	0.634
mammary duct terminal end bud growth (GO:0060763)	7	1	0.05	+	19.76	0.056	0.633
intercellular transport (GO:0010496)	7	1	0.05	+	19.76	0.056	0.633
positive regulation of cell fate commitment (GO:0010455)	7	1	0.05	+	19.76	0.056	0.632
release of sequestered calcium ion into cytosol by sarcoplasmic reticulum (GO:0014808)	7	1	0.05	+	19.76	0.056	0.632
negative regulation of complement activation (GO:0045916)	7	1	0.05	+	19.76	0.056	0.632
pH elevation (GO:0045852)	7	1	0.05	+	19.76	0.056	0.631
regulation of branching involved in lung morphogenesis (GO:0061046)	7	1	0.05	+	19.76	0.056	0.631
cerebral cortex tangential migration (GO:0021800)	7	1	0.05	+	19.76	0.056	0.63
amino acid homeostasis (GO:0080144)	7	1	0.05	+	19.76	0.056	0.63
prostate epithelial cord arborization involved in prostate glandular acinus morphogenesis (GO:0060527)	7	1	0.05	+	19.76	0.056	0.629
prostate glandular acinus morphogenesis (GO:0060526)	7	1	0.05	+	19.76	0.056	0.629
type I pneumocyte differentiation (GO:0060509)	7	1	0.05	+	19.76	0.056	0.628
metanephric nephron epithelium development (GO:0072243)	15	2	0.11	+	18.44	0.00649	0.214
histone H3 deacetylation (GO:0070932)	15	2	0.11	+	18.44	0.00649	0.214
CD8-positive, alpha-beta T cell activation (GO:0036037)	15	2	0.11	+	18.44	0.00649	0.213
chondrocyte differentiation involved in endochondral bone morphogenesis (GO:0003413)	15	2	0.11	+	18.44	0.00649	0.213
negative regulation of glycoprotein biosynthetic process (GO:0010561)	15	2	0.11	+	18.44	0.00649	0.213
regulation of skeletal muscle cell proliferation (GO:0014857)	15	2	0.11	+	18.44	0.00649	0.212
protein refolding (GO:0042026)	15	2	0.11	+	18.44	0.00649	0.212
pyrimidine nucleoside catabolic process (GO:0046135)	8	1	0.06	+	17.29	0.0628	0.687
positive regulation of chondrocyte proliferation (GO:1902732)	8	1	0.06	+	17.29	0.0628	0.686
inflammatory cell apoptotic process (GO:0006925)	8	1	0.06	+	17.29	0.0628	0.686
positive regulation of tissue remodeling (GO:0034105)	8	1	0.06	+	17.29	0.0628	0.685
positive regulation of T-helper 1 cell differentiation (GO:0045627)	8	1	0.06	+	17.29	0.0628	0.685
galactolipid metabolic process (GO:0019374)	8	1	0.06	+	17.29	0.0628	0.685
glomerular epithelial cell development (GO:0072310)	8	1	0.06	+	17.29	0.0628	0.684
regulation of cysteine-type endopeptidase activity involved in apoptotic signaling pathway (GO:2001267)	16	2	0.12	+	17.29	0.00727	0.226
metanephric glomerulus development (GO:0072224)	8	1	0.06	+	17.29	0.0628	0.684
myeloid progenitor cell differentiation (GO:0002318)	8	1	0.06	+	17.29	0.0628	0.683
regulation of CD8-positive, alpha-beta T cell proliferation (GO:2000564)	8	1	0.06	+	17.29	0.0628	0.683
positive regulation of protein glycosylation (GO:0060050)	8	1	0.06	+	17.29	0.0628	0.682
glomerular visceral epithelial cell development (GO:0072015)	8	1	0.06	+	17.29	0.0628	0.682
glomerular epithelium development (GO:0072010)	16	2	0.12	+	17.29	0.00727	0.225
convergent extension involved in axis elongation (GO:0060028)	8	1	0.06	+	17.29	0.0628	0.681
convergent extension involved in gastrulation (GO:0060027)	8	1	0.06	+	17.29	0.0628	0.681
neuron projection extension involved in neuron projection guidance (GO:1902284)	8	1	0.06	+	17.29	0.0628	0.68
p38MAPK cascade (GO:0038066)	8	1	0.06	+	17.29	0.0628	0.68
cellular response to X-ray (GO:0071481)	8	1	0.06	+	17.29	0.0628	0.679
neural crest formation (GO:0014029)	8	1	0.06	+	17.29	0.0628	0.679
immunoglobulin V(D)J recombination (GO:0033152)	8	1	0.06	+	17.29	0.0628	0.678
cellular response to ether (GO:0071362)	8	1	0.06	+	17.29	0.0628	0.678
axon extension involved in axon guidance (GO:0048846)	8	1	0.06	+	17.29	0.0628	0.677
positive regulation of skeletal muscle fiber development (GO:0048743)	8	1	0.06	+	17.29	0.0628	0.677
negative regulation of non-canonical Wnt signaling pathway (GO:2000051)	8	1	0.06	+	17.29	0.0628	0.677
positive regulation of male gonad development (GO:2000020)	8	1	0.06	+	17.29	0.0628	0.676
negative regulation of membrane permeability (GO:1905709)	8	1	0.06	+	17.29	0.0628	0.676
thermoception (GO:0050955)	8	1	0.06	+	17.29	0.0628	0.675
regulation of protein localization to chromatin (GO:1905634)	8	1	0.06	+	17.29	0.0628	0.675
negative regulation of inclusion body assembly (GO:0090084)	8	1	0.06	+	17.29	0.0628	0.674
negative regulation of mitochondrial outer membrane permeabilization involved in apoptotic signaling pathway (GO:1901029)	8	1	0.06	+	17.29	0.0628	0.674
activation of Janus kinase activity (GO:0042976)	8	1	0.06	+	17.29	0.0628	0.673
positive regulation of developmental pigmentation (GO:0048087)	8	1	0.06	+	17.29	0.0628	0.673
negative regulation of vascular associated smooth muscle cell differentiation (GO:1905064)	8	1	0.06	+	17.29	0.0628	0.672
regulation of metallopeptidase activity (GO:1905048)	16	2	0.12	+	17.29	0.00727	0.225
regulation of oocyte maturation (GO:1900193)	8	1	0.06	+	17.29	0.0628	0.672
regulation of Schwann cell migration (GO:1900147)	8	1	0.06	+	17.29	0.0628	0.672
deoxyribonucleoside metabolic process (GO:0009120)	8	1	0.06	+	17.29	0.0628	0.671
cellular ketone body metabolic process (GO:0046950)	8	1	0.06	+	17.29	0.0628	0.671
peptidyl-lysine deacetylation (GO:0034983)	8	1	0.06	+	17.29	0.0628	0.67
regulation of skeletal muscle acetylcholine-gated channel clustering (GO:1904393)	8	1	0.06	+	17.29	0.0628	0.67
mammalian oogenesis stage (GO:0022605)	8	1	0.06	+	17.29	0.0628	0.669
chondrocyte development involved in endochondral bone morphogenesis (GO:0003433)	8	1	0.06	+	17.29	0.0628	0.669
release of sequestered calcium ion into cytosol by endoplasmic reticulum (GO:1903514)	8	1	0.06	+	17.29	0.0628	0.668
high-density lipoprotein particle assembly (GO:0034380)	8	1	0.06	+	17.29	0.0628	0.668
common bile duct development (GO:0061009)	8	1	0.06	+	17.29	0.0628	0.667
trachea cartilage development (GO:0060534)	8	1	0.06	+	17.29	0.0628	0.667
left/right pattern formation (GO:0060972)	24	3	0.17	+	17.29	0.000936	0.06
negative regulation of cardiac muscle cell apoptotic process (GO:0010667)	33	4	0.24	+	16.76	0.00014	0.0144
neuron projection regeneration (GO:0031102)	25	3	0.18	+	16.59	0.00104	0.065
metanephric tubule development (GO:0072170)	17	2	0.12	+	16.27	0.00808	0.246
regulation of relaxation of muscle (GO:1901077)	17	2	0.12	+	16.27	0.00808	0.245
axon regeneration (GO:0031103)	17	2	0.12	+	16.27	0.00808	0.245
cellular response to interleukin-6 (GO:0071354)	26	3	0.19	+	15.96	0.00116	0.0692
negative regulation of receptor signaling pathway via STAT (GO:1904893)	26	3	0.19	+	15.96	0.00116	0.0689
regulation of glycoprotein biosynthetic process (GO:0010559)	45	5	0.33	+	15.37	2.92e-05	0.00439
regulation of cardiac muscle hypertrophy in response to stress (GO:1903242)	9	1	0.07	+	15.37	0.0695	0.713
positive regulation of AMPA receptor activity (GO:2000969)	9	1	0.07	+	15.37	0.0695	0.712
nucleobase catabolic process (GO:0046113)	9	1	0.07	+	15.37	0.0695	0.712
bone trabecula formation (GO:0060346)	9	1	0.07	+	15.37	0.0695	0.711
cellular response to epinephrine stimulus (GO:0071872)	9	1	0.07	+	15.37	0.0695	0.711
response to epinephrine (GO:0071871)	9	1	0.07	+	15.37	0.0695	0.71
tangential migration from the subventricular zone to the olfactory bulb (GO:0022028)	9	1	0.07	+	15.37	0.0695	0.71
rhombomere development (GO:0021546)	9	1	0.07	+	15.37	0.0695	0.709
negative regulation of glycoprotein metabolic process (GO:1903019)	18	2	0.13	+	15.37	0.00894	0.264
regulation of epithelial cell proliferation involved in lung morphogenesis (GO:2000794)	9	1	0.07	+	15.37	0.0695	0.709
metanephric nephron morphogenesis (GO:0072273)	18	2	0.13	+	15.37	0.00894	0.263
glutathione biosynthetic process (GO:0006750)	9	1	0.07	+	15.37	0.0695	0.708
alpha-beta T cell lineage commitment (GO:0002363)	18	2	0.13	+	15.37	0.00894	0.263
ureter morphogenesis (GO:0072197)	9	1	0.07	+	15.37	0.0695	0.708
otic vesicle morphogenesis (GO:0071600)	9	1	0.07	+	15.37	0.0695	0.708
dense core granule transport (GO:1901950)	9	1	0.07	+	15.37	0.0695	0.707
neutrophil homeostasis (GO:0001780)	18	2	0.13	+	15.37	0.00894	0.262
NADPH oxidation (GO:0070995)	9	1	0.07	+	15.37	0.0695	0.707
cellular response to follicle-stimulating hormone stimulus (GO:0071372)	9	1	0.07	+	15.37	0.0695	0.706
negative regulation of fibroblast apoptotic process (GO:2000270)	9	1	0.07	+	15.37	0.0695	0.706
regulation of peptidyl-cysteine S-nitrosylation (GO:2000169)	9	1	0.07	+	15.37	0.0695	0.705
dense core granule cytoskeletal transport (GO:0099519)	9	1	0.07	+	15.37	0.0695	0.705
regulation of glutamine family amino acid metabolic process (GO:0000820)	9	1	0.07	+	15.37	0.0695	0.704
locomotion involved in locomotory behavior (GO:0031987)	9	1	0.07	+	15.37	0.0695	0.704
cardiac muscle fiber development (GO:0048739)	9	1	0.07	+	15.37	0.0695	0.703
regulation of glutamate receptor clustering (GO:0106104)	9	1	0.07	+	15.37	0.0695	0.703
cellular water homeostasis (GO:0009992)	9	1	0.07	+	15.37	0.0695	0.703
regulation of pigment cell differentiation (GO:0050932)	9	1	0.07	+	15.37	0.0695	0.702
dense core granule localization (GO:0032253)	9	1	0.07	+	15.37	0.0695	0.702
positive regulation of extracellular matrix assembly (GO:1901203)	9	1	0.07	+	15.37	0.0695	0.701
negative regulation of vascular endothelial growth factor signaling pathway (GO:1900747)	9	1	0.07	+	15.37	0.0695	0.701
thyroid hormone transport (GO:0070327)	9	1	0.07	+	15.37	0.0695	0.7
negative regulation of cytokine secretion (GO:0050710)	18	2	0.13	+	15.37	0.00894	0.262
D-amino acid transport (GO:0042940)	9	1	0.07	+	15.37	0.0695	0.7
insulin secretion involved in cellular response to glucose stimulus (GO:0035773)	9	1	0.07	+	15.37	0.0695	0.699
regulation of AMPA glutamate receptor clustering (GO:1904717)	9	1	0.07	+	15.37	0.0695	0.699
positive regulation of metallopeptidase activity (GO:1905050)	9	1	0.07	+	15.37	0.0695	0.699
L-glutamate transmembrane transport (GO:0015813)	18	2	0.13	+	15.37	0.00894	0.261
regulation of dopaminergic neuron differentiation (GO:1904338)	9	1	0.07	+	15.37	0.0695	0.698
necroptotic signaling pathway (GO:0097527)	9	1	0.07	+	15.37	0.0695	0.698
carbon dioxide transport (GO:0015670)	9	1	0.07	+	15.37	0.0695	0.697
regulation of hydrogen peroxide biosynthetic process (GO:0010728)	9	1	0.07	+	15.37	0.0695	0.697
negative regulation of establishment of protein localization to mitochondrion (GO:1903748)	9	1	0.07	+	15.37	0.0695	0.696
inhibition of cysteine-type endopeptidase activity (GO:0097340)	9	1	0.07	+	15.37	0.0695	0.696
negative regulation of striated muscle cell apoptotic process (GO:0010664)	36	4	0.26	+	15.37	0.000191	0.0181
regulation of Schwann cell proliferation (GO:0010624)	9	1	0.07	+	15.37	0.0695	0.695
negative regulation of immunoglobulin mediated immune response (GO:0002890)	9	1	0.07	+	15.37	0.0695	0.695
corticospinal tract morphogenesis (GO:0021957)	9	1	0.07	+	15.37	0.0695	0.695
negative regulation of B cell mediated immunity (GO:0002713)	9	1	0.07	+	15.37	0.0695	0.694
olfactory bulb interneuron development (GO:0021891)	9	1	0.07	+	15.37	0.0695	0.694
interneuron migration from the subpallium to the cortex (GO:0021830)	9	1	0.07	+	15.37	0.0695	0.693
T-helper 17 cell lineage commitment (GO:0072540)	9	1	0.07	+	15.37	0.0695	0.693
positive regulation of response to oxidative stress (GO:1902884)	9	1	0.07	+	15.37	0.0695	0.692
response to interleukin-6 (GO:0070741)	28	3	0.2	+	14.82	0.00141	0.0797
negative regulation of homotypic cell-cell adhesion (GO:0034111)	19	2	0.14	+	14.56	0.00983	0.278
metanephric epithelium development (GO:0072207)	19	2	0.14	+	14.56	0.00983	0.277
acidic amino acid transport (GO:0015800)	38	4	0.27	+	14.56	0.000232	0.0209
growth plate cartilage development (GO:0003417)	19	2	0.14	+	14.56	0.00983	0.277
negative regulation of platelet activation (GO:0010544)	19	2	0.14	+	14.56	0.00983	0.276
vesicle transport along actin filament (GO:0030050)	19	2	0.14	+	14.56	0.00983	0.276
aortic valve morphogenesis (GO:0003180)	19	2	0.14	+	14.56	0.00983	0.275
regulation of extrinsic apoptotic signaling pathway via death domain receptors (GO:1902041)	49	5	0.35	+	14.11	4.26e-05	0.00575
response to lead ion (GO:0010288)	10	1	0.07	+	13.83	0.0762	0.744
positive regulation of tolerance induction (GO:0002645)	10	1	0.07	+	13.83	0.0762	0.743
regulation of germinal center formation (GO:0002634)	10	1	0.07	+	13.83	0.0762	0.743
bronchus development (GO:0060433)	10	1	0.07	+	13.83	0.0762	0.743
facial nerve structural organization (GO:0021612)	10	1	0.07	+	13.83	0.0762	0.742
nitric oxide biosynthetic process (GO:0006809)	10	1	0.07	+	13.83	0.0762	0.742
response to iron ion (GO:0010039)	20	2	0.14	+	13.83	0.0108	0.295
tyrosine phosphorylation of STAT protein (GO:0007260)	10	1	0.07	+	13.83	0.0762	0.741
response to ether (GO:0045472)	10	1	0.07	+	13.83	0.0762	0.741
glomerular basement membrane development (GO:0032836)	10	1	0.07	+	13.83	0.0762	0.74
regulation of hepatic stellate cell activation (GO:2000489)	10	1	0.07	+	13.83	0.0762	0.74
ketone body metabolic process (GO:1902224)	10	1	0.07	+	13.83	0.0762	0.739
glutamate secretion (GO:0014047)	10	1	0.07	+	13.83	0.0762	0.739
response to redox state (GO:0051775)	10	1	0.07	+	13.83	0.0762	0.738
T-helper 1 cell differentiation (GO:0045063)	10	1	0.07	+	13.83	0.0762	0.738
regulation of neutrophil apoptotic process (GO:0033029)	10	1	0.07	+	13.83	0.0762	0.738
postsynaptic endocytosis (GO:0140239)	10	1	0.07	+	13.83	0.0762	0.737
regulation of hematopoietic stem cell proliferation (GO:1902033)	10	1	0.07	+	13.83	0.0762	0.737
cellular response to electrical stimulus (GO:0071257)	10	1	0.07	+	13.83	0.0762	0.736
positive regulation of gonad development (GO:1905941)	10	1	0.07	+	13.83	0.0762	0.736
response to follicle-stimulating hormone (GO:0032354)	10	1	0.07	+	13.83	0.0762	0.735
collateral sprouting (GO:0048668)	10	1	0.07	+	13.83	0.0762	0.735
postsynaptic neurotransmitter receptor internalization (GO:0098884)	10	1	0.07	+	13.83	0.0762	0.734
peptidyl-tyrosine dephosphorylation involved in inactivation of protein kinase activity (GO:1990264)	10	1	0.07	+	13.83	0.0762	0.734
post-embryonic animal organ development (GO:0048569)	20	2	0.14	+	13.83	0.0108	0.295
CD4-positive or CD8-positive, alpha-beta T cell lineage commitment (GO:0043369)	20	2	0.14	+	13.83	0.0108	0.294
activation of MAPKKK activity (GO:0000185)	10	1	0.07	+	13.83	0.0762	0.733
negative regulation of cellular response to hypoxia (GO:1900038)	10	1	0.07	+	13.83	0.0762	0.733
intrinsic apoptotic signaling pathway in response to oxidative stress (GO:0008631)	20	2	0.14	+	13.83	0.0108	0.294
regulation of receptor clustering (GO:1903909)	20	2	0.14	+	13.83	0.0108	0.293
positive regulation of cholesterol efflux (GO:0010875)	20	2	0.14	+	13.83	0.0108	0.293
positive regulation of cGMP-mediated signaling (GO:0010753)	10	1	0.07	+	13.83	0.0762	0.733
zymogen inhibition (GO:0097341)	10	1	0.07	+	13.83	0.0762	0.732
regulation of cardiac muscle adaptation (GO:0010612)	10	1	0.07	+	13.83	0.0762	0.732
regulation of photoreceptor cell differentiation (GO:0046532)	10	1	0.07	+	13.83	0.0762	0.731
negative regulation of cell maturation (GO:1903430)	10	1	0.07	+	13.83	0.0762	0.731
substrate-independent telencephalic tangential interneuron migration (GO:0021843)	10	1	0.07	+	13.83	0.0762	0.73
substrate-independent telencephalic tangential migration (GO:0021826)	10	1	0.07	+	13.83	0.0762	0.73
regulation of glycoprotein metabolic process (GO:1903018)	50	5	0.36	+	13.83	4.66e-05	0.00618
CD4-positive, alpha-beta T cell differentiation involved in immune response (GO:0002294)	31	3	0.22	+	13.38	0.00185	0.0961
T-helper cell differentiation (GO:0042093)	31	3	0.22	+	13.38	0.00185	0.0958
negative regulation of response to oxidative stress (GO:1902883)	31	3	0.22	+	13.38	0.00185	0.0955
neuron apoptotic process (GO:0051402)	52	5	0.38	+	13.3	5.55e-05	0.00695
cell migration involved in sprouting angiogenesis (GO:0002042)	21	2	0.15	+	13.17	0.0117	0.315
cartilage condensation (GO:0001502)	21	2	0.15	+	13.17	0.0117	0.314
actin filament-based transport (GO:0099515)	21	2	0.15	+	13.17	0.0117	0.313
negative regulation of cytosolic calcium ion concentration (GO:0051481)	21	2	0.15	+	13.17	0.0117	0.313
lung epithelial cell differentiation (GO:0060487)	32	3	0.23	+	12.96	0.00201	0.101
regulation of mitochondrial membrane permeability (GO:0046902)	54	5	0.39	+	12.8	6.56e-05	0.0079
phospholipid efflux (GO:0033700)	11	1	0.08	+	12.57	0.0828	0.781
regulation of hydrogen peroxide-induced cell death (GO:1903205)	33	3	0.24	+	12.57	0.00218	0.107
lung cell differentiation (GO:0060479)	33	3	0.24	+	12.57	0.00218	0.107
regulation of cell adhesion molecule production (GO:0060353)	11	1	0.08	+	12.57	0.0828	0.78
neuronal action potential propagation (GO:0019227)	11	1	0.08	+	12.57	0.0828	0.78
negative regulation of cellular response to vascular endothelial growth factor stimulus (GO:1902548)	11	1	0.08	+	12.57	0.0828	0.779
cellular response to nitric oxide (GO:0071732)	11	1	0.08	+	12.57	0.0828	0.779
immature B cell differentiation (GO:0002327)	11	1	0.08	+	12.57	0.0828	0.778
nonribosomal peptide biosynthetic process (GO:0019184)	11	1	0.08	+	12.57	0.0828	0.778
limb bud formation (GO:0060174)	11	1	0.08	+	12.57	0.0828	0.777
alpha-beta T cell differentiation involved in immune response (GO:0002293)	33	3	0.24	+	12.57	0.00218	0.106
cysteine metabolic process (GO:0006534)	11	1	0.08	+	12.57	0.0828	0.777
regulation of protein neddylation (GO:2000434)	11	1	0.08	+	12.57	0.0828	0.776
negative regulation of translation, ncRNA-mediated (GO:0040033)	11	1	0.08	+	12.57	0.0828	0.776
positive regulation of transcription from RNA polymerase II promoter in response to endoplasmic reticulum stress (GO:1990440)	11	1	0.08	+	12.57	0.0828	0.776
regulation of male gonad development (GO:2000018)	11	1	0.08	+	12.57	0.0828	0.775
negative regulation of protein localization to cell surface (GO:2000009)	11	1	0.08	+	12.57	0.0828	0.775
glucose catabolic process (GO:0006007)	11	1	0.08	+	12.57	0.0828	0.774
positive regulation of kidney development (GO:0090184)	11	1	0.08	+	12.57	0.0828	0.774
action potential propagation (GO:0098870)	11	1	0.08	+	12.57	0.0828	0.773
cell aggregation (GO:0098743)	22	2	0.16	+	12.57	0.0127	0.332
bleb assembly (GO:0032060)	11	1	0.08	+	12.57	0.0828	0.773
regulation of sulfur metabolic process (GO:0042762)	11	1	0.08	+	12.57	0.0828	0.772
gamma-aminobutyric acid transport (GO:0015812)	11	1	0.08	+	12.57	0.0828	0.772
positive regulation of necrotic cell death (GO:0010940)	11	1	0.08	+	12.57	0.0828	0.771
ether lipid biosynthetic process (GO:0008611)	11	1	0.08	+	12.57	0.0828	0.771
AV node cell to bundle of His cell communication (GO:0086067)	11	1	0.08	+	12.57	0.0828	0.771
atrial cardiac muscle cell to AV node cell signaling (GO:0086026)	11	1	0.08	+	12.57	0.0828	0.77
atrial cardiac muscle cell action potential (GO:0086014)	11	1	0.08	+	12.57	0.0828	0.77
miRNA mediated inhibition of translation (GO:0035278)	11	1	0.08	+	12.57	0.0828	0.769
glycerol ether biosynthetic process (GO:0046504)	11	1	0.08	+	12.57	0.0828	0.769
regulation of humoral immune response mediated by circulating immunoglobulin (GO:0002923)	11	1	0.08	+	12.57	0.0828	0.768
regulation of translation, ncRNA-mediated (GO:0045974)	11	1	0.08	+	12.57	0.0828	0.768
positive regulation of cell maturation (GO:1903431)	11	1	0.08	+	12.57	0.0828	0.767
positive regulation of cerebellar granule cell precursor proliferation (GO:0021940)	11	1	0.08	+	12.57	0.0828	0.767
cellular response to granulocyte macrophage colony-stimulating factor stimulus (GO:0097011)	11	1	0.08	+	12.57	0.0828	0.766
T-helper 17 cell differentiation (GO:0072539)	11	1	0.08	+	12.57	0.0828	0.766
alpha-beta T cell activation involved in immune response (GO:0002287)	34	3	0.25	+	12.2	0.00236	0.111
regulation of astrocyte differentiation (GO:0048710)	34	3	0.25	+	12.2	0.00236	0.111
amino acid import across plasma membrane (GO:0089718)	34	3	0.25	+	12.2	0.00236	0.11
positive regulation of branching involved in ureteric bud morphogenesis (GO:0090190)	23	2	0.17	+	12.03	0.0138	0.35
detection of temperature stimulus involved in sensory perception (GO:0050961)	23	2	0.17	+	12.03	0.0138	0.349
regulation of membrane protein ectodomain proteolysis (GO:0051043)	23	2	0.17	+	12.03	0.0138	0.349
positive regulation of transcription from RNA polymerase II promoter in response to stress (GO:0036003)	23	2	0.17	+	12.03	0.0138	0.348
response to auditory stimulus (GO:0010996)	23	2	0.17	+	12.03	0.0138	0.348
response to fluid shear stress (GO:0034405)	23	2	0.17	+	12.03	0.0138	0.347
aortic valve development (GO:0003176)	23	2	0.17	+	12.03	0.0138	0.347
negative regulation of B cell activation (GO:0050869)	35	3	0.25	+	11.85	0.00255	0.117
positive regulation of extrinsic apoptotic signaling pathway (GO:2001238)	60	5	0.43	+	11.52	0.000105	0.0115
glomerular filtration (GO:0003094)	12	1	0.09	+	11.52	0.0894	0.815
negative regulation of oxidative stress-induced neuron death (GO:1903204)	24	2	0.17	+	11.52	0.0149	0.333
regulation of T-helper 1 cell differentiation (GO:0045625)	12	1	0.09	+	11.52	0.0894	0.815
cerebellar granular layer morphogenesis (GO:0021683)	12	1	0.09	+	11.52	0.0894	0.814
facial nerve morphogenesis (GO:0021610)	12	1	0.09	+	11.52	0.0894	0.814
oligopeptide transport (GO:0006857)	12	1	0.09	+	11.52	0.0894	0.813
facial nerve development (GO:0021561)	12	1	0.09	+	11.52	0.0894	0.813
receptor signaling pathway via JAK-STAT (GO:0007259)	36	3	0.26	+	11.52	0.00275	0.125
ventral spinal cord interneuron specification (GO:0021521)	12	1	0.09	+	11.52	0.0894	0.812
regulation of calcium ion transmembrane transport via high voltage-gated calcium channel (GO:1902514)	12	1	0.09	+	11.52	0.0894	0.812
receptor guanylyl cyclase signaling pathway (GO:0007168)	12	1	0.09	+	11.52	0.0894	0.811
positive regulation of MHC class II biosynthetic process (GO:0045348)	12	1	0.09	+	11.52	0.0894	0.811
vagina development (GO:0060068)	12	1	0.09	+	11.52	0.0894	0.81
positive regulation of natural killer cell differentiation (GO:0032825)	12	1	0.09	+	11.52	0.0894	0.81
negative regulation of synaptic transmission, glutamatergic (GO:0051967)	12	1	0.09	+	11.52	0.0894	0.809
leptin-mediated signaling pathway (GO:0033210)	12	1	0.09	+	11.52	0.0894	0.809
calcineurin-NFAT signaling cascade (GO:0033173)	12	1	0.09	+	11.52	0.0894	0.808
establishment of endothelial intestinal barrier (GO:0090557)	12	1	0.09	+	11.52	0.0894	0.808
negative regulation of interleukin-1 beta production (GO:0032691)	24	2	0.17	+	11.52	0.0149	0.332
cellular response to iron ion (GO:0071281)	12	1	0.09	+	11.52	0.0894	0.808
pyrimidine nucleoside metabolic process (GO:0006213)	12	1	0.09	+	11.52	0.0894	0.807
ether biosynthetic process (GO:1901503)	12	1	0.09	+	11.52	0.0894	0.807
regulation of platelet aggregation (GO:0090330)	24	2	0.17	+	11.52	0.0149	0.332
cGMP biosynthetic process (GO:0006182)	12	1	0.09	+	11.52	0.0894	0.806
negative regulation of triglyceride metabolic process (GO:0090209)	12	1	0.09	+	11.52	0.0894	0.806
smooth muscle tissue development (GO:0048745)	24	2	0.17	+	11.52	0.0149	0.331
type B pancreatic cell proliferation (GO:0044342)	12	1	0.09	+	11.52	0.0894	0.805
dorsal/ventral axis specification (GO:0009950)	12	1	0.09	+	11.52	0.0894	0.805
axon extension (GO:0048675)	36	3	0.26	+	11.52	0.00275	0.125
cell death in response to oxidative stress (GO:0036473)	24	2	0.17	+	11.52	0.0149	0.331
sarcoplasmic reticulum calcium ion transport (GO:0070296)	12	1	0.09	+	11.52	0.0894	0.804
sodium ion export across plasma membrane (GO:0036376)	12	1	0.09	+	11.52	0.0894	0.804
mRNA transcription by RNA polymerase II (GO:0042789)	12	1	0.09	+	11.52	0.0894	0.803
atrial cardiac muscle cell to AV node cell communication (GO:0086066)	12	1	0.09	+	11.52	0.0894	0.803
membrane depolarization during cardiac muscle cell action potential (GO:0086012)	12	1	0.09	+	11.52	0.0894	0.802
regulation of plasminogen activation (GO:0010755)	12	1	0.09	+	11.52	0.0894	0.802
poly-N-acetyllactosamine biosynthetic process (GO:0030311)	12	1	0.09	+	11.52	0.0894	0.802
poly-N-acetyllactosamine metabolic process (GO:0030309)	12	1	0.09	+	11.52	0.0894	0.801
cellular lipid biosynthetic process (GO:0097384)	12	1	0.09	+	11.52	0.0894	0.801
hyaluronan metabolic process (GO:0030212)	24	2	0.17	+	11.52	0.0149	0.331
metanephros morphogenesis (GO:0003338)	24	2	0.17	+	11.52	0.0149	0.33
response to stimulus involved in regulation of muscle adaptation (GO:0014874)	12	1	0.09	+	11.52	0.0894	0.8
protein localization to ciliary membrane (GO:1903441)	12	1	0.09	+	11.52	0.0894	0.8
high-density lipoprotein particle remodeling (GO:0034375)	12	1	0.09	+	11.52	0.0894	0.799
regulation of tau-protein kinase activity (GO:1902947)	12	1	0.09	+	11.52	0.0894	0.799
adherens junction assembly (GO:0034333)	12	1	0.09	+	11.52	0.0894	0.798
motor neuron axon guidance (GO:0008045)	36	3	0.26	+	11.52	0.00275	0.124
cell differentiation involved in kidney development (GO:0061005)	36	3	0.26	+	11.52	0.00275	0.124
cell fate specification involved in pattern specification (GO:0060573)	12	1	0.09	+	11.52	0.0894	0.798
T-helper 17 type immune response (GO:0072538)	12	1	0.09	+	11.52	0.0894	0.798
prostate glandular acinus development (GO:0060525)	12	1	0.09	+	11.52	0.0894	0.797
glomerulus development (GO:0032835)	49	4	0.35	+	11.29	0.00057	0.042
T cell differentiation involved in immune response (GO:0002292)	37	3	0.27	+	11.21	0.00295	0.13
receptor signaling pathway via STAT (GO:0097696)	37	3	0.27	+	11.21	0.00295	0.13
negative regulation of hydrogen peroxide-induced cell death (GO:1903206)	25	2	0.18	+	11.06	0.016	0.35
positive regulation of glial cell differentiation (GO:0045687)	50	4	0.36	+	11.06	0.000612	0.0443
negative regulation of viral transcription (GO:0032897)	25	2	0.18	+	11.06	0.016	0.349
regulation of branching involved in ureteric bud morphogenesis (GO:0090189)	25	2	0.18	+	11.06	0.016	0.349
negative regulation of response to reactive oxygen species (GO:1901032)	25	2	0.18	+	11.06	0.016	0.348
epithelial cell differentiation involved in kidney development (GO:0035850)	25	2	0.18	+	11.06	0.016	0.348
negative regulation of receptor signaling pathway via JAK-STAT (GO:0046426)	25	2	0.18	+	11.06	0.016	0.347
neuron death (GO:0070997)	63	5	0.46	+	10.98	0.00013	0.0134
cell-substrate junction assembly (GO:0007044)	38	3	0.27	+	10.92	0.00317	0.136
L-alpha-amino acid transmembrane transport (GO:1902475)	39	3	0.28	+	10.64	0.00339	0.143
signal transduction in absence of ligand (GO:0038034)	39	3	0.28	+	10.64	0.00339	0.142
cell-substrate junction organization (GO:0150115)	39	3	0.28	+	10.64	0.00339	0.142
extrinsic apoptotic signaling pathway in absence of ligand (GO:0097192)	39	3	0.28	+	10.64	0.00339	0.141
thalamus development (GO:0021794)	13	1	0.09	+	10.64	0.096	0.843
renal water homeostasis (GO:0003091)	13	1	0.09	+	10.64	0.096	0.843
branching involved in prostate gland morphogenesis (GO:0060442)	13	1	0.09	+	10.64	0.096	0.843
regulation of T-helper 2 cell differentiation (GO:0045628)	13	1	0.09	+	10.64	0.096	0.842
cranial nerve structural organization (GO:0021604)	13	1	0.09	+	10.64	0.096	0.842
insemination (GO:0007320)	13	1	0.09	+	10.64	0.096	0.841
complement receptor mediated signaling pathway (GO:0002430)	13	1	0.09	+	10.64	0.096	0.841
negative regulation of neuron migration (GO:2001223)	13	1	0.09	+	10.64	0.096	0.84
pons development (GO:0021548)	13	1	0.09	+	10.64	0.096	0.84
spinal cord motor neuron cell fate specification (GO:0021520)	13	1	0.09	+	10.64	0.096	0.839
positive regulation of nuclear-transcribed mRNA poly(A) tail shortening (GO:0060213)	13	1	0.09	+	10.64	0.096	0.839
positive regulation of ATP biosynthetic process (GO:2001171)	13	1	0.09	+	10.64	0.096	0.838
lymphoid progenitor cell differentiation (GO:0002320)	13	1	0.09	+	10.64	0.096	0.838
T-helper cell lineage commitment (GO:0002295)	13	1	0.09	+	10.64	0.096	0.837
commissural neuron axon guidance (GO:0071679)	13	1	0.09	+	10.64	0.096	0.837
negative regulation of mesenchymal cell apoptotic process (GO:2001054)	13	1	0.09	+	10.64	0.096	0.836
cytoplasm organization (GO:0007028)	13	1	0.09	+	10.64	0.096	0.836
regulation of cellular amino acid metabolic process (GO:0006521)	13	1	0.09	+	10.64	0.096	0.836
neuronal ion channel clustering (GO:0045161)	13	1	0.09	+	10.64	0.096	0.835
cellular response to reactive nitrogen species (GO:1902170)	13	1	0.09	+	10.64	0.096	0.835
cellular response to lithium ion (GO:0071285)	13	1	0.09	+	10.64	0.096	0.834
planar cell polarity pathway involved in neural tube closure (GO:0090179)	13	1	0.09	+	10.64	0.096	0.834
negative regulation of adenylate cyclase-activating G protein-coupled receptor signaling pathway (GO:0106072)	13	1	0.09	+	10.64	0.096	0.833
regulation of extracellular matrix assembly (GO:1901201)	13	1	0.09	+	10.64	0.096	0.833
reverse cholesterol transport (GO:0043691)	13	1	0.09	+	10.64	0.096	0.832
regulation of secondary metabolic process (GO:0043455)	13	1	0.09	+	10.64	0.096	0.832
carnitine metabolic process (GO:0009437)	13	1	0.09	+	10.64	0.096	0.831
toxin metabolic process (GO:0009404)	13	1	0.09	+	10.64	0.096	0.831
regulation of secondary metabolite biosynthetic process (GO:1900376)	13	1	0.09	+	10.64	0.096	0.831
ceramide transport (GO:0035627)	13	1	0.09	+	10.64	0.096	0.83
auditory behavior (GO:0031223)	13	1	0.09	+	10.64	0.096	0.83
regulation of developmental pigmentation (GO:0048070)	13	1	0.09	+	10.64	0.096	0.829
regulation of melanin biosynthetic process (GO:0048021)	13	1	0.09	+	10.64	0.096	0.829
vitamin biosynthetic process (GO:0009110)	13	1	0.09	+	10.64	0.096	0.828
negative regulation of substrate adhesion-dependent cell spreading (GO:1900025)	13	1	0.09	+	10.64	0.096	0.828
cellular response to forskolin (GO:1904322)	13	1	0.09	+	10.64	0.096	0.827
response to forskolin (GO:1904321)	13	1	0.09	+	10.64	0.096	0.827
bone trabecula morphogenesis (GO:0061430)	13	1	0.09	+	10.64	0.096	0.826
endocrine hormone secretion (GO:0060986)	13	1	0.09	+	10.64	0.096	0.826
renal filtration (GO:0097205)	13	1	0.09	+	10.64	0.096	0.826
negative regulation of transcription from RNA polymerase II promoter in response to stress (GO:0097201)	13	1	0.09	+	10.64	0.096	0.825
lung secretory cell differentiation (GO:0061140)	13	1	0.09	+	10.64	0.096	0.825
branching involved in labyrinthine layer morphogenesis (GO:0060670)	13	1	0.09	+	10.64	0.096	0.824
negative regulation of fatty acid oxidation (GO:0046322)	13	1	0.09	+	10.64	0.096	0.824
negative regulation of cell growth involved in cardiac muscle cell development (GO:0061052)	13	1	0.09	+	10.64	0.096	0.823
alpha-beta T cell differentiation (GO:0046632)	66	5	0.48	+	10.48	0.000159	0.0159
negative regulation of oxidative stress-induced cell death (GO:1903202)	53	4	0.38	+	10.44	0.000752	0.0511
regulation of response to reactive oxygen species (GO:1901031)	40	3	0.29	+	10.37	0.00363	0.15
regulation of membrane permeability (GO:0090559)	67	5	0.48	+	10.32	0.00017	0.0166
T cell lineage commitment (GO:0002360)	27	2	0.2	+	10.24	0.0183	0.389
detection of temperature stimulus (GO:0016048)	27	2	0.2	+	10.24	0.0183	0.388
endochondral bone growth (GO:0003416)	27	2	0.2	+	10.24	0.0183	0.388
cellular response to epidermal growth factor stimulus (GO:0071364)	41	3	0.3	+	10.12	0.00388	0.156
platelet-derived growth factor receptor signaling pathway (GO:0048008)	41	3	0.3	+	10.12	0.00388	0.155
amino acid import (GO:0043090)	41	3	0.3	+	10.12	0.00388	0.155
regulation of cardiac muscle cell apoptotic process (GO:0010665)	55	4	0.4	+	10.06	0.000856	0.0559
response to lithium ion (GO:0010226)	14	1	0.1	+	9.88	0.102	0.866
response to UV-C (GO:0010225)	14	1	0.1	+	9.88	0.102	0.865
regulation of osteoblast proliferation (GO:0033688)	28	2	0.2	+	9.88	0.0195	0.409
negative regulation of erythrocyte differentiation (GO:0045647)	14	1	0.1	+	9.88	0.102	0.865
mononuclear cell differentiation (GO:1903131)	14	1	0.1	+	9.88	0.102	0.864
cell differentiation involved in metanephros development (GO:0072202)	14	1	0.1	+	9.88	0.102	0.864
glycosylceramide metabolic process (GO:0006677)	14	1	0.1	+	9.88	0.102	0.863
inhibitory postsynaptic potential (GO:0060080)	14	1	0.1	+	9.88	0.102	0.863
telomere maintenance via telomerase (GO:0007004)	14	1	0.1	+	9.88	0.102	0.863
radial glial cell differentiation (GO:0060019)	14	1	0.1	+	9.88	0.102	0.862
otic vesicle development (GO:0071599)	14	1	0.1	+	9.88	0.102	0.862
negative regulation of receptor internalization (GO:0002091)	14	1	0.1	+	9.88	0.102	0.861
regulation of neuron maturation (GO:0014041)	14	1	0.1	+	9.88	0.102	0.861
protein neddylation (GO:0045116)	14	1	0.1	+	9.88	0.102	0.86
cellular response to cholesterol (GO:0071397)	14	1	0.1	+	9.88	0.102	0.86
cellular response to gonadotropin stimulus (GO:0071371)	14	1	0.1	+	9.88	0.102	0.859
negative regulation of cell division (GO:0051782)	14	1	0.1	+	9.88	0.102	0.859
negative thymic T cell selection (GO:0045060)	14	1	0.1	+	9.88	0.102	0.858
regulation of T cell differentiation in thymus (GO:0033081)	28	2	0.2	+	9.88	0.0195	0.408
RNA-dependent DNA biosynthetic process (GO:0006278)	14	1	0.1	+	9.88	0.102	0.858
pyrimidine nucleobase metabolic process (GO:0006206)	14	1	0.1	+	9.88	0.102	0.858
trans-synaptic signaling, modulating synaptic transmission (GO:0099550)	14	1	0.1	+	9.88	0.102	0.857
positive regulation of non-canonical Wnt signaling pathway (GO:2000052)	14	1	0.1	+	9.88	0.102	0.857
alanine transport (GO:0032328)	14	1	0.1	+	9.88	0.102	0.856
positive regulation of collateral sprouting (GO:0048672)	14	1	0.1	+	9.88	0.102	0.856
regulation of timing of cell differentiation (GO:0048505)	14	1	0.1	+	9.88	0.102	0.855
negative regulation of JUN kinase activity (GO:0043508)	14	1	0.1	+	9.88	0.102	0.855
nuclear-transcribed mRNA poly(A) tail shortening (GO:0000289)	14	1	0.1	+	9.88	0.102	0.854
CD4-positive, alpha-beta T cell differentiation (GO:0043367)	42	3	0.3	+	9.88	0.00413	0.163
oligosaccharide biosynthetic process (GO:0009312)	14	1	0.1	+	9.88	0.102	0.854
focal adhesion assembly (GO:0048041)	28	2	0.2	+	9.88	0.0195	0.408
fibrinolysis (GO:0042730)	14	1	0.1	+	9.88	0.102	0.853
regulation of vascular associated smooth muscle cell differentiation (GO:1905063)	14	1	0.1	+	9.88	0.102	0.853
coenzyme A metabolic process (GO:0015936)	14	1	0.1	+	9.88	0.102	0.853
terpenoid biosynthetic process (GO:0016114)	14	1	0.1	+	9.88	0.102	0.852
negative regulation of tumor necrosis factor-mediated signaling pathway (GO:0010804)	14	1	0.1	+	9.88	0.102	0.852
protein localization to non-motile cilium (GO:0097499)	14	1	0.1	+	9.88	0.102	0.851
negative regulation of cell morphogenesis involved in differentiation (GO:0010771)	14	1	0.1	+	9.88	0.102	0.851
negative regulation of ossification (GO:0030279)	42	3	0.3	+	9.88	0.00413	0.163
monocyte differentiation (GO:0030224)	14	1	0.1	+	9.88	0.102	0.85
hepatocyte apoptotic process (GO:0097284)	14	1	0.1	+	9.88	0.102	0.85
prostate gland growth (GO:0060736)	14	1	0.1	+	9.88	0.102	0.849
negative regulation of type 2 immune response (GO:0002829)	14	1	0.1	+	9.88	0.102	0.849
regulation of cell maturation (GO:1903429)	28	2	0.2	+	9.88	0.0195	0.407
regulation of cerebellar granule cell precursor proliferation (GO:0021936)	14	1	0.1	+	9.88	0.102	0.849
heart valve formation (GO:0003188)	14	1	0.1	+	9.88	0.102	0.848
nitric oxide metabolic process (GO:0046209)	14	1	0.1	+	9.88	0.102	0.848
negative regulation of lymphocyte differentiation (GO:0045620)	57	4	0.41	+	9.7	0.000971	0.0618
postsynaptic signal transduction (GO:0098926)	43	3	0.31	+	9.65	0.0044	0.169
negative chemotaxis (GO:0050919)	43	3	0.31	+	9.65	0.0044	0.169
acetyl-CoA metabolic process (GO:0006084)	29	2	0.21	+	9.54	0.0208	0.426
regulation of striated muscle cell apoptotic process (GO:0010662)	58	4	0.42	+	9.54	0.00103	0.0652
negative regulation of muscle cell apoptotic process (GO:0010656)	58	4	0.42	+	9.54	0.00103	0.0649
epithelial cell apoptotic process (GO:1904019)	29	2	0.21	+	9.54	0.0208	0.425
prostate gland epithelium morphogenesis (GO:0060740)	29	2	0.21	+	9.54	0.0208	0.425
lung epithelium development (GO:0060428)	44	3	0.32	+	9.43	0.00467	0.173
response to epidermal growth factor (GO:0070849)	44	3	0.32	+	9.43	0.00467	0.173
glial cell fate commitment (GO:0021781)	15	1	0.11	+	9.22	0.109	0.888
tolerance induction (GO:0002507)	15	1	0.11	+	9.22	0.109	0.887
regulation of axon guidance (GO:1902667)	15	1	0.11	+	9.22	0.109	0.887
negative regulation of anoikis (GO:2000811)	15	1	0.11	+	9.22	0.109	0.886
metanephric nephron development (GO:0072210)	30	2	0.22	+	9.22	0.0221	0.414
hematopoietic stem cell differentiation (GO:0060218)	15	1	0.11	+	9.22	0.109	0.886
regulation of nuclear-transcribed mRNA poly(A) tail shortening (GO:0060211)	15	1	0.11	+	9.22	0.109	0.885
positive regulation of gene silencing by miRNA (GO:2000637)	30	2	0.22	+	9.22	0.0221	0.413
prepulse inhibition (GO:0060134)	15	1	0.11	+	9.22	0.109	0.885
regulation of protein glycosylation (GO:0060049)	15	1	0.11	+	9.22	0.109	0.884
convergent extension (GO:0060026)	15	1	0.11	+	9.22	0.109	0.884
melanin metabolic process (GO:0006582)	15	1	0.11	+	9.22	0.109	0.883
amino-acid betaine metabolic process (GO:0006577)	15	1	0.11	+	9.22	0.109	0.883
3'-UTR-mediated mRNA stabilization (GO:0070935)	15	1	0.11	+	9.22	0.109	0.882
positive regulation of killing of cells of other organism (GO:0051712)	15	1	0.11	+	9.22	0.109	0.882
regulation of Wnt signaling pathway, planar cell polarity pathway (GO:2000095)	15	1	0.11	+	9.22	0.109	0.882
positive regulation of voltage-gated calcium channel activity (GO:1901387)	15	1	0.11	+	9.22	0.109	0.881
regulation of establishment of planar polarity involved in neural tube closure (GO:0090178)	15	1	0.11	+	9.22	0.109	0.881
sensory perception of temperature stimulus (GO:0050951)	30	2	0.22	+	9.22	0.0221	0.413
secretory granule localization (GO:0032252)	15	1	0.11	+	9.22	0.109	0.88
spleen development (GO:0048536)	45	3	0.33	+	9.22	0.00496	0.181
negative T cell selection (GO:0043383)	15	1	0.11	+	9.22	0.109	0.88
calcineurin-mediated signaling (GO:0097720)	15	1	0.11	+	9.22	0.109	0.879
positive regulation of nuclear-transcribed mRNA catabolic process, deadenylation-dependent decay (GO:1900153)	15	1	0.11	+	9.22	0.109	0.879
phospholipid homeostasis (GO:0055091)	15	1	0.11	+	9.22	0.109	0.878
negative regulation of protein processing (GO:0010955)	30	2	0.22	+	9.22	0.0221	0.412
regulation of cellular response to hypoxia (GO:1900037)	15	1	0.11	+	9.22	0.109	0.878
positive regulation of glucose metabolic process (GO:0010907)	45	3	0.33	+	9.22	0.00496	0.181
regulation of cholesterol efflux (GO:0010874)	30	2	0.22	+	9.22	0.0221	0.412
regulation of complement activation (GO:0030449)	15	1	0.11	+	9.22	0.109	0.878
negative regulation of production of miRNAs involved in gene silencing by miRNA (GO:1903799)	15	1	0.11	+	9.22	0.109	0.877
response to gonadotropin (GO:0034698)	15	1	0.11	+	9.22	0.109	0.877
lipid glycosylation (GO:0030259)	15	1	0.11	+	9.22	0.109	0.876
positive regulation of cellular carbohydrate metabolic process (GO:0010676)	60	4	0.43	+	9.22	0.00116	0.0687
negative regulation of blood coagulation (GO:0030195)	45	3	0.33	+	9.22	0.00496	0.18
lipoprotein catabolic process (GO:0042159)	15	1	0.11	+	9.22	0.109	0.876
negative regulation of calcium ion transport into cytosol (GO:0010523)	15	1	0.11	+	9.22	0.109	0.875
one-carbon compound transport (GO:0019755)	15	1	0.11	+	9.22	0.109	0.875
positive regulation of inositol phosphate biosynthetic process (GO:0060732)	15	1	0.11	+	9.22	0.109	0.874
hindbrain radial glia guided cell migration (GO:0021932)	15	1	0.11	+	9.22	0.109	0.874
rhythmic behavior (GO:0007622)	30	2	0.22	+	9.22	0.0221	0.411
olfactory bulb interneuron differentiation (GO:0021889)	15	1	0.11	+	9.22	0.109	0.874
negative regulation of protein maturation (GO:1903318)	30	2	0.22	+	9.22	0.0221	0.411
intestinal epithelial cell development (GO:0060576)	15	1	0.11	+	9.22	0.109	0.873
prostate gland morphogenesis (GO:0060512)	30	2	0.22	+	9.22	0.0221	0.41
branching involved in ureteric bud morphogenesis (GO:0001658)	46	3	0.33	+	9.02	0.00525	0.188
regulation of transcription from RNA polymerase II promoter in response to stress (GO:0043618)	46	3	0.33	+	9.02	0.00525	0.187
negative regulation of hemostasis (GO:1900047)	46	3	0.33	+	9.02	0.00525	0.187
positive regulation of posttranscriptional gene silencing (GO:0060148)	31	2	0.22	+	8.92	0.0234	0.427
positive regulation of cholesterol transport (GO:0032376)	31	2	0.22	+	8.92	0.0234	0.427
positive regulation of sterol transport (GO:0032373)	31	2	0.22	+	8.92	0.0234	0.426
bone growth (GO:0098868)	31	2	0.22	+	8.92	0.0234	0.426
chaperone cofactor-dependent protein refolding (GO:0051085)	31	2	0.22	+	8.92	0.0234	0.425
semi-lunar valve development (GO:1905314)	31	2	0.22	+	8.92	0.0234	0.425
axis elongation (GO:0003401)	31	2	0.22	+	8.92	0.0234	0.424
regulation of oxidative stress-induced cell death (GO:1903201)	78	5	0.56	+	8.86	0.000331	0.0265
positive regulation of nitric oxide biosynthetic process (GO:0045429)	47	3	0.34	+	8.83	0.00556	0.193
negative regulation of coagulation (GO:0050819)	47	3	0.34	+	8.83	0.00556	0.192
response to UV-B (GO:0010224)	16	1	0.12	+	8.64	0.115	0.915
cerebellar granular layer development (GO:0021681)	16	1	0.12	+	8.64	0.115	0.915
positive regulation of SMAD protein signal transduction (GO:0060391)	16	1	0.12	+	8.64	0.115	0.914
G protein-coupled glutamate receptor signaling pathway (GO:0007216)	16	1	0.12	+	8.64	0.115	0.914
response to nitric oxide (GO:0071731)	16	1	0.12	+	8.64	0.115	0.913
negative regulation of amyloid-beta formation (GO:1902430)	16	1	0.12	+	8.64	0.115	0.913
regulation of mesenchymal cell apoptotic process (GO:2001053)	16	1	0.12	+	8.64	0.115	0.912
cellular response to fluid shear stress (GO:0071498)	16	1	0.12	+	8.64	0.115	0.912
negative regulation of phosphatidylinositol 3-kinase signaling (GO:0014067)	16	1	0.12	+	8.64	0.115	0.911
epithelial cell maturation (GO:0002070)	16	1	0.12	+	8.64	0.115	0.911
negative regulation of interleukin-1 production (GO:0032692)	32	2	0.23	+	8.64	0.0247	0.446
cellular response to estrogen stimulus (GO:0071391)	16	1	0.12	+	8.64	0.115	0.911
regulation of killing of cells of other organism (GO:0051709)	16	1	0.12	+	8.64	0.115	0.91
regulation of gonad development (GO:1905939)	16	1	0.12	+	8.64	0.115	0.91
regulation of development, heterochronic (GO:0040034)	16	1	0.12	+	8.64	0.115	0.909
intracellular cholesterol transport (GO:0032367)	16	1	0.12	+	8.64	0.115	0.909
lactate metabolic process (GO:0006089)	16	1	0.12	+	8.64	0.115	0.908
dendrite self-avoidance (GO:0070593)	16	1	0.12	+	8.64	0.115	0.908
epithelial cell-cell adhesion (GO:0090136)	16	1	0.12	+	8.64	0.115	0.907
regulation of adenylate cyclase-activating G protein-coupled receptor signaling pathway (GO:0106070)	16	1	0.12	+	8.64	0.115	0.907
regulation of inclusion body assembly (GO:0090083)	16	1	0.12	+	8.64	0.115	0.906
positive regulation of vascular endothelial cell proliferation (GO:1905564)	16	1	0.12	+	8.64	0.115	0.906
regulation of postsynaptic neurotransmitter receptor internalization (GO:0099149)	16	1	0.12	+	8.64	0.115	0.906
negative regulation of smooth muscle cell differentiation (GO:0051151)	16	1	0.12	+	8.64	0.115	0.905
blood vessel endothelial cell migration (GO:0043534)	32	2	0.23	+	8.64	0.0247	0.445
renal absorption (GO:0070293)	16	1	0.12	+	8.64	0.115	0.905
regulation of retinoic acid receptor signaling pathway (GO:0048385)	16	1	0.12	+	8.64	0.115	0.904
positive regulation of membrane protein ectodomain proteolysis (GO:0051044)	16	1	0.12	+	8.64	0.115	0.904
CD4-positive, alpha-beta T cell lineage commitment (GO:0043373)	16	1	0.12	+	8.64	0.115	0.903
erythrocyte maturation (GO:0043249)	16	1	0.12	+	8.64	0.115	0.903
extrinsic apoptotic signaling pathway via death domain receptors (GO:0008625)	32	2	0.23	+	8.64	0.0247	0.445
regulation of triglyceride catabolic process (GO:0010896)	16	1	0.12	+	8.64	0.115	0.902
gas transport (GO:0015669)	16	1	0.12	+	8.64	0.115	0.902
male sex determination (GO:0030238)	16	1	0.12	+	8.64	0.115	0.902
negative regulation of cardiac muscle hypertrophy (GO:0010614)	32	2	0.23	+	8.64	0.0247	0.444
negative regulation of androgen receptor signaling pathway (GO:0060766)	16	1	0.12	+	8.64	0.115	0.901
spongiotrophoblast layer development (GO:0060712)	16	1	0.12	+	8.64	0.115	0.901
negative regulation of cell fate commitment (GO:0010454)	16	1	0.12	+	8.64	0.115	0.9
telencephalon regionalization (GO:0021978)	16	1	0.12	+	8.64	0.115	0.9
mechanosensory behavior (GO:0007638)	16	1	0.12	+	8.64	0.115	0.899
negative regulation of glycolytic process (GO:0045820)	16	1	0.12	+	8.64	0.115	0.899
cell fate commitment involved in pattern specification (GO:0060581)	16	1	0.12	+	8.64	0.115	0.898
ventral spinal cord interneuron fate commitment (GO:0060579)	16	1	0.12	+	8.64	0.115	0.898
negative regulation of T cell differentiation (GO:0045581)	48	3	0.35	+	8.64	0.00588	0.199
nephron epithelium development (GO:0072009)	96	6	0.69	+	8.64	9.5e-05	0.0106
positive regulation of nitric oxide metabolic process (GO:1904407)	48	3	0.35	+	8.64	0.00588	0.199
positive regulation of carbohydrate metabolic process (GO:0045913)	81	5	0.59	+	8.54	0.00039	0.0308
CD4-positive, alpha-beta T cell activation (GO:0035710)	49	3	0.35	+	8.47	0.0062	0.207
kidney epithelium development (GO:0072073)	131	8	0.95	+	8.45	7.51e-06	0.00152
alpha-beta T cell activation (GO:0046631)	82	5	0.59	+	8.43	0.000412	0.032
acute-phase response (GO:0006953)	33	2	0.24	+	8.38	0.0261	0.463
myoblast differentiation (GO:0045445)	33	2	0.24	+	8.38	0.0261	0.463
activation of MAPKK activity (GO:0000186)	33	2	0.24	+	8.38	0.0261	0.462
mitochondrial membrane organization (GO:0007006)	100	6	0.72	+	8.3	0.000118	0.0125
negative regulation of interleukin-6 production (GO:0032715)	50	3	0.36	+	8.3	0.00654	0.212
positive regulation of cell size (GO:0045793)	17	1	0.12	+	8.13	0.122	0.936
positive regulation of glycogen biosynthetic process (GO:0045725)	17	1	0.12	+	8.13	0.122	0.936
type I interferon signaling pathway (GO:0060337)	17	1	0.12	+	8.13	0.122	0.935
water transport (GO:0006833)	17	1	0.12	+	8.13	0.122	0.935
negative regulation of glial cell proliferation (GO:0060253)	17	1	0.12	+	8.13	0.122	0.935
negative regulation of collagen biosynthetic process (GO:0032966)	17	1	0.12	+	8.13	0.122	0.934
regulation of MHC class II biosynthetic process (GO:0045346)	17	1	0.12	+	8.13	0.122	0.934
nephron tubule morphogenesis (GO:0072078)	68	4	0.49	+	8.13	0.0018	0.0944
negative regulation of gliogenesis (GO:0014014)	51	3	0.37	+	8.13	0.00689	0.22
V(D)J recombination (GO:0033151)	17	1	0.12	+	8.13	0.122	0.933
interleukin-1 beta production (GO:0032611)	17	1	0.12	+	8.13	0.122	0.933
cellular response to type I interferon (GO:0071357)	17	1	0.12	+	8.13	0.122	0.932
T cell selection (GO:0045058)	51	3	0.37	+	8.13	0.00689	0.22
regulation of myeloid cell apoptotic process (GO:0033032)	34	2	0.25	+	8.13	0.0275	0.481
positive regulation of phosphoprotein phosphatase activity (GO:0032516)	17	1	0.12	+	8.13	0.122	0.932
neurotransmitter receptor internalization (GO:0099590)	17	1	0.12	+	8.13	0.122	0.931
negative regulation of neurotransmitter transport (GO:0051589)	17	1	0.12	+	8.13	0.122	0.931
regulation of neurotransmitter uptake (GO:0051580)	17	1	0.12	+	8.13	0.122	0.93
intracellular sterol transport (GO:0032366)	17	1	0.12	+	8.13	0.122	0.93
cellular response to leptin stimulus (GO:0044320)	17	1	0.12	+	8.13	0.122	0.93
regulation of DNA-templated transcription in response to stress (GO:0043620)	51	3	0.37	+	8.13	0.00689	0.219
protein insertion into mitochondrial membrane (GO:0051204)	17	1	0.12	+	8.13	0.122	0.929
chaperone-mediated protein complex assembly (GO:0051131)	17	1	0.12	+	8.13	0.122	0.929
T cell apoptotic process (GO:0070231)	17	1	0.12	+	8.13	0.122	0.928
regulation of lipoprotein lipase activity (GO:0051004)	17	1	0.12	+	8.13	0.122	0.928
regulation of long-term synaptic depression (GO:1900452)	17	1	0.12	+	8.13	0.122	0.927
regulation of nuclear-transcribed mRNA catabolic process, deadenylation-dependent decay (GO:1900151)	17	1	0.12	+	8.13	0.122	0.927
cyclic nucleotide metabolic process (GO:0009187)	34	2	0.25	+	8.13	0.0275	0.481
nucleoside catabolic process (GO:0009164)	17	1	0.12	+	8.13	0.122	0.926
bicarbonate transport (GO:0015701)	17	1	0.12	+	8.13	0.122	0.926
regulation of cGMP-mediated signaling (GO:0010752)	17	1	0.12	+	8.13	0.122	0.926
negative regulation of collagen metabolic process (GO:0010713)	17	1	0.12	+	8.13	0.122	0.925
response to antibiotic (GO:0046677)	34	2	0.25	+	8.13	0.0275	0.48
maintenance of gastrointestinal epithelium (GO:0030277)	17	1	0.12	+	8.13	0.122	0.925
regulation of transcription involved in cell fate commitment (GO:0060850)	17	1	0.12	+	8.13	0.122	0.924
negative regulation of muscle hypertrophy (GO:0014741)	34	2	0.25	+	8.13	0.0275	0.48
regulation of hydrogen peroxide metabolic process (GO:0010310)	17	1	0.12	+	8.13	0.122	0.924
pulmonary valve morphogenesis (GO:0003184)	17	1	0.12	+	8.13	0.122	0.923
negative regulation of pri-miRNA transcription by RNA polymerase II (GO:1902894)	17	1	0.12	+	8.13	0.122	0.923
negative regulation of leukocyte chemotaxis (GO:0002689)	17	1	0.12	+	8.13	0.122	0.922
positive regulation of osteoblast differentiation (GO:0045669)	69	4	0.5	+	8.02	0.0019	0.0965
regulation of oxidative stress-induced neuron death (GO:1903203)	35	2	0.25	+	7.9	0.0289	0.469
regulation of homotypic cell-cell adhesion (GO:0034110)	35	2	0.25	+	7.9	0.0289	0.469
negative regulation of glial cell differentiation (GO:0045686)	35	2	0.25	+	7.9	0.0289	0.468
cartilage development involved in endochondral bone morphogenesis (GO:0060351)	35	2	0.25	+	7.9	0.0289	0.468
nephron epithelium morphogenesis (GO:0072088)	70	4	0.51	+	7.9	0.00199	0.1
chondrocyte differentiation (GO:0002062)	70	4	0.51	+	7.9	0.00199	0.1
negative regulation of leukocyte differentiation (GO:1902106)	105	6	0.76	+	7.9	0.000152	0.0152
regulation of kidney development (GO:0090183)	35	2	0.25	+	7.9	0.0289	0.467
response to axon injury (GO:0048678)	35	2	0.25	+	7.9	0.0289	0.467
positive T cell selection (GO:0043368)	35	2	0.25	+	7.9	0.0289	0.466
developmental induction (GO:0031128)	35	2	0.25	+	7.9	0.0289	0.466
regulation of necrotic cell death (GO:0010939)	35	2	0.25	+	7.9	0.0289	0.465
cell proliferation in forebrain (GO:0021846)	35	2	0.25	+	7.9	0.0289	0.465
regulation of glial cell differentiation (GO:0045685)	88	5	0.64	+	7.86	0.00056	0.0417
regulation of cellular response to oxidative stress (GO:1900407)	88	5	0.64	+	7.86	0.00056	0.0415
negative regulation of cytokine-mediated signaling pathway (GO:0001960)	53	3	0.38	+	7.83	0.00762	0.234
nephron morphogenesis (GO:0072028)	71	4	0.51	+	7.79	0.00209	0.104
regulation of tyrosine phosphorylation of STAT protein (GO:0042509)	71	4	0.51	+	7.79	0.00209	0.104
negative regulation of hemopoiesis (GO:1903707)	107	6	0.77	+	7.75	0.000167	0.0165
preganglionic parasympathetic fiber development (GO:0021783)	18	1	0.13	+	7.68	0.128	0.962
striatum development (GO:0021756)	18	1	0.13	+	7.68	0.128	0.962
regulation of establishment of endothelial barrier (GO:1903140)	18	1	0.13	+	7.68	0.128	0.961
cGMP metabolic process (GO:0046068)	18	1	0.13	+	7.68	0.128	0.961
plasma lipoprotein particle organization (GO:0071827)	36	2	0.26	+	7.68	0.0304	0.483
ventral spinal cord interneuron differentiation (GO:0021514)	18	1	0.13	+	7.68	0.128	0.961
retinal rod cell differentiation (GO:0060221)	18	1	0.13	+	7.68	0.128	0.96
regulation of CD8-positive, alpha-beta T cell activation (GO:2001185)	18	1	0.13	+	7.68	0.128	0.96
negative regulation of lipase activity (GO:0060192)	18	1	0.13	+	7.68	0.128	0.959
de novo' protein folding (GO:0006458)	36	2	0.26	+	7.68	0.0304	0.483
negative regulation of oxidative stress-induced intrinsic apoptotic signaling pathway (GO:1902176)	18	1	0.13	+	7.68	0.128	0.959
regulation of mitotic spindle assembly (GO:1901673)	18	1	0.13	+	7.68	0.128	0.958
regulation of endothelial cell development (GO:1901550)	18	1	0.13	+	7.68	0.128	0.958
response to fatty acid (GO:0070542)	54	3	0.39	+	7.68	0.008	0.244
cellular response to sterol (GO:0036315)	18	1	0.13	+	7.68	0.128	0.957
de novo' posttranslational protein folding (GO:0051084)	36	2	0.26	+	7.68	0.0304	0.482
positive regulation of morphogenesis of an epithelium (GO:1905332)	36	2	0.26	+	7.68	0.0304	0.482
positive regulation of purine nucleotide biosynthetic process (GO:1900373)	18	1	0.13	+	7.68	0.128	0.957
positive regulation of nucleotide biosynthetic process (GO:0030810)	18	1	0.13	+	7.68	0.128	0.956
mRNA transcription (GO:0009299)	18	1	0.13	+	7.68	0.128	0.956
stress fiber assembly (GO:0043149)	18	1	0.13	+	7.68	0.128	0.956
female genitalia development (GO:0030540)	18	1	0.13	+	7.68	0.128	0.955
regulation of inositol phosphate biosynthetic process (GO:0010919)	18	1	0.13	+	7.68	0.128	0.955
positive regulation of triglyceride biosynthetic process (GO:0010867)	18	1	0.13	+	7.68	0.128	0.954
regulation of lamellipodium assembly (GO:0010591)	36	2	0.26	+	7.68	0.0304	0.481
epithelial cilium movement involved in extracellular fluid movement (GO:0003351)	36	2	0.26	+	7.68	0.0304	0.481
contractile actin filament bundle assembly (GO:0030038)	18	1	0.13	+	7.68	0.128	0.954
3'-UTR-mediated mRNA destabilization (GO:0061158)	18	1	0.13	+	7.68	0.128	0.953
copulation (GO:0007620)	18	1	0.13	+	7.68	0.128	0.953
negative regulation of amyloid precursor protein catabolic process (GO:1902992)	18	1	0.13	+	7.68	0.128	0.952
negative regulation of striated muscle tissue development (GO:0045843)	18	1	0.13	+	7.68	0.128	0.952
ureteric bud development (GO:0001657)	91	5	0.66	+	7.6	0.000647	0.046
negative regulation of peptidyl-tyrosine phosphorylation (GO:0050732)	55	3	0.4	+	7.54	0.00839	0.253
L-amino acid transport (GO:0015807)	55	3	0.4	+	7.54	0.00839	0.252
mesonephric tubule development (GO:0072164)	92	5	0.67	+	7.52	0.000678	0.0478
mesonephric epithelium development (GO:0072163)	92	5	0.67	+	7.52	0.000678	0.0476
actin filament-based movement (GO:0030048)	92	5	0.67	+	7.52	0.000678	0.0474
secretory granule organization (GO:0033363)	37	2	0.27	+	7.48	0.0319	0.501
positive regulation of mesenchymal cell proliferation (GO:0002053)	37	2	0.27	+	7.48	0.0319	0.5
proximal/distal pattern formation (GO:0009954)	37	2	0.27	+	7.48	0.0319	0.5
neutral amino acid transport (GO:0015804)	37	2	0.27	+	7.48	0.0319	0.499
regulation of sprouting angiogenesis (GO:1903670)	37	2	0.27	+	7.48	0.0319	0.499
renal tubule morphogenesis (GO:0061333)	74	4	0.54	+	7.48	0.00242	0.112
response to ischemia (GO:0002931)	37	2	0.27	+	7.48	0.0319	0.498
regulation of humoral immune response (GO:0002920)	37	2	0.27	+	7.48	0.0319	0.498
dicarboxylic acid transport (GO:0006835)	56	3	0.4	+	7.41	0.0088	0.26
positive regulation of gliogenesis (GO:0014015)	75	4	0.54	+	7.38	0.00253	0.117
regulation of ossification (GO:0030278)	132	7	0.95	+	7.33	6.65e-05	0.00795
mesonephros development (GO:0001823)	95	5	0.69	+	7.28	0.000779	0.0519
dorsal/ventral pattern formation (GO:0009953)	95	5	0.69	+	7.28	0.000779	0.0516
regulation of tolerance induction (GO:0002643)	19	1	0.14	+	7.28	0.134	0.988
regulation of protein targeting to mitochondrion (GO:1903214)	19	1	0.14	+	7.28	0.134	0.987
ureter development (GO:0072189)	19	1	0.14	+	7.28	0.134	0.987
secretion by tissue (GO:0032941)	19	1	0.14	+	7.28	0.134	0.986
reactive nitrogen species metabolic process (GO:2001057)	19	1	0.14	+	7.28	0.134	0.986
natural killer cell differentiation (GO:0001779)	19	1	0.14	+	7.28	0.134	0.986
nephron tubule formation (GO:0072079)	19	1	0.14	+	7.28	0.134	0.985
regulation of natural killer cell differentiation (GO:0032823)	19	1	0.14	+	7.28	0.134	0.985
Sertoli cell development (GO:0060009)	19	1	0.14	+	7.28	0.134	0.984
glandular epithelial cell development (GO:0002068)	19	1	0.14	+	7.28	0.134	0.984
hematopoietic stem cell proliferation (GO:0071425)	19	1	0.14	+	7.28	0.134	0.983
positive regulation of myoblast fusion (GO:1901741)	19	1	0.14	+	7.28	0.134	0.983
interleukin-1 production (GO:0032612)	19	1	0.14	+	7.28	0.134	0.982
medium-chain fatty acid metabolic process (GO:0051791)	19	1	0.14	+	7.28	0.134	0.982
positive regulation of glycogen metabolic process (GO:0070875)	19	1	0.14	+	7.28	0.134	0.981
regulation of fibroblast apoptotic process (GO:2000269)	19	1	0.14	+	7.28	0.134	0.981
pigment granule organization (GO:0048753)	19	1	0.14	+	7.28	0.134	0.981
negative regulation of release of cytochrome c from mitochondria (GO:0090201)	19	1	0.14	+	7.28	0.134	0.98
negative regulation of astrocyte differentiation (GO:0048712)	19	1	0.14	+	7.28	0.134	0.98
negative regulation of meiotic cell cycle (GO:0051447)	19	1	0.14	+	7.28	0.134	0.979
regulation of voltage-gated calcium channel activity (GO:1901385)	38	2	0.27	+	7.28	0.0334	0.519
positive regulation of purine nucleotide metabolic process (GO:1900544)	38	2	0.27	+	7.28	0.0334	0.519
negative regulation of vascular permeability (GO:0043116)	19	1	0.14	+	7.28	0.134	0.979
T cell homeostasis (GO:0043029)	38	2	0.27	+	7.28	0.0334	0.518
negative regulation of bone mineralization (GO:0030502)	19	1	0.14	+	7.28	0.134	0.978
peptidyl-tyrosine dephosphorylation (GO:0035335)	38	2	0.27	+	7.28	0.0334	0.518
cardiac muscle cell contraction (GO:0086003)	38	2	0.27	+	7.28	0.0334	0.517
regulation of release of sequestered calcium ion into cytosol by sarcoplasmic reticulum (GO:0010880)	19	1	0.14	+	7.28	0.134	0.978
synaptic transmission, glutamatergic (GO:0035249)	38	2	0.27	+	7.28	0.0334	0.517
negative regulation of sodium ion transport (GO:0010766)	19	1	0.14	+	7.28	0.134	0.977
cell growth (GO:0016049)	114	6	0.82	+	7.28	0.000232	0.0208
negative regulation of gene silencing by miRNA (GO:0060965)	19	1	0.14	+	7.28	0.134	0.977
nucleobase-containing small molecule catabolic process (GO:0034656)	19	1	0.14	+	7.28	0.134	0.976
response to cocaine (GO:0042220)	38	2	0.27	+	7.28	0.0334	0.516
regulation of platelet activation (GO:0010543)	38	2	0.27	+	7.28	0.0334	0.516
negative regulation of response to cytokine stimulus (GO:0060761)	57	3	0.41	+	7.28	0.00921	0.267
ether lipid metabolic process (GO:0046485)	19	1	0.14	+	7.28	0.134	0.976
trophoblast giant cell differentiation (GO:0060707)	19	1	0.14	+	7.28	0.134	0.976
lamellipodium assembly (GO:0030032)	38	2	0.27	+	7.28	0.0334	0.515
positive regulation of nucleotide metabolic process (GO:0045981)	38	2	0.27	+	7.28	0.0334	0.515
ureteric bud morphogenesis (GO:0060675)	57	3	0.41	+	7.28	0.00921	0.266
branch elongation of an epithelium (GO:0060602)	19	1	0.14	+	7.28	0.134	0.975
negative regulation of smoothened signaling pathway (GO:0045879)	38	2	0.27	+	7.28	0.0334	0.514
pyrimidine-containing compound catabolic process (GO:0072529)	19	1	0.14	+	7.28	0.134	0.975
amino acid transmembrane transport (GO:0003333)	77	4	0.56	+	7.18	0.00277	0.123
glutathione metabolic process (GO:0006749)	58	3	0.42	+	7.15	0.00964	0.274
mesonephric tubule morphogenesis (GO:0072171)	58	3	0.42	+	7.15	0.00964	0.274
insulin receptor signaling pathway (GO:0008286)	58	3	0.42	+	7.15	0.00964	0.273
regulation of response to oxidative stress (GO:1902882)	97	5	0.7	+	7.13	0.000852	0.0558
extracellular transport (GO:0006858)	39	2	0.28	+	7.09	0.035	0.535
regulation of gliogenesis (GO:0014013)	119	6	0.86	+	6.97	0.000289	0.0239
positive regulation of gluconeogenesis (GO:0045722)	20	1	0.14	+	6.91	0.14	1
negative regulation of T-helper cell differentiation (GO:0045623)	20	1	0.14	+	6.91	0.14	1
hexose catabolic process (GO:0019320)	20	1	0.14	+	6.91	0.14	1
protein-lipid complex subunit organization (GO:0071825)	40	2	0.29	+	6.91	0.0366	0.521
cell migration in hindbrain (GO:0021535)	20	1	0.14	+	6.91	0.14	1
positive regulation of stem cell differentiation (GO:2000738)	20	1	0.14	+	6.91	0.14	1
vocalization behavior (GO:0071625)	20	1	0.14	+	6.91	0.14	1
synaptic transmission, GABAergic (GO:0051932)	20	1	0.14	+	6.91	0.14	1
negative regulation of muscle tissue development (GO:1901862)	20	1	0.14	+	6.91	0.14	1
metanephros development (GO:0001656)	80	4	0.58	+	6.91	0.00316	0.137
regulation of focal adhesion assembly (GO:0051893)	60	3	0.43	+	6.91	0.0105	0.291
interferon-gamma production (GO:0032609)	20	1	0.14	+	6.91	0.14	1
cellular response to glucocorticoid stimulus (GO:0071385)	40	2	0.29	+	6.91	0.0366	0.521
negative regulation of myeloid cell apoptotic process (GO:0033033)	20	1	0.14	+	6.91	0.14	1
response to cholesterol (GO:0070723)	20	1	0.14	+	6.91	0.14	1
regulation of cell proliferation involved in heart morphogenesis (GO:2000136)	20	1	0.14	+	6.91	0.14	1
response to leptin (GO:0044321)	20	1	0.14	+	6.91	0.14	1
detection of temperature stimulus involved in sensory perception of pain (GO:0050965)	20	1	0.14	+	6.91	0.14	1
regulation of cell-substrate junction assembly (GO:0090109)	60	3	0.43	+	6.91	0.0105	0.29
negative regulation of muscle organ development (GO:0048635)	20	1	0.14	+	6.91	0.14	1
response to glucocorticoid (GO:0051384)	80	4	0.58	+	6.91	0.00316	0.136
regulation of vascular endothelial growth factor signaling pathway (GO:1900746)	20	1	0.14	+	6.91	0.14	1
steroid hormone biosynthetic process (GO:0120178)	20	1	0.14	+	6.91	0.14	1
regulation of mitochondrial outer membrane permeabilization involved in apoptotic signaling pathway (GO:1901028)	20	1	0.14	+	6.91	0.14	1
regulation of short-term neuronal synaptic plasticity (GO:0048172)	20	1	0.14	+	6.91	0.14	1
outer dynein arm assembly (GO:0036158)	20	1	0.14	+	6.91	0.14	1
regulation of lipoprotein particle clearance (GO:0010984)	20	1	0.14	+	6.91	0.14	1
negative regulation of bone remodeling (GO:0046851)	20	1	0.14	+	6.91	0.14	1
filopodium assembly (GO:0046847)	20	1	0.14	+	6.91	0.14	1
NAD metabolic process (GO:0019674)	20	1	0.14	+	6.91	0.14	1
plasma lipoprotein particle assembly (GO:0034377)	20	1	0.14	+	6.91	0.14	1
regulation of interleukin-1 beta production (GO:0032651)	81	4	0.59	+	6.83	0.0033	0.139
developmental cell growth (GO:0048588)	102	5	0.74	+	6.78	0.00106	0.0649
nephron tubule development (GO:0072080)	82	4	0.59	+	6.75	0.00344	0.143
homeostasis of number of cells within a tissue (GO:0048873)	41	2	0.3	+	6.75	0.0382	0.536
protein kinase B signaling (GO:0043491)	41	2	0.3	+	6.75	0.0382	0.536
positive regulation of ATP metabolic process (GO:1903580)	41	2	0.3	+	6.75	0.0382	0.535
response to drug (GO:0042493)	247	12	1.79	+	6.72	3.95e-07	0.000111
regulation of extrinsic apoptotic signaling pathway (GO:2001236)	165	8	1.19	+	6.7	3.67e-05	0.00508
positive regulation of reactive oxygen species biosynthetic process (GO:1903428)	62	3	0.45	+	6.69	0.0115	0.308
positive regulation of oxidative stress-induced cell death (GO:1903209)	21	1	0.15	+	6.59	0.147	1
positive regulation of T-helper cell differentiation (GO:0045624)	21	1	0.15	+	6.59	0.147	1
sulfur compound transport (GO:0072348)	42	2	0.3	+	6.59	0.0398	0.553
positive regulation of neuron migration (GO:2001224)	21	1	0.15	+	6.59	0.147	1
sperm axoneme assembly (GO:0007288)	21	1	0.15	+	6.59	0.147	1
activation of phospholipase C activity (GO:0007202)	21	1	0.15	+	6.59	0.147	1
regulation of ATP biosynthetic process (GO:2001169)	21	1	0.15	+	6.59	0.147	1
release of cytochrome c from mitochondria (GO:0001836)	21	1	0.15	+	6.59	0.147	1
negative regulation of posttranscriptional gene silencing (GO:0060149)	21	1	0.15	+	6.59	0.147	1
glycerol ether metabolic process (GO:0006662)	21	1	0.15	+	6.59	0.147	1
regulation of mitochondrial depolarization (GO:0051900)	21	1	0.15	+	6.59	0.147	1
regulation of mitochondrial membrane permeability involved in apoptotic process (GO:1902108)	21	1	0.15	+	6.59	0.147	1
regulation of anoikis (GO:2000209)	21	1	0.15	+	6.59	0.147	1
positive regulation of chondrocyte differentiation (GO:0032332)	21	1	0.15	+	6.59	0.147	1
establishment of protein localization to mitochondrial membrane (GO:0090151)	21	1	0.15	+	6.59	0.147	1
positive regulation of cell migration involved in sprouting angiogenesis (GO:0090050)	21	1	0.15	+	6.59	0.147	1
anatomical structure arrangement (GO:0048532)	21	1	0.15	+	6.59	0.147	1
macromolecule deacylation (GO:0098732)	63	3	0.46	+	6.59	0.0119	0.317
parasympathetic nervous system development (GO:0048486)	21	1	0.15	+	6.59	0.147	1
necroptotic process (GO:0070266)	21	1	0.15	+	6.59	0.147	1
granulocyte differentiation (GO:0030851)	21	1	0.15	+	6.59	0.147	1
protein deacylation (GO:0035601)	63	3	0.46	+	6.59	0.0119	0.316
inositol phosphate-mediated signaling (GO:0048016)	21	1	0.15	+	6.59	0.147	1
positive regulation of bone mineralization (GO:0030501)	42	2	0.3	+	6.59	0.0398	0.552
telomere maintenance via telomere lengthening (GO:0010833)	21	1	0.15	+	6.59	0.147	1
decidualization (GO:0046697)	21	1	0.15	+	6.59	0.147	1
negative regulation of gene silencing by RNA (GO:0060967)	21	1	0.15	+	6.59	0.147	1
T-helper 1 type immune response (GO:0042088)	21	1	0.15	+	6.59	0.147	1
central nervous system neuron axonogenesis (GO:0021955)	42	2	0.3	+	6.59	0.0398	0.552
positive regulation of glycolytic process (GO:0045821)	21	1	0.15	+	6.59	0.147	1
pulmonary valve development (GO:0003177)	21	1	0.15	+	6.59	0.147	1
negative regulation of necrotic cell death (GO:0060547)	21	1	0.15	+	6.59	0.147	1
nephron development (GO:0072006)	129	6	0.93	+	6.43	0.000437	0.0338
behavioral fear response (GO:0001662)	43	2	0.31	+	6.43	0.0415	0.567
cellular response to retinoic acid (GO:0071300)	43	2	0.31	+	6.43	0.0415	0.566
regulation of myotube differentiation (GO:0010830)	43	2	0.31	+	6.43	0.0415	0.566
regulation of viral transcription (GO:0046782)	43	2	0.31	+	6.43	0.0415	0.565
regulation of cell-substrate junction organization (GO:0150116)	65	3	0.47	+	6.38	0.0129	0.334
regulation of blood coagulation (GO:0030193)	65	3	0.47	+	6.38	0.0129	0.334
response to corticosteroid (GO:0031960)	87	4	0.63	+	6.36	0.00421	0.165
positive regulation of Notch signaling pathway (GO:0045747)	44	2	0.32	+	6.29	0.0431	0.56
cellular response to amino acid starvation (GO:0034198)	44	2	0.32	+	6.29	0.0431	0.56
trachea development (GO:0060438)	22	1	0.16	+	6.29	0.153	1
positive regulation of extracellular matrix organization (GO:1903055)	22	1	0.16	+	6.29	0.153	1
regulation of cellular response to vascular endothelial growth factor stimulus (GO:1902547)	22	1	0.16	+	6.29	0.153	1
glycosphingolipid biosynthetic process (GO:0006688)	22	1	0.16	+	6.29	0.153	1
cholesterol efflux (GO:0033344)	22	1	0.16	+	6.29	0.153	1
regulation of sister chromatid cohesion (GO:0007063)	22	1	0.16	+	6.29	0.153	1
positive regulation of nitric-oxide synthase biosynthetic process (GO:0051770)	22	1	0.16	+	6.29	0.153	1
response to electrical stimulus (GO:0051602)	22	1	0.16	+	6.29	0.153	1
neural nucleus development (GO:0048857)	22	1	0.16	+	6.29	0.153	1
purine nucleobase metabolic process (GO:0006144)	22	1	0.16	+	6.29	0.153	1
positive regulation of skeletal muscle tissue development (GO:0048643)	22	1	0.16	+	6.29	0.153	1
positive regulation of myelination (GO:0031643)	22	1	0.16	+	6.29	0.153	1
negative regulation of purine nucleotide metabolic process (GO:1900543)	22	1	0.16	+	6.29	0.153	1
regulation of hemostasis (GO:1900046)	66	3	0.48	+	6.29	0.0135	0.345
regulation of glial cell migration (GO:1903975)	22	1	0.16	+	6.29	0.153	1
cell-cell signaling involved in cardiac conduction (GO:0086019)	22	1	0.16	+	6.29	0.153	1
establishment of apical/basal cell polarity (GO:0035089)	22	1	0.16	+	6.29	0.153	1
renal tubule development (GO:0061326)	88	4	0.64	+	6.29	0.00438	0.169
negative regulation of viral entry into host cell (GO:0046597)	22	1	0.16	+	6.29	0.153	1
negative regulation of smooth muscle cell migration (GO:0014912)	22	1	0.16	+	6.29	0.153	1
estrogen metabolic process (GO:0008210)	22	1	0.16	+	6.29	0.153	1
regulation of morphogenesis of a branching structure (GO:0060688)	66	3	0.48	+	6.29	0.0135	0.344
retrograde axonal transport (GO:0008090)	22	1	0.16	+	6.29	0.153	1
intestinal epithelial cell differentiation (GO:0060575)	22	1	0.16	+	6.29	0.153	1
kidney morphogenesis (GO:0060993)	89	4	0.64	+	6.22	0.00455	0.17
positive regulation of apoptotic signaling pathway (GO:2001235)	156	7	1.13	+	6.21	0.00018	0.0173
acute inflammatory response (GO:0002526)	67	3	0.48	+	6.19	0.014	0.35
regulation of protein processing (GO:0070613)	67	3	0.48	+	6.19	0.014	0.349
regulation of morphogenesis of an epithelium (GO:1905330)	67	3	0.48	+	6.19	0.014	0.349
developmental growth involved in morphogenesis (GO:0060560)	134	6	0.97	+	6.19	0.00053	0.0398
homotypic cell-cell adhesion (GO:0034109)	45	2	0.33	+	6.15	0.0449	0.578
negative regulation of neuron differentiation (GO:0045665)	90	4	0.65	+	6.15	0.00473	0.175
behavioral defense response (GO:0002209)	45	2	0.33	+	6.15	0.0449	0.577
cellular response to corticosteroid stimulus (GO:0071384)	45	2	0.33	+	6.15	0.0449	0.577
regulation of release of cytochrome c from mitochondria (GO:0090199)	45	2	0.33	+	6.15	0.0449	0.577
positive regulation of B cell proliferation (GO:0030890)	45	2	0.33	+	6.15	0.0449	0.576
prostate gland development (GO:0030850)	45	2	0.33	+	6.15	0.0449	0.576
regulation of mesenchymal cell proliferation (GO:0010464)	45	2	0.33	+	6.15	0.0449	0.575
embryo implantation (GO:0007566)	45	2	0.33	+	6.15	0.0449	0.575
regulation of osteoblast differentiation (GO:0045667)	136	6	0.98	+	6.1	0.000571	0.0419
regulation of nitric oxide biosynthetic process (GO:0045428)	68	3	0.49	+	6.1	0.0145	0.327
leukocyte homeostasis (GO:0001776)	91	4	0.66	+	6.08	0.00491	0.18
response to heat (GO:0009408)	91	4	0.66	+	6.08	0.00491	0.18
regulation of lamellipodium organization (GO:1902743)	46	2	0.33	+	6.01	0.0466	0.593
mitochondrial transport (GO:0006839)	184	8	1.33	+	6.01	7.66e-05	0.00889
negative regulation of stem cell differentiation (GO:2000737)	23	1	0.17	+	6.01	0.159	1
positive regulation of superoxide anion generation (GO:0032930)	23	1	0.17	+	6.01	0.159	1
negative regulation of stress-activated MAPK cascade (GO:0032873)	46	2	0.33	+	6.01	0.0466	0.592
cellular response to pH (GO:0071467)	23	1	0.17	+	6.01	0.159	1
regulation of myoblast fusion (GO:1901739)	23	1	0.17	+	6.01	0.159	1
action potential (GO:0001508)	92	4	0.67	+	6.01	0.00509	0.182
positive regulation of mast cell activation involved in immune response (GO:0033008)	23	1	0.17	+	6.01	0.159	1
negative regulation of chondrocyte differentiation (GO:0032331)	23	1	0.17	+	6.01	0.159	1
regulation of vascular endothelial cell proliferation (GO:1905562)	23	1	0.17	+	6.01	0.159	1
negative regulation of stress-activated protein kinase signaling cascade (GO:0070303)	46	2	0.33	+	6.01	0.0466	0.592
lymphocyte apoptotic process (GO:0070227)	23	1	0.17	+	6.01	0.159	1
negative regulation of receptor-mediated endocytosis (GO:0048261)	23	1	0.17	+	6.01	0.159	1
notochord development (GO:0030903)	23	1	0.17	+	6.01	0.159	1
negative regulation of CD4-positive, alpha-beta T cell differentiation (GO:0043371)	23	1	0.17	+	6.01	0.159	1
positive regulation of mast cell degranulation (GO:0043306)	23	1	0.17	+	6.01	0.159	1
male genitalia development (GO:0030539)	23	1	0.17	+	6.01	0.159	1
C4-dicarboxylate transport (GO:0015740)	23	1	0.17	+	6.01	0.159	1
regulation of triglyceride biosynthetic process (GO:0010866)	23	1	0.17	+	6.01	0.159	1
thyroid hormone metabolic process (GO:0042403)	23	1	0.17	+	6.01	0.159	1
melanocyte differentiation (GO:0030318)	23	1	0.17	+	6.01	0.159	1
cGMP-mediated signaling (GO:0019934)	23	1	0.17	+	6.01	0.159	1
negative regulation of nucleotide metabolic process (GO:0045980)	23	1	0.17	+	6.01	0.159	1
reactive oxygen species biosynthetic process (GO:1903409)	23	1	0.17	+	6.01	0.159	1
plasma lipoprotein particle remodeling (GO:0034369)	23	1	0.17	+	6.01	0.159	1
protein-lipid complex remodeling (GO:0034368)	23	1	0.17	+	6.01	0.159	1
response to type I interferon (GO:0034340)	23	1	0.17	+	6.01	0.159	1
vesicle cytoskeletal trafficking (GO:0099518)	69	3	0.5	+	6.01	0.0151	0.334
regulation of coagulation (GO:0050818)	69	3	0.5	+	6.01	0.0151	0.334
coagulation (GO:0050817)	115	5	0.83	+	6.01	0.00176	0.095
neuron projection extension (GO:1990138)	69	3	0.5	+	6.01	0.0151	0.333
negative regulation of wound healing (GO:0061045)	69	3	0.5	+	6.01	0.0151	0.333
blood coagulation (GO:0007596)	115	5	0.83	+	6.01	0.00176	0.0947
axon guidance (GO:0007411)	231	10	1.67	+	5.99	9.99e-06	0.00192
neuron projection guidance (GO:0097485)	232	10	1.68	+	5.96	1.04e-05	0.00195
axis specification (GO:0009798)	93	4	0.67	+	5.95	0.00528	0.187
regulation of protein maturation (GO:1903317)	70	3	0.51	+	5.93	0.0157	0.343
hemostasis (GO:0007599)	117	5	0.85	+	5.91	0.00189	0.0966
negative regulation of cell activation (GO:0050866)	211	9	1.53	+	5.9	3.14e-05	0.00463
axonogenesis (GO:0007409)	352	15	2.55	+	5.89	6.87e-08	2.52e-05
purine nucleoside bisphosphate metabolic process (GO:0034032)	94	4	0.68	+	5.88	0.00548	0.191
negative regulation of axon extension (GO:0030517)	47	2	0.34	+	5.88	0.0484	0.611
lamellipodium organization (GO:0097581)	47	2	0.34	+	5.88	0.0484	0.61
ribonucleoside bisphosphate metabolic process (GO:0033875)	94	4	0.68	+	5.88	0.00548	0.191
nucleoside bisphosphate metabolic process (GO:0033865)	94	4	0.68	+	5.88	0.00548	0.19
heart valve morphogenesis (GO:0003179)	47	2	0.34	+	5.88	0.0484	0.61
oligodendrocyte differentiation (GO:0048709)	71	3	0.51	+	5.84	0.0162	0.352
axon development (GO:0061564)	383	16	2.77	+	5.78	3.2e-08	1.44e-05
amino acid transport (GO:0006865)	120	5	0.87	+	5.76	0.0021	0.104
response to X-ray (GO:0010165)	24	1	0.17	+	5.76	0.165	1
cellular sodium ion homeostasis (GO:0006883)	24	1	0.17	+	5.76	0.165	1
central nervous system myelination (GO:0022010)	24	1	0.17	+	5.76	0.165	1
subpallium development (GO:0021544)	24	1	0.17	+	5.76	0.165	1
cyclic purine nucleotide metabolic process (GO:0052652)	24	1	0.17	+	5.76	0.165	1
protein-lipid complex assembly (GO:0065005)	24	1	0.17	+	5.76	0.165	1
response to amino acid starvation (GO:1990928)	48	2	0.35	+	5.76	0.0501	0.604
Sertoli cell differentiation (GO:0060008)	24	1	0.17	+	5.76	0.165	1
glutamate metabolic process (GO:0006536)	24	1	0.17	+	5.76	0.165	1
cellular response to dexamethasone stimulus (GO:0071549)	24	1	0.17	+	5.76	0.165	1
regulation of glycolytic process (GO:0006110)	48	2	0.35	+	5.76	0.0501	0.603
regulation of collateral sprouting (GO:0048670)	24	1	0.17	+	5.76	0.165	1
axon ensheathment in central nervous system (GO:0032291)	24	1	0.17	+	5.76	0.165	1
protein sumoylation (GO:0016925)	24	1	0.17	+	5.76	0.165	1
response to sterol (GO:0036314)	24	1	0.17	+	5.76	0.165	1
histone deacetylation (GO:0016575)	48	2	0.35	+	5.76	0.0501	0.603
response to interferon-alpha (GO:0035455)	24	1	0.17	+	5.76	0.165	1
cyclic nucleotide biosynthetic process (GO:0009190)	24	1	0.17	+	5.76	0.165	1
fear response (GO:0042596)	48	2	0.35	+	5.76	0.0501	0.602
regulation of gene silencing by miRNA (GO:0060964)	48	2	0.35	+	5.76	0.0501	0.602
positive regulation of insulin receptor signaling pathway (GO:0046628)	24	1	0.17	+	5.76	0.165	1
somatic stem cell population maintenance (GO:0035019)	48	2	0.35	+	5.76	0.0501	0.601
positive regulation of glycoprotein biosynthetic process (GO:0010560)	24	1	0.17	+	5.76	0.165	1
secondary metabolic process (GO:0019748)	48	2	0.35	+	5.76	0.0501	0.601
neuronal stem cell population maintenance (GO:0097150)	24	1	0.17	+	5.76	0.165	1
establishment of monopolar cell polarity (GO:0061162)	24	1	0.17	+	5.76	0.165	1
monosaccharide catabolic process (GO:0046365)	24	1	0.17	+	5.76	0.165	1
epithelial cell proliferation (GO:0050673)	97	4	0.7	+	5.7	0.00609	0.205
regulation of receptor signaling pathway via STAT (GO:1904892)	97	4	0.7	+	5.7	0.00609	0.204
regulation of muscle cell apoptotic process (GO:0010660)	97	4	0.7	+	5.7	0.00609	0.204
regulation of cardiac muscle cell proliferation (GO:0060043)	49	2	0.35	+	5.64	0.0519	0.621
response to glucose (GO:0009749)	98	4	0.71	+	5.64	0.00631	0.21
extrinsic apoptotic signaling pathway (GO:0097191)	98	4	0.71	+	5.64	0.00631	0.209
response to gamma radiation (GO:0010332)	49	2	0.35	+	5.64	0.0519	0.621
negative regulation of peptidase activity (GO:0010466)	245	10	1.77	+	5.64	1.63e-05	0.00274
axoneme assembly (GO:0035082)	74	3	0.54	+	5.61	0.018	0.386
regulation of interleukin-1 production (GO:0032652)	99	4	0.72	+	5.59	0.00652	0.212
post-embryonic development (GO:0009791)	124	5	0.9	+	5.58	0.00241	0.113
negative regulation of cell growth (GO:0030308)	199	8	1.44	+	5.56	0.000129	0.0134
regulation of cellular response to insulin stimulus (GO:1900076)	75	3	0.54	+	5.53	0.0187	0.394
axonal fasciculation (GO:0007413)	25	1	0.18	+	5.53	0.171	1
ether metabolic process (GO:0018904)	25	1	0.18	+	5.53	0.171	1
regulation of erythrocyte differentiation (GO:0045646)	50	2	0.36	+	5.53	0.0538	0.638
trabecula formation (GO:0060343)	25	1	0.18	+	5.53	0.171	1
spinal cord dorsal/ventral patterning (GO:0021513)	25	1	0.18	+	5.53	0.171	1
trophectodermal cell differentiation (GO:0001829)	25	1	0.18	+	5.53	0.171	1
Wnt signaling pathway, planar cell polarity pathway (GO:0060071)	25	1	0.18	+	5.53	0.171	1
negative regulation of interleukin-2 production (GO:0032703)	25	1	0.18	+	5.53	0.171	1
cellular response to interleukin-4 (GO:0071353)	25	1	0.18	+	5.53	0.171	1
thymic T cell selection (GO:0045061)	25	1	0.18	+	5.53	0.171	1
glycosyl compound catabolic process (GO:1901658)	25	1	0.18	+	5.53	0.171	1
muscle cell proliferation (GO:0033002)	25	1	0.18	+	5.53	0.171	1
export across plasma membrane (GO:0140115)	50	2	0.36	+	5.53	0.0538	0.637
regulation of non-canonical Wnt signaling pathway (GO:2000050)	25	1	0.18	+	5.53	0.171	1
gluconeogenesis (GO:0006094)	25	1	0.18	+	5.53	0.171	1
regulation of spindle assembly (GO:0090169)	25	1	0.18	+	5.53	0.171	1
neuron projection fasciculation (GO:0106030)	25	1	0.18	+	5.53	0.171	1
positive regulation of biomineral tissue development (GO:0070169)	50	2	0.36	+	5.53	0.0538	0.637
negative regulation of epithelial cell differentiation (GO:0030857)	50	2	0.36	+	5.53	0.0538	0.636
positive regulation of protein processing (GO:0010954)	25	1	0.18	+	5.53	0.171	1
negative regulation of viral life cycle (GO:1903901)	25	1	0.18	+	5.53	0.171	1
membrane depolarization during action potential (GO:0086010)	25	1	0.18	+	5.53	0.171	1
adrenal gland development (GO:0030325)	25	1	0.18	+	5.53	0.171	1
regulation of production of miRNAs involved in gene silencing by miRNA (GO:1903798)	25	1	0.18	+	5.53	0.171	1
regulation of establishment of protein localization to mitochondrion (GO:1903747)	25	1	0.18	+	5.53	0.171	1
response to arsenic-containing substance (GO:0046685)	25	1	0.18	+	5.53	0.171	1
epithelial structure maintenance (GO:0010669)	25	1	0.18	+	5.53	0.171	1
establishment or maintenance of monopolar cell polarity (GO:0061339)	25	1	0.18	+	5.53	0.171	1
protein-containing complex remodeling (GO:0034367)	25	1	0.18	+	5.53	0.171	1
regulation of plasma lipoprotein particle levels (GO:0097006)	50	2	0.36	+	5.53	0.0538	0.636
response to acid chemical (GO:0001101)	101	4	0.73	+	5.48	0.00698	0.221
response to hexose (GO:0009746)	101	4	0.73	+	5.48	0.00698	0.221
positive regulation of biomineralization (GO:0110151)	51	2	0.37	+	5.42	0.0556	0.653
cranial nerve development (GO:0021545)	51	2	0.37	+	5.42	0.0556	0.652
regulation of posttranscriptional gene silencing (GO:0060147)	51	2	0.37	+	5.42	0.0556	0.652
genitalia development (GO:0048806)	51	2	0.37	+	5.42	0.0556	0.651
cellular response to drug (GO:0035690)	51	2	0.37	+	5.42	0.0556	0.651
regulation of striated muscle tissue development (GO:0016202)	51	2	0.37	+	5.42	0.0556	0.65
negative regulation of mitochondrion organization (GO:0010823)	51	2	0.37	+	5.42	0.0556	0.65
platelet activation (GO:0030168)	51	2	0.37	+	5.42	0.0556	0.649
neuron recognition (GO:0008038)	51	2	0.37	+	5.42	0.0556	0.649
response to monosaccharide (GO:0034284)	102	4	0.74	+	5.42	0.00721	0.224
cellular response to calcium ion (GO:0071277)	77	3	0.56	+	5.39	0.0199	0.414
positive regulation of small molecule metabolic process (GO:0062013)	155	6	1.12	+	5.35	0.0011	0.0667
acyl-CoA metabolic process (GO:0006637)	78	3	0.56	+	5.32	0.0206	0.425
thioester metabolic process (GO:0035383)	78	3	0.56	+	5.32	0.0206	0.425
respiratory system process (GO:0003016)	26	1	0.19	+	5.32	0.177	1
substrate-dependent cell migration (GO:0006929)	26	1	0.19	+	5.32	0.177	1
negative regulation of tissue remodeling (GO:0034104)	26	1	0.19	+	5.32	0.177	1
modified amino acid transport (GO:0072337)	26	1	0.19	+	5.32	0.177	1
positive regulation of glycoprotein metabolic process (GO:1903020)	26	1	0.19	+	5.32	0.177	1
fat-soluble vitamin metabolic process (GO:0006775)	26	1	0.19	+	5.32	0.177	1
chloride transmembrane transport (GO:1902476)	52	2	0.38	+	5.32	0.0575	0.642
regulation of superoxide anion generation (GO:0032928)	26	1	0.19	+	5.32	0.177	1
protein deacetylation (GO:0006476)	52	2	0.38	+	5.32	0.0575	0.642
chondrocyte development (GO:0002063)	26	1	0.19	+	5.32	0.177	1
regulation of production of small RNA involved in gene silencing by RNA (GO:0070920)	26	1	0.19	+	5.32	0.177	1
regulation of AMPA receptor activity (GO:2000311)	26	1	0.19	+	5.32	0.177	1
cellular response to peptide hormone stimulus (GO:0071375)	182	7	1.32	+	5.32	0.000442	0.034
cellular response to glucose stimulus (GO:0071333)	52	2	0.38	+	5.32	0.0575	0.641
motile cilium assembly (GO:0044458)	26	1	0.19	+	5.32	0.177	1
synaptic membrane adhesion (GO:0099560)	26	1	0.19	+	5.32	0.177	1
transepithelial transport (GO:0070633)	26	1	0.19	+	5.32	0.177	1
positive regulation of release of cytochrome c from mitochondria (GO:0090200)	26	1	0.19	+	5.32	0.177	1
intracellular lipid transport (GO:0032365)	26	1	0.19	+	5.32	0.177	1
positive regulation of muscle organ development (GO:0048636)	26	1	0.19	+	5.32	0.177	1
lens fiber cell differentiation (GO:0070306)	26	1	0.19	+	5.32	0.177	1
negative regulation of plasma membrane bounded cell projection assembly (GO:0120033)	26	1	0.19	+	5.32	0.177	1
negative regulation of biomineral tissue development (GO:0070168)	26	1	0.19	+	5.32	0.177	1
histone phosphorylation (GO:0016572)	26	1	0.19	+	5.32	0.177	1
endocrine pancreas development (GO:0031018)	52	2	0.38	+	5.32	0.0575	0.641
positive regulation of cytokine production involved in inflammatory response (GO:1900017)	26	1	0.19	+	5.32	0.177	1
positive regulation of protein import into nucleus (GO:0042307)	52	2	0.38	+	5.32	0.0575	0.64
regulation of gene silencing by RNA (GO:0060966)	52	2	0.38	+	5.32	0.0575	0.64
establishment or maintenance of apical/basal cell polarity (GO:0035088)	52	2	0.38	+	5.32	0.0575	0.64
establishment or maintenance of bipolar cell polarity (GO:0061245)	52	2	0.38	+	5.32	0.0575	0.639
regulation of androgen receptor signaling pathway (GO:0060765)	26	1	0.19	+	5.32	0.177	1
negative regulation of fatty acid metabolic process (GO:0045922)	26	1	0.19	+	5.32	0.177	1
positive regulation of amyloid precursor protein catabolic process (GO:1902993)	26	1	0.19	+	5.32	0.177	1
chaperone-mediated protein folding (GO:0061077)	52	2	0.38	+	5.32	0.0575	0.639
positive regulation of striated muscle tissue development (GO:0045844)	26	1	0.19	+	5.32	0.177	1
response to temperature stimulus (GO:0009266)	157	6	1.14	+	5.28	0.00117	0.069
cell morphogenesis involved in neuron differentiation (GO:0048667)	446	17	3.23	+	5.27	4.19e-08	1.79e-05
T cell activation involved in immune response (GO:0002286)	79	3	0.57	+	5.25	0.0213	0.433
regulation of synaptic transmission, glutamatergic (GO:0051966)	79	3	0.57	+	5.25	0.0213	0.433
negative regulation of ERK1 and ERK2 cascade (GO:0070373)	79	3	0.57	+	5.25	0.0213	0.432
ventral spinal cord development (GO:0021517)	53	2	0.38	+	5.22	0.0594	0.656
eye photoreceptor cell differentiation (GO:0001754)	53	2	0.38	+	5.22	0.0594	0.656
positive regulation of interleukin-1 beta production (GO:0032731)	53	2	0.38	+	5.22	0.0594	0.656
cellular response to oxygen levels (GO:0071453)	106	4	0.77	+	5.22	0.0082	0.248
negative regulation of lymphocyte activation (GO:0051250)	159	6	1.15	+	5.22	0.00125	0.0726
microtubule bundle formation (GO:0001578)	107	4	0.77	+	5.17	0.00846	0.254
regulation of reactive oxygen species biosynthetic process (GO:1903426)	107	4	0.77	+	5.17	0.00846	0.253
positive regulation of erythrocyte differentiation (GO:0045648)	27	1	0.2	+	5.12	0.183	1
negative regulation of biomineralization (GO:0110150)	27	1	0.2	+	5.12	0.183	1
regulation of neuron migration (GO:2001222)	54	2	0.39	+	5.12	0.0613	0.676
spinal cord patterning (GO:0021511)	27	1	0.2	+	5.12	0.183	1
positive regulation of syncytium formation by plasma membrane fusion (GO:0060143)	27	1	0.2	+	5.12	0.183	1
response to dexamethasone (GO:0071548)	27	1	0.2	+	5.12	0.183	1
positive regulation of muscle tissue development (GO:1901863)	27	1	0.2	+	5.12	0.183	1
regulation of muscle tissue development (GO:1901861)	54	2	0.39	+	5.12	0.0613	0.675
regulation of oxidative stress-induced intrinsic apoptotic signaling pathway (GO:1902175)	27	1	0.2	+	5.12	0.183	1
mRNA splice site selection (GO:0006376)	27	1	0.2	+	5.12	0.183	1
regulation of nitric-oxide synthase biosynthetic process (GO:0051769)	27	1	0.2	+	5.12	0.183	1
cellular response to hexose stimulus (GO:0071331)	54	2	0.39	+	5.12	0.0613	0.675
negative regulation of axon extension involved in axon guidance (GO:0048843)	27	1	0.2	+	5.12	0.183	1
response to interleukin-4 (GO:0070670)	27	1	0.2	+	5.12	0.183	1
negative regulation of lipid catabolic process (GO:0050995)	27	1	0.2	+	5.12	0.183	1
cochlea morphogenesis (GO:0090103)	27	1	0.2	+	5.12	0.183	1
digestive tract morphogenesis (GO:0048546)	54	2	0.39	+	5.12	0.0613	0.674
negative regulation of protein secretion (GO:0050709)	108	4	0.78	+	5.12	0.00872	0.259
response to toxic substance (GO:0009636)	108	4	0.78	+	5.12	0.00872	0.258
xenobiotic transport (GO:0042908)	27	1	0.2	+	5.12	0.183	1
thyroid gland development (GO:0030878)	27	1	0.2	+	5.12	0.183	1
positive regulation of G2/M transition of mitotic cell cycle (GO:0010971)	27	1	0.2	+	5.12	0.183	1
regulation of substrate adhesion-dependent cell spreading (GO:1900024)	54	2	0.39	+	5.12	0.0613	0.674
negative regulation of alpha-beta T cell differentiation (GO:0046639)	27	1	0.2	+	5.12	0.183	1
cellular protein-containing complex localization (GO:0034629)	27	1	0.2	+	5.12	0.183	1
positive regulation of lamellipodium assembly (GO:0010592)	27	1	0.2	+	5.12	0.183	1
labyrinthine layer morphogenesis (GO:0060713)	27	1	0.2	+	5.12	0.183	1
fluid transport (GO:0042044)	27	1	0.2	+	5.12	0.183	1
forebrain regionalization (GO:0021871)	27	1	0.2	+	5.12	0.183	1
positive regulation of protein maturation (GO:1903319)	27	1	0.2	+	5.12	0.183	1
sex determination (GO:0007530)	27	1	0.2	+	5.12	0.183	1
nerve development (GO:0021675)	82	3	0.59	+	5.06	0.0234	0.429
regulation of bone mineralization (GO:0030500)	82	3	0.59	+	5.06	0.0234	0.429
negative regulation of osteoblast differentiation (GO:0045668)	55	2	0.4	+	5.03	0.0633	0.67
positive regulation of reactive oxygen species metabolic process (GO:2000379)	110	4	0.8	+	5.03	0.00927	0.267
cellular response to monosaccharide stimulus (GO:0071326)	55	2	0.4	+	5.03	0.0633	0.67
regulation of cholesterol transport (GO:0032374)	55	2	0.4	+	5.03	0.0633	0.67
regulation of sterol transport (GO:0032371)	55	2	0.4	+	5.03	0.0633	0.669
regulation of muscle organ development (GO:0048634)	55	2	0.4	+	5.03	0.0633	0.669
negative regulation of chemotaxis (GO:0050922)	55	2	0.4	+	5.03	0.0633	0.668
positive regulation of epithelial cell differentiation (GO:0030858)	55	2	0.4	+	5.03	0.0633	0.668
positive regulation of tyrosine phosphorylation of STAT protein (GO:0042531)	55	2	0.4	+	5.03	0.0633	0.667
regulation of dendritic spine morphogenesis (GO:0061001)	55	2	0.4	+	5.03	0.0633	0.667
positive regulation of cilium assembly (GO:0045724)	28	1	0.2	+	4.94	0.189	1
apoptotic process involved in development (GO:1902742)	28	1	0.2	+	4.94	0.189	1
hexose biosynthetic process (GO:0019319)	28	1	0.2	+	4.94	0.189	1
regulation of SMAD protein signal transduction (GO:0060390)	28	1	0.2	+	4.94	0.189	1
innervation (GO:0060384)	28	1	0.2	+	4.94	0.189	1
leukocyte apoptotic process (GO:0071887)	28	1	0.2	+	4.94	0.189	1
vitamin metabolic process (GO:0006766)	56	2	0.4	+	4.94	0.0652	0.685
NADH metabolic process (GO:0006734)	28	1	0.2	+	4.94	0.189	1
positive regulation of cardiac muscle cell proliferation (GO:0060045)	28	1	0.2	+	4.94	0.189	1
regulation of sensory perception of pain (GO:0051930)	56	2	0.4	+	4.94	0.0652	0.684
lens morphogenesis in camera-type eye (GO:0002089)	28	1	0.2	+	4.94	0.189	1
endoplasmic reticulum calcium ion homeostasis (GO:0032469)	28	1	0.2	+	4.94	0.189	1
mitochondrial calcium ion homeostasis (GO:0051560)	28	1	0.2	+	4.94	0.189	1
positive regulation of ubiquitin-protein transferase activity (GO:0051443)	28	1	0.2	+	4.94	0.189	1
platelet aggregation (GO:0070527)	28	1	0.2	+	4.94	0.189	1
regulation of monocyte chemotaxis (GO:0090025)	28	1	0.2	+	4.94	0.189	1
thymus development (GO:0048538)	56	2	0.4	+	4.94	0.0652	0.684
circadian behavior (GO:0048512)	28	1	0.2	+	4.94	0.189	1
positive regulation of p38MAPK cascade (GO:1900745)	28	1	0.2	+	4.94	0.189	1
carboxylic acid transmembrane transport (GO:1905039)	112	4	0.81	+	4.94	0.00984	0.275
embryonic hemopoiesis (GO:0035162)	28	1	0.2	+	4.94	0.189	1
determination of adult lifespan (GO:0008340)	28	1	0.2	+	4.94	0.189	1
substrate adhesion-dependent cell spreading (GO:0034446)	56	2	0.4	+	4.94	0.0652	0.683
positive regulation of myeloid leukocyte mediated immunity (GO:0002888)	28	1	0.2	+	4.94	0.189	1
positive regulation of alcohol biosynthetic process (GO:1902932)	28	1	0.2	+	4.94	0.189	1
regulation of pri-miRNA transcription by RNA polymerase II (GO:1902893)	56	2	0.4	+	4.94	0.0652	0.683
cyclic-nucleotide-mediated signaling (GO:0019935)	169	6	1.22	+	4.91	0.00168	0.0916
organic acid transmembrane transport (GO:1903825)	113	4	0.82	+	4.9	0.0101	0.282
regulation of smooth muscle cell migration (GO:0014910)	85	3	0.61	+	4.88	0.0256	0.455
regulation of sensory perception (GO:0051931)	57	2	0.41	+	4.85	0.0672	0.7
negative regulation of G1/S transition of mitotic cell cycle (GO:2000134)	57	2	0.41	+	4.85	0.0672	0.699
regulation of myelination (GO:0031641)	57	2	0.41	+	4.85	0.0672	0.699
heart valve development (GO:0003170)	57	2	0.41	+	4.85	0.0672	0.699
negative regulation of cell development (GO:0010721)	200	7	1.45	+	4.84	0.000758	0.0507
cell morphogenesis involved in differentiation (GO:0000904)	575	20	4.16	+	4.81	1.09e-08	6.14e-06
T cell differentiation (GO:0030217)	173	6	1.25	+	4.8	0.00189	0.0967
negative regulation of response to wounding (GO:1903035)	87	3	0.63	+	4.77	0.0271	0.477
mesenchymal cell development (GO:0014031)	87	3	0.63	+	4.77	0.0271	0.477
regulation of multicellular organism growth (GO:0040014)	87	3	0.63	+	4.77	0.0271	0.476
positive regulation of ossification (GO:0045778)	58	2	0.42	+	4.77	0.0692	0.713
negative regulation of systemic arterial blood pressure (GO:0003085)	29	1	0.21	+	4.77	0.195	1
regulation of stem cell differentiation (GO:2000736)	58	2	0.42	+	4.77	0.0692	0.713
water-soluble vitamin metabolic process (GO:0006767)	29	1	0.21	+	4.77	0.195	1
positive regulation of natural killer cell activation (GO:0032816)	29	1	0.21	+	4.77	0.195	1
sprouting angiogenesis (GO:0002040)	58	2	0.42	+	4.77	0.0692	0.712
regulation of interleukin-2 production (GO:0032663)	58	2	0.42	+	4.77	0.0692	0.712
positive regulation of triglyceride metabolic process (GO:0090208)	29	1	0.21	+	4.77	0.195	1
astrocyte differentiation (GO:0048708)	58	2	0.42	+	4.77	0.0692	0.711
response to carbohydrate (GO:0009743)	116	4	0.84	+	4.77	0.011	0.299
regulation of carbohydrate catabolic process (GO:0043470)	58	2	0.42	+	4.77	0.0692	0.711
positive regulation of CD4-positive, alpha-beta T cell differentiation (GO:0043372)	29	1	0.21	+	4.77	0.195	1
somatic recombination of immunoglobulin gene segments (GO:0016447)	29	1	0.21	+	4.77	0.195	1
positive regulation of protein import (GO:1904591)	58	2	0.42	+	4.77	0.0692	0.71
response to interferon-beta (GO:0035456)	58	2	0.42	+	4.77	0.0692	0.71
positive regulation of cellular response to insulin stimulus (GO:1900078)	29	1	0.21	+	4.77	0.195	1
programmed necrotic cell death (GO:0097300)	29	1	0.21	+	4.77	0.195	1
isoprenoid biosynthetic process (GO:0008299)	29	1	0.21	+	4.77	0.195	1
central nervous system projection neuron axonogenesis (GO:0021952)	29	1	0.21	+	4.77	0.195	1
regulation of cell growth involved in cardiac muscle cell development (GO:0061050)	29	1	0.21	+	4.77	0.195	1
negative regulation of heart contraction (GO:0045822)	29	1	0.21	+	4.77	0.195	1
cell projection morphogenesis (GO:0048858)	494	17	3.57	+	4.76	1.72e-07	5.9e-05
negative regulation of peptide secretion (GO:0002792)	117	4	0.85	+	4.73	0.0114	0.306
regulation of reactive oxygen species metabolic process (GO:2000377)	205	7	1.48	+	4.72	0.000872	0.0564
regulation of Notch signaling pathway (GO:0008593)	88	3	0.64	+	4.71	0.0279	0.483
negative regulation of muscle cell differentiation (GO:0051148)	59	2	0.43	+	4.69	0.0712	0.707
response to wounding (GO:0009611)	325	11	2.35	+	4.68	3.27e-05	0.00478
cAMP-mediated signaling (GO:0019933)	148	5	1.07	+	4.67	0.005	0.181
regulation of cell-matrix adhesion (GO:0001952)	119	4	0.86	+	4.65	0.012	0.317
female sex differentiation (GO:0046660)	119	4	0.86	+	4.65	0.012	0.317
positive regulation of cell cycle G2/M phase transition (GO:1902751)	30	1	0.22	+	4.61	0.2	1
negative regulation of osteoclast differentiation (GO:0045671)	30	1	0.22	+	4.61	0.2	1
cranial nerve morphogenesis (GO:0021602)	30	1	0.22	+	4.61	0.2	1
regulation of regulatory T cell differentiation (GO:0045589)	30	1	0.22	+	4.61	0.2	1
gamma-aminobutyric acid signaling pathway (GO:0007214)	30	1	0.22	+	4.61	0.2	1
neural crest cell differentiation (GO:0014033)	90	3	0.65	+	4.61	0.0295	0.473
regulation of glycogen biosynthetic process (GO:0005979)	30	1	0.22	+	4.61	0.2	1
negative regulation of cAMP-mediated signaling (GO:0043951)	30	1	0.22	+	4.61	0.2	1
embryonic camera-type eye morphogenesis (GO:0048596)	30	1	0.22	+	4.61	0.2	1
digestive tract development (GO:0048565)	120	4	0.87	+	4.61	0.0123	0.324
positive regulation of insulin secretion (GO:0032024)	90	3	0.65	+	4.61	0.0295	0.472
skeletal muscle cell differentiation (GO:0035914)	60	2	0.43	+	4.61	0.0732	0.726
actin-mediated cell contraction (GO:0070252)	60	2	0.43	+	4.61	0.0732	0.725
regulation of glucan biosynthetic process (GO:0010962)	30	1	0.22	+	4.61	0.2	1
positive regulation of phosphatase activity (GO:0010922)	30	1	0.22	+	4.61	0.2	1
positive regulation of phospholipase C activity (GO:0010863)	30	1	0.22	+	4.61	0.2	1
response to nicotine (GO:0035094)	30	1	0.22	+	4.61	0.2	1
negative regulation of ATP metabolic process (GO:1903579)	30	1	0.22	+	4.61	0.2	1
mucopolysaccharide metabolic process (GO:1903510)	60	2	0.43	+	4.61	0.0732	0.725
regulation of T-helper 1 type immune response (GO:0002825)	30	1	0.22	+	4.61	0.2	1
extracellular matrix assembly (GO:0085029)	30	1	0.22	+	4.61	0.2	1
negative regulation of cartilage development (GO:0061037)	30	1	0.22	+	4.61	0.2	1
neuron projection morphogenesis (GO:0048812)	483	16	3.49	+	4.58	6.59e-07	0.000179
regulation of epithelial cell differentiation (GO:0030856)	151	5	1.09	+	4.58	0.00542	0.19
gland morphogenesis (GO:0022612)	121	4	0.87	+	4.57	0.0127	0.331
multicellular organismal response to stress (GO:0033555)	91	3	0.66	+	4.56	0.0303	0.484
cell cycle arrest (GO:0007050)	91	3	0.66	+	4.56	0.0303	0.483
regulation of receptor signaling pathway via JAK-STAT (GO:0046425)	91	3	0.66	+	4.56	0.0303	0.483
negative regulation of protein modification by small protein conjugation or removal (GO:1903321)	91	3	0.66	+	4.56	0.0303	0.482
endochondral bone morphogenesis (GO:0060350)	61	2	0.44	+	4.53	0.0753	0.739
cellular response to fibroblast growth factor stimulus (GO:0044344)	61	2	0.44	+	4.53	0.0753	0.739
regulation of cytokine secretion (GO:0050707)	61	2	0.44	+	4.53	0.0753	0.738
plasma membrane bounded cell projection morphogenesis (GO:0120039)	488	16	3.53	+	4.53	7.51e-07	0.000201
negative regulation of cell cycle G1/S phase transition (GO:1902807)	61	2	0.44	+	4.53	0.0753	0.738
response to peptide hormone (GO:0043434)	275	9	1.99	+	4.53	0.00022	0.0204
cell part morphogenesis (GO:0032990)	520	17	3.76	+	4.52	3.45e-07	0.000101
cellular response to tumor necrosis factor (GO:0071356)	123	4	0.89	+	4.5	0.0134	0.343
negative regulation of cell differentiation (GO:0045596)	678	22	4.9	+	4.49	6.4e-09	4.39e-06
negative regulation of myoblast differentiation (GO:0045662)	31	1	0.22	+	4.46	0.206	1
regulation of B cell differentiation (GO:0045577)	31	1	0.22	+	4.46	0.206	1
regulation of postsynaptic membrane potential (GO:0060078)	62	2	0.45	+	4.46	0.0774	0.739
positive regulation of interleukin-1 production (GO:0032732)	62	2	0.45	+	4.46	0.0774	0.738
negative regulation of extrinsic apoptotic signaling pathway via death domain receptors (GO:1902042)	31	1	0.22	+	4.46	0.206	1
regulation of skeletal muscle tissue development (GO:0048641)	31	1	0.22	+	4.46	0.206	1
axonemal dynein complex assembly (GO:0070286)	31	1	0.22	+	4.46	0.206	1
sulfur amino acid metabolic process (GO:0000096)	31	1	0.22	+	4.46	0.206	1
negative regulation of cardiac muscle tissue growth (GO:0055022)	31	1	0.22	+	4.46	0.206	1
hormone biosynthetic process (GO:0042446)	31	1	0.22	+	4.46	0.206	1
regulation of tumor necrosis factor-mediated signaling pathway (GO:0010803)	31	1	0.22	+	4.46	0.206	1
DNA damage response, signal transduction by p53 class mediator (GO:0030330)	31	1	0.22	+	4.46	0.206	1
positive regulation of smooth muscle cell migration (GO:0014911)	62	2	0.45	+	4.46	0.0774	0.738
negative regulation of blood circulation (GO:1903523)	31	1	0.22	+	4.46	0.206	1
regulation of type 2 immune response (GO:0002828)	31	1	0.22	+	4.46	0.206	1
negative regulation of heart growth (GO:0061117)	31	1	0.22	+	4.46	0.206	1
protein localization to cell surface (GO:0034394)	31	1	0.22	+	4.46	0.206	1
response to interferon-gamma (GO:0034341)	124	4	0.9	+	4.46	0.0137	0.349
positive regulation of cartilage development (GO:0061036)	31	1	0.22	+	4.46	0.206	1
regulation of lymphocyte differentiation (GO:0045619)	187	6	1.35	+	4.44	0.00275	0.124
regulation of smoothened signaling pathway (GO:0008589)	94	3	0.68	+	4.41	0.0328	0.51
cilium movement (GO:0003341)	157	5	1.14	+	4.4	0.00634	0.21
response to fibroblast growth factor (GO:0071774)	63	2	0.46	+	4.39	0.0795	0.756
cellular response to carbohydrate stimulus (GO:0071322)	63	2	0.46	+	4.39	0.0795	0.756
hormone transport (GO:0009914)	95	3	0.69	+	4.37	0.0337	0.516
negative regulation of leukocyte activation (GO:0002695)	190	6	1.37	+	4.37	0.00297	0.129
response to calcium ion (GO:0051592)	127	4	0.92	+	4.36	0.0148	0.333
establishment of cell polarity (GO:0030010)	127	4	0.92	+	4.36	0.0148	0.332
negative regulation of neurogenesis (GO:0050768)	159	5	1.15	+	4.35	0.00667	0.216
glial cell differentiation (GO:0010001)	191	6	1.38	+	4.34	0.00304	0.132
positive regulation of G protein-coupled receptor signaling pathway (GO:0045745)	32	1	0.23	+	4.32	0.212	1
epithelial tube branching involved in lung morphogenesis (GO:0060441)	32	1	0.23	+	4.32	0.212	1
secondary alcohol biosynthetic process (GO:1902653)	32	1	0.23	+	4.32	0.212	1
maternal placenta development (GO:0001893)	32	1	0.23	+	4.32	0.212	1
cholesterol biosynthetic process (GO:0006695)	32	1	0.23	+	4.32	0.212	1
B cell homeostasis (GO:0001782)	32	1	0.23	+	4.32	0.212	1
negative regulation of CD4-positive, alpha-beta T cell activation (GO:2000515)	32	1	0.23	+	4.32	0.212	1
acetylcholine receptor signaling pathway (GO:0095500)	32	1	0.23	+	4.32	0.212	1
positive regulation of interleukin-2 production (GO:0032743)	32	1	0.23	+	4.32	0.212	1
ovarian follicle development (GO:0001541)	64	2	0.46	+	4.32	0.0816	0.771
regulation of superoxide metabolic process (GO:0090322)	32	1	0.23	+	4.32	0.212	1
negative regulation of canonical Wnt signaling pathway (GO:0090090)	128	4	0.93	+	4.32	0.0152	0.334
ERK1 and ERK2 cascade (GO:0070371)	32	1	0.23	+	4.32	0.212	1
endothelial cell migration (GO:0043542)	64	2	0.46	+	4.32	0.0816	0.771
regulation of smooth muscle cell differentiation (GO:0051150)	32	1	0.23	+	4.32	0.212	1
necrotic cell death (GO:0070265)	32	1	0.23	+	4.32	0.212	1
ephrin receptor signaling pathway (GO:0048013)	32	1	0.23	+	4.32	0.212	1
microtubule polymerization (GO:0046785)	32	1	0.23	+	4.32	0.212	1
coronary vasculature morphogenesis (GO:0060977)	32	1	0.23	+	4.32	0.212	1
regulation of vascular endothelial growth factor production (GO:0010574)	32	1	0.23	+	4.32	0.212	1
myotube cell development (GO:0014904)	32	1	0.23	+	4.32	0.212	1
cell differentiation involved in embryonic placenta development (GO:0060706)	32	1	0.23	+	4.32	0.212	1
mammary gland epithelium development (GO:0061180)	64	2	0.46	+	4.32	0.0816	0.771
embryonic placenta morphogenesis (GO:0060669)	32	1	0.23	+	4.32	0.212	1
negative regulation of cell-cell adhesion (GO:0022408)	193	6	1.4	+	4.3	0.0032	0.137
morphogenesis of a branching epithelium (GO:0061138)	193	6	1.4	+	4.3	0.0032	0.137
transmembrane receptor protein tyrosine kinase signaling pathway (GO:0007169)	354	11	2.56	+	4.3	6.89e-05	0.00812
regulation of cellular carbohydrate metabolic process (GO:0010675)	161	5	1.16	+	4.29	0.00702	0.221
negative regulation of Wnt signaling pathway (GO:0030178)	161	5	1.16	+	4.29	0.00702	0.221
hair follicle development (GO:0001942)	97	3	0.7	+	4.28	0.0354	0.508
steroid biosynthetic process (GO:0006694)	97	3	0.7	+	4.28	0.0354	0.507
regulation of carbohydrate metabolic process (GO:0006109)	194	6	1.4	+	4.28	0.00328	0.139
sensory perception of mechanical stimulus (GO:0050954)	194	6	1.4	+	4.28	0.00328	0.138
cellular modified amino acid metabolic process (GO:0006575)	162	5	1.17	+	4.27	0.00719	0.224
regulation of peptidase activity (GO:0052547)	422	13	3.05	+	4.26	1.63e-05	0.00276
epithelial to mesenchymal transition (GO:0001837)	65	2	0.47	+	4.26	0.0837	0.773
lymphocyte homeostasis (GO:0002260)	65	2	0.47	+	4.26	0.0837	0.773
hematopoietic progenitor cell differentiation (GO:0002244)	130	4	0.94	+	4.26	0.016	0.347
negative regulation of nervous system development (GO:0051961)	163	5	1.18	+	4.24	0.00737	0.228
sensory perception of sound (GO:0007605)	163	5	1.18	+	4.24	0.00737	0.227
negative regulation of growth (GO:0045926)	261	8	1.89	+	4.24	0.000746	0.051
protein import into nucleus (GO:0006606)	98	3	0.71	+	4.23	0.0363	0.519
regulation of muscle adaptation (GO:0043502)	98	3	0.71	+	4.23	0.0363	0.518
cellular response to peptide (GO:1901653)	229	7	1.66	+	4.23	0.00162	0.0899
negative regulation of cytokine production (GO:0001818)	263	8	1.9	+	4.21	0.000783	0.0517
regulation of toll-like receptor signaling pathway (GO:0034121)	66	2	0.48	+	4.19	0.0858	0.789
regulation of keratinocyte differentiation (GO:0045616)	33	1	0.24	+	4.19	0.217	1
cell volume homeostasis (GO:0006884)	33	1	0.24	+	4.19	0.217	1
negative regulation of extrinsic apoptotic signaling pathway in absence of ligand (GO:2001240)	33	1	0.24	+	4.19	0.217	1
transmission of nerve impulse (GO:0019226)	66	2	0.48	+	4.19	0.0858	0.788
camera-type eye photoreceptor cell differentiation (GO:0060219)	33	1	0.24	+	4.19	0.217	1
NADP metabolic process (GO:0006739)	33	1	0.24	+	4.19	0.217	1
regulation of syncytium formation by plasma membrane fusion (GO:0060142)	33	1	0.24	+	4.19	0.217	1
cellular response to insulin stimulus (GO:0032869)	132	4	0.95	+	4.19	0.0168	0.363
positive regulation of telomerase activity (GO:0051973)	33	1	0.24	+	4.19	0.217	1
GPI anchor metabolic process (GO:0006505)	33	1	0.24	+	4.19	0.217	1
regulation of phosphatidylinositol 3-kinase signaling (GO:0014066)	99	3	0.72	+	4.19	0.0372	0.53
regulation of receptor internalization (GO:0002090)	66	2	0.48	+	4.19	0.0858	0.788
cellular response to interferon-gamma (GO:0071346)	99	3	0.72	+	4.19	0.0372	0.529
T cell differentiation in thymus (GO:0033077)	66	2	0.48	+	4.19	0.0858	0.787
cellular response to mechanical stimulus (GO:0071260)	33	1	0.24	+	4.19	0.217	1
centrosome localization (GO:0051642)	33	1	0.24	+	4.19	0.217	1
regulation of axon extension involved in axon guidance (GO:0048841)	33	1	0.24	+	4.19	0.217	1
pigment cell differentiation (GO:0050931)	33	1	0.24	+	4.19	0.217	1
negative regulation of protein transport (GO:0051224)	165	5	1.19	+	4.19	0.00774	0.237
receptor internalization (GO:0031623)	66	2	0.48	+	4.19	0.0858	0.787
negative regulation of signal transduction in absence of ligand (GO:1901099)	33	1	0.24	+	4.19	0.217	1
regulation of striated muscle cell differentiation (GO:0051153)	99	3	0.72	+	4.19	0.0372	0.529
regulation of biomineral tissue development (GO:0070167)	99	3	0.72	+	4.19	0.0372	0.528
hair follicle morphogenesis (GO:0031069)	33	1	0.24	+	4.19	0.217	1
apoptotic mitochondrial changes (GO:0008637)	66	2	0.48	+	4.19	0.0858	0.786
cell communication involved in cardiac conduction (GO:0086065)	33	1	0.24	+	4.19	0.217	1
serine family amino acid metabolic process (GO:0009069)	33	1	0.24	+	4.19	0.217	1
cardiac muscle cell action potential involved in contraction (GO:0086002)	33	1	0.24	+	4.19	0.217	1
regulation of protein export from nucleus (GO:0046825)	33	1	0.24	+	4.19	0.217	1
negative regulation of gene silencing (GO:0060969)	33	1	0.24	+	4.19	0.217	1
endocardial cushion morphogenesis (GO:0003203)	33	1	0.24	+	4.19	0.217	1
negative regulation of GTPase activity (GO:0034260)	33	1	0.24	+	4.19	0.217	1
digestive system development (GO:0055123)	133	4	0.96	+	4.16	0.0172	0.37
cellular response to hormone stimulus (GO:0032870)	366	11	2.65	+	4.16	9.18e-05	0.0103
skin epidermis development (GO:0098773)	100	3	0.72	+	4.15	0.0381	0.538
regeneration (GO:0031099)	100	3	0.72	+	4.15	0.0381	0.538
organ growth (GO:0035265)	100	3	0.72	+	4.15	0.0381	0.537
hair cycle process (GO:0022405)	100	3	0.72	+	4.15	0.0381	0.537
molting cycle process (GO:0022404)	100	3	0.72	+	4.15	0.0381	0.536
response to hormone (GO:0009725)	567	17	4.1	+	4.15	1.1e-06	0.000284
columnar/cuboidal epithelial cell development (GO:0002066)	67	2	0.48	+	4.13	0.088	0.805
renal system process (GO:0003014)	101	3	0.73	+	4.11	0.0391	0.546
regulation of biomineralization (GO:0110149)	101	3	0.73	+	4.11	0.0391	0.546
negative regulation of extrinsic apoptotic signaling pathway (GO:2001237)	101	3	0.73	+	4.11	0.0391	0.545
negative regulation of cellular response to growth factor stimulus (GO:0090288)	101	3	0.73	+	4.11	0.0391	0.545
negative regulation of hydrolase activity (GO:0051346)	404	12	2.92	+	4.11	4.9e-05	0.00633
flagellated sperm motility (GO:0030317)	101	3	0.73	+	4.11	0.0391	0.544
endocrine system development (GO:0035270)	135	4	0.98	+	4.1	0.018	0.385
cell morphogenesis (GO:0000902)	743	22	5.37	+	4.09	3.13e-08	1.45e-05
morphogenesis of a branching structure (GO:0001763)	203	6	1.47	+	4.09	0.00406	0.161
cell-cell adhesion (GO:0098609)	406	12	2.94	+	4.09	5.13e-05	0.00647
neuron projection development (GO:0031175)	711	21	5.14	+	4.08	6.91e-08	2.48e-05
positive regulation of lamellipodium organization (GO:1902745)	34	1	0.25	+	4.07	0.223	1
negative regulation of toll-like receptor signaling pathway (GO:0034122)	34	1	0.25	+	4.07	0.223	1
telencephalon cell migration (GO:0022029)	68	2	0.49	+	4.07	0.0902	0.802
ventricular system development (GO:0021591)	34	1	0.25	+	4.07	0.223	1
startle response (GO:0001964)	34	1	0.25	+	4.07	0.223	1
leukocyte activation involved in inflammatory response (GO:0002269)	34	1	0.25	+	4.07	0.223	1
microglial cell activation (GO:0001774)	34	1	0.25	+	4.07	0.223	1
positive regulation of CD4-positive, alpha-beta T cell activation (GO:2000516)	34	1	0.25	+	4.07	0.223	1
positive regulation of interferon-beta production (GO:0032728)	34	1	0.25	+	4.07	0.223	1
negative regulation of reactive oxygen species metabolic process (GO:2000378)	68	2	0.49	+	4.07	0.0902	0.801
positive regulation of cAMP-mediated signaling (GO:0043950)	34	1	0.25	+	4.07	0.223	1
regulation of cAMP-mediated signaling (GO:0043949)	68	2	0.49	+	4.07	0.0902	0.801
aminoglycan metabolic process (GO:0006022)	102	3	0.74	+	4.07	0.04	0.554
regulation of neutrophil chemotaxis (GO:0090022)	34	1	0.25	+	4.07	0.223	1
negative regulation of axonogenesis (GO:0050771)	68	2	0.49	+	4.07	0.0902	0.801
regulation of postsynapse organization (GO:0099175)	102	3	0.74	+	4.07	0.04	0.554
import into nucleus (GO:0051170)	102	3	0.74	+	4.07	0.04	0.553
inorganic anion transmembrane transport (GO:0098661)	68	2	0.49	+	4.07	0.0902	0.8
negative regulation of establishment of protein localization (GO:1904950)	170	5	1.23	+	4.07	0.00871	0.259
positive regulation of leukocyte degranulation (GO:0043302)	34	1	0.25	+	4.07	0.223	1
regulation of neuronal synaptic plasticity (GO:0048168)	68	2	0.49	+	4.07	0.0902	0.8
regulation of purine nucleotide biosynthetic process (GO:1900371)	34	1	0.25	+	4.07	0.223	1
regulation of nucleotide biosynthetic process (GO:0030808)	34	1	0.25	+	4.07	0.223	1
cellular response to acetylcholine (GO:1905145)	34	1	0.25	+	4.07	0.223	1
response to acetylcholine (GO:1905144)	34	1	0.25	+	4.07	0.223	1
regulation of phospholipase C activity (GO:1900274)	34	1	0.25	+	4.07	0.223	1
microtubule organizing center localization (GO:0061842)	34	1	0.25	+	4.07	0.223	1
detection of stimulus involved in sensory perception of pain (GO:0062149)	34	1	0.25	+	4.07	0.223	1
female gonad development (GO:0008585)	102	3	0.74	+	4.07	0.04	0.553
mRNA destabilization (GO:0061157)	34	1	0.25	+	4.07	0.223	1
circadian rhythm (GO:0007623)	136	4	0.98	+	4.07	0.0185	0.39
monosaccharide biosynthetic process (GO:0046364)	34	1	0.25	+	4.07	0.223	1
forebrain neuron development (GO:0021884)	34	1	0.25	+	4.07	0.223	1
establishment of endothelial barrier (GO:0061028)	34	1	0.25	+	4.07	0.223	1
negative regulation of proteolysis (GO:0045861)	342	10	2.47	+	4.04	0.000238	0.0212
stem cell population maintenance (GO:0019827)	137	4	0.99	+	4.04	0.0189	0.398
response to unfolded protein (GO:0006986)	103	3	0.74	+	4.03	0.041	0.561
sex differentiation (GO:0007548)	275	8	1.99	+	4.02	0.00104	0.0648
positive regulation of fat cell differentiation (GO:0045600)	69	2	0.5	+	4.01	0.0924	0.816
diencephalon development (GO:0021536)	69	2	0.5	+	4.01	0.0924	0.816
regulation of synaptic vesicle exocytosis (GO:2000300)	69	2	0.5	+	4.01	0.0924	0.815
neuromuscular process controlling balance (GO:0050885)	69	2	0.5	+	4.01	0.0924	0.815
response to insulin (GO:0032868)	173	5	1.25	+	4	0.00933	0.268
sperm motility (GO:0097722)	104	3	0.75	+	3.99	0.0419	0.571
cellular response to oxidative stress (GO:0034599)	208	6	1.5	+	3.99	0.00456	0.17
cellular response to chemical stress (GO:0062197)	243	7	1.76	+	3.98	0.00224	0.108
myeloid cell homeostasis (GO:0002262)	139	4	1.01	+	3.98	0.0198	0.412
negative regulation of MAPK cascade (GO:0043409)	174	5	1.26	+	3.97	0.00955	0.272
negative regulation of Notch signaling pathway (GO:0045746)	35	1	0.25	+	3.95	0.229	1
neuronal action potential (GO:0019228)	35	1	0.25	+	3.95	0.229	1
regulation of mitotic spindle organization (GO:0060236)	35	1	0.25	+	3.95	0.229	1
dopaminergic neuron differentiation (GO:0071542)	35	1	0.25	+	3.95	0.229	1
temperature homeostasis (GO:0001659)	35	1	0.25	+	3.95	0.229	1
phosphatidylinositol 3-kinase signaling (GO:0014065)	35	1	0.25	+	3.95	0.229	1
positive regulation of mast cell activation (GO:0033005)	35	1	0.25	+	3.95	0.229	1
regulation of amyloid-beta formation (GO:1902003)	35	1	0.25	+	3.95	0.229	1
establishment of epithelial cell polarity (GO:0090162)	35	1	0.25	+	3.95	0.229	1
regulation of synapse organization (GO:0050807)	245	7	1.77	+	3.95	0.00234	0.112
regulation of long-term neuronal synaptic plasticity (GO:0048169)	35	1	0.25	+	3.95	0.229	1
regulation of B cell proliferation (GO:0030888)	70	2	0.51	+	3.95	0.0946	0.833
negative regulation of fibroblast proliferation (GO:0048147)	35	1	0.25	+	3.95	0.229	1
nucleobase metabolic process (GO:0009112)	35	1	0.25	+	3.95	0.229	1
regulation of heart rate by cardiac conduction (GO:0086091)	35	1	0.25	+	3.95	0.229	1
cellular modified amino acid biosynthetic process (GO:0042398)	35	1	0.25	+	3.95	0.229	1
negative regulation of epithelial to mesenchymal transition (GO:0010719)	35	1	0.25	+	3.95	0.229	1
development of primary female sexual characteristics (GO:0046545)	105	3	0.76	+	3.95	0.0429	0.558
regulation of calcium ion transport into cytosol (GO:0010522)	105	3	0.76	+	3.95	0.0429	0.558
regulation of cell fate commitment (GO:0010453)	35	1	0.25	+	3.95	0.229	1
stem cell differentiation (GO:0048863)	175	5	1.27	+	3.95	0.00976	0.276
growth (GO:0040007)	458	13	3.31	+	3.93	3.72e-05	0.0051
maintenance of cell number (GO:0098727)	141	4	1.02	+	3.92	0.0207	0.426
regulation of muscle cell differentiation (GO:0051147)	141	4	1.02	+	3.92	0.0207	0.426
adult locomotory behavior (GO:0008344)	106	3	0.77	+	3.91	0.0439	0.569
response to starvation (GO:0042594)	177	5	1.28	+	3.91	0.0102	0.284
regulation of cardiac muscle hypertrophy (GO:0010611)	71	2	0.51	+	3.9	0.0968	0.83
lymphocyte differentiation (GO:0030098)	284	8	2.05	+	3.9	0.00126	0.0733
regulation of myeloid leukocyte mediated immunity (GO:0002886)	71	2	0.51	+	3.9	0.0968	0.829
forebrain cell migration (GO:0021885)	71	2	0.51	+	3.9	0.0968	0.829
cilium movement involved in cell motility (GO:0060294)	107	3	0.77	+	3.88	0.0449	0.575
regionalization (GO:0003002)	357	10	2.58	+	3.87	0.000332	0.0264
cellular component morphogenesis (GO:0032989)	608	17	4.4	+	3.87	2.75e-06	0.000638
regulation of stress-activated MAPK cascade (GO:0032872)	179	5	1.29	+	3.86	0.0107	0.293
cellular response to inorganic substance (GO:0071241)	179	5	1.29	+	3.86	0.0107	0.293
regulation of cell-substrate adhesion (GO:0010810)	215	6	1.55	+	3.86	0.00532	0.188
negative regulation of neuron death (GO:1901215)	252	7	1.82	+	3.84	0.00273	0.125
regulation of T-helper cell differentiation (GO:0045622)	36	1	0.26	+	3.84	0.234	1
cellular response to fatty acid (GO:0071398)	36	1	0.26	+	3.84	0.234	1
neuron fate specification (GO:0048665)	36	1	0.26	+	3.84	0.234	1
protein insertion into membrane (GO:0051205)	36	1	0.26	+	3.84	0.234	1
nuclear-transcribed mRNA catabolic process, deadenylation-dependent decay (GO:0000288)	36	1	0.26	+	3.84	0.234	1
positive regulation of vascular associated smooth muscle cell proliferation (GO:1904707)	36	1	0.26	+	3.84	0.234	1
regulation of carbohydrate biosynthetic process (GO:0043255)	108	3	0.78	+	3.84	0.0459	0.586
embryonic eye morphogenesis (GO:0048048)	36	1	0.26	+	3.84	0.234	1
phosphatidylinositol-mediated signaling (GO:0048015)	72	2	0.52	+	3.84	0.0991	0.845
somatic diversification of immunoglobulins (GO:0016445)	36	1	0.26	+	3.84	0.234	1
non-canonical Wnt signaling pathway (GO:0035567)	36	1	0.26	+	3.84	0.234	1
hair cycle (GO:0042633)	108	3	0.78	+	3.84	0.0459	0.586
positive regulation of nucleocytoplasmic transport (GO:0046824)	72	2	0.52	+	3.84	0.0991	0.844
regulation of keratinocyte proliferation (GO:0010837)	36	1	0.26	+	3.84	0.234	1
molting cycle (GO:0042303)	108	3	0.78	+	3.84	0.0459	0.585
cellular monovalent inorganic cation homeostasis (GO:0030004)	108	3	0.78	+	3.84	0.0459	0.585
negative regulation of endopeptidase activity (GO:0010951)	181	5	1.31	+	3.82	0.0111	0.301
homeostasis of number of cells (GO:0048872)	290	8	2.1	+	3.81	0.00144	0.081
protein import (GO:0017038)	145	4	1.05	+	3.81	0.0226	0.419
response to tumor necrosis factor (GO:0034612)	145	4	1.05	+	3.81	0.0226	0.419
regulation of cytokine-mediated signaling pathway (GO:0001959)	109	3	0.79	+	3.81	0.0469	0.596
negative regulation of cell adhesion (GO:0007162)	291	8	2.1	+	3.8	0.00147	0.0825
regulation of stress-activated protein kinase signaling cascade (GO:0070302)	182	5	1.32	+	3.8	0.0114	0.306
negative regulation of neuron apoptotic process (GO:0043524)	182	5	1.32	+	3.8	0.0114	0.306
neuron migration (GO:0001764)	146	4	1.06	+	3.79	0.0231	0.426
positive regulation of phosphatidylinositol 3-kinase signaling (GO:0014068)	73	2	0.53	+	3.79	0.101	0.861
telomere maintenance (GO:0000723)	73	2	0.53	+	3.79	0.101	0.86
regulation of intracellular pH (GO:0051453)	73	2	0.53	+	3.79	0.101	0.86
regulation of gene silencing (GO:0060968)	73	2	0.53	+	3.79	0.101	0.859
cellular response to unfolded protein (GO:0034620)	73	2	0.53	+	3.79	0.101	0.859
photoreceptor cell differentiation (GO:0046530)	73	2	0.53	+	3.79	0.101	0.858
cellular response to organonitrogen compound (GO:0071417)	439	12	3.17	+	3.78	0.000105	0.0116
positive regulation of protein catabolic process (GO:0045732)	220	6	1.59	+	3.77	0.00592	0.2
positive regulation of cell death (GO:0010942)	661	18	4.78	+	3.77	1.97e-06	0.000465
ossification (GO:0001503)	221	6	1.6	+	3.75	0.00604	0.203
developmental growth (GO:0048589)	442	12	3.2	+	3.75	0.000112	0.012
regulation of synapse structure or activity (GO:0050803)	258	7	1.87	+	3.75	0.0031	0.134
positive regulation of animal organ morphogenesis (GO:0110110)	37	1	0.27	+	3.74	0.24	1
spinal cord motor neuron differentiation (GO:0021522)	37	1	0.27	+	3.74	0.24	1
kidney development (GO:0001822)	296	8	2.14	+	3.74	0.00163	0.0903
negative regulation of intracellular steroid hormone receptor signaling pathway (GO:0033144)	37	1	0.27	+	3.74	0.24	1
regulation of glycogen metabolic process (GO:0070873)	37	1	0.27	+	3.74	0.24	1
telomere organization (GO:0032200)	74	2	0.54	+	3.74	0.104	0.855
RNA destabilization (GO:0050779)	37	1	0.27	+	3.74	0.24	1
response to mechanical stimulus (GO:0009612)	148	4	1.07	+	3.74	0.0241	0.436
regulation of mast cell degranulation (GO:0043304)	37	1	0.27	+	3.74	0.24	1
anion homeostasis (GO:0055081)	74	2	0.54	+	3.74	0.104	0.854
sodium ion homeostasis (GO:0055078)	37	1	0.27	+	3.74	0.24	1
neutrophil chemotaxis (GO:0030593)	74	2	0.54	+	3.74	0.104	0.854
regulation of cardiac muscle cell contraction (GO:0086004)	37	1	0.27	+	3.74	0.24	1
regulation of protein import into nucleus (GO:0042306)	74	2	0.54	+	3.74	0.104	0.854
regulation of insulin receptor signaling pathway (GO:0046626)	74	2	0.54	+	3.74	0.104	0.853
negative regulation of reactive oxygen species biosynthetic process (GO:1903427)	37	1	0.27	+	3.74	0.24	1
negative regulation of JNK cascade (GO:0046329)	37	1	0.27	+	3.74	0.24	1
regulation of fatty acid oxidation (GO:0046320)	37	1	0.27	+	3.74	0.24	1
regulation of muscle hypertrophy (GO:0014743)	74	2	0.54	+	3.74	0.104	0.853
negative regulation of immune system process (GO:0002683)	410	11	2.96	+	3.71	0.00024	0.0213
cardiac muscle contraction (GO:0060048)	75	2	0.54	+	3.69	0.106	0.868
protein folding (GO:0006457)	150	4	1.08	+	3.69	0.0252	0.45
cellular polysaccharide metabolic process (GO:0044264)	75	2	0.54	+	3.69	0.106	0.868
mammary gland development (GO:0030879)	150	4	1.08	+	3.69	0.0252	0.45
negative regulation of autophagy (GO:0010507)	75	2	0.54	+	3.69	0.106	0.867
regulation of insulin secretion (GO:0050796)	188	5	1.36	+	3.68	0.0129	0.334
response to peptide (GO:1901652)	339	9	2.45	+	3.67	0.000951	0.0608
multicellular organismal signaling (GO:0035637)	113	3	0.82	+	3.67	0.0512	0.612
regulation of leukocyte differentiation (GO:1902105)	302	8	2.18	+	3.66	0.00184	0.0962
second-messenger-mediated signaling (GO:0019932)	303	8	2.19	+	3.65	0.00188	0.0966
negative regulation of developmental process (GO:0051093)	947	25	6.85	+	3.65	2.94e-08	1.4e-05
regulation of hemopoiesis (GO:1903706)	380	10	2.75	+	3.64	0.000533	0.0399
olfactory bulb development (GO:0021772)	38	1	0.27	+	3.64	0.245	1
somatic diversification of immune receptors via germline recombination within a single locus (GO:0002562)	38	1	0.27	+	3.64	0.245	1
excitatory postsynaptic potential (GO:0060079)	38	1	0.27	+	3.64	0.245	1
semaphorin-plexin signaling pathway (GO:0071526)	38	1	0.27	+	3.64	0.245	1
regulation of cellular amine metabolic process (GO:0033238)	38	1	0.27	+	3.64	0.245	1
cellular glucose homeostasis (GO:0001678)	76	2	0.55	+	3.64	0.108	0.884
tumor necrosis factor-mediated signaling pathway (GO:0033209)	38	1	0.27	+	3.64	0.245	1
positive regulation of interleukin-10 production (GO:0032733)	38	1	0.27	+	3.64	0.245	1
nucleosome assembly (GO:0006334)	76	2	0.55	+	3.64	0.108	0.884
regulation of mast cell activation involved in immune response (GO:0033006)	38	1	0.27	+	3.64	0.245	1
epidermis morphogenesis (GO:0048730)	38	1	0.27	+	3.64	0.245	1
cellular response to vascular endothelial growth factor stimulus (GO:0035924)	38	1	0.27	+	3.64	0.245	1
intrinsic apoptotic signaling pathway in response to endoplasmic reticulum stress (GO:0070059)	38	1	0.27	+	3.64	0.245	1
response to alkaloid (GO:0043279)	76	2	0.55	+	3.64	0.108	0.883
oligosaccharide metabolic process (GO:0009311)	38	1	0.27	+	3.64	0.245	1
inositol lipid-mediated signaling (GO:0048017)	76	2	0.55	+	3.64	0.108	0.883
somatic cell DNA recombination (GO:0016444)	38	1	0.27	+	3.64	0.245	1
cardiac muscle cell action potential (GO:0086001)	38	1	0.27	+	3.64	0.245	1
sterol biosynthetic process (GO:0016126)	38	1	0.27	+	3.64	0.245	1
regulation of alpha-beta T cell proliferation (GO:0046640)	38	1	0.27	+	3.64	0.245	1
negative regulation of insulin receptor signaling pathway (GO:0046627)	38	1	0.27	+	3.64	0.245	1
cellular response to alcohol (GO:0097306)	76	2	0.55	+	3.64	0.108	0.883
positive regulation of epithelial cell apoptotic process (GO:1904037)	38	1	0.27	+	3.64	0.245	1
placenta blood vessel development (GO:0060674)	38	1	0.27	+	3.64	0.245	1
neuron development (GO:0048666)	876	23	6.33	+	3.63	1.23e-07	4.32e-05
anion transmembrane transport (GO:0098656)	191	5	1.38	+	3.62	0.0137	0.349
cilium-dependent cell motility (GO:0060285)	115	3	0.83	+	3.61	0.0533	0.635
cilium or flagellum-dependent cell motility (GO:0001539)	115	3	0.83	+	3.61	0.0533	0.634
regulation of neuron differentiation (GO:0045664)	231	6	1.67	+	3.59	0.00741	0.228
cellular response to metal ion (GO:0071248)	154	4	1.11	+	3.59	0.0273	0.479
negative regulation of multicellular organismal process (GO:0051241)	1078	28	7.8	+	3.59	5.42e-09	4.5e-06
regulation of lymphocyte proliferation (GO:0050670)	231	6	1.67	+	3.59	0.00741	0.227
regulation of cardiac muscle tissue growth (GO:0055021)	77	2	0.56	+	3.59	0.11	0.883
aging (GO:0007568)	154	4	1.11	+	3.59	0.0273	0.479
neuron differentiation (GO:0030182)	1079	28	7.8	+	3.59	5.52e-09	4.15e-06
multicellular organism growth (GO:0035264)	116	3	0.84	+	3.58	0.0544	0.642
response to metal ion (GO:0010038)	271	7	1.96	+	3.57	0.00403	0.16
regulation of T cell differentiation (GO:0045580)	155	4	1.12	+	3.57	0.0279	0.485
regulation of interleukin-6 production (GO:0032675)	155	4	1.12	+	3.57	0.0279	0.484
cellular response to starvation (GO:0009267)	155	4	1.12	+	3.57	0.0279	0.484
renal system development (GO:0072001)	311	8	2.25	+	3.56	0.0022	0.107
regulation of apoptotic signaling pathway (GO:2001233)	389	10	2.81	+	3.55	0.000636	0.0456
glutamate receptor signaling pathway (GO:0007215)	39	1	0.28	+	3.55	0.251	1
regulation of glial cell proliferation (GO:0060251)	39	1	0.28	+	3.55	0.251	1
regulation of polysaccharide biosynthetic process (GO:0032885)	39	1	0.28	+	3.55	0.251	1
sarcomere organization (GO:0045214)	39	1	0.28	+	3.55	0.251	1
positive regulation of interleukin-12 production (GO:0032735)	39	1	0.28	+	3.55	0.251	1
Schwann cell differentiation (GO:0014037)	39	1	0.28	+	3.55	0.251	1
polysaccharide metabolic process (GO:0005976)	78	2	0.56	+	3.55	0.113	0.9
mesenchymal cell differentiation (GO:0048762)	156	4	1.13	+	3.55	0.0284	0.462
regulation of spindle organization (GO:0090224)	39	1	0.28	+	3.55	0.251	1
regulation of protein localization to cell surface (GO:2000008)	39	1	0.28	+	3.55	0.251	1
regulation of cell migration involved in sprouting angiogenesis (GO:0090049)	39	1	0.28	+	3.55	0.251	1
positive regulation of calcium-mediated signaling (GO:0050850)	39	1	0.28	+	3.55	0.251	1
response to steroid hormone (GO:0048545)	156	4	1.13	+	3.55	0.0284	0.461
negative regulation of striated muscle cell differentiation (GO:0051154)	39	1	0.28	+	3.55	0.251	1
positive regulation of substrate adhesion-dependent cell spreading (GO:1900026)	39	1	0.28	+	3.55	0.251	1
pituitary gland development (GO:0021983)	39	1	0.28	+	3.55	0.251	1
adipose tissue development (GO:0060612)	39	1	0.28	+	3.55	0.251	1
mammary gland duct morphogenesis (GO:0060603)	39	1	0.28	+	3.55	0.251	1
purine-containing compound catabolic process (GO:0072523)	39	1	0.28	+	3.55	0.251	1
regulation of mononuclear cell proliferation (GO:0032944)	234	6	1.69	+	3.55	0.00785	0.24
regulation of neural precursor cell proliferation (GO:2000177)	117	3	0.85	+	3.55	0.0555	0.652
positive regulation of apoptotic process (GO:0043065)	586	15	4.24	+	3.54	2.98e-05	0.00443
plasma membrane bounded cell projection organization (GO:0120036)	1096	28	7.93	+	3.53	7.69e-09	5.06e-06
apoptotic signaling pathway (GO:0097190)	274	7	1.98	+	3.53	0.00427	0.166
enzyme linked receptor protein signaling pathway (GO:0007167)	549	14	3.97	+	3.53	5.76e-05	0.0071
synaptic signaling (GO:0099536)	393	10	2.84	+	3.52	0.000687	0.0477
negative regulation of protein metabolic process (GO:0051248)	1062	27	7.68	+	3.52	1.64e-08	8.9e-06
positive regulation of programmed cell death (GO:0043068)	591	15	4.27	+	3.51	3.27e-05	0.00474
central nervous system development (GO:0007417)	868	22	6.28	+	3.51	4.27e-07	0.000118
regulation of lipase activity (GO:0060191)	79	2	0.57	+	3.5	0.115	0.915
response to retinoic acid (GO:0032526)	79	2	0.57	+	3.5	0.115	0.915
cellular response to acid chemical (GO:0071229)	79	2	0.57	+	3.5	0.115	0.914
negative regulation of protein ubiquitination (GO:0031397)	79	2	0.57	+	3.5	0.115	0.914
cytokine-mediated signaling pathway (GO:0019221)	277	7	2	+	3.49	0.00452	0.169
hemopoiesis (GO:0030097)	674	17	4.87	+	3.49	1.03e-05	0.00196
cellular response to biotic stimulus (GO:0071216)	238	6	1.72	+	3.49	0.00848	0.254
regulation of response to cytokine stimulus (GO:0060759)	119	3	0.86	+	3.49	0.0578	0.642
cell projection organization (GO:0030030)	1152	29	8.33	+	3.48	5.48e-09	4.33e-06
male sex differentiation (GO:0046661)	159	4	1.15	+	3.48	0.0301	0.483
regulation of endothelial cell differentiation (GO:0045601)	40	1	0.29	+	3.46	0.256	1
regulation of neuroblast proliferation (GO:1902692)	40	1	0.29	+	3.46	0.256	1
positive regulation of cation channel activity (GO:2001259)	80	2	0.58	+	3.46	0.117	0.913
regulation of feeding behavior (GO:0060259)	40	1	0.29	+	3.46	0.256	1
one-carbon metabolic process (GO:0006730)	40	1	0.29	+	3.46	0.256	1
canonical Wnt signaling pathway (GO:0060070)	80	2	0.58	+	3.46	0.117	0.913
positive regulation of synapse assembly (GO:0051965)	80	2	0.58	+	3.46	0.117	0.912
positive regulation of ATPase activity (GO:0032781)	40	1	0.29	+	3.46	0.256	1
protein dephosphorylation (GO:0006470)	160	4	1.16	+	3.46	0.0307	0.485
positive regulation of signaling receptor activity (GO:2000273)	40	1	0.29	+	3.46	0.256	1
neurotransmitter receptor transport (GO:0099637)	40	1	0.29	+	3.46	0.256	1
release of sequestered calcium ion into cytosol (GO:0051209)	40	1	0.29	+	3.46	0.256	1
positive regulation of calcium ion transmembrane transporter activity (GO:1901021)	40	1	0.29	+	3.46	0.256	1
regulation of purine nucleotide metabolic process (GO:1900542)	80	2	0.58	+	3.46	0.117	0.912
regulation of protein import (GO:1904589)	80	2	0.58	+	3.46	0.117	0.911
gene silencing by miRNA (GO:0035195)	40	1	0.29	+	3.46	0.256	1
regulation of insulin secretion involved in cellular response to glucose stimulus (GO:0061178)	80	2	0.58	+	3.46	0.117	0.911
long-term memory (GO:0007616)	40	1	0.29	+	3.46	0.256	1
negative regulation of neuron projection development (GO:0010977)	161	4	1.16	+	3.44	0.0313	0.493
cellular response to external stimulus (GO:0071496)	242	6	1.75	+	3.43	0.00915	0.266
locomotory behavior (GO:0007626)	242	6	1.75	+	3.43	0.00915	0.266
chemotaxis (GO:0006935)	486	12	3.51	+	3.41	0.000263	0.023
granulocyte chemotaxis (GO:0071621)	81	2	0.59	+	3.41	0.12	0.927
regulation of mitochondrial membrane potential (GO:0051881)	81	2	0.59	+	3.41	0.12	0.927
regulation of nucleotide metabolic process (GO:0006140)	81	2	0.59	+	3.41	0.12	0.926
branching morphogenesis of an epithelial tube (GO:0048754)	162	4	1.17	+	3.41	0.0319	0.497
positive regulation of neuron apoptotic process (GO:0043525)	81	2	0.59	+	3.41	0.12	0.926
response to amino acid (GO:0043200)	81	2	0.59	+	3.41	0.12	0.926
phospholipid transport (GO:0015914)	81	2	0.59	+	3.41	0.12	0.925
regulation of cellular pH (GO:0030641)	81	2	0.59	+	3.41	0.12	0.925
epithelial cell migration (GO:0010631)	81	2	0.59	+	3.41	0.12	0.924
glycosaminoglycan metabolic process (GO:0030203)	81	2	0.59	+	3.41	0.12	0.924
gliogenesis (GO:0042063)	243	6	1.76	+	3.41	0.00932	0.268
cellular response to lipopolysaccharide (GO:0071222)	203	5	1.47	+	3.41	0.0173	0.372
adenylate cyclase-modulating G protein-coupled receptor signaling pathway (GO:0007188)	204	5	1.48	+	3.39	0.0176	0.379
regulation of cell development (GO:0060284)	572	14	4.14	+	3.38	8.82e-05	0.01
negative regulation of response to external stimulus (GO:0032102)	368	9	2.66	+	3.38	0.00165	0.0913
taxis (GO:0042330)	491	12	3.55	+	3.38	0.000288	0.0239
positive regulation of peptide hormone secretion (GO:0090277)	123	3	0.89	+	3.37	0.0624	0.684
[truncated: 13,784 more rows]
