# Supplementary material for: Single-cell analysis of the ventricular-subventricular zone reveals signatures of dorsal and ventral adult neurogenesis
Source: eLife. 2021 Jul 14;10:e67436. doi: 10.7554/eLife.67436 (PMC8443251; doi:10.7554/eLife.67436)
Supplement: Supplementary file 4. [file elife-67436-supp4.xlsx]

## Sheet: Sheet1
p_val	avg_logFC	pct.1	pct.2	p_val_adj	cluster	gene
0	1.2976	0.911	0.425	0	0	Synpr
0	1.16293	0.748	0.214	0	0	Pax6
6.78135e-306	0.699585	0.949	0.614	1.74979e-301	0	Sp8
2.72267e-238	0.649612	0.996	0.823	7.0253e-234	0	Robo2
2.12876e-235	0.793763	0.647	0.25	5.49285e-231	0	Parm1
2.56178e-224	0.420974	0.412	0.088	6.61017e-220	0	Rlbp1
4.52705e-216	0.434174	1	0.996	1.16811e-211	0	Meis2
3.03357e-213	0.362826	1	1	7.82752e-209	0	Tcf4
1.49657e-209	0.604287	0.904	0.624	3.86161e-205	0	Sdk2
2.86019e-205	0.801873	0.818	0.521	7.38016e-201	0	Adgrb3
1.57796e-201	0.601724	0.539	0.185	4.0716e-197	0	Dab1
3.72813e-196	0.648891	0.876	0.61	9.61968e-192	0	Spon1
3.27378e-181	0.602544	0.963	0.852	8.44732e-177	0	Gm17750
6.83777e-181	0.665336	0.867	0.628	1.76435e-176	0	Gria2
2.62806e-167	0.359859	0.998	0.992	6.78118e-163	0	Igfbpl1
5.1709e-164	0.597476	0.876	0.612	1.33425e-159	0	Grip1
4.57097e-154	0.569994	0.886	0.66	1.17945e-149	0	Edil3
4.04991e-149	0.507463	0.606	0.285	1.045e-144	0	Tnik
8.22557e-138	0.35928	0.999	0.945	2.12244e-133	0	Stmn2
3.85865e-126	0.594604	0.936	0.889	9.95647e-122	0	Nrxn1
3.23842e-124	0.444718	0.951	0.889	8.3561e-120	0	Nlk
4.15636e-121	0.278375	1	1	1.07247e-116	0	Nfib
3.94014e-117	0.301185	1	0.994	1.01667e-112	0	Ccdc88a
9.65574e-117	0.293501	1	1	2.49147e-112	0	Malat1
8.88476e-116	0.29212	1	0.999	2.29253e-111	0	Auts2
2.55909e-115	0.506569	0.938	0.769	6.60322e-111	0	Cadm2
2.58708e-114	0.412761	0.957	0.88	6.67544e-110	0	Slc15a2
4.16458e-111	0.341357	0.982	0.946	1.07459e-106	0	C130071C03Rik
1.85102e-109	0.561382	0.507	0.245	4.77618e-105	0	Zfp385b
3.7497e-109	0.693431	0.697	0.442	9.67535e-105	0	Fgf14
2.07781e-98	0.467214	0.818	0.67	5.36138e-94	0	Cttnbp2
2.68935e-94	0.347268	0.895	0.75	6.93933e-90	0	Fam110b
1.09623e-93	0.32771	0.999	0.895	2.8286e-89	0	Nav3
1.26589e-92	0.367199	0.689	0.438	3.26638e-88	0	Igsf11
2.70754e-88	0.294679	0.994	0.966	6.98626e-84	0	Gm4258
5.39343e-88	0.332393	0.438	0.208	1.39167e-83	0	Glrb
7.30487e-86	0.398559	0.53	0.297	1.88488e-81	0	Nr2f1
2.62783e-82	0.529134	0.292	0.109	6.7806e-78	0	Kcnd3
6.198e-82	0.290718	0.967	0.924	1.59927e-77	0	Gm3764
1.89611e-81	0.654897	0.704	0.499	4.89254e-77	0	Nlgn1
5.24214e-80	0.323659	0.965	0.882	1.35263e-75	0	Gad2
8.94719e-78	0.307943	0.977	0.94	2.30864e-73	0	Ank2
6.82351e-74	0.511778	0.389	0.189	1.76067e-69	0	Fam65b
1.09264e-71	0.462171	0.44	0.24	2.81934e-67	0	Slc1a3
1.31458e-70	0.350271	0.863	0.752	3.39201e-66	0	Chd3
9.16227e-69	0.360051	0.865	0.731	2.36414e-64	0	Hdac9
1.24319e-66	0.372811	0.857	0.714	3.20781e-62	0	Tmtc2
3.19496e-66	0.311468	0.863	0.756	8.24395e-62	0	Ccdc50
1.79337e-64	0.289837	0.905	0.776	4.62744e-60	0	Gad1
1.91237e-63	0.252611	0.971	0.938	4.93448e-59	0	Bcl11a
5.97454e-62	0.318254	0.702	0.523	1.54161e-57	0	Tle1
5.0213e-60	0.316787	0.119	0.024	1.29564e-55	0	Trhde
4.04881e-58	0.290475	0.677	0.48	1.04471e-53	0	Nmnat2
4.44024e-57	0.268785	0.604	0.404	1.14572e-52	0	Fam78b
1.06565e-56	0.374295	0.581	0.388	2.74969e-52	0	Sema6d
2.43333e-56	0.381968	0.804	0.662	6.27872e-52	0	March1
3.05351e-56	0.265321	0.442	0.253	7.87898e-52	0	Epb41l3
6.99379e-55	0.257649	0.952	0.888	1.80461e-50	0	Cadps
1.33104e-54	0.537016	0.576	0.386	3.43448e-50	0	Kirrel3
2.22104e-53	0.280776	0.804	0.623	5.73096e-49	0	Ppfia2
3.22729e-52	0.328291	0.566	0.389	8.32737e-48	0	Pik3r1
5.70169e-52	0.552989	0.5	0.321	1.47121e-47	0	Ncam2
7.30828e-52	0.292092	0.932	0.868	1.88576e-47	0	Cited2
4.53751e-49	0.359444	0.588	0.424	1.17081e-44	0	Grin2b
8.2545e-47	0.334232	0.825	0.674	2.12991e-42	0	Il1rapl1
1.4484e-46	0.289909	0.819	0.66	3.73731e-42	0	Sorbs2
1.6333e-46	0.373365	0.788	0.64	4.21439e-42	0	Meg3
4.43619e-46	0.284987	0.627	0.47	1.14467e-41	0	Fam171b
3.02074e-45	0.356712	0.486	0.325	7.79443e-41	0	E130114P18Rik
6.08382e-45	0.729188	0.573	0.422	1.56981e-40	0	Dcc
1.90856e-42	0.286877	0.137	0.044	4.92466e-38	0	Brinp3
6.14351e-42	0.26828	0.852	0.743	1.58521e-37	0	Dmd
1.84009e-39	0.335842	0.298	0.163	4.74798e-35	0	Dscam
1.02556e-34	0.291129	0.597	0.46	2.64625e-30	0	Ube2e2
1.33832e-33	0.255646	0.838	0.758	3.45327e-29	0	1810026B05Rik
1.07246e-32	0.315237	0.449	0.308	2.76727e-28	0	Brinp1
5.23568e-31	0.261084	0.871	0.79	1.35096e-26	0	Cacna1c
1.50106e-30	0.331374	0.474	0.334	3.87318e-26	0	Lrrtm4
1.71927e-29	0.412758	0.54	0.419	4.43623e-25	0	Trpc4
1.52376e-28	0.564523	0.481	0.377	3.93175e-24	0	Eml5
3.99645e-27	0.264047	0.483	0.355	1.0312e-22	0	Pde1c
3.18128e-22	0.266396	0.408	0.288	8.20867e-18	0	Rbfox1
7.19317e-15	0.341237	0.701	0.675	1.85605e-10	0	Sox6
0	1.61497	0.982	0.539	0	1	Pbx3
0	1.45811	0.858	0.371	0	1	Foxp2
0	1.32551	0.996	0.744	0	1	Adarb2
0	1.21564	0.886	0.306	0	1	Tenm4
0	1.10978	0.653	0.194	0	1	Luzp2
0	1.07903	0.968	0.501	0	1	Plxna4
0	0.959699	0.77	0.283	0	1	Runx1t1
0	0.917494	0.967	0.642	0	1	Erbb4
0	0.748523	1	0.983	0	1	Pcdh9
0	0.649143	1	0.961	0	1	Magi2
0	0.570382	1	0.997	0	1	Pbx1
4.31632e-305	0.861991	0.609	0.17	1.11374e-300	1	Tshz2
1.45914e-301	0.718762	0.966	0.67	3.76501e-297	1	Shtn1
3.91975e-296	0.737477	0.996	0.743	1.01141e-291	1	Lrrc7
2.92878e-283	0.88667	0.928	0.637	7.55714e-279	1	Tenm2
1.27203e-282	1.03292	0.609	0.176	3.28222e-278	1	Nxph1
3.77926e-262	0.599657	0.537	0.143	9.75164e-258	1	C79798
1.48793e-256	0.69332	0.931	0.626	3.8393e-252	1	Sorbs2
5.96658e-250	0.609087	0.712	0.293	1.53956e-245	1	Grik3
1.81405e-236	0.554311	0.996	0.916	4.68079e-232	1	Zfp704
1.08444e-235	0.778695	0.909	0.603	2.79818e-231	1	Meg3
7.57662e-232	0.597321	0.977	0.757	1.95499e-227	1	Cacna1c
7.75277e-231	0.753057	0.794	0.461	2.00045e-226	1	Tshz1
1.11416e-221	0.571576	0.95	0.74	2.87487e-217	1	Pde4dip
7.34345e-217	0.434085	1	0.998	1.89483e-212	1	Sox4
4.5655e-208	0.687031	0.582	0.215	1.17804e-203	1	Slc4a4
1.98602e-207	0.423644	0.384	0.08	5.12453e-203	1	B3gat1
6.98267e-202	0.731097	0.82	0.495	1.80174e-197	1	Xkr4
2.13503e-197	0.476673	1	0.896	5.50902e-193	1	Nav3
8.56288e-197	0.669478	0.275	0.035	2.20948e-192	1	Ntng1
3.07205e-188	0.780613	0.541	0.197	7.9268e-184	1	Dpp10
9.28695e-184	0.519932	0.979	0.878	2.39631e-179	1	Zswim6
3.79901e-183	0.739335	0.674	0.334	9.80259e-179	1	Rims1
1.23654e-181	0.73643	0.96	0.9	3.19065e-177	1	Mpped2
1.2624e-179	0.763095	0.501	0.172	3.25738e-175	1	Gm26871
3.27857e-170	0.279305	0.205	0.017	8.4597e-166	1	Gm27032
3.24935e-167	0.500894	0.831	0.57	8.38429e-163	1	Mtss1
1.78496e-163	0.404845	1	0.996	4.60574e-159	1	Sox2ot
2.52575e-161	0.643943	0.559	0.234	6.51719e-157	1	St6galnac5
1.26662e-157	0.520609	0.907	0.748	3.26825e-153	1	Frmd4b
4.85428e-157	0.560828	0.87	0.645	1.25255e-152	1	Mapk10
2.24835e-156	0.630858	0.608	0.308	5.80142e-152	1	Prkca
6.15971e-155	0.467695	0.94	0.708	1.58939e-150	1	Myt1l
4.10021e-147	0.498655	0.75	0.443	1.05798e-142	1	Elmo1
9.39471e-142	0.533438	0.896	0.669	2.42412e-137	1	Flrt2
1.1557e-141	0.616795	0.397	0.134	2.98205e-137	1	Ptprm
4.04821e-139	0.605936	0.813	0.555	1.04456e-134	1	Fam155a
3.79728e-135	0.461591	0.328	0.09	9.79811e-131	1	Sema5a
6.80261e-132	0.313441	0.259	0.053	1.75528e-127	1	Gm26883
3.67101e-129	0.33787	0.998	0.975	9.47231e-125	1	Btg1
5.01112e-129	0.790502	0.595	0.292	1.29302e-124	1	Ncam2
9.40442e-128	0.408731	0.987	0.909	2.42662e-123	1	Ctnnd2
1.42973e-125	0.373277	0.99	0.917	3.68913e-121	1	Celf4
8.8368e-124	0.490773	0.875	0.615	2.28016e-119	1	Grip1
4.16006e-122	0.409976	0.927	0.813	1.07342e-117	1	Gm26735
6.71172e-122	0.358818	0.353	0.112	1.73183e-117	1	Ubash3b
3.31094e-121	0.551638	0.774	0.539	8.54323e-117	1	Sntg1
2.25241e-120	0.420342	0.957	0.863	5.8119e-116	1	Maml3
3.31942e-120	0.500308	0.62	0.356	8.56509e-116	1	Plcb4
1.67103e-115	0.462387	0.84	0.613	4.31176e-111	1	Ppfia2
7.59058e-114	0.367322	0.993	0.934	1.9586e-109	1	Enox1
8.4436e-112	0.537452	0.863	0.663	2.1787e-107	1	Il1rapl1
5.1721e-111	0.259695	1	1	1.33456e-106	1	Nfib
5.47157e-109	0.835821	0.651	0.431	1.41183e-104	1	Ccser1
1.52584e-108	0.428042	0.772	0.593	3.93713e-104	1	Fgfr2
1.93337e-108	0.381569	0.875	0.707	4.98866e-104	1	Plxna2
3.8404e-106	0.429685	0.552	0.279	9.90937e-102	1	Erc2
1.01174e-104	0.482818	0.939	0.77	2.61058e-100	1	Cadm2
1.50683e-104	0.272731	1	0.981	3.88807e-100	1	Map1b
2.42995e-103	0.401667	0.302	0.097	6.27001e-99	1	Rbms1
8.11239e-102	0.408418	0.757	0.561	2.09324e-97	1	Pdcd4
5.7129e-99	0.536394	0.808	0.627	1.4741e-94	1	Fgf13
9.71545e-99	0.350822	0.934	0.866	2.50688e-94	1	Asap1
1.22459e-98	0.394665	0.485	0.225	3.15981e-94	1	B020031H02Rik
2.79867e-95	0.483099	0.424	0.191	7.22141e-91	1	Syn3
3.31405e-95	0.275458	1	0.996	8.55124e-91	1	Meis2
2.48988e-93	0.401337	0.804	0.625	6.42464e-89	1	Tanc2
4.1496e-93	0.366909	0.812	0.671	1.07072e-88	1	Thra
9.99747e-92	0.479977	0.763	0.576	2.57965e-87	1	Vcan
5.26107e-91	0.380867	0.515	0.273	1.35751e-86	1	Cers6
1.5484e-89	0.32437	0.44	0.2	3.99535e-85	1	Gm45680
2.38884e-89	0.307325	0.974	0.91	6.16393e-85	1	Khdrbs3
3.21762e-87	0.467256	0.295	0.108	8.30244e-83	1	Ntm
2.75284e-86	0.552269	0.402	0.189	7.10315e-82	1	Cntnap2
9.3494e-86	0.316364	0.438	0.208	2.41243e-81	1	Slco5a1
1.74119e-85	0.385587	0.8	0.603	4.49279e-81	1	Tmem178b
4.84804e-85	0.263736	0.18	0.039	1.25094e-80	1	Dchs2
2.07573e-84	0.334826	0.922	0.828	5.35601e-80	1	Srgap2
6.90837e-84	0.371298	0.609	0.377	1.78257e-79	1	Peli2
3.13023e-83	0.349352	0.82	0.646	8.07694e-79	1	Ppp1r12b
6.97029e-83	0.365429	0.679	0.468	1.79854e-78	1	Sptbn1
7.04954e-82	0.274334	1	0.997	1.81899e-77	1	Ctnna2
1.17951e-80	0.256617	0.201	0.052	3.04349e-76	1	Prokr2
3.00316e-80	0.313459	0.482	0.247	7.74905e-76	1	Slit1
3.88918e-80	0.336585	0.501	0.264	1.00353e-75	1	Cacnb4
6.42239e-79	0.392913	0.701	0.483	1.65717e-74	1	Wls
1.59049e-78	0.461188	0.678	0.451	4.10395e-74	1	Fgf14
2.01664e-78	0.347594	0.835	0.664	5.20353e-74	1	Pak7
1.35752e-77	0.333679	0.357	0.155	3.5028e-73	1	Csrnp3
2.33388e-77	0.312868	0.919	0.859	6.0221e-73	1	Kalrn
2.45115e-75	0.29143	0.926	0.838	6.32471e-71	1	Nrep
2.87668e-75	0.319981	0.509	0.276	7.42269e-71	1	Rian
4.84672e-75	0.304176	0.396	0.187	1.2506e-70	1	Lurap1l
9.19477e-75	0.450596	0.267	0.097	2.37253e-70	1	Ptprt
4.18966e-74	0.345762	0.692	0.489	1.08106e-69	1	Asxl3
2.41944e-73	0.331803	0.855	0.725	6.24287e-69	1	Bach2
3.14344e-72	0.348721	0.858	0.751	8.11102e-68	1	Aff3
1.27001e-71	0.363319	0.235	0.078	3.27701e-67	1	Gm20754
1.68825e-70	0.472732	0.595	0.377	4.35619e-66	1	Csmd3
1.01117e-69	0.303858	0.337	0.149	2.60911e-65	1	Adcy2
1.67031e-69	0.270089	0.999	0.95	4.3099e-65	1	Anks1b
5.53302e-69	0.278297	0.954	0.858	1.42768e-64	1	Tubb2a
1.01766e-67	0.312105	0.878	0.792	2.62587e-63	1	2610203C20Rik
4.25425e-67	0.3514	0.594	0.384	1.09772e-62	1	Kcnh8
8.10018e-67	0.312365	0.531	0.331	2.09009e-62	1	Mn1
2.75374e-65	0.257737	0.943	0.881	7.10547e-61	1	Nedd4l
6.66512e-65	0.251013	0.238	0.084	1.7198e-60	1	Kcnip1
7.22423e-64	0.334479	0.613	0.421	1.86407e-59	1	Snhg14
2.27304e-62	0.261865	0.922	0.883	5.86513e-58	1	Tcaf1
3.19745e-62	0.348277	0.832	0.732	8.25038e-58	1	Gabrb3
5.35561e-61	0.327678	0.951	0.921	1.38191e-56	1	Zeb1
6.04865e-61	0.308063	0.188	0.057	1.56073e-56	1	Hcn1
7.61054e-60	0.400207	0.276	0.12	1.96375e-55	1	Pde4b
1.17945e-58	0.32	0.586	0.379	3.04335e-54	1	Hecw1
2.56128e-58	0.256086	0.372	0.194	6.60886e-54	1	Plekha1
5.10078e-58	0.342162	0.324	0.153	1.31616e-53	1	Nkain3
4.17233e-57	0.272268	0.938	0.876	1.07659e-52	1	Pde4d
3.79225e-56	0.371652	0.37	0.194	9.78513e-52	1	Kcnj3
4.35929e-56	0.285435	0.939	0.901	1.12483e-51	1	Cdk14
5.25815e-56	0.302018	0.955	0.838	1.35676e-51	1	Robo2
6.32646e-56	0.378877	0.645	0.478	1.63242e-51	1	March3
1.04741e-55	0.343294	0.779	0.662	2.70264e-51	1	Kcnn2
1.24198e-55	0.273922	0.842	0.75	3.20467e-51	1	Tnrc6b
9.71638e-55	0.320603	0.743	0.584	2.50712e-50	1	Hist3h2ba
4.50335e-54	0.375895	0.438	0.264	1.162e-49	1	Adgrl3
8.85119e-54	0.268094	0.972	0.949	2.28387e-49	1	2610307P16Rik
7.26043e-52	0.300277	0.739	0.596	1.87341e-47	1	St6galnac3
4.38526e-50	0.253104	0.208	0.079	1.13153e-45	1	Itgbl1
7.19156e-49	0.297431	0.532	0.364	1.85564e-44	1	Nrcam
9.8047e-49	0.282979	0.432	0.254	2.52991e-44	1	Scn3a
1.06731e-48	0.266147	0.566	0.4	2.75399e-44	1	Slc6a1
1.15642e-47	0.251134	0.885	0.826	2.98392e-43	1	C530008M17Rik
1.85291e-46	0.311671	0.699	0.546	4.78106e-42	1	Snrpn
3.30562e-46	0.296632	0.902	0.82	8.52948e-42	1	Dlgap1
3.01845e-45	0.253248	0.591	0.428	7.7885e-41	1	Trafd1
2.82627e-44	0.328925	0.568	0.396	7.29263e-40	1	Ank3
1.03167e-43	0.330789	0.631	0.475	2.66202e-39	1	Rora
3.12767e-43	0.280807	0.616	0.49	8.07033e-39	1	Fam168a
2.48079e-42	0.289928	0.536	0.382	6.40118e-38	1	D430041D05Rik
2.58702e-42	0.263313	0.825	0.746	6.67529e-38	1	Hdac9
3.18891e-42	0.274963	0.851	0.751	8.22835e-38	1	Slc8a1
6.60486e-42	0.274611	0.573	0.389	1.70425e-37	1	Kirrel3
5.63055e-41	0.368066	0.614	0.492	1.45285e-36	1	Slc35f1
1.11813e-40	0.267924	0.768	0.648	2.88512e-36	1	Gng3
1.5624e-39	0.35812	0.298	0.168	4.03146e-35	1	Lrrc4c
1.6093e-38	0.306318	0.578	0.444	4.15248e-34	1	Gpr137c
2.04951e-37	0.279363	0.617	0.454	5.28836e-33	1	Gria4
3.02428e-37	0.259153	0.797	0.708	7.80356e-33	1	Etv1
3.62627e-36	0.25825	0.54	0.405	9.35687e-32	1	Mgat5
3.68568e-36	0.342196	0.66	0.543	9.51017e-32	1	5730522E02Rik
9.31527e-36	0.259086	0.288	0.157	2.40362e-31	1	Sorcs3
1.63451e-32	0.253487	0.757	0.687	4.21753e-28	1	Sobp
3.77936e-32	0.274727	0.28	0.158	9.75188e-28	1	Lrrtm3
6.02318e-31	0.32974	0.384	0.251	1.55416e-26	1	Syt1
9.77536e-31	0.282243	0.578	0.458	2.52234e-26	1	Tmem2
3.30761e-30	0.293121	0.36	0.239	8.53463e-26	1	Dlg2.1
2.92026e-29	0.311453	0.374	0.244	7.53513e-25	1	Fbxl7
1.84074e-28	0.298399	0.701	0.624	4.74965e-24	1	Macrod2
1.60532e-26	0.297022	0.44	0.317	4.14222e-22	1	Thsd7a
1.4332e-24	0.328749	0.31	0.202	3.69809e-20	1	Slit2
2.0488e-23	0.25792	0.348	0.243	5.28651e-19	1	Zfhx3
1.10814e-19	0.273503	0.37	0.265	2.85934e-15	1	Kcnd2
7.04849e-18	0.474767	0.219	0.14	1.81872e-13	1	Cntn5
7.40456e-17	0.253712	0.298	0.208	1.9106e-12	1	Dach2
1.14531e-08	0.255435	0.171	0.122	0.000295525	1	Unc5c
7.32617e-06	0.285379	0.457	0.445	0.189037	1	Tmod3
5.02017e-151	0.402085	1	0.951	1.29535e-146	4	Anks1b
1.93326e-121	0.44614	0.958	0.865	4.98839e-117	4	Nbea
1.1388e-108	0.341449	1	0.996	2.93845e-104	4	Sox2ot
1.52179e-86	0.349398	0.515	0.263	3.92668e-82	4	Neb
9.23706e-82	0.639925	0.491	0.253	2.38344e-77	4	Unc5d
1.52805e-80	0.325504	0.94	0.806	3.94283e-76	4	Gm38505
1.0795e-73	0.540176	0.892	0.673	2.78542e-69	4	Erbb4
9.58793e-72	0.327125	0.913	0.693	2.47397e-67	4	Shtn1
1.67844e-68	0.367621	0.258	0.093	4.33087e-64	4	Pdzrn3
4.35865e-60	0.556419	0.647	0.449	1.12466e-55	4	Gria4
7.04354e-60	0.2894	0.964	0.895	1.81744e-55	4	Cdk14
8.83786e-59	0.35134	0.849	0.698	2.28043e-54	4	Sox5
2.48352e-57	0.387629	0.379	0.194	6.40822e-53	4	Fstl5
2.59304e-57	0.309634	0.375	0.188	6.69083e-53	4	Dach2
1.58173e-52	0.286439	0.814	0.631	4.08135e-48	4	Gm5607
4.86014e-52	0.324846	0.607	0.4	1.25406e-47	4	Robo1
1.3358e-51	0.430026	0.755	0.602	3.44675e-47	4	Nrg1
1.43762e-39	0.303539	0.612	0.462	3.70949e-35	4	S100a10
3.32665e-38	0.25516	0.734	0.578	8.58377e-34	4	Pip5k1b
1.3622e-36	0.408562	0.434	0.285	3.51489e-32	4	Rbfox1
2.9146e-36	0.299596	0.886	0.803	7.52054e-32	4	Grik2
5.29597e-31	0.317604	0.592	0.449	1.36652e-26	4	Zfhx4
1.37643e-24	0.320639	0.589	0.474	3.55161e-20	4	Ptprd
2.38647e-20	0.336109	0.357	0.253	6.15782e-16	4	Mdga2
4.24191e-05	0.25688	0.106	0.075	1	4	Nrg3
1.81394e-298	0.86815	0.999	0.999	4.6805e-294	6	Tmsb4x
6.61335e-242	0.835473	0.954	0.718	1.70644e-237	6	Vim
1.07267e-207	0.511648	1	0.995	2.7678e-203	6	Ccnd2
2.24129e-171	0.500156	0.996	0.941	5.78319e-167	6	Sem1
2.60877e-162	0.687408	0.934	0.689	6.7314e-158	6	Sox5
1.08845e-160	0.394338	0.999	0.989	2.80852e-156	6	H2afz
5.51233e-138	0.650505	0.848	0.559	1.42235e-133	6	St18
3.00145e-137	0.506683	0.973	0.875	7.74463e-133	6	Dclk2
4.45008e-135	0.367162	0.999	0.992	1.14826e-130	6	Hmgn2
1.52037e-129	0.500507	0.849	0.516	3.92301e-125	6	Mdk
1.62053e-127	0.450107	0.537	0.211	4.18146e-123	6	Slc25a13
1.76162e-118	0.401502	0.901	0.632	4.5455e-114	6	Slc25a5
4.59251e-116	0.974821	0.5	0.216	1.18501e-111	6	Sorcs1
3.99417e-99	0.264246	0.999	0.994	1.03062e-94	6	Eif4a1
1.83759e-97	0.381096	0.703	0.387	4.74154e-93	6	Insm1
3.12812e-97	0.484883	0.881	0.694	8.0715e-93	6	Dlx1as
6.22107e-97	0.392861	0.779	0.496	1.60522e-92	6	Ola1
8.9454e-95	0.266521	1	1	2.30818e-90	6	Actb
9.91897e-92	0.37595	0.992	0.952	2.55939e-87	6	Sp9
6.14566e-90	0.350375	0.69	0.384	1.58576e-85	6	Clic1
4.89093e-89	0.360916	0.874	0.612	1.26201e-84	6	Ezr
2.50917e-88	0.304207	0.996	0.966	6.47441e-84	6	H2afv
1.44494e-87	0.283088	0.999	0.995	3.72838e-83	6	Ubc
1.92641e-87	0.451385	0.896	0.702	4.97071e-83	6	Prox1
5.9038e-86	0.384992	0.786	0.522	1.52336e-81	6	Dcbld1
1.40056e-84	0.285488	0.99	0.917	3.61387e-80	6	Cdk4
4.72606e-84	0.376589	0.756	0.495	1.21947e-79	6	Cyp51
7.28535e-77	0.392051	0.589	0.318	1.87984e-72	6	Msmo1
1.41688e-72	0.309712	0.722	0.483	3.65597e-68	6	Ufm1
1.82596e-72	0.259927	0.375	0.154	4.71153e-68	6	Cpeb2
7.57789e-72	0.280854	0.875	0.629	1.95532e-67	6	RP23-48A24.3
3.93172e-71	0.312578	0.495	0.253	1.0145e-66	6	Arrdc4
2.65447e-68	0.306181	0.824	0.593	6.84933e-64	6	Taldo1
7.56228e-68	0.309159	0.546	0.291	1.95129e-63	6	Idi1
2.23687e-67	0.261255	0.983	0.939	5.77178e-63	6	Atp5b
7.51003e-67	0.276296	0.76	0.484	1.93781e-62	6	Cycs
1.02035e-66	0.40058	0.766	0.535	2.63282e-62	6	Hmgcs1
5.8174e-65	0.325081	0.722	0.496	1.50106e-60	6	Fdft1
8.31933e-64	0.254751	0.94	0.793	2.14664e-59	6	Cox5a
1.10308e-63	0.287119	0.675	0.424	2.84627e-59	6	Akirin1
4.63528e-63	0.296231	0.471	0.24	1.19604e-58	6	Rbm24
1.13387e-62	0.262529	0.993	0.967	2.92572e-58	6	Cd24a
4.37231e-62	0.276615	0.885	0.696	1.12819e-57	6	Chic2
4.86653e-62	0.334799	0.687	0.451	1.25571e-57	6	Hmgcr
1.23665e-61	0.290404	0.882	0.688	3.19093e-57	6	Rpl13a
3.53989e-60	0.294338	0.611	0.368	9.13398e-56	6	Sqle
2.10115e-59	0.446864	0.471	0.252	5.4216e-55	6	Pid1
4.5932e-59	0.278833	0.514	0.283	1.18518e-54	6	Myo1b
2.00337e-57	0.263965	0.601	0.367	5.16931e-53	6	Ube2ql1
2.97681e-57	0.367047	0.79	0.576	7.68106e-53	6	Pip5k1b
7.46299e-56	0.30663	0.384	0.182	1.92568e-51	6	Arid5b
1.29323e-53	0.266605	0.958	0.847	3.33691e-49	6	Nudt4
2.81298e-52	0.322694	0.887	0.772	7.25833e-48	6	Dbi
3.79826e-50	0.254451	0.519	0.298	9.80065e-46	6	Insig1
1.51248e-49	0.32073	0.79	0.609	3.90266e-45	6	Gm13889
3.45312e-48	0.338928	0.659	0.443	8.91009e-44	6	Zfhx4
4.15933e-48	0.255724	0.682	0.453	1.07323e-43	6	Dut
8.15388e-46	0.272489	0.549	0.35	2.10395e-41	6	Cdon
6.94621e-44	0.268992	0.807	0.645	1.79233e-39	6	Bcl11b
2.49997e-43	0.253257	0.489	0.287	6.45068e-39	6	Sox9
6.52904e-42	0.256638	0.814	0.651	1.68469e-37	6	Scd2
9.02902e-42	0.269378	0.738	0.552	2.32976e-37	6	Arl4d
2.71478e-41	0.383897	0.605	0.416	7.00495e-37	6	Trpc4
3.14227e-41	0.264503	0.978	0.93	8.108e-37	6	Abracl
3.73397e-40	0.254146	0.638	0.443	9.63476e-36	6	Slc25a12
3.8036e-38	0.253666	0.796	0.621	9.81442e-34	6	Lmo3
5.27024e-38	0.266097	0.829	0.677	1.35988e-33	6	Epha4
6.23585e-38	0.261164	0.882	0.757	1.60904e-33	6	Pten
1.03015e-37	0.251978	0.829	0.692	2.65809e-33	6	Zfp532
8.09388e-35	0.308628	0.503	0.329	2.08846e-30	6	Nhs
4.55079e-34	0.285244	0.533	0.36	1.17424e-29	6	Sel1l3
5.55886e-33	0.251782	0.807	0.675	1.43435e-28	6	Calr
6.4257e-31	0.29661	0.543	0.371	1.65802e-26	6	Igfbp5
3.93082e-30	0.26313	0.419	0.257	1.01427e-25	6	Efna5
5.50836e-23	0.288936	0.233	0.125	1.42132e-18	6	Prm1
0	1.83555	0.874	0.131	0	15	Pclaf
0	1.71593	0.976	0.353	0	15	Hmgb2
0	1.37103	1	0.99	0	15	H2afz
0	1.3332	0.697	0.11	0	15	Rrm2
0	1.20339	0.972	0.525	0	15	Mdk
0	1.19859	0.984	0.561	0	15	Anp32b
0	1.19077	0.859	0.14	0	15	RP23-356P21.1
0	1.15265	0.802	0.191	0	15	Dach1
0	1.08254	0.697	0.111	0	15	Cdk6
0	1.02927	0.912	0.356	0	15	Odc1
0	1.0148	0.629	0.11	0	15	Hells
0	0.959974	0.989	0.747	0	15	Ran
0	0.95833	1	0.968	0	15	H2afv
0	0.950507	1	0.993	0	15	Hmgn2
0	0.920617	0.509	0.06	0	15	Cenpf
0	0.909551	0.811	0.189	0	15	Cks1b
0	0.902672	0.605	0.072	0	15	Uhrf1
0	0.902135	0.61	0.089	0	15	Cdca8
0	0.870989	0.573	0.055	0	15	Birc5
0	0.870689	0.576	0.076	0	15	Top2a
0	0.853211	0.634	0.085	0	15	Mcm3
0	0.847208	1	0.998	0	15	Ptma
0	0.825234	0.592	0.065	0	15	Ung
0	0.811982	0.484	0.045	0	15	Clspn
0	0.800191	0.645	0.1	0	15	Fabp7
0	0.786063	0.551	0.046	0	15	Mki67
0	0.728235	0.512	0.053	0	15	Dtl
0	0.726284	0.638	0.104	0	15	Mcm2
0	0.69732	0.669	0.055	0	15	Cenpm
0	0.634244	0.568	0.046	0	15	Pbk
0	0.579114	0.279	0.007	0	15	Helt
0	0.50247	0.423	0.027	0	15	Ascl1
0	0.416092	0.438	0.037	0	15	Spc24
0	0.380329	0.324	0.014	0	15	Cdc6
1.75955e-305	0.815298	0.676	0.134	4.54017e-301	15	Mcm5
6.40059e-303	0.484126	0.436	0.041	1.65155e-298	15	Gsx2
5.4373e-301	0.331091	0.334	0.017	1.40299e-296	15	Gm15428
5.80857e-299	0.453829	0.402	0.033	1.49878e-294	15	Exo1
7.67684e-294	0.505882	0.477	0.056	1.98085e-289	15	Kcne1l
6.71561e-291	0.503005	0.422	0.041	1.73283e-286	15	Cdk1
7.09456e-286	0.396328	0.343	0.022	1.83061e-281	15	Ccna2
6.1605e-285	1.13888	0.936	0.439	1.58959e-280	15	Dut
3.47236e-282	0.344301	0.29	0.012	8.95974e-278	15	Ccne1
1.9043e-281	1.10123	0.96	0.566	4.91366e-277	15	Dek
2.91412e-278	0.679134	0.46	0.056	7.51932e-274	15	Tpx2
1.33681e-277	0.653935	0.451	0.054	3.44937e-273	15	Zfp367
5.74415e-275	0.401854	0.366	0.029	1.48216e-270	15	Slfn9
1.19906e-274	0.668895	0.586	0.104	3.09392e-270	15	Gmnn
2.77037e-274	1.08109	0.882	0.38	7.14837e-270	15	Hat1
1.54414e-270	0.647681	0.604	0.116	3.98434e-266	15	Mcm4
1.12032e-268	1.09955	0.969	0.603	2.89075e-264	15	Nasp
1.49255e-268	0.385697	0.378	0.033	3.85123e-264	15	Rmi2
1.67757e-268	0.587582	0.562	0.096	4.32862e-264	15	E2f1
1.96863e-264	0.514021	0.479	0.064	5.07964e-260	15	Phgdh
6.84791e-261	0.901508	0.985	0.828	1.76697e-256	15	Ranbp1
7.34396e-258	0.589604	1	0.994	1.89496e-253	15	Hmgn1
1.15247e-255	0.333308	0.322	0.022	2.97371e-251	15	Mcm10
1.58177e-255	0.802009	0.594	0.124	4.08145e-251	15	Dhfr
1.79985e-253	0.709463	0.574	0.111	4.64416e-249	15	Atad2
3.86361e-252	0.908189	0.694	0.185	9.96928e-248	15	Mcm6
5.30495e-252	0.603645	1	0.999	1.36884e-247	15	Rpl41
8.60277e-251	0.85557	0.969	0.636	2.21977e-246	15	RP23-48A24.3
2.23669e-249	0.433219	0.473	0.068	5.77132e-245	15	Cenpw
1.62421e-246	0.383699	0.309	0.021	4.19094e-242	15	Cdca3
2.85138e-245	0.59752	1	0.994	7.35743e-241	15	Ppia
2.44747e-242	0.325247	0.301	0.02	6.31521e-238	15	Ect2
3.10876e-240	0.403231	0.368	0.037	8.02154e-236	15	Knl1
7.49956e-240	0.787723	0.938	0.454	1.93511e-235	15	Gm10282
2.65508e-239	0.867719	0.96	0.645	6.8509e-235	15	Slc25a5
9.85975e-238	0.601689	0.662	0.16	2.54411e-233	15	Hmgn5
9.92132e-238	0.403165	0.347	0.032	2.56e-233	15	Brca1
5.63535e-235	0.274723	0.279	0.017	1.45409e-230	15	Ska1
1.49251e-234	0.471063	0.414	0.053	3.85113e-230	15	Adam23
2.16031e-234	0.571471	0.723	0.202	5.57424e-230	15	Nt5dc2
3.9368e-232	0.708195	0.588	0.135	1.01581e-227	15	Rpa2
4.66215e-232	0.385717	0.287	0.019	1.20297e-227	15	Stk33
2.12462e-229	0.78348	0.924	0.485	5.48216e-225	15	Ppa1
1.248e-228	0.531644	1	0.993	3.22021e-224	15	Sumo2
6.71087e-228	0.378372	0.41	0.052	1.73161e-223	15	Cenpk
2.12512e-225	0.730578	0.713	0.208	5.48346e-221	15	Lockd
4.5853e-225	0.688875	0.999	0.893	1.18314e-220	15	Eif5a
1.30959e-224	0.81322	0.989	0.758	3.37913e-220	15	Hdgf
3.51302e-224	0.811016	0.66	0.189	9.06466e-220	15	Pcna
2.33176e-223	0.534009	0.346	0.036	6.01663e-219	15	Cenpe
1.26976e-222	0.704644	0.695	0.205	3.27637e-218	15	Smc2
3.47895e-221	0.306111	0.274	0.018	8.97675e-217	15	Gjc1
1.58407e-219	0.704426	0.927	0.456	4.08737e-215	15	Anp32e
1.10614e-218	0.536991	0.549	0.116	2.85418e-214	15	Gins2
6.04838e-218	0.605233	0.495	0.091	1.56066e-213	15	Racgap1
3.01886e-217	0.295373	0.282	0.021	7.78956e-213	15	Smco4
3.59555e-216	0.56471	1	0.962	9.2776e-212	15	Hnrnpab
3.65556e-216	0.771593	0.892	0.445	9.43244e-212	15	Dtymk
8.44191e-216	0.836888	0.815	0.352	2.17827e-211	15	Dctpp1
9.89648e-216	0.725061	0.658	0.184	2.55359e-211	15	Mms22l
4.73731e-213	0.942629	0.803	0.3	1.22237e-208	15	Epha3
9.53641e-213	0.253892	0.25	0.014	2.46068e-208	15	Tk1
1.78066e-212	0.442687	0.408	0.058	4.59464e-208	15	Prc1
1.78797e-212	0.351192	0.404	0.056	4.6135e-208	15	Chek1
3.51193e-211	0.343463	0.363	0.044	9.06184e-207	15	Dll3
9.67341e-211	0.628894	0.991	0.805	2.49603e-206	15	Snrpb
1.2656e-210	0.435241	0.342	0.038	3.26563e-206	15	Ckap2l
5.8837e-210	0.310786	0.315	0.03	1.51817e-205	15	Kntc1
9.52758e-209	0.329404	0.251	0.016	2.4584e-204	15	Esco2
3.21427e-208	0.362029	0.398	0.055	8.29378e-204	15	Mad2l1
3.465e-208	0.692892	0.957	0.555	8.94075e-204	15	Alyref
9.89963e-206	0.528403	0.499	0.098	2.5544e-201	15	E2f3
3.47143e-204	0.494374	0.606	0.151	8.95733e-200	15	Rangap1
6.70078e-204	0.29705	0.306	0.029	1.729e-199	15	Kif15
1.34239e-203	0.717143	0.915	0.496	3.46377e-199	15	Rcc2
1.51399e-203	0.438075	0.286	0.025	3.90656e-199	15	Ccnb2
1.40228e-202	0.376381	0.402	0.059	3.6183e-198	15	Nbl1
1.90501e-202	1.18282	0.431	0.077	4.9155e-198	15	Cenpa
2.16478e-202	0.279698	0.258	0.018	5.58579e-198	15	Dlgap5
9.02306e-202	0.349384	0.328	0.036	2.32822e-197	15	Rad51ap1
1.02897e-199	0.497956	1	0.995	2.65506e-195	15	Ybx1
1.18951e-198	0.591259	0.996	0.922	3.06928e-194	15	Cdk4
5.51575e-197	0.663579	0.956	0.617	1.42323e-192	15	Lsm4
1.89158e-196	0.660253	0.497	0.105	4.88084e-192	15	Cks2
1.95649e-196	0.25483	0.273	0.022	5.04833e-192	15	Melk
1.97503e-196	0.883088	0.68	0.21	5.09617e-192	15	Rgs20
8.92862e-196	0.667275	0.963	0.635	2.30385e-191	15	Hmgb1
1.5672e-195	0.504646	0.513	0.111	4.04384e-191	15	Chaf1b
1.61757e-195	0.381253	0.406	0.063	4.17382e-191	15	Rad51
2.62105e-195	0.570215	0.531	0.124	6.76308e-191	15	Fen1
4.53007e-195	0.493544	0.566	0.134	1.16889e-190	15	Baz1a
6.0067e-195	0.76581	0.912	0.538	1.54991e-190	15	Gm4204
6.21364e-195	0.688432	0.964	0.676	1.6033e-190	15	Fkbp3
3.20089e-194	0.682859	0.975	0.664	8.25925e-190	15	Tmpo
4.23727e-194	0.381143	0.368	0.051	1.09334e-189	15	Ckap2
5.44981e-194	0.338709	0.32	0.036	1.40622e-189	15	Brip1
1.21763e-193	0.630559	0.725	0.248	3.14185e-189	15	Tipin
1.12863e-192	0.806481	0.63	0.185	2.9122e-188	15	Pttg1
1.6519e-192	0.36205	0.294	0.029	4.26239e-188	15	Sgol2a
4.73447e-192	0.332742	0.352	0.046	1.22164e-187	15	Lrr1
1.35394e-191	0.508356	0.633	0.179	3.49358e-187	15	Ctps
8.8257e-190	0.642549	0.577	0.153	2.2773e-185	15	Tyms
9.01832e-190	0.610235	0.67	0.212	2.327e-185	15	Rrm1
1.04092e-189	0.46104	0.443	0.081	2.68589e-185	15	Knstrn
2.64286e-189	0.668935	0.955	0.609	6.81937e-185	15	Cdk2ap1
1.96287e-188	0.640487	0.682	0.229	5.06478e-184	15	Siva1
5.43757e-188	0.933166	0.983	0.861	1.40306e-183	15	Ckb
3.96148e-186	0.32308	0.344	0.045	1.02218e-181	15	Pole2
1.00099e-184	0.494975	1	0.995	2.58285e-180	15	Rpl8
1.13012e-184	0.411769	0.426	0.076	2.91604e-180	15	Rpa1
1.83255e-184	0.487867	0.674	0.209	4.72853e-180	15	Gm5566
1.85517e-184	0.402055	0.453	0.087	4.78689e-180	15	Gm11914
3.83204e-184	0.382544	0.412	0.07	9.88782e-180	15	Chaf1a
3.96154e-184	0.58056	0.995	0.87	1.0222e-179	15	Srsf2
4.59957e-184	0.45255	0.477	0.098	1.18683e-179	15	Mthfd2
6.07812e-184	0.516523	1	0.958	1.56834e-179	15	Gm8186
2.37072e-183	0.566566	0.996	0.915	6.11718e-179	15	Hmgb3
1.29655e-182	0.661422	0.915	0.5	3.34549e-178	15	Ola1
1.69172e-182	0.436763	0.531	0.122	4.36514e-178	15	Apitd1
2.66784e-182	0.55084	1	0.952	6.88382e-178	15	Set
3.97422e-182	0.468082	0.593	0.156	1.02547e-177	15	Tead2
7.51169e-182	0.554574	0.638	0.194	1.93824e-177	15	Rfc4
1.22531e-181	0.31608	0.298	0.032	3.16166e-177	15	Sema5b
2.53992e-181	0.572209	0.997	0.901	6.55376e-177	15	Hnrnpu
5.74261e-179	0.534396	0.608	0.166	1.48177e-174	15	Sox21
1.20954e-178	0.355499	0.359	0.053	3.12096e-174	15	Wee1
2.29313e-178	0.271593	0.258	0.023	5.91697e-174	15	Eya4
4.00165e-178	0.307168	0.363	0.054	1.03255e-173	15	Homer2
6.24959e-178	0.484587	0.404	0.071	1.61258e-173	15	Diaph3
7.70703e-177	0.594663	0.999	0.951	1.98865e-172	15	Npm1
8.08012e-177	0.441314	0.326	0.043	2.08491e-172	15	Fam64a
4.46891e-176	0.334565	0.352	0.051	1.15311e-171	15	Wdhd1
1.24437e-174	0.669045	0.822	0.387	3.21085e-170	15	Gm10169
1.27103e-174	0.353646	0.403	0.07	3.27964e-170	15	Rdm1
5.47822e-174	0.610952	0.898	0.488	1.41355e-169	15	Cycs
1.53278e-172	0.478723	0.362	0.057	3.95503e-168	15	Nusap1
2.93302e-172	0.521567	0.754	0.28	7.56808e-168	15	Lsm5
1.65659e-171	0.337467	0.352	0.053	4.2745e-167	15	Pole
2.25478e-171	0.414638	0.589	0.161	5.81802e-167	15	Gm9790
5.84278e-171	0.439522	0.999	0.986	1.50761e-166	15	Hint1
1.34444e-170	0.843166	0.693	0.236	3.46905e-166	15	Gm29260
2.2171e-169	0.460657	1	0.994	5.72078e-165	15	Rplp1
2.83779e-169	0.455154	1	0.994	7.32235e-165	15	Eif4a1
8.45496e-167	0.323242	0.356	0.056	2.18163e-162	15	Lhx2
1.13362e-166	0.624203	0.759	0.321	2.92508e-162	15	Mif
1.59367e-166	0.639196	0.952	0.709	4.11214e-162	15	Lmnb1
2.08339e-166	0.281698	0.305	0.039	5.37577e-162	15	Cit
1.83147e-165	0.575373	0.564	0.155	4.72575e-161	15	Kitl
5.34907e-165	0.449383	0.465	0.104	1.38022e-160	15	Cenph
6.40493e-165	0.313591	0.327	0.047	1.65266e-160	15	Nde1
4.42496e-164	0.301514	0.326	0.047	1.14177e-159	15	Pcna-ps2
4.75948e-164	0.459598	1	0.988	1.22809e-159	15	Gm10073
2.04009e-163	0.551594	0.98	0.799	5.26405e-159	15	Cox5a
3.26836e-163	0.360475	0.467	0.104	8.43335e-159	15	C230088H06Rik
4.05855e-163	0.266785	0.307	0.041	1.04723e-158	15	Cdk2
1.97283e-161	0.264926	0.314	0.043	5.0905e-157	15	4933404O12Rik
1.03761e-160	0.563089	0.552	0.156	2.67734e-156	15	Gm8203
1.99191e-160	0.314778	0.398	0.075	5.13973e-156	15	Gm5391
6.18364e-160	0.252365	0.277	0.032	1.59557e-155	15	Rad54l
2.73863e-159	0.430482	1	0.995	7.06649e-155	15	Rpl3-ps1
4.16387e-159	0.531145	0.672	0.219	1.0744e-154	15	Slc25a13
5.97557e-159	0.465612	0.646	0.213	1.54188e-154	15	Lyar
1.22286e-158	0.510834	0.67	0.233	3.15534e-154	15	Nmral1
5.86986e-158	0.556762	0.999	0.945	1.5146e-153	15	Sem1
3.04069e-157	0.401658	0.431	0.091	7.84588e-153	15	Aim2
3.08415e-156	0.304318	0.27	0.032	7.95802e-152	15	Ccne2
5.2837e-156	0.285322	0.327	0.05	1.36335e-151	15	Dna2
7.09943e-156	0.374051	0.31	0.044	1.83187e-151	15	Adgrv1
2.79729e-155	0.560136	0.839	0.411	7.21785e-151	15	Nap1l1
7.61964e-155	0.327096	0.419	0.087	1.9661e-150	15	Gm6594
2.95382e-154	0.513095	0.769	0.323	7.62174e-150	15	Rpa3
3.05087e-154	0.272858	0.201	0.014	7.87215e-150	15	Aspm
4.00527e-154	0.548645	0.624	0.212	1.03348e-149	15	Topbp1
1.21061e-153	0.304262	0.173	0.009	3.12373e-149	15	Hmmr
2.89022e-153	0.559263	0.828	0.402	7.45762e-149	15	Rbbp7
8.67423e-153	0.341123	0.336	0.055	2.23821e-148	15	Tacc3
9.72465e-153	0.354506	0.251	0.028	2.50925e-148	15	Ccnb1
1.08855e-152	0.388989	1	0.999	2.80879e-148	15	Hsp90ab1
1.11171e-152	0.410157	0.539	0.147	2.86856e-148	15	Hirip3
1.48479e-152	0.325378	0.34	0.057	3.83121e-148	15	Cenpu
2.16804e-152	0.36391	0.492	0.122	5.59419e-148	15	Pmf1
1.24978e-151	0.639299	0.823	0.431	3.2248e-147	15	Dnajc9
3.29429e-151	0.63293	0.846	0.393	8.50026e-147	15	Insm1
6.88731e-151	0.519497	0.981	0.843	1.77713e-146	15	Snrpd1
8.41559e-151	0.421179	1	0.99	2.17147e-146	15	Rpl14
1.72254e-150	0.341189	0.452	0.103	4.44467e-146	15	Bola3
4.37653e-150	0.553394	0.807	0.389	1.12928e-145	15	Lsm2
6.57722e-150	0.39864	0.605	0.19	1.69712e-145	15	Ddx39
7.68303e-150	0.487307	0.993	0.907	1.98245e-145	15	Mrfap1
1.05019e-149	0.470454	0.645	0.227	2.70981e-145	15	Nudcd2
1.41072e-149	0.600049	0.908	0.538	3.64009e-145	15	Senp5
1.86428e-149	0.406124	1	0.991	4.8104e-145	15	Oaz1
1.10465e-148	0.520315	0.596	0.194	2.85034e-144	15	Prim1
2.52938e-148	0.292968	0.324	0.052	6.52656e-144	15	Shcbp1
9.82115e-148	0.758247	0.714	0.331	2.53415e-143	15	Slbp
1.72366e-146	0.308804	0.38	0.074	4.44756e-142	15	F2r
2.4064e-146	0.327467	0.391	0.08	6.20924e-142	15	Nme4
3.03947e-146	0.274952	0.309	0.047	7.84274e-142	15	Zgrf1
3.64404e-146	0.406062	0.479	0.123	9.40272e-142	15	Rfc5
5.72988e-146	0.589219	0.56	0.177	1.47848e-141	15	Lig1
5.86033e-146	0.322173	0.331	0.055	1.51214e-141	15	Dscc1
1.16733e-145	0.25665	0.233	0.024	3.01206e-141	15	Spc25
6.75564e-145	0.435737	0.32	0.052	1.74316e-140	15	Rad51b
1.13595e-144	0.521909	0.968	0.771	2.93109e-140	15	Dbi
6.95797e-144	0.312542	0.399	0.084	1.79536e-139	15	Epop
1.14523e-143	0.525489	0.984	0.802	2.95504e-139	15	Erh
1.46436e-143	0.824067	0.681	0.259	3.77849e-139	15	Gadd45g
2.96103e-142	0.552923	0.968	0.778	7.64036e-138	15	Prdx1
2.41567e-141	0.491195	0.996	0.948	6.23314e-137	15	Serbp1
4.12904e-141	0.512006	0.985	0.781	1.06542e-136	15	Gm13092
8.22995e-140	0.289536	0.33	0.058	2.12357e-135	15	Plk4
3.02194e-139	0.316591	0.332	0.059	7.79752e-135	15	Tcf19
4.59951e-139	0.553504	0.793	0.401	1.18681e-134	15	Nhp2
7.46129e-139	0.534874	0.892	0.499	1.92524e-134	15	Sae1
1.65898e-138	0.484743	0.592	0.197	4.28067e-134	15	Sall3
5.48965e-138	0.486782	0.749	0.327	1.4165e-133	15	Naa50
2.58022e-137	0.367597	0.394	0.086	6.65775e-133	15	Cenpq
7.8642e-137	0.602003	0.971	0.805	2.0292e-132	15	Gm4617
1.53332e-136	0.422465	0.642	0.228	3.95643e-132	15	Rnaseh2c
2.51325e-136	0.26581	0.328	0.058	6.48493e-132	15	B230118H07Rik
2.84981e-136	0.290501	0.291	0.045	7.35337e-132	15	C330027C09Rik
3.57827e-136	0.341908	0.448	0.112	9.23301e-132	15	Gm7846
1.22572e-135	0.301718	0.319	0.055	3.16273e-131	15	Fam111a
3.38048e-135	1.02738	0.472	0.138	8.72266e-131	15	Ube2c
8.22231e-135	0.55419	0.745	0.328	2.1216e-130	15	Pdia6
9.25153e-135	0.46627	0.61	0.214	2.38717e-130	15	Csrp1
2.07436e-134	0.267063	0.354	0.069	5.35247e-130	15	Rcc1
3.47283e-134	0.491433	0.777	0.346	8.96093e-130	15	Tpm4
3.84971e-134	0.482025	0.809	0.387	9.93341e-130	15	Snrpa1
6.69195e-134	0.484967	0.858	0.442	1.72672e-129	15	Pkig
9.1999e-134	0.283457	0.34	0.065	2.37385e-129	15	Pold2
1.26707e-133	0.629497	0.972	0.832	3.26941e-129	15	Tuba1b
3.7857e-133	0.509931	0.96	0.717	9.76825e-129	15	Chchd1
6.33056e-132	0.470319	0.867	0.471	1.63348e-127	15	Lsm6
9.10211e-132	0.541034	0.807	0.395	2.34862e-127	15	Rif1
9.13232e-132	0.349561	0.497	0.14	2.35641e-127	15	Higd1a
1.07602e-131	0.458339	0.64	0.242	2.77645e-127	15	Ptbp1
1.27277e-131	0.373342	0.372	0.081	3.28413e-127	15	Ncapg2
3.25274e-131	0.607019	0.735	0.339	8.39304e-127	15	Gm12892
3.57048e-131	0.53703	0.758	0.369	9.21291e-127	15	Nop10
5.77384e-131	0.389772	0.504	0.147	1.48982e-126	15	Gm7730
1.38162e-129	0.38902	0.459	0.121	3.56498e-125	15	Myo6
2.18394e-129	0.381891	0.503	0.149	5.63522e-125	15	Ipo5
9.49726e-129	0.504943	0.912	0.574	2.45058e-124	15	Srsf1
1.03081e-128	0.612798	0.726	0.338	2.65979e-124	15	Smc4
1.07002e-127	0.340799	0.475	0.132	2.76097e-123	15	Plp2
3.58667e-127	0.60046	0.977	0.799	9.25467e-123	15	Gm9800
9.37013e-127	0.489691	0.895	0.538	2.41777e-122	15	Sec61b
4.41769e-126	0.329341	0.302	0.054	1.1399e-121	15	Fbxo5
1.36178e-125	0.294582	0.323	0.061	3.51381e-121	15	Mthfd1l
1.67818e-125	0.59434	0.874	0.554	4.33021e-121	15	Mcm7
3.77277e-125	0.293132	0.335	0.066	9.73488e-121	15	Nfic
1.45139e-124	0.520629	0.991	0.921	3.74503e-120	15	Atp5e
9.62903e-124	0.629334	0.758	0.386	2.48458e-119	15	Lima1
1.035e-123	0.450308	0.981	0.827	2.67061e-119	15	Anp32a
1.32035e-123	0.499533	0.818	0.443	3.40691e-119	15	Cisd1
1.81975e-123	0.527731	0.965	0.802	4.6955e-119	15	Hnrnpf
2.55416e-123	0.526939	0.943	0.623	6.59049e-119	15	Ezr
2.84636e-123	0.486307	0.787	0.397	7.34446e-119	15	Trp53
3.21119e-123	0.475486	0.972	0.764	8.28582e-119	15	Uqcrq
3.60142e-123	0.485318	0.973	0.744	9.29274e-119	15	Pfn1
4.39844e-123	0.380047	0.525	0.168	1.13493e-118	15	Usp1
5.9605e-123	0.414039	0.656	0.262	1.53799e-118	15	Gar1
7.81758e-123	0.32369	0.39	0.092	2.01717e-118	15	Pim1
1.48701e-122	0.672757	0.887	0.589	3.83694e-118	15	Nell2
4.24769e-122	0.511783	0.891	0.563	1.09603e-117	15	Fkbp4
1.37718e-121	0.590674	0.258	0.041	3.55355e-117	15	Cdc20
2.19005e-121	0.309143	0.364	0.081	5.65099e-117	15	Timeless
2.70448e-121	0.796027	0.328	0.069	6.97836e-117	15	Hes5
9.01131e-120	0.295164	0.339	0.07	2.32519e-115	15	Acot1
2.66673e-119	0.344054	0.552	0.187	6.88096e-115	15	Gm26573
5.80795e-119	0.43808	0.984	0.889	1.49862e-114	15	H2afy
3.43574e-118	0.511758	0.6	0.232	8.86524e-114	15	H2afx
4.38902e-118	0.315449	0.407	0.105	1.1325e-113	15	Pola2
9.45304e-118	0.424588	0.984	0.844	2.43917e-113	15	Ssb
1.30141e-117	0.469126	0.809	0.434	3.35802e-113	15	Gm9531
1.39244e-117	0.310051	0.375	0.089	3.59291e-113	15	Dbf4
1.50217e-117	0.284861	0.391	0.095	3.87605e-113	15	Cdkn2c
3.16687e-117	0.35752	0.999	0.992	8.17147e-113	15	Rpsa
7.76039e-117	0.266674	0.274	0.047	2.00241e-112	15	Incenp
2.43962e-116	0.344589	0.543	0.178	6.29495e-112	15	Mpp6
3.86988e-116	0.566082	0.92	0.606	9.98544e-112	15	Nucks1
7.53968e-116	0.531649	0.674	0.294	1.94546e-111	15	Idi1
9.27935e-116	0.313282	0.327	0.068	2.39435e-111	15	Fut9
2.32111e-115	0.414276	0.996	0.967	5.98915e-111	15	Gm10275
3.67631e-115	0.477167	0.947	0.699	9.48598e-111	15	Ddx39b
1.20232e-114	0.476329	0.951	0.68	3.10234e-110	15	Banf1
1.30655e-114	0.26128	0.307	0.061	3.37128e-110	15	Syce2
1.78596e-114	0.291169	0.251	0.04	4.6083e-110	15	Thrsp
1.96548e-114	0.542413	0.592	0.24	5.07154e-110	15	Prim2
4.34301e-114	0.368666	0.566	0.205	1.12063e-109	15	Tex30
8.76127e-114	0.525712	0.892	0.581	2.26067e-109	15	Prdx6
2.63047e-113	0.360617	0.496	0.159	6.78739e-109	15	Rnaseh2a
3.06283e-113	0.414518	0.678	0.294	7.90303e-109	15	RP24-389J11.1
3.71685e-113	0.466399	0.899	0.565	9.59058e-109	15	Lsm3
4.15406e-113	0.353567	0.471	0.141	1.07187e-108	15	Nes
6.89735e-113	0.409473	0.673	0.286	1.77972e-108	15	Smim11
1.5592e-112	0.419988	0.786	0.39	4.02321e-108	15	Tmem14c
3.6822e-112	0.408089	0.763	0.372	9.50117e-108	15	Mrto4
5.92079e-112	0.403126	0.991	0.941	1.52774e-107	15	Atp5b
1.06636e-111	0.363062	1	0.991	2.75154e-107	15	Rpsa-ps10
1.10635e-111	0.46292	0.972	0.781	2.8547e-107	15	Pdap1
1.34601e-111	0.357487	0.561	0.199	3.47311e-107	15	Pbdc1
2.56774e-111	0.341478	0.37	0.093	6.62554e-107	15	Wdr76
2.93314e-111	0.495484	0.577	0.219	7.56839e-107	15	Cenpp
5.24887e-111	0.344696	0.544	0.187	1.35436e-106	15	Fasn
2.72391e-110	0.474347	0.86	0.514	7.02851e-106	15	Rbmxl1
3.79806e-110	0.304685	1	0.998	9.80012e-106	15	Rpl19-ps11
5.52801e-110	0.260256	0.328	0.071	1.42639e-105	15	Rad18
1.42256e-109	0.53275	0.876	0.579	3.67063e-105	15	RP23-184H3.5
1.72841e-109	0.288259	0.362	0.088	4.45982e-105	15	Mdc1
2.06929e-109	0.347992	0.999	0.997	5.3394e-105	15	Ywhae
6.10425e-109	0.448406	0.588	0.236	1.57508e-104	15	Dnmt1
1.38571e-108	0.440956	0.812	0.441	3.57555e-104	15	Sf3b5
1.89552e-108	0.437531	0.672	0.3	4.89101e-104	15	Tfdp1
3.69103e-108	0.436096	0.706	0.331	9.52396e-104	15	Ak2
4.06991e-108	0.477366	0.904	0.636	1.05016e-103	15	Hspd1
1.75459e-107	0.433112	0.854	0.495	4.52737e-103	15	Actl6a
1.95689e-107	0.442045	0.816	0.458	5.04937e-103	15	Srsf9
2.49351e-107	0.301144	0.419	0.117	6.43399e-103	15	Lap3
5.25315e-107	0.371131	0.423	0.12	1.35547e-102	15	Egfr
5.68636e-107	0.272712	0.404	0.109	1.46725e-102	15	Npm3
7.3413e-107	0.470055	0.918	0.63	1.89428e-102	15	Rps27l
8.52649e-107	0.357854	0.642	0.265	2.20009e-102	15	Gm14706
1.0241e-106	0.478358	0.778	0.396	2.64248e-102	15	Clic1
2.68658e-106	0.442327	0.969	0.74	6.93219e-102	15	Bzw1
6.6962e-106	0.334028	0.562	0.209	1.72782e-101	15	Abcf2
2.37677e-105	0.331357	0.999	0.992	6.13277e-101	15	Gm14586
3.06593e-105	0.444439	0.882	0.544	7.91102e-101	15	Snrnp40
3.63738e-105	0.399068	0.983	0.87	9.38554e-101	15	Tma7
5.45522e-105	0.422003	0.638	0.275	1.40761e-100	15	Nolc1
6.75836e-105	0.441362	0.705	0.332	1.74386e-100	15	Rfc2
2.80617e-104	0.529736	0.605	0.236	7.24077e-100	15	Zfpm2
3.9329e-104	0.448291	0.947	0.695	1.01481e-99	15	Minos1
4.02674e-104	0.471451	0.668	0.296	1.03902e-99	15	Insig1
4.78695e-104	0.346181	0.59	0.228	1.23518e-99	15	Uchl3
1.03232e-103	0.290765	0.455	0.14	2.6637e-99	15	Tsen15
1.41221e-103	0.44499	0.527	0.196	3.64393e-99	15	Atad5
1.74783e-103	0.448126	0.624	0.258	4.50991e-99	15	Myo10
2.72598e-103	0.385439	0.653	0.274	7.03385e-99	15	Prdx4
4.8997e-103	0.457462	0.83	0.469	1.26427e-98	15	H2afj
6.05812e-103	0.416821	0.786	0.412	1.56318e-98	15	Srrt
1.53724e-102	0.308699	0.399	0.112	3.96653e-98	15	Skp2
1.95785e-102	0.399248	1	0.972	5.05184e-98	15	Hnrnpa2b1
2.90243e-102	0.440488	0.94	0.691	7.48915e-98	15	Ptges3
3.12736e-102	0.358006	0.632	0.262	8.06954e-98	15	Mrpl36
3.46025e-102	0.453914	0.826	0.477	8.92849e-98	15	Ssrp1
4.05959e-102	0.373659	0.992	0.94	1.0475e-97	15	Eef1b2
4.71713e-102	0.327978	1	0.991	1.21716e-97	15	Cox8a
8.50795e-102	0.43343	0.851	0.521	2.19531e-97	15	Eif2s1
1.40059e-101	0.445105	0.739	0.367	3.61394e-97	15	Ube2ql1
2.61989e-101	0.512349	0.824	0.526	6.7601e-97	15	Paics
4.05646e-101	0.425855	0.654	0.294	1.04669e-96	15	Ddx21
4.44125e-101	0.441406	0.719	0.323	1.14598e-96	15	E130114P18Rik
9.90083e-101	0.380287	0.996	0.922	2.55471e-96	15	Gm12338
1.17006e-100	0.410891	0.798	0.43	3.01911e-96	15	Snrpf
1.38306e-100	0.333586	0.501	0.173	3.56872e-96	15	Hmg20b
1.38851e-100	0.324576	0.559	0.21	3.58276e-96	15	Tsfm
1.91668e-100	0.383731	0.997	0.958	4.9456e-96	15	Hsp90aa1
1.96521e-100	0.272816	0.418	0.123	5.07084e-96	15	Gfer
1.08839e-99	0.413874	0.987	0.911	2.80838e-95	15	Srsf7
1.28701e-99	0.557643	0.68	0.327	3.32086e-95	15	Msmo1
1.4e-99	0.429895	0.972	0.803	3.61243e-95	15	Prmt1
4.55143e-99	0.328505	1	0.999	1.17441e-94	15	Tmsb4x
6.28581e-99	0.345834	0.56	0.217	1.62193e-94	15	Rbm15
6.69894e-99	0.376911	0.638	0.273	1.72853e-94	15	Larp7
9.05412e-99	0.452209	0.993	0.937	2.33623e-94	15	Ncl
1.51339e-98	0.314213	0.507	0.177	3.905e-94	15	Tubg1
1.69703e-98	0.39281	0.723	0.349	4.37885e-94	15	Psmb3
1.70264e-98	0.258065	0.39	0.108	4.39331e-94	15	Nup93
1.93347e-98	0.342758	0.548	0.209	4.98893e-94	15	Pgp
2.62989e-98	0.301917	1	0.998	6.78592e-94	15	Wdr89
2.76564e-98	0.259462	1	1	7.13618e-94	15	mt-Cytb
2.96326e-98	0.304317	0.463	0.15	7.64609e-94	15	Cdc25a
3.74802e-98	0.44688	0.941	0.661	9.67103e-94	15	Pkm
7.31211e-98	0.393771	0.715	0.342	1.88674e-93	15	Kmt5a
1.32332e-97	0.285953	0.447	0.142	3.41457e-93	15	Uchl4
2.89559e-97	0.403712	0.67	0.311	7.47149e-93	15	Pole4
3.33458e-97	0.429461	0.961	0.781	8.60421e-93	15	Cnbp
4.19197e-97	0.367615	0.665	0.302	1.08165e-92	15	Gm4799
5.39203e-97	0.382592	0.562	0.218	1.3913e-92	15	Adk
7.23921e-97	0.421602	0.898	0.577	1.86793e-92	15	Eef1d
1.6471e-96	0.367301	0.657	0.293	4.25002e-92	15	Mrps28
2.94988e-96	0.29699	0.441	0.141	7.61157e-92	15	Ppat
3.89752e-96	0.31023	1	0.989	1.00568e-91	15	Hnrnpa0
4.86644e-96	0.354161	0.199	0.029	1.25569e-91	15	Gpc4
7.94623e-96	0.306318	0.529	0.196	2.05037e-91	15	Snrnp25
1.19769e-95	0.347477	0.594	0.243	3.0904e-91	15	Gm9769
1.859e-95	0.308079	0.537	0.2	4.79677e-91	15	Anapc15
2.15571e-95	0.323921	0.487	0.169	5.56238e-91	15	Gins1
2.61016e-95	0.431982	0.999	0.995	6.735e-91	15	Ccnd2
4.47681e-95	0.250367	0.331	0.082	1.15515e-90	15	Psat1
5.8854e-95	0.432598	0.955	0.715	1.51861e-90	15	Txn1
7.8845e-95	0.495754	0.988	0.932	2.03444e-90	15	Abracl
2.01082e-94	0.305647	0.439	0.141	5.18852e-90	15	Samd1
2.1044e-94	0.376532	0.783	0.415	5.42999e-90	15	2810025M15Rik
3.02011e-94	0.288751	0.423	0.132	7.79279e-90	15	Lbr
5.48439e-94	0.400294	0.882	0.567	1.41514e-89	15	Pgam1
5.78018e-94	0.406386	0.751	0.399	1.49146e-89	15	Etf1
7.93882e-94	0.412658	0.951	0.702	2.04845e-89	15	Chic2
9.09048e-94	0.382023	0.73	0.36	2.34562e-89	15	Pgk1
1.57965e-93	0.402089	0.911	0.622	4.07597e-89	15	RP24-547N4.5
1.75447e-93	0.300104	0.412	0.127	4.52706e-89	15	Fkbp5
1.89915e-93	0.329219	0.62	0.263	4.90037e-89	15	Nxt1
2.40928e-93	0.332202	0.54	0.209	6.21666e-89	15	Akr1b3
5.10156e-93	0.330524	0.541	0.207	1.31635e-88	15	Gatad2a
6.41122e-93	0.400488	0.774	0.413	1.65429e-88	15	Gm10320
8.86503e-93	0.257839	0.406	0.122	2.28744e-88	15	Ltv1
1.79039e-92	0.397356	0.743	0.396	4.61975e-88	15	Pa2g4
1.79569e-92	0.298256	0.541	0.207	4.63343e-88	15	Timm8a1
4.04244e-92	0.325091	0.52	0.198	1.04307e-87	15	Srm
5.20163e-92	0.440521	0.878	0.601	1.34218e-87	15	Supt16
9.70698e-92	0.354515	0.678	0.32	2.50469e-87	15	Gm4950
1.4653e-91	0.440323	0.91	0.658	3.78091e-87	15	Mrpl18
3.10306e-91	0.38286	0.519	0.199	8.00682e-87	15	Alms1
9.241e-91	0.402354	0.818	0.477	2.38446e-86	15	Asf1a
1.02614e-90	0.420616	0.85	0.538	2.64775e-86	15	Ndufs6
1.49451e-90	0.31002	0.499	0.181	3.85628e-86	15	Jam3
2.19558e-90	0.333274	0.533	0.21	5.66526e-86	15	Hspa14
2.50754e-90	0.391732	0.831	0.499	6.47021e-86	15	Magoh
4.55153e-90	0.391412	0.714	0.358	1.17443e-85	15	Ybx3
6.72446e-90	0.362019	0.541	0.213	1.73511e-85	15	Mbnl1
1.70475e-89	0.357137	0.668	0.314	4.39876e-85	15	Ybx1-ps2
3.77754e-89	0.274999	0.398	0.122	9.7472e-85	15	Tfrc
5.64244e-89	0.348888	0.585	0.24	1.45592e-84	15	Epb41
8.44188e-89	0.429305	0.871	0.612	2.17826e-84	15	C1qbp
9.36026e-89	0.431544	0.803	0.474	2.41523e-84	15	Bola2
1.37449e-88	0.401753	0.662	0.311	3.54659e-84	15	Hsph1
1.4442e-88	0.426909	0.902	0.651	3.72648e-84	15	Pnn
1.59963e-88	0.281209	0.495	0.179	4.12752e-84	15	Ccdc25
2.35204e-88	0.303332	0.501	0.186	6.06897e-84	15	Gart
4.29571e-88	0.263007	1	0.997	1.10842e-83	15	Gm4332
6.70426e-88	0.402423	0.884	0.579	1.7299e-83	15	Med10
1.41813e-87	0.393273	0.941	0.704	3.6592e-83	15	Mbd3
1.9925e-87	0.395228	0.658	0.317	5.14124e-83	15	Gm14681
2.148e-87	0.388855	0.96	0.817	5.54248e-83	15	Cox6c
3.38025e-87	0.342736	0.648	0.306	8.72206e-83	15	Eif3b
3.54538e-87	0.295298	0.557	0.223	9.14813e-83	15	Ndufaf4
3.71915e-87	0.358926	0.557	0.232	9.59652e-83	15	Dlgap3
3.74272e-87	0.299021	0.602	0.255	9.65734e-83	15	Prelid3b
4.50991e-87	0.347462	0.529	0.211	1.16369e-82	15	Rfc1
4.74892e-87	0.253523	0.363	0.105	1.22536e-82	15	Gsr
1.09724e-86	0.425428	0.927	0.684	2.83121e-82	15	Luc7l3
1.15138e-86	0.398628	0.968	0.789	2.9709e-82	15	Snu13
1.55606e-86	0.422782	0.819	0.492	4.01511e-82	15	Eif4a-ps4
2.13569e-86	0.34462	0.609	0.272	5.51073e-82	15	Gm17208
3.89957e-86	0.319436	0.637	0.28	1.00621e-81	15	Fbln1
7.78389e-86	0.386042	0.632	0.288	2.00848e-81	15	Atf5
7.80966e-86	0.289095	0.504	0.189	2.01513e-81	15	Hprt
1.90203e-85	0.373207	0.975	0.776	4.90782e-81	15	G3bp1
3.34002e-85	0.358926	0.757	0.398	8.61826e-81	15	Psmg4
5.46016e-85	0.375129	0.975	0.816	1.40889e-80	15	Swi5
8.39291e-85	0.354245	0.703	0.35	2.16562e-80	15	Pole3
8.82538e-85	0.371164	0.823	0.476	2.27721e-80	15	Maz
9.61433e-85	0.335549	0.439	0.153	2.48079e-80	15	Ncapd3
1.82387e-84	0.289152	0.452	0.16	4.70613e-80	15	2300009A05Rik
1.93935e-84	0.350364	0.606	0.27	5.00412e-80	15	Gm3571
9.71319e-84	0.283677	0.564	0.229	2.50629e-79	15	Eftud2
9.78002e-84	0.465954	0.824	0.506	2.52354e-79	15	Cyp51
2.10382e-83	0.381369	0.964	0.825	5.42848e-79	15	Cct3
2.32374e-83	0.26251	0.403	0.13	5.99594e-79	15	Nptx2
2.5473e-83	0.254925	0.307	0.08	6.57279e-79	15	Mfge8
2.79236e-83	0.285389	0.464	0.17	7.20512e-79	15	Nelfcd
3.00448e-83	0.293668	0.568	0.236	7.75247e-79	15	Cpsf2
9.0161e-83	0.394047	0.831	0.522	2.32642e-78	15	Dpy30
1.00306e-82	0.347646	0.406	0.136	2.58818e-78	15	Gpd1
1.06963e-82	0.383996	0.795	0.458	2.75996e-78	15	Hnrnpl
1.13385e-82	0.328751	0.569	0.243	2.92567e-78	15	Dck
1.32814e-82	0.387419	0.931	0.665	3.42699e-78	15	Smarca5
1.32938e-82	0.367955	0.669	0.33	3.43019e-78	15	Ints7
1.34081e-82	0.311373	0.527	0.211	3.45968e-78	15	Rexo2
1.51588e-82	0.33105	0.62	0.287	3.91143e-78	15	Sec13
1.80618e-82	0.26369	0.455	0.161	4.66049e-78	15	Gcsh
1.82771e-82	0.39828	0.968	0.827	4.71604e-78	15	Ndufc2
2.01764e-82	0.340187	0.632	0.296	5.20612e-78	15	Ipo7
2.03092e-82	0.321403	0.996	0.967	5.24039e-78	15	Fabp5
2.12033e-82	0.306802	0.568	0.238	5.47109e-78	15	Naa38
2.59183e-82	0.293796	1	0.993	6.68769e-78	15	Rpl10a-ps1
7.38641e-82	0.389534	0.799	0.476	1.90592e-77	15	1810037I17Rik
1.25835e-81	0.394422	0.87	0.595	3.24692e-77	15	Hspa4
5.4619e-81	0.290624	0.537	0.22	1.40933e-76	15	Taf10
6.13568e-81	0.394598	0.947	0.749	1.58319e-76	15	Gm10039
6.23323e-81	0.265944	0.4	0.131	1.60836e-76	15	Cenpj
6.90434e-81	0.367133	0.976	0.803	1.78153e-76	15	Psma7
6.9194e-81	0.314233	0.605	0.268	1.78541e-76	15	Mphosph10
8.42768e-81	0.450576	0.823	0.534	2.17459e-76	15	Cbx5
1.01292e-80	0.296614	0.529	0.211	2.61365e-76	15	Cetn2
1.29628e-80	0.500569	0.941	0.771	3.34478e-76	15	Hipk2
3.69949e-80	0.361286	0.791	0.457	9.5458e-76	15	Ccdc124
4.09437e-80	0.415256	0.721	0.417	1.05647e-75	15	Arl6ip6
4.57406e-80	0.296935	0.507	0.201	1.18025e-75	15	Hspd1-ps3
4.67514e-80	0.389235	0.918	0.688	1.20633e-75	15	Snrpd3
5.08023e-80	0.376238	0.918	0.647	1.31085e-75	15	Elavl1
5.52578e-80	0.360123	0.965	0.746	1.42582e-75	15	Gm6265
6.00049e-80	0.286368	0.481	0.186	1.54831e-75	15	Dnaaf2
8.25871e-80	0.385717	0.895	0.602	2.13099e-75	15	Taldo1
1.13836e-79	0.383062	0.86	0.58	2.93732e-75	15	Atp5g1
1.231e-79	0.35944	0.775	0.446	3.17636e-75	15	Ak6
1.79637e-79	0.339611	0.681	0.342	4.63518e-75	15	Kpnb1
4.96402e-79	0.347408	0.726	0.392	1.28086e-74	15	Cisd2
5.19203e-79	0.406868	0.872	0.621	1.3397e-74	15	Gng5
6.99407e-79	0.352757	0.664	0.34	1.80468e-74	15	Lrrc59
8.084e-79	0.285181	0.516	0.206	2.08591e-74	15	Vegfb
1.17945e-78	0.384944	0.949	0.758	3.04334e-74	15	Srsf6
1.48595e-78	0.304141	0.569	0.253	3.8342e-74	15	Ppil1
2.51361e-78	0.405893	0.798	0.468	6.48588e-74	15	Cux1
5.05529e-78	0.384768	0.936	0.711	1.30442e-73	15	Hnrnpa3
6.93797e-78	0.355409	0.839	0.53	1.7902e-73	15	Mrpl12
7.87329e-78	0.309287	0.588	0.268	2.03154e-73	15	Rrs1
9.3333e-78	0.420296	0.668	0.352	2.40827e-73	15	Hmgn3
1.52447e-77	0.284015	0.508	0.203	3.93358e-73	15	Nup153
1.59237e-77	0.345165	0.729	0.403	4.10878e-73	15	Eif4a3
3.69774e-77	0.37417	0.899	0.648	9.54127e-73	15	Phf5a
3.94413e-77	0.392768	0.887	0.614	1.0177e-72	15	Srsf10
5.78202e-77	0.344201	0.963	0.79	1.49194e-72	15	Tcp1
5.85122e-77	0.363796	0.943	0.744	1.50979e-72	15	H2afy2
9.45008e-77	0.474975	0.795	0.494	2.4384e-72	15	Pola1
1.05567e-76	0.270553	1	0.996	2.72395e-72	15	Rps11
1.43909e-76	0.272204	0.505	0.201	3.71329e-72	15	Fxn
1.87129e-76	0.343517	0.767	0.44	4.82849e-72	15	Mrpl42
3.17589e-76	0.361773	0.797	0.478	8.19475e-72	15	Hpf1
8.36359e-76	0.25917	0.435	0.156	2.15806e-71	15	Aven
1.1469e-75	0.367516	0.824	0.509	2.95935e-71	15	Trim28
1.16906e-75	0.375294	0.783	0.461	3.01653e-71	15	Arl2bp
1.32764e-75	0.29904	0.641	0.305	3.4257e-71	15	Cs
2.73145e-75	0.272933	0.452	0.173	7.04797e-71	15	Usp39
3.28728e-75	0.35212	0.806	0.482	8.48216e-71	15	Stip1
3.65881e-75	0.288266	0.412	0.145	9.44083e-71	15	Cntln
4.0296e-75	0.355657	0.523	0.23	1.03976e-70	15	Dlx6
4.30897e-75	0.353084	0.809	0.489	1.11184e-70	15	Gm12696
5.10159e-75	0.549278	0.831	0.602	1.31636e-70	15	Tubb4b
5.45299e-75	0.379502	0.872	0.568	1.40704e-70	15	Rpl22l1
6.02512e-75	0.284475	0.505	0.206	1.55466e-70	15	Lrp11
6.09111e-75	0.403547	0.951	0.762	1.57169e-70	15	Psmb2
7.41525e-75	0.312437	0.58	0.268	1.91336e-70	15	Exosc8
1.31459e-74	0.335519	0.991	0.884	3.39204e-70	15	Fubp1
1.34717e-74	0.369634	0.645	0.329	3.4761e-70	15	Gnl3
1.48859e-74	0.372713	0.777	0.444	3.841e-70	15	Pdia3
1.63924e-74	0.381895	0.995	0.961	4.22973e-70	15	Msi2
1.65721e-74	0.324762	0.359	0.117	4.27611e-70	15	Peg10
3.28185e-74	0.309116	0.613	0.285	8.46817e-70	15	Orc2
5.09787e-74	0.517292	0.757	0.524	1.3154e-69	15	Rfc3
5.55534e-74	0.428966	0.894	0.631	1.43344e-69	15	Pou3f2
7.70434e-74	0.369091	0.826	0.531	1.98795e-69	15	Snrpa
1.74384e-73	0.329736	0.566	0.256	4.49963e-69	15	Notch1
2.90838e-73	0.258688	0.469	0.182	7.5045e-69	15	Foxk2
4.25225e-73	0.333569	0.763	0.432	1.09721e-68	15	Pgls
6.17193e-73	0.30188	0.669	0.341	1.59254e-68	15	Prpf31
7.89923e-73	0.416793	0.903	0.673	2.03824e-68	15	Calr
8.42716e-73	0.32945	0.713	0.387	2.17446e-68	15	Gm5812
1.62715e-72	0.349899	0.969	0.848	4.19855e-68	15	Cct6a
1.74865e-72	0.278832	0.388	0.133	4.51205e-68	15	Svil
1.8984e-72	0.270992	1	1	4.89844e-68	15	mt-Nd1
2.92978e-72	0.383716	0.806	0.486	7.5597e-68	15	Oaz1-ps
3.07554e-72	0.288962	0.507	0.217	7.93582e-68	15	Gm6415
3.8594e-72	0.360256	0.759	0.435	9.95841e-68	15	Eif4g1
5.65225e-72	0.338722	0.94	0.711	1.45845e-67	15	Nudt21
5.88423e-72	0.310071	0.621	0.301	1.51831e-67	15	Parp1
7.51796e-72	0.344131	0.831	0.52	1.93986e-67	15	Eif4e
9.0914e-72	0.367476	0.931	0.706	2.34585e-67	15	Snrpd2
1.00405e-71	0.519672	0.739	0.471	2.59075e-67	15	Hes6
1.59501e-71	0.38354	0.919	0.68	4.1156e-67	15	Manf
1.79671e-71	0.306507	0.992	0.948	4.63606e-67	15	Ndufa4
2.16033e-71	0.275445	0.999	0.985	5.57429e-67	15	Rpl4
2.21774e-71	0.261235	1	0.993	5.72243e-67	15	Hnrnpk
2.66178e-71	0.280391	0.509	0.217	6.86818e-67	15	Gm15773
3.02813e-71	0.288462	0.564	0.256	7.81348e-67	15	Thap12
3.34623e-71	0.270831	1	0.996	8.63428e-67	15	Srsf3
8.34379e-71	0.357394	0.867	0.597	2.15295e-66	15	Txnl4a
1.42199e-70	0.337567	0.884	0.591	3.66916e-66	15	Strap
1.99803e-70	0.363261	0.806	0.494	5.15553e-66	15	Tsen34
2.21967e-70	0.314414	0.987	0.886	5.72742e-66	15	Cct2
3.70488e-70	0.325061	0.754	0.429	9.55971e-66	15	Msn
5.22183e-70	0.257697	0.453	0.179	1.34739e-65	15	Umps
1.20532e-69	0.264466	0.999	0.983	3.1101e-65	15	Atp5f1
1.51385e-69	0.522312	0.83	0.595	3.90619e-65	15	Hsp90b1
1.80323e-69	0.292532	0.612	0.296	4.65287e-65	15	Mak16
1.94196e-69	0.298268	0.488	0.205	5.01083e-65	15	Tpi1
2.20525e-69	0.408291	0.762	0.459	5.69022e-65	15	Hmgcr
2.36351e-69	0.259439	0.436	0.168	6.09856e-65	15	Fkbp2
2.45964e-69	0.381638	0.777	0.479	6.34661e-65	15	Nop58
2.50646e-69	0.255838	0.472	0.191	6.46742e-65	15	Slc25a39
3.33191e-69	0.254407	0.489	0.201	8.59733e-65	15	Apopt1
4.31618e-69	0.34166	0.735	0.422	1.1137e-64	15	Pds5a
4.60595e-69	0.391215	0.919	0.759	1.18847e-64	15	Hspe1
6.45038e-69	0.273301	0.481	0.201	1.66439e-64	15	Atf1
8.44791e-69	0.271089	0.501	0.212	2.17981e-64	15	Xrcc5
8.56184e-69	0.331673	0.649	0.337	2.20921e-64	15	Uqcc2
1.06858e-68	0.354954	0.886	0.615	2.75725e-64	15	Serf2
1.16599e-68	0.306488	0.985	0.888	3.00861e-64	15	Cbx1
1.31942e-68	0.267515	0.427	0.166	3.40449e-64	15	Npat
1.9389e-68	0.3214	0.973	0.837	5.00295e-64	15	Smdt1
2.20014e-68	0.291336	0.539	0.238	5.67701e-64	15	Cbfb
2.46892e-68	0.27177	0.277	0.077	6.37054e-64	15	Parp8
3.15787e-68	0.369296	0.956	0.787	8.14826e-64	15	Rbbp4
3.63927e-68	0.317831	0.834	0.513	9.39041e-64	15	Yaf2
4.39623e-68	0.43341	0.94	0.752	1.13436e-63	15	Snrpg
5.34251e-68	0.262656	0.557	0.253	1.37853e-63	15	Ncbp1
5.64456e-68	0.353223	0.818	0.521	1.45647e-63	15	Gspt1
6.40519e-68	0.311504	0.695	0.381	1.65273e-63	15	Psmd3
6.97448e-68	0.308327	1	0.99	1.79963e-63	15	Nfia
7.16883e-68	0.289426	0.996	0.931	1.84977e-63	15	Nlrc4
7.23747e-68	0.260994	0.391	0.142	1.86748e-63	15	Blm
7.82408e-68	0.298465	0.984	0.893	2.01885e-63	15	Tomm20
8.27303e-68	0.342631	0.742	0.427	2.13469e-63	15	Sms
1.10207e-67	0.338699	0.979	0.831	2.84368e-63	15	Ndufa2
1.27642e-67	0.320108	0.766	0.451	3.29354e-63	15	Cnih4
1.81289e-67	0.33889	0.908	0.67	4.67779e-63	15	Mrps14
1.83317e-67	0.258728	0.435	0.169	4.73013e-63	15	Pantr2
1.93476e-67	0.333385	0.613	0.307	4.99227e-63	15	Lrp1b
3.98544e-67	0.322043	0.765	0.447	1.02836e-62	15	Sf3b3
4.32529e-67	0.366633	0.948	0.753	1.11606e-62	15	Eif3a
4.71261e-67	0.316705	0.672	0.359	1.21599e-62	15	Trim27
5.08366e-67	0.318578	0.763	0.445	1.31174e-62	15	Tardbp
6.01847e-67	0.34411	0.801	0.51	1.55295e-62	15	Tcf3
6.87749e-67	0.415947	0.931	0.76	1.7746e-62	15	Ezh2
6.98184e-67	0.330876	0.969	0.828	1.80152e-62	15	Psmb6
7.10831e-67	0.26834	0.468	0.195	1.83416e-62	15	Exosc9
9.25823e-67	0.264492	0.452	0.186	2.3889e-62	15	Kars
1.00245e-66	0.325994	0.799	0.504	2.58663e-62	15	Psmc2
1.18579e-66	0.335638	0.798	0.5	3.0597e-62	15	Eif3d
2.17341e-66	0.355409	0.884	0.637	5.60805e-62	15	Nol7
2.51433e-66	0.345891	0.924	0.701	6.48773e-62	15	Rsl1d1
4.03628e-66	0.324251	0.951	0.783	1.04148e-61	15	Pomp
4.55678e-66	0.257691	0.544	0.248	1.17579e-61	15	Utp18
5.31096e-66	0.28962	0.614	0.308	1.37039e-61	15	Bccip
7.39137e-66	0.319112	0.793	0.49	1.90719e-61	15	Mrpl11
8.20273e-66	0.299783	0.561	0.264	2.11655e-61	15	Trip4
9.52156e-66	0.288874	0.604	0.296	2.45685e-61	15	Hddc2
9.98534e-66	0.341532	0.738	0.435	2.57652e-61	15	Hsd17b12
2.59033e-65	0.292408	0.673	0.36	6.68382e-61	15	Sf3b4
4.02829e-65	0.450786	0.934	0.738	1.03942e-60	15	Vim
4.03662e-65	0.28271	0.581	0.281	1.04157e-60	15	Pphln1
4.94991e-65	0.274688	0.555	0.26	1.27722e-60	15	Vps36
5.78253e-65	0.30669	0.6	0.29	1.49207e-60	15	Myo1b
6.16619e-65	0.285998	0.609	0.303	1.59106e-60	15	Mtch2
6.5286e-65	0.288462	0.535	0.246	1.68458e-60	15	Dkc1
7.57084e-65	0.258396	0.475	0.201	1.9535e-60	15	Camk2n2
7.90883e-65	0.28142	0.644	0.331	2.04072e-60	15	Idh3a
2.05247e-64	0.306555	0.737	0.432	5.29599e-60	15	D030056L22Rik
2.79354e-64	0.288371	0.987	0.886	7.20817e-60	15	Ube2i
3.07708e-64	0.335912	0.79	0.491	7.93979e-60	15	Cdv3
6.86787e-64	0.434121	0.814	0.546	1.77212e-59	15	Hmgcs1
1.04905e-63	0.336148	0.959	0.779	2.70686e-59	15	Hnrnpm
1.39172e-63	0.33097	0.612	0.315	3.59104e-59	15	Mib1
1.44041e-63	0.318108	0.739	0.438	3.71669e-59	15	Nabp2
1.73543e-63	0.298582	0.511	0.234	4.47792e-59	15	Dnajc15
2.16506e-63	0.268699	0.436	0.176	5.58652e-59	15	Rfwd3
2.66549e-63	0.316579	0.749	0.433	6.87777e-59	15	Akirin1
2.68475e-63	0.343492	0.93	0.718	6.92745e-59	15	Cacybp
3.11375e-63	0.333555	0.815	0.506	8.0344e-59	15	Oxct1
4.23616e-63	0.414638	0.677	0.368	1.09306e-58	15	Gab2
5.4477e-63	0.309407	0.699	0.402	1.40567e-58	15	Psmc5
8.96557e-63	0.323926	0.928	0.727	2.31339e-58	15	Psma4
1.16057e-62	0.341498	0.891	0.658	2.99462e-58	15	Eif1ax
1.35584e-62	0.33183	0.838	0.563	3.49847e-58	15	Gm10232
1.48107e-62	0.273982	0.523	0.243	3.82161e-58	15	Gm11560
1.52326e-62	0.294356	0.674	0.358	3.93046e-58	15	Dpm3
5.09999e-62	0.251207	0.539	0.247	1.31595e-57	15	Rps21
1.12521e-61	0.30453	0.539	0.252	2.90337e-57	15	Sfmbt1
1.45246e-61	0.266142	0.551	0.264	3.74778e-57	15	Gm6104
1.60079e-61	0.517345	0.347	0.127	4.13051e-57	15	Grm1
1.95102e-61	0.275155	0.551	0.267	5.03422e-57	15	Txn-ps1
2.17088e-61	0.265746	0.422	0.167	5.60153e-57	15	Znrf3
3.13226e-61	0.327869	0.682	0.377	8.08217e-57	15	Sqle
4.52401e-61	0.305242	0.992	0.94	1.16733e-56	15	mt-Nd5
4.67929e-61	0.45337	0.951	0.775	1.2074e-56	15	Gm10076
6.4254e-61	0.297852	0.717	0.41	1.65795e-56	15	Psmd1
9.11149e-61	0.339575	0.9	0.656	2.35104e-56	15	Mdh1
9.59422e-61	0.317431	0.818	0.529	2.4756e-56	15	Ppp1r2
9.76859e-61	0.267391	0.574	0.286	2.52059e-56	15	Rrp15
1.33046e-60	0.430742	0.762	0.506	3.43298e-56	15	Als2cr12
1.33997e-60	0.326695	0.778	0.487	3.45752e-56	15	Anapc13
1.91593e-60	0.283652	0.624	0.327	4.94367e-56	15	Nsmce1
2.10965e-60	0.276118	0.644	0.339	5.44352e-56	15	Khsrp
2.67788e-60	0.269651	0.527	0.25	6.90974e-56	15	Hsd17b7
3.11921e-60	0.335487	0.911	0.66	8.0485e-56	15	Pabpc1
3.15284e-60	0.264136	0.637	0.333	8.13527e-56	15	Rpsa-ps12
6.29223e-60	0.259423	0.464	0.198	1.62358e-55	15	Cpq
9.42237e-60	0.315514	0.782	0.493	2.43125e-55	15	Psmc4
1.29888e-59	0.280789	0.67	0.363	3.35151e-55	15	Emd
1.43998e-59	0.303785	0.628	0.339	3.71558e-55	15	Casp8ap2
1.68964e-59	0.300115	0.758	0.461	4.35977e-55	15	Psmd2
2.6626e-59	0.293255	0.727	0.437	6.87032e-55	15	Tomm40
2.70206e-59	0.303927	0.947	0.742	6.97213e-55	15	Ppp1ca
4.25858e-59	0.284348	0.987	0.912	1.09884e-54	15	Slc25a3
5.26821e-59	0.315394	0.493	0.228	1.35936e-54	15	Sv2c
6.26162e-59	0.30635	0.888	0.614	1.61569e-54	15	Dazap1
9.03853e-59	0.295923	0.781	0.476	2.33221e-54	15	Tkt
9.13179e-59	0.259539	0.523	0.244	2.35628e-54	15	Bola1
1.00564e-58	0.400351	0.473	0.213	2.59484e-54	15	Lin7a
1.09842e-58	0.26944	0.695	0.386	2.83427e-54	15	Lsm12
1.36705e-58	0.351552	0.884	0.681	3.52739e-54	15	Apex1
1.7654e-58	0.318481	0.727	0.438	4.55525e-54	15	Tcerg1
1.837e-58	0.323529	0.988	0.937	4.74e-54	15	Cox7a2
2.65139e-58	0.286877	0.953	0.816	6.84139e-54	15	Gtf2h5
3.02416e-58	0.341812	0.721	0.432	7.80325e-54	15	Metap1d
3.07886e-58	0.256887	0.527	0.25	7.94438e-54	15	Gm14277
3.5857e-58	0.272245	0.652	0.356	9.25218e-54	15	Mrpl54
3.67582e-58	0.355623	0.806	0.547	9.48471e-54	15	Baz1b
3.73184e-58	0.334815	0.754	0.488	9.62928e-54	15	Coro1c
4.19297e-58	0.29583	0.664	0.374	1.08191e-53	15	Dcakd
4.55386e-58	0.305112	0.93	0.728	1.17503e-53	15	Cct8
7.76447e-58	0.275385	0.586	0.301	2.00347e-53	15	Cenpx
1.27819e-57	0.301564	0.934	0.714	3.2981e-53	15	Dnaja2
1.40157e-57	0.32011	0.85	0.597	3.61648e-53	15	Psmd13
1.404e-57	0.284284	0.758	0.465	3.62274e-53	15	Ncbp2
2.73983e-57	0.269842	0.62	0.328	7.06958e-53	15	Acp1
2.83843e-57	0.317402	0.895	0.66	7.324e-53	15	Lsm8
3.19342e-57	0.358415	0.935	0.798	8.23997e-53	15	Mat2a
4.28996e-57	0.273018	0.562	0.281	1.10694e-52	15	Gm15210
4.97686e-57	0.282069	0.682	0.393	1.28418e-52	15	Yrdc
5.07332e-57	0.256904	0.592	0.3	1.30907e-52	15	Nup50
5.23994e-57	0.325994	0.576	0.3	1.35206e-52	15	Mid1
5.4074e-57	0.304523	0.936	0.722	1.39527e-52	15	Psmb5
5.72849e-57	0.257526	0.422	0.181	1.47812e-52	15	Fam136a
6.13542e-57	0.28056	0.588	0.307	1.58312e-52	15	Ago2
6.41436e-57	0.342334	0.892	0.652	1.6551e-52	15	Gm12350
7.83893e-57	0.318844	0.705	0.414	2.02268e-52	15	Smchd1
9.43335e-57	0.416324	0.919	0.726	2.43409e-52	15	Ptprz1
9.48133e-57	0.317634	0.894	0.633	2.44647e-52	15	Dhx15
1.07954e-56	0.263918	0.693	0.388	2.78555e-52	15	Cfap46
1.46155e-56	0.293322	0.747	0.45	3.77124e-52	15	U2af2
1.66042e-56	0.257588	0.991	0.938	4.28439e-52	15	Nedd8
1.72378e-56	0.268356	0.674	0.371	4.44788e-52	15	Ssu72
1.72511e-56	0.268592	0.742	0.441	4.45129e-52	15	Ap1s1
1.78699e-56	0.308685	0.846	0.586	4.61096e-52	15	Adh5
2.53424e-56	0.318218	0.828	0.553	6.53911e-52	15	Usp37
3.432e-56	0.254322	0.545	0.269	8.8556e-52	15	Gm9774
5.01819e-56	0.439594	0.938	0.787	1.29484e-51	15	Ncoa1
1.43207e-55	0.31602	0.785	0.509	3.69517e-51	15	Nudc-ps1
2.98679e-55	0.251741	0.577	0.295	7.70682e-51	15	Mrps25
3.2384e-55	0.297004	0.951	0.755	8.35605e-51	15	Uqcrb
3.25617e-55	0.309031	0.956	0.794	8.4019e-51	15	Psip1
4.06701e-55	0.389687	0.927	0.756	1.04941e-50	15	Tomm7
5.78562e-55	0.286821	0.629	0.349	1.49286e-50	15	Lrrc8b
6.76866e-55	0.309725	0.624	0.339	1.74652e-50	15	Yes1
7.08619e-55	0.260984	0.463	0.21	1.82845e-50	15	Sec61g
1.03304e-54	0.334473	0.967	0.865	2.66556e-50	15	Cdca7
1.06047e-54	0.280883	0.664	0.38	2.73634e-50	15	Fam92a
1.17045e-54	0.311404	0.806	0.537	3.0201e-50	15	Skp1a
1.49011e-54	0.386181	0.984	0.907	3.84492e-50	15	Cox7c
1.78642e-54	0.259495	0.993	0.929	4.60951e-50	15	Rpl19
1.94841e-54	0.300261	0.775	0.506	5.02747e-50	15	Ndufb8
1.97596e-54	0.252713	0.999	0.98	5.09857e-50	15	Rps25
3.15068e-54	0.294419	0.812	0.529	8.1297e-50	15	Tbcb
4.06791e-54	0.297174	0.953	0.826	1.04964e-49	15	Cct7
4.9232e-54	0.280666	0.855	0.59	1.27033e-49	15	Pfdn4
6.95168e-54	0.353777	0.898	0.705	1.79374e-49	15	Nsd2
7.59666e-54	0.292852	0.685	0.41	1.96017e-49	15	Ppm1g
7.62267e-54	0.331056	0.906	0.731	1.96688e-49	15	Mrpl34
7.66922e-54	0.268468	0.775	0.484	1.97889e-49	15	Prpf38a
9.00169e-54	0.271762	0.613	0.337	2.32271e-49	15	Timm50
9.83052e-54	0.301136	0.75	0.464	2.53657e-49	15	Gm12669
1.26007e-53	0.284197	0.838	0.574	3.25137e-49	15	Snrpc
1.3664e-53	0.254898	0.606	0.32	3.52573e-49	15	Flna
1.56983e-53	0.263496	0.6	0.322	4.05064e-49	15	Dynlt1f
2.68369e-53	0.272746	0.653	0.366	6.92472e-49	15	Plaa
2.99819e-53	0.323707	0.93	0.735	7.73622e-49	15	Calm3
5.14532e-53	0.287666	0.75	0.465	1.32765e-48	15	Vcp
5.73832e-53	0.279088	0.967	0.84	1.48066e-48	15	Cox6a1
6.89385e-53	0.314995	0.695	0.42	1.77882e-48	15	Fbxw7
7.1216e-53	0.279037	0.702	0.426	1.83759e-48	15	Ebna1bp2
7.70818e-53	0.315288	0.751	0.472	1.98894e-48	15	Clic4
1.06499e-52	0.273196	0.545	0.277	2.74799e-48	15	Luzp1
1.46207e-52	0.259395	0.632	0.349	3.77257e-48	15	Mrpl57
1.63009e-52	0.256166	0.997	0.967	4.20612e-48	15	Rps25-ps1
1.88233e-52	0.280634	0.624	0.334	4.85697e-48	15	Pard3
1.94754e-52	0.290465	0.705	0.42	5.02523e-48	15	Cby1
2.01171e-52	0.293342	0.815	0.531	5.19081e-48	15	Chtop
2.31428e-52	0.289268	0.75	0.488	5.97154e-48	15	Itpa
2.54117e-52	0.284926	0.906	0.66	6.55698e-48	15	U2af1
3.29405e-52	0.277837	0.678	0.392	8.49963e-48	15	Gm12481
4.99301e-52	0.287511	0.884	0.634	1.28835e-47	15	Arpp19
7.01109e-52	0.282777	0.992	0.936	1.80907e-47	15	Sfpq
7.2424e-52	0.278722	0.952	0.779	1.86876e-47	15	Timm13
7.58182e-52	0.274796	0.531	0.266	1.95634e-47	15	Rbbp8
7.85522e-52	0.330777	0.519	0.273	2.02688e-47	15	Gm10131
1.44807e-51	0.270626	0.572	0.294	3.73646e-47	15	Rab31
1.47588e-51	0.382659	0.891	0.682	3.80822e-47	15	Rpl14-ps1
1.57505e-51	0.32284	0.965	0.89	4.0641e-47	15	Hnrnpd
1.65563e-51	0.28295	0.9	0.692	4.27202e-47	15	Gtf2a2
2.66005e-51	0.281544	0.822	0.553	6.86373e-47	15	Cyc1
1.18847e-50	0.259106	0.614	0.341	3.06661e-46	15	Ciapin1
1.18999e-50	0.258201	0.536	0.274	3.07053e-46	15	Nop56
1.46285e-50	0.275439	0.485	0.237	3.77459e-46	15	Sc5d
1.77364e-50	0.271629	0.762	0.488	4.57651e-46	15	Rwdd1
2.41403e-50	0.464219	0.844	0.643	6.22893e-46	15	Erdr1
2.77561e-50	0.265501	0.644	0.368	7.1619e-46	15	Fam162a
3.1064e-50	0.281396	0.82	0.564	8.01544e-46	15	Psmd4
3.55975e-50	0.290293	0.928	0.756	9.18521e-46	15	Smarcc1
5.56534e-50	0.256063	0.56	0.296	1.43603e-45	15	D10Wsu102e
5.56597e-50	0.252857	0.637	0.365	1.43619e-45	15	Rcbtb2
5.64427e-50	0.266951	0.497	0.249	1.45639e-45	15	Mfng
1.17696e-49	0.283119	0.953	0.768	3.03691e-45	15	Elob
1.27582e-49	0.285089	0.864	0.622	3.29201e-45	15	Gm4540
1.63026e-49	0.252134	0.64	0.363	4.20655e-45	15	Golm1
2.09166e-49	0.275239	0.77	0.494	5.39711e-45	15	Ckap4
2.33399e-49	0.270639	0.749	0.473	6.02239e-45	15	Sdhb
2.83639e-49	0.302035	0.842	0.603	7.31874e-45	15	Dhx9
4.34873e-49	0.293891	0.855	0.607	1.1221e-44	15	Hspa9
4.48997e-49	0.328545	0.903	0.73	1.15855e-44	15	Chd7
5.87809e-49	0.283537	0.775	0.514	1.51672e-44	15	Naa15
5.97226e-49	0.267823	0.965	0.83	1.54102e-44	15	Pcbp1
6.99878e-49	0.285451	0.801	0.529	1.8059e-44	15	Stub1
7.26774e-49	0.277257	0.928	0.722	1.8753e-44	15	Cpsf6
1.19422e-48	0.255388	0.644	0.367	3.08145e-44	15	Pdcd5
1.24243e-48	0.265403	0.835	0.595	3.20583e-44	15	Polr2c
1.58309e-48	0.257232	0.951	0.835	4.08485e-44	15	Park7
1.815e-48	0.287042	0.941	0.777	4.68324e-44	15	Ppib
3.30837e-48	0.289584	0.645	0.377	8.5366e-44	15	Acaca
3.48866e-48	0.272696	0.82	0.549	9.00179e-44	15	Chchd3
4.0552e-48	0.294933	0.23	0.072	1.04636e-43	15	Gpc6
5.83281e-48	0.268055	0.757	0.478	1.50504e-43	15	Ivns1abp
5.90831e-48	0.257505	0.648	0.368	1.52452e-43	15	Cebpg
9.42627e-48	0.303217	0.661	0.395	2.43226e-43	15	Cdkal1
1.21076e-47	0.26942	0.914	0.712	3.12412e-43	15	Psma2
1.26479e-47	0.252503	0.668	0.395	3.26355e-43	15	Ndufb6
2.26037e-47	0.255848	0.932	0.734	5.83243e-43	15	Mrpl20
3.28812e-47	0.300784	0.676	0.413	8.48432e-43	15	Neto2
4.57334e-47	0.287599	0.735	0.487	1.18006e-42	15	Gmps
1.15129e-46	0.273779	0.715	0.451	2.97067e-42	15	Drap1
1.44072e-46	0.296598	0.968	0.883	3.7175e-42	15	Dclk2
2.62749e-46	0.369417	0.616	0.363	6.77972e-42	15	Sel1l3
2.75651e-46	0.258577	0.755	0.485	7.11262e-42	15	Ddx1
3.49091e-46	0.255223	0.616	0.354	9.0076e-42	15	Spata5
5.13899e-46	0.275319	0.878	0.683	1.32601e-41	15	Tmed2
5.46528e-46	0.263613	0.79	0.535	1.41021e-41	15	Arpc5l
5.67549e-46	0.256541	0.745	0.471	1.46445e-41	15	Psmb7
6.59412e-46	0.278282	0.726	0.445	1.70148e-41	15	Atp5k
9.72766e-46	0.261929	0.641	0.377	2.51003e-41	15	Bub3
1.01006e-45	0.279852	0.867	0.636	2.60626e-41	15	Gm6563
1.33839e-45	0.25814	0.758	0.497	3.45345e-41	15	Srsf4
1.51571e-45	0.269306	0.967	0.837	3.91099e-41	15	Pcbp2
1.93344e-45	0.361284	0.332	0.134	4.98886e-41	15	Sntb1
2.23457e-45	0.314624	0.677	0.423	5.76585e-41	15	Rad21
3.05633e-45	0.260155	0.895	0.655	7.88624e-41	15	Tmem167
3.42402e-45	0.281666	0.941	0.73	8.835e-41	15	Mdh2
7.43245e-45	0.261974	0.868	0.63	1.9178e-40	15	Eny2
8.0387e-45	0.359505	0.876	0.713	2.07423e-40	15	Hspa5
1.21295e-44	0.265809	0.822	0.585	3.12978e-40	15	Rnps1
1.88827e-44	0.315626	0.85	0.666	4.8723e-40	15	Ttc9b
2.01855e-44	0.283257	0.961	0.855	5.20847e-40	15	Cox7b
3.0747e-44	0.275974	0.951	0.787	7.93364e-40	15	Gm5436
3.08559e-44	0.258436	0.711	0.445	7.96176e-40	15	Zfp91
3.53483e-44	0.252876	0.596	0.34	9.12093e-40	15	Tbrg1
4.20869e-44	0.262056	0.819	0.571	1.08597e-39	15	Gm10221
5.92031e-44	0.263701	0.951	0.842	1.52762e-39	15	Atp5j2
8.15125e-44	0.258442	0.927	0.735	2.10327e-39	15	Ilf2
1.6264e-43	0.255973	0.718	0.455	4.1966e-39	15	Scaf11
1.70707e-43	0.260345	0.75	0.493	4.40475e-39	15	Sf1
2.1343e-43	0.267168	0.951	0.813	5.50712e-39	15	Caprin1
2.22755e-43	0.259674	0.62	0.371	5.74774e-39	15	Meaf6
2.44184e-43	0.267785	0.793	0.554	6.30069e-39	15	Psmd6
2.68012e-43	0.250838	0.645	0.39	6.91551e-39	15	2810004N23Rik
3.83958e-43	0.266563	0.891	0.691	9.90726e-39	15	Phb2
3.89068e-43	0.254954	0.896	0.669	1.00391e-38	15	Ube2l3
8.82104e-43	0.315727	0.856	0.685	2.27609e-38	15	Myef2
1.16896e-42	0.255484	0.93	0.737	3.01628e-38	15	Gm9840
2.21653e-42	0.276398	0.557	0.304	5.71931e-38	15	Slc1a2
2.50519e-42	0.253793	0.964	0.831	6.46414e-38	15	Rpl36al
4.57123e-42	0.26251	0.491	0.262	1.17951e-37	15	Slf1
4.64614e-42	0.260347	0.892	0.671	1.19884e-37	15	Txnrd1
9.3617e-42	0.274062	0.86	0.671	2.4156e-37	15	Gm11361
9.73304e-42	0.254786	0.943	0.783	2.51142e-37	15	Rps11-ps2
1.01259e-41	0.289003	0.956	0.84	2.61279e-37	15	Rps6-ps4
1.2132e-41	0.258248	0.806	0.571	3.13041e-37	15	Pcnp
1.99499e-41	0.253267	0.593	0.347	5.14768e-37	15	Gm43126
4.32856e-41	0.273882	0.742	0.497	1.1169e-36	15	Rplp2
1.15557e-40	0.259024	0.847	0.645	2.98171e-36	15	Glrx3
1.86331e-40	0.260536	0.815	0.575	4.80791e-36	15	RP23-371B13.5
2.99666e-40	0.262592	0.767	0.543	7.73229e-36	15	Tceal8
7.55914e-40	0.256407	0.884	0.682	1.95049e-35	15	Zfp207
1.68383e-39	0.261808	0.812	0.581	4.34479e-35	15	Smc1a
2.54459e-39	0.26993	0.888	0.695	6.56581e-35	15	Cbx3
3.83938e-39	0.393351	0.871	0.698	9.90676e-35	15	H1fx
8.9235e-39	0.252458	0.839	0.617	2.30253e-34	15	Txnl1
1.03e-38	0.274911	0.689	0.451	2.65771e-34	15	Slc25a12
3.34912e-38	0.26236	0.919	0.777	8.64172e-34	15	Uqcr10
4.45679e-38	0.340766	0.493	0.266	1.14999e-33	15	Slc1a3
5.40367e-37	0.345189	0.391	0.197	1.39431e-32	15	Hist1h2bc
7.88582e-37	0.264359	0.789	0.541	2.03478e-32	15	Tle1
9.10141e-37	0.275498	0.737	0.517	2.34844e-32	15	Bok
9.96494e-37	0.251533	0.988	0.921	2.57125e-32	15	Snrpe
6.39849e-36	0.276651	0.717	0.5	1.651e-31	15	Smc6
6.58288e-35	0.253822	0.624	0.389	1.69858e-30	15	Gm15459
8.07987e-35	0.266596	0.739	0.547	2.08485e-30	15	Orc6
1.27245e-34	0.251392	0.855	0.649	3.28331e-30	15	Hspa8
7.16018e-33	0.318017	0.848	0.661	1.84754e-28	15	Ccdc34
1.69119e-32	0.393421	0.241	0.1	4.36378e-28	15	Kcnq5
2.65608e-32	0.268224	0.894	0.739	6.85347e-28	15	Slc24a5
2.00467e-30	0.321825	0.688	0.47	5.17266e-26	15	Spag5
5.1989e-29	0.254424	0.822	0.638	1.34147e-24	15	Ndufc1
2.38001e-25	0.268122	0.79	0.622	6.14113e-21	15	Gm13889
1.36842e-23	0.25268	0.799	0.617	3.53093e-19	15	Atp5l
4.75139e-21	0.270065	0.855	0.711	1.226e-16	15	Dlx1as
2.8177e-20	0.281779	0.797	0.656	7.27052e-16	15	Gm5607
1.28995e-18	0.306286	0.876	0.795	3.32846e-14	15	Pak3
2.26405e-07	0.304465	0.469	0.423	0.00584193	15	Egr1

## Sheet: Sheet2
go	ref	obs	expected	pos.neg	fold.enrich	raw.p.value	fdr	cluster
chemorepulsion of branchiomotor axon (GO:0021793)	1	1	0.02	+	42.65	0.0453	0.595	Cluster 1
positive regulation of calcium ion-dependent exocytosis of neurotransmitter (GO:1903235)	1	1	0.02	+	42.65	0.0453	0.595	Cluster 1
principal sensory nucleus of trigeminal nerve development (GO:0021740)	2	2	0.05	+	42.65	0.00305	0.0903	Cluster 1
trigeminal sensory nucleus development (GO:0021730)	2	2	0.05	+	42.65	0.00305	0.0901	Cluster 1
positive regulation of forebrain neuron differentiation (GO:2000979)	1	1	0.02	+	42.65	0.0453	0.594	Cluster 1
negative regulation of erythrocyte aggregation (GO:0034119)	1	1	0.02	+	42.65	0.0453	0.594	Cluster 1
negative regulation of erythrocyte clearance (GO:0034107)	1	1	0.02	+	42.65	0.0453	0.593	Cluster 1
regulation of erythrocyte clearance (GO:0034106)	1	1	0.02	+	42.65	0.0453	0.593	Cluster 1
respiratory burst involved in inflammatory response (GO:0002536)	1	1	0.02	+	42.65	0.0453	0.592	Cluster 1
synchronous neurotransmitter secretion (GO:0071911)	1	1	0.02	+	42.65	0.0453	0.592	Cluster 1
chemokine receptor transport within lipid bilayer (GO:0033606)	1	1	0.02	+	42.65	0.0453	0.591	Cluster 1
negative regulation of T cell homeostatic proliferation (GO:0046014)	1	1	0.02	+	42.65	0.0453	0.591	Cluster 1
ammon gyrus development (GO:0021541)	1	1	0.02	+	42.65	0.0453	0.59	Cluster 1
negative regulation of epithelial cell proliferation involved in lung morphogenesis (GO:2000795)	1	1	0.02	+	42.65	0.0453	0.59	Cluster 1
negative regulation of mesenchymal cell proliferation involved in lung development (GO:2000791)	2	2	0.05	+	42.65	0.00305	0.09	Cluster 1
regulation of mesenchymal cell proliferation involved in lung development (GO:2000790)	2	2	0.05	+	42.65	0.00305	0.0898	Cluster 1
positive regulation of N-terminal peptidyl-lysine acetylation (GO:2000761)	1	1	0.02	+	42.65	0.0453	0.589	Cluster 1
regulation of N-terminal peptidyl-lysine acetylation (GO:2000759)	1	1	0.02	+	42.65	0.0453	0.589	Cluster 1
negative regulation of transforming growth factor beta3 production (GO:0032913)	1	1	0.02	+	42.65	0.0453	0.588	Cluster 1
olfactory bulb axon guidance (GO:0071678)	1	1	0.02	+	42.65	0.0453	0.588	Cluster 1
primary adaptive immune response involving T cells and B cells (GO:0090721)	1	1	0.02	+	42.65	0.0453	0.587	Cluster 1
primary adaptive immune response (GO:0090720)	1	1	0.02	+	42.65	0.0453	0.587	Cluster 1
negative regulation of chromosome condensation (GO:1902340)	1	1	0.02	+	42.65	0.0453	0.586	Cluster 1
hepatocyte cell migration (GO:0002194)	1	1	0.02	+	42.65	0.0453	0.586	Cluster 1
glutamate decarboxylation to succinate (GO:0006540)	1	1	0.02	+	42.65	0.0453	0.585	Cluster 1
subtelomeric heterochromatin organization (GO:0140461)	1	1	0.02	+	42.65	0.0453	0.585	Cluster 1
snRNA export from nucleus (GO:0006408)	1	1	0.02	+	42.65	0.0453	0.584	Cluster 1
peptide amidation (GO:0001519)	1	1	0.02	+	42.65	0.0453	0.584	Cluster 1
chemokine receptor transport out of membrane raft (GO:0032600)	1	1	0.02	+	42.65	0.0453	0.583	Cluster 1
histone H4-K16 deacetylation (GO:1990678)	1	1	0.02	+	42.65	0.0453	0.583	Cluster 1
acinar cell differentiation (GO:0090425)	1	1	0.02	+	42.65	0.0453	0.582	Cluster 1
protein transport out of membrane raft (GO:0032599)	1	1	0.02	+	42.65	0.0453	0.582	Cluster 1
postsynaptic neurotransmitter receptor cycle (GO:0099630)	1	1	0.02	+	42.65	0.0453	0.582	Cluster 1
neurotransmitter receptor cycle (GO:0099627)	1	1	0.02	+	42.65	0.0453	0.581	Cluster 1
negative regulation of glutamate metabolic process (GO:2000212)	1	1	0.02	+	42.65	0.0453	0.581	Cluster 1
negative regulation of formation of growth cone in injured axon (GO:1905943)	1	1	0.02	+	42.65	0.0453	0.58	Cluster 1
regulation of formation of growth cone in injured axon (GO:1905942)	1	1	0.02	+	42.65	0.0453	0.58	Cluster 1
positive regulation of telomeric RNA transcription from RNA pol II promoter (GO:1901582)	1	1	0.02	+	42.65	0.0453	0.579	Cluster 1
negative regulation of telomeric RNA transcription from RNA pol II promoter (GO:1901581)	1	1	0.02	+	42.65	0.0453	0.579	Cluster 1
regulation of telomeric RNA transcription from RNA pol II promoter (GO:1901580)	1	1	0.02	+	42.65	0.0453	0.578	Cluster 1
positive regulation of invadopodium disassembly (GO:1905929)	1	1	0.02	+	42.65	0.0453	0.578	Cluster 1
regulation of invadopodium disassembly (GO:1905927)	1	1	0.02	+	42.65	0.0453	0.577	Cluster 1
cAMP catabolic process (GO:0006198)	1	1	0.02	+	42.65	0.0453	0.577	Cluster 1
superior temporal gyrus development (GO:0071109)	1	1	0.02	+	42.65	0.0453	0.576	Cluster 1
maintenance of presynaptic active zone structure (GO:0048790)	1	1	0.02	+	42.65	0.0453	0.576	Cluster 1
protein amidation (GO:0018032)	1	1	0.02	+	42.65	0.0453	0.575	Cluster 1
anterograde dendritic transport of messenger ribonucleoprotein complex (GO:0098964)	2	2	0.05	+	42.65	0.00305	0.0896	Cluster 1
negative regulation of negative chemotaxis (GO:0050925)	2	2	0.05	+	42.65	0.00305	0.0895	Cluster 1
positive regulation of membrane depolarization during cardiac muscle cell action potential (GO:1900827)	1	1	0.02	+	42.65	0.0453	0.575	Cluster 1
signal clustering (GO:1990256)	1	1	0.02	+	42.65	0.0453	0.575	Cluster 1
negative regulation of phospholipase C-activating G protein-coupled receptor signaling pathway (GO:1900737)	1	1	0.02	+	42.65	0.0453	0.574	Cluster 1
chemoattraction of serotonergic neuron axon (GO:0036517)	1	1	0.02	+	42.65	0.0453	0.574	Cluster 1
positive regulation of ERBB3 signaling pathway (GO:1905580)	1	1	0.02	+	42.65	0.0453	0.573	Cluster 1
regulation of ERBB3 signaling pathway (GO:1905578)	1	1	0.02	+	42.65	0.0453	0.573	Cluster 1
fast, calcium ion-dependent exocytosis of neurotransmitter (GO:0098746)	1	1	0.02	+	42.65	0.0453	0.572	Cluster 1
positive regulation of Golgi lumen acidification (GO:1905528)	1	1	0.02	+	42.65	0.0453	0.572	Cluster 1
detection of cold stimulus involved in thermoception (GO:0120169)	1	1	0.02	+	42.65	0.0453	0.571	Cluster 1
positive regulation of ARF protein signal transduction (GO:0032014)	2	2	0.05	+	42.65	0.00305	0.0893	Cluster 1
cellular response to glycine (GO:1905430)	1	1	0.02	+	42.65	0.0453	0.571	Cluster 1
subtelomeric heterochromatin assembly (GO:0031509)	1	1	0.02	+	42.65	0.0453	0.57	Cluster 1
cell adhesion involved in sprouting angiogenesis (GO:0120078)	1	1	0.02	+	42.65	0.0453	0.57	Cluster 1
angiogenic sprout fusion (GO:0120077)	1	1	0.02	+	42.65	0.0453	0.57	Cluster 1
negative regulation of cell proliferation in midbrain (GO:1904934)	1	1	0.02	+	42.65	0.0453	0.569	Cluster 1
protein localization to M-band (GO:0036309)	1	1	0.02	+	42.65	0.0453	0.569	Cluster 1
cellular response to flavonoid (GO:1905396)	1	1	0.02	+	42.65	0.0453	0.568	Cluster 1
response to flavonoid (GO:1905395)	1	1	0.02	+	42.65	0.0453	0.568	Cluster 1
response to singlet oxygen (GO:0000304)	1	1	0.02	+	42.65	0.0453	0.567	Cluster 1
negative regulation of neuron remodeling (GO:1904800)	1	1	0.02	+	42.65	0.0453	0.567	Cluster 1
negative regulation of RNA polymerase II transcription preinitiation complex assembly (GO:0017055)	1	1	0.02	+	42.65	0.0453	0.566	Cluster 1
regulation of neuron remodeling (GO:1904799)	1	1	0.02	+	42.65	0.0453	0.566	Cluster 1
regulation of synaptic plasticity by receptor localization to synapse (GO:1900383)	1	1	0.02	+	42.65	0.0453	0.565	Cluster 1
regulation of proteinase activated receptor activity (GO:1900276)	1	1	0.02	+	42.65	0.0453	0.565	Cluster 1
negative regulation of actin-dependent ATPase activity (GO:1904622)	1	1	0.02	+	42.65	0.0453	0.565	Cluster 1
regulation of actin-dependent ATPase activity (GO:1904621)	1	1	0.02	+	42.65	0.0453	0.564	Cluster 1
negative regulation of actin binding (GO:1904617)	1	1	0.02	+	42.65	0.0453	0.564	Cluster 1
positive regulation of anterograde axonal transport of mitochondrion (GO:0061881)	1	1	0.02	+	42.65	0.0453	0.563	Cluster 1
regulation of anterograde axonal transport of mitochondrion (GO:0061880)	1	1	0.02	+	42.65	0.0453	0.563	Cluster 1
negative regulation of actin filament binding (GO:1904530)	1	1	0.02	+	42.65	0.0453	0.562	Cluster 1
fatty acid primary amide metabolic process (GO:0062126)	1	1	0.02	+	42.65	0.0453	0.562	Cluster 1
fatty acid primary amide biosynthetic process (GO:0062112)	1	1	0.02	+	42.65	0.0453	0.561	Cluster 1
regulation of D-erythro-sphingosine kinase activity (GO:1900022)	1	1	0.02	+	42.65	0.0453	0.561	Cluster 1
evoked neurotransmitter secretion (GO:0061670)	1	1	0.02	+	42.65	0.0453	0.561	Cluster 1
regulation of microtubule anchoring at centrosome (GO:0150101)	1	1	0.02	+	42.65	0.0453	0.56	Cluster 1
sensory perception of cold stimulus (GO:0062035)	1	1	0.02	+	42.65	0.0453	0.56	Cluster 1
actin filament bundle retrograde transport (GO:0061573)	1	1	0.02	+	42.65	0.0453	0.559	Cluster 1
positive regulation of synaptic vesicle priming (GO:0010808)	2	2	0.05	+	42.65	0.00305	0.0891	Cluster 1
post-embryonic forelimb morphogenesis (GO:0035128)	1	1	0.02	+	42.65	0.0453	0.559	Cluster 1
post-embryonic limb morphogenesis (GO:0035127)	1	1	0.02	+	42.65	0.0453	0.558	Cluster 1
post-embryonic appendage morphogenesis (GO:0035120)	1	1	0.02	+	42.65	0.0453	0.558	Cluster 1
cardiac cell fate specification (GO:0060912)	1	1	0.02	+	42.65	0.0453	0.558	Cluster 1
interneuron axon guidance (GO:0097376)	1	1	0.02	+	42.65	0.0453	0.557	Cluster 1
negative regulation of muscle filament sliding (GO:1904113)	1	1	0.02	+	42.65	0.0453	0.557	Cluster 1
positive regulation of cell communication by electrical coupling (GO:0010650)	1	1	0.02	+	42.65	0.0453	0.556	Cluster 1
planar cell polarity pathway involved in pericardium morphogenesis (GO:0061354)	1	1	0.02	+	42.65	0.0453	0.556	Cluster 1
planar cell polarity pathway involved in cardiac muscle tissue morphogenesis (GO:0061350)	1	1	0.02	+	42.65	0.0453	0.555	Cluster 1
planar cell polarity pathway involved in cardiac right atrium morphogenesis (GO:0061349)	1	1	0.02	+	42.65	0.0453	0.555	Cluster 1
planar cell polarity pathway involved in ventricular septum morphogenesis (GO:0061348)	1	1	0.02	+	42.65	0.0453	0.554	Cluster 1
planar cell polarity pathway involved in outflow tract morphogenesis (GO:0061347)	1	1	0.02	+	42.65	0.0453	0.554	Cluster 1
sperm entry (GO:0035037)	1	1	0.02	+	42.65	0.0453	0.554	Cluster 1
positive regulation of T cell homeostatic proliferation (GO:0042103)	1	1	0.02	+	42.65	0.0453	0.553	Cluster 1
negative regulation of phospholipase D activity (GO:1904006)	1	1	0.02	+	42.65	0.0453	0.553	Cluster 1
regulation of phospholipase D activity (GO:1904005)	1	1	0.02	+	42.65	0.0453	0.552	Cluster 1
lamellipodium assembly involved in ameboidal cell migration (GO:0003363)	1	1	0.02	+	42.65	0.0453	0.552	Cluster 1
endoplasmic reticulum polarization (GO:0061163)	1	1	0.02	+	42.65	0.0453	0.551	Cluster 1
lung ciliated cell differentiation (GO:0061141)	1	1	0.02	+	42.65	0.0453	0.551	Cluster 1
branching involved in pancreas morphogenesis (GO:0061114)	1	1	0.02	+	42.65	0.0453	0.551	Cluster 1
dendritic cell dendrite assembly (GO:0097026)	1	1	0.02	+	42.65	0.0453	0.55	Cluster 1
negative regulation of synaptic growth at neuromuscular junction (GO:0045886)	1	1	0.02	+	42.65	0.0453	0.55	Cluster 1
positive regulation of neural retina development (GO:0061075)	2	2	0.05	+	42.65	0.00305	0.089	Cluster 1
cerebral cortex GABAergic interneuron fate commitment (GO:0021893)	2	2	0.05	+	42.65	0.00305	0.0888	Cluster 1
extension of a leading process involved in cell motility in cerebral cortex radial glia guided migration (GO:0021816)	1	1	0.02	+	42.65	0.0453	0.549	Cluster 1
positive regulation of amacrine cell differentiation (GO:1902871)	2	2	0.05	+	42.65	0.00305	0.0886	Cluster 1
positive regulation of retina development in camera-type eye (GO:1902868)	2	2	0.05	+	42.65	0.00305	0.0885	Cluster 1
regulation of negative chemotaxis (GO:0050923)	4	3	0.09	+	31.99	0.000391	0.0164	Cluster 1
establishment of neuroblast polarity (GO:0045200)	3	2	0.07	+	28.44	0.005	0.132	Cluster 1
establishment or maintenance of neuroblast polarity (GO:0045196)	3	2	0.07	+	28.44	0.005	0.131	Cluster 1
negative regulation of phospholipase C activity (GO:1900275)	3	2	0.07	+	28.44	0.005	0.131	Cluster 1
maintenance of protein location in plasma membrane (GO:0072660)	3	2	0.07	+	28.44	0.005	0.131	Cluster 1
maintenance of protein location in membrane (GO:0072658)	3	2	0.07	+	28.44	0.005	0.131	Cluster 1
commitment of multipotent stem cells to neuronal lineage in forebrain (GO:0021898)	3	2	0.07	+	28.44	0.005	0.131	Cluster 1
regulation of transcription from RNA polymerase II promoter involved in forebrain neuron fate commitment (GO:0021882)	3	2	0.07	+	28.44	0.005	0.13	Cluster 1
acrosomal vesicle exocytosis (GO:0060478)	5	3	0.12	+	25.59	0.000614	0.0247	Cluster 1
negative regulation of cellular amino acid metabolic process (GO:0045763)	2	1	0.05	+	21.33	0.0672	0.718	Cluster 1
postganglionic parasympathetic fiber development (GO:0021784)	2	1	0.05	+	21.33	0.0672	0.718	Cluster 1
striatal medium spiny neuron differentiation (GO:0021773)	4	2	0.09	+	21.33	0.00739	0.177	Cluster 1
mammillary body development (GO:0021767)	2	1	0.05	+	21.33	0.0672	0.717	Cluster 1
globus pallidus development (GO:0021759)	2	1	0.05	+	21.33	0.0672	0.717	Cluster 1
superior olivary nucleus maturation (GO:0021722)	2	1	0.05	+	21.33	0.0672	0.716	Cluster 1
superior olivary nucleus development (GO:0021718)	2	1	0.05	+	21.33	0.0672	0.716	Cluster 1
positive regulation of lens fiber cell differentiation (GO:1902748)	2	1	0.05	+	21.33	0.0672	0.715	Cluster 1
regulation of erythrocyte aggregation (GO:0034118)	2	1	0.05	+	21.33	0.0672	0.715	Cluster 1
alpha-tubulin acetylation (GO:0071929)	2	1	0.05	+	21.33	0.0672	0.714	Cluster 1
cerebellar Purkinje cell layer maturation (GO:0021691)	2	1	0.05	+	21.33	0.0672	0.714	Cluster 1
vagus nerve morphogenesis (GO:0021644)	2	1	0.05	+	21.33	0.0672	0.713	Cluster 1
cellular response to norepinephrine stimulus (GO:0071874)	2	1	0.05	+	21.33	0.0672	0.713	Cluster 1
negative regulation of vasculogenesis (GO:2001213)	2	1	0.05	+	21.33	0.0672	0.712	Cluster 1
regulation of melanosome organization (GO:1903056)	2	1	0.05	+	21.33	0.0672	0.712	Cluster 1
central nervous system morphogenesis (GO:0021551)	2	1	0.05	+	21.33	0.0672	0.711	Cluster 1
regulation of exocyst assembly (GO:0001928)	2	1	0.05	+	21.33	0.0672	0.711	Cluster 1
positive regulation of dense core granule biogenesis (GO:2000707)	2	1	0.05	+	21.33	0.0672	0.71	Cluster 1
positive regulation of protein K48-linked ubiquitination (GO:1902524)	2	1	0.05	+	21.33	0.0672	0.71	Cluster 1
endoplasmic reticulum tubular network formation (GO:0071787)	4	2	0.09	+	21.33	0.00739	0.177	Cluster 1
positive regulation of lens epithelial cell proliferation (GO:2001111)	2	1	0.05	+	21.33	0.0672	0.71	Cluster 1
regulation of lens epithelial cell proliferation (GO:2001109)	2	1	0.05	+	21.33	0.0672	0.709	Cluster 1
nephron tubule epithelial cell differentiation (GO:0072160)	2	1	0.05	+	21.33	0.0672	0.709	Cluster 1
positive regulation of histone H4-K16 acetylation (GO:2000620)	2	1	0.05	+	21.33	0.0672	0.708	Cluster 1
negative regulation of ripoptosome assembly involved in necroptotic process (GO:1902443)	2	1	0.05	+	21.33	0.0672	0.708	Cluster 1
regulation of ripoptosome assembly involved in necroptotic process (GO:1902442)	2	1	0.05	+	21.33	0.0672	0.707	Cluster 1
positive regulation of male mating behavior (GO:1902437)	2	1	0.05	+	21.33	0.0672	0.707	Cluster 1
virus maturation (GO:0019075)	2	1	0.05	+	21.33	0.0672	0.706	Cluster 1
optic placode formation (GO:0001743)	2	1	0.05	+	21.33	0.0672	0.706	Cluster 1
negative regulation of platelet-derived growth factor receptor-alpha signaling pathway (GO:2000584)	2	1	0.05	+	21.33	0.0672	0.705	Cluster 1
negative regulation of microtubule motor activity (GO:2000575)	2	1	0.05	+	21.33	0.0672	0.705	Cluster 1
establishment of planar polarity involved in nephron morphogenesis (GO:0072046)	2	1	0.05	+	21.33	0.0672	0.704	Cluster 1
cervix development (GO:0060067)	2	1	0.05	+	21.33	0.0672	0.704	Cluster 1
mediolateral intercalation (GO:0060031)	2	1	0.05	+	21.33	0.0672	0.703	Cluster 1
negative regulation of relaxation of cardiac muscle (GO:1901898)	2	1	0.05	+	21.33	0.0672	0.703	Cluster 1
maintenance of imprinting at mating-type locus (GO:0071517)	2	1	0.05	+	21.33	0.0672	0.702	Cluster 1
neurotransmitter receptor biosynthetic process (GO:0045212)	2	1	0.05	+	21.33	0.0672	0.702	Cluster 1
negative regulation of neuron maturation (GO:0014043)	4	2	0.09	+	21.33	0.00739	0.177	Cluster 1
positive regulation of timing of anagen (GO:0051885)	2	1	0.05	+	21.33	0.0672	0.702	Cluster 1
negative regulation of histone deacetylase activity (GO:1901726)	2	1	0.05	+	21.33	0.0672	0.701	Cluster 1
regulation of glutamate metabolic process (GO:2000211)	4	2	0.09	+	21.33	0.00739	0.176	Cluster 1
positive regulation of acylglycerol transport (GO:1901508)	2	1	0.05	+	21.33	0.0672	0.701	Cluster 1
regulation of acylglycerol transport (GO:1901506)	2	1	0.05	+	21.33	0.0672	0.7	Cluster 1
positive regulation of triglyceride transport (GO:1905885)	2	1	0.05	+	21.33	0.0672	0.7	Cluster 1
regulation of triglyceride transport (GO:1905883)	2	1	0.05	+	21.33	0.0672	0.699	Cluster 1
actin filament bundle distribution (GO:0070650)	2	1	0.05	+	21.33	0.0672	0.699	Cluster 1
canonical Wnt signaling pathway involved in positive regulation of apoptotic process (GO:0044337)	2	1	0.05	+	21.33	0.0672	0.698	Cluster 1
NMDA selective glutamate receptor signaling pathway (GO:0098989)	4	2	0.09	+	21.33	0.00739	0.176	Cluster 1
anterograde dendritic transport of neurotransmitter receptor complex (GO:0098971)	4	2	0.09	+	21.33	0.00739	0.176	Cluster 1
regulation of SA node cell action potential (GO:0098907)	2	1	0.05	+	21.33	0.0672	0.698	Cluster 1
positive regulation of collateral sprouting of injured axon (GO:0048694)	2	1	0.05	+	21.33	0.0672	0.697	Cluster 1
regulation of collateral sprouting of injured axon (GO:0048693)	2	1	0.05	+	21.33	0.0672	0.697	Cluster 1
chemorepulsion of dopaminergic neuron axon (GO:0036518)	2	1	0.05	+	21.33	0.0672	0.696	Cluster 1
positive regulation of protein localization to endoplasmic reticulum (GO:1905552)	2	1	0.05	+	21.33	0.0672	0.696	Cluster 1
regulation of protein localization to endoplasmic reticulum (GO:1905550)	2	1	0.05	+	21.33	0.0672	0.696	Cluster 1
regulation of Golgi lumen acidification (GO:1905526)	2	1	0.05	+	21.33	0.0672	0.695	Cluster 1
inorganic anion import across plasma membrane (GO:0098658)	2	1	0.05	+	21.33	0.0672	0.695	Cluster 1
positive regulation of histone H3-K4 trimethylation (GO:1905437)	2	1	0.05	+	21.33	0.0672	0.694	Cluster 1
regulation of histone H3-K4 trimethylation (GO:1905435)	2	1	0.05	+	21.33	0.0672	0.694	Cluster 1
response to glycine (GO:1905429)	2	1	0.05	+	21.33	0.0672	0.693	Cluster 1
protein localization to T-tubule (GO:0036371)	2	1	0.05	+	21.33	0.0672	0.693	Cluster 1
regulation of cell proliferation in midbrain (GO:1904933)	2	1	0.05	+	21.33	0.0672	0.692	Cluster 1
negative regulation of maintenance of mitotic sister chromatid cohesion, telomeric (GO:1904908)	2	1	0.05	+	21.33	0.0672	0.692	Cluster 1
regulation of maintenance of mitotic sister chromatid cohesion, telomeric (GO:1904907)	2	1	0.05	+	21.33	0.0672	0.691	Cluster 1
innate vocalization behavior (GO:0098582)	2	1	0.05	+	21.33	0.0672	0.691	Cluster 1
adrenal cortex formation (GO:0035802)	2	1	0.05	+	21.33	0.0672	0.691	Cluster 1
negative regulation of calcium ion transmembrane transport via high voltage-gated calcium channel (GO:1904878)	2	1	0.05	+	21.33	0.0672	0.69	Cluster 1
hepatic stellate cell activation (GO:0035733)	2	1	0.05	+	21.33	0.0672	0.69	Cluster 1
negative regulation of cardiac muscle tissue regeneration (GO:1905179)	2	1	0.05	+	21.33	0.0672	0.689	Cluster 1
regulation of cardiac muscle tissue regeneration (GO:1905178)	2	1	0.05	+	21.33	0.0672	0.689	Cluster 1
histidine biosynthetic process (GO:0000105)	2	1	0.05	+	21.33	0.0672	0.688	Cluster 1
pseudopodium assembly (GO:0031269)	2	1	0.05	+	21.33	0.0672	0.688	Cluster 1
peptide modification (GO:0031179)	2	1	0.05	+	21.33	0.0672	0.687	Cluster 1
endosome membrane tubulation (GO:0097750)	2	1	0.05	+	21.33	0.0672	0.687	Cluster 1
regulation of actin filament binding (GO:1904529)	2	1	0.05	+	21.33	0.0672	0.687	Cluster 1
negative regulation of microtubule binding (GO:1904527)	2	1	0.05	+	21.33	0.0672	0.686	Cluster 1
histone H3-T6 phosphorylation (GO:0035408)	2	1	0.05	+	21.33	0.0672	0.686	Cluster 1
serine phosphorylation of STAT protein (GO:0042501)	4	2	0.09	+	21.33	0.00739	0.176	Cluster 1
intrinsic apoptotic signaling pathway in response to osmotic stress (GO:0008627)	2	1	0.05	+	21.33	0.0672	0.685	Cluster 1
lymphoid lineage cell migration into thymus (GO:0097535)	2	1	0.05	+	21.33	0.0672	0.685	Cluster 1
lymphoid lineage cell migration (GO:0097534)	2	1	0.05	+	21.33	0.0672	0.684	Cluster 1
negative regulation of deacetylase activity (GO:0150066)	2	1	0.05	+	21.33	0.0672	0.684	Cluster 1
thiamine diphosphate metabolic process (GO:0042357)	2	1	0.05	+	21.33	0.0672	0.683	Cluster 1
positive regulation of anterograde synaptic vesicle transport (GO:1903744)	2	1	0.05	+	21.33	0.0672	0.683	Cluster 1
optic placode formation involved in camera-type eye formation (GO:0046619)	2	1	0.05	+	21.33	0.0672	0.683	Cluster 1
melanocyte migration (GO:0097324)	2	1	0.05	+	21.33	0.0672	0.682	Cluster 1
closure of optic fissure (GO:0061386)	2	1	0.05	+	21.33	0.0672	0.682	Cluster 1
mammillary axonal complex development (GO:0061373)	2	1	0.05	+	21.33	0.0672	0.681	Cluster 1
Wnt protein secretion (GO:0061355)	2	1	0.05	+	21.33	0.0672	0.681	Cluster 1
planar cell polarity pathway involved in heart morphogenesis (GO:0061346)	2	1	0.05	+	21.33	0.0672	0.68	Cluster 1
non-canonical Wnt signaling pathway involved in heart development (GO:0061341)	2	1	0.05	+	21.33	0.0672	0.68	Cluster 1
regulation of transcription involved in lymphatic endothelial cell fate commitment (GO:0060849)	2	1	0.05	+	21.33	0.0672	0.68	Cluster 1
mesodermal to mesenchymal transition involved in gastrulation (GO:0060809)	2	1	0.05	+	21.33	0.0672	0.679	Cluster 1
negative regulation of spontaneous neurotransmitter secretion (GO:1904049)	2	1	0.05	+	21.33	0.0672	0.679	Cluster 1
negative regulation of G protein-coupled receptor internalization (GO:1904021)	2	1	0.05	+	21.33	0.0672	0.678	Cluster 1
planar cell polarity pathway involved in gastrula mediolateral intercalation (GO:0060775)	2	1	0.05	+	21.33	0.0672	0.678	Cluster 1
neuroligin clustering involved in postsynaptic membrane assembly (GO:0097118)	4	2	0.09	+	21.33	0.00739	0.175	Cluster 1
cerebellar granule cell precursor tangential migration (GO:0021935)	2	1	0.05	+	21.33	0.0672	0.677	Cluster 1
ultradian rhythm (GO:0007624)	2	1	0.05	+	21.33	0.0672	0.677	Cluster 1
cardiac right atrium morphogenesis (GO:0003213)	2	1	0.05	+	21.33	0.0672	0.676	Cluster 1
positive regulation of single stranded viral RNA replication via double stranded DNA intermediate (GO:0045870)	2	1	0.05	+	21.33	0.0672	0.676	Cluster 1
positive regulation of adherens junction organization (GO:1903393)	2	1	0.05	+	21.33	0.0672	0.676	Cluster 1
chemorepulsion involved in postnatal olfactory bulb interneuron migration (GO:0021836)	2	1	0.05	+	21.33	0.0672	0.675	Cluster 1
embryonic olfactory bulb interneuron precursor migration (GO:0021831)	2	1	0.05	+	21.33	0.0672	0.675	Cluster 1
lateral sprouting involved in mammary gland duct morphogenesis (GO:0060599)	2	1	0.05	+	21.33	0.0672	0.674	Cluster 1
regulation of postsynaptic density protein 95 clustering (GO:1902897)	4	2	0.09	+	21.33	0.00739	0.175	Cluster 1
regulation of amacrine cell differentiation (GO:1902869)	4	2	0.09	+	21.33	0.00739	0.175	Cluster 1
positive regulation of synaptic vesicle transport (GO:1902805)	2	1	0.05	+	21.33	0.0672	0.674	Cluster 1
spontaneous synaptic transmission (GO:0098814)	11	5	0.26	+	19.39	2.19e-05	0.00135	Cluster 1
modulation of inhibitory postsynaptic potential (GO:0098828)	9	4	0.21	+	18.96	0.000165	0.00774	Cluster 1
spontaneous neurotransmitter secretion (GO:0061669)	9	4	0.21	+	18.96	0.000165	0.00772	Cluster 1
olfactory bulb interneuron development (GO:0021891)	9	4	0.21	+	18.96	0.000165	0.00769	Cluster 1
anterograde dendritic transport (GO:0098937)	7	3	0.16	+	18.28	0.00127	0.0445	Cluster 1
positive regulation of artery morphogenesis (GO:1905653)	7	3	0.16	+	18.28	0.00127	0.0444	Cluster 1
positive regulation of protein localization to centrosome (GO:1904781)	7	3	0.16	+	18.28	0.00127	0.0443	Cluster 1
radial glia guided migration of Purkinje cell (GO:0021942)	7	3	0.16	+	18.28	0.00127	0.0442	Cluster 1
soft palate development (GO:0060023)	5	2	0.12	+	17.06	0.0102	0.22	Cluster 1
regulation of postsynaptic cytosolic calcium ion concentration (GO:0099566)	5	2	0.12	+	17.06	0.0102	0.22	Cluster 1
branching morphogenesis of a nerve (GO:0048755)	5	2	0.12	+	17.06	0.0102	0.219	Cluster 1
negative regulation of collateral sprouting (GO:0048671)	10	4	0.23	+	17.06	0.000227	0.0101	Cluster 1
positive regulation of focal adhesion disassembly (GO:0120183)	5	2	0.12	+	17.06	0.0102	0.219	Cluster 1
regulation of focal adhesion disassembly (GO:0120182)	5	2	0.12	+	17.06	0.0102	0.219	Cluster 1
positive regulation of Notch signaling pathway involved in heart induction (GO:0035481)	5	2	0.12	+	17.06	0.0102	0.218	Cluster 1
regulation of Notch signaling pathway involved in heart induction (GO:0035480)	5	2	0.12	+	17.06	0.0102	0.218	Cluster 1
axon midline choice point recognition (GO:0016199)	5	2	0.12	+	17.06	0.0102	0.218	Cluster 1
negative regulation of dendrite extension (GO:1903860)	5	2	0.12	+	17.06	0.0102	0.217	Cluster 1
positive regulation of Rac protein signal transduction (GO:0035022)	5	2	0.12	+	17.06	0.0102	0.217	Cluster 1
negative regulation of dendritic spine maintenance (GO:1902951)	5	2	0.12	+	17.06	0.0102	0.217	Cluster 1
olfactory bulb interneuron differentiation (GO:0021889)	15	6	0.35	+	17.06	5.69e-06	0.000404	Cluster 1
positive regulation of synaptic vesicle clustering (GO:2000809)	8	3	0.19	+	15.99	0.00172	0.057	Cluster 1
negative regulation of mesenchymal cell proliferation (GO:0072201)	8	3	0.19	+	15.99	0.00172	0.0569	Cluster 1
cellular response to histamine (GO:0071420)	8	3	0.19	+	15.99	0.00172	0.0568	Cluster 1
positive regulation of heart induction (GO:1901321)	8	3	0.19	+	15.99	0.00172	0.0567	Cluster 1
regulation of artery morphogenesis (GO:1905651)	8	3	0.19	+	15.99	0.00172	0.0566	Cluster 1
histone H3-K4 demethylation (GO:0034720)	8	3	0.19	+	15.99	0.00172	0.0565	Cluster 1
positive regulation of inhibitory postsynaptic potential (GO:0097151)	8	3	0.19	+	15.99	0.00172	0.0563	Cluster 1
inhibitory synapse assembly (GO:1904862)	11	4	0.26	+	15.51	0.000304	0.0132	Cluster 1
branchiomotor neuron axon guidance (GO:0021785)	6	2	0.14	+	14.22	0.0134	0.269	Cluster 1
negative regulation of maintenance of mitotic sister chromatid cohesion (GO:0034183)	3	1	0.07	+	14.22	0.0885	0.816	Cluster 1
aorta smooth muscle tissue morphogenesis (GO:0060414)	3	1	0.07	+	14.22	0.0885	0.816	Cluster 1
negative regulation of toll-like receptor 9 signaling pathway (GO:0034164)	3	1	0.07	+	14.22	0.0885	0.815	Cluster 1
cerebellar cortex maturation (GO:0021699)	3	1	0.07	+	14.22	0.0885	0.815	Cluster 1
positive regulation of growth hormone receptor signaling pathway (GO:0060399)	3	1	0.07	+	14.22	0.0885	0.814	Cluster 1
regulation of estradiol secretion (GO:2000864)	3	1	0.07	+	14.22	0.0885	0.814	Cluster 1
guanine metabolic process (GO:0046098)	3	1	0.07	+	14.22	0.0885	0.813	Cluster 1
negative regulation of maintenance of sister chromatid cohesion (GO:0034092)	3	1	0.07	+	14.22	0.0885	0.813	Cluster 1
cytoplasmic actin-based contraction involved in cell motility (GO:0060327)	3	1	0.07	+	14.22	0.0885	0.812	Cluster 1
response to norepinephrine (GO:0071873)	3	1	0.07	+	14.22	0.0885	0.812	Cluster 1
regulation of semaphorin-plexin signaling pathway (GO:2001260)	3	1	0.07	+	14.22	0.0885	0.812	Cluster 1
pons maturation (GO:0021586)	3	1	0.07	+	14.22	0.0885	0.811	Cluster 1
vagus nerve development (GO:0021564)	3	1	0.07	+	14.22	0.0885	0.811	Cluster 1
regulation of dense core granule biogenesis (GO:2000705)	3	1	0.07	+	14.22	0.0885	0.81	Cluster 1
thiamine metabolic process (GO:0006772)	3	1	0.07	+	14.22	0.0885	0.81	Cluster 1
positive regulation of cardiac muscle myoblast proliferation (GO:0110024)	3	1	0.07	+	14.22	0.0885	0.809	Cluster 1
regulation of cardiac muscle myoblast proliferation (GO:0110022)	3	1	0.07	+	14.22	0.0885	0.809	Cluster 1
olfactory pit development (GO:0060166)	3	1	0.07	+	14.22	0.0885	0.808	Cluster 1
cardiac muscle thin filament assembly (GO:0071691)	3	1	0.07	+	14.22	0.0885	0.808	Cluster 1
short-term synaptic potentiation (GO:1990926)	3	1	0.07	+	14.22	0.0885	0.807	Cluster 1
positive regulation of anterograde dense core granule transport (GO:1901953)	3	1	0.07	+	14.22	0.0885	0.807	Cluster 1
regulation of anterograde dense core granule transport (GO:1901951)	3	1	0.07	+	14.22	0.0885	0.806	Cluster 1
thyroid hormone mediated signaling pathway (GO:0002154)	3	1	0.07	+	14.22	0.0885	0.806	Cluster 1
genetic imprinting at mating-type locus (GO:0071515)	3	1	0.07	+	14.22	0.0885	0.805	Cluster 1
inter-male aggressive behavior (GO:0002121)	3	1	0.07	+	14.22	0.0885	0.805	Cluster 1
regulation of cell communication by electrical coupling involved in cardiac conduction (GO:1901844)	3	1	0.07	+	14.22	0.0885	0.805	Cluster 1
gamma-aminobutyric acid secretion (GO:0014051)	6	2	0.14	+	14.22	0.0134	0.269	Cluster 1
mitochondrial depolarization (GO:0051882)	3	1	0.07	+	14.22	0.0885	0.804	Cluster 1
negative regulation of ectoderm development (GO:2000384)	3	1	0.07	+	14.22	0.0885	0.804	Cluster 1
regulation of ectoderm development (GO:2000383)	3	1	0.07	+	14.22	0.0885	0.803	Cluster 1
regulation of kainate selective glutamate receptor activity (GO:2000312)	3	1	0.07	+	14.22	0.0885	0.803	Cluster 1
peptidyl-glutamate ADP-deribosylation (GO:0140291)	3	1	0.07	+	14.22	0.0885	0.802	Cluster 1
endosome fission (GO:0140285)	3	1	0.07	+	14.22	0.0885	0.802	Cluster 1
negative regulation of bile acid biosynthetic process (GO:0070858)	3	1	0.07	+	14.22	0.0885	0.801	Cluster 1
negative regulation of locomotion involved in locomotory behavior (GO:0090327)	3	1	0.07	+	14.22	0.0885	0.801	Cluster 1
hypophysis morphogenesis (GO:0048850)	3	1	0.07	+	14.22	0.0885	0.8	Cluster 1
regulation of Ral protein signal transduction (GO:0032485)	3	1	0.07	+	14.22	0.0885	0.8	Cluster 1
presynaptic dense core vesicle exocytosis (GO:0099525)	6	2	0.14	+	14.22	0.0134	0.268	Cluster 1
dendritic transport of messenger ribonucleoprotein complex (GO:0098963)	6	2	0.14	+	14.22	0.0134	0.268	Cluster 1
dendritic transport of ribonucleoprotein complex (GO:0098961)	6	2	0.14	+	14.22	0.0134	0.268	Cluster 1
membrane depolarization during atrial cardiac muscle cell action potential (GO:0098912)	3	1	0.07	+	14.22	0.0885	0.799	Cluster 1
negative regulation of sprouting of injured axon (GO:0048688)	3	1	0.07	+	14.22	0.0885	0.799	Cluster 1
positive regulation of inflammatory response to wounding (GO:0106016)	3	1	0.07	+	14.22	0.0885	0.799	Cluster 1
regulation of plasma membrane repair (GO:1905684)	3	1	0.07	+	14.22	0.0885	0.798	Cluster 1
negative regulation of thrombin-activated receptor signaling pathway (GO:0070495)	3	1	0.07	+	14.22	0.0885	0.798	Cluster 1
regulation of thrombin-activated receptor signaling pathway (GO:0070494)	3	1	0.07	+	14.22	0.0885	0.797	Cluster 1
cellular response to trichostatin A (GO:0035984)	3	1	0.07	+	14.22	0.0885	0.797	Cluster 1
response to trichostatin A (GO:0035983)	3	1	0.07	+	14.22	0.0885	0.796	Cluster 1
neuronal dense core vesicle exocytosis (GO:0099011)	6	2	0.14	+	14.22	0.0134	0.267	Cluster 1
regulation of mating type switching (GO:0031494)	3	1	0.07	+	14.22	0.0885	0.796	Cluster 1
snRNA transport (GO:0051030)	3	1	0.07	+	14.22	0.0885	0.795	Cluster 1
adrenal cortex development (GO:0035801)	3	1	0.07	+	14.22	0.0885	0.795	Cluster 1
gamma-aminobutyric acid biosynthetic process (GO:0009449)	3	1	0.07	+	14.22	0.0885	0.794	Cluster 1
catecholamine secretion (GO:0050432)	3	1	0.07	+	14.22	0.0885	0.794	Cluster 1
regulation of protein K48-linked ubiquitination (GO:0061945)	3	1	0.07	+	14.22	0.0885	0.794	Cluster 1
thiamine-containing compound metabolic process (GO:0042723)	3	1	0.07	+	14.22	0.0885	0.793	Cluster 1
regulation of actin binding (GO:1904616)	3	1	0.07	+	14.22	0.0885	0.793	Cluster 1
positive regulation of mini excitatory postsynaptic potential (GO:0061885)	3	1	0.07	+	14.22	0.0885	0.792	Cluster 1
asymmetric neuroblast division (GO:0055059)	6	2	0.14	+	14.22	0.0134	0.267	Cluster 1
ventricular cardiac myofibril assembly (GO:0055005)	3	1	0.07	+	14.22	0.0885	0.792	Cluster 1
heterochromatin assembly by small RNA (GO:0031048)	3	1	0.07	+	14.22	0.0885	0.791	Cluster 1
sensitization (GO:0046960)	3	1	0.07	+	14.22	0.0885	0.791	Cluster 1
negative regulation of ruffle assembly (GO:1900028)	6	2	0.14	+	14.22	0.0134	0.267	Cluster 1
chemorepulsion of axon (GO:0061643)	6	2	0.14	+	14.22	0.0134	0.266	Cluster 1
aromatic amino acid family biosynthetic process (GO:0009073)	3	1	0.07	+	14.22	0.0885	0.79	Cluster 1
negative regulation of neuromuscular junction development (GO:1904397)	3	1	0.07	+	14.22	0.0885	0.79	Cluster 1
negative regulation of dopaminergic neuron differentiation (GO:1904339)	3	1	0.07	+	14.22	0.0885	0.79	Cluster 1
calcium ion transmembrane transport via high voltage-gated calcium channel (GO:0061577)	3	1	0.07	+	14.22	0.0885	0.789	Cluster 1
negative regulation of bile acid metabolic process (GO:1904252)	3	1	0.07	+	14.22	0.0885	0.789	Cluster 1
regulation of primitive erythrocyte differentiation (GO:0010725)	3	1	0.07	+	14.22	0.0885	0.788	Cluster 1
regulation of anterograde synaptic vesicle transport (GO:1903742)	3	1	0.07	+	14.22	0.0885	0.788	Cluster 1
response to pyrethroid (GO:0046684)	3	1	0.07	+	14.22	0.0885	0.787	Cluster 1
negative regulation of adipose tissue development (GO:1904178)	3	1	0.07	+	14.22	0.0885	0.787	Cluster 1
melanocyte proliferation (GO:0097325)	3	1	0.07	+	14.22	0.0885	0.786	Cluster 1
cell communication by chemical coupling (GO:0010643)	3	1	0.07	+	14.22	0.0885	0.786	Cluster 1
behavioral response to formalin induced pain (GO:0061368)	3	1	0.07	+	14.22	0.0885	0.786	Cluster 1
behavioral response to chemical pain (GO:0061366)	3	1	0.07	+	14.22	0.0885	0.785	Cluster 1
positive regulation of Wnt protein secretion (GO:0061357)	3	1	0.07	+	14.22	0.0885	0.785	Cluster 1
lymphatic endothelial cell fate commitment (GO:0060838)	3	1	0.07	+	14.22	0.0885	0.784	Cluster 1
planar cell polarity pathway involved in axis elongation (GO:0003402)	3	1	0.07	+	14.22	0.0885	0.784	Cluster 1
regulation of spontaneous neurotransmitter secretion (GO:1904048)	3	1	0.07	+	14.22	0.0885	0.783	Cluster 1
cellular response to Thyroglobulin triiodothyronine (GO:1904017)	3	1	0.07	+	14.22	0.0885	0.783	Cluster 1
response to Thyroglobulin triiodothyronine (GO:1904016)	3	1	0.07	+	14.22	0.0885	0.782	Cluster 1
noradrenergic neuron differentiation (GO:0003357)	6	2	0.14	+	14.22	0.0134	0.266	Cluster 1
cellular response to staurosporine (GO:0072734)	3	1	0.07	+	14.22	0.0885	0.782	Cluster 1
response to staurosporine (GO:0072733)	3	1	0.07	+	14.22	0.0885	0.782	Cluster 1
positive regulation of female receptivity (GO:0045925)	6	2	0.14	+	14.22	0.0134	0.266	Cluster 1
anterior commissure morphogenesis (GO:0021960)	6	2	0.14	+	14.22	0.0134	0.265	Cluster 1
protein localization to cell cortex (GO:0072697)	3	1	0.07	+	14.22	0.0885	0.781	Cluster 1
hindbrain tangential cell migration (GO:0021934)	3	1	0.07	+	14.22	0.0885	0.781	Cluster 1
female courtship behavior (GO:0008050)	3	1	0.07	+	14.22	0.0885	0.78	Cluster 1
positive regulation of synaptic growth at neuromuscular junction (GO:0045887)	3	1	0.07	+	14.22	0.0885	0.78	Cluster 1
cardiac muscle tissue regeneration (GO:0061026)	3	1	0.07	+	14.22	0.0885	0.779	Cluster 1
pyramidal neuron migration (GO:0021852)	3	1	0.07	+	14.22	0.0885	0.779	Cluster 1
postnatal olfactory bulb interneuron migration (GO:0021827)	3	1	0.07	+	14.22	0.0885	0.779	Cluster 1
substrate-dependent cerebral cortex tangential migration (GO:0021825)	3	1	0.07	+	14.22	0.0885	0.778	Cluster 1
cerebral cortex tangential migration using cell-cell interactions (GO:0021823)	3	1	0.07	+	14.22	0.0885	0.778	Cluster 1
primary heart field specification (GO:0003138)	3	1	0.07	+	14.22	0.0885	0.777	Cluster 1
tangential migration from the subventricular zone to the olfactory bulb (GO:0022028)	9	3	0.21	+	14.22	0.00225	0.0715	Cluster 1
negative regulation of microtubule polymerization (GO:0031115)	15	5	0.35	+	14.22	7.22e-05	0.00386	Cluster 1
sialylation (GO:0097503)	9	3	0.21	+	14.22	0.00225	0.0713	Cluster 1
synaptic vesicle clustering (GO:0097091)	9	3	0.21	+	14.22	0.00225	0.0712	Cluster 1
regulation of retina development in camera-type eye (GO:1902866)	9	3	0.21	+	14.22	0.00225	0.071	Cluster 1
negative regulation of neuron migration (GO:2001223)	13	4	0.3	+	13.12	0.000511	0.0209	Cluster 1
ganglioside biosynthetic process (GO:0001574)	13	4	0.3	+	13.12	0.000511	0.0209	Cluster 1
regulation of neuron projection arborization (GO:0150011)	13	4	0.3	+	13.12	0.000511	0.0208	Cluster 1
regulation of synaptic vesicle clustering (GO:2000807)	10	3	0.23	+	12.8	0.00288	0.0875	Cluster 1
regulation of heart induction (GO:0090381)	10	3	0.23	+	12.8	0.00288	0.0873	Cluster 1
modification of postsynaptic actin cytoskeleton (GO:0098885)	10	3	0.23	+	12.8	0.00288	0.0871	Cluster 1
positive regulation of extracellular matrix disassembly (GO:0090091)	10	3	0.23	+	12.8	0.00288	0.087	Cluster 1
synaptic vesicle priming (GO:0016082)	20	6	0.47	+	12.8	2.19e-05	0.00136	Cluster 1
negative regulation of cell maturation (GO:1903430)	10	3	0.23	+	12.8	0.00288	0.0868	Cluster 1
negative regulation of microtubule depolymerization (GO:0007026)	35	10	0.82	+	12.19	5.67e-08	5.89e-06	Cluster 1
regulation of melanocyte differentiation (GO:0045634)	7	2	0.16	+	12.19	0.0169	0.317	Cluster 1
hindbrain maturation (GO:0021578)	7	2	0.16	+	12.19	0.0169	0.316	Cluster 1
regulation of relaxation of cardiac muscle (GO:1901897)	7	2	0.16	+	12.19	0.0169	0.316	Cluster 1
clustering of voltage-gated sodium channels (GO:0045162)	7	2	0.16	+	12.19	0.0169	0.316	Cluster 1
imitative learning (GO:0098596)	7	2	0.16	+	12.19	0.0169	0.315	Cluster 1
regulation of voltage-gated sodium channel activity (GO:1905150)	7	2	0.16	+	12.19	0.0169	0.315	Cluster 1
axon choice point recognition (GO:0016198)	7	2	0.16	+	12.19	0.0169	0.315	Cluster 1
positive regulation of neuron projection arborization (GO:0150012)	7	2	0.16	+	12.19	0.0169	0.314	Cluster 1
vocal learning (GO:0042297)	7	2	0.16	+	12.19	0.0169	0.314	Cluster 1
negative regulation of photoreceptor cell differentiation (GO:0046533)	7	2	0.16	+	12.19	0.0169	0.313	Cluster 1
negative regulation of epithelial cell proliferation involved in prostate gland development (GO:0060770)	7	2	0.16	+	12.19	0.0169	0.313	Cluster 1
mammary duct terminal end bud growth (GO:0060763)	7	2	0.16	+	12.19	0.0169	0.313	Cluster 1
cerebral cortex tangential migration (GO:0021800)	7	2	0.16	+	12.19	0.0169	0.312	Cluster 1
type I pneumocyte differentiation (GO:0060509)	7	2	0.16	+	12.19	0.0169	0.312	Cluster 1
limb bud formation (GO:0060174)	11	3	0.26	+	11.63	0.0036	0.101	Cluster 1
cellular response to antibiotic (GO:0071236)	11	3	0.26	+	11.63	0.0036	0.101	Cluster 1
regulation of protein localization to centrosome (GO:1904779)	11	3	0.26	+	11.63	0.0036	0.101	Cluster 1
gamma-aminobutyric acid transport (GO:0015812)	11	3	0.26	+	11.63	0.0036	0.1	Cluster 1
atrial cardiac muscle cell to AV node cell signaling (GO:0086026)	11	3	0.26	+	11.63	0.0036	0.1	Cluster 1
atrial cardiac muscle cell action potential (GO:0086014)	11	3	0.26	+	11.63	0.0036	0.1	Cluster 1
regulation of synaptic vesicle priming (GO:0010807)	11	3	0.26	+	11.63	0.0036	0.0999	Cluster 1
response to histamine (GO:0034776)	11	3	0.26	+	11.63	0.0036	0.0997	Cluster 1
cerebral cortex GABAergic interneuron differentiation (GO:0021892)	11	3	0.26	+	11.63	0.0036	0.0995	Cluster 1
negative regulation of microtubule polymerization or depolymerization (GO:0031111)	48	13	1.13	+	11.55	9.93e-10	1.24e-07	Cluster 1
regulation of microtubule depolymerization (GO:0031114)	38	10	0.89	+	11.22	1.09e-07	1.05e-05	Cluster 1
calcium ion-regulated exocytosis of neurotransmitter (GO:0048791)	23	6	0.54	+	11.13	4.26e-05	0.00243	Cluster 1
positive regulation of dendritic spine morphogenesis (GO:0061003)	27	7	0.63	+	11.06	1e-05	0.000678	Cluster 1
positive regulation of synaptic vesicle exocytosis (GO:2000302)	12	3	0.28	+	10.66	0.00443	0.12	Cluster 1
dendritic transport (GO:0098935)	12	3	0.28	+	10.66	0.00443	0.12	Cluster 1
regulation of collateral sprouting (GO:0048670)	24	6	0.56	+	10.66	5.22e-05	0.00291	Cluster 1
atrial cardiac muscle cell to AV node cell communication (GO:0086066)	12	3	0.28	+	10.66	0.00443	0.119	Cluster 1
synaptic vesicle docking (GO:0016081)	12	3	0.28	+	10.66	0.00443	0.119	Cluster 1
regulation of calcium ion-dependent exocytosis of neurotransmitter (GO:1903233)	4	1	0.09	+	10.66	0.109	0.903	Cluster 1
club cell differentiation (GO:0060486)	4	1	0.09	+	10.66	0.109	0.902	Cluster 1
axon target recognition (GO:0007412)	4	1	0.09	+	10.66	0.109	0.902	Cluster 1
positive regulation of mammary gland epithelial cell proliferation (GO:0033601)	8	2	0.19	+	10.66	0.0209	0.366	Cluster 1
central nervous system maturation (GO:0021626)	8	2	0.19	+	10.66	0.0209	0.365	Cluster 1
glossopharyngeal nerve morphogenesis (GO:0021615)	4	1	0.09	+	10.66	0.109	0.901	Cluster 1
positive regulation of receptor localization to synapse (GO:1902685)	4	1	0.09	+	10.66	0.109	0.901	Cluster 1
regulation of T cell homeostatic proliferation (GO:0046013)	4	1	0.09	+	10.66	0.109	0.9	Cluster 1
positive regulation of caveolin-mediated endocytosis (GO:2001288)	4	1	0.09	+	10.66	0.109	0.9	Cluster 1
dorsal/ventral axon guidance (GO:0033563)	4	1	0.09	+	10.66	0.109	0.9	Cluster 1
cerebellum maturation (GO:0021590)	4	1	0.09	+	10.66	0.109	0.899	Cluster 1
vitellogenesis (GO:0007296)	4	1	0.09	+	10.66	0.109	0.899	Cluster 1
JUN phosphorylation (GO:0007258)	4	1	0.09	+	10.66	0.109	0.898	Cluster 1
Wnt signaling pathway, calcium modulating pathway (GO:0007223)	4	1	0.09	+	10.66	0.109	0.898	Cluster 1
endocardium formation (GO:0060214)	4	1	0.09	+	10.66	0.109	0.897	Cluster 1
positive regulation of protein monoubiquitination (GO:1902527)	4	1	0.09	+	10.66	0.109	0.897	Cluster 1
positive regulation of protein K63-linked ubiquitination (GO:1902523)	4	1	0.09	+	10.66	0.109	0.896	Cluster 1
adenylate cyclase-inhibiting G protein-coupled glutamate receptor signaling pathway (GO:0007196)	4	1	0.09	+	10.66	0.109	0.896	Cluster 1
regulation of muscle filament sliding (GO:0032971)	4	1	0.09	+	10.66	0.109	0.895	Cluster 1
negative regulation of growth hormone secretion (GO:0060125)	4	1	0.09	+	10.66	0.109	0.895	Cluster 1
regulation of male mating behavior (GO:1902435)	4	1	0.09	+	10.66	0.109	0.894	Cluster 1
regulation of transforming growth factor beta3 production (GO:0032910)	4	1	0.09	+	10.66	0.109	0.894	Cluster 1
epithelial cell proliferation involved in renal tubule morphogenesis (GO:2001013)	4	1	0.09	+	10.66	0.109	0.894	Cluster 1
smooth muscle contraction involved in micturition (GO:0060083)	4	1	0.09	+	10.66	0.109	0.893	Cluster 1
nodal signaling pathway involved in determination of left/right asymmetry (GO:0038107)	4	1	0.09	+	10.66	0.109	0.893	Cluster 1
negative regulation of synapse assembly (GO:0051964)	8	2	0.19	+	10.66	0.0209	0.365	Cluster 1
desmosome assembly (GO:0002159)	4	1	0.09	+	10.66	0.109	0.892	Cluster 1
gamma-aminobutyric acid import (GO:0051939)	4	1	0.09	+	10.66	0.109	0.892	Cluster 1
endoplasmic reticulum tubular network membrane organization (GO:1990809)	4	1	0.09	+	10.66	0.109	0.891	Cluster 1
negative regulation of transcription of nucleolar large rRNA by RNA polymerase I (GO:1901837)	4	1	0.09	+	10.66	0.109	0.891	Cluster 1
pericentric heterochromatin organization (GO:0140462)	4	1	0.09	+	10.66	0.109	0.89	Cluster 1
positive regulation of delayed rectifier potassium channel activity (GO:1902261)	4	1	0.09	+	10.66	0.109	0.89	Cluster 1
netrin-activated signaling pathway (GO:0038007)	8	2	0.19	+	10.66	0.0209	0.365	Cluster 1
clustering of voltage-gated potassium channels (GO:0045163)	4	1	0.09	+	10.66	0.109	0.889	Cluster 1
presynaptic active zone organization (GO:1990709)	4	1	0.09	+	10.66	0.109	0.889	Cluster 1
regulation of terminal button organization (GO:2000331)	4	1	0.09	+	10.66	0.109	0.888	Cluster 1
atrial cardiac muscle cell membrane repolarization (GO:0099624)	4	1	0.09	+	10.66	0.109	0.888	Cluster 1
membrane raft localization (GO:0051665)	4	1	0.09	+	10.66	0.109	0.888	Cluster 1
dense core granule exocytosis (GO:1990504)	8	2	0.19	+	10.66	0.0209	0.364	Cluster 1
positive regulation of anion channel activity (GO:1901529)	4	1	0.09	+	10.66	0.109	0.887	Cluster 1
negative regulation of branching morphogenesis of a nerve (GO:2000173)	4	1	0.09	+	10.66	0.109	0.887	Cluster 1
otolith morphogenesis (GO:0032474)	4	1	0.09	+	10.66	0.109	0.886	Cluster 1
positive regulation of 3'-UTR-mediated mRNA stabilization (GO:1905870)	4	1	0.09	+	10.66	0.109	0.886	Cluster 1
positive regulation of osteoclast proliferation (GO:0090290)	4	1	0.09	+	10.66	0.109	0.885	Cluster 1
regulation of centromere complex assembly (GO:0090230)	4	1	0.09	+	10.66	0.109	0.885	Cluster 1
dendrite arborization (GO:0140059)	8	2	0.19	+	10.66	0.0209	0.364	Cluster 1
positive regulation of cell-cell adhesion mediated by cadherin (GO:2000049)	8	2	0.19	+	10.66	0.0209	0.363	Cluster 1
canonical Wnt signaling pathway involved in negative regulation of apoptotic process (GO:0044336)	4	1	0.09	+	10.66	0.109	0.884	Cluster 1
cell-cell adhesion mediated by cadherin (GO:0044331)	8	2	0.19	+	10.66	0.0209	0.363	Cluster 1
membrane repolarization during atrial cardiac muscle cell action potential (GO:0098914)	4	1	0.09	+	10.66	0.109	0.884	Cluster 1
regulation of AV node cell action potential (GO:0098904)	4	1	0.09	+	10.66	0.109	0.883	Cluster 1
detection of temperature stimulus involved in thermoception (GO:0050960)	4	1	0.09	+	10.66	0.109	0.883	Cluster 1
negative regulation of inflammatory response to wounding (GO:0106015)	4	1	0.09	+	10.66	0.109	0.883	Cluster 1
positive regulation of heart induction by negative regulation of canonical Wnt signaling pathway (GO:0090082)	4	1	0.09	+	10.66	0.109	0.882	Cluster 1
positive regulation of microtubule nucleation (GO:0090063)	4	1	0.09	+	10.66	0.109	0.882	Cluster 1
serotonergic neuron axon guidance (GO:0036515)	4	1	0.09	+	10.66	0.109	0.881	Cluster 1
hypermethylation of CpG island (GO:0044027)	4	1	0.09	+	10.66	0.109	0.881	Cluster 1
positive regulation of clathrin coat assembly (GO:1905445)	4	1	0.09	+	10.66	0.109	0.88	Cluster 1
regulation of clathrin coat assembly (GO:1905443)	4	1	0.09	+	10.66	0.109	0.88	Cluster 1
ascending aorta morphogenesis (GO:0035910)	4	1	0.09	+	10.66	0.109	0.879	Cluster 1
pericentric heterochromatin assembly (GO:0031508)	4	1	0.09	+	10.66	0.109	0.879	Cluster 1
re-entry into mitotic cell cycle (GO:0000320)	4	1	0.09	+	10.66	0.109	0.879	Cluster 1
positive regulation of calcium ion transmembrane transport via high voltage-gated calcium channel (GO:1904879)	4	1	0.09	+	10.66	0.109	0.878	Cluster 1
positive regulation of dense core granule transport (GO:1904811)	4	1	0.09	+	10.66	0.109	0.878	Cluster 1
negative regulation of protein localization to centrosome (GO:1904780)	4	1	0.09	+	10.66	0.109	0.877	Cluster 1
negative regulation of secondary metabolite biosynthetic process (GO:1900377)	4	1	0.09	+	10.66	0.109	0.877	Cluster 1
pseudopodium organization (GO:0031268)	4	1	0.09	+	10.66	0.109	0.876	Cluster 1
positive regulation of transcription from RNA polymerase II promoter in response to oxidative stress (GO:0036091)	4	1	0.09	+	10.66	0.109	0.876	Cluster 1
negative regulation of melanin biosynthetic process (GO:0048022)	4	1	0.09	+	10.66	0.109	0.875	Cluster 1
regulation of mini excitatory postsynaptic potential (GO:0061884)	4	1	0.09	+	10.66	0.109	0.875	Cluster 1
positive regulation of microtubule depolymerization (GO:0031117)	4	1	0.09	+	10.66	0.109	0.875	Cluster 1
membrane tubulation (GO:0097749)	4	1	0.09	+	10.66	0.109	0.874	Cluster 1
negative regulation of clathrin-dependent endocytosis (GO:1900186)	4	1	0.09	+	10.66	0.109	0.874	Cluster 1
nodal signaling pathway involved in determination of lateral mesoderm left/right asymmetry (GO:1900164)	4	1	0.09	+	10.66	0.109	0.873	Cluster 1
dense core granule priming (GO:0061789)	4	1	0.09	+	10.66	0.109	0.873	Cluster 1
cell migration involved in vasculogenesis (GO:0035441)	4	1	0.09	+	10.66	0.109	0.872	Cluster 1
negative regulation of histone deacetylation (GO:0031064)	4	1	0.09	+	10.66	0.109	0.872	Cluster 1
nonassociative learning (GO:0046958)	8	2	0.19	+	10.66	0.0209	0.363	Cluster 1
regulation of transcription from RNA polymerase II promoter involved in determination of left/right symmetry (GO:1900094)	4	1	0.09	+	10.66	0.109	0.871	Cluster 1
positive regulation of hippo signaling (GO:0035332)	4	1	0.09	+	10.66	0.109	0.871	Cluster 1
cell communication by electrical coupling involved in cardiac conduction (GO:0086064)	4	1	0.09	+	10.66	0.109	0.871	Cluster 1
regulation of Toll signaling pathway (GO:0008592)	4	1	0.09	+	10.66	0.109	0.87	Cluster 1
positive regulation of aorta morphogenesis (GO:1903849)	4	1	0.09	+	10.66	0.109	0.87	Cluster 1
regulation of aorta morphogenesis (GO:1903847)	4	1	0.09	+	10.66	0.109	0.869	Cluster 1
positive regulation of nitric oxide mediated signal transduction (GO:0010750)	4	1	0.09	+	10.66	0.109	0.869	Cluster 1
negative regulation of hydrogen peroxide biosynthetic process (GO:0010730)	4	1	0.09	+	10.66	0.109	0.868	Cluster 1
regulation of definitive erythrocyte differentiation (GO:0010724)	4	1	0.09	+	10.66	0.109	0.868	Cluster 1
negative regulation of transcription from RNA polymerase II promoter in response to hypoxia (GO:0061428)	4	1	0.09	+	10.66	0.109	0.867	Cluster 1
regulation of cell communication by electrical coupling (GO:0010649)	8	2	0.19	+	10.66	0.0209	0.362	Cluster 1
cell communication by electrical coupling (GO:0010644)	8	2	0.19	+	10.66	0.0209	0.362	Cluster 1
negative regulation of wound healing, spreading of epidermal cells (GO:1903690)	4	1	0.09	+	10.66	0.109	0.867	Cluster 1
regulation of Wnt protein secretion (GO:0061356)	4	1	0.09	+	10.66	0.109	0.867	Cluster 1
neuronal signal transduction (GO:0023041)	4	1	0.09	+	10.66	0.109	0.866	Cluster 1
regulation of photoreceptor cell differentiation (GO:0046532)	8	2	0.19	+	10.66	0.0209	0.361	Cluster 1
regulation of G protein-coupled receptor internalization (GO:1904020)	4	1	0.09	+	10.66	0.109	0.866	Cluster 1
negative regulation of phospholipase activity (GO:0010519)	8	2	0.19	+	10.66	0.0209	0.361	Cluster 1
positive regulation of membrane tubulation (GO:1903527)	4	1	0.09	+	10.66	0.109	0.865	Cluster 1
microspike assembly (GO:0030035)	4	1	0.09	+	10.66	0.109	0.865	Cluster 1
positive regulation of T cell mediated immune response to tumor cell (GO:0002842)	4	1	0.09	+	10.66	0.109	0.864	Cluster 1
fungiform papilla formation (GO:0061198)	4	1	0.09	+	10.66	0.109	0.864	Cluster 1
positive regulation of translational fidelity (GO:0045903)	4	1	0.09	+	10.66	0.109	0.864	Cluster 1
pancreas morphogenesis (GO:0061113)	4	1	0.09	+	10.66	0.109	0.863	Cluster 1
mechanosensory behavior (GO:0007638)	16	4	0.38	+	10.66	0.000985	0.0362	Cluster 1
negative regulation of prostatic bud formation (GO:0060686)	4	1	0.09	+	10.66	0.109	0.863	Cluster 1
negative regulation of transcription initiation from RNA polymerase II promoter (GO:0060633)	4	1	0.09	+	10.66	0.109	0.862	Cluster 1
regulation of chromosome condensation (GO:0060623)	4	1	0.09	+	10.66	0.109	0.862	Cluster 1
glial cell apoptotic process (GO:0034349)	4	1	0.09	+	10.66	0.109	0.861	Cluster 1
regulation of neural retina development (GO:0061074)	8	2	0.19	+	10.66	0.0209	0.361	Cluster 1
negative regulation of dendritic spine development (GO:0061000)	16	4	0.38	+	10.66	0.000985	0.0361	Cluster 1
modulation of microtubule cytoskeleton involved in cerebral cortex radial glia guided migration (GO:0021815)	4	1	0.09	+	10.66	0.109	0.861	Cluster 1
axonal fasciculation (GO:0007413)	25	6	0.59	+	10.24	6.35e-05	0.00346	Cluster 1
neuron projection fasciculation (GO:0106030)	25	6	0.59	+	10.24	6.35e-05	0.00345	Cluster 1
neuron recognition (GO:0008038)	50	12	1.17	+	10.24	1.41e-08	1.6e-06	Cluster 1
forebrain neuron differentiation (GO:0021879)	59	14	1.38	+	10.12	9.88e-10	1.25e-07	Cluster 1
clathrin coat assembly (GO:0048268)	17	4	0.4	+	10.04	0.0012	0.0424	Cluster 1
ionotropic glutamate receptor signaling pathway (GO:0035235)	17	4	0.4	+	10.04	0.0012	0.0423	Cluster 1
telencephalon glial cell migration (GO:0022030)	26	6	0.61	+	9.84	7.67e-05	0.00408	Cluster 1
negative regulation of sodium ion transmembrane transporter activity (GO:2000650)	13	3	0.3	+	9.84	0.00536	0.139	Cluster 1
neuronal ion channel clustering (GO:0045161)	13	3	0.3	+	9.84	0.00536	0.138	Cluster 1
forebrain neuron fate commitment (GO:0021877)	13	3	0.3	+	9.84	0.00536	0.138	Cluster 1
pyramidal neuron differentiation (GO:0021859)	13	3	0.3	+	9.84	0.00536	0.138	Cluster 1
cerebral cortex radial glia guided migration (GO:0021801)	26	6	0.61	+	9.84	7.67e-05	0.00406	Cluster 1
negative regulation of neuroblast proliferation (GO:0007406)	9	2	0.21	+	9.48	0.0251	0.416	Cluster 1
regulation of toll-like receptor 9 signaling pathway (GO:0034163)	9	2	0.21	+	9.48	0.0251	0.416	Cluster 1
positive regulation of axon guidance (GO:1902669)	9	2	0.21	+	9.48	0.0251	0.415	Cluster 1
cellular response to epinephrine stimulus (GO:0071872)	9	2	0.21	+	9.48	0.0251	0.415	Cluster 1
response to epinephrine (GO:0071871)	9	2	0.21	+	9.48	0.0251	0.415	Cluster 1
regulation of epithelial cell proliferation involved in lung morphogenesis (GO:2000794)	9	2	0.21	+	9.48	0.0251	0.414	Cluster 1
dense core granule transport (GO:1901950)	9	2	0.21	+	9.48	0.0251	0.414	Cluster 1
microtubule depolymerization (GO:0007019)	18	4	0.42	+	9.48	0.00143	0.0489	Cluster 1
negative regulation of cardiac muscle cell proliferation (GO:0060044)	18	4	0.42	+	9.48	0.00143	0.0488	Cluster 1
anterograde axonal protein transport (GO:0099641)	9	2	0.21	+	9.48	0.0251	0.413	Cluster 1
regulation of branching morphogenesis of a nerve (GO:2000172)	9	2	0.21	+	9.48	0.0251	0.413	Cluster 1
trans-synaptic signaling by trans-synaptic complex (GO:0099545)	9	2	0.21	+	9.48	0.0251	0.412	Cluster 1
dense core granule cytoskeletal transport (GO:0099519)	9	2	0.21	+	9.48	0.0251	0.412	Cluster 1
regulation of glutamine family amino acid metabolic process (GO:0000820)	9	2	0.21	+	9.48	0.0251	0.412	Cluster 1
axon extension (GO:0048675)	36	8	0.84	+	9.48	6.17e-06	0.000435	Cluster 1
regulation of pigment cell differentiation (GO:0050932)	9	2	0.21	+	9.48	0.0251	0.411	Cluster 1
dense core granule localization (GO:0032253)	9	2	0.21	+	9.48	0.0251	0.411	Cluster 1
neurotransmitter receptor transport, endosome to postsynaptic membrane (GO:0098887)	9	2	0.21	+	9.48	0.0251	0.41	Cluster 1
observational learning (GO:0098597)	9	2	0.21	+	9.48	0.0251	0.41	Cluster 1
protein localization to presynapse (GO:1905383)	9	2	0.21	+	9.48	0.0251	0.409	Cluster 1
positive regulation of long-term synaptic depression (GO:1900454)	9	2	0.21	+	9.48	0.0251	0.409	Cluster 1
regulation of cardiac muscle cell membrane potential (GO:0086036)	9	2	0.21	+	9.48	0.0251	0.409	Cluster 1
regulation of cardiac muscle contraction by regulation of the release of sequestered calcium ion (GO:0010881)	9	2	0.21	+	9.48	0.0251	0.408	Cluster 1
adherens junction maintenance (GO:0034334)	9	2	0.21	+	9.48	0.0251	0.408	Cluster 1
regulation of dendrite extension (GO:1903859)	32	7	0.75	+	9.33	2.59e-05	0.00157	Cluster 1
regulation of dendritic spine morphogenesis (GO:0061001)	55	12	1.29	+	9.31	3.52e-08	3.83e-06	Cluster 1
positive regulation of synaptic plasticity (GO:0031915)	14	3	0.33	+	9.14	0.0064	0.158	Cluster 1
positive regulation of non-canonical Wnt signaling pathway (GO:2000052)	14	3	0.33	+	9.14	0.0064	0.157	Cluster 1
positive regulation of collateral sprouting (GO:0048672)	14	3	0.33	+	9.14	0.0064	0.157	Cluster 1
regulation of dendritic spine maintenance (GO:1902950)	14	3	0.33	+	9.14	0.0064	0.157	Cluster 1
forebrain neuron development (GO:0021884)	33	7	0.77	+	9.05	3.08e-05	0.00183	Cluster 1
olfactory bulb development (GO:0021772)	38	8	0.89	+	8.98	8.72e-06	0.000599	Cluster 1
regulation of postsynaptic density organization (GO:1905874)	19	4	0.45	+	8.98	0.00171	0.0569	Cluster 1
neurotransmitter receptor transport to postsynaptic membrane (GO:0098969)	19	4	0.45	+	8.98	0.00171	0.0568	Cluster 1
regulation of microtubule polymerization (GO:0031113)	53	11	1.24	+	8.85	2.04e-07	1.87e-05	Cluster 1
central nervous system projection neuron axonogenesis (GO:0021952)	29	6	0.68	+	8.82	0.00013	0.00628	Cluster 1
regulation of neuron migration (GO:2001222)	54	11	1.27	+	8.69	2.4e-07	2.18e-05	Cluster 1
respiratory burst involved in defense response (GO:0002679)	5	1	0.12	+	8.53	0.13	0.977	Cluster 1
response to selenium ion (GO:0010269)	5	1	0.12	+	8.53	0.13	0.977	Cluster 1
midgut development (GO:0007494)	5	1	0.12	+	8.53	0.13	0.976	Cluster 1
cerebellar granule cell differentiation (GO:0021707)	10	2	0.23	+	8.53	0.0297	0.462	Cluster 1
regulation of lens fiber cell differentiation (GO:1902746)	10	2	0.23	+	8.53	0.0297	0.462	Cluster 1
somatic diversification of T cell receptor genes (GO:0002568)	5	1	0.12	+	8.53	0.13	0.976	Cluster 1
positive regulation of melanocyte differentiation (GO:0045636)	5	1	0.12	+	8.53	0.13	0.975	Cluster 1
cerebellar granular layer formation (GO:0021684)	10	2	0.23	+	8.53	0.0297	0.461	Cluster 1
trigeminal nerve structural organization (GO:0021637)	5	1	0.12	+	8.53	0.13	0.975	Cluster 1
trigeminal nerve morphogenesis (GO:0021636)	5	1	0.12	+	8.53	0.13	0.974	Cluster 1
minus-end-directed organelle transport along microtubule (GO:0072385)	5	1	0.12	+	8.53	0.13	0.974	Cluster 1
regulation of growth hormone receptor signaling pathway (GO:0060398)	5	1	0.12	+	8.53	0.13	0.974	Cluster 1
positive regulation of ryanodine-sensitive calcium-release channel activity (GO:0060316)	5	1	0.12	+	8.53	0.13	0.973	Cluster 1
interkinetic nuclear migration (GO:0022027)	10	2	0.23	+	8.53	0.0297	0.461	Cluster 1
central nervous system vasculogenesis (GO:0022009)	5	1	0.12	+	8.53	0.13	0.973	Cluster 1
glossopharyngeal nerve development (GO:0021563)	5	1	0.12	+	8.53	0.13	0.972	Cluster 1
cell migration in hindbrain (GO:0021535)	20	4	0.47	+	8.53	0.00201	0.0654	Cluster 1
intramembranous ossification (GO:0001957)	5	1	0.12	+	8.53	0.13	0.972	Cluster 1
positive regulation of sarcomere organization (GO:0060298)	5	1	0.12	+	8.53	0.13	0.971	Cluster 1
regulation of sarcomere organization (GO:0060297)	10	2	0.23	+	8.53	0.0297	0.46	Cluster 1
regulation of protein monoubiquitination (GO:1902525)	5	1	0.12	+	8.53	0.13	0.971	Cluster 1
regulation of basement membrane organization (GO:0110011)	5	1	0.12	+	8.53	0.13	0.97	Cluster 1
pro-B cell differentiation (GO:0002328)	5	1	0.12	+	8.53	0.13	0.97	Cluster 1
urinary bladder development (GO:0060157)	5	1	0.12	+	8.53	0.13	0.969	Cluster 1
maternal process involved in parturition (GO:0060137)	5	1	0.12	+	8.53	0.13	0.969	Cluster 1
regulation of platelet-derived growth factor receptor-alpha signaling pathway (GO:2000583)	5	1	0.12	+	8.53	0.13	0.969	Cluster 1
positive regulation of cellular pH reduction (GO:0032849)	5	1	0.12	+	8.53	0.13	0.968	Cluster 1
negative regulation of sodium ion transmembrane transport (GO:1902306)	15	3	0.35	+	8.53	0.00755	0.177	Cluster 1
glutamate catabolic process (GO:0006538)	5	1	0.12	+	8.53	0.13	0.968	Cluster 1
regulation of thyroid hormone mediated signaling pathway (GO:0002155)	5	1	0.12	+	8.53	0.13	0.967	Cluster 1
positive regulation of high voltage-gated calcium channel activity (GO:1901843)	5	1	0.12	+	8.53	0.13	0.967	Cluster 1
non-canonical Wnt signaling pathway via JNK cascade (GO:0038031)	5	1	0.12	+	8.53	0.13	0.966	Cluster 1
regulation of timing of anagen (GO:0051884)	5	1	0.12	+	8.53	0.13	0.966	Cluster 1
protein sialylation (GO:1990743)	5	1	0.12	+	8.53	0.13	0.965	Cluster 1
regulation of synapse structural plasticity (GO:0051823)	10	2	0.23	+	8.53	0.0297	0.46	Cluster 1
T cell receptor V(D)J recombination (GO:0033153)	5	1	0.12	+	8.53	0.13	0.965	Cluster 1
negative regulation of interferon-alpha production (GO:0032687)	5	1	0.12	+	8.53	0.13	0.964	Cluster 1
positive regulation of glucocorticoid receptor signaling pathway (GO:2000324)	5	1	0.12	+	8.53	0.13	0.964	Cluster 1
positive regulation of vesicle transport along microtubule (GO:1901610)	5	1	0.12	+	8.53	0.13	0.963	Cluster 1
neurotransmitter receptor transport, endosome to plasma membrane (GO:0099639)	10	2	0.23	+	8.53	0.0297	0.459	Cluster 1
protein localization to juxtaparanode region of axon (GO:0071205)	5	1	0.12	+	8.53	0.13	0.963	Cluster 1
positive regulation of hair follicle maturation (GO:0048818)	5	1	0.12	+	8.53	0.13	0.963	Cluster 1
negative regulation of DNA-templated transcription, initiation (GO:2000143)	5	1	0.12	+	8.53	0.13	0.962	Cluster 1
calcium-dependent activation of synaptic vesicle fusion (GO:0099502)	5	1	0.12	+	8.53	0.13	0.962	Cluster 1
regulation of 3'-UTR-mediated mRNA stabilization (GO:1905868)	5	1	0.12	+	8.53	0.13	0.961	Cluster 1
regulation of osteoclast proliferation (GO:0090289)	5	1	0.12	+	8.53	0.13	0.961	Cluster 1
glucosamine metabolic process (GO:0006041)	5	1	0.12	+	8.53	0.13	0.96	Cluster 1
retrograde trans-synaptic signaling by trans-synaptic protein complex (GO:0098942)	5	1	0.12	+	8.53	0.13	0.96	Cluster 1
protein localization to microtubule end (GO:1905725)	5	1	0.12	+	8.53	0.13	0.959	Cluster 1
regulation of atrial cardiac muscle cell action potential (GO:0098910)	5	1	0.12	+	8.53	0.13	0.959	Cluster 1
regulation of cardiac muscle cell action potential involved in regulation of contraction (GO:0098909)	5	1	0.12	+	8.53	0.13	0.959	Cluster 1
dendrite self-avoidance (GO:0070593)	15	3	0.35	+	8.53	0.00755	0.176	Cluster 1
positive regulation of sprouting of injured axon (GO:0048687)	5	1	0.12	+	8.53	0.13	0.958	Cluster 1
sensory perception of touch (GO:0050975)	5	1	0.12	+	8.53	0.13	0.958	Cluster 1
central nervous system myelin formation (GO:0032289)	5	1	0.12	+	8.53	0.13	0.957	Cluster 1
regulation of membrane depolarization during cardiac muscle cell action potential (GO:1900825)	5	1	0.12	+	8.53	0.13	0.957	Cluster 1
regulation of vesicle docking (GO:0106020)	5	1	0.12	+	8.53	0.13	0.956	Cluster 1
telomere assembly (GO:0032202)	5	1	0.12	+	8.53	0.13	0.956	Cluster 1
neurotransmitter receptor transport to plasma membrane (GO:0098877)	20	4	0.47	+	8.53	0.00201	0.0653	Cluster 1
regulation of heart induction by regulation of canonical Wnt signaling pathway (GO:0090081)	5	1	0.12	+	8.53	0.13	0.955	Cluster 1
regulation of phospholipase C-activating G protein-coupled receptor signaling pathway (GO:1900736)	5	1	0.12	+	8.53	0.13	0.955	Cluster 1
positive regulation of the force of heart contraction (GO:0098735)	5	1	0.12	+	8.53	0.13	0.955	Cluster 1
positive regulation of synaptic vesicle fusion to presynaptic active zone membrane (GO:0031632)	5	1	0.12	+	8.53	0.13	0.954	Cluster 1
calcium ion import across plasma membrane (GO:0098703)	15	3	0.35	+	8.53	0.00755	0.176	Cluster 1
aggrephagy (GO:0035973)	5	1	0.12	+	8.53	0.13	0.954	Cluster 1
retrograde neuronal dense core vesicle transport (GO:1990049)	5	1	0.12	+	8.53	0.13	0.953	Cluster 1
negative regulation of relaxation of muscle (GO:1901078)	5	1	0.12	+	8.53	0.13	0.953	Cluster 1
ascending aorta development (GO:0035905)	5	1	0.12	+	8.53	0.13	0.952	Cluster 1
Wnt signaling pathway involved in midbrain dopaminergic neuron differentiation (GO:1904953)	5	1	0.12	+	8.53	0.13	0.952	Cluster 1
modification of postsynaptic structure (GO:0099010)	15	3	0.35	+	8.53	0.00755	0.176	Cluster 1
learned vocalization behavior or vocal learning (GO:0098598)	10	2	0.23	+	8.53	0.0297	0.459	Cluster 1
protein localization to microtubule plus-end (GO:1904825)	5	1	0.12	+	8.53	0.13	0.951	Cluster 1
regulation of dense core granule transport (GO:1904809)	5	1	0.12	+	8.53	0.13	0.951	Cluster 1
cellular response to L-glutamate (GO:1905232)	5	1	0.12	+	8.53	0.13	0.951	Cluster 1
response to insecticide (GO:0017085)	5	1	0.12	+	8.53	0.13	0.95	Cluster 1
gamma-aminobutyric acid metabolic process (GO:0009448)	5	1	0.12	+	8.53	0.13	0.95	Cluster 1
regulation of short-term neuronal synaptic plasticity (GO:0048172)	20	4	0.47	+	8.53	0.00201	0.0652	Cluster 1
stress granule disassembly (GO:0035617)	5	1	0.12	+	8.53	0.13	0.949	Cluster 1
direct ossification (GO:0036072)	5	1	0.12	+	8.53	0.13	0.949	Cluster 1
cellular response to interleukin-3 (GO:0036016)	5	1	0.12	+	8.53	0.13	0.948	Cluster 1
response to interleukin-3 (GO:0036015)	5	1	0.12	+	8.53	0.13	0.948	Cluster 1
10-formyltetrahydrofolate metabolic process (GO:0009256)	5	1	0.12	+	8.53	0.13	0.947	Cluster 1
negative regulation of oocyte maturation (GO:1900194)	5	1	0.12	+	8.53	0.13	0.947	Cluster 1
habituation (GO:0046959)	5	1	0.12	+	8.53	0.13	0.947	Cluster 1
chemoattraction of axon (GO:0061642)	5	1	0.12	+	8.53	0.13	0.946	Cluster 1
membrane depolarization during AV node cell action potential (GO:0086045)	5	1	0.12	+	8.53	0.13	0.946	Cluster 1
negative regulation of odontogenesis (GO:0042483)	5	1	0.12	+	8.53	0.13	0.945	Cluster 1
positive regulation of basement membrane assembly involved in embryonic body morphogenesis (GO:1904261)	5	1	0.12	+	8.53	0.13	0.945	Cluster 1
regulation of basement membrane assembly involved in embryonic body morphogenesis (GO:1904259)	5	1	0.12	+	8.53	0.13	0.944	Cluster 1
regulation of extracellular matrix disassembly (GO:0010715)	15	3	0.35	+	8.53	0.00755	0.176	Cluster 1
positive regulation of macrophage cytokine production (GO:0060907)	10	2	0.23	+	8.53	0.0297	0.458	Cluster 1
apoptotic chromosome condensation (GO:0030263)	5	1	0.12	+	8.53	0.13	0.944	Cluster 1
growth hormone secretion (GO:0030252)	5	1	0.12	+	8.53	0.13	0.944	Cluster 1
positive regulation of cytoplasmic mRNA processing body assembly (GO:0010606)	5	1	0.12	+	8.53	0.13	0.943	Cluster 1
cell adhesion involved in heart morphogenesis (GO:0061343)	5	1	0.12	+	8.53	0.13	0.943	Cluster 1
negative regulation of Rac protein signal transduction (GO:0035021)	5	1	0.12	+	8.53	0.13	0.942	Cluster 1
regulation of Rac protein signal transduction (GO:0035020)	20	4	0.47	+	8.53	0.00201	0.065	Cluster 1
positive regulation of eating behavior (GO:1904000)	5	1	0.12	+	8.53	0.13	0.942	Cluster 1
positive regulation of B cell apoptotic process (GO:0002904)	5	1	0.12	+	8.53	0.13	0.941	Cluster 1
positive regulation of protein localization to cilium (GO:1903566)	5	1	0.12	+	8.53	0.13	0.941	Cluster 1
establishment of protein localization to postsynaptic membrane (GO:1903540)	20	4	0.47	+	8.53	0.00201	0.0649	Cluster 1
regulation of membrane tubulation (GO:1903525)	5	1	0.12	+	8.53	0.13	0.941	Cluster 1
hair follicle placode formation (GO:0060789)	5	1	0.12	+	8.53	0.13	0.94	Cluster 1
regulation of branching involved in mammary gland duct morphogenesis (GO:0060762)	5	1	0.12	+	8.53	0.13	0.94	Cluster 1
epithelial cell proliferation involved in mammary gland duct elongation (GO:0060750)	5	1	0.12	+	8.53	0.13	0.939	Cluster 1
Wnt signaling pathway involved in heart development (GO:0003306)	5	1	0.12	+	8.53	0.13	0.939	Cluster 1
GABAergic neuron differentiation (GO:0097154)	15	3	0.35	+	8.53	0.00755	0.175	Cluster 1
hindbrain radial glia guided cell migration (GO:0021932)	15	3	0.35	+	8.53	0.00755	0.175	Cluster 1
atrial septum primum morphogenesis (GO:0003289)	5	1	0.12	+	8.53	0.13	0.938	Cluster 1
cell differentiation involved in salivary gland development (GO:0060689)	5	1	0.12	+	8.53	0.13	0.938	Cluster 1
cardiac ventricle formation (GO:0003211)	10	2	0.23	+	8.53	0.0297	0.458	Cluster 1
positive regulation of dendritic spine maintenance (GO:1902952)	5	1	0.12	+	8.53	0.13	0.938	Cluster 1
negative regulation of sister chromatid cohesion (GO:0045875)	5	1	0.12	+	8.53	0.13	0.937	Cluster 1
regulation of adherens junction organization (GO:1903391)	5	1	0.12	+	8.53	0.13	0.937	Cluster 1
layer formation in cerebral cortex (GO:0021819)	15	3	0.35	+	8.53	0.00755	0.175	Cluster 1
somatic recombination of T cell receptor gene segments (GO:0002681)	5	1	0.12	+	8.53	0.13	0.936	Cluster 1
regulation of microtubule polymerization or depolymerization (GO:0031110)	91	18	2.13	+	8.44	5.49e-11	8.18e-09	Cluster 1
forebrain generation of neurons (GO:0021872)	71	14	1.66	+	8.41	7.9e-09	9.31e-07	Cluster 1
olfactory lobe development (GO:0021988)	41	8	0.96	+	8.32	1.42e-05	0.000904	Cluster 1
negative regulation of dendrite development (GO:2000171)	36	7	0.84	+	8.29	5.01e-05	0.00281	Cluster 1
receptor localization to synapse (GO:0097120)	52	10	1.22	+	8.2	1.35e-06	0.000108	Cluster 1
dendrite morphogenesis (GO:0048813)	74	14	1.73	+	8.07	1.26e-08	1.46e-06	Cluster 1
calcium ion import into cytosol (GO:1902656)	16	3	0.38	+	8	0.00881	0.198	Cluster 1
endoplasmic reticulum tubular network organization (GO:0071786)	16	3	0.38	+	8	0.00881	0.198	Cluster 1
axo-dendritic protein transport (GO:0099640)	16	3	0.38	+	8	0.00881	0.198	Cluster 1
postsynaptic actin cytoskeleton organization (GO:0098974)	16	3	0.38	+	8	0.00881	0.197	Cluster 1
postsynaptic cytoskeleton organization (GO:0099188)	16	3	0.38	+	8	0.00881	0.197	Cluster 1
regulation of neurotransmitter receptor localization to postsynaptic specialization membrane (GO:0098696)	16	3	0.38	+	8	0.00881	0.197	Cluster 1
regulation of relaxation of muscle (GO:1901077)	16	3	0.38	+	8	0.00881	0.197	Cluster 1
calcium-ion regulated exocytosis (GO:0017156)	43	8	1.01	+	7.94	1.93e-05	0.0012	Cluster 1
negative regulation of synapse organization (GO:1905809)	27	5	0.63	+	7.9	0.000747	0.0291	Cluster 1
positive regulation of axonogenesis (GO:0050772)	103	19	2.41	+	7.87	4.62e-11	7.08e-09	Cluster 1
positive regulation of dendrite morphogenesis (GO:0050775)	55	10	1.29	+	7.76	2.11e-06	0.00016	Cluster 1
positive regulation of microtubule polymerization or depolymerization (GO:0031112)	33	6	0.77	+	7.76	0.000241	0.0107	Cluster 1
neuronal action potential propagation (GO:0019227)	11	2	0.26	+	7.76	0.0346	0.515	Cluster 1
neuron cell-cell adhesion (GO:0007158)	11	2	0.26	+	7.76	0.0346	0.514	Cluster 1
glomerulus morphogenesis (GO:0072102)	11	2	0.26	+	7.76	0.0346	0.514	Cluster 1
glycosphingolipid biosynthetic process (GO:0006688)	22	4	0.52	+	7.76	0.00273	0.0838	Cluster 1
nerve growth factor signaling pathway (GO:0038180)	11	2	0.26	+	7.76	0.0346	0.513	Cluster 1
righting reflex (GO:0060013)	11	2	0.26	+	7.76	0.0346	0.513	Cluster 1
regulation of translational fidelity (GO:0006450)	11	2	0.26	+	7.76	0.0346	0.512	Cluster 1
establishment of endothelial intestinal barrier (GO:0090557)	11	2	0.26	+	7.76	0.0346	0.512	Cluster 1
ganglioside metabolic process (GO:0001573)	22	4	0.52	+	7.76	0.00273	0.0836	Cluster 1
histone H4 deacetylation (GO:0070933)	11	2	0.26	+	7.76	0.0346	0.511	Cluster 1
protein localization to axon (GO:0099612)	11	2	0.26	+	7.76	0.0346	0.511	Cluster 1
neural nucleus development (GO:0048857)	22	4	0.52	+	7.76	0.00273	0.0835	Cluster 1
venous blood vessel morphogenesis (GO:0048845)	11	2	0.26	+	7.76	0.0346	0.51	Cluster 1
negative regulation of translation, ncRNA-mediated (GO:0040033)	11	2	0.26	+	7.76	0.0346	0.51	Cluster 1
action potential propagation (GO:0098870)	11	2	0.26	+	7.76	0.0346	0.509	Cluster 1
asymmetric stem cell division (GO:0098722)	11	2	0.26	+	7.76	0.0346	0.509	Cluster 1
regulation of synaptic vesicle fusion to presynaptic active zone membrane (GO:0031630)	11	2	0.26	+	7.76	0.0346	0.508	Cluster 1
positive regulation of mitochondrial outer membrane permeabilization involved in apoptotic signaling pathway (GO:1901030)	11	2	0.26	+	7.76	0.0346	0.508	Cluster 1
miRNA mediated inhibition of translation (GO:0035278)	11	2	0.26	+	7.76	0.0346	0.507	Cluster 1
embryonic camera-type eye formation (GO:0060900)	11	2	0.26	+	7.76	0.0346	0.507	Cluster 1
regulation of epithelial cell proliferation involved in prostate gland development (GO:0060768)	11	2	0.26	+	7.76	0.0346	0.506	Cluster 1
postsynaptic membrane assembly (GO:0097104)	11	2	0.26	+	7.76	0.0346	0.506	Cluster 1
regulation of translation, ncRNA-mediated (GO:0045974)	11	2	0.26	+	7.76	0.0346	0.506	Cluster 1
regulation of female receptivity (GO:0045924)	11	2	0.26	+	7.76	0.0346	0.505	Cluster 1
cardiac chamber formation (GO:0003207)	11	2	0.26	+	7.76	0.0346	0.505	Cluster 1
protein localization to postsynapse (GO:0062237)	50	9	1.17	+	7.68	7.36e-06	0.000512	Cluster 1
glutamate receptor signaling pathway (GO:0007215)	39	7	0.91	+	7.66	7.85e-05	0.00415	Cluster 1
regulation of dendrite morphogenesis (GO:0048814)	117	21	2.74	+	7.66	6.94e-12	1.23e-09	Cluster 1
positive regulation of dendrite extension (GO:1903861)	28	5	0.66	+	7.62	0.000864	0.0328	Cluster 1
hippocampus development (GO:0021766)	73	13	1.71	+	7.6	7.81e-08	7.9e-06	Cluster 1
positive regulation of cell size (GO:0045793)	17	3	0.4	+	7.53	0.0102	0.217	Cluster 1
positive regulation of histone H3-K4 methylation (GO:0051571)	17	3	0.4	+	7.53	0.0102	0.216	Cluster 1
regulation of transcription involved in cell fate commitment (GO:0060850)	17	3	0.4	+	7.53	0.0102	0.216	Cluster 1
negative regulation of insulin secretion involved in cellular response to glucose stimulus (GO:0061179)	17	3	0.4	+	7.53	0.0102	0.216	Cluster 1
negative regulation of protein depolymerization (GO:1901880)	74	13	1.73	+	7.49	8.99e-08	8.82e-06	Cluster 1
establishment of monopolar cell polarity (GO:0061162)	23	4	0.54	+	7.42	0.00314	0.0911	Cluster 1
gamma-aminobutyric acid signaling pathway (GO:0007214)	29	5	0.68	+	7.35	0.000994	0.0364	Cluster 1
positive regulation of microtubule polymerization (GO:0031116)	29	5	0.68	+	7.35	0.000994	0.0363	Cluster 1
cerebral cortex cell migration (GO:0021795)	53	9	1.24	+	7.24	1.12e-05	0.000742	Cluster 1
regulation of forebrain neuron differentiation (GO:2000977)	6	1	0.14	+	7.11	0.15	1	Cluster 1
positive regulation of toll-like receptor 9 signaling pathway (GO:0034165)	6	1	0.14	+	7.11	0.15	1	Cluster 1
cerebellar granular layer morphogenesis (GO:0021683)	12	2	0.28	+	7.11	0.0397	0.553	Cluster 1
microtubule anchoring at microtubule organizing center (GO:0072393)	12	2	0.28	+	7.11	0.0397	0.553	Cluster 1
positive regulation of dopamine secretion (GO:0033603)	12	2	0.28	+	7.11	0.0397	0.552	Cluster 1
negative regulation of mammary gland epithelial cell proliferation (GO:0033600)	6	1	0.14	+	7.11	0.15	1	Cluster 1
regulation of grooming behavior (GO:2000821)	6	1	0.14	+	7.11	0.15	1	Cluster 1
regulation of membrane hyperpolarization (GO:1902630)	6	1	0.14	+	7.11	0.15	1	Cluster 1
positive regulation of ER-associated ubiquitin-dependent protein catabolic process (GO:1903071)	6	1	0.14	+	7.11	0.15	1	Cluster 1
subpallium development (GO:0021544)	24	4	0.56	+	7.11	0.0036	0.101	Cluster 1
negative regulation of oocyte development (GO:0060283)	6	1	0.14	+	7.11	0.15	1	Cluster 1
positive regulation of transcription of Notch receptor target (GO:0007221)	6	1	0.14	+	7.11	0.15	1	Cluster 1
polyphosphate catabolic process (GO:0006798)	6	1	0.14	+	7.11	0.15	1	Cluster 1
polyphosphate metabolic process (GO:0006797)	6	1	0.14	+	7.11	0.15	1	Cluster 1
positive regulation of nuclear-transcribed mRNA poly(A) tail shortening (GO:0060213)	12	2	0.28	+	7.11	0.0397	0.552	Cluster 1
regulation of calcium ion transmembrane transport via high voltage-gated calcium channel (GO:1902514)	12	2	0.28	+	7.11	0.0397	0.551	Cluster 1
regulation of organelle transport along microtubule (GO:1902513)	12	2	0.28	+	7.11	0.0397	0.551	Cluster 1
pre-B cell differentiation (GO:0002329)	6	1	0.14	+	7.11	0.15	1	Cluster 1
hard palate development (GO:0060022)	6	1	0.14	+	7.11	0.15	1	Cluster 1
receptor biosynthetic process (GO:0032800)	6	1	0.14	+	7.11	0.15	1	Cluster 1
negative regulation of synaptic transmission, glutamatergic (GO:0051967)	12	2	0.28	+	7.11	0.0397	0.55	Cluster 1
neurotransmitter receptor metabolic process (GO:0045213)	6	1	0.14	+	7.11	0.15	1	Cluster 1
positive regulation of cAMP-dependent protein kinase activity (GO:2000481)	6	1	0.14	+	7.11	0.15	1	Cluster 1
semaphorin-plexin signaling pathway involved in axon guidance (GO:1902287)	12	2	0.28	+	7.11	0.0397	0.55	Cluster 1
non-canonical Wnt signaling pathway via MAPK cascade (GO:0038030)	6	1	0.14	+	7.11	0.15	1	Cluster 1
blood vessel endothelial cell proliferation involved in sprouting angiogenesis (GO:0002043)	6	1	0.14	+	7.11	0.15	1	Cluster 1
positive regulation of histone ubiquitination (GO:0033184)	6	1	0.14	+	7.11	0.15	1	Cluster 1
protein de-ADP-ribosylation (GO:0051725)	6	1	0.14	+	7.11	0.15	1	Cluster 1
regulation of vesicle transport along microtubule (GO:1901608)	6	1	0.14	+	7.11	0.15	1	Cluster 1
heterochromatin maintenance (GO:0070829)	6	1	0.14	+	7.11	0.15	1	Cluster 1
cellular response to magnesium ion (GO:0071286)	6	1	0.14	+	7.11	0.15	1	Cluster 1
maintenance of centrosome location (GO:0051661)	6	1	0.14	+	7.11	0.15	1	Cluster 1
regulation of locomotion involved in locomotory behavior (GO:0090325)	6	1	0.14	+	7.11	0.15	1	Cluster 1
negative regulation of protein targeting to membrane (GO:0090315)	6	1	0.14	+	7.11	0.15	1	Cluster 1
diencephalon morphogenesis (GO:0048852)	6	1	0.14	+	7.11	0.15	1	Cluster 1
regulation of protein catabolic process at postsynapse, modulating synaptic transmission (GO:0099576)	6	1	0.14	+	7.11	0.15	1	Cluster 1
negative regulation of macrophage apoptotic process (GO:2000110)	6	1	0.14	+	7.11	0.15	1	Cluster 1
establishment of protein localization to chromatin (GO:0071169)	6	1	0.14	+	7.11	0.15	1	Cluster 1
negative regulation of oogenesis (GO:1905880)	6	1	0.14	+	7.11	0.15	1	Cluster 1
negative regulation of mitochondrial calcium ion concentration (GO:0051562)	6	1	0.14	+	7.11	0.15	1	Cluster 1
negative regulation of synaptic plasticity (GO:0031914)	6	1	0.14	+	7.11	0.15	1	Cluster 1
positive regulation of histone H4 acetylation (GO:0090240)	6	1	0.14	+	7.11	0.15	1	Cluster 1
regulation of membrane depolarization during action potential (GO:0098902)	6	1	0.14	+	7.11	0.15	1	Cluster 1
smooth muscle cell proliferation (GO:0048659)	6	1	0.14	+	7.11	0.15	1	Cluster 1
regulation of inflammatory response to wounding (GO:0106014)	6	1	0.14	+	7.11	0.15	1	Cluster 1
regulation of oligodendrocyte progenitor proliferation (GO:0070445)	12	2	0.28	+	7.11	0.0397	0.549	Cluster 1
positive regulation of vascular endothelial growth factor signaling pathway (GO:1900748)	6	1	0.14	+	7.11	0.15	1	Cluster 1
dopaminergic neuron axon guidance (GO:0036514)	6	1	0.14	+	7.11	0.15	1	Cluster 1
regulation of synaptic membrane adhesion (GO:0099179)	6	1	0.14	+	7.11	0.15	1	Cluster 1
DNA hypermethylation (GO:0044026)	6	1	0.14	+	7.11	0.15	1	Cluster 1
positive regulation of thymocyte apoptotic process (GO:0070245)	6	1	0.14	+	7.11	0.15	1	Cluster 1
sodium ion export across plasma membrane (GO:0036376)	12	2	0.28	+	7.11	0.0397	0.549	Cluster 1
planar cell polarity pathway involved in axon guidance (GO:1904938)	6	1	0.14	+	7.11	0.15	1	Cluster 1
interneuron migration (GO:1904936)	6	1	0.14	+	7.11	0.15	1	Cluster 1
negative regulation of chemokine-mediated signaling pathway (GO:0070100)	6	1	0.14	+	7.11	0.15	1	Cluster 1
positive regulation of protein localization to nucleolus (GO:1904751)	6	1	0.14	+	7.11	0.15	1	Cluster 1
regulation of secondary metabolite biosynthetic process (GO:1900376)	12	2	0.28	+	7.11	0.0397	0.549	Cluster 1
regulation of melanin biosynthetic process (GO:0048021)	12	2	0.28	+	7.11	0.0397	0.548	Cluster 1
thelarche (GO:0042695)	6	1	0.14	+	7.11	0.15	1	Cluster 1
histone-threonine phosphorylation (GO:0035405)	6	1	0.14	+	7.11	0.15	1	Cluster 1
regulation of microtubule nucleation (GO:0010968)	6	1	0.14	+	7.11	0.15	1	Cluster 1
Roundabout signaling pathway (GO:0035385)	6	1	0.14	+	7.11	0.15	1	Cluster 1
regulation of synaptic growth at neuromuscular junction (GO:0008582)	6	1	0.14	+	7.11	0.15	1	Cluster 1
synaptic vesicle maturation (GO:0016188)	12	2	0.28	+	7.11	0.0397	0.548	Cluster 1
positive regulation of receptor biosynthetic process (GO:0010870)	12	2	0.28	+	7.11	0.0397	0.547	Cluster 1
histone H4-K20 trimethylation (GO:0034773)	6	1	0.14	+	7.11	0.15	1	Cluster 1
regulation of dendritic spine development (GO:0060998)	96	16	2.25	+	7.11	5.76e-09	6.89e-07	Cluster 1
embryonic heart tube left/right pattern formation (GO:0060971)	6	1	0.14	+	7.11	0.15	1	Cluster 1
skeletal muscle thin filament assembly (GO:0030240)	6	1	0.14	+	7.11	0.15	1	Cluster 1
regulation of wound healing, spreading of epidermal cells (GO:1903689)	6	1	0.14	+	7.11	0.15	1	Cluster 1
establishment or maintenance of monopolar cell polarity (GO:0061339)	24	4	0.56	+	7.11	0.0036	0.101	Cluster 1
neurotransmitter biosynthetic process (GO:0042136)	12	2	0.28	+	7.11	0.0397	0.547	Cluster 1
positive regulation of nuclear cell cycle DNA replication (GO:0010571)	6	1	0.14	+	7.11	0.15	1	Cluster 1
branch elongation involved in mammary gland duct branching (GO:0060751)	6	1	0.14	+	7.11	0.15	1	Cluster 1
mammary gland branching involved in thelarche (GO:0060744)	6	1	0.14	+	7.11	0.15	1	Cluster 1
regulation of T cell mediated immune response to tumor cell (GO:0002840)	6	1	0.14	+	7.11	0.15	1	Cluster 1
fungiform papilla morphogenesis (GO:0061197)	6	1	0.14	+	7.11	0.15	1	Cluster 1
septum primum development (GO:0003284)	6	1	0.14	+	7.11	0.15	1	Cluster 1
regulation of prostatic bud formation (GO:0060685)	6	1	0.14	+	7.11	0.15	1	Cluster 1
courtship behavior (GO:0007619)	6	1	0.14	+	7.11	0.15	1	Cluster 1
salivary gland cavitation (GO:0060662)	6	1	0.14	+	7.11	0.15	1	Cluster 1
tube lumen cavitation (GO:0060605)	6	1	0.14	+	7.11	0.15	1	Cluster 1
ncRNA export from nucleus (GO:0097064)	6	1	0.14	+	7.11	0.15	1	Cluster 1
negative regulation of Arp2/3 complex-mediated actin nucleation (GO:0034316)	6	1	0.14	+	7.11	0.15	1	Cluster 1
Toll signaling pathway (GO:0008063)	6	1	0.14	+	7.11	0.15	1	Cluster 1
negative regulation of anion channel activity (GO:0010360)	6	1	0.14	+	7.11	0.15	1	Cluster 1
uterus morphogenesis (GO:0061038)	6	1	0.14	+	7.11	0.15	1	Cluster 1
pyramidal neuron development (GO:0021860)	12	2	0.28	+	7.11	0.0397	0.546	Cluster 1
cerebral cortex GABAergic interneuron migration (GO:0021853)	6	1	0.14	+	7.11	0.15	1	Cluster 1
cell motility involved in cerebral cortex radial glia guided migration (GO:0021814)	6	1	0.14	+	7.11	0.15	1	Cluster 1
fibroblast activation (GO:0072537)	6	1	0.14	+	7.11	0.15	1	Cluster 1
determination of left/right asymmetry in lateral mesoderm (GO:0003140)	6	1	0.14	+	7.11	0.15	1	Cluster 1
regulation of synaptic vesicle transport (GO:1902803)	6	1	0.14	+	7.11	0.15	1	Cluster 1
negative regulation of lipase activity (GO:0060192)	18	3	0.42	+	7.11	0.0117	0.242	Cluster 1
neurotransmitter receptor transport (GO:0099637)	42	7	0.98	+	7.11	0.000119	0.00582	Cluster 1
negative regulation of neuron projection regeneration (GO:0070571)	18	3	0.42	+	7.11	0.0117	0.242	Cluster 1
protein localization to synapse (GO:0035418)	78	13	1.83	+	7.11	1.55e-07	1.47e-05	Cluster 1
central nervous system neuron axonogenesis (GO:0021955)	42	7	0.98	+	7.11	0.000119	0.00581	Cluster 1
regulation of extent of cell growth (GO:0061387)	128	21	3	+	7	3.11e-11	4.82e-09	Cluster 1
synapse assembly (GO:0007416)	86	14	2.02	+	6.94	6.71e-08	6.84e-06	Cluster 1
negative regulation of axonogenesis (GO:0050771)	68	11	1.59	+	6.9	1.82e-06	0.000141	Cluster 1
dendrite development (GO:0016358)	136	22	3.19	+	6.9	1.35e-11	2.24e-09	Cluster 1
regulation of receptor localization to synapse (GO:1902683)	25	4	0.59	+	6.82	0.0041	0.111	Cluster 1
regulation of postsynapse organization (GO:0099175)	132	21	3.09	+	6.79	5.2e-11	7.81e-09	Cluster 1
ventricular septum morphogenesis (GO:0060412)	44	7	1.03	+	6.79	0.000154	0.00732	Cluster 1
neurotransmitter secretion (GO:0007269)	88	14	2.06	+	6.79	8.66e-08	8.71e-06	Cluster 1
signal release from synapse (GO:0099643)	88	14	2.06	+	6.79	8.66e-08	8.65e-06	Cluster 1
glial cell migration (GO:0008347)	44	7	1.03	+	6.79	0.000154	0.0073	Cluster 1
regulation of axonogenesis (GO:0050770)	208	33	4.88	+	6.77	1.59e-16	4.06e-14	Cluster 1
cerebral cortex radially oriented cell migration (GO:0021799)	38	6	0.89	+	6.73	0.000473	0.0195	Cluster 1
regulation of mammary gland epithelial cell proliferation (GO:0033599)	19	3	0.45	+	6.73	0.0133	0.269	Cluster 1
synaptic transmission, GABAergic (GO:0051932)	19	3	0.45	+	6.73	0.0133	0.269	Cluster 1
regulation of postsynaptic neurotransmitter receptor activity (GO:0098962)	19	3	0.45	+	6.73	0.0133	0.269	Cluster 1
retinal ganglion cell axon guidance (GO:0031290)	19	3	0.45	+	6.73	0.0133	0.268	Cluster 1
regulation of release of sequestered calcium ion into cytosol by sarcoplasmic reticulum (GO:0010880)	19	3	0.45	+	6.73	0.0133	0.268	Cluster 1
regulation of synaptic vesicle exocytosis (GO:2000300)	103	16	2.41	+	6.63	1.4e-08	1.61e-06	Cluster 1
negative regulation of protein-containing complex disassembly (GO:0043242)	84	13	1.97	+	6.6	3.32e-07	2.95e-05	Cluster 1
respiratory burst (GO:0045730)	13	2	0.3	+	6.56	0.0452	0.599	Cluster 1
commissural neuron axon guidance (GO:0071679)	13	2	0.3	+	6.56	0.0452	0.599	Cluster 1
regulation of cellular amino acid metabolic process (GO:0006521)	13	2	0.3	+	6.56	0.0452	0.598	Cluster 1
semaphorin-plexin signaling pathway involved in neuron projection guidance (GO:1902285)	13	2	0.3	+	6.56	0.0452	0.598	Cluster 1
endosome to plasma membrane protein transport (GO:0099638)	13	2	0.3	+	6.56	0.0452	0.597	Cluster 1
positive regulation of keratinocyte migration (GO:0051549)	13	2	0.3	+	6.56	0.0452	0.597	Cluster 1
neuron projection arborization (GO:0140058)	13	2	0.3	+	6.56	0.0452	0.596	Cluster 1
regulation of cardiac muscle cell action potential (GO:0098901)	26	4	0.61	+	6.56	0.00465	0.125	Cluster 1
regulation of modification of postsynaptic structure (GO:0099159)	13	2	0.3	+	6.56	0.0452	0.596	Cluster 1
astral microtubule organization (GO:0030953)	13	2	0.3	+	6.56	0.0452	0.595	Cluster 1
auditory behavior (GO:0031223)	13	2	0.3	+	6.56	0.0452	0.595	Cluster 1
positive regulation of membrane depolarization (GO:1904181)	13	2	0.3	+	6.56	0.0452	0.594	Cluster 1
regulation of anion channel activity (GO:0010359)	13	2	0.3	+	6.56	0.0452	0.594	Cluster 1
axonogenesis (GO:0007409)	352	54	8.25	+	6.54	9.68e-26	5.09e-23	Cluster 1
regulation of axon guidance (GO:1902667)	46	7	1.08	+	6.49	0.000197	0.00896	Cluster 1
axon development (GO:0061564)	383	58	8.98	+	6.46	2.45e-27	1.38e-24	Cluster 1
regulation of synaptic vesicle cycle (GO:0098693)	146	22	3.42	+	6.43	4.62e-11	7.02e-09	Cluster 1
regulation of axon extension (GO:0030516)	113	17	2.65	+	6.42	7.62e-09	9.05e-07	Cluster 1
negative regulation of sodium ion transport (GO:0010766)	20	3	0.47	+	6.4	0.0151	0.292	Cluster 1
regulation of protein depolymerization (GO:1901879)	94	14	2.2	+	6.35	1.79e-07	1.68e-05	Cluster 1
negative regulation of axon extension (GO:0030517)	47	7	1.1	+	6.35	0.000222	0.00998	Cluster 1
positive regulation of cell morphogenesis involved in differentiation (GO:0010770)	188	28	4.41	+	6.35	1.32e-13	2.82e-11	Cluster 1
positive regulation of neurotransmitter secretion (GO:0001956)	27	4	0.63	+	6.32	0.00525	0.136	Cluster 1
regulation of sodium ion transmembrane transporter activity (GO:2000649)	54	8	1.27	+	6.32	8.2e-05	0.0043	Cluster 1
neuron projection morphogenesis (GO:0048812)	481	71	11.28	+	6.3	9.39e-33	1.35e-29	Cluster 1
central nervous system neuron development (GO:0021954)	95	14	2.23	+	6.29	2.02e-07	1.86e-05	Cluster 1
telencephalon cell migration (GO:0022029)	68	10	1.59	+	6.27	1.14e-05	0.000752	Cluster 1
neuron projection extension (GO:1990138)	68	10	1.59	+	6.27	1.14e-05	0.000749	Cluster 1
negative regulation of protein polymerization (GO:0032272)	75	11	1.76	+	6.26	4.26e-06	0.000313	Cluster 1
plasma membrane bounded cell projection morphogenesis (GO:0120039)	486	71	11.39	+	6.23	1.68e-32	2.22e-29	Cluster 1
positive regulation of axon extension (GO:0045773)	55	8	1.29	+	6.2	9.21e-05	0.00471	Cluster 1
cell projection morphogenesis (GO:0048858)	492	71	11.53	+	6.16	3.36e-32	3.79e-29	Cluster 1
regulation of dendrite development (GO:0050773)	195	28	4.57	+	6.12	2.95e-13	5.98e-11	Cluster 1
limbic system development (GO:0021761)	98	14	2.3	+	6.09	2.84e-07	2.55e-05	Cluster 1
vesicle docking involved in exocytosis (GO:0006904)	42	6	0.98	+	6.09	0.000762	0.0296	Cluster 1
acrosome reaction (GO:0007340)	21	3	0.49	+	6.09	0.0169	0.318	Cluster 1
regulation of protein targeting to membrane (GO:0090313)	35	5	0.82	+	6.09	0.0021	0.0674	Cluster 1
modification of synaptic structure (GO:0099563)	21	3	0.49	+	6.09	0.0169	0.318	Cluster 1
detection of mechanical stimulus involved in sensory perception of pain (GO:0050966)	21	3	0.49	+	6.09	0.0169	0.318	Cluster 1
presynapse assembly (GO:0099054)	21	3	0.49	+	6.09	0.0169	0.317	Cluster 1
barbed-end actin filament capping (GO:0051016)	21	3	0.49	+	6.09	0.0169	0.317	Cluster 1
neuron maturation (GO:0042551)	42	6	0.98	+	6.09	0.000762	0.0296	Cluster 1
positive regulation of dendritic spine development (GO:0060999)	63	9	1.48	+	6.09	3.83e-05	0.00222	Cluster 1
establishment of apical/basal cell polarity (GO:0035089)	21	3	0.49	+	6.09	0.0169	0.317	Cluster 1
positive regulation of cell-cell adhesion mediated by integrin (GO:0033634)	7	1	0.16	+	6.09	0.169	1	Cluster 1
positive regulation of establishment of endothelial barrier (GO:1903142)	7	1	0.16	+	6.09	0.169	1	Cluster 1
innervation (GO:0060384)	28	4	0.66	+	6.09	0.00589	0.148	Cluster 1
cAMP metabolic process (GO:0046058)	14	2	0.33	+	6.09	0.0508	0.599	Cluster 1
mitotic cell cycle arrest (GO:0071850)	14	2	0.33	+	6.09	0.0508	0.599	Cluster 1
regulation of caveolin-mediated endocytosis (GO:2001286)	7	1	0.16	+	6.09	0.169	1	Cluster 1
positive regulation of podosome assembly (GO:0071803)	14	2	0.33	+	6.09	0.0508	0.598	Cluster 1
dopamine receptor signaling pathway (GO:0007212)	28	4	0.66	+	6.09	0.00589	0.148	Cluster 1
regulation of nuclear-transcribed mRNA poly(A) tail shortening (GO:0060211)	14	2	0.33	+	6.09	0.0508	0.598	Cluster 1
female mating behavior (GO:0060180)	14	2	0.33	+	6.09	0.0508	0.598	Cluster 1
ribonucleoprotein complex disassembly (GO:0032988)	7	1	0.16	+	6.09	0.169	1	Cluster 1
regulation of histone H4-K16 acetylation (GO:2000618)	7	1	0.16	+	6.09	0.169	1	Cluster 1
negative regulation of monocyte chemotactic protein-1 production (GO:0071638)	7	1	0.16	+	6.09	0.169	1	Cluster 1
inhibitory postsynaptic potential (GO:0060080)	14	2	0.33	+	6.09	0.0508	0.597	Cluster 1
embryonic retina morphogenesis in camera-type eye (GO:0060059)	7	1	0.16	+	6.09	0.169	1	Cluster 1
regulation of cellular pH reduction (GO:0032847)	7	1	0.16	+	6.09	0.169	1	Cluster 1
convergent extension involved in organogenesis (GO:0060029)	7	1	0.16	+	6.09	0.169	1	Cluster 1
radial glial cell differentiation (GO:0060019)	14	2	0.33	+	6.09	0.0508	0.597	Cluster 1
histidine metabolic process (GO:0006547)	7	1	0.16	+	6.09	0.169	1	Cluster 1
regulation of ATPase-coupled calcium transmembrane transporter activity (GO:1901894)	7	1	0.16	+	6.09	0.169	1	Cluster 1
negative regulation of cellular amine metabolic process (GO:0033239)	7	1	0.16	+	6.09	0.169	1	Cluster 1
reelin-mediated signaling pathway (GO:0038026)	7	1	0.16	+	6.09	0.169	1	Cluster 1
positive regulation of gamma-aminobutyric acid secretion (GO:0014054)	7	1	0.16	+	6.09	0.169	1	Cluster 1
lens morphogenesis in camera-type eye (GO:0002089)	28	4	0.66	+	6.09	0.00589	0.147	Cluster 1
establishment of endothelial blood-brain barrier (GO:0014045)	7	1	0.16	+	6.09	0.169	1	Cluster 1
regulation of neuron maturation (GO:0014041)	14	2	0.33	+	6.09	0.0508	0.596	Cluster 1
optic cup morphogenesis involved in camera-type eye development (GO:0002072)	7	1	0.16	+	6.09	0.169	1	Cluster 1
mRNA splice site selection (GO:0006376)	28	4	0.66	+	6.09	0.00589	0.147	Cluster 1
heterochromatin organization involved in chromatin silencing (GO:0070868)	7	1	0.16	+	6.09	0.169	1	Cluster 1
aggresome assembly (GO:0070842)	7	1	0.16	+	6.09	0.169	1	Cluster 1
regulation of translation at synapse (GO:0140243)	7	1	0.16	+	6.09	0.169	1	Cluster 1
positive regulation of fibroblast apoptotic process (GO:2000271)	7	1	0.16	+	6.09	0.169	1	Cluster 1
DNA topological change (GO:0006265)	7	1	0.16	+	6.09	0.169	1	Cluster 1
positive regulation of endothelial cell development (GO:1901552)	7	1	0.16	+	6.09	0.169	1	Cluster 1
positive regulation of axon extension involved in axon guidance (GO:0048842)	7	1	0.16	+	6.09	0.169	1	Cluster 1
Cdc42 protein signal transduction (GO:0032488)	7	1	0.16	+	6.09	0.169	1	Cluster 1
regulation of translation at synapse, modulating synaptic transmission (GO:0099547)	7	1	0.16	+	6.09	0.169	1	Cluster 1
histone H4-K16 acetylation (GO:0043984)	14	2	0.33	+	6.09	0.0508	0.596	Cluster 1
negative regulation of histone H3-K4 methylation (GO:0051572)	7	1	0.16	+	6.09	0.169	1	Cluster 1
neurotransmitter receptor transport, postsynaptic endosome to lysosome (GO:0098943)	7	1	0.16	+	6.09	0.169	1	Cluster 1
cellular sphingolipid homeostasis (GO:0090156)	7	1	0.16	+	6.09	0.169	1	Cluster 1
regulation of sprouting of injured axon (GO:0048686)	7	1	0.16	+	6.09	0.169	1	Cluster 1
positive regulation of pigment cell differentiation (GO:0050942)	7	1	0.16	+	6.09	0.169	1	Cluster 1
embryonic camera-type eye morphogenesis (GO:0048596)	28	4	0.66	+	6.09	0.00589	0.147	Cluster 1
lens fiber cell morphogenesis (GO:0070309)	7	1	0.16	+	6.09	0.169	1	Cluster 1
regulation of postsynaptic density assembly (GO:0099151)	14	2	0.33	+	6.09	0.0508	0.595	Cluster 1
inhibition of cysteine-type endopeptidase activity involved in apoptotic process (GO:1990001)	7	1	0.16	+	6.09	0.169	1	Cluster 1
negative regulation of lipoprotein lipase activity (GO:0051005)	7	1	0.16	+	6.09	0.169	1	Cluster 1
intraciliary transport involved in cilium assembly (GO:0035735)	7	1	0.16	+	6.09	0.169	1	Cluster 1
hematopoietic stem cell migration (GO:0035701)	7	1	0.16	+	6.09	0.169	1	Cluster 1
regulation of chemokine-mediated signaling pathway (GO:0070099)	7	1	0.16	+	6.09	0.169	1	Cluster 1
positive regulation of secondary metabolite biosynthetic process (GO:1900378)	7	1	0.16	+	6.09	0.169	1	Cluster 1
autophagic cell death (GO:0048102)	7	1	0.16	+	6.09	0.169	1	Cluster 1
chromatin-mediated maintenance of transcription (GO:0048096)	14	2	0.33	+	6.09	0.0508	0.595	Cluster 1
positive regulation of melanin biosynthetic process (GO:0048023)	7	1	0.16	+	6.09	0.169	1	Cluster 1
cyclic nucleotide catabolic process (GO:0009214)	7	1	0.16	+	6.09	0.169	1	Cluster 1
calcium-independent cell-cell adhesion via plasma membrane cell-adhesion molecules (GO:0016338)	7	1	0.16	+	6.09	0.169	1	Cluster 1
protein localization to microtubule (GO:0035372)	14	2	0.33	+	6.09	0.0508	0.594	Cluster 1
cellular triglyceride homeostasis (GO:0035356)	7	1	0.16	+	6.09	0.169	1	Cluster 1
AV node cell to bundle of His cell signaling (GO:0086027)	7	1	0.16	+	6.09	0.169	1	Cluster 1
AV node cell action potential (GO:0086016)	7	1	0.16	+	6.09	0.169	1	Cluster 1
positive regulation of neuromuscular junction development (GO:1904398)	7	1	0.16	+	6.09	0.169	1	Cluster 1
regulation of neuromuscular junction development (GO:1904396)	14	2	0.33	+	6.09	0.0508	0.594	Cluster 1
regulation of cardiac muscle contraction by calcium ion signaling (GO:0010882)	14	2	0.33	+	6.09	0.0508	0.594	Cluster 1
synaptic vesicle budding from presynaptic endocytic zone membrane (GO:0016185)	7	1	0.16	+	6.09	0.169	1	Cluster 1
regulation of spontaneous synaptic transmission (GO:0150003)	7	1	0.16	+	6.09	0.169	1	Cluster 1
negative regulation of hydrogen peroxide metabolic process (GO:0010727)	7	1	0.16	+	6.09	0.169	1	Cluster 1
endothelial cell fate commitment (GO:0060839)	7	1	0.16	+	6.09	0.169	1	Cluster 1
lymphatic endothelial cell differentiation (GO:0060836)	7	1	0.16	+	6.09	0.169	1	Cluster 1
physiological cardiac muscle hypertrophy (GO:0003301)	14	2	0.33	+	6.09	0.0508	0.593	Cluster 1
skeletal myofibril assembly (GO:0014866)	7	1	0.16	+	6.09	0.169	1	Cluster 1
parallel actin filament bundle assembly (GO:0030046)	7	1	0.16	+	6.09	0.169	1	Cluster 1
fungiform papilla development (GO:0061196)	7	1	0.16	+	6.09	0.169	1	Cluster 1
pulmonary artery morphogenesis (GO:0061156)	7	1	0.16	+	6.09	0.169	1	Cluster 1
cerebellar granule cell precursor proliferation (GO:0021930)	7	1	0.16	+	6.09	0.169	1	Cluster 1
physiological muscle hypertrophy (GO:0003298)	14	2	0.33	+	6.09	0.0508	0.593	Cluster 1
cell proliferation in external granule layer (GO:0021924)	7	1	0.16	+	6.09	0.169	1	Cluster 1
commitment of neuronal cell to specific neuron type in forebrain (GO:0021902)	7	1	0.16	+	6.09	0.169	1	Cluster 1
positive regulation of protein polyubiquitination (GO:1902916)	14	2	0.33	+	6.09	0.0508	0.592	Cluster 1
positive regulation of histone H3-K27 methylation (GO:0061087)	7	1	0.16	+	6.09	0.169	1	Cluster 1
cell growth involved in cardiac muscle cell development (GO:0061049)	14	2	0.33	+	6.09	0.0508	0.592	Cluster 1
endocardium morphogenesis (GO:0003160)	7	1	0.16	+	6.09	0.169	1	Cluster 1
type II pneumocyte differentiation (GO:0060510)	7	1	0.16	+	6.09	0.169	1	Cluster 1
positive regulation of epithelial cell proliferation involved in lung morphogenesis (GO:0060501)	7	1	0.16	+	6.09	0.169	1	Cluster 1
regulation of cell morphogenesis involved in differentiation (GO:0010769)	351	50	8.23	+	6.08	1.27e-22	5.16e-20	Cluster 1
cell morphogenesis involved in neuron differentiation (GO:0048667)	444	63	10.41	+	6.05	3.08e-28	1.87e-25	Cluster 1
regulation of neurotransmitter secretion (GO:0046928)	134	19	3.14	+	6.05	2.42e-09	2.92e-07	Cluster 1
negative regulation of supramolecular fiber organization (GO:1902904)	156	22	3.66	+	6.02	1.45e-10	2.05e-08	Cluster 1
forebrain cell migration (GO:0021885)	71	10	1.66	+	6.01	1.6e-05	0.00101	Cluster 1
negative regulation of cell morphogenesis involved in differentiation (GO:0010771)	100	14	2.34	+	5.97	3.54e-07	3.13e-05	Cluster 1
membrane biogenesis (GO:0044091)	43	6	1.01	+	5.95	0.000852	0.0325	Cluster 1
cell part morphogenesis (GO:0032990)	518	72	12.14	+	5.93	1.01e-31	1.06e-28	Cluster 1
membrane assembly (GO:0071709)	36	5	0.84	+	5.92	0.00235	0.0736	Cluster 1
motor neuron axon guidance (GO:0008045)	36	5	0.84	+	5.92	0.00235	0.0735	Cluster 1
developmental cell growth (GO:0048588)	101	14	2.37	+	5.91	3.95e-07	3.45e-05	Cluster 1
axon guidance (GO:0007411)	232	32	5.44	+	5.88	1.57e-14	3.66e-12	Cluster 1
negative regulation of RNA splicing (GO:0033119)	29	4	0.68	+	5.88	0.00658	0.16	Cluster 1
positive regulation of protein targeting to membrane (GO:0090314)	29	4	0.68	+	5.88	0.00658	0.16	Cluster 1
neuron projection guidance (GO:0097485)	233	32	5.46	+	5.86	1.75e-14	4.01e-12	Cluster 1
regulation of filopodium assembly (GO:0051489)	51	7	1.2	+	5.85	0.000348	0.0149	Cluster 1
microtubule polymerization or depolymerization (GO:0031109)	51	7	1.2	+	5.85	0.000348	0.0148	Cluster 1
synaptic vesicle localization (GO:0097479)	51	7	1.2	+	5.85	0.000348	0.0148	Cluster 1
positive regulation of extracellular matrix organization (GO:1903055)	22	3	0.52	+	5.82	0.0189	0.339	Cluster 1
cell-cell signaling involved in cardiac conduction (GO:0086019)	22	3	0.52	+	5.82	0.0189	0.339	Cluster 1
protein localization to postsynaptic membrane (GO:1903539)	44	6	1.03	+	5.82	0.000949	0.0354	Cluster 1
proximal/distal pattern formation (GO:0009954)	37	5	0.87	+	5.76	0.00262	0.0807	Cluster 1
pallium development (GO:0021543)	156	21	3.66	+	5.74	8.16e-10	1.04e-07	Cluster 1
negative regulation of cytoskeleton organization (GO:0051494)	164	22	3.84	+	5.72	3.42e-10	4.62e-08	Cluster 1
negative regulation of adenylate cyclase activity (GO:0007194)	15	2	0.35	+	5.69	0.0568	0.641	Cluster 1
prepulse inhibition (GO:0060134)	15	2	0.35	+	5.69	0.0568	0.641	Cluster 1
ectodermal placode morphogenesis (GO:0071697)	15	2	0.35	+	5.69	0.0568	0.64	Cluster 1
positive regulation of glutamate secretion (GO:0014049)	15	2	0.35	+	5.69	0.0568	0.64	Cluster 1
histone H3 deacetylation (GO:0070932)	15	2	0.35	+	5.69	0.0568	0.64	Cluster 1
histone H4-K8 acetylation (GO:0043982)	15	2	0.35	+	5.69	0.0568	0.639	Cluster 1
histone H4-K5 acetylation (GO:0043981)	15	2	0.35	+	5.69	0.0568	0.639	Cluster 1
regulation of keratinocyte migration (GO:0051547)	15	2	0.35	+	5.69	0.0568	0.638	Cluster 1
positive regulation of voltage-gated calcium channel activity (GO:1901387)	15	2	0.35	+	5.69	0.0568	0.638	Cluster 1
secretory granule localization (GO:0032252)	15	2	0.35	+	5.69	0.0568	0.637	Cluster 1
regulation of developmental pigmentation (GO:0048070)	15	2	0.35	+	5.69	0.0568	0.637	Cluster 1
magnesium ion homeostasis (GO:0010960)	15	2	0.35	+	5.69	0.0568	0.636	Cluster 1
regulation of macrophage cytokine production (GO:0010935)	15	2	0.35	+	5.69	0.0568	0.636	Cluster 1
negative regulation of keratinocyte proliferation (GO:0010839)	15	2	0.35	+	5.69	0.0568	0.635	Cluster 1
viral budding (GO:0046755)	15	2	0.35	+	5.69	0.0568	0.635	Cluster 1
synaptic vesicle exocytosis (GO:0016079)	60	8	1.41	+	5.69	0.000159	0.0075	Cluster 1
ectodermal placode formation (GO:0060788)	15	2	0.35	+	5.69	0.0568	0.635	Cluster 1
eyelid development in camera-type eye (GO:0061029)	15	2	0.35	+	5.69	0.0568	0.634	Cluster 1
cell growth (GO:0016049)	113	15	2.65	+	5.66	2.53e-07	2.28e-05	Cluster 1
positive regulation of excitatory postsynaptic potential (GO:2000463)	38	5	0.89	+	5.61	0.00291	0.0874	Cluster 1
synaptic transmission, glutamatergic (GO:0035249)	38	5	0.89	+	5.61	0.00291	0.0873	Cluster 1
protein localization to cell junction (GO:1902414)	107	14	2.51	+	5.58	7.41e-07	6.19e-05	Cluster 1
regulation of neuronal synaptic plasticity (GO:0048168)	69	9	1.62	+	5.56	7.27e-05	0.00388	Cluster 1
regulation of postsynaptic membrane organization (GO:1901626)	23	3	0.54	+	5.56	0.021	0.362	Cluster 1
sympathetic nervous system development (GO:0048485)	23	3	0.54	+	5.56	0.021	0.362	Cluster 1
cerebral cortex development (GO:0021987)	108	14	2.53	+	5.53	8.2e-07	6.78e-05	Cluster 1
regulation of histone H3-K4 methylation (GO:0051569)	31	4	0.73	+	5.5	0.00812	0.186	Cluster 1
negative regulation of cardiac muscle tissue growth (GO:0055022)	31	4	0.73	+	5.5	0.00812	0.186	Cluster 1
negative regulation of heart growth (GO:0061117)	31	4	0.73	+	5.5	0.00812	0.186	Cluster 1
positive regulation of dendrite development (GO:1900006)	109	14	2.56	+	5.48	9.06e-07	7.34e-05	Cluster 1
regulation of cardiac muscle cell contraction (GO:0086004)	39	5	0.91	+	5.47	0.00322	0.0929	Cluster 1
regulation of actin filament-based movement (GO:1903115)	47	6	1.1	+	5.45	0.00129	0.0446	Cluster 1
neuron projection development (GO:0031175)	705	90	16.53	+	5.45	4.13e-37	1.09e-33	Cluster 1
positive regulation of neuron projection development (GO:0010976)	369	47	8.65	+	5.43	1.56e-19	5.12e-17	Cluster 1
negative regulation of cell projection organization (GO:0031345)	206	26	4.83	+	5.38	2.86e-11	4.48e-09	Cluster 1
regulation of neurotransmitter transport (GO:0051588)	151	19	3.54	+	5.37	1.41e-08	1.59e-06	Cluster 1
negative regulation of neuron projection development (GO:0010977)	175	22	4.1	+	5.36	1.03e-09	1.29e-07	Cluster 1
negative regulation of cyclin-dependent protein serine/threonine kinase activity (GO:0045736)	24	3	0.56	+	5.33	0.0233	0.394	Cluster 1
regulation of cardiac muscle cell proliferation (GO:0060043)	48	6	1.13	+	5.33	0.00143	0.0489	Cluster 1
establishment of mitochondrion localization (GO:0051654)	24	3	0.56	+	5.33	0.0233	0.394	Cluster 1
cochlea development (GO:0090102)	48	6	1.13	+	5.33	0.00143	0.0488	Cluster 1
regulation of alternative mRNA splicing, via spliceosome (GO:0000381)	72	9	1.69	+	5.33	9.79e-05	0.00494	Cluster 1
secondary palate development (GO:0062009)	24	3	0.56	+	5.33	0.0233	0.394	Cluster 1
neuronal stem cell population maintenance (GO:0097150)	24	3	0.56	+	5.33	0.0233	0.393	Cluster 1
hindgut morphogenesis (GO:0007442)	8	1	0.19	+	5.33	0.188	1	Cluster 1
regulation of maintenance of mitotic sister chromatid cohesion (GO:0034182)	8	1	0.19	+	5.33	0.188	1	Cluster 1
substrate-dependent cell migration, cell extension (GO:0006930)	8	1	0.19	+	5.33	0.188	1	Cluster 1
cerebellar granular layer development (GO:0021681)	16	2	0.38	+	5.33	0.0629	0.688	Cluster 1
regulation of ryanodine-sensitive calcium-release channel activity (GO:0060314)	16	2	0.38	+	5.33	0.0629	0.687	Cluster 1
regulation of ER-associated ubiquitin-dependent protein catabolic process (GO:1903069)	8	1	0.19	+	5.33	0.188	1	Cluster 1
corpus callosum morphogenesis (GO:0021540)	8	1	0.19	+	5.33	0.188	1	Cluster 1
cell proliferation in hindbrain (GO:0021534)	8	1	0.19	+	5.33	0.188	1	Cluster 1
G protein-coupled glutamate receptor signaling pathway (GO:0007216)	16	2	0.38	+	5.33	0.0629	0.687	Cluster 1
epithelial cell fate commitment (GO:0072148)	16	2	0.38	+	5.33	0.0629	0.686	Cluster 1
regulation of genetic imprinting (GO:2000653)	8	1	0.19	+	5.33	0.188	1	Cluster 1
negative regulation of stem cell proliferation (GO:2000647)	16	2	0.38	+	5.33	0.0629	0.686	Cluster 1
phospholipase C-activating dopamine receptor signaling pathway (GO:0060158)	8	1	0.19	+	5.33	0.188	1	Cluster 1
regulation of protein localization to synapse (GO:1902473)	32	4	0.75	+	5.33	0.00898	0.199	Cluster 1
negative regulation of amyloid-beta formation (GO:1902430)	16	2	0.38	+	5.33	0.0629	0.685	Cluster 1
ectodermal placode development (GO:0071696)	16	2	0.38	+	5.33	0.0629	0.685	Cluster 1
synapse maturation (GO:0060074)	16	2	0.38	+	5.33	0.0629	0.684	Cluster 1
convergent extension involved in axis elongation (GO:0060028)	8	1	0.19	+	5.33	0.188	1	Cluster 1
convergent extension involved in gastrulation (GO:0060027)	8	1	0.19	+	5.33	0.188	1	Cluster 1
T-tubule organization (GO:0033292)	8	1	0.19	+	5.33	0.188	1	Cluster 1
negative regulation of cAMP-dependent protein kinase activity (GO:2000480)	8	1	0.19	+	5.33	0.188	1	Cluster 1
neuron projection extension involved in neuron projection guidance (GO:1902284)	8	1	0.19	+	5.33	0.188	1	Cluster 1
N-glycan processing (GO:0006491)	16	2	0.38	+	5.33	0.0629	0.684	Cluster 1
cellular response to X-ray (GO:0071481)	8	1	0.19	+	5.33	0.188	1	Cluster 1
cellular response to hydroperoxide (GO:0071447)	8	1	0.19	+	5.33	0.188	1	Cluster 1
glial cell proliferation (GO:0014009)	16	2	0.38	+	5.33	0.0629	0.684	Cluster 1
regulation of histone deacetylase activity (GO:1901725)	8	1	0.19	+	5.33	0.188	1	Cluster 1
cellular response to caffeine (GO:0071313)	8	1	0.19	+	5.33	0.188	1	Cluster 1
inclusion body assembly (GO:0070841)	8	1	0.19	+	5.33	0.188	1	Cluster 1
basement membrane assembly (GO:0070831)	8	1	0.19	+	5.33	0.188	1	Cluster 1
chromatin maintenance (GO:0070827)	8	1	0.19	+	5.33	0.188	1	Cluster 1
response to L-glutamate (GO:1902065)	8	1	0.19	+	5.33	0.188	1	Cluster 1
regulation of microvillus assembly (GO:0032534)	8	1	0.19	+	5.33	0.188	1	Cluster 1
changes to DNA methylation involved in embryo development (GO:1901538)	8	1	0.19	+	5.33	0.188	1	Cluster 1
phosphatidylserine exposure on apoptotic cell surface (GO:0070782)	8	1	0.19	+	5.33	0.188	1	Cluster 1
axon extension involved in axon guidance (GO:0048846)	8	1	0.19	+	5.33	0.188	1	Cluster 1
positive regulation of neurotransmitter transport (GO:0051590)	32	4	0.75	+	5.33	0.00898	0.199	Cluster 1
semicircular canal morphogenesis (GO:0048752)	8	1	0.19	+	5.33	0.188	1	Cluster 1
positive regulation of Wnt signaling pathway, planar cell polarity pathway (GO:2000096)	8	1	0.19	+	5.33	0.188	1	Cluster 1
negative regulation of oligodendrocyte differentiation (GO:0048715)	16	2	0.38	+	5.33	0.0629	0.683	Cluster 1
positive regulation of filopodium assembly (GO:0051491)	32	4	0.75	+	5.33	0.00898	0.199	Cluster 1
exocytic insertion of neurotransmitter receptor to postsynaptic membrane (GO:0098967)	8	1	0.19	+	5.33	0.188	1	Cluster 1
negative regulation of axon regeneration (GO:0048681)	16	2	0.38	+	5.33	0.0629	0.683	Cluster 1
detection of calcium ion (GO:0005513)	8	1	0.19	+	5.33	0.188	1	Cluster 1
thermoception (GO:0050955)	8	1	0.19	+	5.33	0.188	1	Cluster 1
negative regulation of synaptic transmission, GABAergic (GO:0032229)	8	1	0.19	+	5.33	0.188	1	Cluster 1
regulation of calcium ion import across plasma membrane (GO:1905664)	8	1	0.19	+	5.33	0.188	1	Cluster 1
negative regulation of lipopolysaccharide-mediated signaling pathway (GO:0031665)	8	1	0.19	+	5.33	0.188	1	Cluster 1
activated T cell proliferation (GO:0050798)	8	1	0.19	+	5.33	0.188	1	Cluster 1
negative regulation of actin nucleation (GO:0051126)	8	1	0.19	+	5.33	0.188	1	Cluster 1
modulation by symbiont of host autophagy (GO:0075071)	8	1	0.19	+	5.33	0.188	1	Cluster 1
positive regulation by symbiont of host autophagy (GO:0075044)	8	1	0.19	+	5.33	0.188	1	Cluster 1
regulation of secondary metabolic process (GO:0043455)	16	2	0.38	+	5.33	0.0629	0.682	Cluster 1
peptidyl-serine autophosphorylation (GO:0036289)	8	1	0.19	+	5.33	0.188	1	Cluster 1
regulation of modification of postsynaptic actin cytoskeleton (GO:1905274)	8	1	0.19	+	5.33	0.188	1	Cluster 1
positive regulation of developmental pigmentation (GO:0048087)	8	1	0.19	+	5.33	0.188	1	Cluster 1
DNA damage response, detection of DNA damage (GO:0042769)	8	1	0.19	+	5.33	0.188	1	Cluster 1
negative regulation of transcription by RNA polymerase I (GO:0016479)	8	1	0.19	+	5.33	0.188	1	Cluster 1
ephrin receptor signaling pathway (GO:0048013)	32	4	0.75	+	5.33	0.00898	0.198	Cluster 1
positive regulation of NLRP3 inflammasome complex assembly (GO:1900227)	8	1	0.19	+	5.33	0.188	1	Cluster 1
negative regulation of guanyl-nucleotide exchange factor activity (GO:1905098)	8	1	0.19	+	5.33	0.188	1	Cluster 1
neuroblast division (GO:0055057)	16	2	0.38	+	5.33	0.0629	0.682	Cluster 1
DNA methylation involved in embryo development (GO:0043045)	8	1	0.19	+	5.33	0.188	1	Cluster 1
atrial cardiac muscle tissue morphogenesis (GO:0055009)	8	1	0.19	+	5.33	0.188	1	Cluster 1
peptidyl-lysine deacetylation (GO:0034983)	8	1	0.19	+	5.33	0.188	1	Cluster 1
androgen receptor signaling pathway (GO:0030521)	16	2	0.38	+	5.33	0.0629	0.681	Cluster 1
positive regulation of protein kinase C activity (GO:1900020)	8	1	0.19	+	5.33	0.188	1	Cluster 1
regulation of protein kinase C activity (GO:1900019)	8	1	0.19	+	5.33	0.188	1	Cluster 1
positive regulation of peroxisome proliferator activated receptor signaling pathway (GO:0035360)	8	1	0.19	+	5.33	0.188	1	Cluster 1
regulation of hippo signaling (GO:0035330)	16	2	0.38	+	5.33	0.0629	0.681	Cluster 1
SA node cell to atrial cardiac muscle cell communication (GO:0086070)	8	1	0.19	+	5.33	0.188	1	Cluster 1
SA node cell to atrial cardiac muscle cell signaling (GO:0086018)	8	1	0.19	+	5.33	0.188	1	Cluster 1
SA node cell action potential (GO:0086015)	8	1	0.19	+	5.33	0.188	1	Cluster 1
membrane repolarization during cardiac muscle cell action potential (GO:0086013)	8	1	0.19	+	5.33	0.188	1	Cluster 1
regulation of skeletal muscle acetylcholine-gated channel clustering (GO:1904393)	8	1	0.19	+	5.33	0.188	1	Cluster 1
histone H4-K20 methylation (GO:0034770)	8	1	0.19	+	5.33	0.188	1	Cluster 1
regulation of cardiac conduction (GO:1903779)	16	2	0.38	+	5.33	0.0629	0.68	Cluster 1
regulation of plasma membrane organization (GO:1903729)	16	2	0.38	+	5.33	0.0629	0.68	Cluster 1
regulation of cytoplasmic mRNA processing body assembly (GO:0010603)	8	1	0.19	+	5.33	0.188	1	Cluster 1
mitochondrial respirasome assembly (GO:0097250)	8	1	0.19	+	5.33	0.188	1	Cluster 1
endothelial cell activation (GO:0042118)	8	1	0.19	+	5.33	0.188	1	Cluster 1
regulation of protein localization to cilium (GO:1903564)	8	1	0.19	+	5.33	0.188	1	Cluster 1
negative regulation of Wnt signaling pathway involved in heart development (GO:0003308)	8	1	0.19	+	5.33	0.188	1	Cluster 1
cerebral cortex GABAergic interneuron development (GO:0021894)	8	1	0.19	+	5.33	0.188	1	Cluster 1
regulation of Golgi organization (GO:1903358)	16	2	0.38	+	5.33	0.0629	0.679	Cluster 1
negative regulation of dendritic spine morphogenesis (GO:0061002)	8	1	0.19	+	5.33	0.188	1	Cluster 1
epithelial cell proliferation involved in liver morphogenesis (GO:0072575)	8	1	0.19	+	5.33	0.188	1	Cluster 1
hepatocyte proliferation (GO:0072574)	8	1	0.19	+	5.33	0.188	1	Cluster 1
negative regulation of developmental growth (GO:0048640)	129	16	3.02	+	5.29	2.34e-07	2.13e-05	Cluster 1
telencephalon development (GO:0021537)	242	30	5.67	+	5.29	1.27e-12	2.45e-10	Cluster 1
cellular component morphogenesis (GO:0032989)	606	75	14.21	+	5.28	4.49e-30	3.38e-27	Cluster 1
regulation of synapse organization (GO:0050807)	276	34	6.47	+	5.25	4.59e-14	9.92e-12	Cluster 1
regulation of neuron projection development (GO:0010975)	617	76	14.47	+	5.25	2.36e-30	1.96e-27	Cluster 1
regulation of sodium ion transmembrane transport (GO:1902305)	65	8	1.52	+	5.25	0.000262	0.0115	Cluster 1
cellular response to catecholamine stimulus (GO:0071870)	57	7	1.34	+	5.24	0.000639	0.0256	Cluster 1
cellular response to monoamine stimulus (GO:0071868)	57	7	1.34	+	5.24	0.000639	0.0255	Cluster 1
regulation of axon extension involved in axon guidance (GO:0048841)	33	4	0.77	+	5.17	0.00989	0.216	Cluster 1
cell communication involved in cardiac conduction (GO:0086065)	33	4	0.77	+	5.17	0.00989	0.215	Cluster 1
cardiac muscle cell action potential involved in contraction (GO:0086002)	33	4	0.77	+	5.17	0.00989	0.215	Cluster 1
response to catecholamine (GO:0071869)	58	7	1.36	+	5.15	0.000702	0.0277	Cluster 1
response to monoamine (GO:0071867)	58	7	1.36	+	5.15	0.000702	0.0277	Cluster 1
neurotrophin signaling pathway (GO:0038179)	25	3	0.59	+	5.12	0.0256	0.414	Cluster 1
regulation of non-canonical Wnt signaling pathway (GO:2000050)	25	3	0.59	+	5.12	0.0256	0.414	Cluster 1
presynapse organization (GO:0099172)	25	3	0.59	+	5.12	0.0256	0.413	Cluster 1
positive regulation of amyloid precursor protein catabolic process (GO:1902993)	25	3	0.59	+	5.12	0.0256	0.413	Cluster 1
central nervous system neuron differentiation (GO:0021953)	210	25	4.92	+	5.08	2.12e-10	2.96e-08	Cluster 1
regulation of cell size (GO:0008361)	211	25	4.95	+	5.05	2.32e-10	3.22e-08	Cluster 1
action potential (GO:0001508)	93	11	2.18	+	5.05	2.68e-05	0.00162	Cluster 1
regulation of synapse structure or activity (GO:0050803)	288	34	6.75	+	5.04	1.39e-13	2.93e-11	Cluster 1
locomotor rhythm (GO:0045475)	17	2	0.4	+	5.02	0.0693	0.688	Cluster 1
positive regulation of double-strand break repair via nonhomologous end joining (GO:2001034)	17	2	0.4	+	5.02	0.0693	0.688	Cluster 1
regulation of cAMP-dependent protein kinase activity (GO:2000479)	17	2	0.4	+	5.02	0.0693	0.687	Cluster 1
negative regulation of ATPase activity (GO:0032780)	17	2	0.4	+	5.02	0.0693	0.687	Cluster 1
establishment of epithelial cell apical/basal polarity (GO:0045198)	17	2	0.4	+	5.02	0.0693	0.687	Cluster 1
hematopoietic stem cell proliferation (GO:0071425)	17	2	0.4	+	5.02	0.0693	0.686	Cluster 1
regulation of clathrin-dependent endocytosis (GO:2000369)	17	2	0.4	+	5.02	0.0693	0.686	Cluster 1
regulation of gene expression by genetic imprinting (GO:0006349)	17	2	0.4	+	5.02	0.0693	0.685	Cluster 1
positive regulation of calcineurin-NFAT signaling cascade (GO:0070886)	17	2	0.4	+	5.02	0.0693	0.685	Cluster 1
response to progesterone (GO:0032570)	17	2	0.4	+	5.02	0.0693	0.684	Cluster 1
regulation of cell-cell adhesion mediated by cadherin (GO:2000047)	17	2	0.4	+	5.02	0.0693	0.684	Cluster 1
positive regulation of calcineurin-mediated signaling (GO:0106058)	17	2	0.4	+	5.02	0.0693	0.684	Cluster 1
postsynapse assembly (GO:0099068)	17	2	0.4	+	5.02	0.0693	0.683	Cluster 1
negative regulation of morphogenesis of an epithelium (GO:1905331)	17	2	0.4	+	5.02	0.0693	0.683	Cluster 1
regulation of excitatory synapse assembly (GO:1904889)	17	2	0.4	+	5.02	0.0693	0.682	Cluster 1
regulation of long-term synaptic depression (GO:1900452)	17	2	0.4	+	5.02	0.0693	0.682	Cluster 1
negative regulation of cyclase activity (GO:0031280)	17	2	0.4	+	5.02	0.0693	0.681	Cluster 1
embryonic eye morphogenesis (GO:0048048)	34	4	0.8	+	5.02	0.0109	0.228	Cluster 1
maternal behavior (GO:0042711)	17	2	0.4	+	5.02	0.0693	0.681	Cluster 1
asymmetric cell division (GO:0008356)	17	2	0.4	+	5.02	0.0693	0.681	Cluster 1
regulation of hydrogen peroxide metabolic process (GO:0010310)	17	2	0.4	+	5.02	0.0693	0.68	Cluster 1
pulmonary valve morphogenesis (GO:0003184)	17	2	0.4	+	5.02	0.0693	0.68	Cluster 1
negative regulation of pri-miRNA transcription by RNA polymerase II (GO:1902894)	17	2	0.4	+	5.02	0.0693	0.679	Cluster 1
positive regulation of neuron differentiation (GO:0045666)	469	55	11	+	5	3.49e-21	1.31e-18	Cluster 1
regulation of sodium ion transport (GO:0002028)	94	11	2.2	+	4.99	2.94e-05	0.00176	Cluster 1
exocytic process (GO:0140029)	77	9	1.81	+	4.99	0.000156	0.00738	Cluster 1
brain morphogenesis (GO:0048854)	43	5	1.01	+	4.96	0.00471	0.126	Cluster 1
cytoplasmic microtubule organization (GO:0031122)	69	8	1.62	+	4.95	0.000378	0.0159	Cluster 1
regulation of cell morphogenesis (GO:0022604)	536	62	12.57	+	4.93	1.65e-23	7.06e-21	Cluster 1
neuron development (GO:0048666)	865	100	20.28	+	4.93	5.58e-38	2.2e-34	Cluster 1
negative regulation of cyclin-dependent protein kinase activity (GO:1904030)	26	3	0.61	+	4.92	0.0281	0.441	Cluster 1
microtubule anchoring (GO:0034453)	26	3	0.61	+	4.92	0.0281	0.441	Cluster 1
cerebral cortex neuron differentiation (GO:0021895)	26	3	0.61	+	4.92	0.0281	0.441	Cluster 1
regulation of postsynaptic membrane potential (GO:0060078)	61	7	1.43	+	4.89	0.000922	0.0347	Cluster 1
regulation of amyloid-beta formation (GO:1902003)	35	4	0.82	+	4.87	0.0119	0.245	Cluster 1
negative regulation of actin filament bundle assembly (GO:0032232)	35	4	0.82	+	4.87	0.0119	0.245	Cluster 1
cell proliferation in forebrain (GO:0021846)	35	4	0.82	+	4.87	0.0119	0.245	Cluster 1
regulation of synaptic transmission, glutamatergic (GO:0051966)	79	9	1.85	+	4.86	0.000186	0.00855	Cluster 1
regulation of neuron differentiation (GO:0045664)	782	89	18.33	+	4.85	3.17e-33	5.56e-30	Cluster 1
synapse organization (GO:0050808)	299	34	7.01	+	4.85	3.67e-13	7.34e-11	Cluster 1
positive regulation of cell projection organization (GO:0031346)	475	54	11.14	+	4.85	2.96e-20	1.06e-17	Cluster 1
neurotransmitter transport (GO:0006836)	132	15	3.09	+	4.85	1.52e-06	0.000119	Cluster 1
forebrain development (GO:0030900)	379	43	8.89	+	4.84	2.67e-16	6.68e-14	Cluster 1
cell morphogenesis involved in differentiation (GO:0000904)	573	65	13.43	+	4.84	3.38e-24	1.67e-21	Cluster 1
regulation of neurotransmitter levels (GO:0001505)	256	29	6	+	4.83	2.23e-11	3.6e-09	Cluster 1
vesicle docking (GO:0048278)	62	7	1.45	+	4.82	0.00101	0.0365	Cluster 1
positive regulation of cardiac muscle cell differentiation (GO:2000727)	27	3	0.63	+	4.74	0.0307	0.472	Cluster 1
negative regulation of axon extension involved in axon guidance (GO:0048843)	27	3	0.63	+	4.74	0.0307	0.472	Cluster 1
cochlea morphogenesis (GO:0090103)	27	3	0.63	+	4.74	0.0307	0.472	Cluster 1
circadian behavior (GO:0048512)	27	3	0.63	+	4.74	0.0307	0.471	Cluster 1
positive regulation of potassium ion transmembrane transporter activity (GO:1901018)	27	3	0.63	+	4.74	0.0307	0.471	Cluster 1
response to lead ion (GO:0010288)	9	1	0.21	+	4.74	0.207	1	Cluster 1
maintenance of DNA methylation (GO:0010216)	9	1	0.21	+	4.74	0.207	1	Cluster 1
striatum development (GO:0021756)	18	2	0.42	+	4.74	0.0759	0.732	Cluster 1
positive regulation of AMPA receptor activity (GO:2000969)	9	1	0.21	+	4.74	0.207	1	Cluster 1
positive regulation of homotypic cell-cell adhesion (GO:0034112)	9	1	0.21	+	4.74	0.207	1	Cluster 1
positive regulation of endothelial cell differentiation (GO:0045603)	18	2	0.42	+	4.74	0.0759	0.732	Cluster 1
regulation of maintenance of sister chromatid cohesion (GO:0034091)	9	1	0.21	+	4.74	0.207	1	Cluster 1
positive regulation of gamma-delta T cell differentiation (GO:0045588)	9	1	0.21	+	4.74	0.207	1	Cluster 1
regulation of podosome assembly (GO:0071801)	18	2	0.42	+	4.74	0.0759	0.731	Cluster 1
dentate gyrus development (GO:0021542)	18	2	0.42	+	4.74	0.0759	0.731	Cluster 1
positive regulation of protein localization to synapse (GO:1902474)	9	1	0.21	+	4.74	0.207	1	Cluster 1
embryonic process involved in female pregnancy (GO:0060136)	9	1	0.21	+	4.74	0.207	1	Cluster 1
positive regulation of cell cycle checkpoint (GO:1901978)	9	1	0.21	+	4.74	0.207	1	Cluster 1
metaphase/anaphase transition of mitotic cell cycle (GO:0007091)	9	1	0.21	+	4.74	0.207	1	Cluster 1
neuron migration (GO:0001764)	144	16	3.38	+	4.74	8.95e-07	7.29e-05	Cluster 1
positive regulation of protein depolymerization (GO:1901881)	18	2	0.42	+	4.74	0.0759	0.731	Cluster 1
metaphase/anaphase transition of cell cycle (GO:0044784)	9	1	0.21	+	4.74	0.207	1	Cluster 1
adenosine to inosine editing (GO:0006382)	9	1	0.21	+	4.74	0.207	1	Cluster 1
calcium ion export (GO:1901660)	9	1	0.21	+	4.74	0.207	1	Cluster 1
protein transport within lipid bilayer (GO:0032594)	9	1	0.21	+	4.74	0.207	1	Cluster 1
relaxation of smooth muscle (GO:0044557)	9	1	0.21	+	4.74	0.207	1	Cluster 1
cardiac muscle cell membrane repolarization (GO:0099622)	9	1	0.21	+	4.74	0.207	1	Cluster 1
otolith development (GO:0048840)	9	1	0.21	+	4.74	0.207	1	Cluster 1
neurotransmitter receptor internalization (GO:0099590)	18	2	0.42	+	4.74	0.0759	0.73	Cluster 1
regulation of hair follicle maturation (GO:0048819)	9	1	0.21	+	4.74	0.207	1	Cluster 1
chemical synaptic transmission, postsynaptic (GO:0099565)	45	5	1.06	+	4.74	0.00561	0.143	Cluster 1
positive regulation of extracellular matrix assembly (GO:1901203)	9	1	0.21	+	4.74	0.207	1	Cluster 1
progesterone receptor signaling pathway (GO:0050847)	9	1	0.21	+	4.74	0.207	1	Cluster 1
histone H3-K14 acetylation (GO:0044154)	9	1	0.21	+	4.74	0.207	1	Cluster 1
nuclear pore complex assembly (GO:0051292)	9	1	0.21	+	4.74	0.207	1	Cluster 1
positive regulation of lipopolysaccharide-mediated signaling pathway (GO:0031666)	9	1	0.21	+	4.74	0.207	1	Cluster 1
synaptic vesicle transport (GO:0048489)	45	5	1.06	+	4.74	0.00561	0.143	Cluster 1
presynaptic modulation of chemical synaptic transmission (GO:0099171)	18	2	0.42	+	4.74	0.0759	0.73	Cluster 1
regulation of postsynaptic specialization assembly (GO:0099150)	18	2	0.42	+	4.74	0.0759	0.729	Cluster 1
paraxial mesoderm formation (GO:0048341)	9	1	0.21	+	4.74	0.207	1	Cluster 1
regulation of postsynaptic membrane neurotransmitter receptor levels (GO:0099072)	63	7	1.48	+	4.74	0.0011	0.0395	Cluster 1
insulin secretion involved in cellular response to glucose stimulus (GO:0035773)	9	1	0.21	+	4.74	0.207	1	Cluster 1
regulation of modification of synaptic structure (GO:1905244)	18	2	0.42	+	4.74	0.0759	0.729	Cluster 1
regulation of protein localization to nucleolus (GO:1904749)	9	1	0.21	+	4.74	0.207	1	Cluster 1
inactivation of MAPK activity (GO:0000188)	18	2	0.42	+	4.74	0.0759	0.728	Cluster 1
snRNA transcription by RNA polymerase III (GO:0042796)	9	1	0.21	+	4.74	0.207	1	Cluster 1
hepatocyte growth factor receptor signaling pathway (GO:0048012)	9	1	0.21	+	4.74	0.207	1	Cluster 1
positive regulation of nuclear-transcribed mRNA catabolic process, deadenylation-dependent decay (GO:1900153)	18	2	0.42	+	4.74	0.0759	0.728	Cluster 1
cardiac myofibril assembly (GO:0055003)	18	2	0.42	+	4.74	0.0759	0.727	Cluster 1
exocrine pancreas development (GO:0031017)	9	1	0.21	+	4.74	0.207	1	Cluster 1
cardiac muscle cell contraction (GO:0086003)	36	4	0.84	+	4.74	0.013	0.263	Cluster 1
regulation of dopaminergic neuron differentiation (GO:1904338)	9	1	0.21	+	4.74	0.207	1	Cluster 1
hindgut development (GO:0061525)	9	1	0.21	+	4.74	0.207	1	Cluster 1
regulation of postsynapse assembly (GO:0150052)	18	2	0.42	+	4.74	0.0759	0.727	Cluster 1
regulation of hydrogen peroxide biosynthetic process (GO:0010728)	9	1	0.21	+	4.74	0.207	1	Cluster 1
positive regulation of gamma-delta T cell activation (GO:0046645)	9	1	0.21	+	4.74	0.207	1	Cluster 1
inhibition of cysteine-type endopeptidase activity (GO:0097340)	9	1	0.21	+	4.74	0.207	1	Cluster 1
venous blood vessel development (GO:0060841)	18	2	0.42	+	4.74	0.0759	0.727	Cluster 1
myotube differentiation involved in skeletal muscle regeneration (GO:0014908)	9	1	0.21	+	4.74	0.207	1	Cluster 1
pericardium morphogenesis (GO:0003344)	9	1	0.21	+	4.74	0.207	1	Cluster 1
parental behavior (GO:0060746)	18	2	0.42	+	4.74	0.0759	0.726	Cluster 1
regulation of mesenchymal cell proliferation (GO:0010464)	45	5	1.06	+	4.74	0.00561	0.142	Cluster 1
corticospinal tract morphogenesis (GO:0021957)	9	1	0.21	+	4.74	0.207	1	Cluster 1
negative regulation of amyloid precursor protein catabolic process (GO:1902992)	18	2	0.42	+	4.74	0.0759	0.726	Cluster 1
atrial cardiac muscle tissue development (GO:0003228)	9	1	0.21	+	4.74	0.207	1	Cluster 1
mesenchymal-epithelial cell signaling (GO:0060638)	9	1	0.21	+	4.74	0.207	1	Cluster 1
lateral sprouting from an epithelium (GO:0060601)	9	1	0.21	+	4.74	0.207	1	Cluster 1
negative regulation of glial cell apoptotic process (GO:0034351)	9	1	0.21	+	4.74	0.207	1	Cluster 1
interneuron migration from the subpallium to the cortex (GO:0021830)	9	1	0.21	+	4.74	0.207	1	Cluster 1
diaphragm development (GO:0060539)	9	1	0.21	+	4.74	0.207	1	Cluster 1
regulation of protein-containing complex disassembly (GO:0043244)	128	14	3	+	4.67	5.06e-06	0.000367	Cluster 1
negative regulation of chemotaxis (GO:0050922)	55	6	1.29	+	4.65	0.00269	0.0827	Cluster 1
negative regulation of neuron differentiation (GO:0045665)	257	28	6.03	+	4.65	1.13e-10	1.63e-08	Cluster 1
spliceosomal complex assembly (GO:0000245)	46	5	1.08	+	4.64	0.00611	0.151	Cluster 1
excitatory postsynaptic potential (GO:0060079)	37	4	0.87	+	4.61	0.0141	0.278	Cluster 1
dendritic spine development (GO:0060996)	37	4	0.87	+	4.61	0.0141	0.277	Cluster 1
regulation of plasma membrane bounded cell projection organization (GO:0120035)	791	85	18.54	+	4.58	4.44e-30	3.51e-27	Cluster 1
positive regulation of cyclin-dependent protein serine/threonine kinase activity (GO:0045737)	28	3	0.66	+	4.57	0.0334	0.505	Cluster 1
negative regulation of axon guidance (GO:1902668)	28	3	0.66	+	4.57	0.0334	0.504	Cluster 1
negative regulation of neural precursor cell proliferation (GO:2000178)	28	3	0.66	+	4.57	0.0334	0.504	Cluster 1
modulation of excitatory postsynaptic potential (GO:0098815)	56	6	1.31	+	4.57	0.00292	0.0874	Cluster 1
thymus development (GO:0048538)	56	6	1.31	+	4.57	0.00292	0.0872	Cluster 1
histone lysine demethylation (GO:0070076)	28	3	0.66	+	4.57	0.0334	0.503	Cluster 1
histone demethylation (GO:0016577)	28	3	0.66	+	4.57	0.0334	0.503	Cluster 1
regulation of protein targeting (GO:1903533)	56	6	1.31	+	4.57	0.00292	0.0871	Cluster 1
mitochondrion localization (GO:0051646)	47	5	1.1	+	4.54	0.00663	0.161	Cluster 1
vesicle-mediated transport in synapse (GO:0099003)	141	15	3.31	+	4.54	3.2e-06	0.000237	Cluster 1
regulation of cell projection organization (GO:0031344)	800	85	18.76	+	4.53	9.26e-30	6.36e-27	Cluster 1
stress granule assembly (GO:0034063)	19	2	0.45	+	4.49	0.0826	0.779	Cluster 1
corpus callosum development (GO:0022038)	19	2	0.45	+	4.49	0.0826	0.779	Cluster 1
Sertoli cell development (GO:0060009)	19	2	0.45	+	4.49	0.0826	0.778	Cluster 1
semaphorin-plexin signaling pathway (GO:0071526)	38	4	0.89	+	4.49	0.0153	0.297	Cluster 1
regulation of delayed rectifier potassium channel activity (GO:1902259)	19	2	0.45	+	4.49	0.0826	0.778	Cluster 1
regulation of synaptic transmission, GABAergic (GO:0032228)	38	4	0.89	+	4.49	0.0153	0.296	Cluster 1
negative regulation of lyase activity (GO:0051350)	19	2	0.45	+	4.49	0.0826	0.777	Cluster 1
protein depolymerization (GO:0051261)	38	4	0.89	+	4.49	0.0153	0.296	Cluster 1
sodium ion import across plasma membrane (GO:0098719)	19	2	0.45	+	4.49	0.0826	0.777	Cluster 1
negative regulation of dendrite morphogenesis (GO:0050774)	19	2	0.45	+	4.49	0.0826	0.776	Cluster 1
regulation of ARF protein signal transduction (GO:0032012)	19	2	0.45	+	4.49	0.0826	0.776	Cluster 1
mitochondrion distribution (GO:0048311)	19	2	0.45	+	4.49	0.0826	0.775	Cluster 1
granulocyte differentiation (GO:0030851)	19	2	0.45	+	4.49	0.0826	0.775	Cluster 1
negative regulation of potassium ion transport (GO:0043267)	38	4	0.89	+	4.49	0.0153	0.296	Cluster 1
oligosaccharide metabolic process (GO:0009311)	38	4	0.89	+	4.49	0.0153	0.295	Cluster 1
cardiac muscle cell action potential (GO:0086001)	38	4	0.89	+	4.49	0.0153	0.295	Cluster 1
apoptotic nuclear changes (GO:0030262)	19	2	0.45	+	4.49	0.0826	0.774	Cluster 1
positive regulation of calcium ion-dependent exocytosis (GO:0045956)	19	2	0.45	+	4.49	0.0826	0.774	Cluster 1
endocardial cushion formation (GO:0003272)	19	2	0.45	+	4.49	0.0826	0.773	Cluster 1
positive regulation of myeloid leukocyte cytokine production involved in immune response (GO:0061081)	19	2	0.45	+	4.49	0.0826	0.773	Cluster 1
histone H3-K4 trimethylation (GO:0080182)	19	2	0.45	+	4.49	0.0826	0.773	Cluster 1
aortic valve morphogenesis (GO:0003180)	19	2	0.45	+	4.49	0.0826	0.772	Cluster 1
developmental growth involved in morphogenesis (GO:0060560)	133	14	3.12	+	4.49	7.58e-06	0.000525	Cluster 1
regulation of microtubule cytoskeleton organization (GO:0070507)	201	21	4.71	+	4.46	4.74e-08	4.99e-06	Cluster 1
negative regulation of neurogenesis (GO:0050768)	335	35	7.85	+	4.46	1.53e-12	2.91e-10	Cluster 1
calcium ion import (GO:0070509)	48	5	1.13	+	4.44	0.00719	0.173	Cluster 1
modulation of chemical synaptic transmission (GO:0050804)	530	55	12.43	+	4.43	5.77e-19	1.79e-16	Cluster 1
regulation of trans-synaptic signaling (GO:0099177)	531	55	12.45	+	4.42	6.24e-19	1.89e-16	Cluster 1
regulation of adenylate cyclase activity (GO:0045761)	29	3	0.68	+	4.41	0.0363	0.52	Cluster 1
receptor clustering (GO:0043113)	58	6	1.36	+	4.41	0.00342	0.0974	Cluster 1
positive regulation of cell-substrate junction organization (GO:0150117)	29	3	0.68	+	4.41	0.0363	0.52	Cluster 1
rhythmic behavior (GO:0007622)	29	3	0.68	+	4.41	0.0363	0.519	Cluster 1
neuron differentiation (GO:0030182)	1066	110	24.99	+	4.4	9.67e-38	3.05e-34	Cluster 1
positive regulation of calcium ion transmembrane transporter activity (GO:1901021)	39	4	0.91	+	4.37	0.0166	0.314	Cluster 1
positive regulation of developmental growth (GO:0048639)	215	22	5.04	+	4.36	3.2e-08	3.5e-06	Cluster 1
heterophilic cell-cell adhesion via plasma membrane cell adhesion molecules (GO:0007157)	49	5	1.15	+	4.35	0.00778	0.18	Cluster 1
synaptic signaling (GO:0099536)	402	41	9.42	+	4.35	3.63e-14	8.07e-12	Cluster 1
regulation of neurogenesis (GO:0050767)	962	98	22.55	+	4.35	4.75e-33	7.5e-30	Cluster 1
trans-synaptic signaling (GO:0099537)	365	37	8.56	+	4.32	7.92e-13	1.55e-10	Cluster 1
chemical synaptic transmission (GO:0007268)	347	35	8.14	+	4.3	3.82e-12	7.02e-10	Cluster 1
anterograde trans-synaptic signaling (GO:0098916)	347	35	8.14	+	4.3	3.82e-12	6.94e-10	Cluster 1
negative regulation of protein-containing complex assembly (GO:0031333)	139	14	3.26	+	4.3	1.2e-05	0.000788	Cluster 1
positive regulation of adenylate cyclase activity (GO:0045762)	10	1	0.23	+	4.27	0.225	1	Cluster 1
negative regulation of action potential (GO:0045759)	10	1	0.23	+	4.27	0.225	1	Cluster 1
imidazole-containing compound metabolic process (GO:0052803)	10	1	0.23	+	4.27	0.225	1	Cluster 1
DNA damage response, signal transduction by p53 class mediator resulting in cell cycle arrest (GO:0006977)	10	1	0.23	+	4.27	0.225	1	Cluster 1
cellular component disassembly involved in execution phase of apoptosis (GO:0006921)	20	2	0.47	+	4.27	0.0895	0.784	Cluster 1
positive regulation of megakaryocyte differentiation (GO:0045654)	10	1	0.23	+	4.27	0.225	1	Cluster 1
facial nerve structural organization (GO:0021612)	10	1	0.23	+	4.27	0.225	1	Cluster 1
chaperone-mediated protein transport (GO:0072321)	10	1	0.23	+	4.27	0.225	1	Cluster 1
positive regulation of cation channel activity (GO:2001259)	80	8	1.88	+	4.27	0.000929	0.0348	Cluster 1
neuron-neuron synaptic transmission (GO:0007270)	10	1	0.23	+	4.27	0.225	1	Cluster 1
positive regulation of cytoplasmic translation (GO:2000767)	10	1	0.23	+	4.27	0.225	1	Cluster 1
marginal zone B cell differentiation (GO:0002315)	10	1	0.23	+	4.27	0.225	1	Cluster 1
circadian regulation of gene expression (GO:0032922)	70	7	1.64	+	4.27	0.00192	0.0626	Cluster 1
negative regulation of transforming growth factor beta production (GO:0071635)	10	1	0.23	+	4.27	0.225	1	Cluster 1
vocalization behavior (GO:0071625)	20	2	0.47	+	4.27	0.0895	0.784	Cluster 1
nuclear migration (GO:0007097)	30	3	0.7	+	4.27	0.0392	0.552	Cluster 1
positive regulation of gastrulation (GO:2000543)	10	1	0.23	+	4.27	0.225	1	Cluster 1
neurofilament cytoskeleton organization (GO:0060052)	10	1	0.23	+	4.27	0.225	1	Cluster 1
positive regulation of amino acid transport (GO:0051957)	30	3	0.7	+	4.27	0.0392	0.551	Cluster 1
cell-cell junction maintenance (GO:0045217)	20	2	0.47	+	4.27	0.0895	0.784	Cluster 1
glutamate secretion (GO:0014047)	10	1	0.23	+	4.27	0.225	1	Cluster 1
luteinization (GO:0001553)	10	1	0.23	+	4.27	0.225	1	Cluster 1
negative regulation of T cell differentiation in thymus (GO:0033085)	10	1	0.23	+	4.27	0.225	1	Cluster 1
regulation of bile acid biosynthetic process (GO:0070857)	10	1	0.23	+	4.27	0.225	1	Cluster 1
divalent metal ion export (GO:0070839)	10	1	0.23	+	4.27	0.225	1	Cluster 1
neurotransmitter receptor localization to postsynaptic specialization membrane (GO:0099645)	20	2	0.47	+	4.27	0.0895	0.783	Cluster 1
protein localization to postsynaptic specialization membrane (GO:0099633)	20	2	0.47	+	4.27	0.0895	0.783	Cluster 1
neurotransmitter receptor diffusion trapping (GO:0099628)	10	1	0.23	+	4.27	0.225	1	Cluster 1
histone H3-K27 methylation (GO:0070734)	10	1	0.23	+	4.27	0.225	1	Cluster 1
regulation of establishment of cell polarity (GO:2000114)	20	2	0.47	+	4.27	0.0895	0.782	Cluster 1
regulation of macrophage apoptotic process (GO:2000109)	10	1	0.23	+	4.27	0.225	1	Cluster 1
positive regulation of male gonad development (GO:2000020)	10	1	0.23	+	4.27	0.225	1	Cluster 1
peptidyl-lysine monomethylation (GO:0018026)	10	1	0.23	+	4.27	0.225	1	Cluster 1
N-acetylneuraminate metabolic process (GO:0006054)	10	1	0.23	+	4.27	0.225	1	Cluster 1
negative regulation of stress fiber assembly (GO:0051497)	30	3	0.7	+	4.27	0.0392	0.551	Cluster 1
postsynaptic neurotransmitter receptor diffusion trapping (GO:0098970)	10	1	0.23	+	4.27	0.225	1	Cluster 1
receptor diffusion trapping (GO:0098953)	10	1	0.23	+	4.27	0.225	1	Cluster 1
collateral sprouting (GO:0048668)	10	1	0.23	+	4.27	0.225	1	Cluster 1
positive regulation of synapse maturation (GO:0090129)	10	1	0.23	+	4.27	0.225	1	Cluster 1
leukocyte tethering or rolling (GO:0050901)	20	2	0.47	+	4.27	0.0895	0.782	Cluster 1
primitive streak formation (GO:0090009)	10	1	0.23	+	4.27	0.225	1	Cluster 1
cellular response to cold (GO:0070417)	10	1	0.23	+	4.27	0.225	1	Cluster 1
regulation of vascular endothelial growth factor signaling pathway (GO:1900746)	20	2	0.47	+	4.27	0.0895	0.781	Cluster 1
regulation of lipopolysaccharide-mediated signaling pathway (GO:0031664)	20	2	0.47	+	4.27	0.0895	0.781	Cluster 1
hepatocyte differentiation (GO:0070365)	10	1	0.23	+	4.27	0.225	1	Cluster 1
regulation of mitochondrial outer membrane permeabilization involved in apoptotic signaling pathway (GO:1901028)	20	2	0.47	+	4.27	0.0895	0.78	Cluster 1
regulation of potassium ion transmembrane transporter activity (GO:1901016)	60	6	1.41	+	4.27	0.00399	0.109	Cluster 1
midbrain dopaminergic neuron differentiation (GO:1904948)	10	1	0.23	+	4.27	0.225	1	Cluster 1
alternative mRNA splicing, via spliceosome (GO:0000380)	20	2	0.47	+	4.27	0.0895	0.78	Cluster 1
negative regulation of nitric-oxide synthase activity (GO:0051001)	10	1	0.23	+	4.27	0.225	1	Cluster 1
negative regulation of B cell proliferation (GO:0030889)	20	2	0.47	+	4.27	0.0895	0.78	Cluster 1
negative regulation of actin filament polymerization (GO:0030837)	60	6	1.41	+	4.27	0.00399	0.109	Cluster 1
positive regulation of pseudopodium assembly (GO:0031274)	10	1	0.23	+	4.27	0.225	1	Cluster 1
regulation of oocyte maturation (GO:1900193)	10	1	0.23	+	4.27	0.225	1	Cluster 1
regulation of microtubule binding (GO:1904526)	10	1	0.23	+	4.27	0.225	1	Cluster 1
regulation of nuclear-transcribed mRNA catabolic process, deadenylation-dependent decay (GO:1900151)	20	2	0.47	+	4.27	0.0895	0.779	Cluster 1
positive regulation of receptor binding (GO:1900122)	10	1	0.23	+	4.27	0.225	1	Cluster 1
mitochondrion transport along microtubule (GO:0047497)	20	2	0.47	+	4.27	0.0895	0.779	Cluster 1
post-embryonic camera-type eye development (GO:0031077)	10	1	0.23	+	4.27	0.225	1	Cluster 1
embryonic camera-type eye development (GO:0031076)	40	4	0.94	+	4.27	0.0179	0.326	Cluster 1
chromatin remodeling at centromere (GO:0031055)	10	1	0.23	+	4.27	0.225	1	Cluster 1
negative regulation of cellular response to hypoxia (GO:1900038)	10	1	0.23	+	4.27	0.225	1	Cluster 1
positive regulation of fibroblast migration (GO:0010763)	20	2	0.47	+	4.27	0.0895	0.778	Cluster 1
positive regulation of cGMP-mediated signaling (GO:0010753)	10	1	0.23	+	4.27	0.225	1	Cluster 1
regulation of adipose tissue development (GO:1904177)	10	1	0.23	+	4.27	0.225	1	Cluster 1
establishment of mitochondrion localization, microtubule-mediated (GO:0034643)	20	2	0.47	+	4.27	0.0895	0.778	Cluster 1
zymogen inhibition (GO:0097341)	10	1	0.23	+	4.27	0.225	1	Cluster 1
cardiac neural crest cell development involved in heart development (GO:0061308)	10	1	0.23	+	4.27	0.225	1	Cluster 1
cornea development in camera-type eye (GO:0061303)	10	1	0.23	+	4.27	0.225	1	Cluster 1
semicircular canal development (GO:0060872)	10	1	0.23	+	4.27	0.225	1	Cluster 1
development of secondary female sexual characteristics (GO:0046543)	10	1	0.23	+	4.27	0.225	1	Cluster 1
smooth muscle cell migration (GO:0014909)	10	1	0.23	+	4.27	0.225	1	Cluster 1
desmosome organization (GO:0002934)	10	1	0.23	+	4.27	0.225	1	Cluster 1
regulation of Wnt signaling pathway involved in heart development (GO:0003307)	10	1	0.23	+	4.27	0.225	1	Cluster 1
execution phase of apoptosis (GO:0097194)	40	4	0.94	+	4.27	0.0179	0.326	Cluster 1
microtubule anchoring at centrosome (GO:0034454)	10	1	0.23	+	4.27	0.225	1	Cluster 1
presynaptic membrane assembly (GO:0097105)	10	1	0.23	+	4.27	0.225	1	Cluster 1
regulation of cell maturation (GO:1903429)	30	3	0.7	+	4.27	0.0392	0.55	Cluster 1
substrate-independent telencephalic tangential interneuron migration (GO:0021843)	10	1	0.23	+	4.27	0.225	1	Cluster 1
parturition (GO:0007567)	10	1	0.23	+	4.27	0.225	1	Cluster 1
substrate-independent telencephalic tangential migration (GO:0021826)	10	1	0.23	+	4.27	0.225	1	Cluster 1
liver morphogenesis (GO:0072576)	10	1	0.23	+	4.27	0.225	1	Cluster 1
neuromuscular junction development (GO:0007528)	50	5	1.17	+	4.27	0.0084	0.191	Cluster 1
regulation of developmental growth (GO:0048638)	401	40	9.4	+	4.25	1.46e-13	3.03e-11	Cluster 1
brain development (GO:0007420)	636	63	14.91	+	4.23	1.15e-20	4.22e-18	Cluster 1
cell morphogenesis (GO:0000902)	737	73	17.28	+	4.22	7.13e-24	3.13e-21	Cluster 1
ceramide biosynthetic process (GO:0046513)	51	5	1.2	+	4.18	0.00905	0.2	Cluster 1
glycosphingolipid metabolic process (GO:0006687)	41	4	0.96	+	4.16	0.0193	0.344	Cluster 1
regulation of amyloid precursor protein catabolic process (GO:1902991)	41	4	0.96	+	4.16	0.0193	0.344	Cluster 1
positive regulation of neurogenesis (GO:0050769)	585	57	13.72	+	4.16	1.84e-18	5.28e-16	Cluster 1
acetylcholine receptor signaling pathway (GO:0095500)	31	3	0.73	+	4.13	0.0423	0.571	Cluster 1
protein demethylation (GO:0006482)	31	3	0.73	+	4.13	0.0423	0.57	Cluster 1
positive regulation of cyclin-dependent protein kinase activity (GO:1904031)	31	3	0.73	+	4.13	0.0423	0.57	Cluster 1
protein dealkylation (GO:0008214)	31	3	0.73	+	4.13	0.0423	0.569	Cluster 1
multicellular organismal signaling (GO:0035637)	114	11	2.67	+	4.12	0.000145	0.00694	Cluster 1
negative regulation of nervous system development (GO:0051961)	363	35	8.51	+	4.11	1.22e-11	2.08e-09	Cluster 1
regulation of heart growth (GO:0060420)	83	8	1.95	+	4.11	0.00116	0.0413	Cluster 1
cardiac conduction (GO:0061337)	52	5	1.22	+	4.1	0.00974	0.213	Cluster 1
regulation of protein polymerization (GO:0032271)	229	22	5.37	+	4.1	8.9e-08	8.78e-06	Cluster 1
positive regulation of catecholamine secretion (GO:0033605)	21	2	0.49	+	4.06	0.0966	0.827	Cluster 1
cell migration involved in sprouting angiogenesis (GO:0002042)	21	2	0.49	+	4.06	0.0966	0.827	Cluster 1
positive regulation of amyloid-beta formation (GO:1902004)	21	2	0.49	+	4.06	0.0966	0.826	Cluster 1
positive chemotaxis (GO:0050918)	21	2	0.49	+	4.06	0.0966	0.826	Cluster 1
positive regulation of cell migration involved in sprouting angiogenesis (GO:0090050)	21	2	0.49	+	4.06	0.0966	0.825	Cluster 1
regulation of protein kinase C signaling (GO:0090036)	21	2	0.49	+	4.06	0.0966	0.825	Cluster 1
negative regulation of potassium ion transmembrane transporter activity (GO:1901017)	21	2	0.49	+	4.06	0.0966	0.825	Cluster 1
positive regulation of lymphocyte apoptotic process (GO:0070230)	21	2	0.49	+	4.06	0.0966	0.824	Cluster 1
polarized epithelial cell differentiation (GO:0030859)	21	2	0.49	+	4.06	0.0966	0.824	Cluster 1
ribosomal small subunit assembly (GO:0000028)	21	2	0.49	+	4.06	0.0966	0.823	Cluster 1
negative regulation of cardiac muscle tissue development (GO:0055026)	42	4	0.98	+	4.06	0.0208	0.366	Cluster 1
positive regulation of histone methylation (GO:0031062)	42	4	0.98	+	4.06	0.0208	0.366	Cluster 1
regulation of receptor biosynthetic process (GO:0010869)	21	2	0.49	+	4.06	0.0966	0.823	Cluster 1
positive regulation of sodium ion transport (GO:0010765)	42	4	0.98	+	4.06	0.0208	0.365	Cluster 1
dendritic spine morphogenesis (GO:0060997)	21	2	0.49	+	4.06	0.0966	0.822	Cluster 1
pulmonary valve development (GO:0003177)	21	2	0.49	+	4.06	0.0966	0.822	Cluster 1
regulation of mRNA splicing, via spliceosome (GO:0048024)	116	11	2.72	+	4.04	0.000167	0.00773	Cluster 1
regulation of cell development (GO:0060284)	1105	104	25.91	+	4.01	1.92e-32	2.33e-29	Cluster 1
negative regulation of cell development (GO:0010721)	384	36	9	+	4	1.29e-11	2.17e-09	Cluster 1
regulation of membrane repolarization (GO:0060306)	32	3	0.75	+	4	0.0455	0.551	Cluster 1
synaptic vesicle cycle (GO:0099504)	128	12	3	+	4	9.44e-05	0.00481	Cluster 1
actin filament bundle organization (GO:0061572)	64	6	1.5	+	4	0.00534	0.138	Cluster 1
microtubule polymerization (GO:0046785)	32	3	0.75	+	4	0.0455	0.55	Cluster 1
organelle localization by membrane tethering (GO:0140056)	75	7	1.76	+	3.98	0.00275	0.084	Cluster 1
reproductive behavior (GO:0019098)	43	4	1.01	+	3.97	0.0223	0.381	Cluster 1
negative chemotaxis (GO:0050919)	43	4	1.01	+	3.97	0.0223	0.381	Cluster 1
negative regulation of organ growth (GO:0046621)	43	4	1.01	+	3.97	0.0223	0.38	Cluster 1
regulation of nervous system development (GO:0051960)	1087	101	25.48	+	3.96	4.73e-31	4.4e-28	Cluster 1
head development (GO:0060322)	691	64	16.2	+	3.95	1.33e-19	4.56e-17	Cluster 1
positive regulation of amine transport (GO:0051954)	54	5	1.27	+	3.95	0.0112	0.234	Cluster 1
regulation of long-term synaptic potentiation (GO:1900271)	54	5	1.27	+	3.95	0.0112	0.234	Cluster 1
positive regulation of cardiac muscle tissue development (GO:0055025)	54	5	1.27	+	3.95	0.0112	0.234	Cluster 1
positive regulation of nervous system development (GO:0051962)	659	61	15.45	+	3.95	1.05e-18	3.08e-16	Cluster 1
cardiac muscle cell development (GO:0055013)	65	6	1.52	+	3.94	0.00572	0.144	Cluster 1
regulation of cardiac muscle tissue growth (GO:0055021)	76	7	1.78	+	3.93	0.00295	0.0876	Cluster 1
positive regulation of cell growth (GO:0030307)	186	17	4.36	+	3.9	4.79e-06	0.000351	Cluster 1
generation of neurons (GO:0048699)	1688	154	39.57	+	3.89	6.84e-48	5.4e-44	Cluster 1
localization within membrane (GO:0051668)	99	9	2.32	+	3.88	0.000853	0.0324	Cluster 1
cellular response to acetylcholine (GO:1905145)	33	3	0.77	+	3.88	0.0489	0.581	Cluster 1
response to acetylcholine (GO:1905144)	33	3	0.77	+	3.88	0.0489	0.58	Cluster 1
positive regulation of mRNA splicing, via spliceosome (GO:0048026)	33	3	0.77	+	3.88	0.0489	0.58	Cluster 1
cardiac atrium morphogenesis (GO:0003209)	33	3	0.77	+	3.88	0.0489	0.579	Cluster 1
establishment of endothelial barrier (GO:0061028)	33	3	0.77	+	3.88	0.0489	0.579	Cluster 1
lactation (GO:0007595)	33	3	0.77	+	3.88	0.0489	0.578	Cluster 1
positive regulation of Notch signaling pathway (GO:0045747)	44	4	1.03	+	3.88	0.024	0.401	Cluster 1
removal of superoxide radicals (GO:0019430)	11	1	0.26	+	3.88	0.243	1	Cluster 1
signal transduction involved in mitotic G1 DNA damage checkpoint (GO:0072431)	11	1	0.26	+	3.88	0.243	1	Cluster 1
negative regulation of endothelial cell differentiation (GO:0045602)	11	1	0.26	+	3.88	0.243	1	Cluster 1
positive regulation of integrin activation (GO:0033625)	11	1	0.26	+	3.88	0.243	1	Cluster 1
trigeminal nerve development (GO:0021559)	11	1	0.26	+	3.88	0.243	1	Cluster 1
regulation of cellular response to vascular endothelial growth factor stimulus (GO:1902547)	22	2	0.52	+	3.88	0.104	0.869	Cluster 1
immature B cell differentiation (GO:0002327)	11	1	0.26	+	3.88	0.243	1	Cluster 1
nephric duct morphogenesis (GO:0072178)	11	1	0.26	+	3.88	0.243	1	Cluster 1
intracellular signal transduction involved in G1 DNA damage checkpoint (GO:1902400)	11	1	0.26	+	3.88	0.243	1	Cluster 1
Leydig cell differentiation (GO:0033327)	11	1	0.26	+	3.88	0.243	1	Cluster 1
membrane raft assembly (GO:0001765)	11	1	0.26	+	3.88	0.243	1	Cluster 1
regulation of microtubule motor activity (GO:2000574)	11	1	0.26	+	3.88	0.243	1	Cluster 1
micturition (GO:0060073)	11	1	0.26	+	3.88	0.243	1	Cluster 1
aggressive behavior (GO:0002118)	11	1	0.26	+	3.88	0.243	1	Cluster 1
positive regulation of mitochondrial depolarization (GO:0051901)	11	1	0.26	+	3.88	0.243	1	Cluster 1
negative regulation of delayed rectifier potassium channel activity (GO:1902260)	11	1	0.26	+	3.88	0.243	1	Cluster 1
cellular response to purine-containing compound (GO:0071415)	11	1	0.26	+	3.88	0.243	1	Cluster 1
regulation of glucocorticoid receptor signaling pathway (GO:2000322)	11	1	0.26	+	3.88	0.243	1	Cluster 1
negative regulation of intrinsic apoptotic signaling pathway in response to DNA damage by p53 class mediator (GO:1902166)	11	1	0.26	+	3.88	0.243	1	Cluster 1
protein mono-ADP-ribosylation (GO:0140289)	11	1	0.26	+	3.88	0.243	1	Cluster 1
positive regulation of myoblast proliferation (GO:2000288)	11	1	0.26	+	3.88	0.243	1	Cluster 1
peptidyl-methionine modification (GO:0018206)	11	1	0.26	+	3.88	0.243	1	Cluster 1
maintenance of organelle location (GO:0051657)	11	1	0.26	+	3.88	0.243	1	Cluster 1
positive regulation of transcription from RNA polymerase II promoter involved in cellular response to chemical stimulus (GO:1901522)	22	2	0.52	+	3.88	0.104	0.869	Cluster 1
retrograde trans-synaptic signaling (GO:0098917)	11	1	0.26	+	3.88	0.243	1	Cluster 1
detection of light stimulus involved in sensory perception (GO:0050962)	22	2	0.52	+	3.88	0.104	0.868	Cluster 1
lipid digestion (GO:0044241)	11	1	0.26	+	3.88	0.243	1	Cluster 1
detection of light stimulus involved in visual perception (GO:0050908)	22	2	0.52	+	3.88	0.104	0.868	Cluster 1
positive regulation of protein kinase C signaling (GO:0090037)	11	1	0.26	+	3.88	0.243	1	Cluster 1
activation of protein kinase B activity (GO:0032148)	22	2	0.52	+	3.88	0.104	0.867	Cluster 1
mitochondrial fragmentation involved in apoptotic process (GO:0043653)	11	1	0.26	+	3.88	0.243	1	Cluster 1
regulation of transcription from RNA polymerase II promoter in response to oxidative stress (GO:0043619)	11	1	0.26	+	3.88	0.243	1	Cluster 1
cytoplasmic sequestering of protein (GO:0051220)	22	2	0.52	+	3.88	0.104	0.867	Cluster 1
protein auto-ADP-ribosylation (GO:0070213)	11	1	0.26	+	3.88	0.243	1	Cluster 1
intracellular distribution of mitochondria (GO:0048312)	11	1	0.26	+	3.88	0.243	1	Cluster 1
establishment of protein localization to chromosome (GO:0070199)	11	1	0.26	+	3.88	0.243	1	Cluster 1
sequestering of actin monomers (GO:0042989)	11	1	0.26	+	3.88	0.243	1	Cluster 1
behavioral response to ethanol (GO:0048149)	11	1	0.26	+	3.88	0.243	1	Cluster 1
regulation of pseudopodium assembly (GO:0031272)	11	1	0.26	+	3.88	0.243	1	Cluster 1
snRNA transcription by RNA polymerase II (GO:0042795)	11	1	0.26	+	3.88	0.243	1	Cluster 1
regulation of guanyl-nucleotide exchange factor activity (GO:1905097)	11	1	0.26	+	3.88	0.243	1	Cluster 1
retinal cone cell differentiation (GO:0042670)	11	1	0.26	+	3.88	0.243	1	Cluster 1
ventricular cardiac muscle cell development (GO:0055015)	11	1	0.26	+	3.88	0.243	1	Cluster 1
AV node cell to bundle of His cell communication (GO:0086067)	11	1	0.26	+	3.88	0.243	1	Cluster 1
regulation of deacetylase activity (GO:0150065)	11	1	0.26	+	3.88	0.243	1	Cluster 1
dendrite extension (GO:0097484)	11	1	0.26	+	3.88	0.243	1	Cluster 1
cardiac cell fate commitment (GO:0060911)	11	1	0.26	+	3.88	0.243	1	Cluster 1
cardiac neural crest cell differentiation involved in heart development (GO:0061307)	11	1	0.26	+	3.88	0.243	1	Cluster 1
retinal cone cell development (GO:0046549)	11	1	0.26	+	3.88	0.243	1	Cluster 1
presynaptic membrane organization (GO:0097090)	11	1	0.26	+	3.88	0.243	1	Cluster 1
regulation of histone H3-K27 methylation (GO:0061085)	11	1	0.26	+	3.88	0.243	1	Cluster 1
positive regulation of membrane potential (GO:0045838)	22	2	0.52	+	3.88	0.104	0.866	Cluster 1
secondary heart field specification (GO:0003139)	11	1	0.26	+	3.88	0.243	1	Cluster 1
heart field specification (GO:0003128)	11	1	0.26	+	3.88	0.243	1	Cluster 1
regulation of synaptic plasticity (GO:0048167)	222	20	5.2	+	3.84	8.71e-07	7.13e-05	Cluster 1
regulation of cardiac muscle tissue development (GO:0055024)	100	9	2.34	+	3.84	0.000911	0.0343	Cluster 1
plasma membrane bounded cell projection organization (GO:0120036)	1089	98	25.53	+	3.84	4.35e-29	2.75e-26	Cluster 1
positive regulation of cell development (GO:0010720)	669	60	15.68	+	3.83	8.27e-18	2.29e-15	Cluster 1
transmission of nerve impulse (GO:0019226)	67	6	1.57	+	3.82	0.00655	0.16	Cluster 1
positive regulation of heart growth (GO:0060421)	45	4	1.06	+	3.79	0.0256	0.412	Cluster 1
cellular response to dopamine (GO:1903351)	45	4	1.06	+	3.79	0.0256	0.412	Cluster 1
response to dopamine (GO:1903350)	45	4	1.06	+	3.79	0.0256	0.412	Cluster 1
regulation of animal organ formation (GO:0003156)	45	4	1.06	+	3.79	0.0256	0.411	Cluster 1
regulation of synapse assembly (GO:0051963)	124	11	2.91	+	3.78	0.000285	0.0125	Cluster 1
post-embryonic development (GO:0009791)	124	11	2.91	+	3.78	0.000285	0.0125	Cluster 1
cardiac septum morphogenesis (GO:0060411)	79	7	1.85	+	3.78	0.0036	0.101	Cluster 1
ventricular septum development (GO:0003281)	79	7	1.85	+	3.78	0.0036	0.101	Cluster 1
regulation of regulated secretory pathway (GO:1903305)	192	17	4.5	+	3.78	7.08e-06	0.000497	Cluster 1
startle response (GO:0001964)	34	3	0.8	+	3.76	0.0523	0.608	Cluster 1
actin filament capping (GO:0051693)	34	3	0.8	+	3.76	0.0523	0.607	Cluster 1
establishment of epithelial cell polarity (GO:0090162)	34	3	0.8	+	3.76	0.0523	0.607	Cluster 1
regulation of phospholipase C activity (GO:1900274)	34	3	0.8	+	3.76	0.0523	0.606	Cluster 1
detection of stimulus involved in sensory perception of pain (GO:0062149)	34	3	0.8	+	3.76	0.0523	0.606	Cluster 1
response to antibiotic (GO:0046677)	34	3	0.8	+	3.76	0.0523	0.605	Cluster 1
establishment of cell polarity (GO:0030010)	125	11	2.93	+	3.75	0.000304	0.0131	Cluster 1
actin-mediated cell contraction (GO:0070252)	57	5	1.34	+	3.74	0.0137	0.271	Cluster 1
positive regulation of organ growth (GO:0046622)	57	5	1.34	+	3.74	0.0137	0.271	Cluster 1
positive regulation of synapse assembly (GO:0051965)	80	7	1.88	+	3.73	0.00384	0.106	Cluster 1
membrane docking (GO:0022406)	80	7	1.88	+	3.73	0.00384	0.105	Cluster 1
central nervous system development (GO:0007417)	859	75	20.14	+	3.72	1.72e-21	6.62e-19	Cluster 1
diencephalon development (GO:0021536)	69	6	1.62	+	3.71	0.00745	0.175	Cluster 1
regulation of cardiac muscle contraction (GO:0055117)	69	6	1.62	+	3.71	0.00745	0.175	Cluster 1
virion assembly (GO:0019068)	23	2	0.54	+	3.71	0.111	0.874	Cluster 1
membrane depolarization (GO:0051899)	46	4	1.08	+	3.71	0.0274	0.434	Cluster 1
postsynaptic signal transduction (GO:0098926)	46	4	1.08	+	3.71	0.0274	0.434	Cluster 1
protein heterooligomerization (GO:0051291)	23	2	0.54	+	3.71	0.111	0.874	Cluster 1
regulation of postsynaptic neurotransmitter receptor internalization (GO:0099149)	23	2	0.54	+	3.71	0.111	0.873	Cluster 1
leukocyte adhesion to vascular endothelial cell (GO:0061756)	23	2	0.54	+	3.71	0.111	0.873	Cluster 1
pore complex assembly (GO:0046931)	23	2	0.54	+	3.71	0.111	0.873	Cluster 1
response to auditory stimulus (GO:0010996)	23	2	0.54	+	3.71	0.111	0.872	Cluster 1
response to fluid shear stress (GO:0034405)	23	2	0.54	+	3.71	0.111	0.872	Cluster 1
atrial septum development (GO:0003283)	23	2	0.54	+	3.71	0.111	0.871	Cluster 1
regulation of membrane depolarization (GO:0003254)	46	4	1.08	+	3.71	0.0274	0.433	Cluster 1
endocardial cushion development (GO:0003197)	46	4	1.08	+	3.71	0.0274	0.433	Cluster 1
aortic valve development (GO:0003176)	23	2	0.54	+	3.71	0.111	0.871	Cluster 1
locomotory behavior (GO:0007626)	242	21	5.67	+	3.7	8.18e-07	6.8e-05	Cluster 1
neurogenesis (GO:0022008)	1799	156	42.18	+	3.7	5.7e-46	3e-42	Cluster 1
regulation of exocytosis (GO:0017157)	254	22	5.95	+	3.69	4.62e-07	3.97e-05	Cluster 1
cell projection organization (GO:0030030)	1145	99	26.84	+	3.69	3.97e-28	2.32e-25	Cluster 1
positive regulation of ion transmembrane transporter activity (GO:0032414)	116	10	2.72	+	3.68	0.000656	0.026	Cluster 1
regulation of supramolecular fiber organization (GO:1902903)	372	32	8.72	+	3.67	1.33e-09	1.62e-07	Cluster 1
regulation of homotypic cell-cell adhesion (GO:0034110)	35	3	0.82	+	3.66	0.0558	0.638	Cluster 1
cellular response to cAMP (GO:0071320)	35	3	0.82	+	3.66	0.0558	0.637	Cluster 1
cellular response to nerve growth factor stimulus (GO:1990090)	35	3	0.82	+	3.66	0.0558	0.637	Cluster 1
response to nerve growth factor (GO:1990089)	35	3	0.82	+	3.66	0.0558	0.636	Cluster 1
negative regulation of protein localization to nucleus (GO:1900181)	35	3	0.82	+	3.66	0.0558	0.636	Cluster 1
cardiac muscle tissue growth (GO:0055017)	35	3	0.82	+	3.66	0.0558	0.635	Cluster 1
regulation of heart rate by cardiac conduction (GO:0086091)	35	3	0.82	+	3.66	0.0558	0.635	Cluster 1
regulation of keratinocyte proliferation (GO:0010837)	35	3	0.82	+	3.66	0.0558	0.635	Cluster 1
cell junction maintenance (GO:0034331)	35	3	0.82	+	3.66	0.0558	0.634	Cluster 1
positive regulation of calcium-mediated signaling (GO:0050850)	47	4	1.1	+	3.63	0.0292	0.455	Cluster 1
regulation of microtubule-based process (GO:0032886)	259	22	6.07	+	3.62	6.27e-07	5.32e-05	Cluster 1
regulation of actomyosin structure organization (GO:0110020)	106	9	2.49	+	3.62	0.00133	0.0458	Cluster 1
regulation of organ growth (GO:0046620)	118	10	2.77	+	3.61	0.000742	0.029	Cluster 1
regulation of cellular component size (GO:0032535)	414	35	9.71	+	3.61	3.38e-10	4.6e-08	Cluster 1
cardiac cell development (GO:0055006)	71	6	1.66	+	3.6	0.00845	0.192	Cluster 1
regulation of membrane potential (GO:0042391)	450	38	10.55	+	3.6	5.94e-11	8.69e-09	Cluster 1
positive regulation of synaptic transmission (GO:0050806)	190	16	4.45	+	3.59	2.32e-05	0.00142	Cluster 1
establishment or maintenance of cell polarity (GO:0007163)	203	17	4.76	+	3.57	1.39e-05	0.000889	Cluster 1
leukocyte migration involved in inflammatory response (GO:0002523)	24	2	0.56	+	3.55	0.119	0.917	Cluster 1
regulation of cell-cell adhesion mediated by integrin (GO:0033632)	12	1	0.28	+	3.55	0.26	1	Cluster 1
facial nerve morphogenesis (GO:0021610)	12	1	0.28	+	3.55	0.26	1	Cluster 1
regulation of gamma-delta T cell differentiation (GO:0045586)	12	1	0.28	+	3.55	0.26	1	Cluster 1
facial nerve development (GO:0021561)	12	1	0.28	+	3.55	0.26	1	Cluster 1
neuromuscular synaptic transmission (GO:0007274)	24	2	0.56	+	3.55	0.119	0.917	Cluster 1
receptor recycling (GO:0001881)	12	1	0.28	+	3.55	0.26	1	Cluster 1
nephric duct development (GO:0072176)	12	1	0.28	+	3.55	0.26	1	Cluster 1
trophectodermal cell differentiation (GO:0001829)	24	2	0.56	+	3.55	0.119	0.916	Cluster 1
negative regulation of activin receptor signaling pathway (GO:0032926)	12	1	0.28	+	3.55	0.26	1	Cluster 1
positive regulation of MHC class II biosynthetic process (GO:0045348)	12	1	0.28	+	3.55	0.26	1	Cluster 1
cytoplasm organization (GO:0007028)	12	1	0.28	+	3.55	0.26	1	Cluster 1
vagina development (GO:0060068)	12	1	0.28	+	3.55	0.26	1	Cluster 1
Sertoli cell differentiation (GO:0060008)	24	2	0.56	+	3.55	0.119	0.916	Cluster 1
leptin-mediated signaling pathway (GO:0033210)	12	1	0.28	+	3.55	0.26	1	Cluster 1
nodal signaling pathway (GO:0038092)	12	1	0.28	+	3.55	0.26	1	Cluster 1
left/right axis specification (GO:0070986)	12	1	0.28	+	3.55	0.26	1	Cluster 1
positive regulation of hair follicle development (GO:0051798)	12	1	0.28	+	3.55	0.26	1	Cluster 1
regulation of single stranded viral RNA replication via double stranded DNA intermediate (GO:0045091)	12	1	0.28	+	3.55	0.26	1	Cluster 1
cellular response to ATP (GO:0071318)	12	1	0.28	+	3.55	0.26	1	Cluster 1
muscle cell proliferation (GO:0033002)	24	2	0.56	+	3.55	0.119	0.915	Cluster 1
peripheral nervous system neuron development (GO:0048935)	12	1	0.28	+	3.55	0.26	1	Cluster 1
peripheral nervous system neuron differentiation (GO:0048934)	12	1	0.28	+	3.55	0.26	1	Cluster 1
positive regulation of feeding behavior (GO:2000253)	12	1	0.28	+	3.55	0.26	1	Cluster 1
peptidyl-S-diacylglycerol-L-cysteine biosynthetic process from peptidyl-cysteine (GO:0018231)	24	2	0.56	+	3.55	0.119	0.915	Cluster 1
peptidyl-L-cysteine S-palmitoylation (GO:0018230)	24	2	0.56	+	3.55	0.119	0.914	Cluster 1
negative regulation of excitatory postsynaptic potential (GO:0090394)	12	1	0.28	+	3.55	0.26	1	Cluster 1
positive regulation of DNA-dependent DNA replication (GO:2000105)	12	1	0.28	+	3.55	0.26	1	Cluster 1
smooth muscle tissue development (GO:0048745)	24	2	0.56	+	3.55	0.119	0.914	Cluster 1
notochord morphogenesis (GO:0048570)	12	1	0.28	+	3.55	0.26	1	Cluster 1
protein desumoylation (GO:0016926)	12	1	0.28	+	3.55	0.26	1	Cluster 1
dicarboxylic acid catabolic process (GO:0043649)	12	1	0.28	+	3.55	0.26	1	Cluster 1
tetrahydrofolate interconversion (GO:0035999)	12	1	0.28	+	3.55	0.26	1	Cluster 1
tongue morphogenesis (GO:0043587)	12	1	0.28	+	3.55	0.26	1	Cluster 1
sarcoplasmic reticulum calcium ion transport (GO:0070296)	12	1	0.28	+	3.55	0.26	1	Cluster 1
lateral mesoderm development (GO:0048368)	12	1	0.28	+	3.55	0.26	1	Cluster 1
cellular response to increased oxygen levels (GO:0036295)	12	1	0.28	+	3.55	0.26	1	Cluster 1
synaptic vesicle budding (GO:0070142)	12	1	0.28	+	3.55	0.26	1	Cluster 1
positive regulation of defense response to bacterium (GO:1900426)	12	1	0.28	+	3.55	0.26	1	Cluster 1
regulation of potassium ion transport (GO:0043266)	108	9	2.53	+	3.55	0.0015	0.0509	Cluster 1
negative regulation of long-term synaptic potentiation (GO:1900272)	12	1	0.28	+	3.55	0.26	1	Cluster 1
negative regulation of mRNA splicing, via spliceosome (GO:0048025)	24	2	0.56	+	3.55	0.119	0.913	Cluster 1
positive regulation of synaptic vesicle endocytosis (GO:1900244)	12	1	0.28	+	3.55	0.26	1	Cluster 1
regulation of histone H3-K9 trimethylation (GO:1900112)	12	1	0.28	+	3.55	0.26	1	Cluster 1
SNARE complex assembly (GO:0035493)	12	1	0.28	+	3.55	0.26	1	Cluster 1
negative regulation of neurotransmitter secretion (GO:0046929)	12	1	0.28	+	3.55	0.26	1	Cluster 1
regulation of protein K63-linked ubiquitination (GO:1900044)	12	1	0.28	+	3.55	0.26	1	Cluster 1
regulation of eating behavior (GO:1903998)	12	1	0.28	+	3.55	0.26	1	Cluster 1
methionine biosynthetic process (GO:0009086)	12	1	0.28	+	3.55	0.26	1	Cluster 1
membrane depolarization during cardiac muscle cell action potential (GO:0086012)	12	1	0.28	+	3.55	0.26	1	Cluster 1
membrane repolarization during action potential (GO:0086011)	12	1	0.28	+	3.55	0.26	1	Cluster 1
sleep (GO:0030431)	12	1	0.28	+	3.55	0.26	1	Cluster 1
regulation of nitric oxide mediated signal transduction (GO:0010749)	12	1	0.28	+	3.55	0.26	1	Cluster 1
regulation of gamma-delta T cell activation (GO:0046643)	12	1	0.28	+	3.55	0.26	1	Cluster 1
establishment of blood-brain barrier (GO:0060856)	12	1	0.28	+	3.55	0.26	1	Cluster 1
urinary bladder smooth muscle contraction (GO:0014832)	12	1	0.28	+	3.55	0.26	1	Cluster 1
exit from mitosis (GO:0010458)	12	1	0.28	+	3.55	0.26	1	Cluster 1
negative regulation of smooth muscle cell apoptotic process (GO:0034392)	12	1	0.28	+	3.55	0.26	1	Cluster 1
mitral valve morphogenesis (GO:0003183)	12	1	0.28	+	3.55	0.26	1	Cluster 1
endocardium development (GO:0003157)	12	1	0.28	+	3.55	0.26	1	Cluster 1
cerebellar Purkinje cell layer development (GO:0021680)	36	3	0.84	+	3.55	0.0595	0.66	Cluster 1
neuronal action potential (GO:0019228)	36	3	0.84	+	3.55	0.0595	0.659	Cluster 1
protein K48-linked ubiquitination (GO:0070936)	60	5	1.41	+	3.55	0.0166	0.314	Cluster 1
nucleus localization (GO:0051647)	36	3	0.84	+	3.55	0.0595	0.659	Cluster 1
regulation of action potential (GO:0098900)	60	5	1.41	+	3.55	0.0166	0.314	Cluster 1
positive regulation of nervous system process (GO:0031646)	84	7	1.97	+	3.55	0.00492	0.13	Cluster 1
positive regulation of cardiocyte differentiation (GO:1905209)	36	3	0.84	+	3.55	0.0595	0.658	Cluster 1
regulation of long-term neuronal synaptic plasticity (GO:0048169)	36	3	0.84	+	3.55	0.0595	0.658	Cluster 1
protein localization to lysosome (GO:0061462)	36	3	0.84	+	3.55	0.0595	0.657	Cluster 1
response to cocaine (GO:0042220)	36	3	0.84	+	3.55	0.0595	0.657	Cluster 1
actin filament organization (GO:0007015)	253	21	5.93	+	3.54	1.59e-06	0.000123	Cluster 1
limb morphogenesis (GO:0035108)	169	14	3.96	+	3.53	8.76e-05	0.00453	Cluster 1
appendage morphogenesis (GO:0035107)	169	14	3.96	+	3.53	8.76e-05	0.00452	Cluster 1
cardiac muscle contraction (GO:0060048)	73	6	1.71	+	3.51	0.00954	0.209	Cluster 1
regulation of histone methylation (GO:0031060)	73	6	1.71	+	3.51	0.00954	0.209	Cluster 1
actin filament bundle assembly (GO:0051017)	61	5	1.43	+	3.5	0.0176	0.321	Cluster 1
regulation of actin filament bundle assembly (GO:0032231)	110	9	2.58	+	3.49	0.00169	0.0566	Cluster 1
regulation of RNA splicing (GO:0043484)	159	13	3.73	+	3.49	0.000175	0.00808	Cluster 1
regulation of oligodendrocyte differentiation (GO:0048713)	49	4	1.15	+	3.48	0.033	0.5	Cluster 1
circadian rhythm (GO:0007623)	135	11	3.17	+	3.48	0.000557	0.0226	Cluster 1
regulation of potassium ion transmembrane transport (GO:1901379)	86	7	2.02	+	3.47	0.00554	0.142	Cluster 1
neural precursor cell proliferation (GO:0061351)	86	7	2.02	+	3.47	0.00554	0.142	Cluster 1
positive regulation of transporter activity (GO:0032411)	123	10	2.88	+	3.47	0.000998	0.0363	Cluster 1
signal release (GO:0023061)	197	16	4.62	+	3.46	3.5e-05	0.00204	Cluster 1
regulation of calcineurin-NFAT signaling cascade (GO:0070884)	37	3	0.87	+	3.46	0.0633	0.683	Cluster 1
peptidyl-lysine trimethylation (GO:0018023)	37	3	0.87	+	3.46	0.0633	0.682	Cluster 1
positive regulation of GTPase activity (GO:0043547)	223	18	5.23	+	3.44	1.25e-05	0.000813	Cluster 1
regulation of cytoskeleton organization (GO:0051493)	560	45	13.13	+	3.43	4.53e-12	8.12e-10	Cluster 1
nervous system development (GO:0007399)	2310	185	54.16	+	3.42	5.23e-51	8.26e-47	Cluster 1
negative regulation of protein acetylation (GO:1901984)	25	2	0.59	+	3.41	0.126	0.962	Cluster 1
regulation of establishment or maintenance of cell polarity (GO:0032878)	25	2	0.59	+	3.41	0.126	0.961	Cluster 1
reflex (GO:0060004)	25	2	0.59	+	3.41	0.126	0.961	Cluster 1
genetic imprinting (GO:0071514)	25	2	0.59	+	3.41	0.126	0.961	Cluster 1
negative regulation of intrinsic apoptotic signaling pathway in response to DNA damage (GO:1902230)	25	2	0.59	+	3.41	0.126	0.96	Cluster 1
positive regulation of focal adhesion assembly (GO:0051894)	25	2	0.59	+	3.41	0.126	0.96	Cluster 1
regulation of glutamate secretion (GO:0014048)	25	2	0.59	+	3.41	0.126	0.959	Cluster 1
positive regulation of RNA splicing (GO:0033120)	50	4	1.17	+	3.41	0.035	0.507	Cluster 1
cellular response to alkaloid (GO:0071312)	25	2	0.59	+	3.41	0.126	0.959	Cluster 1
regulation of histone H3-K9 methylation (GO:0051570)	25	2	0.59	+	3.41	0.126	0.958	Cluster 1
heterochromatin assembly (GO:0031507)	25	2	0.59	+	3.41	0.126	0.958	Cluster 1
epithelial cell differentiation involved in kidney development (GO:0035850)	25	2	0.59	+	3.41	0.126	0.957	Cluster 1
behavioral response to pain (GO:0048266)	25	2	0.59	+	3.41	0.126	0.957	Cluster 1
membrane depolarization during action potential (GO:0086010)	25	2	0.59	+	3.41	0.126	0.956	Cluster 1
adrenal gland development (GO:0030325)	25	2	0.59	+	3.41	0.126	0.956	Cluster 1
neurotransmitter metabolic process (GO:0042133)	25	2	0.59	+	3.41	0.126	0.955	Cluster 1
regulation of protein polyubiquitination (GO:1902914)	25	2	0.59	+	3.41	0.126	0.955	Cluster 1
regulation of protein-containing complex assembly (GO:0043254)	439	35	10.29	+	3.4	1.42e-09	1.73e-07	Cluster 1
protein localization to cell periphery (GO:1990778)	252	20	5.91	+	3.39	5.24e-06	0.000378	Cluster 1
cellular response to carbohydrate stimulus (GO:0071322)	63	5	1.48	+	3.39	0.0198	0.351	Cluster 1
positive regulation of neuron death (GO:1901216)	126	10	2.95	+	3.39	0.00118	0.0421	Cluster 1
cell-cell adhesion via plasma-membrane adhesion molecules (GO:0098742)	190	15	4.45	+	3.37	8.21e-05	0.00429	Cluster 1
heart growth (GO:0060419)	38	3	0.89	+	3.37	0.0672	0.673	Cluster 1
regulation of endothelial cell differentiation (GO:0045601)	38	3	0.89	+	3.37	0.0672	0.673	Cluster 1
negative regulation of animal organ morphogenesis (GO:0110111)	38	3	0.89	+	3.37	0.0672	0.673	Cluster 1
heterochromatin organization (GO:0070828)	38	3	0.89	+	3.37	0.0672	0.672	Cluster 1
regulation of calcineurin-mediated signaling (GO:0106056)	38	3	0.89	+	3.37	0.0672	0.672	Cluster 1
regulation of presynapse organization (GO:0099174)	38	3	0.89	+	3.37	0.0672	0.671	Cluster 1
response to pain (GO:0048265)	38	3	0.89	+	3.37	0.0672	0.671	Cluster 1
regulation of cyclin-dependent protein serine/threonine kinase activity (GO:0000079)	76	6	1.78	+	3.37	0.0114	0.236	Cluster 1
cardiac atrium development (GO:0003230)	38	3	0.89	+	3.37	0.0672	0.67	Cluster 1
establishment of protein localization to plasma membrane (GO:0061951)	51	4	1.2	+	3.35	0.0371	0.528	Cluster 1
establishment or maintenance of apical/basal cell polarity (GO:0035088)	51	4	1.2	+	3.35	0.0371	0.528	Cluster 1
establishment or maintenance of bipolar cell polarity (GO:0061245)	51	4	1.2	+	3.35	0.0371	0.527	Cluster 1
negative regulation of peptide hormone secretion (GO:0090278)	64	5	1.5	+	3.33	0.021	0.361	Cluster 1
peptidyl-threonine phosphorylation (GO:0018107)	77	6	1.81	+	3.32	0.012	0.246	Cluster 1
cell junction organization (GO:0034330)	501	39	11.75	+	3.32	3.03e-10	4.16e-08	Cluster 1
regulation of actin filament-based process (GO:0032970)	412	32	9.66	+	3.31	1.31e-08	1.51e-06	Cluster 1
negative regulation of protein serine/threonine kinase activity (GO:0071901)	116	9	2.72	+	3.31	0.00237	0.074	Cluster 1
limb development (GO:0060173)	194	15	4.55	+	3.3	0.000102	0.0051	Cluster 1
appendage development (GO:0048736)	194	15	4.55	+	3.3	0.000102	0.00508	Cluster 1
thalamus development (GO:0021794)	13	1	0.3	+	3.28	0.277	1	Cluster 1
signal transduction involved in mitotic cell cycle checkpoint (GO:0072413)	13	1	0.3	+	3.28	0.277	1	Cluster 1
ER overload response (GO:0006983)	13	1	0.3	+	3.28	0.277	1	Cluster 1
substrate-dependent cell migration (GO:0006929)	26	2	0.61	+	3.28	0.134	0.963	Cluster 1
cranial nerve structural organization (GO:0021604)	13	1	0.3	+	3.28	0.277	1	Cluster 1
positive regulation of type I interferon-mediated signaling pathway (GO:0060340)	13	1	0.3	+	3.28	0.277	1	Cluster 1
negative regulation of activated T cell proliferation (GO:0046007)	13	1	0.3	+	3.28	0.277	1	Cluster 1
pons development (GO:0021548)	13	1	0.3	+	3.28	0.277	1	Cluster 1
lymph vessel development (GO:0001945)	26	2	0.61	+	3.28	0.134	0.962	Cluster 1
regulation of oocyte development (GO:0060281)	13	1	0.3	+	3.28	0.277	1	Cluster 1
G protein-coupled acetylcholine receptor signaling pathway (GO:0007213)	13	1	0.3	+	3.28	0.277	1	Cluster 1
basement membrane organization (GO:0071711)	26	2	0.61	+	3.28	0.134	0.962	Cluster 1
lymphoid progenitor cell differentiation (GO:0002320)	13	1	0.3	+	3.28	0.277	1	Cluster 1
signal transduction involved in mitotic DNA integrity checkpoint (GO:1902403)	13	1	0.3	+	3.28	0.277	1	Cluster 1
signal transduction involved in mitotic DNA damage checkpoint (GO:1902402)	13	1	0.3	+	3.28	0.277	1	Cluster 1
negative regulation of mesenchymal cell apoptotic process (GO:2001054)	13	1	0.3	+	3.28	0.277	1	Cluster 1
plasma membrane repair (GO:0001778)	13	1	0.3	+	3.28	0.277	1	Cluster 1
endodermal cell fate commitment (GO:0001711)	13	1	0.3	+	3.28	0.277	1	Cluster 1
uterus development (GO:0060065)	26	2	0.61	+	3.28	0.134	0.961	Cluster 1
regulation of attachment of spindle microtubules to kinetochore (GO:0051988)	13	1	0.3	+	3.28	0.277	1	Cluster 1
positive regulation of cell junction assembly (GO:1901890)	117	9	2.74	+	3.28	0.0025	0.0778	Cluster 1
regulation of nuclear cell cycle DNA replication (GO:0033262)	13	1	0.3	+	3.28	0.277	1	Cluster 1
regulation of gamma-aminobutyric acid secretion (GO:0014052)	13	1	0.3	+	3.28	0.277	1	Cluster 1
regulation of respiratory gaseous exchange by nervous system process (GO:0002087)	13	1	0.3	+	3.28	0.277	1	Cluster 1
cellular response to superoxide (GO:0071451)	13	1	0.3	+	3.28	0.277	1	Cluster 1
cellular response to oxygen radical (GO:0071450)	13	1	0.3	+	3.28	0.277	1	Cluster 1
apical protein localization (GO:0045176)	13	1	0.3	+	3.28	0.277	1	Cluster 1
regulation of histone ubiquitination (GO:0033182)	13	1	0.3	+	3.28	0.277	1	Cluster 1
development of secondary sexual characteristics (GO:0045136)	13	1	0.3	+	3.28	0.277	1	Cluster 1
histone H3-K9 demethylation (GO:0033169)	13	1	0.3	+	3.28	0.277	1	Cluster 1
negative regulation of intracellular estrogen receptor signaling pathway (GO:0033147)	13	1	0.3	+	3.28	0.277	1	Cluster 1
cellular response to glucose stimulus (GO:0071333)	52	4	1.22	+	3.28	0.0393	0.55	Cluster 1
positive regulation of chemokine biosynthetic process (GO:0045080)	13	1	0.3	+	3.28	0.277	1	Cluster 1
cellular response to lithium ion (GO:0071285)	13	1	0.3	+	3.28	0.277	1	Cluster 1
maintenance of synapse structure (GO:0099558)	13	1	0.3	+	3.28	0.277	1	Cluster 1
regulation of oogenesis (GO:1905879)	13	1	0.3	+	3.28	0.277	1	Cluster 1
negative regulation of histone H3-K9 methylation (GO:0051573)	13	1	0.3	+	3.28	0.277	1	Cluster 1
regulation of skeletal muscle fiber development (GO:0048742)	13	1	0.3	+	3.28	0.277	1	Cluster 1
positive regulation of oligodendrocyte differentiation (GO:0048714)	26	2	0.61	+	3.28	0.134	0.961	Cluster 1
negative regulation of protein localization to cell surface (GO:2000009)	13	1	0.3	+	3.28	0.277	1	Cluster 1
negative regulation of potassium ion transmembrane transport (GO:1901380)	26	2	0.61	+	3.28	0.134	0.96	Cluster 1
planar cell polarity pathway involved in neural tube closure (GO:0090179)	13	1	0.3	+	3.28	0.277	1	Cluster 1
negative regulation of adenylate cyclase-activating G protein-coupled receptor signaling pathway (GO:0106072)	13	1	0.3	+	3.28	0.277	1	Cluster 1
regulation of extracellular matrix assembly (GO:1901201)	13	1	0.3	+	3.28	0.277	1	Cluster 1
cellular protein complex disassembly (GO:0043624)	52	4	1.22	+	3.28	0.0393	0.55	Cluster 1
retrograde transport, endosome to plasma membrane (GO:1990126)	26	2	0.61	+	3.28	0.134	0.96	Cluster 1
autonomic nervous system development (GO:0048483)	52	4	1.22	+	3.28	0.0393	0.549	Cluster 1
response to magnesium ion (GO:0032026)	13	1	0.3	+	3.28	0.277	1	Cluster 1
paraxial mesoderm morphogenesis (GO:0048340)	13	1	0.3	+	3.28	0.277	1	Cluster 1
positive regulation of autophagy of mitochondrion in response to mitochondrial depolarization (GO:1904925)	13	1	0.3	+	3.28	0.277	1	Cluster 1
negative regulation of plasma membrane bounded cell projection assembly (GO:0120033)	26	2	0.61	+	3.28	0.134	0.959	Cluster 1
cytoplasmic sequestering of transcription factor (GO:0042994)	13	1	0.3	+	3.28	0.277	1	Cluster 1
negative regulation of vascular endothelial growth factor receptor signaling pathway (GO:0030948)	13	1	0.3	+	3.28	0.277	1	Cluster 1
NAD biosynthetic process (GO:0009435)	13	1	0.3	+	3.28	0.277	1	Cluster 1
toxin metabolic process (GO:0009404)	13	1	0.3	+	3.28	0.277	1	Cluster 1
positive regulation of actin filament depolymerization (GO:0030836)	13	1	0.3	+	3.28	0.277	1	Cluster 1
T cell costimulation (GO:0031295)	26	2	0.61	+	3.28	0.134	0.959	Cluster 1
regulation of cyclase activity (GO:0031279)	39	3	0.91	+	3.28	0.0712	0.694	Cluster 1
snRNA transcription (GO:0009301)	13	1	0.3	+	3.28	0.277	1	Cluster 1
positive regulation of hair cycle (GO:0042635)	13	1	0.3	+	3.28	0.277	1	Cluster 1
histone lysine methylation (GO:0034968)	65	5	1.52	+	3.28	0.0222	0.378	Cluster 1
negative regulation of voltage-gated potassium channel activity (GO:1903817)	13	1	0.3	+	3.28	0.277	1	Cluster 1
regulation of bile acid metabolic process (GO:1904251)	13	1	0.3	+	3.28	0.277	1	Cluster 1
regulation of transcription from RNA polymerase II promoter in response to hypoxia (GO:0061418)	13	1	0.3	+	3.28	0.277	1	Cluster 1
plasma membrane tubulation (GO:0097320)	13	1	0.3	+	3.28	0.277	1	Cluster 1
axonal transport of mitochondrion (GO:0019896)	13	1	0.3	+	3.28	0.277	1	Cluster 1
positive regulation of cytoplasmic transport (GO:1903651)	13	1	0.3	+	3.28	0.277	1	Cluster 1
positive regulation of lamellipodium assembly (GO:0010592)	26	2	0.61	+	3.28	0.134	0.959	Cluster 1
negative regulation of transcription from RNA polymerase II promoter in response to stress (GO:0097201)	13	1	0.3	+	3.28	0.277	1	Cluster 1
cellular response to hydroxyurea (GO:0072711)	13	1	0.3	+	3.28	0.277	1	Cluster 1
type B pancreatic cell development (GO:0003323)	13	1	0.3	+	3.28	0.277	1	Cluster 1
lung secretory cell differentiation (GO:0061140)	13	1	0.3	+	3.28	0.277	1	Cluster 1
mammary gland duct morphogenesis (GO:0060603)	39	3	0.91	+	3.28	0.0712	0.693	Cluster 1
regulation of glial cell apoptotic process (GO:0034350)	13	1	0.3	+	3.28	0.277	1	Cluster 1
mitral valve development (GO:0003174)	13	1	0.3	+	3.28	0.277	1	Cluster 1
outflow tract morphogenesis (GO:0003151)	78	6	1.83	+	3.28	0.0127	0.258	Cluster 1
cell junction assembly (GO:0034329)	248	19	5.81	+	3.27	1.43e-05	0.000906	Cluster 1
positive regulation of actin filament bundle assembly (GO:0032233)	66	5	1.55	+	3.23	0.0234	0.394	Cluster 1
negative regulation of striated muscle tissue development (GO:0045843)	66	5	1.55	+	3.23	0.0234	0.394	Cluster 1
positive regulation of regulated secretory pathway (GO:1903307)	66	5	1.55	+	3.23	0.0234	0.393	Cluster 1
regulation of GTPase activity (GO:0043087)	304	23	7.13	+	3.23	2.22e-06	0.000168	Cluster 1
negative regulation of insulin secretion (GO:0046676)	53	4	1.24	+	3.22	0.0415	0.562	Cluster 1
adult locomotory behavior (GO:0008344)	106	8	2.49	+	3.22	0.00476	0.127	Cluster 1
regulated exocytosis (GO:0045055)	120	9	2.81	+	3.2	0.00293	0.0875	Cluster 1
regulation of neuroblast proliferation (GO:1902692)	40	3	0.94	+	3.2	0.0752	0.729	Cluster 1
regulation of dopamine secretion (GO:0014059)	40	3	0.94	+	3.2	0.0752	0.729	Cluster 1
regulation of neuron projection regeneration (GO:0070570)	40	3	0.94	+	3.2	0.0752	0.729	Cluster 1
response to cold (GO:0009409)	40	3	0.94	+	3.2	0.0752	0.728	Cluster 1
negative regulation of actin filament depolymerization (GO:0030835)	40	3	0.94	+	3.2	0.0752	0.728	Cluster 1
response to amyloid-beta (GO:1904645)	40	3	0.94	+	3.2	0.0752	0.727	Cluster 1
regulation of cyclin-dependent protein kinase activity (GO:1904029)	80	6	1.88	+	3.2	0.0141	0.277	Cluster 1
protein localization to plasma membrane (GO:0072659)	201	15	4.71	+	3.18	0.000147	0.00701	Cluster 1
regulation of stress fiber assembly (GO:0051492)	94	7	2.2	+	3.18	0.00861	0.194	Cluster 1
postsynapse organization (GO:0099173)	94	7	2.2	+	3.18	0.00861	0.194	Cluster 1
positive regulation of supramolecular fiber organization (GO:1902905)	188	14	4.41	+	3.18	0.000247	0.0109	Cluster 1
branching involved in mammary gland duct morphogenesis (GO:0060444)	27	2	0.63	+	3.16	0.142	1	Cluster 1
chloride transmembrane transport (GO:1902476)	54	4	1.27	+	3.16	0.0438	0.586	Cluster 1
establishment of planar polarity (GO:0001736)	27	2	0.63	+	3.16	0.142	1	Cluster 1
positive regulation of cardiac muscle cell proliferation (GO:0060045)	27	2	0.63	+	3.16	0.142	1	Cluster 1
cellular response to hexose stimulus (GO:0071331)	54	4	1.27	+	3.16	0.0438	0.585	Cluster 1
actin nucleation (GO:0045010)	27	2	0.63	+	3.16	0.142	1	Cluster 1
synaptic membrane adhesion (GO:0099560)	27	2	0.63	+	3.16	0.142	1	Cluster 1
acid secretion (GO:0046717)	27	2	0.63	+	3.16	0.142	1	Cluster 1
positive regulation of protein maturation (GO:1903319)	27	2	0.63	+	3.16	0.142	1	Cluster 1
clathrin-dependent endocytosis (GO:0072583)	27	2	0.63	+	3.16	0.142	0.999	Cluster 1
nerve development (GO:0021675)	81	6	1.9	+	3.16	0.0149	0.291	Cluster 1
neural crest cell development (GO:0014032)	81	6	1.9	+	3.16	0.0149	0.29	Cluster 1
regulation of calcium ion transmembrane transporter activity (GO:1901019)	81	6	1.9	+	3.16	0.0149	0.29	Cluster 1
positive regulation of growth (GO:0045927)	298	22	6.99	+	3.15	5.32e-06	0.000382	Cluster 1
regulation of ion transmembrane transporter activity (GO:0032412)	258	19	6.05	+	3.14	2.38e-05	0.00145	Cluster 1
regulation of neurotransmitter receptor activity (GO:0099601)	68	5	1.59	+	3.14	0.026	0.416	Cluster 1
negative regulation of ion transmembrane transporter activity (GO:0032413)	68	5	1.59	+	3.14	0.026	0.416	Cluster 1
negative regulation of muscle organ development (GO:0048635)	68	5	1.59	+	3.14	0.026	0.416	Cluster 1
positive regulation of Ras protein signal transduction (GO:0046579)	68	5	1.59	+	3.14	0.026	0.415	Cluster 1
homophilic cell adhesion via plasma membrane adhesion molecules (GO:0007156)	109	8	2.56	+	3.13	0.00556	0.142	Cluster 1
hindbrain development (GO:0030902)	164	12	3.84	+	3.12	0.000777	0.0301	Cluster 1
protein localization to microtubule cytoskeleton (GO:0072698)	41	3	0.96	+	3.12	0.0794	0.753	Cluster 1
positive regulation of endocytosis (GO:0045807)	123	9	2.88	+	3.12	0.00342	0.0976	Cluster 1
roof of mouth development (GO:0060021)	96	7	2.25	+	3.11	0.00954	0.209	Cluster 1
regulation of cell growth (GO:0001558)	426	31	9.99	+	3.1	8.74e-08	8.69e-06	Cluster 1
positive regulation of organic acid transport (GO:0032892)	55	4	1.29	+	3.1	0.0462	0.556	Cluster 1
cellular response to monosaccharide stimulus (GO:0071326)	55	4	1.29	+	3.1	0.0462	0.556	Cluster 1
intraspecies interaction between organisms (GO:0051703)	55	4	1.29	+	3.1	0.0462	0.555	Cluster 1
positive regulation of stress fiber assembly (GO:0051496)	55	4	1.29	+	3.1	0.0462	0.555	Cluster 1
regulation of actin filament depolymerization (GO:0030834)	55	4	1.29	+	3.1	0.0462	0.554	Cluster 1
social behavior (GO:0035176)	55	4	1.29	+	3.1	0.0462	0.554	Cluster 1
growth (GO:0040007)	455	33	10.67	+	3.09	3.59e-08	3.88e-06	Cluster 1
negative regulation of muscle tissue development (GO:1901862)	69	5	1.62	+	3.09	0.0274	0.433	Cluster 1
actin cytoskeleton reorganization (GO:0031532)	69	5	1.62	+	3.09	0.0274	0.432	Cluster 1
regulation of striated muscle contraction (GO:0006942)	83	6	1.95	+	3.08	0.0165	0.313	Cluster 1
heart process (GO:0003015)	97	7	2.27	+	3.08	0.01	0.217	Cluster 1
erythrocyte differentiation (GO:0030218)	97	7	2.27	+	3.08	0.01	0.217	Cluster 1
positive regulation of protein-containing complex assembly (GO:0031334)	222	16	5.2	+	3.07	0.00013	0.00629	Cluster 1
chromatin assembly or disassembly (GO:0006333)	125	9	2.93	+	3.07	0.00378	0.104	Cluster 1
vesicle-mediated transport to the plasma membrane (GO:0098876)	84	6	1.97	+	3.05	0.0173	0.317	Cluster 1
regulation of lyase activity (GO:0051339)	42	3	0.98	+	3.05	0.0837	0.782	Cluster 1
negative regulation of synaptic transmission (GO:0050805)	70	5	1.64	+	3.05	0.0288	0.45	Cluster 1
regulation of mRNA processing (GO:0050684)	154	11	3.61	+	3.05	0.00152	0.0513	Cluster 1
positive regulation of cardiac muscle tissue growth (GO:0055023)	42	3	0.98	+	3.05	0.0837	0.782	Cluster 1
intracellular steroid hormone receptor signaling pathway (GO:0030518)	42	3	0.98	+	3.05	0.0837	0.781	Cluster 1
response to lithium ion (GO:0010226)	14	1	0.33	+	3.05	0.294	1	Cluster 1
nuclear pore organization (GO:0006999)	14	1	0.33	+	3.05	0.294	1	Cluster 1
positive regulation of macrophage differentiation (GO:0045651)	14	1	0.33	+	3.05	0.294	1	Cluster 1
tripartite regional subdivision (GO:0007351)	14	1	0.33	+	3.05	0.294	1	Cluster 1
glomerular epithelial cell differentiation (GO:0072311)	14	1	0.33	+	3.05	0.294	1	Cluster 1
mammary gland epithelial cell proliferation (GO:0033598)	14	1	0.33	+	3.05	0.294	1	Cluster 1
hematopoietic stem cell differentiation (GO:0060218)	14	1	0.33	+	3.05	0.294	1	Cluster 1
establishment of tissue polarity (GO:0007164)	28	2	0.66	+	3.05	0.15	1	Cluster 1
glomerular visceral epithelial cell differentiation (GO:0072112)	14	1	0.33	+	3.05	0.294	1	Cluster 1
regulation of actin cytoskeleton organization (GO:0032956)	364	26	8.53	+	3.05	1.34e-06	0.000107	Cluster 1
glycosylceramide metabolic process (GO:0006677)	14	1	0.33	+	3.05	0.294	1	Cluster 1
regulation of double-strand break repair via nonhomologous end joining (GO:2001032)	28	2	0.66	+	3.05	0.15	1	Cluster 1
regulation of exit from mitosis (GO:0007096)	14	1	0.33	+	3.05	0.294	1	Cluster 1
methionine metabolic process (GO:0006555)	14	1	0.33	+	3.05	0.294	1	Cluster 1
regulation of high voltage-gated calcium channel activity (GO:1901841)	14	1	0.33	+	3.05	0.294	1	Cluster 1
negative regulation of monooxygenase activity (GO:0032769)	14	1	0.33	+	3.05	0.294	1	Cluster 1
negative regulation of receptor internalization (GO:0002091)	14	1	0.33	+	3.05	0.294	1	Cluster 1
protein K11-linked ubiquitination (GO:0070979)	28	2	0.66	+	3.05	0.15	1	Cluster 1
positive regulation of hepatocyte proliferation (GO:2000347)	14	1	0.33	+	3.05	0.294	1	Cluster 1
nucleosome disassembly (GO:0006337)	14	1	0.33	+	3.05	0.294	1	Cluster 1
cellular component maintenance (GO:0043954)	56	4	1.31	+	3.05	0.0486	0.578	Cluster 1
regulation of histone H4 acetylation (GO:0090239)	14	1	0.33	+	3.05	0.294	1	Cluster 1
regulation of stem cell division (GO:2000035)	14	1	0.33	+	3.05	0.294	1	Cluster 1
regulation of male gonad development (GO:2000018)	14	1	0.33	+	3.05	0.294	1	Cluster 1
regulation of ventricular cardiac muscle cell action potential (GO:0098911)	14	1	0.33	+	3.05	0.294	1	Cluster 1
cellular oxidant detoxification (GO:0098869)	14	1	0.33	+	3.05	0.294	1	Cluster 1
Peyer's patch development (GO:0048541)	14	1	0.33	+	3.05	0.294	1	Cluster 1
mucosal-associated lymphoid tissue development (GO:0048537)	14	1	0.33	+	3.05	0.294	1	Cluster 1
protein heterotetramerization (GO:0051290)	14	1	0.33	+	3.05	0.294	1	Cluster 1
synaptic vesicle fusion to presynaptic active zone membrane (GO:0031629)	14	1	0.33	+	3.05	0.294	1	Cluster 1
hemoglobin metabolic process (GO:0020027)	14	1	0.33	+	3.05	0.294	1	Cluster 1
regulation of autophagy of mitochondrion in response to mitochondrial depolarization (GO:1904923)	14	1	0.33	+	3.05	0.294	1	Cluster 1
chromatin disassembly (GO:0031498)	14	1	0.33	+	3.05	0.294	1	Cluster 1
protein localization to chromosome, telomeric region (GO:0070198)	14	1	0.33	+	3.05	0.294	1	Cluster 1
response to increased oxygen levels (GO:0036296)	14	1	0.33	+	3.05	0.294	1	Cluster 1
lipoprotein transport (GO:0042953)	14	1	0.33	+	3.05	0.294	1	Cluster 1
regulation of glutamate receptor signaling pathway (GO:1900449)	56	4	1.31	+	3.05	0.0486	0.578	Cluster 1
nuclear-transcribed mRNA poly(A) tail shortening (GO:0000289)	14	1	0.33	+	3.05	0.294	1	Cluster 1
lymphocyte costimulation (GO:0031294)	28	2	0.66	+	3.05	0.15	1	Cluster 1
oligosaccharide biosynthetic process (GO:0009312)	14	1	0.33	+	3.05	0.294	1	Cluster 1
regulation of NLRP3 inflammasome complex assembly (GO:1900225)	14	1	0.33	+	3.05	0.294	1	Cluster 1
positive regulation of chromatin binding (GO:0035563)	14	1	0.33	+	3.05	0.294	1	Cluster 1
intracellular estrogen receptor signaling pathway (GO:0030520)	14	1	0.33	+	3.05	0.294	1	Cluster 1
regulation of peroxisome proliferator activated receptor signaling pathway (GO:0035358)	14	1	0.33	+	3.05	0.294	1	Cluster 1
anterior/posterior axis specification, embryo (GO:0008595)	14	1	0.33	+	3.05	0.294	1	Cluster 1
positive regulation of T cell chemotaxis (GO:0010820)	14	1	0.33	+	3.05	0.294	1	Cluster 1
regulation of protein kinase A signaling (GO:0010738)	28	2	0.66	+	3.05	0.15	1	Cluster 1
embryonic hemopoiesis (GO:0035162)	28	2	0.66	+	3.05	0.15	1	Cluster 1
negative regulation of platelet-derived growth factor receptor signaling pathway (GO:0010642)	14	1	0.33	+	3.05	0.294	1	Cluster 1
renal filtration cell differentiation (GO:0061318)	14	1	0.33	+	3.05	0.294	1	Cluster 1
hepatocyte apoptotic process (GO:0097284)	14	1	0.33	+	3.05	0.294	1	Cluster 1
keratinocyte development (GO:0003334)	14	1	0.33	+	3.05	0.294	1	Cluster 1
response to hydroxyurea (GO:0072710)	14	1	0.33	+	3.05	0.294	1	Cluster 1
prostate gland growth (GO:0060736)	14	1	0.33	+	3.05	0.294	1	Cluster 1
negative regulation of autophagosome assembly (GO:1902902)	14	1	0.33	+	3.05	0.294	1	Cluster 1
regulation of RNA polymerase II transcription preinitiation complex assembly (GO:0045898)	14	1	0.33	+	3.05	0.294	1	Cluster 1
supramolecular fiber organization (GO:0097435)	492	35	11.53	+	3.03	2.16e-08	2.38e-06	Cluster 1
regulation of nervous system process (GO:0031644)	183	13	4.29	+	3.03	0.000618	0.0248	Cluster 1
regulation of anatomical structure morphogenesis (GO:0022603)	1101	78	25.81	+	3.02	2.32e-17	6.21e-15	Cluster 1
regulation of transmembrane transporter activity (GO:0022898)	269	19	6.31	+	3.01	4.06e-05	0.00233	Cluster 1
developmental growth (GO:0048589)	439	31	10.29	+	3.01	1.63e-07	1.53e-05	Cluster 1
heart contraction (GO:0060047)	85	6	1.99	+	3.01	0.0182	0.329	Cluster 1
chemotaxis (GO:0006935)	484	34	11.35	+	3	4.58e-08	4.85e-06	Cluster 1
stem cell proliferation (GO:0072089)	57	4	1.34	+	2.99	0.0511	0.594	Cluster 1
regulation of extracellular matrix organization (GO:1903053)	43	3	1.01	+	2.98	0.0881	0.815	Cluster 1
behavioral fear response (GO:0001662)	43	3	1.01	+	2.98	0.0881	0.814	Cluster 1
mesenchymal cell development (GO:0014031)	86	6	2.02	+	2.98	0.0191	0.342	Cluster 1
establishment or maintenance of epithelial cell apical/basal polarity (GO:0045197)	43	3	1.01	+	2.98	0.0881	0.814	Cluster 1
peptidyl-threonine modification (GO:0018210)	86	6	2.02	+	2.98	0.0191	0.341	Cluster 1
positive regulation of potassium ion transmembrane transport (GO:1901381)	43	3	1.01	+	2.98	0.0881	0.813	Cluster 1
regulation of cell junction assembly (GO:1901888)	215	15	5.04	+	2.98	0.000291	0.0126	Cluster 1
taxis (GO:0042330)	489	34	11.46	+	2.97	5.77e-08	5.96e-06	Cluster 1
learning (GO:0007612)	173	12	4.06	+	2.96	0.0012	0.0423	Cluster 1
negative regulation of cellular component organization (GO:0051129)	737	51	17.28	+	2.95	2.8e-11	4.43e-09	Cluster 1
regulation of receptor recycling (GO:0001919)	29	2	0.68	+	2.94	0.158	1	Cluster 1
sprouting angiogenesis (GO:0002040)	58	4	1.36	+	2.94	0.0537	0.617	Cluster 1
response to ATP (GO:0033198)	29	2	0.68	+	2.94	0.158	1	Cluster 1
stem cell development (GO:0048864)	87	6	2.04	+	2.94	0.0201	0.355	Cluster 1
positive regulation of protein polymerization (GO:0032273)	116	8	2.72	+	2.94	0.00782	0.18	Cluster 1
aorta development (GO:0035904)	58	4	1.36	+	2.94	0.0537	0.617	Cluster 1
regulation of receptor-mediated endocytosis (GO:0048259)	116	8	2.72	+	2.94	0.00782	0.18	Cluster 1
histone methylation (GO:0016571)	87	6	2.04	+	2.94	0.0201	0.355	Cluster 1
regulation of ruffle assembly (GO:1900027)	29	2	0.68	+	2.94	0.158	1	Cluster 1
positive regulation of peptidyl-threonine phosphorylation (GO:0010800)	29	2	0.68	+	2.94	0.158	1	Cluster 1
multicellular organism growth (GO:0035264)	116	8	2.72	+	2.94	0.00782	0.18	Cluster 1
negative regulation of heart contraction (GO:0045822)	29	2	0.68	+	2.94	0.158	1	Cluster 1
outflow tract septum morphogenesis (GO:0003148)	29	2	0.68	+	2.94	0.158	1	Cluster 1
negative regulation of growth (GO:0045926)	262	18	6.14	+	2.93	8.96e-05	0.00459	Cluster 1
endoplasmic reticulum organization (GO:0007029)	73	5	1.71	+	2.92	0.0334	0.505	Cluster 1
positive regulation of striated muscle cell differentiation (GO:0051155)	73	5	1.71	+	2.92	0.0334	0.505	Cluster 1
response to mechanical stimulus (GO:0009612)	146	10	3.42	+	2.92	0.00326	0.0938	Cluster 1
positive regulation of anion transport (GO:1903793)	73	5	1.71	+	2.92	0.0334	0.504	Cluster 1
regulation of neural precursor cell proliferation (GO:2000177)	117	8	2.74	+	2.92	0.00819	0.187	Cluster 1
regulation of canonical Wnt signaling pathway (GO:0060828)	234	16	5.49	+	2.92	0.000229	0.0102	Cluster 1
regulation of cation channel activity (GO:2001257)	176	12	4.13	+	2.91	0.00138	0.0472	Cluster 1
neural crest cell differentiation (GO:0014033)	88	6	2.06	+	2.91	0.021	0.362	Cluster 1
positive regulation of mRNA processing (GO:0050685)	44	3	1.03	+	2.91	0.0926	0.8	Cluster 1
regulation of Notch signaling pathway (GO:0008593)	88	6	2.06	+	2.91	0.021	0.361	Cluster 1
regulation of transporter activity (GO:0032409)	279	19	6.54	+	2.9	6.43e-05	0.00348	Cluster 1
protein polyubiquitination (GO:0000209)	221	15	5.18	+	2.9	0.000382	0.0161	Cluster 1
negative regulation of organelle organization (GO:0010639)	398	27	9.33	+	2.89	2.1e-06	0.00016	Cluster 1
neuron death (GO:0070997)	59	4	1.38	+	2.89	0.0563	0.638	Cluster 1
muscle fiber development (GO:0048747)	59	4	1.38	+	2.89	0.0563	0.637	Cluster 1
glycolipid biosynthetic process (GO:0009247)	59	4	1.38	+	2.89	0.0563	0.637	Cluster 1
negative regulation of locomotion (GO:0040013)	325	22	7.62	+	2.89	1.89e-05	0.00119	Cluster 1
response to alkaloid (GO:0043279)	74	5	1.73	+	2.88	0.035	0.507	Cluster 1
sphingolipid biosynthetic process (GO:0030148)	74	5	1.73	+	2.88	0.035	0.507	Cluster 1
sodium ion transmembrane transport (GO:0035725)	89	6	2.09	+	2.88	0.022	0.377	Cluster 1
actin filament-based movement (GO:0030048)	89	6	2.09	+	2.88	0.022	0.377	Cluster 1
sensory perception of mechanical stimulus (GO:0050954)	193	13	4.52	+	2.87	0.00098	0.0362	Cluster 1
regulation of actin filament length (GO:0030832)	193	13	4.52	+	2.87	0.00098	0.0361	Cluster 1
positive regulation of exocytosis (GO:0045921)	104	7	2.44	+	2.87	0.014	0.276	Cluster 1
positive regulation of cellular component organization (GO:0051130)	1239	83	29.05	+	2.86	4.23e-17	1.11e-14	Cluster 1
positive regulation of action potential (GO:0045760)	15	1	0.35	+	2.84	0.31	1	Cluster 1
positive regulation of osteoblast proliferation (GO:0033690)	15	1	0.35	+	2.84	0.31	1	Cluster 1
positive regulation of keratinocyte differentiation (GO:0045618)	15	1	0.35	+	2.84	0.31	1	Cluster 1
segment specification (GO:0007379)	15	1	0.35	+	2.84	0.31	1	Cluster 1
cranial nerve morphogenesis (GO:0021602)	30	2	0.7	+	2.84	0.166	1	Cluster 1
regulation of heart morphogenesis (GO:2000826)	45	3	1.06	+	2.84	0.0972	0.825	Cluster 1
cell differentiation in hindbrain (GO:0021533)	30	2	0.7	+	2.84	0.166	1	Cluster 1
lymphangiogenesis (GO:0001946)	15	1	0.35	+	2.84	0.31	1	Cluster 1
inositol phosphate biosynthetic process (GO:0032958)	15	1	0.35	+	2.84	0.31	1	Cluster 1
behavioral defense response (GO:0002209)	45	3	1.06	+	2.84	0.0972	0.824	Cluster 1
lipoprotein localization (GO:0044872)	15	1	0.35	+	2.84	0.31	1	Cluster 1
convergent extension (GO:0060026)	15	1	0.35	+	2.84	0.31	1	Cluster 1
catecholamine transport (GO:0051937)	15	1	0.35	+	2.84	0.31	1	Cluster 1
regulation of transcription of nucleolar large rRNA by RNA polymerase I (GO:1901836)	15	1	0.35	+	2.84	0.31	1	Cluster 1
translational elongation (GO:0006414)	30	2	0.7	+	2.84	0.166	1	Cluster 1
V(D)J recombination (GO:0033151)	15	1	0.35	+	2.84	0.31	1	Cluster 1
3'-UTR-mediated mRNA stabilization (GO:0070935)	15	1	0.35	+	2.84	0.31	1	Cluster 1
regulation of intrinsic apoptotic signaling pathway in response to DNA damage by p53 class mediator (GO:1902165)	15	1	0.35	+	2.84	0.31	1	Cluster 1
[truncated: 76,966 more rows]
