# Supplementary material for: Single-cell analysis of the ventricular-subventricular zone reveals signatures of dorsal and ventral adult neurogenesis
Source: eLife. 2021 Jul 14;10:e67436. doi: 10.7554/eLife.67436 (PMC8443251; doi:10.7554/eLife.67436)
Supplement: Supplementary file 5. [file elife-67436-supp5.xlsx]

## Sheet: HighScore A cell DE genes
gene	p_val	avg_logFC	dorsal.pct	ventral.pct	p_val_adj
Pbx3	7.8e-116	-2.41944	0.229	0.967	2e-111
Pax6	9e-116	2.01337	0.966	0.135	2.3e-111
Plxna4	7.42e-92	-1.54298	0.318	0.974	1.91e-87
Adarb2	3.17e-90	-1.69734	0.762	0.997	8.18e-86
Shtn1	4.11e-88	-1.32041	0.431	0.964	1.06e-83
Dcc	3.1e-87	2.07112	0.919	0.342	7.99e-83
Sox2ot	1.33e-84	-1.04015	0.996	1	3.42e-80
Ptprn2	2.48e-82	-1.08002	0.374	0.905	6.39e-78
Gm17750	4.68e-81	1.2527	0.985	0.714	1.21e-76
Igfbpl1	1.27e-78	0.716348	1	0.987	3.27e-74
Tenm4	1.41e-78	-1.3631	0.348	0.891	3.65e-74
Foxp2	3.83e-77	-1.81252	0.31	0.868	9.88e-73
Erbb4	1.42e-76	-1.66765	0.575	0.967	3.68e-72
Gm5607	2.12e-75	-1.09713	0.223	0.832	5.48e-71
Pbx1	1.11e-73	-0.77587	0.998	1	2.86e-69
E130114P18Rik	5.41e-73	1.22982	0.773	0.109	1.39e-68
Synpr	1.81e-68	1.39747	0.93	0.414	4.67e-64
Flrt2	9.18e-67	-1.26491	0.314	0.862	2.37e-62
Pcdh9	8.31e-66	-0.9163	0.989	1	2.14e-61
Gm29260	2.01e-63	1.39156	0.669	0.053	5.19e-59
Anks1b	3.3e-61	-0.86564	0.926	0.997	8.52e-57
Luzp2	4.49e-60	-1.42641	0.172	0.717	1.16e-55
Adgrl3	1.25e-57	-1.10668	0.183	0.691	3.23e-53
C79798	5.02e-57	-0.71947	0.036	0.53	1.3e-52
Sp8	1.34e-56	0.808796	0.962	0.579	3.47e-52
Runx1t1	4.58e-56	-1.0202	0.265	0.776	1.18e-51
Zfp704	3.23e-52	-0.75912	0.898	1	8.32e-48
Grik3	4.72e-52	-0.7777	0.221	0.74	1.22e-47
Dpp10	2.59e-51	-1.16491	0.081	0.562	6.68e-47
Tenm2	7.4e-51	-1.0564	0.65	0.928	1.91e-46
Tcf4	3.88e-50	0.485009	1	1	1e-45
Magi2	3.91e-50	-0.70235	0.964	1	1.01e-45
Cacna1c	3.58e-49	-0.84394	0.711	0.98	9.24e-45
Nxph1	5e-47	-1.30612	0.134	0.609	1.29e-42
Rlbp1	7.83e-47	0.702349	0.565	0.056	2.02e-42
Eml5	5.39e-46	1.37482	0.732	0.289	1.39e-41
Frmd4b	8.74e-46	-0.83227	0.605	0.914	2.26e-41
Ctnnd2	7.68e-44	-0.69756	0.851	0.993	1.98e-39
Nlk	9.01e-44	0.711965	0.964	0.839	2.33e-39
Rbms1	1.12e-43	-0.88023	0.066	0.474	2.9e-39
Parm1	3.39e-43	0.966761	0.775	0.273	8.74e-39
Cttnbp2	3.69e-42	0.814395	0.909	0.615	9.52e-38
Plxna2	3.97e-41	-0.67685	0.539	0.898	1.02e-36
Xkr4	7.6e-41	-0.8867	0.423	0.822	1.96e-36
Slit2	1.58e-40	-1.09807	0.113	0.513	4.09e-36
Hmgn2	4.42e-40	0.563506	0.998	0.977	1.14e-35
Tshz2	1.55e-39	-0.88132	0.142	0.566	4e-35
Fam65b	3.02e-39	1.12603	0.618	0.164	7.78e-35
St6galnac5	6.9e-39	-0.93957	0.146	0.559	1.78e-34
Gm26871	8.02e-39	-1.0447	0.127	0.546	2.07e-34
Actg1	1.37e-38	0.417102	0.998	0.99	3.54e-34
Vax1	2.11e-38	-0.35867	0.004	0.326	5.44e-34
Mapk10	3.8e-38	-0.76614	0.558	0.882	9.81e-34
Gm38505	4.54e-38	-0.6483	0.679	0.938	1.17e-33
Pfn2	3.26e-37	0.411142	1	0.984	8.41e-33
Nfia	7.38e-37	0.509536	0.998	0.977	1.91e-32
Chd3	8.48e-37	0.695131	0.902	0.625	2.19e-32
Insm1	1.67e-36	0.686377	0.582	0.138	4.31e-32
Dach1	2.61e-36	1.48956	0.49	0.062	6.74e-32
Myt1l	3.18e-36	-0.63255	0.741	0.961	8.19e-32
Zswim6	1.63e-35	-0.63105	0.892	0.98	4.2e-31
Sox6	2.04e-35	0.970063	0.87	0.566	5.27e-31
Prkca	4.72e-35	-0.8375	0.236	0.615	1.22e-30
Lrrc7	1.73e-34	-0.62845	0.881	0.997	4.47e-30
Mtss1	3.57e-34	-0.61375	0.584	0.859	9.21e-30
Dab1	4.04e-34	0.650192	0.618	0.168	1.04e-29
Stmn2	4.82e-34	0.430958	1	1	1.24e-29
Nbea	4.99e-34	-0.77977	0.809	0.924	1.29e-29
Slc15a2	7.83e-34	0.606421	0.972	0.829	2.02e-29
St18	9.05e-34	0.870146	0.724	0.322	2.33e-29
Sel1l3	2.92e-33	0.823627	0.628	0.234	7.54e-29
Arx	1.77e-32	0.510032	0.994	0.878	4.56e-28
B020031H02Rik	5.11e-32	-0.64411	0.123	0.487	1.32e-27
Fam155a	6.48e-32	-0.76809	0.586	0.882	1.67e-27
Slc4a4	1.13e-31	-0.76294	0.219	0.599	2.92e-27
Slc1a3	1.87e-31	0.929239	0.556	0.158	4.83e-27
H3f3a	2.1e-31	0.383427	1	0.997	5.42e-27
Nrep	2.85e-31	-0.47774	0.854	0.947	7.35e-27
Pde4dip	3.22e-31	-0.55339	0.815	0.951	8.3e-27
Nfix	6.4e-31	0.402493	1	0.993	1.65e-26
B3gat1	1.87e-30	-0.46908	0.051	0.368	4.83e-26
Erc2	3.37e-30	-0.71455	0.255	0.622	8.7e-26
Tshz1	3.44e-30	-0.68472	0.499	0.803	8.88e-26
Wnt5a	4.53e-30	-0.40168	0.066	0.395	1.17e-25
Hsp90ab1	4.82e-30	0.362166	1	0.99	1.24e-25
Bmper	5.47e-30	-0.49094	0.034	0.332	1.41e-25
Tle1	1.12e-29	0.572356	0.788	0.428	2.89e-25
Kcnn2	2.43e-29	-0.68784	0.561	0.819	6.27e-25
Ptprm	6.04e-29	-0.80781	0.117	0.441	1.56e-24
Sem1	1.03e-28	0.547986	0.975	0.895	2.66e-24
Adcy2	2.38e-28	-0.49257	0.093	0.431	6.14e-24
Dclk2	2.76e-28	0.514576	0.949	0.826	7.13e-24
Cers6	1.24e-27	-0.55525	0.187	0.543	3.19e-23
Asap1	1.79e-27	-0.47842	0.877	0.951	4.61e-23
Peli2	1.89e-27	-0.51736	0.304	0.681	4.88e-23
Tmsb4x	8.15e-27	0.653275	1	0.993	2.1e-22
Ntng1	9.12e-27	-0.67973	0.021	0.276	2.35e-22
Actb	1.55e-26	0.405029	1	1	4e-22
Tubb5	3.57e-26	0.319352	1	0.997	9.22e-22
Rims1	3.84e-26	-0.75853	0.316	0.645	9.9e-22
Nr2f1	6.52e-26	0.583556	0.648	0.273	1.68e-21
Itm2b	1.72e-25	0.430687	0.907	0.724	4.44e-21
Gm45680	3.9e-25	-0.44712	0.11	0.421	1.01e-20
Etv1	5.92e-25	-0.68071	0.465	0.753	1.53e-20
Gnas	1.17e-24	0.339397	0.996	0.997	3.02e-20
Adgrb3	2.07e-24	0.527251	0.868	0.516	5.33e-20
Meg3	2.07e-24	-0.56905	0.718	0.931	5.35e-20
Sorbs2	3.17e-24	-0.5383	0.749	0.938	8.17e-20
Cdk14	3.21e-24	-0.53769	0.86	0.951	8.29e-20
Gm5087	6.38e-24	0.537972	0.439	0.105	1.65e-19
Thra	7.3e-24	-0.49308	0.605	0.822	1.88e-19
Dmrta2	1.05e-23	0.400056	0.285	0.003	2.71e-19
Nrcam	3.94e-23	-0.55028	0.272	0.582	1.02e-18
Dusp4	4.51e-23	-0.27855	0.03	0.27	1.16e-18
Nlgn1	7.13e-23	0.827791	0.826	0.546	1.84e-18
Fam210b	8.46e-23	0.353849	0.42	0.092	2.18e-18
Sntg1	1.48e-22	-0.57724	0.531	0.809	3.81e-18
Chn1	1.68e-22	0.500141	0.618	0.283	4.34e-18
Ddx5	1.96e-22	0.289244	1	0.997	5.05e-18
Elmo1	2.14e-22	-0.49031	0.486	0.763	5.53e-18
Cst3	3.34e-22	0.357847	0.996	0.977	8.63e-18
Nrxn1	4.26e-22	0.500274	0.981	0.891	1.1e-17
Sox4	4.75e-22	-0.29968	1	1	1.22e-17
Tuba1a	9.45e-22	0.320333	1	1	2.44e-17
Ptprt	1.03e-21	-0.65872	0.068	0.326	2.65e-17
Mpped2	1.23e-21	-0.63975	0.907	0.951	3.16e-17
Cfl1	1.3e-21	0.311581	0.998	0.993	3.35e-17
Ubc	1.35e-21	0.349604	0.998	0.987	3.49e-17
Enox1	8.66e-21	-0.41742	0.975	0.997	2.24e-16
Mtch1	1.22e-20	0.368797	0.949	0.836	3.14e-16
Edil3	2.16e-20	0.521238	0.917	0.74	5.57e-16
Mn1	3.88e-20	-0.40314	0.225	0.53	1e-15
Zfhx4	4.07e-20	-0.66312	0.255	0.553	1.05e-15
Ubash3b	4.8e-20	-0.4232	0.11	0.382	1.24e-15
Slco5a1	5.08e-20	-0.38871	0.202	0.503	1.31e-15
Glrx2	5.21e-20	0.425586	0.809	0.539	1.34e-15
Vim	5.99e-20	0.693526	0.741	0.553	1.55e-15
Sntb1	6.68e-20	-0.69575	0.042	0.26	1.72e-15
Zfhx3	1.05e-19	-0.45066	0.113	0.375	2.72e-15
Cacng2	1.14e-19	-0.25345	0.03	0.24	2.94e-15
Sptbn1	2.04e-19	-0.43452	0.442	0.727	5.25e-15
Fgf13	2.67e-19	-0.58047	0.603	0.822	6.9e-15
Kat2b	3.7e-19	-0.32901	0.074	0.319	9.55e-15
Cd9	6.67e-19	0.431921	0.686	0.395	1.72e-14
Tagln3	6.76e-19	0.408622	0.911	0.688	1.74e-14
Slit1	7.08e-19	-0.43181	0.236	0.539	1.83e-14
Irf2bpl	7.99e-19	0.436328	0.692	0.424	2.06e-14
Mid1ip1	1.1e-18	0.455602	0.408	0.118	2.84e-14
Slc6a1	1.15e-18	-0.41078	0.325	0.609	2.97e-14
Ccdc88a	1.56e-18	0.274091	1	0.997	4.04e-14
Nav3	2.86e-18	-0.30079	0.996	1	7.37e-14
Gadd45g	3.67e-18	0.795116	0.48	0.201	9.48e-14
Fbxl7	1.22e-17	-0.60701	0.157	0.424	3.14e-13
D430041D05Rik	1.95e-17	-0.49377	0.297	0.582	5.03e-13
Pde4b	2.52e-17	-0.52453	0.089	0.316	6.51e-13
Mbd3	2.6e-17	0.379006	0.792	0.52	6.71e-13
2021-03-03	3.94e-17	-0.52937	0.416	0.668	1.02e-12
Lamp1	4.7e-17	0.365428	0.752	0.461	1.21e-12
C130071C03Rik	4.73e-17	0.330815	0.989	0.967	1.22e-12
Kalrn	5.26e-17	-0.3937	0.851	0.934	1.36e-12
Ube2e2	7.39e-17	0.421581	0.696	0.359	1.91e-12
Ctnna2	7.44e-17	-0.3412	1	1	1.92e-12
Sumo2	1.01e-16	0.299749	0.994	0.977	2.6e-12
Syn3	1.06e-16	-0.54873	0.185	0.447	2.73e-12
Gabrb3	1.27e-16	-0.44793	0.707	0.859	3.28e-12
Tmem123	2.19e-16	-0.33692	0.172	0.431	5.65e-12
Mdga2	2.54e-16	0.555179	0.48	0.191	6.55e-12
Cntnap4	3.59e-16	-0.49667	0.113	0.345	9.27e-12
Zfpm2	3.92e-16	0.617519	0.471	0.201	1.01e-11
Gad2	5.08e-16	0.333187	0.983	0.947	1.31e-11
Sorcs3	5.19e-16	-0.5015	0.127	0.362	1.34e-11
Hif1a	5.2e-16	0.362688	0.631	0.359	1.34e-11
Cdk2ap1	7.18e-16	0.347404	0.754	0.464	1.85e-11
Hcn1	7.46e-16	-0.42451	0.04	0.23	1.92e-11
Dchs2	8.59e-16	-0.30111	0.021	0.188	2.22e-11
Phlpp1	8.75e-16	0.374213	0.594	0.299	2.26e-11
Tcaf1	8.9e-16	-0.34875	0.89	0.924	2.3e-11
Fgfr2	1.5e-15	-0.41316	0.622	0.77	3.86e-11
Ccser1	2.23e-15	-0.79435	0.514	0.704	5.76e-11
Ntm	2.6e-15	-0.51486	0.102	0.312	6.72e-11
C530008M17Rik	3.32e-15	-0.38739	0.76	0.891	8.56e-11
Dlx5	3.9e-15	0.382103	0.805	0.589	1.01e-10
Igsf11	4.23e-15	0.362833	0.669	0.375	1.09e-10
Slc35f1	4.36e-15	-0.59328	0.431	0.641	1.13e-10
Gm13889	7.27e-15	0.419821	0.722	0.477	1.88e-10
Slc8a1	8.34e-15	-0.49717	0.76	0.882	2.15e-10
Trhde	8.52e-15	0.687851	0.259	0.046	2.2e-10
Pdcd4	9.07e-15	-0.39502	0.571	0.776	2.34e-10
Ncam2	1.07e-14	-0.66761	0.299	0.566	2.75e-10
Unc5d	1.73e-14	-0.69381	0.195	0.434	4.45e-10
Efna5	2.01e-14	0.58519	0.429	0.164	5.18e-10
Lmo3	2.02e-14	0.433827	0.76	0.549	5.2e-10
Cdk4	2.05e-14	0.303165	0.943	0.885	5.3e-10
Pantr1	2.58e-14	0.352492	0.958	0.898	6.67e-10
Wls	2.64e-14	-0.48039	0.488	0.697	6.81e-10
Tmem2	3.52e-14	-0.452	0.346	0.586	9.09e-10
Ddah2	3.75e-14	0.328282	0.907	0.74	9.68e-10
Epb41l4a	4.06e-14	0.294776	0.257	0.046	1.05e-09
Dynll1	4.72e-14	0.276139	0.994	0.97	1.22e-09
Gnai1	4.82e-14	-0.32485	0.172	0.405	1.24e-09
Selenok	5.69e-14	0.256297	0.989	0.957	1.47e-09
Crmp1	6.19e-14	0.30828	0.921	0.786	1.6e-09
Igfbp5	7.87e-14	0.667562	0.48	0.243	2.03e-09
Bcl11a	8.66e-14	0.293268	0.981	0.944	2.23e-09
Parp8	1.01e-13	0.308561	0.236	0.036	2.61e-09
Id4	1.61e-13	0.348071	0.52	0.243	4.16e-09
Nxpe3	1.82e-13	0.273875	0.346	0.112	4.69e-09
Slc25a5	1.88e-13	0.372344	0.735	0.51	4.85e-09
Maml3	2.44e-13	-0.3821	0.919	0.938	6.29e-09
Lrrtm3	2.56e-13	-0.43971	0.068	0.25	6.59e-09
Pip5k1b	2.83e-13	-0.4293	0.367	0.586	7.31e-09
Fdft1	2.95e-13	0.347938	0.605	0.352	7.61e-09
Npc2	3.03e-13	0.304994	0.832	0.602	7.82e-09
Plcb4	3.78e-13	-0.44123	0.442	0.641	9.76e-09
Il1rapl1	3.8e-13	-0.5232	0.737	0.845	9.81e-09
Crtac1	3.84e-13	-0.29444	0.119	0.329	9.9e-09
Taldo1	4.11e-13	0.33238	0.703	0.451	1.06e-08
Rraga	4.49e-13	0.300176	0.699	0.464	1.16e-08
Tmem178b	5.55e-13	-0.41156	0.66	0.816	1.43e-08
Klf7	5.66e-13	0.290966	0.981	0.938	1.46e-08
Ndn	6.15e-13	0.319209	0.764	0.549	1.59e-08
Ttc9b	6.22e-13	0.346894	0.752	0.523	1.61e-08
Snhg14	6.78e-13	-0.3709	0.442	0.671	1.75e-08
1810026B05Rik	6.89e-13	0.404627	0.898	0.717	1.78e-08
Dgkb	6.98e-13	-0.46308	0.586	0.757	1.8e-08
H2afv	8.38e-13	0.280905	0.972	0.944	2.16e-08
Uchl1	8.88e-13	0.287535	0.966	0.852	2.29e-08
Akirin1	1.07e-12	0.304107	0.567	0.306	2.75e-08
Ubald2	1.07e-12	0.315402	0.783	0.53	2.77e-08
Sema3c	1.14e-12	0.357306	0.202	0.026	2.93e-08
Nkain3	1.2e-12	-0.4218	0.138	0.345	3.08e-08
Gm45025	1.5e-12	0.258418	0.238	0.046	3.88e-08
Chd7	1.6e-12	0.305968	0.851	0.688	4.13e-08
Psmd8	1.81e-12	0.273767	0.707	0.451	4.66e-08
Magi1	2.51e-12	-0.32557	0.739	0.868	6.49e-08
Mfap2	2.71e-12	0.352033	0.665	0.454	6.99e-08
Cox5a	2.87e-12	0.282962	0.849	0.661	7.4e-08
Rhob	2.92e-12	0.328662	0.798	0.609	7.54e-08
Kcnh8	3.32e-12	-0.39383	0.369	0.595	8.56e-08
Ubald1	3.48e-12	0.251493	0.442	0.188	8.97e-08
Kif5b	3.49e-12	0.297658	0.849	0.638	9e-08
Tox3	7.39e-12	0.306963	0.975	0.934	1.91e-07
Commd2	7.43e-12	0.274262	0.72	0.48	1.92e-07
Khdrbs3	7.65e-12	-0.28718	0.936	0.984	1.98e-07
Ldhb	9.39e-12	0.318032	0.921	0.806	2.42e-07
Mvb12b	9.52e-12	-0.35243	0.645	0.757	2.46e-07
Manf	1.02e-11	0.328434	0.745	0.53	2.64e-07
Apex1	1.5e-11	0.277611	0.764	0.543	3.87e-07
Snrpn	1.98e-11	-0.37883	0.531	0.724	5.11e-07
Dscam	2.13e-11	0.376848	0.446	0.214	5.49e-07
Mdk	2.24e-11	0.527695	0.573	0.368	5.78e-07
Tbcb	2.3e-11	0.280439	0.66	0.431	5.94e-07
Sorcs1	2.31e-11	0.539028	0.335	0.125	5.96e-07
Bach2	2.44e-11	-0.36304	0.732	0.875	6.29e-07
Atf4	2.69e-11	0.327459	0.775	0.543	6.93e-07
Gm20754	2.75e-11	-0.3974	0.072	0.237	7.11e-07
Dpp6	2.86e-11	0.340039	0.501	0.25	7.39e-07
Bax	2.97e-11	0.26038	0.728	0.484	7.67e-07
Rpl36al	3e-11	0.274735	0.883	0.691	7.74e-07
Hecw1	3.44e-11	-0.32511	0.442	0.664	8.87e-07
Tanc2	3.65e-11	-0.38731	0.684	0.806	9.41e-07
Ppp1r12b	3.81e-11	-0.31523	0.709	0.852	9.83e-07
Cycs	4.24e-11	0.268908	0.565	0.312	1.09e-06
Cited2	5.31e-11	0.37295	0.941	0.819	1.37e-06
Carhsp1	5.38e-11	0.290509	0.807	0.609	1.39e-06
Sez6	5.57e-11	-0.2883	0.327	0.553	1.44e-06
Msmo1	7.01e-11	0.277734	0.384	0.161	1.81e-06
Mef2a	7.02e-11	0.308805	0.747	0.533	1.81e-06
Dlx1as	9.28e-11	0.35162	0.769	0.569	2.39e-06
Myl12b	1.04e-10	0.27691	0.837	0.635	2.69e-06
Ldlrad3	1.05e-10	-0.31925	0.217	0.424	2.71e-06
Nab1	1.22e-10	-0.25463	0.293	0.51	3.15e-06
Nrp1	1.26e-10	0.397083	0.206	0.043	3.26e-06
Fam196b	1.44e-10	-0.30832	0.144	0.329	3.71e-06
1110038B12Rik	1.46e-10	0.318638	0.737	0.53	3.77e-06
Tubb2a	1.54e-10	-0.25752	0.907	0.957	3.97e-06
Slc25a13	1.58e-10	0.268943	0.24	0.066	4.08e-06
Pigk	1.78e-10	-0.25623	0.138	0.322	4.6e-06
Sdk2	1.88e-10	0.300987	0.904	0.783	4.85e-06
Ola1	2.3e-10	0.312774	0.567	0.365	5.93e-06
Ccdc124	2.51e-10	0.257503	0.554	0.322	6.48e-06
Phlda1	2.68e-10	0.252127	0.157	0.016	6.91e-06
Pid1	2.81e-10	0.39052	0.361	0.158	7.25e-06
Tpgs2	2.86e-10	0.256545	0.456	0.24	7.39e-06
Cdh2	3.18e-10	-0.26437	0.951	0.977	8.2e-06
Gm26735	3.49e-10	-0.3116	0.896	0.901	8.99e-06
Med22	3.9e-10	0.256124	0.762	0.572	1.01e-05
Glrb	3.92e-10	0.288943	0.467	0.25	1.01e-05
Brinp3	3.96e-10	0.43941	0.206	0.046	1.02e-05
Ppp3ca	4.2e-10	-0.31277	0.669	0.803	1.08e-05
Ndrg2	4.78e-10	0.292227	0.73	0.516	1.23e-05
Psma2	4.78e-10	0.255317	0.766	0.562	1.23e-05
S100a10	5.03e-10	-0.36787	0.295	0.487	1.3e-05
Tnik	5.18e-10	0.267334	0.611	0.368	1.34e-05
Tprgl	6.08e-10	0.258791	0.524	0.309	1.57e-05
Fam168a	6.7e-10	-0.31691	0.478	0.651	1.73e-05
Pou3f4	9.22e-10	0.297989	0.843	0.651	2.38e-05
Large1	1.07e-09	-0.31227	0.609	0.737	2.77e-05
Rnf165	1.13e-09	-0.30621	0.397	0.586	2.91e-05
Slc44a5	1.2e-09	-0.47311	0.117	0.28	3.08e-05
Robo1	1.23e-09	-0.40593	0.312	0.526	3.18e-05
H2afy	1.29e-09	0.252348	0.919	0.816	3.34e-05
Arid5b	1.37e-09	0.329529	0.263	0.092	3.52e-05
Nell2	1.43e-09	-0.34096	0.435	0.599	3.7e-05
Itgbl1	1.5e-09	-0.30695	0.072	0.22	3.88e-05
Pclo	1.63e-09	-0.30047	0.127	0.296	4.21e-05
Dach2	1.83e-09	-0.4621	0.134	0.299	4.72e-05
Cox7c	1.83e-09	0.288132	0.932	0.852	4.72e-05
Akirin2	1.9e-09	0.254702	0.862	0.681	4.91e-05
Slc35f4	2.26e-09	-0.2602	0.059	0.197	5.84e-05
Eif4a-ps4	2.28e-09	0.250969	0.546	0.322	5.89e-05
Pten	2.47e-09	0.317168	0.847	0.681	6.37e-05
Aff3	2.76e-09	-0.27368	0.834	0.908	7.12e-05
Lurap1l	2.82e-09	-0.26709	0.197	0.388	7.27e-05
Mcl1	2.85e-09	0.257992	0.682	0.447	7.34e-05
Tenm1	3.41e-09	0.41716	0.27	0.099	8.81e-05
Sox9	4.01e-09	0.256611	0.361	0.164	0.000103
Sema5a	4.03e-09	-0.31287	0.174	0.355	0.000104
Bzw2	4.6e-09	-0.30616	0.588	0.72	0.000119
Sema6d	4.64e-09	0.303973	0.654	0.428	0.00012
Zfp618	5.02e-09	-0.26483	0.323	0.53	0.000129
Arl4d	5.21e-09	0.325252	0.637	0.457	0.000134
Birc2	5.29e-09	-0.27292	0.423	0.589	0.000137
Rian	7.91e-09	-0.31742	0.367	0.569	0.000204
Rnf180	7.97e-09	0.253005	0.448	0.243	0.000206
Crim1	7.97e-09	-0.27715	0.062	0.194	0.000206
Cacng4	8.98e-09	-0.25273	0.412	0.602	0.000232
Srsf2	1.08e-08	0.264964	0.915	0.773	0.000278
Fam214a	1.45e-08	0.268896	0.592	0.398	0.000375
Lrrc4c	1.55e-08	-0.37963	0.127	0.28	0.000399
Phactr1	1.76e-08	-0.26104	0.89	0.944	0.000455
Hmgcs1	2.09e-08	0.278035	0.586	0.378	0.00054
Dner	2.16e-08	0.278847	0.386	0.201	0.000556
Lin7a	2.24e-08	0.257678	0.348	0.161	0.000578
Cntnap2	2.83e-08	-0.49968	0.248	0.408	0.00073
2610203C20Rik	2.87e-08	-0.26708	0.851	0.878	0.00074
Ccnl1	3.08e-08	0.288303	0.548	0.362	0.000795
Trps1	3.38e-08	0.261748	0.618	0.391	0.000872
Srgap2	3.58e-08	-0.27781	0.89	0.911	0.000924
Gria4	3.73e-08	-0.45286	0.486	0.658	0.000962
Zeb1	4.07e-08	-0.29542	0.955	0.941	0.001051
Rbfox1	4.15e-08	0.492123	0.446	0.273	0.00107
Hivep3	4.56e-08	-0.31542	0.272	0.438	0.001178
Csrnp3	4.97e-08	-0.30518	0.236	0.408	0.001283
Meis1	5.05e-08	-0.38574	0.484	0.609	0.001304
Baz2b	5.22e-08	-0.26265	0.843	0.888	0.001348
Pik3r1	7.03e-08	0.297203	0.571	0.385	0.001814
Cachd1	7.17e-08	-0.28747	0.229	0.401	0.001849
Frmd4a	7.69e-08	-0.30817	0.507	0.648	0.001984
Hdgf	7.91e-08	0.250695	0.805	0.645	0.002042
Pam	8.2e-08	-0.34511	0.851	0.872	0.002117
Ptn	9.33e-08	-0.33622	0.187	0.342	0.002407
Clic1	1.33e-07	0.256551	0.403	0.227	0.003443
Ubl5	1.42e-07	0.256845	0.715	0.549	0.00367
Gpr137c	1.57e-07	-0.34103	0.469	0.612	0.004053
B3galt1	1.7e-07	-0.32911	0.686	0.766	0.004384
Asic2	1.7e-07	-0.26866	0.104	0.24	0.004399
Epha3	1.86e-07	-0.36229	0.151	0.293	0.004803
Grid2	1.87e-07	0.342756	0.423	0.243	0.004835
Apba2	2.14e-07	-0.27272	0.556	0.681	0.005515
Pola1	3.53e-07	0.30059	0.546	0.378	0.009113
Asxl3	3.76e-07	-0.27918	0.571	0.701	0.009705
Syt1	4.02e-07	-0.43398	0.287	0.438	0.010383
Rmst	4.26e-07	0.255317	0.246	0.102	0.01099
Oaz1-ps	4.51e-07	0.25227	0.514	0.332	0.011646
Cadm2	4.53e-07	-0.34713	0.875	0.938	0.011679
St6galnac3	4.54e-07	-0.29016	0.686	0.757	0.011724
Klf8	7.08e-07	-0.26969	0.153	0.296	0.018279
Thrb	7.6e-07	-0.25294	0.119	0.25	0.019598
Rora	7.79e-07	-0.29931	0.484	0.628	0.020111
Cntn5	9.16e-07	-0.56223	0.134	0.263	0.023647
Pak7	1.11e-06	-0.25861	0.794	0.855	0.028683
Pknox2	3.12e-06	-0.27736	0.31	0.451	0.080406
L3mbtl3	3.99e-06	-0.26705	0.18	0.309	0.102906
Kctd16	6.41e-06	0.256859	0.146	0.046	0.165365
5730522E02Rik	6.89e-06	-0.34772	0.55	0.648	0.1778
Ppm1l	9.94e-06	-0.28979	0.597	0.704	0.256595
C130073E24Rik	1.18e-05	-0.28894	0.03	0.105	0.305538
Il1rapl2	1.26e-05	0.410338	0.121	0.033	0.326152
Trpc4	1.94e-05	0.53522	0.459	0.352	0.499642
Kcnj3	2.12e-05	-0.37674	0.21	0.329	0.546999
Mllt3	2.68e-05	-0.28229	0.652	0.704	0.692146
Grm8	3.84e-05	-0.30841	0.285	0.405	0.991997
Brinp1	3.92e-05	0.317837	0.437	0.303	1
Zfp804a	9.16e-05	-0.31708	0.119	0.22	1
Gria2	9.83e-05	0.293648	0.843	0.763	1
Thsd7a	0.000174	-0.39497	0.348	0.441	1
Vcan	0.000184	-0.26238	0.752	0.809	1
Ier2	0.000246	0.25747	0.418	0.306	1
Ptprg	0.000345	-0.27385	0.325	0.428	1
Macrod2	0.000436	-0.26479	0.73	0.766	1
Sgcd	0.000583	-0.26038	0.142	0.234	1
Dock4	0.00059	-0.26113	0.709	0.737	1
Wwox	0.002026	-0.253	0.204	0.293	1
Frmd5	0.002732	-0.26153	0.435	0.507	1
Kcnd2	0.002891	-0.30239	0.297	0.378	1
Nrg1	0.004607	0.319446	0.703	0.625	1
Nkain2	0.005247	-0.29135	0.397	0.454	1
Unc5c	0.005776	-0.26129	0.106	0.174	1
Tmod3	0.016492	-0.27357	0.382	0.441	1

## Sheet: HighScore Ventral A cells GO
go	ref	obs	expected	pos.neg	fold.enrich	raw.p.value	fdr
chemorepulsion of branchiomotor axon (GO:0021793)	1	1	0.01	+	> 100	0.0063	0.257
positive regulation of calcium ion-dependent exocytosis of neurotransmitter (GO:1903235)	1	1	0.01	+	> 100	0.0063	0.256
synchronous neurotransmitter secretion (GO:0071911)	1	1	0.01	+	> 100	0.0063	0.256
coronal suture morphogenesis (GO:0060365)	1	1	0.01	+	> 100	0.0063	0.255
negative regulation of axon guidance (GO:1902668)	1	1	0.01	+	> 100	0.0063	0.254
primary adaptive immune response involving T cells and B cells (GO:0090721)	1	1	0.01	+	> 100	0.0063	0.254
primary adaptive immune response (GO:0090720)	1	1	0.01	+	> 100	0.0063	0.253
peptide amidation (GO:0001519)	1	1	0.01	+	> 100	0.0063	0.252
negative regulation of retinal ganglion cell axon guidance (GO:0090260)	1	1	0.01	+	> 100	0.0063	0.252
protein amidation (GO:0018032)	1	1	0.01	+	> 100	0.0063	0.251
radial pattern formation (GO:0009956)	1	1	0.01	+	> 100	0.0063	0.251
induction of negative chemotaxis (GO:0050929)	1	1	0.01	+	> 100	0.0063	0.25
positive regulation of negative chemotaxis (GO:0050924)	1	1	0.01	+	> 100	0.0063	0.249
chemoattraction of serotonergic neuron axon (GO:0036517)	1	1	0.01	+	> 100	0.0063	0.249
fast, calcium ion-dependent exocytosis of neurotransmitter (GO:0098746)	1	1	0.01	+	> 100	0.0063	0.248
oncosis (GO:0070267)	1	1	0.01	+	> 100	0.0063	0.247
negative regulation of cell proliferation in midbrain (GO:1904934)	1	1	0.01	+	> 100	0.0063	0.247
negative regulation of RNA polymerase II transcription preinitiation complex assembly (GO:0017055)	1	1	0.01	+	> 100	0.0063	0.246
regulation of synaptic plasticity by receptor localization to synapse (GO:1900383)	1	1	0.01	+	> 100	0.0063	0.246
fibroblast growth factor receptor signaling pathway involved in positive regulation of cell proliferation in bone marrow (GO:0035604)	1	1	0.01	+	> 100	0.0063	0.245
fibroblast growth factor receptor signaling pathway involved in hemopoiesis (GO:0035603)	1	1	0.01	+	> 100	0.0063	0.244
fibroblast growth factor receptor signaling pathway involved in negative regulation of apoptotic process in bone marrow cell (GO:0035602)	1	1	0.01	+	> 100	0.0063	0.244
circadian sleep/wake cycle, REM sleep (GO:0042747)	1	1	0.01	+	> 100	0.0063	0.243
fatty acid primary amide metabolic process (GO:0062126)	1	1	0.01	+	> 100	0.0063	0.243
fatty acid primary amide biosynthetic process (GO:0062112)	1	1	0.01	+	> 100	0.0063	0.242
actin filament bundle retrograde transport (GO:0061573)	1	1	0.01	+	> 100	0.0063	0.241
epithelial to mesenchymal transition involved in cardiac fibroblast development (GO:0060940)	1	1	0.01	+	> 100	0.0063	0.241
cardiac cell fate specification (GO:0060912)	1	1	0.01	+	> 100	0.0063	0.24
planar cell polarity pathway involved in pericardium morphogenesis (GO:0061354)	1	1	0.01	+	> 100	0.0063	0.24
planar cell polarity pathway involved in cardiac muscle tissue morphogenesis (GO:0061350)	1	1	0.01	+	> 100	0.0063	0.239
planar cell polarity pathway involved in cardiac right atrium morphogenesis (GO:0061349)	1	1	0.01	+	> 100	0.0063	0.239
planar cell polarity pathway involved in ventricular septum morphogenesis (GO:0061348)	1	1	0.01	+	> 100	0.0063	0.238
planar cell polarity pathway involved in outflow tract morphogenesis (GO:0061347)	1	1	0.01	+	> 100	0.0063	0.237
lamellipodium assembly involved in ameboidal cell migration (GO:0003363)	1	1	0.01	+	> 100	0.0063	0.237
endoplasmic reticulum polarization (GO:0061163)	1	1	0.01	+	> 100	0.0063	0.236
corticospinal neuron axon guidance through spinal cord (GO:0021972)	1	1	0.01	+	> 100	0.0063	0.236
chemorepulsion involved in postnatal olfactory bulb interneuron migration (GO:0021836)	2	2	0.01	+	> 100	7.87e-05	0.0102
extension of a leading process involved in cell motility in cerebral cortex radial glia guided migration (GO:0021816)	1	1	0.01	+	> 100	0.0063	0.235
regulation of negative chemotaxis (GO:0050923)	4	3	0.03	+	> 100	2.59e-06	0.000516
postnatal olfactory bulb interneuron migration (GO:0021827)	3	2	0.02	+	> 100	0.000176	0.0188
substrate-dependent cerebral cortex tangential migration (GO:0021825)	3	2	0.02	+	> 100	0.000176	0.0186
cerebral cortex tangential migration using cell-cell interactions (GO:0021823)	3	2	0.02	+	> 100	0.000176	0.0185
postganglionic parasympathetic fiber development (GO:0021784)	2	1	0.01	+	79.09	0.0126	0.392
orbitofrontal cortex development (GO:0021769)	2	1	0.01	+	79.09	0.0126	0.391
positive regulation of cardiac muscle hypertrophy in response to stress (GO:1903244)	2	1	0.01	+	79.09	0.0126	0.39
vagus nerve morphogenesis (GO:0021644)	2	1	0.01	+	79.09	0.0126	0.389
dorsal/ventral axon guidance (GO:0033563)	4	2	0.03	+	79.09	0.000312	0.0286
central nervous system morphogenesis (GO:0021551)	2	1	0.01	+	79.09	0.0126	0.389
positive regulation of dense core granule biogenesis (GO:2000707)	2	1	0.01	+	79.09	0.0126	0.388
nephron tubule epithelial cell differentiation (GO:0072160)	2	1	0.01	+	79.09	0.0126	0.387
virus maturation (GO:0019075)	2	1	0.01	+	79.09	0.0126	0.386
establishment of planar polarity involved in nephron morphogenesis (GO:0072046)	2	1	0.01	+	79.09	0.0126	0.386
cervix development (GO:0060067)	2	1	0.01	+	79.09	0.0126	0.385
mediolateral intercalation (GO:0060031)	2	1	0.01	+	79.09	0.0126	0.384
negative regulation of relaxation of cardiac muscle (GO:1901898)	2	1	0.01	+	79.09	0.0126	0.383
positive regulation of timing of anagen (GO:0051885)	2	1	0.01	+	79.09	0.0126	0.383
actin filament bundle distribution (GO:0070650)	2	1	0.01	+	79.09	0.0126	0.382
negative regulation of negative chemotaxis (GO:0050925)	2	1	0.01	+	79.09	0.0126	0.381
chemorepulsion of dopaminergic neuron axon (GO:0036518)	2	1	0.01	+	79.09	0.0126	0.38
inorganic anion import across plasma membrane (GO:0098658)	2	1	0.01	+	79.09	0.0126	0.38
regulation of cell proliferation in midbrain (GO:1904933)	2	1	0.01	+	79.09	0.0126	0.379
pseudopodium assembly (GO:0031269)	2	1	0.01	+	79.09	0.0126	0.378
fibroblast growth factor receptor signaling pathway involved in orbitofrontal cortex development (GO:0035607)	2	1	0.01	+	79.09	0.0126	0.378
peptide modification (GO:0031179)	2	1	0.01	+	79.09	0.0126	0.377
histone H3-T6 phosphorylation (GO:0035408)	2	1	0.01	+	79.09	0.0126	0.376
positive regulation of synaptic vesicle priming (GO:0010808)	2	1	0.01	+	79.09	0.0126	0.375
epicardium-derived cardiac fibroblast cell development (GO:0060939)	2	1	0.01	+	79.09	0.0126	0.375
epicardium-derived cardiac fibroblast cell differentiation (GO:0060938)	2	1	0.01	+	79.09	0.0126	0.374
cardiac fibroblast cell development (GO:0060936)	2	1	0.01	+	79.09	0.0126	0.373
cardiac fibroblast cell differentiation (GO:0060935)	2	1	0.01	+	79.09	0.0126	0.373
mesenchymal cell differentiation involved in lung development (GO:0060915)	2	1	0.01	+	79.09	0.0126	0.372
positive regulation of cardiac muscle adaptation (GO:0010615)	2	1	0.01	+	79.09	0.0126	0.371
Wnt protein secretion (GO:0061355)	2	1	0.01	+	79.09	0.0126	0.37
planar cell polarity pathway involved in heart morphogenesis (GO:0061346)	2	1	0.01	+	79.09	0.0126	0.37
non-canonical Wnt signaling pathway involved in heart development (GO:0061341)	2	1	0.01	+	79.09	0.0126	0.369
planar cell polarity pathway involved in gastrula mediolateral intercalation (GO:0060775)	2	1	0.01	+	79.09	0.0126	0.368
fasciculation of motor neuron axon (GO:0097156)	2	1	0.01	+	79.09	0.0126	0.368
corticospinal neuron axon guidance (GO:0021966)	2	1	0.01	+	79.09	0.0126	0.367
cerebellar granule cell precursor tangential migration (GO:0021935)	2	1	0.01	+	79.09	0.0126	0.366
ultradian rhythm (GO:0007624)	2	1	0.01	+	79.09	0.0126	0.366
branch elongation involved in salivary gland morphogenesis (GO:0060667)	2	1	0.01	+	79.09	0.0126	0.365
cardiac right atrium morphogenesis (GO:0003213)	2	1	0.01	+	79.09	0.0126	0.364
mammary gland bud formation (GO:0060615)	2	1	0.01	+	79.09	0.0126	0.364
lateral sprouting involved in mammary gland duct morphogenesis (GO:0060599)	2	1	0.01	+	79.09	0.0126	0.363
fibroblast growth factor receptor signaling pathway involved in mammary gland specification (GO:0060595)	2	1	0.01	+	79.09	0.0126	0.362
squamous basal epithelial stem cell differentiation involved in prostate gland acinus development (GO:0060529)	2	1	0.01	+	79.09	0.0126	0.362
response to anesthetic (GO:0072347)	3	1	0.02	+	52.73	0.0188	0.491
cytoplasmic actin-based contraction involved in cell motility (GO:0060327)	3	1	0.02	+	52.73	0.0188	0.491
tangential migration from the subventricular zone to the olfactory bulb (GO:0022028)	9	3	0.06	+	52.73	2.88e-05	0.00416
vagus nerve development (GO:0021564)	3	1	0.02	+	52.73	0.0188	0.49
regulation of dense core granule biogenesis (GO:2000705)	3	1	0.02	+	52.73	0.0188	0.489
negative regulation of smooth muscle cell chemotaxis (GO:0071672)	3	1	0.02	+	52.73	0.0188	0.488
negative regulation of granulocyte chemotaxis (GO:0071623)	3	1	0.02	+	52.73	0.0188	0.487
thyroid hormone mediated signaling pathway (GO:0002154)	3	1	0.02	+	52.73	0.0188	0.487
establishment of neuroblast polarity (GO:0045200)	3	1	0.02	+	52.73	0.0188	0.486
establishment or maintenance of neuroblast polarity (GO:0045196)	3	1	0.02	+	52.73	0.0188	0.485
negative regulation of adenylate cyclase-activating adrenergic receptor signaling pathway involved in heart process (GO:0140199)	3	1	0.02	+	52.73	0.0188	0.484
hypophysis morphogenesis (GO:0048850)	3	1	0.02	+	52.73	0.0188	0.483
maintenance of presynaptic active zone structure (GO:0048790)	3	1	0.02	+	52.73	0.0188	0.483
membrane depolarization during atrial cardiac muscle cell action potential (GO:0098912)	3	1	0.02	+	52.73	0.0188	0.482
positive regulation of vitamin D receptor signaling pathway (GO:0070564)	3	1	0.02	+	52.73	0.0188	0.481
negative regulation of neutrophil chemotaxis (GO:0090024)	3	1	0.02	+	52.73	0.0188	0.48
circadian sleep/wake cycle, sleep (GO:0050802)	3	1	0.02	+	52.73	0.0188	0.479
negative regulation of chemokine-mediated signaling pathway (GO:0070100)	6	2	0.04	+	52.73	0.000697	0.0543
chemorepulsion of axon (GO:0061643)	6	2	0.04	+	52.73	0.000697	0.054
Roundabout signaling pathway (GO:0035385)	6	2	0.04	+	52.73	0.000697	0.0538
calcium ion transmembrane transport via high voltage-gated calcium channel (GO:0061577)	3	1	0.02	+	52.73	0.0188	0.479
mesenchymal cell proliferation involved in lung development (GO:0060916)	3	1	0.02	+	52.73	0.0188	0.478
melanocyte proliferation (GO:0097325)	3	1	0.02	+	52.73	0.0188	0.477
behavioral response to formalin induced pain (GO:0061368)	3	1	0.02	+	52.73	0.0188	0.476
behavioral response to chemical pain (GO:0061366)	3	1	0.02	+	52.73	0.0188	0.476
positive regulation of Wnt protein secretion (GO:0061357)	3	1	0.02	+	52.73	0.0188	0.475
lymphatic endothelial cell fate commitment (GO:0060838)	3	1	0.02	+	52.73	0.0188	0.474
planar cell polarity pathway involved in axis elongation (GO:0003402)	3	1	0.02	+	52.73	0.0188	0.473
mesodermal to mesenchymal transition involved in gastrulation (GO:0060809)	3	1	0.02	+	52.73	0.0188	0.473
negative regulation of lamellipodium assembly (GO:0010593)	3	1	0.02	+	52.73	0.0188	0.472
fasciculation of sensory neuron axon (GO:0097155)	3	1	0.02	+	52.73	0.0188	0.471
hindbrain tangential cell migration (GO:0021934)	3	1	0.02	+	52.73	0.0188	0.47
female courtship behavior (GO:0008050)	3	1	0.02	+	52.73	0.0188	0.47
olfactory bulb interneuron development (GO:0021891)	9	3	0.06	+	52.73	2.88e-05	0.00412
cardiac muscle tissue regeneration (GO:0061026)	3	1	0.02	+	52.73	0.0188	0.469
ventricular zone neuroblast division (GO:0021847)	3	1	0.02	+	52.73	0.0188	0.468
primary heart field specification (GO:0003138)	3	1	0.02	+	52.73	0.0188	0.467
prostate epithelial cord elongation (GO:0060523)	3	1	0.02	+	52.73	0.0188	0.467
imitative learning (GO:0098596)	7	2	0.04	+	45.20	0.000944	0.0688
vocal learning (GO:0042297)	7	2	0.04	+	45.20	0.000944	0.0685
mammary duct terminal end bud growth (GO:0060763)	7	2	0.04	+	45.20	0.000944	0.0682
cerebral cortex tangential migration (GO:0021800)	7	2	0.04	+	45.20	0.000944	0.0679
positive regulation of epithelial cell proliferation involved in lung morphogenesis (GO:0060501)	7	2	0.04	+	45.20	0.000944	0.0676
olfactory bulb interneuron differentiation (GO:0021889)	15	4	0.09	+	42.18	3e-06	0.000575
striatal medium spiny neuron differentiation (GO:0021773)	4	1	0.03	+	39.55	0.025	0.583
regulation of calcium ion-dependent exocytosis of neurotransmitter (GO:1903233)	4	1	0.03	+	39.55	0.025	0.582
glossopharyngeal nerve morphogenesis (GO:0021615)	4	1	0.03	+	39.55	0.025	0.582
negative regulation of neutrophil migration (GO:1902623)	4	1	0.03	+	39.55	0.025	0.581
negative regulation of adenylate cyclase-activating adrenergic receptor signaling pathway (GO:0071878)	4	1	0.03	+	39.55	0.025	0.58
JUN phosphorylation (GO:0007258)	4	1	0.03	+	39.55	0.025	0.579
Wnt signaling pathway, calcium modulating pathway (GO:0007223)	4	1	0.03	+	39.55	0.025	0.578
negative regulation of growth hormone secretion (GO:0060125)	4	1	0.03	+	39.55	0.025	0.577
epithelial cell proliferation involved in renal tubule morphogenesis (GO:2001013)	4	1	0.03	+	39.55	0.025	0.577
smooth muscle contraction involved in micturition (GO:0060083)	4	1	0.03	+	39.55	0.025	0.576
desmosome assembly (GO:0002159)	4	1	0.03	+	39.55	0.025	0.575
gamma-aminobutyric acid import (GO:0051939)	4	1	0.03	+	39.55	0.025	0.574
cellular response to heparin (GO:0071504)	4	1	0.03	+	39.55	0.025	0.573
neuron projection extension involved in neuron projection guidance (GO:1902284)	8	2	0.05	+	39.55	0.00123	0.0844
netrin-activated signaling pathway (GO:0038007)	8	2	0.05	+	39.55	0.00123	0.0841
clustering of voltage-gated potassium channels (GO:0045163)	4	1	0.03	+	39.55	0.025	0.572
atrial cardiac muscle cell membrane repolarization (GO:0099624)	4	1	0.03	+	39.55	0.025	0.571
positive regulation of anion channel activity (GO:1901529)	4	1	0.03	+	39.55	0.025	0.571
regulation of adenylate cyclase-activating adrenergic receptor signaling pathway involved in heart process (GO:0140192)	4	1	0.03	+	39.55	0.025	0.57
axon extension involved in axon guidance (GO:0048846)	8	2	0.05	+	39.55	0.00123	0.0837
NMDA selective glutamate receptor signaling pathway (GO:0098989)	4	1	0.03	+	39.55	0.025	0.569
membrane repolarization during atrial cardiac muscle cell action potential (GO:0098914)	4	1	0.03	+	39.55	0.025	0.568
positive regulation of heart induction (GO:1901321)	4	1	0.03	+	39.55	0.025	0.567
positive regulation of heart induction by negative regulation of canonical Wnt signaling pathway (GO:0090082)	4	1	0.03	+	39.55	0.025	0.567
positive regulation of microtubule nucleation (GO:0090063)	4	1	0.03	+	39.55	0.025	0.566
serotonergic neuron axon guidance (GO:0036515)	4	1	0.03	+	39.55	0.025	0.565
positive regulation of calcium ion transmembrane transport via high voltage-gated calcium channel (GO:1904879)	4	1	0.03	+	39.55	0.025	0.564
positive regulation of connective tissue replacement (GO:1905205)	4	1	0.03	+	39.55	0.025	0.563
negative regulation of myofibroblast differentiation (GO:1904761)	4	1	0.03	+	39.55	0.025	0.562
pseudopodium organization (GO:0031268)	4	1	0.03	+	39.55	0.025	0.562
cell communication by electrical coupling involved in cardiac conduction (GO:0086064)	4	1	0.03	+	39.55	0.025	0.561
regulation of Toll signaling pathway (GO:0008592)	4	1	0.03	+	39.55	0.025	0.56
regulation of Wnt protein secretion (GO:0061356)	4	1	0.03	+	39.55	0.025	0.559
regulation of locomotor rhythm (GO:1904059)	4	1	0.03	+	39.55	0.025	0.558
prostate gland morphogenetic growth (GO:0060737)	4	1	0.03	+	39.55	0.025	0.558
neuroligin clustering involved in postsynaptic membrane assembly (GO:0097118)	4	1	0.03	+	39.55	0.025	0.557
circadian sleep/wake cycle process (GO:0022410)	4	1	0.03	+	39.55	0.025	0.556
negative regulation of prostatic bud formation (GO:0060686)	4	1	0.03	+	39.55	0.025	0.555
mammary gland bud morphogenesis (GO:0060648)	4	1	0.03	+	39.55	0.025	0.555
negative regulation of transcription initiation from RNA polymerase II promoter (GO:0060633)	4	1	0.03	+	39.55	0.025	0.554
endodermal digestive tract morphogenesis (GO:0061031)	4	1	0.03	+	39.55	0.025	0.553
modulation of microtubule cytoskeleton involved in cerebral cortex radial glia guided migration (GO:0021815)	4	1	0.03	+	39.55	0.025	0.552
mammary gland specification (GO:0060594)	4	1	0.03	+	39.55	0.025	0.551
regulation of epithelial cell proliferation involved in lung morphogenesis (GO:2000794)	9	2	0.06	+	35.15	0.00155	0.0999
trans-synaptic signaling by trans-synaptic complex (GO:0099545)	9	2	0.06	+	35.15	0.00155	0.0995
observational learning (GO:0098597)	9	2	0.06	+	35.15	0.00155	0.0991
regulation of chemokine-mediated signaling pathway (GO:0070099)	9	2	0.06	+	35.15	0.00155	0.0987
spontaneous neurotransmitter secretion (GO:0061669)	9	2	0.06	+	35.15	0.00155	0.0983
lateral sprouting from an epithelium (GO:0060601)	9	2	0.06	+	35.15	0.00155	0.0979
retinal ganglion cell axon guidance (GO:0031290)	19	4	0.12	+	33.30	7.56e-06	0.00131
calcium ion import across plasma membrane (GO:0098703)	15	3	0.09	+	31.64	0.00013	0.0152
midgut development (GO:0007494)	5	1	0.03	+	31.64	0.0311	0.649
acrosomal vesicle exocytosis (GO:0060478)	5	1	0.03	+	31.64	0.0311	0.648
negative regulation of lamellipodium organization (GO:1902744)	5	1	0.03	+	31.64	0.0311	0.647
trigeminal nerve structural organization (GO:0021637)	5	1	0.03	+	31.64	0.0311	0.646
trigeminal nerve morphogenesis (GO:0021636)	5	1	0.03	+	31.64	0.0311	0.646
glossopharyngeal nerve development (GO:0021563)	5	1	0.03	+	31.64	0.0311	0.645
urinary bladder development (GO:0060157)	5	1	0.03	+	31.64	0.0311	0.644
maternal process involved in parturition (GO:0060137)	5	1	0.03	+	31.64	0.0311	0.643
soft palate development (GO:0060023)	5	1	0.03	+	31.64	0.0311	0.642
regulation of thyroid hormone mediated signaling pathway (GO:0002155)	5	1	0.03	+	31.64	0.0311	0.641
response to heparin (GO:0071503)	5	1	0.03	+	31.64	0.0311	0.64
non-canonical Wnt signaling pathway via JNK cascade (GO:0038031)	5	1	0.03	+	31.64	0.0311	0.64
regulation of timing of anagen (GO:0051884)	5	1	0.03	+	31.64	0.0311	0.639
positive regulation of synaptic vesicle exocytosis (GO:2000302)	5	1	0.03	+	31.64	0.0311	0.638
protein localization to juxtaparanode region of axon (GO:0071205)	5	1	0.03	+	31.64	0.0311	0.637
positive regulation of hair follicle maturation (GO:0048818)	5	1	0.03	+	31.64	0.0311	0.636
regulation of postsynaptic cytosolic calcium ion concentration (GO:0099566)	5	1	0.03	+	31.64	0.0311	0.635
negative regulation of DNA-templated transcription, initiation (GO:2000143)	5	1	0.03	+	31.64	0.0311	0.635
calcium-dependent activation of synaptic vesicle fusion (GO:0099502)	5	1	0.03	+	31.64	0.0311	0.634
regulation of retinal ganglion cell axon guidance (GO:0090259)	5	1	0.03	+	31.64	0.0311	0.633
branching morphogenesis of a nerve (GO:0048755)	5	1	0.03	+	31.64	0.0311	0.632
retrograde trans-synaptic signaling by trans-synaptic protein complex (GO:0098942)	5	1	0.03	+	31.64	0.0311	0.631
regulation of cardiac muscle cell action potential involved in regulation of contraction (GO:0098909)	5	1	0.03	+	31.64	0.0311	0.631
central nervous system myelin formation (GO:0032289)	5	1	0.03	+	31.64	0.0311	0.63
modification of postsynaptic actin cytoskeleton (GO:0098885)	10	2	0.06	+	31.64	0.0019	0.112
regulation of heart induction by regulation of canonical Wnt signaling pathway (GO:0090081)	5	1	0.03	+	31.64	0.0311	0.629
positive regulation of the force of heart contraction (GO:0098735)	5	1	0.03	+	31.64	0.0311	0.628
positive regulation of synaptic vesicle fusion to presynaptic active zone membrane (GO:0031632)	5	1	0.03	+	31.64	0.0311	0.627
Wnt signaling pathway involved in midbrain dopaminergic neuron differentiation (GO:1904953)	5	1	0.03	+	31.64	0.0311	0.627
learned vocalization behavior or vocal learning (GO:0098598)	10	2	0.06	+	31.64	0.0019	0.111
regulation of myofibroblast differentiation (GO:1904760)	5	1	0.03	+	31.64	0.0311	0.626
negative regulation of secondary metabolite biosynthetic process (GO:1900377)	5	1	0.03	+	31.64	0.0311	0.625
negative regulation of melanin biosynthetic process (GO:0048022)	5	1	0.03	+	31.64	0.0311	0.624
positive regulation of Notch signaling pathway involved in heart induction (GO:0035481)	5	1	0.03	+	31.64	0.0311	0.623
regulation of Notch signaling pathway involved in heart induction (GO:0035480)	5	1	0.03	+	31.64	0.0311	0.623
chemoattraction of axon (GO:0061642)	5	1	0.03	+	31.64	0.0311	0.622
membrane depolarization during AV node cell action potential (GO:0086045)	5	1	0.03	+	31.64	0.0311	0.621
axon midline choice point recognition (GO:0016199)	5	1	0.03	+	31.64	0.0311	0.62
growth hormone secretion (GO:0030252)	5	1	0.03	+	31.64	0.0311	0.619
cell adhesion involved in heart morphogenesis (GO:0061343)	5	1	0.03	+	31.64	0.0311	0.619
development of secondary female sexual characteristics (GO:0046543)	10	2	0.06	+	31.64	0.0019	0.111
positive regulation of membrane tubulation (GO:1903527)	5	1	0.03	+	31.64	0.0311	0.618
regulation of branching involved in mammary gland duct morphogenesis (GO:0060762)	5	1	0.03	+	31.64	0.0311	0.617
epithelial cell proliferation involved in mammary gland duct elongation (GO:0060750)	5	1	0.03	+	31.64	0.0311	0.616
Wnt signaling pathway involved in heart development (GO:0003306)	5	1	0.03	+	31.64	0.0311	0.616
positive regulation of dendritic spine maintenance (GO:1902952)	5	1	0.03	+	31.64	0.0311	0.615
calcium ion import into cytosol (GO:1902656)	16	3	0.1	+	29.66	0.000157	0.0175
mechanosensory behavior (GO:0007638)	16	3	0.1	+	29.66	0.000157	0.0174
limb bud formation (GO:0060174)	11	2	0.07	+	28.76	0.00229	0.128
spontaneous synaptic transmission (GO:0098814)	11	2	0.07	+	28.76	0.00229	0.127
inhibitory synapse assembly (GO:1904862)	11	2	0.07	+	28.76	0.00229	0.127
atrial cardiac muscle cell to AV node cell signaling (GO:0086026)	11	2	0.07	+	28.76	0.00229	0.126
atrial cardiac muscle cell action potential (GO:0086014)	11	2	0.07	+	28.76	0.00229	0.126
branchiomotor neuron axon guidance (GO:0021785)	6	1	0.04	+	26.36	0.0372	0.706
negative regulation of mammary gland epithelial cell proliferation (GO:0033600)	6	1	0.04	+	26.36	0.0372	0.705
regulation of grooming behavior (GO:2000821)	6	1	0.04	+	26.36	0.0372	0.704
regulation of membrane hyperpolarization (GO:1902630)	6	1	0.04	+	26.36	0.0372	0.704
negative regulation of apoptotic process in bone marrow cell (GO:0071866)	6	1	0.04	+	26.36	0.0372	0.703
regulation of apoptotic process in bone marrow cell (GO:0071865)	6	1	0.04	+	26.36	0.0372	0.702
intramembranous ossification (GO:0001957)	6	1	0.04	+	26.36	0.0372	0.701
positive regulation of transcription of Notch receptor target (GO:0007221)	6	1	0.04	+	26.36	0.0372	0.7
common-partner SMAD protein phosphorylation (GO:0007182)	6	1	0.04	+	26.36	0.0372	0.699
regulation of smooth muscle cell chemotaxis (GO:0071671)	6	1	0.04	+	26.36	0.0372	0.699
semaphorin-plexin signaling pathway involved in axon guidance (GO:1902287)	12	2	0.08	+	26.36	0.00272	0.144
non-canonical Wnt signaling pathway via MAPK cascade (GO:0038030)	6	1	0.04	+	26.36	0.0372	0.698
blood vessel endothelial cell proliferation involved in sprouting angiogenesis (GO:0002043)	6	1	0.04	+	26.36	0.0372	0.697
presynaptic active zone organization (GO:1990709)	6	1	0.04	+	26.36	0.0372	0.696
regulation of heart induction (GO:0090381)	6	1	0.04	+	26.36	0.0372	0.695
diencephalon morphogenesis (GO:0048852)	6	1	0.04	+	26.36	0.0372	0.694
smooth muscle cell proliferation (GO:0048659)	6	1	0.04	+	26.36	0.0372	0.694
negative regulation of monocyte chemotaxis (GO:0090027)	6	1	0.04	+	26.36	0.0372	0.693
positive regulation of vascular endothelial growth factor signaling pathway (GO:1900748)	6	1	0.04	+	26.36	0.0372	0.692
dopaminergic neuron axon guidance (GO:0036514)	6	1	0.04	+	26.36	0.0372	0.691
regulation of synaptic membrane adhesion (GO:0099179)	6	1	0.04	+	26.36	0.0372	0.69
negative regulation of relaxation of muscle (GO:1901078)	6	1	0.04	+	26.36	0.0372	0.69
positive regulation of thymocyte apoptotic process (GO:0070245)	6	1	0.04	+	26.36	0.0372	0.689
sodium ion export across plasma membrane (GO:0036376)	12	2	0.08	+	26.36	0.00272	0.144
planar cell polarity pathway involved in axon guidance (GO:1904938)	6	1	0.04	+	26.36	0.0372	0.688
regulation of connective tissue replacement (GO:1905203)	6	1	0.04	+	26.36	0.0372	0.687
positive regulation of protein localization to cell cortex (GO:1904778)	6	1	0.04	+	26.36	0.0372	0.686
circadian sleep/wake cycle (GO:0042745)	6	1	0.04	+	26.36	0.0372	0.685
direct ossification (GO:0036072)	6	1	0.04	+	26.36	0.0372	0.685
thelarche (GO:0042695)	6	1	0.04	+	26.36	0.0372	0.684
asymmetric neuroblast division (GO:0055059)	6	1	0.04	+	26.36	0.0372	0.683
histone-threonine phosphorylation (GO:0035405)	6	1	0.04	+	26.36	0.0372	0.682
habituation (GO:0046959)	6	1	0.04	+	26.36	0.0372	0.682
regulation of microtubule nucleation (GO:0010968)	6	1	0.04	+	26.36	0.0372	0.681
atrial cardiac muscle cell to AV node cell communication (GO:0086066)	12	2	0.08	+	26.36	0.00272	0.143
regulation of membrane tubulation (GO:1903525)	6	1	0.04	+	26.36	0.0372	0.68
branch elongation involved in mammary gland duct branching (GO:0060751)	6	1	0.04	+	26.36	0.0372	0.679
mammary gland branching involved in thelarche (GO:0060744)	6	1	0.04	+	26.36	0.0372	0.678
positive regulation of female receptivity (GO:0045925)	6	1	0.04	+	26.36	0.0372	0.678
regulation of prostatic bud formation (GO:0060685)	6	1	0.04	+	26.36	0.0372	0.677
courtship behavior (GO:0007619)	6	1	0.04	+	26.36	0.0372	0.676
Toll signaling pathway (GO:0008063)	6	1	0.04	+	26.36	0.0372	0.675
negative regulation of anion channel activity (GO:0010360)	6	1	0.04	+	26.36	0.0372	0.674
forebrain ventricular zone progenitor cell division (GO:0021869)	6	1	0.04	+	26.36	0.0372	0.674
cell motility involved in cerebral cortex radial glia guided migration (GO:0021814)	6	1	0.04	+	26.36	0.0372	0.673
negative regulation of neuron migration (GO:2001223)	13	2	0.08	+	24.34	0.00318	0.157
semaphorin-plexin signaling pathway involved in neuron projection guidance (GO:1902285)	13	2	0.08	+	24.34	0.00318	0.156
neuronal ion channel clustering (GO:0045161)	13	2	0.08	+	24.34	0.00318	0.156
development of secondary sexual characteristics (GO:0045136)	13	2	0.08	+	24.34	0.00318	0.155
auditory behavior (GO:0031223)	13	2	0.08	+	24.34	0.00318	0.155
cellular response to forskolin (GO:1904322)	13	2	0.08	+	24.34	0.00318	0.154
response to forskolin (GO:1904321)	13	2	0.08	+	24.34	0.00318	0.154
regulation of neuron projection arborization (GO:0150011)	13	2	0.08	+	24.34	0.00318	0.153
regulation of anion channel activity (GO:0010359)	13	2	0.08	+	24.34	0.00318	0.153
regulation of neuron migration (GO:2001222)	54	8	0.34	+	23.44	2.8e-09	8.99e-07
bud elongation involved in lung branching (GO:0060449)	7	1	0.04	+	22.60	0.0433	0.749
positive regulation of gastrulation (GO:2000543)	7	1	0.04	+	22.60	0.0433	0.748
convergent extension involved in organogenesis (GO:0060029)	7	1	0.04	+	22.60	0.0433	0.747
lacrimal gland development (GO:0032808)	7	1	0.04	+	22.60	0.0433	0.747
regulation of relaxation of cardiac muscle (GO:1901897)	7	1	0.04	+	22.60	0.0433	0.746
positive regulation of gamma-aminobutyric acid secretion (GO:0014054)	7	1	0.04	+	22.60	0.0433	0.745
clustering of voltage-gated sodium channels (GO:0045162)	7	1	0.04	+	22.60	0.0433	0.744
Cdc42 protein signal transduction (GO:0032488)	7	1	0.04	+	22.60	0.0433	0.743
regulation of vitamin D receptor signaling pathway (GO:0070562)	7	1	0.04	+	22.60	0.0433	0.743
positive regulation of vascular associated smooth muscle cell apoptotic process (GO:1905461)	7	1	0.04	+	22.60	0.0433	0.742
otic vesicle formation (GO:0030916)	7	1	0.04	+	22.60	0.0433	0.741
AV node cell to bundle of His cell signaling (GO:0086027)	7	1	0.04	+	22.60	0.0433	0.74
AV node cell action potential (GO:0086016)	7	1	0.04	+	22.60	0.0433	0.739
axon choice point recognition (GO:0016198)	7	1	0.04	+	22.60	0.0433	0.739
positive regulation of neuron projection arborization (GO:0150012)	7	1	0.04	+	22.60	0.0433	0.738
endothelial cell fate commitment (GO:0060839)	7	1	0.04	+	22.60	0.0433	0.737
anterior commissure morphogenesis (GO:0021960)	7	1	0.04	+	22.60	0.0433	0.736
radial glia guided migration of Purkinje cell (GO:0021942)	7	1	0.04	+	22.60	0.0433	0.735
epithelial cell proliferation involved in salivary gland morphogenesis (GO:0060664)	7	1	0.04	+	22.60	0.0433	0.735
negative regulation of Arp2/3 complex-mediated actin nucleation (GO:0034316)	7	1	0.04	+	22.60	0.0433	0.734
forebrain neuroblast division (GO:0021873)	7	1	0.04	+	22.60	0.0433	0.733
prostate epithelial cord arborization involved in prostate glandular acinus morphogenesis (GO:0060527)	7	1	0.04	+	22.60	0.0433	0.732
prostate glandular acinus morphogenesis (GO:0060526)	7	1	0.04	+	22.60	0.0433	0.731
type I pneumocyte differentiation (GO:0060509)	7	1	0.04	+	22.60	0.0433	0.731
presynapse assembly (GO:0099054)	21	3	0.13	+	22.60	0.000346	0.0315
regulation of axon guidance (GO:1902667)	15	2	0.09	+	21.09	0.00419	0.189
modification of postsynaptic structure (GO:0099010)	15	2	0.09	+	21.09	0.00419	0.189
pyramidal neuron differentiation (GO:0021859)	15	2	0.09	+	21.09	0.00419	0.188
olfactory bulb development (GO:0021772)	38	5	0.24	+	20.81	5.11e-06	0.000925
negative regulation of action potential (GO:0045759)	8	1	0.05	+	19.77	0.0493	0.795
hindgut morphogenesis (GO:0007442)	8	1	0.05	+	19.77	0.0493	0.794
substrate-dependent cell migration, cell extension (GO:0006930)	8	1	0.05	+	19.77	0.0493	0.793
positive regulation of tissue remodeling (GO:0034105)	8	1	0.05	+	19.77	0.0493	0.792
cranial suture morphogenesis (GO:0060363)	8	1	0.05	+	19.77	0.0493	0.792
positive regulation of synaptic vesicle clustering (GO:2000809)	8	1	0.05	+	19.77	0.0493	0.791
negative regulation of mesenchymal cell proliferation (GO:0072201)	8	1	0.05	+	19.77	0.0493	0.79
regulation of CD8-positive, alpha-beta T cell proliferation (GO:2000564)	8	1	0.05	+	19.77	0.0493	0.789
convergent extension involved in axis elongation (GO:0060028)	8	1	0.05	+	19.77	0.0493	0.788
convergent extension involved in gastrulation (GO:0060027)	8	1	0.05	+	19.77	0.0493	0.788
negative regulation of synapse assembly (GO:0051964)	8	1	0.05	+	19.77	0.0493	0.787
cellular response to histamine (GO:0071420)	8	1	0.05	+	19.77	0.0493	0.786
adenosine to inosine editing (GO:0006382)	8	1	0.05	+	19.77	0.0493	0.785
cellular response to caffeine (GO:0071313)	8	1	0.05	+	19.77	0.0493	0.784
basement membrane assembly (GO:0070831)	8	1	0.05	+	19.77	0.0493	0.784
positive regulation of cell-cell adhesion mediated by cadherin (GO:2000049)	8	1	0.05	+	19.77	0.0493	0.783
dendrite self-avoidance (GO:0070593)	16	2	0.1	+	19.77	0.00475	0.207
detection of calcium ion (GO:0005513)	8	1	0.05	+	19.77	0.0493	0.782
negative regulation of synaptic transmission, GABAergic (GO:0032229)	8	1	0.05	+	19.77	0.0493	0.781
regulation of neurotransmitter receptor localization to postsynaptic specialization membrane (GO:0098696)	16	2	0.1	+	19.77	0.00475	0.207
negative regulation of morphogenesis of an epithelium (GO:1905331)	8	1	0.05	+	19.77	0.0493	0.781
regulation of modification of postsynaptic actin cytoskeleton (GO:1905274)	8	1	0.05	+	19.77	0.0493	0.78
regulation of voltage-gated sodium channel activity (GO:1905150)	8	1	0.05	+	19.77	0.0493	0.779
negative regulation of vascular associated smooth muscle cell differentiation (GO:1905064)	8	1	0.05	+	19.77	0.0493	0.778
neuroblast division (GO:0055057)	16	2	0.1	+	19.77	0.00475	0.206
positive regulation of protein kinase C activity (GO:1900020)	8	1	0.05	+	19.77	0.0493	0.777
regulation of protein kinase C activity (GO:1900019)	8	1	0.05	+	19.77	0.0493	0.777
membrane repolarization during cardiac muscle cell action potential (GO:0086013)	8	1	0.05	+	19.77	0.0493	0.776
regulation of skeletal muscle acetylcholine-gated channel clustering (GO:1904393)	8	1	0.05	+	19.77	0.0493	0.775
cell communication by electrical coupling (GO:0010644)	8	1	0.05	+	19.77	0.0493	0.774
lymphatic endothelial cell differentiation (GO:0060836)	8	1	0.05	+	19.77	0.0493	0.774
negative regulation of Wnt signaling pathway involved in heart development (GO:0003308)	8	1	0.05	+	19.77	0.0493	0.773
positive regulation of inhibitory postsynaptic potential (GO:0097151)	8	1	0.05	+	19.77	0.0493	0.772
positive regulation of muscle adaptation (GO:0014744)	8	1	0.05	+	19.77	0.0493	0.771
olfactory lobe development (GO:0021988)	41	5	0.26	+	19.29	7.36e-06	0.00129
presynapse organization (GO:0099172)	25	3	0.16	+	18.98	0.000574	0.0478
neuron recognition (GO:0008038)	51	6	0.32	+	18.61	1.07e-06	0.000232
pulmonary valve morphogenesis (GO:0003184)	17	2	0.11	+	18.61	0.00534	0.226
negative chemotaxis (GO:0050919)	43	5	0.27	+	18.39	9.25e-06	0.00153
substrate-dependent cell migration (GO:0006929)	26	3	0.16	+	18.25	0.000642	0.0521
forebrain neuron development (GO:0021884)	35	4	0.22	+	18.08	8.05e-05	0.0101
regulation of cardiac muscle hypertrophy in response to stress (GO:1903242)	9	1	0.06	+	17.58	0.0553	0.838
negative regulation of neuroblast proliferation (GO:0007406)	9	1	0.06	+	17.58	0.0553	0.837
lung lobe morphogenesis (GO:0060463)	9	1	0.06	+	17.58	0.0553	0.837
lung lobe development (GO:0060462)	9	1	0.06	+	17.58	0.0553	0.836
regulation of heart morphogenesis (GO:2000826)	9	1	0.06	+	17.58	0.0553	0.835
cellular response to epinephrine stimulus (GO:0071872)	9	1	0.06	+	17.58	0.0553	0.834
response to epinephrine (GO:0071871)	9	1	0.06	+	17.58	0.0553	0.833
membrane assembly (GO:0071709)	36	4	0.23	+	17.58	8.97e-05	0.0111
otic vesicle morphogenesis (GO:0071600)	9	1	0.06	+	17.58	0.0553	0.833
dense core granule transport (GO:1901950)	9	1	0.06	+	17.58	0.0553	0.832
cellular response to follicle-stimulating hormone stimulus (GO:0071372)	9	1	0.06	+	17.58	0.0553	0.831
calcium ion export (GO:1901660)	9	1	0.06	+	17.58	0.0553	0.83
relaxation of smooth muscle (GO:0044557)	9	1	0.06	+	17.58	0.0553	0.829
cardiac muscle cell membrane repolarization (GO:0099622)	9	1	0.06	+	17.58	0.0553	0.829
phosphatidylserine exposure on apoptotic cell surface (GO:0070782)	9	1	0.06	+	17.58	0.0553	0.828
regulation of hair follicle maturation (GO:0048819)	9	1	0.06	+	17.58	0.0553	0.827
dense core granule cytoskeletal transport (GO:0099519)	9	1	0.06	+	17.58	0.0553	0.826
locomotion involved in locomotory behavior (GO:0031987)	9	1	0.06	+	17.58	0.0553	0.826
calcium ion-regulated exocytosis of neurotransmitter (GO:0048791)	18	2	0.11	+	17.58	0.00597	0.247
dense core granule localization (GO:0032253)	9	1	0.06	+	17.58	0.0553	0.825
modulation of inhibitory postsynaptic potential (GO:0098828)	9	1	0.06	+	17.58	0.0553	0.824
positive regulation of lipopolysaccharide-mediated signaling pathway (GO:0031666)	9	1	0.06	+	17.58	0.0553	0.823
negative regulation of actin nucleation (GO:0051126)	9	1	0.06	+	17.58	0.0553	0.822
paraxial mesoderm formation (GO:0048341)	9	1	0.06	+	17.58	0.0553	0.822
peptidyl-serine autophosphorylation (GO:0036289)	9	1	0.06	+	17.58	0.0553	0.821
insulin secretion involved in cellular response to glucose stimulus (GO:0035773)	9	1	0.06	+	17.58	0.0553	0.82
regulation of protein localization to cell cortex (GO:1904776)	9	1	0.06	+	17.58	0.0553	0.819
exocrine pancreas development (GO:0031017)	9	1	0.06	+	17.58	0.0553	0.819
nonassociative learning (GO:0046958)	9	1	0.06	+	17.58	0.0553	0.818
regulation of cardiac muscle cell membrane potential (GO:0086036)	9	1	0.06	+	17.58	0.0553	0.817
secondary palate development (GO:0062009)	27	3	0.17	+	17.58	0.000716	0.055
regulation of cardiac muscle contraction by regulation of the release of sequestered calcium ion (GO:0010881)	9	1	0.06	+	17.58	0.0553	0.816
hindgut development (GO:0061525)	9	1	0.06	+	17.58	0.0553	0.816
endothelial cell activation (GO:0042118)	9	1	0.06	+	17.58	0.0553	0.815
pericardium morphogenesis (GO:0003344)	9	1	0.06	+	17.58	0.0553	0.814
corticospinal tract morphogenesis (GO:0021957)	9	1	0.06	+	17.58	0.0553	0.813
mesenchymal-epithelial cell signaling (GO:0060638)	9	1	0.06	+	17.58	0.0553	0.812
synaptic vesicle clustering (GO:0097091)	9	1	0.06	+	17.58	0.0553	0.812
negative regulation of glial cell apoptotic process (GO:0034351)	9	1	0.06	+	17.58	0.0553	0.811
mammary gland formation (GO:0060592)	9	1	0.06	+	17.58	0.0553	0.81
morphogenesis of an epithelial bud (GO:0060572)	9	1	0.06	+	17.58	0.0553	0.809
specification of animal organ identity (GO:0010092)	19	2	0.12	+	16.65	0.00662	0.245
sodium ion import across plasma membrane (GO:0098719)	19	2	0.12	+	16.65	0.00662	0.244
branch elongation of an epithelium (GO:0060602)	19	2	0.12	+	16.65	0.00662	0.244
mammary gland duct morphogenesis (GO:0060603)	39	4	0.25	+	16.22	0.000122	0.0146
forebrain neuron differentiation (GO:0021879)	60	6	0.38	+	15.82	2.72e-06	0.000528
positive regulation of adenylate cyclase activity (GO:0045762)	10	1	0.06	+	15.82	0.0613	0.871
lung-associated mesenchyme development (GO:0060484)	10	1	0.06	+	15.82	0.0613	0.87
positive regulation of dopamine secretion (GO:0033603)	10	1	0.06	+	15.82	0.0613	0.869
facial nerve structural organization (GO:0021612)	10	1	0.06	+	15.82	0.0613	0.868
regulation of synaptic vesicle clustering (GO:2000807)	10	1	0.06	+	15.82	0.0613	0.868
positive regulation of cell proliferation in bone marrow (GO:0071864)	10	1	0.06	+	15.82	0.0613	0.867
hard palate development (GO:0060022)	10	1	0.06	+	15.82	0.0613	0.866
regulation of synapse structural plasticity (GO:0051823)	10	1	0.06	+	15.82	0.0613	0.865
glutamatergic neuron differentiation (GO:1905962)	10	1	0.06	+	15.82	0.0613	0.864
response to follicle-stimulating hormone (GO:0032354)	10	1	0.06	+	15.82	0.0613	0.864
negative regulation of collateral sprouting (GO:0048671)	10	1	0.06	+	15.82	0.0613	0.863
peptidyl-tyrosine dephosphorylation involved in inactivation of protein kinase activity (GO:1990264)	10	1	0.06	+	15.82	0.0613	0.862
primitive streak formation (GO:0090009)	10	1	0.06	+	15.82	0.0613	0.861
midbrain dopaminergic neuron differentiation (GO:1904948)	10	1	0.06	+	15.82	0.0613	0.861
negative regulation of chromatin binding (GO:0035562)	10	1	0.06	+	15.82	0.0613	0.86
synaptic vesicle priming (GO:0016082)	20	2	0.13	+	15.82	0.00731	0.263
regulation of cardiac muscle adaptation (GO:0010612)	10	1	0.06	+	15.82	0.0613	0.859
desmosome organization (GO:0002934)	10	1	0.06	+	15.82	0.0613	0.858
regulation of Wnt signaling pathway involved in heart development (GO:0003307)	10	1	0.06	+	15.82	0.0613	0.858
transition between fast and slow fiber (GO:0014883)	10	1	0.06	+	15.82	0.0613	0.857
presynaptic membrane assembly (GO:0097105)	10	1	0.06	+	15.82	0.0613	0.856
adherens junction maintenance (GO:0034334)	10	1	0.06	+	15.82	0.0613	0.855
parturition (GO:0007567)	10	1	0.06	+	15.82	0.0613	0.855
aortic valve morphogenesis (GO:0003180)	20	2	0.13	+	15.82	0.00731	0.263
membranous septum morphogenesis (GO:0003149)	10	1	0.06	+	15.82	0.0613	0.854
cell migration in hindbrain (GO:0021535)	21	2	0.13	+	15.07	0.00802	0.279
cell migration involved in sprouting angiogenesis (GO:0002042)	21	2	0.13	+	15.07	0.00802	0.278
modification of synaptic structure (GO:0099563)	21	2	0.13	+	15.07	0.00802	0.278
pulmonary valve development (GO:0003177)	21	2	0.13	+	15.07	0.00802	0.277
membrane biogenesis (GO:0044091)	43	4	0.27	+	14.72	0.000176	0.0184
synapse assembly (GO:0007416)	87	8	0.55	+	14.55	1.07e-07	2.67e-05
regulation of axon extension involved in axon guidance (GO:0048841)	33	3	0.21	+	14.38	0.00127	0.0863
cell communication involved in cardiac conduction (GO:0086065)	33	3	0.21	+	14.38	0.00127	0.0859
ventricular septum morphogenesis (GO:0060412)	44	4	0.28	+	14.38	0.000193	0.0196
negative regulation of osteoblast proliferation (GO:0033689)	11	1	0.07	+	14.38	0.0672	0.922
regulation of cell proliferation in bone marrow (GO:0071863)	11	1	0.07	+	14.38	0.0672	0.921
trigeminal nerve development (GO:0021559)	11	1	0.07	+	14.38	0.0672	0.92
neuronal action potential propagation (GO:0019227)	11	1	0.07	+	14.38	0.0672	0.919
glomerulus morphogenesis (GO:0072102)	11	1	0.07	+	14.38	0.0672	0.918
membrane raft assembly (GO:0001765)	11	1	0.07	+	14.38	0.0672	0.918
nerve growth factor signaling pathway (GO:0038180)	11	1	0.07	+	14.38	0.0672	0.917
cellular response to purine-containing compound (GO:0071415)	11	1	0.07	+	14.38	0.0672	0.916
protein localization to axon (GO:0099612)	11	1	0.07	+	14.38	0.0672	0.915
cAMP biosynthetic process (GO:0006171)	11	1	0.07	+	14.38	0.0672	0.914
retrograde trans-synaptic signaling (GO:0098917)	11	1	0.07	+	14.38	0.0672	0.914
regulation of cardiac muscle cell action potential (GO:0098901)	22	2	0.14	+	14.38	0.00877	0.298
regulation of synaptic transmission, dopaminergic (GO:0032225)	11	1	0.07	+	14.38	0.0672	0.913
action potential propagation (GO:0098870)	11	1	0.07	+	14.38	0.0672	0.912
positive regulation of protein kinase C signaling (GO:0090037)	11	1	0.07	+	14.38	0.0672	0.911
mitochondrial fragmentation involved in apoptotic process (GO:0043653)	11	1	0.07	+	14.38	0.0672	0.91
regulation of synaptic vesicle fusion to presynaptic active zone membrane (GO:0031630)	11	1	0.07	+	14.38	0.0672	0.91
negative regulation of dendrite morphogenesis (GO:0050774)	11	1	0.07	+	14.38	0.0672	0.909
presynaptic modulation of chemical synaptic transmission (GO:0099171)	11	1	0.07	+	14.38	0.0672	0.908
regulation of vascular associated smooth muscle cell apoptotic process (GO:1905459)	11	1	0.07	+	14.38	0.0672	0.907
gamma-aminobutyric acid transport (GO:0015812)	11	1	0.07	+	14.38	0.0672	0.907
AV node cell to bundle of His cell communication (GO:0086067)	11	1	0.07	+	14.38	0.0672	0.906
cell-cell signaling involved in cardiac conduction (GO:0086019)	22	2	0.14	+	14.38	0.00877	0.298
regulation of synaptic vesicle priming (GO:0010807)	11	1	0.07	+	14.38	0.0672	0.905
positive regulation of macrophage cytokine production (GO:0060907)	11	1	0.07	+	14.38	0.0672	0.904
smooth muscle cell migration (GO:0014909)	11	1	0.07	+	14.38	0.0672	0.903
postsynaptic membrane assembly (GO:0097104)	11	1	0.07	+	14.38	0.0672	0.903
regulation of female receptivity (GO:0045924)	11	1	0.07	+	14.38	0.0672	0.902
presynaptic membrane organization (GO:0097090)	11	1	0.07	+	14.38	0.0672	0.901
secondary heart field specification (GO:0003139)	11	1	0.07	+	14.38	0.0672	0.9
response to auditory stimulus (GO:0010996)	23	2	0.15	+	13.76	0.00954	0.319
establishment of epithelial cell polarity (GO:0090162)	35	3	0.22	+	13.56	0.0015	0.0982
facial nerve morphogenesis (GO:0021610)	12	1	0.08	+	13.18	0.0731	0.956
regulation of receptor localization to synapse (GO:1902683)	24	2	0.15	+	13.18	0.0103	0.34
facial nerve development (GO:0021561)	12	1	0.08	+	13.18	0.0731	0.956
regulation of calcium ion transmembrane transport via high voltage-gated calcium channel (GO:1902514)	12	1	0.08	+	13.18	0.0731	0.955
negative regulation of activin receptor signaling pathway (GO:0032926)	12	1	0.08	+	13.18	0.0731	0.954
micturition (GO:0060073)	12	1	0.08	+	13.18	0.0731	0.953
vagina development (GO:0060068)	12	1	0.08	+	13.18	0.0731	0.952
righting reflex (GO:0060013)	12	1	0.08	+	13.18	0.0731	0.952
negative regulation of synaptic transmission, glutamatergic (GO:0051967)	12	1	0.08	+	13.18	0.0731	0.951
calcineurin-NFAT signaling cascade (GO:0033173)	12	1	0.08	+	13.18	0.0731	0.95
positive regulation of hair follicle development (GO:0051798)	12	1	0.08	+	13.18	0.0731	0.949
peripheral nervous system neuron development (GO:0048935)	12	1	0.08	+	13.18	0.0731	0.949
peripheral nervous system neuron differentiation (GO:0048934)	12	1	0.08	+	13.18	0.0731	0.948
regulation of ventricular cardiac muscle cell action potential (GO:0098911)	12	1	0.08	+	13.18	0.0731	0.947
notochord morphogenesis (GO:0048570)	12	1	0.08	+	13.18	0.0731	0.946
membrane depolarization during cardiac muscle cell action potential (GO:0086012)	12	1	0.08	+	13.18	0.0731	0.945
membrane repolarization during action potential (GO:0086011)	12	1	0.08	+	13.18	0.0731	0.945
response to histamine (GO:0034776)	12	1	0.08	+	13.18	0.0731	0.944
synaptic vesicle docking (GO:0016081)	12	1	0.08	+	13.18	0.0731	0.943
cardiac cell fate commitment (GO:0060911)	12	1	0.08	+	13.18	0.0731	0.942
urinary bladder smooth muscle contraction (GO:0014832)	12	1	0.08	+	13.18	0.0731	0.942
motor neuron axon guidance (GO:0008045)	36	3	0.23	+	13.18	0.00163	0.101
forebrain generation of neurons (GO:0021872)	72	6	0.46	+	13.18	7.63e-06	0.00131
heart field specification (GO:0003128)	12	1	0.08	+	13.18	0.0731	0.941
prostate glandular acinus development (GO:0060525)	12	1	0.08	+	13.18	0.0731	0.94
positive regulation of mesenchymal cell proliferation (GO:0002053)	37	3	0.23	+	12.83	0.00176	0.106
regulation of cardiac muscle cell contraction (GO:0086004)	37	3	0.23	+	12.83	0.00176	0.106
axonal fasciculation (GO:0007413)	25	2	0.16	+	12.65	0.0112	0.365
muscle cell proliferation (GO:0033002)	25	2	0.16	+	12.65	0.0112	0.364
neuron projection fasciculation (GO:0106030)	25	2	0.16	+	12.65	0.0112	0.363
aortic valve development (GO:0003176)	25	2	0.16	+	12.65	0.0112	0.362
mammary gland epithelium development (GO:0061180)	64	5	0.4	+	12.36	6.08e-05	0.00811
branching involved in prostate gland morphogenesis (GO:0060442)	13	1	0.08	+	12.17	0.0789	1
cranial nerve structural organization (GO:0021604)	13	1	0.08	+	12.17	0.0789	1
positive regulation of type I interferon-mediated signaling pathway (GO:0060340)	13	1	0.08	+	12.17	0.0789	0.999
basement membrane organization (GO:0071711)	26	2	0.16	+	12.17	0.012	0.382
negative regulation of sodium ion transmembrane transporter activity (GO:2000650)	13	1	0.08	+	12.17	0.0789	0.998
regulation of high voltage-gated calcium channel activity (GO:1901841)	13	1	0.08	+	12.17	0.0789	0.997
regulation of gamma-aminobutyric acid secretion (GO:0014052)	13	1	0.08	+	12.17	0.0789	0.996
regulation of respiratory gaseous exchange by nervous system process (GO:0002087)	13	1	0.08	+	12.17	0.0789	0.996
planar cell polarity pathway involved in neural tube closure (GO:0090179)	13	1	0.08	+	12.17	0.0789	0.995
negative regulation of adenylate cyclase-activating G protein-coupled receptor signaling pathway (GO:0106072)	13	1	0.08	+	12.17	0.0789	0.994
regulation of synaptic transmission, GABAergic (GO:0032228)	39	3	0.25	+	12.17	0.00204	0.117
regulation of modification of postsynaptic structure (GO:0099159)	13	1	0.08	+	12.17	0.0789	0.993
peptidyl-serine dephosphorylation (GO:0070262)	13	1	0.08	+	12.17	0.0789	0.992
paraxial mesoderm morphogenesis (GO:0048340)	13	1	0.08	+	12.17	0.0789	0.992
regulation of secondary metabolic process (GO:0043455)	13	1	0.08	+	12.17	0.0789	0.991
cytoplasmic sequestering of transcription factor (GO:0042994)	13	1	0.08	+	12.17	0.0789	0.99
astral microtubule organization (GO:0030953)	13	1	0.08	+	12.17	0.0789	0.989
toxin metabolic process (GO:0009404)	13	1	0.08	+	12.17	0.0789	0.989
regulation of secondary metabolite biosynthetic process (GO:1900376)	13	1	0.08	+	12.17	0.0789	0.988
regulation of melanin biosynthetic process (GO:0048021)	13	1	0.08	+	12.17	0.0789	0.987
retinal cone cell differentiation (GO:0042670)	13	1	0.08	+	12.17	0.0789	0.986
sleep (GO:0030431)	13	1	0.08	+	12.17	0.0789	0.985
regulation of plasma membrane organization (GO:1903729)	13	1	0.08	+	12.17	0.0789	0.985
retinal cone cell development (GO:0046549)	13	1	0.08	+	12.17	0.0789	0.984
receptor localization to synapse (GO:0097120)	52	4	0.33	+	12.17	0.000361	0.0325
branching involved in labyrinthine layer morphogenesis (GO:0060670)	13	1	0.08	+	12.17	0.0789	0.983
regulation of glial cell apoptotic process (GO:0034350)	13	1	0.08	+	12.17	0.0789	0.982
pyramidal neuron development (GO:0021860)	13	1	0.08	+	12.17	0.0789	0.981
cerebral cortex cell migration (GO:0021795)	53	4	0.34	+	11.94	0.000388	0.0343
mammary gland morphogenesis (GO:0060443)	54	4	0.34	+	11.72	0.000416	0.0362
negative regulation of axon extension involved in axon guidance (GO:0048843)	27	2	0.17	+	11.72	0.0129	0.371
synaptic membrane adhesion (GO:0099560)	27	2	0.17	+	11.72	0.0129	0.37
telencephalon cell migration (GO:0022029)	68	5	0.43	+	11.63	8.06e-05	0.0101
positive regulation of macrophage differentiation (GO:0045651)	14	1	0.09	+	11.30	0.0847	1
cAMP metabolic process (GO:0046058)	14	1	0.09	+	11.30	0.0847	1
mitotic cell cycle arrest (GO:0071850)	14	1	0.09	+	11.30	0.0847	1
positive regulation of podosome assembly (GO:0071803)	14	1	0.09	+	11.30	0.0847	1
mammary gland epithelial cell proliferation (GO:0033598)	14	1	0.09	+	11.30	0.0847	1
female mating behavior (GO:0060180)	14	1	0.09	+	11.30	0.0847	1
inhibitory postsynaptic potential (GO:0060080)	14	1	0.09	+	11.30	0.0847	1
positive regulation of cardiac muscle cell proliferation (GO:0060045)	28	2	0.18	+	11.30	0.0139	0.39
otic vesicle development (GO:0071599)	14	1	0.09	+	11.30	0.0847	1
negative regulation of sodium ion transmembrane transport (GO:1902306)	14	1	0.09	+	11.30	0.0847	1
apical protein localization (GO:0045176)	14	1	0.09	+	11.30	0.0847	1
cellular response to gonadotropin stimulus (GO:0071371)	14	1	0.09	+	11.30	0.0847	1
cellular response to zinc ion (GO:0071294)	14	1	0.09	+	11.30	0.0847	1
negative regulation of neural precursor cell proliferation (GO:2000178)	28	2	0.18	+	11.30	0.0139	0.39
negative regulation of synapse organization (GO:1905809)	14	1	0.09	+	11.30	0.0847	1
positive regulation of non-canonical Wnt signaling pathway (GO:2000052)	14	1	0.09	+	11.30	0.0847	1
negative regulation of chemotaxis (GO:0050922)	56	4	0.35	+	11.30	0.000477	0.0406
circadian behavior (GO:0048512)	28	2	0.18	+	11.30	0.0139	0.389
base conversion or substitution editing (GO:0016553)	14	1	0.09	+	11.30	0.0847	1
oligosaccharide biosynthetic process (GO:0009312)	14	1	0.09	+	11.30	0.0847	1
regulation of cardiac muscle contraction by calcium ion signaling (GO:0010882)	14	1	0.09	+	11.30	0.0847	1
positive regulation of myotube differentiation (GO:0010831)	14	1	0.09	+	11.30	0.0847	1
positive regulation of dendrite extension (GO:1903861)	28	2	0.18	+	11.30	0.0139	0.388
type B pancreatic cell development (GO:0003323)	14	1	0.09	+	11.30	0.0847	1
prostate gland growth (GO:0060736)	14	1	0.09	+	11.30	0.0847	1
physiological cardiac muscle hypertrophy (GO:0003301)	14	1	0.09	+	11.30	0.0847	1
physiological muscle hypertrophy (GO:0003298)	14	1	0.09	+	11.30	0.0847	1
positive regulation of smooth muscle cell apoptotic process (GO:0034393)	14	1	0.09	+	11.30	0.0847	1
regulation of dendritic spine maintenance (GO:1902950)	14	1	0.09	+	11.30	0.0847	1
regulation of RNA polymerase II transcription preinitiation complex assembly (GO:0045898)	14	1	0.09	+	11.30	0.0847	1
cell growth involved in cardiac muscle cell development (GO:0061049)	14	1	0.09	+	11.30	0.0847	1
forebrain cell migration (GO:0021885)	71	5	0.45	+	11.14	9.86e-05	0.0121
calcium-ion regulated exocytosis (GO:0017156)	43	3	0.27	+	11.04	0.00269	0.143
central nervous system neuron axonogenesis (GO:0021955)	43	3	0.27	+	11.04	0.00269	0.143
establishment of planar polarity (GO:0001736)	29	2	0.18	+	10.91	0.0148	0.41
positive regulation of microtubule polymerization (GO:0031116)	29	2	0.18	+	10.91	0.0148	0.41
outflow tract septum morphogenesis (GO:0003148)	29	2	0.18	+	10.91	0.0148	0.409
reproductive behavior (GO:0019098)	44	3	0.28	+	10.79	0.00287	0.146
regulation of actin filament-based movement (GO:1903115)	45	3	0.28	+	10.55	0.00305	0.153
tripartite regional subdivision (GO:0007351)	15	1	0.09	+	10.55	0.0905	1
establishment of tissue polarity (GO:0007164)	30	2	0.19	+	10.55	0.0158	0.432
convergent extension (GO:0060026)	15	1	0.09	+	10.55	0.0905	1
maintenance of synapse structure (GO:0099558)	15	1	0.09	+	10.55	0.0905	1
postsynapse to nucleus signaling pathway (GO:0099527)	15	1	0.09	+	10.55	0.0905	1
regulation of establishment of planar polarity involved in neural tube closure (GO:0090178)	15	1	0.09	+	10.55	0.0905	1
induction of positive chemotaxis (GO:0050930)	15	1	0.09	+	10.55	0.0905	1
secretory granule localization (GO:0032252)	15	1	0.09	+	10.55	0.0905	1
lens fiber cell development (GO:0070307)	15	1	0.09	+	10.55	0.0905	1
positive regulation of T cell apoptotic process (GO:0070234)	15	1	0.09	+	10.55	0.0905	1
actin filament severing (GO:0051014)	15	1	0.09	+	10.55	0.0905	1
positive regulation of vesicle fusion (GO:0031340)	15	1	0.09	+	10.55	0.0905	1
regulation of vascular associated smooth muscle cell differentiation (GO:1905063)	15	1	0.09	+	10.55	0.0905	1
calcineurin-mediated signaling (GO:0097720)	15	1	0.09	+	10.55	0.0905	1
regulation of response to osmotic stress (GO:0047484)	15	1	0.09	+	10.55	0.0905	1
response to caffeine (GO:0031000)	15	1	0.09	+	10.55	0.0905	1
magnesium ion homeostasis (GO:0010960)	15	1	0.09	+	10.55	0.0905	1
anterior/posterior axis specification, embryo (GO:0008595)	15	1	0.09	+	10.55	0.0905	1
negative regulation of keratinocyte proliferation (GO:0010839)	15	1	0.09	+	10.55	0.0905	1
positive regulation of T cell chemotaxis (GO:0010820)	15	1	0.09	+	10.55	0.0905	1
viral budding (GO:0046755)	15	1	0.09	+	10.55	0.0905	1
negative regulation of production of miRNAs involved in gene silencing by miRNA (GO:1903799)	15	1	0.09	+	10.55	0.0905	1
response to gonadotropin (GO:0034698)	15	1	0.09	+	10.55	0.0905	1
epithelial cell differentiation involved in prostate gland development (GO:0060742)	15	1	0.09	+	10.55	0.0905	1
urinary tract smooth muscle contraction (GO:0014848)	15	1	0.09	+	10.55	0.0905	1
regulation of mesenchymal cell proliferation (GO:0010464)	45	3	0.28	+	10.55	0.00305	0.153
central nervous system projection neuron axonogenesis (GO:0021952)	30	2	0.19	+	10.55	0.0158	0.431
hindbrain radial glia guided cell migration (GO:0021932)	15	1	0.09	+	10.55	0.0905	1
rhythmic behavior (GO:0007622)	30	2	0.19	+	10.55	0.0158	0.431
axon guidance (GO:0007411)	231	15	1.46	+	10.27	3.01e-11	2.37e-08
neuron projection guidance (GO:0097485)	232	15	1.47	+	10.23	3.19e-11	2.39e-08
regulation of protein localization to synapse (GO:1902473)	31	2	0.2	+	10.21	0.0168	0.454
regulation of the force of heart contraction (GO:0002026)	31	2	0.2	+	10.21	0.0168	0.453
axis elongation (GO:0003401)	31	2	0.2	+	10.21	0.0168	0.452
midbrain development (GO:0030901)	47	3	0.3	+	10.10	0.00344	0.163
cell-cell adhesion via plasma-membrane adhesion molecules (GO:0098742)	190	12	1.2	+	9.99	4.19e-09	1.29e-06
regulation of postsynapse organization (GO:0099175)	111	7	0.7	+	9.98	7.97e-06	0.00135
G protein-coupled glutamate receptor signaling pathway (GO:0007216)	16	1	0.1	+	9.89	0.0962	1
epithelial cell fate commitment (GO:0072148)	16	1	0.1	+	9.89	0.0962	1
synapse maturation (GO:0060074)	16	1	0.1	+	9.89	0.0962	1
positive regulation of synapse assembly (GO:0051965)	80	5	0.51	+	9.89	0.000171	0.0186
positive regulation of interleukin-2 production (GO:0032743)	32	2	0.2	+	9.89	0.0178	0.475
cellular response to fluid shear stress (GO:0071498)	16	1	0.1	+	9.89	0.0962	1
ganglioside biosynthetic process (GO:0001574)	16	1	0.1	+	9.89	0.0962	1
calcium ion import (GO:0070509)	48	3	0.3	+	9.89	0.00365	0.171
regulation of adenylate cyclase-activating G protein-coupled receptor signaling pathway (GO:0106070)	16	1	0.1	+	9.89	0.0962	1
engulfment of apoptotic cell (GO:0043652)	16	1	0.1	+	9.89	0.0962	1
regulation of respiratory system process (GO:0044065)	16	1	0.1	+	9.89	0.0962	1
negative regulation of smooth muscle cell differentiation (GO:0051151)	16	1	0.1	+	9.89	0.0962	1
blood vessel endothelial cell migration (GO:0043534)	32	2	0.2	+	9.89	0.0178	0.474
ephrin receptor signaling pathway (GO:0048013)	32	2	0.2	+	9.89	0.0178	0.474
negative regulation of axon extension (GO:0030517)	48	3	0.3	+	9.89	0.00365	0.17
regulation of macrophage cytokine production (GO:0010935)	16	1	0.1	+	9.89	0.0962	1
regulation of T cell chemotaxis (GO:0010819)	16	1	0.1	+	9.89	0.0962	1
regulation of dendrite extension (GO:1903859)	32	2	0.2	+	9.89	0.0178	0.473
ionotropic glutamate receptor signaling pathway (GO:0035235)	16	1	0.1	+	9.89	0.0962	1
fibroblast migration (GO:0010761)	16	1	0.1	+	9.89	0.0962	1
vasculogenesis involved in coronary vascular morphogenesis (GO:0060979)	16	1	0.1	+	9.89	0.0962	1
heart formation (GO:0060914)	16	1	0.1	+	9.89	0.0962	1
ruffle assembly (GO:0097178)	16	1	0.1	+	9.89	0.0962	1
mesenchymal cell proliferation (GO:0010463)	16	1	0.1	+	9.89	0.0962	1
mammary gland epithelial cell differentiation (GO:0060644)	16	1	0.1	+	9.89	0.0962	1
regulation of skeletal muscle adaptation (GO:0014733)	16	1	0.1	+	9.89	0.0962	1
negative regulation of dendritic spine development (GO:0061000)	16	1	0.1	+	9.89	0.0962	1
heterophilic cell-cell adhesion via plasma membrane cell adhesion molecules (GO:0007157)	49	3	0.31	+	9.68	0.00387	0.178
regulation of cardiac muscle cell proliferation (GO:0060043)	49	3	0.31	+	9.68	0.00387	0.178
neuroblast proliferation (GO:0007405)	33	2	0.21	+	9.59	0.0189	0.468
regulation of smooth muscle cell differentiation (GO:0051150)	33	2	0.21	+	9.59	0.0189	0.467
semi-lunar valve development (GO:1905314)	33	2	0.21	+	9.59	0.0189	0.466
positive regulation of microtubule polymerization or depolymerization (GO:0031112)	33	2	0.21	+	9.59	0.0189	0.465
cardiac muscle cell action potential involved in contraction (GO:0086002)	33	2	0.21	+	9.59	0.0189	0.465
lactation (GO:0007595)	33	2	0.21	+	9.59	0.0189	0.464
central nervous system neuron development (GO:0021954)	100	6	0.63	+	9.49	4.74e-05	0.00643
regulation of cardiac muscle contraction (GO:0055117)	67	4	0.42	+	9.44	0.000926	0.0681
axonogenesis (GO:0007409)	352	21	2.23	+	9.44	1.28e-14	1.84e-11
positive regulation of cell size (GO:0045793)	17	1	0.11	+	9.31	0.102	1
neurotransmitter secretion (GO:0007269)	85	5	0.54	+	9.31	0.000226	0.0222
locomotor rhythm (GO:0045475)	17	1	0.11	+	9.31	0.102	1
prepulse inhibition (GO:0060134)	17	1	0.11	+	9.31	0.102	1
cardiac muscle cell proliferation (GO:0060038)	17	1	0.11	+	9.31	0.102	1
signal release from synapse (GO:0099643)	85	5	0.54	+	9.31	0.000226	0.0221
positive regulation of phosphoprotein phosphatase activity (GO:0032516)	17	1	0.11	+	9.31	0.102	1
forebrain morphogenesis (GO:0048853)	17	1	0.11	+	9.31	0.102	1
regulation of cell-cell adhesion mediated by cadherin (GO:2000047)	17	1	0.11	+	9.31	0.102	1
regulation of relaxation of muscle (GO:1901077)	17	1	0.11	+	9.31	0.102	1
regulation of thymocyte apoptotic process (GO:0070243)	17	1	0.11	+	9.31	0.102	1
regulation of long-term synaptic depression (GO:1900452)	17	1	0.11	+	9.31	0.102	1
maternal behavior (GO:0042711)	17	1	0.11	+	9.31	0.102	1
axon regeneration (GO:0031103)	17	1	0.11	+	9.31	0.102	1
motor behavior (GO:0061744)	17	1	0.11	+	9.31	0.102	1
bicarbonate transport (GO:0015701)	17	1	0.11	+	9.31	0.102	1
protein O-linked mannosylation (GO:0035269)	17	1	0.11	+	9.31	0.102	1
asymmetric cell division (GO:0008356)	17	1	0.11	+	9.31	0.102	1
cardiac muscle hypertrophy in response to stress (GO:0014898)	17	1	0.11	+	9.31	0.102	1
cell migration involved in gastrulation (GO:0042074)	17	1	0.11	+	9.31	0.102	1
cardiac muscle adaptation (GO:0014887)	17	1	0.11	+	9.31	0.102	1
muscle hypertrophy in response to stress (GO:0003299)	17	1	0.11	+	9.31	0.102	1
craniofacial suture morphogenesis (GO:0097094)	17	1	0.11	+	9.31	0.102	1
regulation of Golgi organization (GO:1903358)	17	1	0.11	+	9.31	0.102	1
negative regulation of axonogenesis (GO:0050771)	69	4	0.44	+	9.17	0.00103	0.0731
positive regulation of protein localization to cell periphery (GO:1904377)	69	4	0.44	+	9.17	0.00103	0.0728
axon development (GO:0061564)	383	22	2.42	+	9.09	6.08e-15	1.06e-11
response to zinc ion (GO:0010043)	35	2	0.22	+	9.04	0.021	0.511
negative regulation of microtubule depolymerization (GO:0007026)	35	2	0.22	+	9.04	0.021	0.51
gastrulation with mouth forming second (GO:0001702)	35	2	0.22	+	9.04	0.021	0.51
cellular response to cAMP (GO:0071320)	35	2	0.22	+	9.04	0.021	0.509
embryonic pattern specification (GO:0009880)	70	4	0.44	+	9.04	0.00109	0.0757
cardiac muscle tissue growth (GO:0055017)	35	2	0.22	+	9.04	0.021	0.508
cardiac conduction (GO:0061337)	53	3	0.34	+	8.95	0.00481	0.207
negative regulation of endothelial cell migration (GO:0010596)	53	3	0.34	+	8.95	0.00481	0.206
preganglionic parasympathetic fiber development (GO:0021783)	18	1	0.11	+	8.79	0.108	1
striatum development (GO:0021756)	18	1	0.11	+	8.79	0.108	1
regulation of podosome assembly (GO:0071801)	18	1	0.11	+	8.79	0.108	1
regulation of CD8-positive, alpha-beta T cell activation (GO:2001185)	18	1	0.11	+	8.79	0.108	1
metanephric tubule development (GO:0072170)	18	1	0.11	+	8.79	0.108	1
neutrophil homeostasis (GO:0001780)	18	1	0.11	+	8.79	0.108	1
negative regulation of cardiac muscle cell proliferation (GO:0060044)	18	1	0.11	+	8.79	0.108	1
establishment of epithelial cell apical/basal polarity (GO:0045198)	18	1	0.11	+	8.79	0.108	1
positive regulation of lymphocyte chemotaxis (GO:0140131)	18	1	0.11	+	8.79	0.108	1
axon extension (GO:0048675)	36	2	0.23	+	8.79	0.0222	0.53
positive regulation of synaptic transmission, GABAergic (GO:0032230)	18	1	0.11	+	8.79	0.108	1
postsynapse assembly (GO:0099068)	18	1	0.11	+	8.79	0.108	1
regulation of modification of synaptic structure (GO:1905244)	18	1	0.11	+	8.79	0.108	1
inactivation of MAPK activity (GO:0000188)	18	1	0.11	+	8.79	0.108	1
positive regulation of cyclase activity (GO:0031281)	18	1	0.11	+	8.79	0.108	1
regulation of transcription involved in G1/S transition of mitotic cell cycle (GO:0000083)	18	1	0.11	+	8.79	0.108	1
surfactant homeostasis (GO:0043129)	18	1	0.11	+	8.79	0.108	1
regulation of cell fate specification (GO:0042659)	18	1	0.11	+	8.79	0.108	1
female genitalia development (GO:0030540)	18	1	0.11	+	8.79	0.108	1
negative regulation of cytokine production involved in inflammatory response (GO:1900016)	18	1	0.11	+	8.79	0.108	1
membrane repolarization (GO:0086009)	18	1	0.11	+	8.79	0.108	1
parental behavior (GO:0060746)	18	1	0.11	+	8.79	0.108	1
regulation of gastrulation (GO:0010470)	18	1	0.11	+	8.79	0.108	1
vascular associated smooth muscle contraction (GO:0014829)	18	1	0.11	+	8.79	0.108	1
negative regulation of leukocyte chemotaxis (GO:0002689)	18	1	0.11	+	8.79	0.108	1
regulation of dendrite morphogenesis (GO:0048814)	91	5	0.58	+	8.69	0.000308	0.0285
cardiac muscle hypertrophy (GO:0003300)	37	2	0.23	+	8.55	0.0233	0.554
regulation of synapse organization (GO:0050807)	260	14	1.64	+	8.52	1.54e-09	5.76e-07
biological process involved in intraspecies interaction between organisms (GO:0051703)	56	3	0.35	+	8.47	0.00559	0.234
social behavior (GO:0035176)	56	3	0.35	+	8.47	0.00559	0.234
heart growth (GO:0060419)	38	2	0.24	+	8.33	0.0245	0.58
positive regulation of catecholamine secretion (GO:0033605)	19	1	0.12	+	8.33	0.113	1
blastoderm segmentation (GO:0007350)	19	1	0.12	+	8.33	0.113	1
regulation of mammary gland epithelial cell proliferation (GO:0033599)	19	1	0.12	+	8.33	0.113	1
regulation of growth hormone secretion (GO:0060123)	19	1	0.12	+	8.33	0.113	1
negative regulation of mononuclear cell migration (GO:0071676)	19	1	0.12	+	8.33	0.113	1
semaphorin-plexin signaling pathway (GO:0071526)	38	2	0.24	+	8.33	0.0245	0.579
hematopoietic stem cell proliferation (GO:0071425)	19	1	0.12	+	8.33	0.113	1
fatty acid derivative biosynthetic process (GO:1901570)	19	1	0.12	+	8.33	0.113	1
negative regulation of fibroblast growth factor receptor signaling pathway (GO:0040037)	19	1	0.12	+	8.33	0.113	1
positive regulation of protein localization to cell surface (GO:2000010)	19	1	0.12	+	8.33	0.113	1
neurotransmitter receptor transport to postsynaptic membrane (GO:0098969)	19	1	0.12	+	8.33	0.113	1
positive regulation of lyase activity (GO:0051349)	19	1	0.12	+	8.33	0.113	1
inositol phosphate-mediated signaling (GO:0048016)	19	1	0.12	+	8.33	0.113	1
regulation of microtubule depolymerization (GO:0031114)	38	2	0.24	+	8.33	0.0245	0.578
cardiac muscle cell contraction (GO:0086003)	38	2	0.24	+	8.33	0.0245	0.577
cardiac muscle cell action potential (GO:0086001)	38	2	0.24	+	8.33	0.0245	0.577
regulation of release of sequestered calcium ion into cytosol by sarcoplasmic reticulum (GO:0010880)	19	1	0.12	+	8.33	0.113	1
synaptic vesicle exocytosis (GO:0016079)	57	3	0.36	+	8.33	0.00587	0.244
negative regulation of sodium ion transport (GO:0010766)	19	1	0.12	+	8.33	0.113	1
dendritic spine development (GO:0060996)	38	2	0.24	+	8.33	0.0245	0.576
negative regulation of gene silencing by miRNA (GO:0060965)	19	1	0.12	+	8.33	0.113	1
trophoblast giant cell differentiation (GO:0060707)	19	1	0.12	+	8.33	0.113	1
striated muscle cell proliferation (GO:0014855)	19	1	0.12	+	8.33	0.113	1
positive regulation of calcium ion-dependent exocytosis (GO:0045956)	19	1	0.12	+	8.33	0.113	1
cell junction maintenance (GO:0034331)	38	2	0.24	+	8.33	0.0245	0.575
positive regulation of meiotic nuclear division (GO:0045836)	19	1	0.12	+	8.33	0.113	1
synapse organization (GO:0050808)	305	16	1.93	+	8.30	1.42e-10	9.31e-08
sprouting angiogenesis (GO:0002040)	58	3	0.37	+	8.18	0.00616	0.253
regulation of synapse structure or activity (GO:0050803)	272	14	1.72	+	8.14	2.71e-09	8.89e-07
neuron projection morphogenesis (GO:0048812)	486	25	3.07	+	8.14	8.64e-16	3.4e-12
glutamate receptor signaling pathway (GO:0007215)	39	2	0.25	+	8.11	0.0257	0.566
positive regulation of cardiac muscle hypertrophy (GO:0010613)	39	2	0.25	+	8.11	0.0257	0.565
striated muscle hypertrophy (GO:0014897)	39	2	0.25	+	8.11	0.0257	0.564
plasma membrane bounded cell projection morphogenesis (GO:0120039)	491	25	3.1	+	8.05	1.09e-15	2.86e-12
regulation of interleukin-2 production (GO:0032663)	59	3	0.37	+	8.04	0.00645	0.24
regulation of action potential (GO:0098900)	59	3	0.37	+	8.04	0.00645	0.24
cardiac septum morphogenesis (GO:0060411)	79	4	0.5	+	8.01	0.00169	0.104
regulation of synaptic transmission, glutamatergic (GO:0051966)	79	4	0.5	+	8.01	0.00169	0.103
protein localization to synapse (GO:0035418)	79	4	0.5	+	8.01	0.00169	0.103
ventricular septum development (GO:0003281)	79	4	0.5	+	8.01	0.00169	0.103
cell projection morphogenesis (GO:0048858)	497	25	3.14	+	7.96	1.43e-15	3.22e-12
positive regulation of cell junction assembly (GO:1901890)	120	6	0.76	+	7.91	0.000128	0.0152
actin-mediated cell contraction (GO:0070252)	60	3	0.38	+	7.91	0.00675	0.248
calcium ion transmembrane import into cytosol (GO:0097553)	60	3	0.38	+	7.91	0.00675	0.247
branching involved in salivary gland morphogenesis (GO:0060445)	20	1	0.13	+	7.91	0.119	1
regulation of macrophage differentiation (GO:0045649)	20	1	0.13	+	7.91	0.119	1
positive regulation of neurotransmitter secretion (GO:0001956)	20	1	0.13	+	7.91	0.119	1
endothelial cell proliferation (GO:0001935)	20	1	0.13	+	7.91	0.119	1
metanephric epithelium development (GO:0072207)	20	1	0.13	+	7.91	0.119	1
vocalization behavior (GO:0071625)	20	1	0.13	+	7.91	0.119	1
synaptic transmission, GABAergic (GO:0051932)	20	1	0.13	+	7.91	0.119	1
peptidyl-tyrosine autophosphorylation (GO:0038083)	20	1	0.13	+	7.91	0.119	1
glandular epithelial cell development (GO:0002068)	20	1	0.13	+	7.91	0.119	1
neurotransmitter receptor localization to postsynaptic specialization membrane (GO:0099645)	20	1	0.13	+	7.91	0.119	1
protein localization to postsynaptic specialization membrane (GO:0099633)	20	1	0.13	+	7.91	0.119	1
positive regulation of amyloid-beta formation (GO:1902004)	20	1	0.13	+	7.91	0.119	1
chemical homeostasis within a tissue (GO:0048875)	20	1	0.13	+	7.91	0.119	1
regulation of establishment of cell polarity (GO:2000114)	20	1	0.13	+	7.91	0.119	1
neurotransmitter reuptake (GO:0098810)	20	1	0.13	+	7.91	0.119	1
embryonic digestive tract morphogenesis (GO:0048557)	20	1	0.13	+	7.91	0.119	1
regulation of lipopolysaccharide-mediated signaling pathway (GO:0031664)	20	1	0.13	+	7.91	0.119	1
megakaryocyte development (GO:0035855)	20	1	0.13	+	7.91	0.119	1
plasma membrane phospholipid scrambling (GO:0017121)	20	1	0.13	+	7.91	0.119	1
behavioral response to cocaine (GO:0048148)	20	1	0.13	+	7.91	0.119	1
calcium-mediated signaling using intracellular calcium source (GO:0035584)	20	1	0.13	+	7.91	0.119	1
negative regulation of vascular permeability (GO:0043116)	20	1	0.13	+	7.91	0.119	1
regulation of receptor clustering (GO:1903909)	20	1	0.13	+	7.91	0.119	1
positive regulation of fibroblast migration (GO:0010763)	20	1	0.13	+	7.91	0.119	1
establishment of protein localization to postsynaptic membrane (GO:1903540)	20	1	0.13	+	7.91	0.119	1
endocardial cushion formation (GO:0003272)	20	1	0.13	+	7.91	0.119	1
learning (GO:0007612)	180	9	1.14	+	7.91	2.6e-06	0.000512
positive regulation of muscle hypertrophy (GO:0014742)	40	2	0.25	+	7.91	0.0269	0.582
positive regulation of myeloid leukocyte cytokine production involved in immune response (GO:0061081)	20	1	0.13	+	7.91	0.119	1
regulation of synapse assembly (GO:0051963)	121	6	0.76	+	7.84	0.000134	0.0155
cell morphogenesis involved in neuron differentiation (GO:0048667)	448	22	2.83	+	7.77	1.37e-13	1.66e-10
metal ion export (GO:0070839)	41	2	0.26	+	7.72	0.0282	0.599
animal organ formation (GO:0048645)	41	2	0.26	+	7.72	0.0282	0.599
response to cocaine (GO:0042220)	41	2	0.26	+	7.72	0.0282	0.598
muscle hypertrophy (GO:0014896)	41	2	0.26	+	7.72	0.0282	0.597
positive regulation of protein localization to plasma membrane (GO:1903078)	62	3	0.39	+	7.65	0.00738	0.264
regulation of striated muscle contraction (GO:0006942)	83	4	0.52	+	7.62	0.00202	0.116
cell part morphogenesis (GO:0032990)	522	25	3.3	+	7.58	4.3e-15	8.46e-12
cellular response to carbohydrate stimulus (GO:0071322)	63	3	0.4	+	7.53	0.00771	0.271
acrosome reaction (GO:0007340)	21	1	0.13	+	7.53	0.124	1
positive regulation of neuron migration (GO:2001224)	21	1	0.13	+	7.53	0.124	1
dorsal spinal cord development (GO:0021516)	21	1	0.13	+	7.53	0.124	1
activation of adenylate cyclase activity (GO:0007190)	21	1	0.13	+	7.53	0.124	1
negative regulation of posttranscriptional gene silencing (GO:0060149)	21	1	0.13	+	7.53	0.124	1
phosphatidic acid biosynthetic process (GO:0006654)	21	1	0.13	+	7.53	0.124	1
cell-cell junction maintenance (GO:0045217)	21	1	0.13	+	7.53	0.124	1
cartilage condensation (GO:0001502)	21	1	0.13	+	7.53	0.124	1
regulation of synaptic vesicle exocytosis (GO:2000300)	84	4	0.53	+	7.53	0.00211	0.119
regulation of hair follicle development (GO:0051797)	21	1	0.13	+	7.53	0.124	1
inorganic ion import across plasma membrane (GO:0099587)	84	4	0.53	+	7.53	0.00211	0.119
negative regulation of cytosolic calcium ion concentration (GO:0051481)	21	1	0.13	+	7.53	0.124	1
positive chemotaxis (GO:0050918)	21	1	0.13	+	7.53	0.124	1
neurotransmitter receptor transport to plasma membrane (GO:0098877)	21	1	0.13	+	7.53	0.124	1
relaxation of muscle (GO:0090075)	21	1	0.13	+	7.53	0.124	1
regulation of protein kinase C signaling (GO:0090036)	21	1	0.13	+	7.53	0.124	1
anatomical structure arrangement (GO:0048532)	21	1	0.13	+	7.53	0.124	1
regulation of vascular endothelial growth factor signaling pathway (GO:1900746)	21	1	0.13	+	7.53	0.124	1
parasympathetic nervous system development (GO:0048486)	21	1	0.13	+	7.53	0.124	1
response to muscle stretch (GO:0035994)	21	1	0.13	+	7.53	0.124	1
inorganic cation import across plasma membrane (GO:0098659)	84	4	0.53	+	7.53	0.00211	0.118
positive regulation of lymphocyte apoptotic process (GO:0070230)	21	1	0.13	+	7.53	0.124	1
chondroitin sulfate proteoglycan biosynthetic process (GO:0050650)	21	1	0.13	+	7.53	0.124	1
neuron maturation (GO:0042551)	42	2	0.27	+	7.53	0.0294	0.621
filopodium assembly (GO:0046847)	21	1	0.13	+	7.53	0.124	1
muscle cell cellular homeostasis (GO:0046716)	21	1	0.13	+	7.53	0.124	1
negative regulation of gene silencing by RNA (GO:0060967)	21	1	0.13	+	7.53	0.124	1
cell surface receptor signaling pathway involved in heart development (GO:0061311)	21	1	0.13	+	7.53	0.124	1
negative regulation of glucose import (GO:0046325)	21	1	0.13	+	7.53	0.124	1
positive regulation of glycolytic process (GO:0045821)	21	1	0.13	+	7.53	0.124	1
neurotransmitter transport (GO:0006836)	129	6	0.82	+	7.36	0.000188	0.0195
regulation of extent of cell growth (GO:0061387)	129	6	0.82	+	7.36	0.000188	0.0194
positive regulation of cardiac muscle tissue growth (GO:0055023)	43	2	0.27	+	7.36	0.0307	0.643
epithelial to mesenchymal transition (GO:0001837)	65	3	0.41	+	7.30	0.00839	0.288
homophilic cell adhesion via plasma membrane adhesion molecules (GO:0007156)	109	5	0.69	+	7.26	0.000694	0.0544
definitive hemopoiesis (GO:0060216)	22	1	0.14	+	7.19	0.13	1
establishment or maintenance of epithelial cell apical/basal polarity (GO:0045197)	44	2	0.28	+	7.19	0.0321	0.63
positive regulation of endothelial cell apoptotic process (GO:2000353)	22	1	0.14	+	7.19	0.13	1
regulation of lymphocyte chemotaxis (GO:1901623)	22	1	0.14	+	7.19	0.13	1
cell aggregation (GO:0098743)	22	1	0.14	+	7.19	0.13	1
cytoplasmic sequestering of protein (GO:0051220)	22	1	0.14	+	7.19	0.13	1
positive regulation of myelination (GO:0031643)	22	1	0.14	+	7.19	0.13	1
postsynaptic modulation of chemical synaptic transmission (GO:0099170)	22	1	0.14	+	7.19	0.13	1
membrane raft organization (GO:0031579)	22	1	0.14	+	7.19	0.13	1
paraxial mesoderm development (GO:0048339)	22	1	0.14	+	7.19	0.13	1
polarized epithelial cell differentiation (GO:0030859)	22	1	0.14	+	7.19	0.13	1
protein mannosylation (GO:0035268)	22	1	0.14	+	7.19	0.13	1
dendritic spine morphogenesis (GO:0060997)	22	1	0.14	+	7.19	0.13	1
mammary gland lobule development (GO:0061377)	22	1	0.14	+	7.19	0.13	1
positive regulation of sprouting angiogenesis (GO:1903672)	22	1	0.14	+	7.19	0.13	1
establishment of apical/basal cell polarity (GO:0035089)	22	1	0.14	+	7.19	0.13	1
protein localization to postsynaptic membrane (GO:1903539)	44	2	0.28	+	7.19	0.0321	0.629
mammary gland alveolus development (GO:0060749)	22	1	0.14	+	7.19	0.13	1
type B pancreatic cell differentiation (GO:0003309)	22	1	0.14	+	7.19	0.13	1
regulation of Arp2/3 complex-mediated actin nucleation (GO:0034315)	22	1	0.14	+	7.19	0.13	1
morphogenesis of an epithelial fold (GO:0060571)	22	1	0.14	+	7.19	0.13	1
sodium ion transmembrane transport (GO:0035725)	89	4	0.56	+	7.11	0.00259	0.141
calcium ion transport into cytosol (GO:0060402)	67	3	0.42	+	7.08	0.00911	0.308
negative regulation of endothelial cell proliferation (GO:0001937)	45	2	0.28	+	7.03	0.0334	0.651
brain morphogenesis (GO:0048854)	45	2	0.28	+	7.03	0.0334	0.65
G2/M transition of mitotic cell cycle (GO:0000086)	45	2	0.28	+	7.03	0.0334	0.649
fibroblast growth factor receptor signaling pathway (GO:0008543)	45	2	0.28	+	7.03	0.0334	0.648
insulin secretion (GO:0030073)	45	2	0.28	+	7.03	0.0334	0.647
regulation of neuronal synaptic plasticity (GO:0048168)	68	3	0.43	+	6.98	0.00948	0.318
cell junction assembly (GO:0034329)	250	11	1.58	+	6.96	6.75e-07	0.00015
ureteric bud development (GO:0001657)	91	4	0.58	+	6.95	0.0028	0.145
regulation of axon extension (GO:0030516)	114	5	0.72	+	6.94	0.000847	0.0638
positive regulation of heart growth (GO:0060421)	46	2	0.29	+	6.88	0.0348	0.668
regulation of cellular response to vascular endothelial growth factor stimulus (GO:1902547)	23	1	0.15	+	6.88	0.135	1
mesonephric tubule development (GO:0072164)	92	4	0.58	+	6.88	0.00292	0.149
mesonephric epithelium development (GO:0072163)	92	4	0.58	+	6.88	0.00292	0.148
virion assembly (GO:0019068)	23	1	0.15	+	6.88	0.135	1
membrane depolarization (GO:0051899)	46	2	0.29	+	6.88	0.0348	0.667
chemical synaptic transmission, postsynaptic (GO:0099565)	46	2	0.29	+	6.88	0.0348	0.666
positive regulation of embryonic development (GO:0040019)	23	1	0.15	+	6.88	0.135	1
myelin assembly (GO:0032288)	23	1	0.15	+	6.88	0.135	1
sympathetic nervous system development (GO:0048485)	23	1	0.15	+	6.88	0.135	1
regulation of respiratory gaseous exchange (GO:0043576)	23	1	0.15	+	6.88	0.135	1
notochord development (GO:0030903)	23	1	0.15	+	6.88	0.135	1
Rac protein signal transduction (GO:0016601)	23	1	0.15	+	6.88	0.135	1
mannosylation (GO:0097502)	23	1	0.15	+	6.88	0.135	1
response to fluid shear stress (GO:0034405)	23	1	0.15	+	6.88	0.135	1
atrial septum development (GO:0003283)	23	1	0.15	+	6.88	0.135	1
chemosensory behavior (GO:0007635)	23	1	0.15	+	6.88	0.135	1
regulation of protein localization to cell periphery (GO:1904375)	139	6	0.88	+	6.83	0.00028	0.0265
regulation of axonogenesis (GO:0050770)	186	8	1.18	+	6.80	2.76e-05	0.00403
cellular component morphogenesis (GO:0032989)	610	26	3.86	+	6.74	1.68e-14	2.2e-11
regulation of sodium ion transport (GO:0002028)	94	4	0.59	+	6.73	0.00315	0.156
postsynaptic signal transduction (GO:0098926)	47	2	0.3	+	6.73	0.0361	0.69
bone mineralization (GO:0030282)	47	2	0.3	+	6.73	0.0361	0.689
endocardial cushion development (GO:0003197)	47	2	0.3	+	6.73	0.0361	0.688
negative regulation of synaptic transmission (GO:0050805)	71	3	0.45	+	6.68	0.0106	0.349
mesonephros development (GO:0001823)	95	4	0.6	+	6.66	0.00327	0.156
central nervous system neuron differentiation (GO:0021953)	214	9	1.35	+	6.65	1.03e-05	0.00169
cardiac epithelial to mesenchymal transition (GO:0060317)	24	1	0.15	+	6.59	0.141	1
cellular sodium ion homeostasis (GO:0006883)	24	1	0.15	+	6.59	0.141	1
central nervous system myelination (GO:0022010)	24	1	0.15	+	6.59	0.141	1
subpallium development (GO:0021544)	24	1	0.15	+	6.59	0.141	1
cyclic purine nucleotide metabolic process (GO:0052652)	24	1	0.15	+	6.59	0.141	1
mesenchyme morphogenesis (GO:0072132)	48	2	0.3	+	6.59	0.0375	0.678
glandular epithelial cell differentiation (GO:0002067)	48	2	0.3	+	6.59	0.0375	0.677
regulation of platelet aggregation (GO:0090330)	24	1	0.15	+	6.59	0.141	1
regulation of collateral sprouting (GO:0048670)	24	1	0.15	+	6.59	0.141	1
cochlea development (GO:0090102)	48	2	0.3	+	6.59	0.0375	0.676
axon ensheathment in central nervous system (GO:0032291)	24	1	0.15	+	6.59	0.141	1
activation of protein kinase B activity (GO:0032148)	24	1	0.15	+	6.59	0.141	1
protein heterooligomerization (GO:0051291)	24	1	0.15	+	6.59	0.141	1
negative regulation of vascular associated smooth muscle cell proliferation (GO:1904706)	24	1	0.15	+	6.59	0.141	1
negative regulation of microtubule polymerization or depolymerization (GO:0031111)	48	2	0.3	+	6.59	0.0375	0.675
cyclic nucleotide biosynthetic process (GO:0009190)	24	1	0.15	+	6.59	0.141	1
middle ear morphogenesis (GO:0042474)	24	1	0.15	+	6.59	0.141	1
retina layer formation (GO:0010842)	24	1	0.15	+	6.59	0.141	1
exocrine system development (GO:0035272)	48	2	0.3	+	6.59	0.0375	0.675
negative regulation of epithelial cell migration (GO:0010633)	72	3	0.46	+	6.59	0.011	0.361
establishment of monopolar cell polarity (GO:0061162)	24	1	0.15	+	6.59	0.141	1
heart valve morphogenesis (GO:0003179)	48	2	0.3	+	6.59	0.0375	0.674
epithelial cell proliferation (GO:0050673)	97	4	0.61	+	6.52	0.00352	0.165
neuron migration (GO:0001764)	147	6	0.93	+	6.46	0.000376	0.0336
cell cycle G2/M phase transition (GO:0044839)	49	2	0.31	+	6.46	0.039	0.691
negative regulation of epithelial cell proliferation (GO:0050680)	147	6	0.93	+	6.46	0.000376	0.0334
cardiac cell development (GO:0055006)	74	3	0.47	+	6.41	0.0119	0.379
Wnt signaling pathway, planar cell polarity pathway (GO:0060071)	25	1	0.16	+	6.33	0.146	1
regulation of establishment or maintenance of cell polarity (GO:0032878)	25	1	0.16	+	6.33	0.146	1
neurotrophin signaling pathway (GO:0038179)	25	1	0.16	+	6.33	0.146	1
cardiac muscle contraction (GO:0060048)	75	3	0.47	+	6.33	0.0123	0.389
negative regulation of protein depolymerization (GO:1901880)	75	3	0.47	+	6.33	0.0123	0.389
neurotransmitter uptake (GO:0001504)	25	1	0.16	+	6.33	0.146	1
export across plasma membrane (GO:0140115)	50	2	0.32	+	6.33	0.0404	0.714
positive regulation of neurotransmitter transport (GO:0051590)	25	1	0.16	+	6.33	0.146	1
positive regulation of multi-organism process (GO:0043902)	25	1	0.16	+	6.33	0.146	1
smooth muscle tissue development (GO:0048745)	25	1	0.16	+	6.33	0.146	1
regulation of non-canonical Wnt signaling pathway (GO:2000050)	25	1	0.16	+	6.33	0.146	1
post-anal tail morphogenesis (GO:0036342)	25	1	0.16	+	6.33	0.146	1
enteroendocrine cell differentiation (GO:0035883)	25	1	0.16	+	6.33	0.146	1
epithelial cell differentiation involved in kidney development (GO:0035850)	25	1	0.16	+	6.33	0.146	1
behavioral response to pain (GO:0048266)	25	1	0.16	+	6.33	0.146	1
neuron projection regeneration (GO:0031102)	25	1	0.16	+	6.33	0.146	1
protein localization to postsynapse (GO:0062237)	50	2	0.32	+	6.33	0.0404	0.713
membrane depolarization during action potential (GO:0086010)	25	1	0.16	+	6.33	0.146	1
regulation of production of miRNAs involved in gene silencing by miRNA (GO:1903798)	25	1	0.16	+	6.33	0.146	1
megakaryocyte differentiation (GO:0030219)	25	1	0.16	+	6.33	0.146	1
establishment or maintenance of monopolar cell polarity (GO:0061339)	25	1	0.16	+	6.33	0.146	1
phosphatidic acid metabolic process (GO:0046473)	25	1	0.16	+	6.33	0.146	1
diacylglycerol metabolic process (GO:0046339)	25	1	0.16	+	6.33	0.146	1
neuromuscular junction development (GO:0007528)	50	2	0.32	+	6.33	0.0404	0.712
cell morphogenesis involved in differentiation (GO:0000904)	577	23	3.65	+	6.31	2.5e-12	2.62e-09
mammary gland development (GO:0030879)	151	6	0.95	+	6.29	0.000432	0.0372
skeletal muscle organ development (GO:0060538)	151	6	0.95	+	6.29	0.000432	0.037
roof of mouth development (GO:0060021)	101	4	0.64	+	6.26	0.00405	0.185
muscle organ development (GO:0007517)	278	11	1.76	+	6.26	1.87e-06	0.000392
signal release (GO:0023061)	177	7	1.12	+	6.26	0.000148	0.0168
negative regulation of developmental growth (GO:0048640)	127	5	0.8	+	6.23	0.00136	0.0905
negative regulation of locomotion (GO:0040013)	331	13	2.09	+	6.21	2.27e-07	5.5e-05
positive regulation of axonogenesis (GO:0050772)	102	4	0.64	+	6.20	0.0042	0.188
synaptic vesicle localization (GO:0097479)	51	2	0.32	+	6.20	0.0419	0.732
cell-cell adhesion (GO:0098609)	409	16	2.59	+	6.19	8.93e-09	2.65e-06
regulation of cardiac muscle tissue growth (GO:0055021)	77	3	0.49	+	6.16	0.0132	0.378
negative regulation of cell migration (GO:0030336)	283	11	1.79	+	6.15	2.21e-06	0.000447
negative regulation of cyclin-dependent protein serine/threonine kinase activity (GO:0045736)	26	1	0.16	+	6.08	0.152	1
positive regulation of systemic arterial blood pressure (GO:0003084)	26	1	0.16	+	6.08	0.152	1
regulation of type I interferon-mediated signaling pathway (GO:0060338)	26	1	0.16	+	6.08	0.152	1
telencephalon glial cell migration (GO:0022030)	26	1	0.16	+	6.08	0.152	1
neuromuscular synaptic transmission (GO:0007274)	26	1	0.16	+	6.08	0.152	1
protein kinase C-activating G protein-coupled receptor signaling pathway (GO:0007205)	26	1	0.16	+	6.08	0.152	1
chloride transmembrane transport (GO:1902476)	52	2	0.33	+	6.08	0.0433	0.731
glycosphingolipid biosynthetic process (GO:0006688)	26	1	0.16	+	6.08	0.152	1
regulation of activin receptor signaling pathway (GO:0032925)	26	1	0.16	+	6.08	0.152	1
stem cell proliferation (GO:0072089)	26	1	0.16	+	6.08	0.152	1
uterus development (GO:0060065)	26	1	0.16	+	6.08	0.152	1
reflex (GO:0060004)	26	1	0.16	+	6.08	0.152	1
positive regulation of amine transport (GO:0051954)	52	2	0.33	+	6.08	0.0433	0.73
negative regulation of interleukin-2 production (GO:0032703)	26	1	0.16	+	6.08	0.152	1
ganglioside metabolic process (GO:0001573)	26	1	0.16	+	6.08	0.152	1
regulation of production of small RNA involved in gene silencing by RNA (GO:0070920)	26	1	0.16	+	6.08	0.152	1
cellular response to interleukin-6 (GO:0071354)	26	1	0.16	+	6.08	0.152	1
cellular response to glucose stimulus (GO:0071333)	52	2	0.33	+	6.08	0.0433	0.729
positive regulation of positive chemotaxis (GO:0050927)	26	1	0.16	+	6.08	0.152	1
bone cell development (GO:0098751)	26	1	0.16	+	6.08	0.152	1
positive regulation of nervous system process (GO:0031646)	52	2	0.33	+	6.08	0.0433	0.728
lens fiber cell differentiation (GO:0070306)	26	1	0.16	+	6.08	0.152	1
negative regulation of receptor signaling pathway via STAT (GO:1904893)	26	1	0.16	+	6.08	0.152	1
neuron cellular homeostasis (GO:0070050)	26	1	0.16	+	6.08	0.152	1
histone phosphorylation (GO:0016572)	26	1	0.16	+	6.08	0.152	1
regulation of chromatin binding (GO:0035561)	26	1	0.16	+	6.08	0.152	1
regulation of neuron projection development (GO:0010975)	546	21	3.45	+	6.08	4.72e-11	3.38e-08
negative regulation of glucose transmembrane transport (GO:0010829)	26	1	0.16	+	6.08	0.152	1
adrenal gland development (GO:0030325)	26	1	0.16	+	6.08	0.152	1
hematopoietic stem cell homeostasis (GO:0061484)	26	1	0.16	+	6.08	0.152	1
tissue regeneration (GO:0042246)	52	2	0.33	+	6.08	0.0433	0.728
establishment or maintenance of apical/basal cell polarity (GO:0035088)	52	2	0.33	+	6.08	0.0433	0.727
establishment or maintenance of bipolar cell polarity (GO:0061245)	52	2	0.33	+	6.08	0.0433	0.726
muscle cell migration (GO:0014812)	26	1	0.16	+	6.08	0.152	1
positive regulation of amyloid precursor protein catabolic process (GO:1902993)	26	1	0.16	+	6.08	0.152	1
regulation of heart contraction (GO:0008016)	182	7	1.15	+	6.08	0.000175	0.0188
cerebral cortex radial glia guided migration (GO:0021801)	26	1	0.16	+	6.08	0.152	1
outflow tract morphogenesis (GO:0003151)	78	3	0.49	+	6.08	0.0137	0.388
regulation of dendrite development (GO:0050773)	131	5	0.83	+	6.04	0.00156	0.0982
response to alkaloid (GO:0043279)	79	3	0.5	+	6.01	0.0141	0.395
kidney epithelium development (GO:0072073)	132	5	0.83	+	5.99	0.00161	0.101
negative regulation of cytokine-mediated signaling pathway (GO:0001960)	53	2	0.34	+	5.97	0.0448	0.746
morphogenesis of a polarized epithelium (GO:0001738)	53	2	0.34	+	5.97	0.0448	0.745
regulation of microtubule polymerization (GO:0031113)	53	2	0.34	+	5.97	0.0448	0.744
negative regulation of neurogenesis (GO:0050768)	160	6	1.01	+	5.93	0.000584	0.0479
cell junction organization (GO:0034330)	509	19	3.22	+	5.90	6.98e-10	3.05e-07
developmental growth involved in morphogenesis (GO:0060560)	134	5	0.85	+	5.90	0.00172	0.104
synaptic signaling (GO:0099536)	403	15	2.55	+	5.89	5.09e-08	1.33e-05
negative regulation of cell motility (GO:2000146)	296	11	1.87	+	5.88	3.39e-06	0.000642
chemotaxis (GO:0006935)	486	18	3.07	+	5.86	2.3e-09	7.86e-07
positive regulation of bone resorption (GO:0045780)	27	1	0.17	+	5.86	0.157	1
branching involved in mammary gland duct morphogenesis (GO:0060444)	27	1	0.17	+	5.86	0.157	1
positive regulation of myoblast differentiation (GO:0045663)	27	1	0.17	+	5.86	0.157	1
lymph vessel development (GO:0001945)	27	1	0.17	+	5.86	0.157	1
regulation of cell junction assembly (GO:1901888)	216	8	1.37	+	5.86	7.81e-05	0.0102
positive regulation of focal adhesion assembly (GO:0051894)	27	1	0.17	+	5.86	0.157	1
cellular response to hexose stimulus (GO:0071331)	54	2	0.34	+	5.86	0.0464	0.764
positive regulation of oligodendrocyte differentiation (GO:0048714)	27	1	0.17	+	5.86	0.157	1
cochlea morphogenesis (GO:0090103)	27	1	0.17	+	5.86	0.157	1
regulation of positive chemotaxis (GO:0050926)	27	1	0.17	+	5.86	0.157	1
digestive tract morphogenesis (GO:0048546)	54	2	0.34	+	5.86	0.0464	0.764
regulation of response to nutrient levels (GO:0032107)	27	1	0.17	+	5.86	0.157	1
regulation of response to extracellular stimulus (GO:0032104)	27	1	0.17	+	5.86	0.157	1
ruffle organization (GO:0031529)	27	1	0.17	+	5.86	0.157	1
thyroid gland development (GO:0030878)	27	1	0.17	+	5.86	0.157	1
positive regulation of G2/M transition of mitotic cell cycle (GO:0010971)	27	1	0.17	+	5.86	0.157	1
negative regulation of smooth muscle cell migration (GO:0014912)	27	1	0.17	+	5.86	0.157	1
labyrinthine layer morphogenesis (GO:0060713)	27	1	0.17	+	5.86	0.157	1
striated muscle adaptation (GO:0014888)	27	1	0.17	+	5.86	0.157	1
positive regulation of dendritic spine morphogenesis (GO:0061003)	27	1	0.17	+	5.86	0.157	1
modulation of chemical synaptic transmission (GO:0050804)	516	19	3.26	+	5.82	8.72e-10	3.71e-07
negative regulation of neuron projection development (GO:0010977)	163	6	1.03	+	5.82	0.000643	0.052
regulation of trans-synaptic signaling (GO:0099177)	517	19	3.27	+	5.81	9e-10	3.73e-07
telencephalon development (GO:0021537)	245	9	1.55	+	5.81	2.95e-05	0.00419
protein localization to cell junction (GO:1902414)	109	4	0.69	+	5.81	0.00529	0.225
positive regulation of protein localization to membrane (GO:1905477)	109	4	0.69	+	5.81	0.00529	0.225
taxis (GO:0042330)	491	18	3.1	+	5.80	2.69e-09	9e-07
negative regulation of nervous system development (GO:0051961)	164	6	1.04	+	5.79	0.000664	0.0531
regulation of dendritic spine development (GO:0060998)	82	3	0.52	+	5.79	0.0156	0.428
neuron projection development (GO:0031175)	715	26	4.52	+	5.75	6.12e-13	6.89e-10
smooth muscle contraction (GO:0006939)	55	2	0.35	+	5.75	0.0479	0.782
regulation of sodium ion transmembrane transporter activity (GO:2000649)	55	2	0.35	+	5.75	0.0479	0.781
cellular response to monosaccharide stimulus (GO:0071326)	55	2	0.35	+	5.75	0.0479	0.78
positive regulation of dendrite morphogenesis (GO:0050775)	55	2	0.35	+	5.75	0.0479	0.779
negative regulation of BMP signaling pathway (GO:0030514)	55	2	0.35	+	5.75	0.0479	0.778
cerebral cortex development (GO:0021987)	110	4	0.7	+	5.75	0.00546	0.229
regulation of dendritic spine morphogenesis (GO:0061001)	55	2	0.35	+	5.75	0.0479	0.778
neuron development (GO:0048666)	882	32	5.58	+	5.74	8.7e-16	2.74e-12
vesicle-mediated transport in synapse (GO:0099003)	138	5	0.87	+	5.73	0.00195	0.113
negative regulation of cellular component movement (GO:0051271)	305	11	1.93	+	5.71	4.49e-06	0.000841
learning or memory (GO:0007611)	305	11	1.93	+	5.71	4.49e-06	0.000831
regulation of protein localization to membrane (GO:1905475)	195	7	1.23	+	5.68	0.000266	0.0255
apoptotic process involved in development (GO:1902742)	28	1	0.18	+	5.65	0.162	1
regulation of osteoblast proliferation (GO:0033688)	28	1	0.18	+	5.65	0.162	1
regulation of SMAD protein signal transduction (GO:0060390)	28	1	0.18	+	5.65	0.162	1
innervation (GO:0060384)	28	1	0.18	+	5.65	0.162	1
pericardium development (GO:0060039)	28	1	0.18	+	5.65	0.162	1
pharyngeal system development (GO:0060037)	28	1	0.18	+	5.65	0.162	1
lens morphogenesis in camera-type eye (GO:0002089)	28	1	0.18	+	5.65	0.162	1
cellular response to alkaloid (GO:0071312)	28	1	0.18	+	5.65	0.162	1
response to interleukin-6 (GO:0070741)	28	1	0.18	+	5.65	0.162	1
skeletal muscle fiber development (GO:0048741)	28	1	0.18	+	5.65	0.162	1
anterior/posterior axis specification (GO:0009948)	56	2	0.35	+	5.65	0.0495	0.773
regulation of monocyte chemotaxis (GO:0090025)	28	1	0.18	+	5.65	0.162	1
focal adhesion assembly (GO:0048041)	28	1	0.18	+	5.65	0.162	1
positive regulation of macrophage activation (GO:0043032)	28	1	0.18	+	5.65	0.162	1
embryonic hemopoiesis (GO:0035162)	28	1	0.18	+	5.65	0.162	1
cAMP-mediated signaling (GO:0019933)	28	1	0.18	+	5.65	0.162	1
negative regulation of cyclin-dependent protein kinase activity (GO:1904030)	28	1	0.18	+	5.65	0.162	1
substrate adhesion-dependent cell spreading (GO:0034446)	56	2	0.35	+	5.65	0.0495	0.772
actin filament polymerization (GO:0030041)	28	1	0.18	+	5.65	0.162	1
regulation of smooth muscle cell apoptotic process (GO:0034391)	28	1	0.18	+	5.65	0.162	1
body fluid secretion (GO:0007589)	56	2	0.35	+	5.65	0.0495	0.771
skeletal muscle tissue development (GO:0007519)	140	5	0.89	+	5.65	0.00208	0.118
regulation of heart growth (GO:0060420)	84	3	0.53	+	5.65	0.0166	0.451
cytosolic calcium ion transport (GO:0060401)	84	3	0.53	+	5.65	0.0166	0.45
trans-synaptic signaling (GO:0099537)	365	13	2.31	+	5.63	6.75e-07	0.000148
regulation of endothelial cell migration (GO:0010594)	169	6	1.07	+	5.62	0.000775	0.059
brain development (GO:0007420)	648	23	4.1	+	5.61	2.5e-11	2.18e-08
regulation of protein localization to plasma membrane (GO:1903076)	113	4	0.71	+	5.60	0.006	0.248
negative regulation of protein-containing complex disassembly (GO:0043242)	85	3	0.54	+	5.58	0.0171	0.46
negative regulation of fat cell differentiation (GO:0045599)	57	2	0.36	+	5.55	0.051	0.791
response to cAMP (GO:0051591)	57	2	0.36	+	5.55	0.051	0.79
multicellular organismal signaling (GO:0035637)	114	4	0.72	+	5.55	0.00618	0.253
receptor clustering (GO:0043113)	57	2	0.36	+	5.55	0.051	0.789
ceramide biosynthetic process (GO:0046513)	57	2	0.36	+	5.55	0.051	0.789
negative regulation of response to cytokine stimulus (GO:0060761)	57	2	0.36	+	5.55	0.051	0.788
positive regulation of ossification (GO:0045778)	58	2	0.37	+	5.45	0.0526	0.808
regulation of adenylate cyclase activity (GO:0045761)	29	1	0.18	+	5.45	0.168	1
phosphatidylinositol biosynthetic process (GO:0006661)	58	2	0.37	+	5.45	0.0526	0.807
response to ATP (GO:0033198)	29	1	0.18	+	5.45	0.168	1
positive regulation of protein targeting to membrane (GO:0090314)	29	1	0.18	+	5.45	0.168	1
regulation of vesicle fusion (GO:0031338)	29	1	0.18	+	5.45	0.168	1
positive regulation of long-term synaptic potentiation (GO:1900273)	29	1	0.18	+	5.45	0.168	1
positive regulation of peptidyl-threonine phosphorylation (GO:0010800)	29	1	0.18	+	5.45	0.168	1
prostate gland epithelium morphogenesis (GO:0060740)	29	1	0.18	+	5.45	0.168	1
negative regulation of heart contraction (GO:0045822)	29	1	0.18	+	5.45	0.168	1
heart valve development (GO:0003170)	58	2	0.37	+	5.45	0.0526	0.806
regulation of organ growth (GO:0046620)	117	4	0.74	+	5.41	0.00676	0.247
heart contraction (GO:0060047)	88	3	0.56	+	5.39	0.0188	0.492
peptidyl-tyrosine phosphorylation (GO:0018108)	88	3	0.56	+	5.39	0.0188	0.492
Rho protein signal transduction (GO:0007266)	59	2	0.37	+	5.36	0.0542	0.827
muscle fiber development (GO:0048747)	59	2	0.37	+	5.36	0.0542	0.826
positive regulation of organ growth (GO:0046622)	59	2	0.37	+	5.36	0.0542	0.825
response to mechanical stimulus (GO:0009612)	148	5	0.94	+	5.34	0.00264	0.141
negative regulation of cell projection organization (GO:0031345)	208	7	1.31	+	5.32	0.00039	0.0343
cell morphogenesis (GO:0000902)	746	25	4.72	+	5.30	1.03e-11	9.56e-09
positive regulation of cell cycle G2/M phase transition (GO:1902751)	30	1	0.19	+	5.27	0.173	1
cranial nerve morphogenesis (GO:0021602)	30	1	0.19	+	5.27	0.173	1
gamma-aminobutyric acid signaling pathway (GO:0007214)	30	1	0.19	+	5.27	0.173	1
nuclear migration (GO:0007097)	30	1	0.19	+	5.27	0.173	1
positive regulation of amino acid transport (GO:0051957)	30	1	0.19	+	5.27	0.173	1
positive regulation of meiotic cell cycle (GO:0051446)	30	1	0.19	+	5.27	0.173	1
skeletal muscle cell differentiation (GO:0035914)	60	2	0.38	+	5.27	0.0559	0.817
negative regulation of plasma membrane bounded cell projection assembly (GO:0120033)	30	1	0.19	+	5.27	0.173	1
negative regulation of actin filament polymerization (GO:0030837)	60	2	0.38	+	5.27	0.0559	0.816
regulation of microtubule polymerization or depolymerization (GO:0031110)	90	3	0.57	+	5.27	0.0199	0.487
Golgi to plasma membrane protein transport (GO:0043001)	30	1	0.19	+	5.27	0.173	1
positive regulation of phosphatase activity (GO:0010922)	30	1	0.19	+	5.27	0.173	1
mating behavior (GO:0007617)	30	1	0.19	+	5.27	0.173	1
excretion (GO:0007588)	30	1	0.19	+	5.27	0.173	1
prostate gland morphogenesis (GO:0060512)	30	1	0.19	+	5.27	0.173	1
regulation of cell size (GO:0008361)	211	7	1.33	+	5.25	0.000424	0.0367
gland morphogenesis (GO:0022612)	121	4	0.76	+	5.23	0.00759	0.27
cardiac septum development (GO:0003279)	121	4	0.76	+	5.23	0.00759	0.269
peptidyl-tyrosine modification (GO:0018212)	91	3	0.58	+	5.21	0.0205	0.499
regulated exocytosis (GO:0045055)	122	4	0.77	+	5.19	0.0078	0.273
cellular component maintenance (GO:0043954)	61	2	0.39	+	5.19	0.0575	0.835
head development (GO:0060322)	703	23	4.44	+	5.18	1.22e-10	8.37e-08
regulation of microtubule cytoskeleton organization (GO:0070507)	153	5	0.97	+	5.17	0.00304	0.153
action potential (GO:0001508)	92	3	0.58	+	5.16	0.0211	0.508
actin filament-based movement (GO:0030048)	92	3	0.58	+	5.16	0.0211	0.507
regulation of neurotransmitter secretion (GO:0046928)	123	4	0.78	+	5.14	0.00802	0.276
memory (GO:0007613)	154	5	0.97	+	5.14	0.00312	0.156
salivary gland morphogenesis (GO:0007435)	31	1	0.2	+	5.10	0.178	1
negative regulation of myoblast differentiation (GO:0045662)	31	1	0.2	+	5.10	0.178	1
postsynaptic membrane organization (GO:0001941)	31	1	0.2	+	5.10	0.178	1
regulation of postsynaptic membrane potential (GO:0060078)	62	2	0.39	+	5.10	0.0592	0.85
negative regulation of cell junction assembly (GO:1901889)	31	1	0.2	+	5.10	0.178	1
positive regulation of receptor internalization (GO:0002092)	31	1	0.2	+	5.10	0.178	1
cellular response to fibroblast growth factor stimulus (GO:0044344)	62	2	0.39	+	5.10	0.0592	0.849
neuron fate specification (GO:0048665)	31	1	0.2	+	5.10	0.178	1
lung alveolus development (GO:0048286)	62	2	0.39	+	5.10	0.0592	0.849
vesicle docking (GO:0048278)	62	2	0.39	+	5.10	0.0592	0.848
regulation of hair cycle (GO:0042634)	31	1	0.2	+	5.10	0.178	1
negative regulation of cardiac muscle tissue growth (GO:0055022)	31	1	0.2	+	5.10	0.178	1
negative regulation of blood circulation (GO:1903523)	31	1	0.2	+	5.10	0.178	1
negative regulation of exocytosis (GO:0045920)	31	1	0.2	+	5.10	0.178	1
negative regulation of heart growth (GO:0061117)	31	1	0.2	+	5.10	0.178	1
extracellular matrix assembly (GO:0085029)	31	1	0.2	+	5.10	0.178	1
positive regulation of cartilage development (GO:0061036)	31	1	0.2	+	5.10	0.178	1
regulation of animal organ formation (GO:0003156)	31	1	0.2	+	5.10	0.178	1
cognition (GO:0050890)	342	11	2.16	+	5.09	1.3e-05	0.00211
synaptic vesicle cycle (GO:0099504)	125	4	0.79	+	5.06	0.00848	0.29
positive regulation of nervous system development (GO:0051962)	345	11	2.18	+	5.04	1.41e-05	0.00224
regulation of neurotransmitter levels (GO:0001505)	251	8	1.59	+	5.04	0.000216	0.0215
regulation of muscle contraction (GO:0006937)	157	5	0.99	+	5.04	0.00339	0.161
regulation of nervous system development (GO:0051960)	534	17	3.38	+	5.04	5.82e-08	1.5e-05
mesoderm formation (GO:0001707)	63	2	0.4	+	5.02	0.0609	0.87
regulation of focal adhesion assembly (GO:0051893)	63	2	0.4	+	5.02	0.0609	0.869
regulation of cell-substrate junction assembly (GO:0090109)	63	2	0.4	+	5.02	0.0609	0.869
regulation of postsynaptic membrane neurotransmitter receptor levels (GO:0099072)	63	2	0.4	+	5.02	0.0609	0.868
chemical synaptic transmission (GO:0007268)	347	11	2.19	+	5.01	1.48e-05	0.00231
anterograde trans-synaptic signaling (GO:0098916)	347	11	2.19	+	5.01	1.48e-05	0.00229
regulation of protein depolymerization (GO:1901879)	95	3	0.6	+	5.00	0.0229	0.546
ameboidal-type cell migration (GO:0001667)	190	6	1.2	+	5.00	0.00141	0.093
negative regulation of peptide secretion (GO:0002792)	95	3	0.6	+	5.00	0.0229	0.545
neuron differentiation (GO:0030182)	1083	34	6.85	+	4.97	6.19e-15	9.74e-12
regulation of GTPase activity (GO:0043087)	319	10	2.02	+	4.96	4.02e-05	0.0056
forebrain development (GO:0030900)	383	12	2.42	+	4.96	6.73e-06	0.00119
regulation of chemotaxis (GO:0050920)	224	7	1.42	+	4.94	0.000603	0.0492
lung epithelial cell differentiation (GO:0060487)	32	1	0.2	+	4.94	0.183	1
epithelial tube branching involved in lung morphogenesis (GO:0060441)	32	1	0.2	+	4.94	0.183	1
response to fibroblast growth factor (GO:0071774)	64	2	0.4	+	4.94	0.0626	0.869
maternal placenta development (GO:0001893)	32	1	0.2	+	4.94	0.183	1
acetylcholine receptor signaling pathway (GO:0095500)	32	1	0.2	+	4.94	0.183	1
protein dephosphorylation (GO:0006470)	160	5	1.01	+	4.94	0.00367	0.17
regulation of fibroblast growth factor receptor signaling pathway (GO:0040036)	32	1	0.2	+	4.94	0.183	1
negative regulation of peptide hormone secretion (GO:0090278)	64	2	0.4	+	4.94	0.0626	0.868
regulation of actin nucleation (GO:0051125)	32	1	0.2	+	4.94	0.183	1
muscle adaptation (GO:0043500)	32	1	0.2	+	4.94	0.183	1
necrotic cell death (GO:0070265)	32	1	0.2	+	4.94	0.183	1
positive regulation of cell-substrate junction organization (GO:0150117)	32	1	0.2	+	4.94	0.183	1
coronary vasculature morphogenesis (GO:0060977)	32	1	0.2	+	4.94	0.183	1
myotube cell development (GO:0014904)	32	1	0.2	+	4.94	0.183	1
cell differentiation involved in embryonic placenta development (GO:0060706)	32	1	0.2	+	4.94	0.183	1
embryonic placenta morphogenesis (GO:0060669)	32	1	0.2	+	4.94	0.183	1
striated muscle tissue development (GO:0014706)	321	10	2.03	+	4.93	4.24e-05	0.00585
sodium ion transport (GO:0006814)	161	5	1.02	+	4.91	0.00376	0.174
establishment of cell polarity (GO:0030010)	129	4	0.82	+	4.91	0.00943	0.317
central nervous system development (GO:0007417)	875	27	5.53	+	4.88	8.88e-12	8.74e-09
regulation of sodium ion transmembrane transport (GO:1902305)	65	2	0.41	+	4.87	0.0643	0.888
endothelial cell migration (GO:0043542)	65	2	0.41	+	4.87	0.0643	0.887
positive regulation of cell morphogenesis involved in differentiation (GO:0010770)	98	3	0.62	+	4.84	0.0248	0.579
limb development (GO:0060173)	197	6	1.25	+	4.82	0.00169	0.104
appendage development (GO:0048736)	197	6	1.25	+	4.82	0.00169	0.104
regulation of developmental growth (GO:0048638)	394	12	2.49	+	4.82	8.91e-06	0.00149
lung cell differentiation (GO:0060479)	33	1	0.21	+	4.79	0.188	1
JNK cascade (GO:0007254)	66	2	0.42	+	4.79	0.066	0.909
centrosome localization (GO:0051642)	33	1	0.21	+	4.79	0.188	1
embryonic digestive tract development (GO:0048566)	33	1	0.21	+	4.79	0.188	1
hair follicle morphogenesis (GO:0031069)	33	1	0.21	+	4.79	0.188	1
microtubule polymerization (GO:0046785)	33	1	0.21	+	4.79	0.188	1
negative regulation of gene silencing (GO:0060969)	33	1	0.21	+	4.79	0.188	1
cardiocyte differentiation (GO:0035051)	132	4	0.83	+	4.79	0.0102	0.337
regulation of morphogenesis of a branching structure (GO:0060688)	66	2	0.42	+	4.79	0.066	0.908
endocardial cushion morphogenesis (GO:0003203)	33	1	0.21	+	4.79	0.188	1
negative regulation of GTPase activity (GO:0034260)	33	1	0.21	+	4.79	0.188	1
negative regulation of cytoskeleton organization (GO:0051494)	165	5	1.04	+	4.79	0.00417	0.189
negative regulation of supramolecular fiber organization (GO:1902904)	165	5	1.04	+	4.79	0.00417	0.189
positive regulation of synaptic transmission (GO:0050806)	166	5	1.05	+	4.76	0.00428	0.19
limbic system development (GO:0021761)	100	3	0.63	+	4.75	0.0261	0.571
heart process (GO:0003015)	100	3	0.63	+	4.75	0.0261	0.57
organ growth (GO:0035265)	100	3	0.63	+	4.75	0.0261	0.57
negative regulation of cell development (GO:0010721)	200	6	1.26	+	4.75	0.00182	0.108
hindbrain development (GO:0030902)	167	5	1.06	+	4.74	0.00439	0.194
positive regulation of actin filament bundle assembly (GO:0032233)	67	2	0.42	+	4.72	0.0677	0.905
mesoderm morphogenesis (GO:0048332)	67	2	0.42	+	4.72	0.0677	0.904
peptide hormone secretion (GO:0030072)	67	2	0.42	+	4.72	0.0677	0.903
regulation of neurogenesis (GO:0050767)	436	13	2.76	+	4.72	4.66e-06	0.000853
plasma membrane organization (GO:0007009)	101	3	0.64	+	4.70	0.0268	0.579
regeneration (GO:0031099)	101	3	0.64	+	4.70	0.0268	0.579
establishment or maintenance of cell polarity (GO:0007163)	203	6	1.28	+	4.68	0.00196	0.113
cell adhesion (GO:0007155)	846	25	5.35	+	4.67	1.44e-10	9.04e-08
camera-type eye photoreceptor cell differentiation (GO:0060219)	34	1	0.21	+	4.65	0.194	1
positive regulation of T cell migration (GO:2000406)	34	1	0.21	+	4.65	0.194	1
regulation of myeloid cell apoptotic process (GO:0033032)	34	1	0.21	+	4.65	0.194	1
actin filament capping (GO:0051693)	34	1	0.21	+	4.65	0.194	1
positive regulation of leukocyte apoptotic process (GO:2000108)	34	1	0.21	+	4.65	0.194	1
negative regulation of cellular response to growth factor stimulus (GO:0090288)	102	3	0.64	+	4.65	0.0274	0.588
regulation of presynapse assembly (GO:1905606)	34	1	0.21	+	4.65	0.194	1
developmental cell growth (GO:0048588)	102	3	0.64	+	4.65	0.0274	0.588
regulation of neutrophil chemotaxis (GO:0090022)	34	1	0.21	+	4.65	0.194	1
import across plasma membrane (GO:0098739)	136	4	0.86	+	4.65	0.0113	0.364
inorganic anion transmembrane transport (GO:0098661)	68	2	0.43	+	4.65	0.0695	0.921
chondroitin sulfate proteoglycan metabolic process (GO:0050654)	34	1	0.21	+	4.65	0.194	1
exploration behavior (GO:0035640)	34	1	0.21	+	4.65	0.194	1
cellular response to acetylcholine (GO:1905145)	34	1	0.21	+	4.65	0.194	1
response to acetylcholine (GO:1905144)	34	1	0.21	+	4.65	0.194	1
protein secretion (GO:0009306)	102	3	0.64	+	4.65	0.0274	0.587
microtubule organizing center localization (GO:0061842)	34	1	0.21	+	4.65	0.194	1
cardiac muscle cell development (GO:0055013)	68	2	0.43	+	4.65	0.0695	0.92
cyclic nucleotide metabolic process (GO:0009187)	34	1	0.21	+	4.65	0.194	1
regulation of cell-substrate junction organization (GO:0150116)	68	2	0.43	+	4.65	0.0695	0.919
limb morphogenesis (GO:0035108)	170	5	1.07	+	4.65	0.00472	0.207
appendage morphogenesis (GO:0035107)	170	5	1.07	+	4.65	0.00472	0.207
positive regulation of Wnt signaling pathway (GO:0030177)	136	4	0.86	+	4.65	0.0113	0.363
cardiac atrium morphogenesis (GO:0003209)	34	1	0.21	+	4.65	0.194	1
muscle tissue development (GO:0060537)	340	10	2.15	+	4.65	6.81e-05	0.00901
generation of neurons (GO:0048699)	1366	40	8.64	+	4.63	1.41e-16	2.22e-12
biological adhesion (GO:0022610)	856	25	5.41	+	4.62	1.83e-10	1.03e-07
regulation of endothelial cell proliferation (GO:0001936)	137	4	0.87	+	4.62	0.0115	0.37
response to purine-containing compound (GO:0014074)	103	3	0.65	+	4.61	0.0281	0.6
establishment of protein localization to extracellular region (GO:0035592)	103	3	0.65	+	4.61	0.0281	0.599
neuron projection extension (GO:1990138)	69	2	0.44	+	4.59	0.0713	0.94
cardiac muscle tissue morphogenesis (GO:0055008)	69	2	0.44	+	4.59	0.0713	0.939
regulation of glucose import (GO:0046324)	69	2	0.44	+	4.59	0.0713	0.938
regulation of membrane potential (GO:0042391)	451	13	2.85	+	4.56	6.67e-06	0.00119
regulation of plasma membrane bounded cell projection organization (GO:0120035)	730	21	4.61	+	4.55	8.03e-09	2.43e-06
salivary gland development (GO:0007431)	35	1	0.22	+	4.52	0.199	1
regulation of homotypic cell-cell adhesion (GO:0034110)	35	1	0.22	+	4.52	0.199	1
dopaminergic neuron differentiation (GO:0071542)	35	1	0.22	+	4.52	0.199	1
regulation of neurotransmitter transport (GO:0051588)	140	4	0.89	+	4.52	0.0124	0.391
response to axon injury (GO:0048678)	35	1	0.22	+	4.52	0.199	1
cellular response to nerve growth factor stimulus (GO:1990090)	35	1	0.22	+	4.52	0.199	1
response to nerve growth factor (GO:1990089)	35	1	0.22	+	4.52	0.199	1
actin cytoskeleton reorganization (GO:0031532)	70	2	0.44	+	4.52	0.073	0.958
skeletal muscle tissue regeneration (GO:0043403)	35	1	0.22	+	4.52	0.199	1
regulation of long-term neuronal synaptic plasticity (GO:0048169)	35	1	0.22	+	4.52	0.199	1
positive regulation of Rho protein signal transduction (GO:0035025)	35	1	0.22	+	4.52	0.199	1
neural retina development (GO:0003407)	70	2	0.44	+	4.52	0.073	0.957
regulation of cell fate commitment (GO:0010453)	35	1	0.22	+	4.52	0.199	1
cardiac ventricle development (GO:0003231)	140	4	0.89	+	4.52	0.0124	0.39
cell proliferation in forebrain (GO:0021846)	35	1	0.22	+	4.52	0.199	1
striated muscle contraction (GO:0006941)	105	3	0.66	+	4.52	0.0295	0.622
regulation of blood circulation (GO:1903522)	246	7	1.56	+	4.50	0.00104	0.0729
locomotory behavior (GO:0007626)	246	7	1.56	+	4.50	0.00104	0.0725
cardiac chamber morphogenesis (GO:0003206)	141	4	0.89	+	4.49	0.0127	0.365
positive regulation of canonical Wnt signaling pathway (GO:0090263)	106	3	0.67	+	4.48	0.0302	0.634
adult locomotory behavior (GO:0008344)	106	3	0.67	+	4.48	0.0302	0.633
peripheral nervous system development (GO:0007422)	71	2	0.45	+	4.46	0.0748	0.96
somitogenesis (GO:0001756)	71	2	0.45	+	4.46	0.0748	0.959
nephron morphogenesis (GO:0072028)	71	2	0.45	+	4.46	0.0748	0.958
regulation of cardiac muscle hypertrophy (GO:0010611)	71	2	0.45	+	4.46	0.0748	0.957
regulation of cell projection organization (GO:0031344)	746	21	4.72	+	4.45	1.16e-08	3.4e-06
startle response (GO:0001964)	36	1	0.23	+	4.39	0.204	1
regulation of mitotic spindle organization (GO:0060236)	36	1	0.23	+	4.39	0.204	1
nucleus localization (GO:0051647)	36	1	0.23	+	4.39	0.204	1
regulation of protein targeting to membrane (GO:0090313)	36	1	0.23	+	4.39	0.204	1
negative regulation of ion transmembrane transporter activity (GO:0032413)	72	2	0.46	+	4.39	0.0767	0.977
non-canonical Wnt signaling pathway (GO:0035567)	36	1	0.23	+	4.39	0.204	1
regulation of heart rate by cardiac conduction (GO:0086091)	36	1	0.23	+	4.39	0.204	1
regulation of keratinocyte proliferation (GO:0010837)	36	1	0.23	+	4.39	0.204	1
embryonic forelimb morphogenesis (GO:0035115)	36	1	0.23	+	4.39	0.204	1
cell differentiation involved in kidney development (GO:0061005)	36	1	0.23	+	4.39	0.204	1
positive regulation of neuron projection development (GO:0010976)	217	6	1.37	+	4.37	0.00272	0.143
regulation of cell morphogenesis (GO:0022604)	326	9	2.06	+	4.37	0.000252	0.0243
mesenchyme development (GO:0060485)	218	6	1.38	+	4.35	0.00278	0.145
positive regulation of anion transmembrane transport (GO:1903961)	73	2	0.46	+	4.33	0.0785	0.997
coronary vasculature development (GO:0060976)	73	2	0.46	+	4.33	0.0785	0.997
neurogenesis (GO:0022008)	1497	41	9.46	+	4.33	5.23e-16	4.11e-12
protein localization to extracellular region (GO:0071692)	110	3	0.7	+	4.31	0.0332	0.649
protein localization to cell periphery (GO:1990778)	257	7	1.62	+	4.31	0.00133	0.0895
MAPK cascade (GO:0000165)	147	4	0.93	+	4.30	0.0146	0.406
positive regulation of animal organ morphogenesis (GO:0110110)	37	1	0.23	+	4.28	0.209	1
embryonic placenta development (GO:0001892)	111	3	0.7	+	4.28	0.0339	0.657
columnar/cuboidal epithelial cell development (GO:0002066)	37	1	0.23	+	4.28	0.209	1
regulation of meiotic nuclear division (GO:0040020)	37	1	0.23	+	4.28	0.209	1
proximal/distal pattern formation (GO:0009954)	37	1	0.23	+	4.28	0.209	1
sodium ion homeostasis (GO:0055078)	37	1	0.23	+	4.28	0.209	1
neutrophil chemotaxis (GO:0030593)	74	2	0.47	+	4.28	0.0803	0.996
renal tubule morphogenesis (GO:0061333)	74	2	0.47	+	4.28	0.0803	0.995
dendritic spine organization (GO:0097061)	37	1	0.23	+	4.28	0.209	1
regulation of muscle hypertrophy (GO:0014743)	74	2	0.47	+	4.28	0.0803	0.994
kidney development (GO:0001822)	297	8	1.88	+	4.26	0.000652	0.0524
regulation of cytokine-mediated signaling pathway (GO:0001959)	112	3	0.71	+	4.24	0.0347	0.669
retina morphogenesis in camera-type eye (GO:0060042)	75	2	0.47	+	4.22	0.0822	1
negative regulation of protein polymerization (GO:0032272)	75	2	0.47	+	4.22	0.0822	1
cell fate commitment (GO:0045165)	263	7	1.66	+	4.21	0.00152	0.0986
regulation of cell migration (GO:0030334)	940	25	5.94	+	4.21	1.23e-09	4.85e-07
muscle structure development (GO:0061061)	491	13	3.1	+	4.19	1.63e-05	0.00249
anterior/posterior pattern specification (GO:0009952)	227	6	1.44	+	4.18	0.00339	0.162
heart morphogenesis (GO:0003007)	265	7	1.68	+	4.18	0.00158	0.0992
cerebral cortex radially oriented cell migration (GO:0021799)	38	1	0.24	+	4.16	0.214	1
activation of JUN kinase activity (GO:0007257)	38	1	0.24	+	4.16	0.214	1
cell-substrate junction assembly (GO:0007044)	38	1	0.24	+	4.16	0.214	1
excitatory postsynaptic potential (GO:0060079)	38	1	0.24	+	4.16	0.214	1
positive regulation of synaptic transmission, glutamatergic (GO:0051968)	38	1	0.24	+	4.16	0.214	1
cellular glucose homeostasis (GO:0001678)	76	2	0.48	+	4.16	0.0841	1
positive regulation of excitatory postsynaptic potential (GO:2000463)	38	1	0.24	+	4.16	0.214	1
regulation of amyloid-beta formation (GO:1902003)	38	1	0.24	+	4.16	0.214	1
organelle localization by membrane tethering (GO:0140056)	76	2	0.48	+	4.16	0.0841	1
epidermis morphogenesis (GO:0048730)	38	1	0.24	+	4.16	0.214	1
regulation of voltage-gated calcium channel activity (GO:1901385)	38	1	0.24	+	4.16	0.214	1
regulation of presynapse organization (GO:0099174)	38	1	0.24	+	4.16	0.214	1
response to pain (GO:0048265)	38	1	0.24	+	4.16	0.214	1
regulation of synaptic plasticity (GO:0048167)	228	6	1.44	+	4.16	0.00346	0.163
oligosaccharide metabolic process (GO:0009311)	38	1	0.24	+	4.16	0.214	1
G1/S transition of mitotic cell cycle (GO:0000082)	76	2	0.48	+	4.16	0.0841	1
peptidyl-tyrosine dephosphorylation (GO:0035335)	38	1	0.24	+	4.16	0.214	1
cell growth (GO:0016049)	114	3	0.72	+	4.16	0.0363	0.69
regulation of alpha-beta T cell proliferation (GO:0046640)	38	1	0.24	+	4.16	0.214	1
positive regulation of muscle cell apoptotic process (GO:0010661)	38	1	0.24	+	4.16	0.214	1
cellular response to alcohol (GO:0097306)	76	2	0.48	+	4.16	0.0841	1
regulation of sprouting angiogenesis (GO:1903670)	38	1	0.24	+	4.16	0.214	1
regulation of lamellipodium assembly (GO:0010591)	38	1	0.24	+	4.16	0.214	1
positive regulation of epithelial cell apoptotic process (GO:1904037)	38	1	0.24	+	4.16	0.214	1
regulation of platelet activation (GO:0010543)	38	1	0.24	+	4.16	0.214	1
placenta blood vessel development (GO:0060674)	38	1	0.24	+	4.16	0.214	1
negative regulation of mitotic nuclear division (GO:0045839)	38	1	0.24	+	4.16	0.214	1
positive regulation of GTPase activity (GO:0043547)	229	6	1.45	+	4.14	0.00353	0.166
cardiac muscle tissue development (GO:0048738)	191	5	1.21	+	4.14	0.00762	0.269
regulation of cellular component movement (GO:0051270)	1076	28	6.8	+	4.12	1.73e-10	1.01e-07
positive regulation of interferon-gamma production (GO:0032729)	77	2	0.49	+	4.11	0.0859	1
dendrite morphogenesis (GO:0048813)	77	2	0.49	+	4.11	0.0859	1
exocytic process (GO:0140029)	77	2	0.49	+	4.11	0.0859	1
regulation of cell morphogenesis involved in differentiation (GO:0010769)	116	3	0.73	+	4.09	0.0379	0.679
cell cycle G1/S phase transition (GO:0044843)	78	2	0.49	+	4.06	0.0878	1
renal system development (GO:0072001)	312	8	1.97	+	4.06	0.000894	0.0664
positive regulation of lymphocyte migration (GO:2000403)	39	1	0.25	+	4.06	0.219	1
regulation of protein localization to cell surface (GO:2000008)	39	1	0.25	+	4.06	0.219	1
response to carbohydrate (GO:0009743)	117	3	0.74	+	4.06	0.0387	0.691
positive regulation of purine nucleotide metabolic process (GO:1900544)	39	1	0.25	+	4.06	0.219	1
negative regulation of potassium ion transport (GO:0043267)	39	1	0.25	+	4.06	0.219	1
regulation of cyclase activity (GO:0031279)	39	1	0.25	+	4.06	0.219	1
cell-substrate junction organization (GO:0150115)	39	1	0.25	+	4.06	0.219	1
glycerophospholipid biosynthetic process (GO:0046474)	117	3	0.74	+	4.06	0.0387	0.69
lamellipodium assembly (GO:0030032)	39	1	0.25	+	4.06	0.219	1
positive regulation of nucleotide metabolic process (GO:0045981)	39	1	0.25	+	4.06	0.219	1
pituitary gland development (GO:0021983)	39	1	0.25	+	4.06	0.219	1
cardiac atrium development (GO:0003230)	39	1	0.25	+	4.06	0.219	1
negative regulation of protein serine/threonine kinase activity (GO:0071901)	118	3	0.75	+	4.02	0.0395	0.701
positive regulation of cell projection organization (GO:0031346)	433	11	2.74	+	4.02	0.000107	0.013
mesenchymal cell differentiation (GO:0048762)	158	4	1	+	4.00	0.0185	0.486
plasma membrane bounded cell projection organization (GO:0120036)	1108	28	7	+	4.00	3.34e-10	1.64e-07
regulation of cell motility (GO:2000145)	990	25	6.26	+	3.99	3.48e-09	1.1e-06
regulation of epithelial cell migration (GO:0010632)	238	6	1.5	+	3.99	0.00425	0.19
pallium development (GO:0021543)	159	4	1.01	+	3.98	0.0189	0.463
regulation of locomotion (GO:0040012)	1038	26	6.56	+	3.96	1.9e-09	6.81e-07
regulation of canonical Wnt signaling pathway (GO:0060828)	240	6	1.52	+	3.95	0.00443	0.195
regulation of neuroblast proliferation (GO:1902692)	40	1	0.25	+	3.95	0.224	1
regulation of transcription initiation from RNA polymerase II promoter (GO:0060260)	40	1	0.25	+	3.95	0.224	1
lens development in camera-type eye (GO:0002088)	80	2	0.51	+	3.95	0.0917	1
fatty acid derivative metabolic process (GO:1901568)	40	1	0.25	+	3.95	0.224	1
regulation of spindle organization (GO:0090224)	40	1	0.25	+	3.95	0.224	1
stress-activated MAPK cascade (GO:0051403)	80	2	0.51	+	3.95	0.0917	1
acidic amino acid transport (GO:0015800)	40	1	0.25	+	3.95	0.224	1
eye photoreceptor cell development (GO:0042462)	40	1	0.25	+	3.95	0.224	1
synaptic transmission, glutamatergic (GO:0035249)	40	1	0.25	+	3.95	0.224	1
vasoconstriction (GO:0042310)	40	1	0.25	+	3.95	0.224	1
positive regulation of ATP metabolic process (GO:1903580)	40	1	0.25	+	3.95	0.224	1
cell migration (GO:0016477)	884	22	5.59	+	3.94	4.41e-08	1.2e-05
calcium-mediated signaling (GO:0019722)	121	3	0.76	+	3.92	0.042	0.735
muscle tissue morphogenesis (GO:0060415)	81	2	0.51	+	3.91	0.0936	1
granulocyte chemotaxis (GO:0071621)	81	2	0.51	+	3.91	0.0936	1
metanephros development (GO:0001656)	81	2	0.51	+	3.91	0.0936	1
negative regulation of transporter activity (GO:0032410)	81	2	0.51	+	3.91	0.0936	1
membrane docking (GO:0022406)	81	2	0.51	+	3.91	0.0936	1
positive regulation of neurogenesis (GO:0050769)	284	7	1.8	+	3.90	0.00233	0.127
protein localization to plasma membrane (GO:0072659)	203	5	1.28	+	3.90	0.00974	0.325
regulation of muscle system process (GO:0090257)	244	6	1.54	+	3.89	0.00479	0.207
regulation of response to cytokine stimulus (GO:0060759)	122	3	0.77	+	3.89	0.0429	0.745
behavior (GO:0007610)	694	17	4.39	+	3.87	2.14e-06	0.000438
negative regulation of transmembrane receptor protein serine/threonine kinase signaling pathway (GO:0090101)	123	3	0.78	+	3.86	0.0438	0.732
regulation of tissue remodeling (GO:0034103)	82	2	0.52	+	3.86	0.0955	1
nerve development (GO:0021675)	82	2	0.52	+	3.86	0.0955	1
morphogenesis of a branching structure (GO:0001763)	205	5	1.3	+	3.86	0.0101	0.336
nephron tubule development (GO:0072080)	82	2	0.52	+	3.86	0.0955	1
regulation of dopamine secretion (GO:0014059)	41	1	0.26	+	3.86	0.229	1
cellular response to epidermal growth factor stimulus (GO:0071364)	41	1	0.26	+	3.86	0.229	1
branching morphogenesis of an epithelial tube (GO:0048754)	164	4	1.04	+	3.86	0.0208	0.507
embryonic axis specification (GO:0000578)	41	1	0.26	+	3.86	0.229	1
response to cold (GO:0009409)	41	1	0.26	+	3.86	0.229	1
negative regulation of actin filament depolymerization (GO:0030835)	41	1	0.26	+	3.86	0.229	1
amino acid import (GO:0043090)	41	1	0.26	+	3.86	0.229	1
positive regulation of protein dephosphorylation (GO:0035307)	41	1	0.26	+	3.86	0.229	1
negative regulation of insulin receptor signaling pathway (GO:0046627)	41	1	0.26	+	3.86	0.229	1
execution phase of apoptosis (GO:0097194)	41	1	0.26	+	3.86	0.229	1
cell-cell signaling (GO:0007267)	821	20	5.19	+	3.85	2.71e-07	6.47e-05
locomotion (GO:0040011)	1232	30	7.79	+	3.85	1.67e-10	1.01e-07
regulation of actin filament-based process (GO:0032970)	411	10	2.6	+	3.85	0.000311	0.0286
regulation of cell development (GO:0060284)	576	14	3.64	+	3.84	1.95e-05	0.00292
post-embryonic development (GO:0009791)	124	3	0.78	+	3.83	0.0447	0.744
peptide secretion (GO:0002790)	124	3	0.78	+	3.83	0.0447	0.743
growth (GO:0040007)	455	11	2.88	+	3.82	0.000164	0.0181
cellular response to ketone (GO:1901655)	83	2	0.52	+	3.81	0.0975	1
sphingolipid biosynthetic process (GO:0030148)	83	2	0.52	+	3.81	0.0975	1
cell projection organization (GO:0030030)	1164	28	7.36	+	3.81	9.98e-10	4.03e-07
regulation of epithelial cell proliferation (GO:0050678)	375	9	2.37	+	3.80	0.000685	0.0539
positive regulation of endocytosis (GO:0045807)	125	3	0.79	+	3.80	0.0455	0.753
vesicle docking involved in exocytosis (GO:0006904)	42	1	0.27	+	3.77	0.233	1
localization within membrane (GO:0051668)	84	2	0.53	+	3.77	0.0995	1
regulation of establishment of planar polarity (GO:0090175)	42	1	0.27	+	3.77	0.233	1
regulation of lyase activity (GO:0051339)	42	1	0.27	+	3.77	0.233	1
negative regulation of protein secretion (GO:0050709)	84	2	0.53	+	3.77	0.0995	1
response to pH (GO:0009268)	42	1	0.27	+	3.77	0.233	1
positive regulation of substrate adhesion-dependent cell spreading (GO:1900026)	42	1	0.27	+	3.77	0.233	1
positive regulation of bone mineralization (GO:0030501)	42	1	0.27	+	3.77	0.233	1
regulation of fibroblast migration (GO:0010762)	42	1	0.27	+	3.77	0.233	1
negative regulation of leukocyte migration (GO:0002686)	42	1	0.27	+	3.77	0.233	1
positive regulation of epithelial cell proliferation (GO:0050679)	211	5	1.33	+	3.75	0.0114	0.366
columnar/cuboidal epithelial cell differentiation (GO:0002065)	85	2	0.54	+	3.72	0.101	1
vesicle-mediated transport to the plasma membrane (GO:0098876)	85	2	0.54	+	3.72	0.101	1
epithelial cell migration (GO:0010631)	85	2	0.54	+	3.72	0.101	1
calcium ion transport (GO:0006816)	213	5	1.35	+	3.71	0.0118	0.377
response to calcium ion (GO:0051592)	128	3	0.81	+	3.71	0.0482	0.782
nephron development (GO:0072006)	129	3	0.82	+	3.68	0.0492	0.794
regulation of protein-containing complex disassembly (GO:0043244)	129	3	0.82	+	3.68	0.0492	0.793
cell fate specification (GO:0001708)	86	2	0.54	+	3.68	0.103	1
eye development (GO:0001654)	387	9	2.45	+	3.68	0.000854	0.064
oligodendrocyte development (GO:0014003)	43	1	0.27	+	3.68	0.238	1
neurotransmitter receptor transport (GO:0099637)	43	1	0.27	+	3.68	0.238	1
neutrophil migration (GO:1990266)	86	2	0.54	+	3.68	0.103	1
apoptotic cell clearance (GO:0043277)	43	1	0.27	+	3.68	0.238	1
regulation of myotube differentiation (GO:0010830)	43	1	0.27	+	3.68	0.238	1
vasodilation (GO:0042311)	43	1	0.27	+	3.68	0.238	1
negative regulation of organ growth (GO:0046621)	43	1	0.27	+	3.68	0.238	1
embryonic heart tube development (GO:0035050)	86	2	0.54	+	3.68	0.103	1
positive regulation of JNK cascade (GO:0046330)	86	2	0.54	+	3.68	0.103	1
positive regulation of developmental growth (GO:0048639)	216	5	1.37	+	3.66	0.0125	0.391
negative regulation of secretion by cell (GO:1903531)	173	4	1.09	+	3.66	0.0247	0.579
regulation of anion transmembrane transport (GO:1903959)	130	3	0.82	+	3.65	0.0501	0.779
visual system development (GO:0150063)	390	9	2.47	+	3.65	0.000901	0.0666
epithelium migration (GO:0090132)	87	2	0.55	+	3.64	0.105	1
pancreas development (GO:0031016)	87	2	0.55	+	3.64	0.105	1
hormone secretion (GO:0046879)	87	2	0.55	+	3.64	0.105	1
neural precursor cell proliferation (GO:0061351)	87	2	0.55	+	3.64	0.105	1
nervous system development (GO:0007399)	2098	48	13.26	+	3.62	8.14e-16	4.27e-12
sensory system development (GO:0048880)	394	9	2.49	+	3.61	0.000967	0.0689
urogenital system development (GO:0001655)	351	8	2.22	+	3.61	0.00187	0.111
regulation of ossification (GO:0030278)	132	3	0.83	+	3.60	0.052	0.799
positive regulation of Notch signaling pathway (GO:0045747)	44	1	0.28	+	3.60	0.243	1
lung epithelium development (GO:0060428)	44	1	0.28	+	3.60	0.243	1
behavioral fear response (GO:0001662)	44	1	0.28	+	3.60	0.243	1
cellular response to retinoic acid (GO:0071300)	44	1	0.28	+	3.60	0.243	1
response to epidermal growth factor (GO:0070849)	44	1	0.28	+	3.60	0.243	1
regulation of T cell apoptotic process (GO:0070232)	44	1	0.28	+	3.60	0.243	1
negative regulation of anion transmembrane transport (GO:1903960)	44	1	0.28	+	3.60	0.243	1
response to organophosphorus (GO:0046683)	88	2	0.56	+	3.60	0.107	1
glial cell migration (GO:0008347)	44	1	0.28	+	3.60	0.243	1
regulation of anatomical structure morphogenesis (GO:0022603)	968	22	6.12	+	3.60	2.09e-07	5.15e-05
renal tubule development (GO:0061326)	88	2	0.56	+	3.60	0.107	1
positive regulation of glucose import (GO:0046326)	44	1	0.28	+	3.60	0.243	1
somite development (GO:0061053)	88	2	0.56	+	3.60	0.107	1
respiratory gaseous exchange by respiratory system (GO:0007585)	44	1	0.28	+	3.60	0.243	1
regulation of ion transmembrane transporter activity (GO:0032412)	265	6	1.68	+	3.58	0.00707	0.256
regulation of regulated secretory pathway (GO:1903305)	177	4	1.12	+	3.57	0.0266	0.577
developmental growth (GO:0048589)	443	10	2.8	+	3.57	0.000555	0.0465
positive regulation of inflammatory response (GO:0050729)	133	3	0.84	+	3.57	0.0529	0.81
digestive system development (GO:0055123)	133	3	0.84	+	3.57	0.0529	0.809
biomineralization (GO:0110148)	89	2	0.56	+	3.55	0.109	1
ceramide metabolic process (GO:0006672)	89	2	0.56	+	3.55	0.109	1
muscle organ morphogenesis (GO:0048644)	89	2	0.56	+	3.55	0.109	1
protein polymerization (GO:0051258)	89	2	0.56	+	3.55	0.109	1
biomineral tissue development (GO:0031214)	89	2	0.56	+	3.55	0.109	1
regulation of glucose transmembrane transport (GO:0010827)	89	2	0.56	+	3.55	0.109	1
kidney morphogenesis (GO:0060993)	89	2	0.56	+	3.55	0.109	1
dephosphorylation (GO:0016311)	224	5	1.42	+	3.53	0.0144	0.4
negative regulation of neuron differentiation (GO:0045665)	90	2	0.57	+	3.52	0.111	1
post-Golgi vesicle-mediated transport (GO:0006892)	90	2	0.57	+	3.52	0.111	1
negative regulation of protein kinase B signaling (GO:0051898)	45	1	0.28	+	3.52	0.248	1
tissue migration (GO:0090130)	90	2	0.57	+	3.52	0.111	1
spleen development (GO:0048536)	45	1	0.28	+	3.52	0.248	1
synaptic vesicle transport (GO:0048489)	45	1	0.28	+	3.52	0.248	1
regulation of calcium ion-dependent exocytosis (GO:0017158)	45	1	0.28	+	3.52	0.248	1
prostate gland development (GO:0030850)	45	1	0.28	+	3.52	0.248	1
regulation of vascular permeability (GO:0043114)	45	1	0.28	+	3.52	0.248	1
negative regulation of cellular response to insulin stimulus (GO:1900077)	45	1	0.28	+	3.52	0.248	1
negative regulation of hormone secretion (GO:0046888)	90	2	0.57	+	3.52	0.111	1
ear morphogenesis (GO:0042471)	135	3	0.85	+	3.52	0.0549	0.834
forelimb morphogenesis (GO:0035136)	45	1	0.28	+	3.52	0.248	1
circadian rhythm (GO:0007623)	135	3	0.85	+	3.52	0.0549	0.833
mating (GO:0007618)	45	1	0.28	+	3.52	0.248	1
positive regulation of cell development (GO:0010720)	361	8	2.28	+	3.51	0.00222	0.124
positive regulation of cellular protein localization (GO:1903829)	272	6	1.72	+	3.49	0.00798	0.278
movement of cell or subcellular component (GO:0006928)	1454	32	9.19	+	3.48	4.56e-10	2.18e-07
adult behavior (GO:0030534)	182	4	1.15	+	3.48	0.029	0.614
regulation of protein polymerization (GO:0032271)	228	5	1.44	+	3.47	0.0154	0.423
regulation of endocytosis (GO:0030100)	228	5	1.44	+	3.47	0.0154	0.423
second-messenger-mediated signaling (GO:0019932)	183	4	1.16	+	3.46	0.0295	0.621
glycosphingolipid metabolic process (GO:0006687)	46	1	0.29	+	3.44	0.253	1
behavioral defense response (GO:0002209)	46	1	0.29	+	3.44	0.253	1
branching involved in ureteric bud morphogenesis (GO:0001658)	46	1	0.29	+	3.44	0.253	1
regulation of T cell migration (GO:2000404)	46	1	0.29	+	3.44	0.253	1
positive regulation of phospholipase activity (GO:0010518)	46	1	0.29	+	3.44	0.253	1
adult walking behavior (GO:0007628)	46	1	0.29	+	3.44	0.253	1
regulation of membrane depolarization (GO:0003254)	46	1	0.29	+	3.44	0.253	1
regulation of amyloid precursor protein catabolic process (GO:1902991)	46	1	0.29	+	3.44	0.253	1
adherens junction organization (GO:0034332)	46	1	0.29	+	3.44	0.253	1
negative regulation of endocytosis (GO:0045806)	46	1	0.29	+	3.44	0.253	1
Ras protein signal transduction (GO:0007265)	138	3	0.87	+	3.44	0.0578	0.838
regulation of cellular component size (GO:0032535)	414	9	2.62	+	3.44	0.00136	0.0907
regulation of transmembrane transporter activity (GO:0022898)	276	6	1.74	+	3.44	0.00853	0.291
endocrine system development (GO:0035270)	138	3	0.87	+	3.44	0.0578	0.837
potassium ion transmembrane transport (GO:0071805)	139	3	0.88	+	3.41	0.0588	0.85
glycerolipid biosynthetic process (GO:0045017)	139	3	0.88	+	3.41	0.0588	0.849
negative regulation of protein-containing complex assembly (GO:0031333)	139	3	0.88	+	3.41	0.0588	0.848
dendrite development (GO:0016358)	139	3	0.88	+	3.41	0.0588	0.847
sensory organ development (GO:0007423)	603	13	3.81	+	3.41	0.000129	0.0153
angiogenesis (GO:0001525)	325	7	2.05	+	3.41	0.00484	0.207
localization of cell (GO:0051674)	1023	22	6.47	+	3.40	5.29e-07	0.000122
cell motility (GO:0048870)	1023	22	6.47	+	3.40	5.29e-07	0.000121
multicellular organismal response to stress (GO:0033555)	93	2	0.59	+	3.40	0.118	1
positive regulation of endothelial cell proliferation (GO:0001938)	93	2	0.59	+	3.40	0.118	1
axis specification (GO:0009798)	93	2	0.59	+	3.40	0.118	1
import into cell (GO:0098657)	186	4	1.18	+	3.40	0.0311	0.649
export from cell (GO:0140352)	419	9	2.65	+	3.40	0.00147	0.0967
transmembrane receptor protein serine/threonine kinase signaling pathway (GO:0007178)	187	4	1.18	+	3.38	0.0316	0.623
maternal process involved in female pregnancy (GO:0060135)	47	1	0.3	+	3.37	0.257	1
negative regulation of nuclear division (GO:0051784)	47	1	0.3	+	3.37	0.257	1
embryonic skeletal system development (GO:0048706)	141	3	0.89	+	3.37	0.0609	0.867
regulation of peptidyl-threonine phosphorylation (GO:0010799)	47	1	0.3	+	3.37	0.257	1
cardiac chamber development (GO:0003205)	188	4	1.19	+	3.37	0.0321	0.63
heart development (GO:0007507)	565	12	3.57	+	3.36	0.00027	0.0258
chloride transport (GO:0006821)	95	2	0.6	+	3.33	0.122	1
formation of primary germ layer (GO:0001704)	95	2	0.6	+	3.33	0.122	1
hormone transport (GO:0009914)	95	2	0.6	+	3.33	0.122	1
positive regulation of supramolecular fiber organization (GO:1902905)	190	4	1.2	+	3.33	0.0332	0.648
regulation of supramolecular fiber organization (GO:1902903)	380	8	2.4	+	3.33	0.00303	0.154
regulation of anatomical structure size (GO:0090066)	570	12	3.6	+	3.33	0.000293	0.0274
cell development (GO:0048468)	1810	38	11.44	+	3.32	2.66e-11	2.2e-08
embryonic limb morphogenesis (GO:0030326)	143	3	0.9	+	3.32	0.0629	0.872
embryonic appendage morphogenesis (GO:0035113)	143	3	0.9	+	3.32	0.0629	0.871
regulation of exocytosis (GO:0017157)	239	5	1.51	+	3.31	0.0184	0.486
regulation of transporter activity (GO:0032409)	287	6	1.81	+	3.31	0.0102	0.337
gland development (GO:0048732)	431	9	2.72	+	3.30	0.00178	0.107
regulation of lamellipodium organization (GO:1902743)	48	1	0.3	+	3.30	0.262	1
regulation of neutrophil migration (GO:1902622)	48	1	0.3	+	3.30	0.262	1
positive regulation of cytokine-mediated signaling pathway (GO:0001961)	48	1	0.3	+	3.30	0.262	1
phospholipid translocation (GO:0045332)	48	1	0.3	+	3.30	0.262	1
nephron epithelium development (GO:0072009)	96	2	0.61	+	3.30	0.124	1
walking behavior (GO:0090659)	48	1	0.3	+	3.30	0.262	1
neuron projection organization (GO:0106027)	48	1	0.3	+	3.30	0.262	1
postsynapse organization (GO:0099173)	96	2	0.61	+	3.30	0.124	1
regulation of muscle cell differentiation (GO:0051147)	144	3	0.91	+	3.30	0.064	0.884
regulation of CD4-positive, alpha-beta T cell differentiation (GO:0043370)	48	1	0.3	+	3.30	0.262	1
lamellipodium organization (GO:0097581)	48	1	0.3	+	3.30	0.262	1
regulation of gene silencing by miRNA (GO:0060964)	48	1	0.3	+	3.30	0.262	1
proteoglycan biosynthetic process (GO:0030166)	48	1	0.3	+	3.30	0.262	1
secondary metabolic process (GO:0019748)	48	1	0.3	+	3.30	0.262	1
regulation of cytoskeleton organization (GO:0051493)	529	11	3.34	+	3.29	0.000581	0.0482
positive regulation of cellular component biogenesis (GO:0044089)	529	11	3.34	+	3.29	0.000581	0.0479
ear development (GO:0043583)	241	5	1.52	+	3.28	0.019	0.467
calcium ion transmembrane transport (GO:0070588)	145	3	0.92	+	3.27	0.065	0.896
regulation of receptor signaling pathway via STAT (GO:1904892)	97	2	0.61	+	3.26	0.126	1
granulocyte migration (GO:0097530)	97	2	0.61	+	3.26	0.126	1
regulation of muscle cell apoptotic process (GO:0010660)	97	2	0.61	+	3.26	0.126	1
positive regulation of chemotaxis (GO:0050921)	146	3	0.92	+	3.25	0.0661	0.909
morphogenesis of a branching epithelium (GO:0061138)	195	4	1.23	+	3.24	0.036	0.687
muscle system process (GO:0003012)	244	5	1.54	+	3.24	0.02	0.488
glomerulus development (GO:0032835)	49	1	0.31	+	3.23	0.267	1
regulation of glycolytic process (GO:0006110)	49	1	0.31	+	3.23	0.267	1
camera-type eye morphogenesis (GO:0048593)	147	3	0.93	+	3.23	0.0671	0.922
regulation of muscle adaptation (GO:0043502)	98	2	0.62	+	3.23	0.128	1
SCF-dependent proteasomal ubiquitin-dependent protein catabolic process (GO:0031146)	49	1	0.31	+	3.23	0.267	1
stress-activated protein kinase signaling cascade (GO:0031098)	98	2	0.62	+	3.23	0.128	1
fear response (GO:0042596)	49	1	0.31	+	3.23	0.267	1
cyclic-nucleotide-mediated signaling (GO:0019935)	49	1	0.31	+	3.23	0.267	1
metal ion transport (GO:0030001)	294	6	1.86	+	3.23	0.0114	0.366
camera-type eye development (GO:0043010)	344	7	2.17	+	3.22	0.00653	0.242
activation of GTPase activity (GO:0090630)	99	2	0.63	+	3.20	0.13	1
regulation of heart rate (GO:0002027)	99	2	0.63	+	3.20	0.13	1
response to glucose (GO:0009749)	99	2	0.63	+	3.20	0.13	1
positive regulation of exocytosis (GO:0045921)	99	2	0.63	+	3.20	0.13	1
gastrulation (GO:0007369)	149	3	0.94	+	3.18	0.0693	0.919
lipid translocation (GO:0034204)	50	1	0.32	+	3.16	0.271	1
mitotic cell cycle phase transition (GO:0044772)	150	3	0.95	+	3.16	0.0704	0.93
sensory organ morphogenesis (GO:0090596)	300	6	1.9	+	3.16	0.0125	0.39
regulation of DNA-templated transcription, initiation (GO:2000142)	50	1	0.32	+	3.16	0.271	1
regulation of behavior (GO:0050795)	100	2	0.63	+	3.16	0.132	1
positive regulation of biomineral tissue development (GO:0070169)	50	1	0.32	+	3.16	0.271	1
regulation of BMP signaling pathway (GO:0030510)	100	2	0.63	+	3.16	0.132	1
negative regulation of cell growth (GO:0030308)	200	4	1.26	+	3.16	0.0389	0.691
response to alcohol (GO:0097305)	150	3	0.95	+	3.16	0.0704	0.929
protein localization to membrane (GO:0072657)	453	9	2.86	+	3.14	0.00249	0.136
negative regulation of cell population proliferation (GO:0008285)	705	14	4.46	+	3.14	0.000166	0.0181
segmentation (GO:0035282)	101	2	0.64	+	3.13	0.134	1
pattern specification process (GO:0007389)	456	9	2.88	+	3.12	0.0026	0.14
regionalization (GO:0003002)	355	7	2.24	+	3.12	0.0077	0.271
regulation of microtubule-based process (GO:0032886)	255	5	1.61	+	3.10	0.0236	0.559
positive regulation of glial cell differentiation (GO:0045687)	51	1	0.32	+	3.10	0.276	1
Golgi to plasma membrane transport (GO:0006893)	51	1	0.32	+	3.10	0.276	1
positive regulation of biomineralization (GO:0110151)	51	1	0.32	+	3.10	0.276	1
cranial nerve development (GO:0021545)	51	1	0.32	+	3.10	0.276	1
regulation of posttranscriptional gene silencing (GO:0060147)	51	1	0.32	+	3.10	0.276	1
genitalia development (GO:0048806)	51	1	0.32	+	3.10	0.276	1
regulation of oligodendrocyte differentiation (GO:0048713)	51	1	0.32	+	3.10	0.276	1
embryonic cranial skeleton morphogenesis (GO:0048701)	51	1	0.32	+	3.10	0.276	1
protein homotetramerization (GO:0051289)	51	1	0.32	+	3.10	0.276	1
response to hexose (GO:0009746)	102	2	0.64	+	3.10	0.137	1
negative regulation of secretion (GO:0051048)	204	4	1.29	+	3.10	0.0413	0.725
establishment of protein localization to plasma membrane (GO:0061951)	51	1	0.32	+	3.10	0.276	1
cellular response to drug (GO:0035690)	51	1	0.32	+	3.10	0.276	1
regulation of cytokine production involved in inflammatory response (GO:1900015)	51	1	0.32	+	3.10	0.276	1
regulation of Wnt signaling pathway (GO:0030111)	307	6	1.94	+	3.09	0.0138	0.391
import into nucleus (GO:0051170)	103	2	0.65	+	3.07	0.139	1
cardiac muscle cell differentiation (GO:0055007)	103	2	0.65	+	3.07	0.139	1
response to monosaccharide (GO:0034284)	103	2	0.65	+	3.07	0.139	1
negative regulation of protein kinase activity (GO:0006469)	207	4	1.31	+	3.06	0.0431	0.747
regulation of actin cytoskeleton organization (GO:0032956)	364	7	2.3	+	3.04	0.00876	0.298
regulation of bone resorption (GO:0045124)	52	1	0.33	+	3.04	0.28	1
regulation of multi-organism process (GO:0043900)	52	1	0.33	+	3.04	0.28	1
positive regulation of cytoskeleton organization (GO:0051495)	208	4	1.31	+	3.04	0.0438	0.731
protein-containing complex localization (GO:0031503)	208	4	1.31	+	3.04	0.0438	0.73
microtubule polymerization or depolymerization (GO:0031109)	52	1	0.33	+	3.04	0.28	1
regulation of gene silencing by RNA (GO:0060966)	52	1	0.33	+	3.04	0.28	1
positive regulation of cellular component organization (GO:0051130)	1203	23	7.6	+	3.02	2.09e-06	0.000434
vesicle localization (GO:0051648)	157	3	0.99	+	3.02	0.0783	0.995
negative regulation of growth (GO:0045926)	262	5	1.66	+	3.02	0.0261	0.572
lung development (GO:0030324)	210	4	1.33	+	3.01	0.0451	0.747
inner ear development (GO:0048839)	211	4	1.33	+	3.00	0.0457	0.755
regulation of cation transmembrane transport (GO:1904062)	370	7	2.34	+	2.99	0.00952	0.319
positive regulation of interleukin-8 production (GO:0032757)	53	1	0.34	+	2.98	0.285	1
positive regulation of interleukin-1 beta production (GO:0032731)	53	1	0.34	+	2.98	0.285	1
morphogenesis of an epithelial sheet (GO:0002011)	53	1	0.34	+	2.98	0.285	1
regulation of phosphoprotein phosphatase activity (GO:0043666)	53	1	0.34	+	2.98	0.285	1
autonomic nervous system development (GO:0048483)	53	1	0.34	+	2.98	0.285	1
ventricular cardiac muscle tissue morphogenesis (GO:0055010)	53	1	0.34	+	2.98	0.285	1
positive regulation of glucose transmembrane transport (GO:0010828)	53	1	0.34	+	2.98	0.285	1
negative regulation of insulin secretion (GO:0046676)	53	1	0.34	+	2.98	0.285	1
actin polymerization or depolymerization (GO:0008154)	53	1	0.34	+	2.98	0.285	1
positive regulation of cytokine production involved in immune response (GO:0002720)	53	1	0.34	+	2.98	0.285	1
respiratory tube development (GO:0030323)	213	4	1.35	+	2.97	0.047	0.771
secretion by cell (GO:0032940)	373	7	2.36	+	2.97	0.00992	0.33
cell cycle phase transition (GO:0044770)	160	3	1.01	+	2.97	0.0817	1
regulation of ion transmembrane transport (GO:0034765)	587	11	3.71	+	2.96	0.00134	0.0898
regulation of cell growth (GO:0001558)	427	8	2.7	+	2.96	0.00604	0.249
inorganic ion transmembrane transport (GO:0098660)	482	9	3.05	+	2.95	0.00374	0.173
regulation of transmembrane transport (GO:0034762)	591	11	3.74	+	2.94	0.00141	0.0932
inorganic cation transmembrane transport (GO:0098662)	430	8	2.72	+	2.94	0.00629	0.257
regulation of growth (GO:0040008)	699	13	4.42	+	2.94	0.000528	0.0445
secretion (GO:0046903)	485	9	3.07	+	2.94	0.00389	0.178
potassium ion transport (GO:0006813)	162	3	1.02	+	2.93	0.0841	1
eye photoreceptor cell differentiation (GO:0001754)	54	1	0.34	+	2.93	0.29	1
regulation of amino acid transport (GO:0051955)	54	1	0.34	+	2.93	0.29	1
presynaptic endocytosis (GO:0140238)	54	1	0.34	+	2.93	0.29	1
positive regulation of smooth muscle cell proliferation (GO:0048661)	108	2	0.68	+	2.93	0.15	1
synaptic vesicle endocytosis (GO:0048488)	54	1	0.34	+	2.93	0.29	1
blood vessel diameter maintenance (GO:0097746)	162	3	1.02	+	2.93	0.0841	1
striated muscle cell development (GO:0055002)	108	2	0.68	+	2.93	0.15	1
endocrine pancreas development (GO:0031018)	54	1	0.34	+	2.93	0.29	1
lipid phosphorylation (GO:0046834)	54	1	0.34	+	2.93	0.29	1
regulation of tube diameter (GO:0035296)	162	3	1.02	+	2.93	0.0841	1
positive regulation of endothelial cell migration (GO:0010595)	108	2	0.68	+	2.93	0.15	1
positive regulation of response to cytokine stimulus (GO:0060760)	54	1	0.34	+	2.93	0.29	1
cellular monovalent inorganic cation homeostasis (GO:0030004)	108	2	0.68	+	2.93	0.15	1
circulatory system development (GO:0072359)	923	17	5.83	+	2.91	8.04e-05	0.0102
phospholipid biosynthetic process (GO:0008654)	163	3	1.03	+	2.91	0.0853	1
regulation of tube size (GO:0035150)	163	3	1.03	+	2.91	0.0853	1
cell recognition (GO:0008037)	326	6	2.06	+	2.91	0.018	0.476
cerebellum development (GO:0021549)	109	2	0.69	+	2.90	0.152	1
regulation of potassium ion transport (GO:0043266)	109	2	0.69	+	2.90	0.152	1
cartilage development (GO:0051216)	164	3	1.04	+	2.89	0.0865	1
positive regulation of ERK1 and ERK2 cascade (GO:0070374)	219	4	1.38	+	2.89	0.0511	0.788
blood vessel morphogenesis (GO:0048514)	439	8	2.78	+	2.88	0.00708	0.256
positive regulation of axon extension (GO:0045773)	55	1	0.35	+	2.88	0.294	1
negative regulation of G protein-coupled receptor signaling pathway (GO:0045744)	55	1	0.35	+	2.88	0.294	1
mesoderm development (GO:0007498)	110	2	0.7	+	2.88	0.154	1
regulation of mononuclear cell migration (GO:0071675)	110	2	0.7	+	2.88	0.154	1
positive regulation of organic acid transport (GO:0032892)	55	1	0.35	+	2.88	0.294	1
regulation of endothelial cell apoptotic process (GO:2000351)	55	1	0.35	+	2.88	0.294	1
regulation of cAMP-mediated signaling (GO:0043949)	55	1	0.35	+	2.88	0.294	1
response to estradiol (GO:0032355)	55	1	0.35	+	2.88	0.294	1
positive regulation of striated muscle cell differentiation (GO:0051155)	55	1	0.35	+	2.88	0.294	1
regulation of long-term synaptic potentiation (GO:1900271)	55	1	0.35	+	2.88	0.294	1
muscle cell development (GO:0055001)	165	3	1.04	+	2.88	0.0877	1
positive regulation of tyrosine phosphorylation of STAT protein (GO:0042531)	55	1	0.35	+	2.88	0.294	1
anatomical structure morphogenesis (GO:0009653)	2260	41	14.29	+	2.87	3.09e-10	1.57e-07
regulation of protein-containing complex assembly (GO:0043254)	441	8	2.79	+	2.87	0.00727	0.262
regulation of actin filament organization (GO:0110053)	276	5	1.74	+	2.87	0.0316	0.622
enzyme linked receptor protein signaling pathway (GO:0007167)	552	10	3.49	+	2.87	0.00281	0.145
vascular process in circulatory system (GO:0003018)	221	4	1.4	+	2.86	0.0525	0.806
regulation of system process (GO:0044057)	610	11	3.86	+	2.85	0.00181	0.108
exocytosis (GO:0006887)	222	4	1.4	+	2.85	0.0532	0.812
regulation of actin filament bundle assembly (GO:0032231)	111	2	0.7	+	2.85	0.156	1
associative learning (GO:0008306)	111	2	0.7	+	2.85	0.156	1
response to metal ion (GO:0010038)	279	5	1.76	+	2.83	0.0329	0.643
regulation of cellular protein localization (GO:1903827)	559	10	3.53	+	2.83	0.00308	0.154
positive regulation of blood pressure (GO:0045777)	56	1	0.35	+	2.82	0.298	1
regulation of granulocyte chemotaxis (GO:0071622)	56	1	0.35	+	2.82	0.298	1
regulation of interferon-gamma production (GO:0032649)	112	2	0.71	+	2.82	0.158	1
positive regulation of stress fiber assembly (GO:0051496)	56	1	0.35	+	2.82	0.298	1
modulation of excitatory postsynaptic potential (GO:0098815)	56	1	0.35	+	2.82	0.298	1
thymus development (GO:0048538)	56	1	0.35	+	2.82	0.298	1
regulation of actin filament depolymerization (GO:0030834)	56	1	0.35	+	2.82	0.298	1
regulation of macrophage activation (GO:0043030)	56	1	0.35	+	2.82	0.298	1
positive regulation of dephosphorylation (GO:0035306)	56	1	0.35	+	2.82	0.298	1
regulation of protein targeting (GO:1903533)	56	1	0.35	+	2.82	0.298	1
positive regulation of receptor signaling pathway via JAK-STAT (GO:0046427)	56	1	0.35	+	2.82	0.298	1
positive regulation of angiogenesis (GO:0045766)	169	3	1.07	+	2.81	0.0926	1
regulation of smooth muscle cell proliferation (GO:0048660)	169	3	1.07	+	2.81	0.0926	1
positive regulation of vasculature development (GO:1904018)	169	3	1.07	+	2.81	0.0926	1
positive regulation of protein-containing complex assembly (GO:0031334)	226	4	1.43	+	2.80	0.0561	0.818
negative regulation of organelle organization (GO:0010639)	339	6	2.14	+	2.80	0.0213	0.512
vesicle budding from membrane (GO:0006900)	57	1	0.36	+	2.78	0.303	1
regulation of neuron differentiation (GO:0045664)	228	4	1.44	+	2.78	0.0575	0.835
regulation of calcium ion transmembrane transport (GO:1903169)	171	3	1.08	+	2.78	0.0951	1
protein O-linked glycosylation (GO:0006493)	57	1	0.36	+	2.78	0.303	1
regulation of meiotic cell cycle (GO:0051445)	57	1	0.36	+	2.78	0.303	1
positive regulation of blood vessel endothelial cell migration (GO:0043536)	57	1	0.36	+	2.78	0.303	1
inner ear morphogenesis (GO:0042472)	114	2	0.72	+	2.78	0.163	1
ureteric bud morphogenesis (GO:0060675)	57	1	0.36	+	2.78	0.303	1
ossification (GO:0001503)	229	4	1.45	+	2.76	0.0583	0.843
regulation of cellular component biogenesis (GO:0044087)	974	17	6.16	+	2.76	0.000153	0.0172
placenta development (GO:0001890)	172	3	1.09	+	2.76	0.0963	1
regulation of actin filament polymerization (GO:0030833)	172	3	1.09	+	2.76	0.0963	1
negative regulation of kinase activity (GO:0033673)	230	4	1.45	+	2.75	0.059	0.849
regulation of cellular response to growth factor stimulus (GO:0090287)	288	5	1.82	+	2.75	0.0369	0.7
eye morphogenesis (GO:0048592)	173	3	1.09	+	2.74	0.0976	1
mesonephric tubule morphogenesis (GO:0072171)	58	1	0.37	+	2.73	0.307	1
neural crest cell migration (GO:0001755)	58	1	0.37	+	2.73	0.307	1
positive regulation of protein polymerization (GO:0032273)	116	2	0.73	+	2.73	0.167	1
regulation of myelination (GO:0031641)	58	1	0.37	+	2.73	0.307	1
regulation of substrate adhesion-dependent cell spreading (GO:1900024)	58	1	0.37	+	2.73	0.307	1
negative regulation of muscle cell apoptotic process (GO:0010656)	58	1	0.37	+	2.73	0.307	1
regulation of phospholipase activity (GO:0010517)	58	1	0.37	+	2.73	0.307	1
regulation of membrane lipid distribution (GO:0097035)	58	1	0.37	+	2.73	0.307	1
cation transmembrane transport (GO:0098655)	465	8	2.94	+	2.72	0.0098	0.326
cell surface receptor signaling pathway involved in cell-cell signaling (GO:1905114)	291	5	1.84	+	2.72	0.0382	0.684
positive regulation of stress-activated MAPK cascade (GO:0032874)	117	2	0.74	+	2.70	0.169	1
regulation of amine transport (GO:0051952)	117	2	0.74	+	2.70	0.169	1
regulation of neural precursor cell proliferation (GO:2000177)	117	2	0.74	+	2.70	0.169	1
cell-substrate adhesion (GO:0031589)	176	3	1.11	+	2.70	0.101	1
lung morphogenesis (GO:0060425)	59	1	0.37	+	2.68	0.312	1
cellular response to catecholamine stimulus (GO:0071870)	59	1	0.37	+	2.68	0.312	1
cellular response to monoamine stimulus (GO:0071868)	59	1	0.37	+	2.68	0.312	1
positive regulation of cell-matrix adhesion (GO:0001954)	59	1	0.37	+	2.68	0.312	1
long-term synaptic potentiation (GO:0060291)	59	1	0.37	+	2.68	0.312	1
positive regulation of lipase activity (GO:0060193)	59	1	0.37	+	2.68	0.312	1
negative regulation of smooth muscle cell proliferation (GO:0048662)	59	1	0.37	+	2.68	0.312	1
aorta development (GO:0035904)	59	1	0.37	+	2.68	0.312	1
regulation of carbohydrate catabolic process (GO:0043470)	59	1	0.37	+	2.68	0.312	1
membrane lipid biosynthetic process (GO:0046467)	118	2	0.75	+	2.68	0.172	1
cell aging (GO:0007569)	59	1	0.37	+	2.68	0.312	1
transmembrane receptor protein tyrosine kinase signaling pathway (GO:0007169)	357	6	2.26	+	2.66	0.0266	0.577
Notch signaling pathway (GO:0007219)	119	2	0.75	+	2.66	0.174	1
positive regulation of stress-activated protein kinase signaling cascade (GO:0070304)	119	2	0.75	+	2.66	0.174	1
female sex differentiation (GO:0046660)	119	2	0.75	+	2.66	0.174	1
positive regulation of growth (GO:0045927)	298	5	1.88	+	2.65	0.0416	0.729
regulation of cation channel activity (GO:2001257)	179	3	1.13	+	2.65	0.105	1
positive regulation of hydrolase activity (GO:0051345)	537	9	3.39	+	2.65	0.0074	0.264
negative regulation of ion transport (GO:0043271)	359	6	2.27	+	2.64	0.0272	0.586
regulation of secretion by cell (GO:1903530)	659	11	4.17	+	2.64	0.00327	0.157
face development (GO:0060324)	60	1	0.38	+	2.64	0.316	1
response to catecholamine (GO:0071869)	60	1	0.38	+	2.64	0.316	1
response to monoamine (GO:0071867)	60	1	0.38	+	2.64	0.316	1
cell-cell junction organization (GO:0045216)	180	3	1.14	+	2.64	0.107	1
regulation of lymphocyte migration (GO:2000401)	60	1	0.38	+	2.64	0.316	1
positive regulation of ion transmembrane transporter activity (GO:0032414)	120	2	0.76	+	2.64	0.176	1
digestive tract development (GO:0048565)	120	2	0.76	+	2.64	0.176	1
regulation of receptor-mediated endocytosis (GO:0048259)	120	2	0.76	+	2.64	0.176	1
regulation of vascular associated smooth muscle cell proliferation (GO:1904705)	60	1	0.38	+	2.64	0.316	1
photoreceptor cell development (GO:0042461)	60	1	0.38	+	2.64	0.316	1
labyrinthine layer development (GO:0060711)	60	1	0.38	+	2.64	0.316	1
positive regulation of mitotic cell cycle (GO:0045931)	120	2	0.76	+	2.64	0.176	1
positive regulation of regulated secretory pathway (GO:1903307)	60	1	0.38	+	2.64	0.316	1
regulation of multicellular organismal development (GO:2000026)	1446	24	9.14	+	2.63	1.33e-05	0.00214
respiratory system development (GO:0060541)	241	4	1.52	+	2.63	0.0676	0.904
regulation of localization (GO:0032879)	2837	47	17.93	+	2.62	2e-10	1.05e-07
metencephalon development (GO:0022037)	121	2	0.76	+	2.61	0.178	1
regulation of leukocyte chemotaxis (GO:0002688)	121	2	0.76	+	2.61	0.178	1
animal organ morphogenesis (GO:0009887)	1029	17	6.5	+	2.61	0.00029	0.0273
response to ketone (GO:1901654)	122	2	0.77	+	2.59	0.181	1
positive regulation of receptor signaling pathway via STAT (GO:1904894)	61	1	0.39	+	2.59	0.32	1
positive regulation of receptor-mediated endocytosis (GO:0048260)	61	1	0.39	+	2.59	0.32	1
glycolipid biosynthetic process (GO:0009247)	61	1	0.39	+	2.59	0.32	1
myeloid leukocyte migration (GO:0097529)	122	2	0.77	+	2.59	0.181	1
regulation of embryonic development (GO:0045995)	61	1	0.39	+	2.59	0.32	1
epithelial tube morphogenesis (GO:0060562)	367	6	2.32	+	2.59	0.0298	0.626
regulation of secretion (GO:0051046)	736	12	4.65	+	2.58	0.00259	0.14
regulation of cell-matrix adhesion (GO:0001952)	123	2	0.78	+	2.57	0.183	1
negative regulation of transport (GO:0051051)	492	8	3.11	+	2.57	0.0134	0.382
positive regulation of cell growth (GO:0030307)	185	3	1.17	+	2.57	0.113	1
positive regulation of ion transmembrane transport (GO:0034767)	247	4	1.56	+	2.56	0.0725	0.952
positive regulation of transmembrane transport (GO:0034764)	247	4	1.56	+	2.56	0.0725	0.951
negative regulation of cell differentiation (GO:0045596)	681	11	4.31	+	2.56	0.00417	0.19
regulation of myoblast differentiation (GO:0045661)	62	1	0.39	+	2.55	0.325	1
regulation of pathway-restricted SMAD protein phosphorylation (GO:0060393)	62	1	0.39	+	2.55	0.325	1
heart looping (GO:0001947)	62	1	0.39	+	2.55	0.325	1
cell-cell junction assembly (GO:0007043)	124	2	0.78	+	2.55	0.185	1
positive regulation of interleukin-1 production (GO:0032732)	62	1	0.39	+	2.55	0.325	1
regulation of transmembrane receptor protein serine/threonine kinase signaling pathway (GO:0090092)	248	4	1.57	+	2.55	0.0733	0.943
synaptic vesicle recycling (GO:0036465)	62	1	0.39	+	2.55	0.325	1
negative regulation of muscle cell differentiation (GO:0051148)	62	1	0.39	+	2.55	0.325	1
negative regulation of cellular component organization (GO:0051129)	744	12	4.7	+	2.55	0.00283	0.145
negative regulation of small GTPase mediated signal transduction (GO:0051058)	62	1	0.39	+	2.55	0.325	1
regulation of bone remodeling (GO:0046850)	62	1	0.39	+	2.55	0.325	1
ventricular cardiac muscle tissue development (GO:0003229)	62	1	0.39	+	2.55	0.325	1
negative regulation of anion transport (GO:1903792)	249	4	1.57	+	2.54	0.0742	0.953
response to drug (GO:0042493)	250	4	1.58	+	2.53	0.075	0.959
cellular response to organic cyclic compound (GO:0071407)	377	6	2.38	+	2.52	0.0333	0.651
embryo development (GO:0009790)	1196	19	7.56	+	2.51	0.000205	0.0205
regulation of cellular component organization (GO:0051128)	2455	39	15.52	+	2.51	3.88e-08	1.09e-05
response to ethanol (GO:0045471)	63	1	0.4	+	2.51	0.329	1
inner ear receptor cell development (GO:0060119)	63	1	0.4	+	2.51	0.329	1
regulation of CD4-positive, alpha-beta T cell activation (GO:2000514)	63	1	0.4	+	2.51	0.329	1
positive regulation of nuclear division (GO:0051785)	63	1	0.4	+	2.51	0.329	1
actin filament bundle organization (GO:0061572)	63	1	0.4	+	2.51	0.329	1
positive regulation of dendritic spine development (GO:0060999)	63	1	0.4	+	2.51	0.329	1
muscle contraction (GO:0006936)	189	3	1.19	+	2.51	0.119	1
response to organic cyclic compound (GO:0014070)	630	10	3.98	+	2.51	0.00699	0.254
regulation of cell differentiation (GO:0045595)	1581	25	9.99	+	2.50	1.94e-05	0.00293
regulation of actin polymerization or depolymerization (GO:0008064)	190	3	1.2	+	2.50	0.12	1
inorganic anion transport (GO:0015698)	127	2	0.8	+	2.49	0.192	1
tube development (GO:0035295)	956	15	6.04	+	2.48	0.00112	0.0778
adenylate cyclase-activating G protein-coupled receptor signaling pathway (GO:0007189)	128	2	0.81	+	2.47	0.194	1
positive regulation of transporter activity (GO:0032411)	128	2	0.81	+	2.47	0.194	1
regulation of actin filament length (GO:0030832)	193	3	1.22	+	2.46	0.124	1
actin filament-based process (GO:0030029)	581	9	3.67	+	2.45	0.0119	0.379
regulation of developmental process (GO:0050793)	2521	39	15.94	+	2.45	7.9e-08	2.01e-05
protein autophosphorylation (GO:0046777)	194	3	1.23	+	2.45	0.126	1
actin filament organization (GO:0007015)	259	4	1.64	+	2.44	0.0829	1
positive regulation of MAPK cascade (GO:0043410)	518	8	3.27	+	2.44	0.0177	0.472
positive regulation of mononuclear cell migration (GO:0071677)	65	1	0.41	+	2.43	0.337	1
regulation of lipid catabolic process (GO:0050994)	65	1	0.41	+	2.43	0.337	1
rhythmic process (GO:0048511)	260	4	1.64	+	2.43	0.0838	1
mitotic cytokinesis (GO:0000281)	65	1	0.41	+	2.43	0.337	1
regulation of circadian rhythm (GO:0042752)	130	2	0.82	+	2.43	0.199	1
lipid biosynthetic process (GO:0008610)	458	7	2.9	+	2.42	0.027	0.583
leukocyte chemotaxis (GO:0030595)	131	2	0.83	+	2.42	0.201	1
regulation of JNK cascade (GO:0046328)	131	2	0.83	+	2.42	0.201	1
regulation of protein localization (GO:0032880)	920	14	5.82	+	2.41	0.00218	0.122
negative regulation of transferase activity (GO:0051348)	263	4	1.66	+	2.41	0.0865	1
transmission of nerve impulse (GO:0019226)	66	1	0.42	+	2.40	0.342	1
sphingolipid metabolic process (GO:0006665)	132	2	0.83	+	2.40	0.203	1
apoptotic mitochondrial changes (GO:0008637)	66	1	0.42	+	2.40	0.342	1
regulation of alpha-beta T cell differentiation (GO:0046637)	66	1	0.42	+	2.40	0.342	1
glucose homeostasis (GO:0042593)	198	3	1.25	+	2.40	0.131	1
regulation of vesicle-mediated transport (GO:0060627)	595	9	3.76	+	2.39	0.0138	0.39
positive regulation of secretion (GO:0051047)	397	6	2.51	+	2.39	0.0411	0.724
carbohydrate homeostasis (GO:0033500)	199	3	1.26	+	2.38	0.133	1
cation transport (GO:0006812)	731	11	4.62	+	2.38	0.00698	0.254
negative regulation of reproductive process (GO:2000242)	67	1	0.42	+	2.36	0.346	1
positive regulation of NIK/NF-kappaB signaling (GO:1901224)	67	1	0.42	+	2.36	0.346	1
regulation of catecholamine secretion (GO:0050433)	67	1	0.42	+	2.36	0.346	1
tube morphogenesis (GO:0035239)	737	11	4.66	+	2.36	0.00739	0.264
regulation of peptide secretion (GO:0002791)	335	5	2.12	+	2.36	0.0624	0.869
positive regulation of myeloid leukocyte differentiation (GO:0002763)	67	1	0.42	+	2.36	0.346	1
cell chemotaxis (GO:0060326)	202	3	1.28	+	2.35	0.137	1
negative regulation of ion transmembrane transport (GO:0034766)	135	2	0.85	+	2.34	0.21	1
positive regulation of developmental process (GO:0051094)	1419	21	8.97	+	2.34	0.000243	0.0236
blood vessel development (GO:0001568)	541	8	3.42	+	2.34	0.0222	0.531
cell surface receptor signaling pathway (GO:0007166)	1903	28	12.03	+	2.33	2.1e-05	0.00312
SMAD protein signal transduction (GO:0060395)	68	1	0.43	+	2.33	0.35	1
adenylate cyclase-modulating G protein-coupled receptor signaling pathway (GO:0007188)	204	3	1.29	+	2.33	0.14	1
nephron tubule morphogenesis (GO:0072078)	68	1	0.43	+	2.33	0.35	1
positive regulation of chemokine production (GO:0032722)	68	1	0.43	+	2.33	0.35	1
regulation of lymphocyte apoptotic process (GO:0070228)	68	1	0.43	+	2.33	0.35	1
positive regulation of fibroblast proliferation (GO:0048146)	68	1	0.43	+	2.33	0.35	1
cytoplasmic microtubule organization (GO:0031122)	68	1	0.43	+	2.33	0.35	1
negative regulation of transmembrane transport (GO:0034763)	136	2	0.86	+	2.33	0.213	1
determination of heart left/right asymmetry (GO:0061371)	68	1	0.43	+	2.33	0.35	1
response to growth factor (GO:0070848)	410	6	2.59	+	2.31	0.0468	0.769
cell differentiation (GO:0030154)	3560	52	22.51	+	2.31	1.33e-09	5.11e-07
regulation of ion transport (GO:0043269)	1370	20	8.66	+	2.31	0.000412	0.036
phosphatidylinositol metabolic process (GO:0046488)	137	2	0.87	+	2.31	0.215	1
blood circulation (GO:0008015)	412	6	2.6	+	2.30	0.0477	0.779
vesicle cytoskeletal trafficking (GO:0099518)	69	1	0.44	+	2.29	0.354	1
regulation of transport (GO:0051049)	1863	27	11.78	+	2.29	3.94e-05	0.00554
regulation of Rho protein signal transduction (GO:0035023)	138	2	0.87	+	2.29	0.217	1
myotube differentiation (GO:0014902)	69	1	0.44	+	2.29	0.354	1
positive regulation of secretion by cell (GO:1903532)	345	5	2.18	+	2.29	0.0689	0.916
regulation of epidermal growth factor receptor signaling pathway (GO:0042058)	69	1	0.44	+	2.29	0.354	1
embryonic heart tube morphogenesis (GO:0003143)	69	1	0.44	+	2.29	0.354	1
cellular developmental process (GO:0048869)	3611	52	22.83	+	2.28	2.21e-09	7.72e-07
tissue development (GO:0009888)	1675	24	10.59	+	2.27	0.000135	0.0155
diencephalon development (GO:0021536)	70	1	0.44	+	2.26	0.358	1
circadian regulation of gene expression (GO:0032922)	70	1	0.44	+	2.26	0.358	1
myeloid cell homeostasis (GO:0002262)	140	2	0.89	+	2.26	0.222	1
nephron epithelium morphogenesis (GO:0072088)	70	1	0.44	+	2.26	0.358	1
chondrocyte differentiation (GO:0002062)	70	1	0.44	+	2.26	0.358	1
regulation of interleukin-8 production (GO:0032677)	70	1	0.44	+	2.26	0.358	1
regulation of morphogenesis of an epithelium (GO:1905330)	70	1	0.44	+	2.26	0.358	1
positive regulation of Ras protein signal transduction (GO:0046579)	70	1	0.44	+	2.26	0.358	1
regulation of cartilage development (GO:0061035)	70	1	0.44	+	2.26	0.358	1
negative regulation of protein phosphorylation (GO:0001933)	350	5	2.21	+	2.26	0.0723	0.95
regulation of nuclear division (GO:0051783)	141	2	0.89	+	2.24	0.224	1
negative regulation of protein transport (GO:0051224)	141	2	0.89	+	2.24	0.224	1
organelle localization (GO:0051640)	495	7	3.13	+	2.24	0.0386	0.69
oligodendrocyte differentiation (GO:0048709)	71	1	0.45	+	2.23	0.362	1
proteoglycan metabolic process (GO:0006029)	71	1	0.45	+	2.23	0.362	1
negative regulation of MAP kinase activity (GO:0043407)	71	1	0.45	+	2.23	0.362	1
embryonic digit morphogenesis (GO:0042733)	71	1	0.45	+	2.23	0.362	1
regulation of tyrosine phosphorylation of STAT protein (GO:0042509)	71	1	0.45	+	2.23	0.362	1
visual learning (GO:0008542)	71	1	0.45	+	2.23	0.362	1
myeloid cell development (GO:0061515)	71	1	0.45	+	2.23	0.362	1
embryonic organ development (GO:0048568)	498	7	3.15	+	2.22	0.0397	0.702
cellular response to molecule of bacterial origin (GO:0071219)	214	3	1.35	+	2.22	0.154	1
vasculature development (GO:0001944)	571	8	3.61	+	2.22	0.0293	0.619
monovalent inorganic cation homeostasis (GO:0055067)	143	2	0.9	+	2.21	0.229	1
system development (GO:0048731)	4176	58	26.4	+	2.20	5.79e-10	2.68e-07
response to inorganic substance (GO:0010035)	432	6	2.73	+	2.20	0.0574	0.834
small GTPase mediated signal transduction (GO:0007264)	216	3	1.37	+	2.20	0.157	1
protein autoubiquitination (GO:0051865)	72	1	0.46	+	2.20	0.366	1
positive regulation of muscle cell differentiation (GO:0051149)	72	1	0.46	+	2.20	0.366	1
cranial skeletal system development (GO:1904888)	72	1	0.46	+	2.20	0.366	1
phosphatidylinositol-mediated signaling (GO:0048015)	72	1	0.46	+	2.20	0.366	1
regulation of gene silencing (GO:0060968)	72	1	0.46	+	2.20	0.366	1
protein polyubiquitination (GO:0000209)	217	3	1.37	+	2.19	0.159	1
protein phosphorylation (GO:0006468)	652	9	4.12	+	2.18	0.0233	0.554
establishment of vesicle localization (GO:0051650)	145	2	0.92	+	2.18	0.234	1
regulation of angiogenesis (GO:0045765)	291	4	1.84	+	2.17	0.114	1
regulation of hydrolase activity (GO:0051336)	1020	14	6.45	+	2.17	0.00541	0.228
regulation of fat cell differentiation (GO:0045598)	146	2	0.92	+	2.17	0.236	1
regulation of intracellular pH (GO:0051453)	73	1	0.46	+	2.17	0.37	1
negative regulation of establishment of protein localization (GO:1904950)	146	2	0.92	+	2.17	0.236	1
photoreceptor cell differentiation (GO:0046530)	73	1	0.46	+	2.17	0.37	1
connective tissue development (GO:0061448)	219	3	1.38	+	2.17	0.162	1
animal organ development (GO:0048513)	3146	43	19.89	+	2.16	4.47e-07	0.000105
negative regulation of developmental process (GO:0051093)	952	13	6.02	+	2.16	0.00759	0.269
regulation of cell adhesion (GO:0030155)	733	10	4.63	+	2.16	0.0185	0.486
positive regulation of cell adhesion (GO:0045785)	441	6	2.79	+	2.15	0.0621	0.865
regulation of vasculature development (GO:1901342)	295	4	1.86	+	2.14	0.118	1
cellular response to endogenous stimulus (GO:0071495)	885	12	5.59	+	2.14	0.0107	0.351
circulatory system process (GO:0003013)	443	6	2.8	+	2.14	0.0632	0.874
hippocampus development (GO:0021766)	74	1	0.47	+	2.14	0.374	1
regulation of receptor internalization (GO:0002090)	74	1	0.47	+	2.14	0.374	1
positive regulation of organelle assembly (GO:1902117)	74	1	0.47	+	2.14	0.374	1
neuron fate commitment (GO:0048663)	74	1	0.47	+	2.14	0.374	1
regulation of ERBB signaling pathway (GO:1901184)	74	1	0.47	+	2.14	0.374	1
regulation of protein secretion (GO:0050708)	296	4	1.87	+	2.14	0.119	1
striated muscle cell differentiation (GO:0051146)	222	3	1.4	+	2.14	0.167	1
regulation of cyclin-dependent protein serine/threonine kinase activity (GO:0000079)	74	1	0.47	+	2.14	0.374	1
morphogenesis of an epithelium (GO:0002009)	519	7	3.28	+	2.13	0.0476	0.778
positive regulation of multicellular organismal process (GO:0051240)	1565	21	9.89	+	2.12	0.00087	0.0649
multicellular organism development (GO:0007275)	4788	64	30.27	+	2.11	1.91e-10	1.04e-07
in utero embryonic development (GO:0001701)	525	7	3.32	+	2.11	0.0501	0.78
visual behavior (GO:0007632)	75	1	0.47	+	2.11	0.378	1
negative regulation of response to external stimulus (GO:0032102)	377	5	2.38	+	2.10	0.092	1
cellular localization (GO:0051641)	2192	29	13.86	+	2.09	9.96e-05	0.0122
regulation of biological quality (GO:0065008)	3935	52	24.88	+	2.09	4.31e-08	1.19e-05
positive regulation of JUN kinase activity (GO:0043507)	76	1	0.48	+	2.08	0.382	1
inositol lipid-mediated signaling (GO:0048017)	76	1	0.48	+	2.08	0.382	1
regulation of cell shape (GO:0008360)	152	2	0.96	+	2.08	0.25	1
phosphorylation (GO:0016310)	914	12	5.78	+	2.08	0.0135	0.386
cellular response to oxygen-containing compound (GO:1901701)	920	12	5.82	+	2.06	0.0142	0.396
positive regulation of phosphatidylinositol 3-kinase signaling (GO:0014068)	77	1	0.49	+	2.05	0.386	1
positive regulation of gliogenesis (GO:0014015)	77	1	0.49	+	2.05	0.386	1
peptidyl-threonine phosphorylation (GO:0018107)	77	1	0.49	+	2.05	0.386	1
positive regulation of small GTPase mediated signal transduction (GO:0051057)	77	1	0.49	+	2.05	0.386	1
regulation of insulin receptor signaling pathway (GO:0046626)	77	1	0.49	+	2.05	0.386	1
positive regulation of epithelial cell migration (GO:0010634)	155	2	0.98	+	2.04	0.257	1
negative regulation of multicellular organismal process (GO:0051241)	1087	14	6.87	+	2.04	0.00922	0.311
regulation of cellular localization (GO:0060341)	856	11	5.41	+	2.03	0.0205	0.499
activation of cysteine-type endopeptidase activity involved in apoptotic process (GO:0006919)	78	1	0.49	+	2.03	0.39	1
cellular response to calcium ion (GO:0071277)	78	1	0.49	+	2.03	0.39	1
regulation of cellular response to insulin stimulus (GO:1900076)	78	1	0.49	+	2.03	0.39	1
regulation of cyclin-dependent protein kinase activity (GO:1904029)	78	1	0.49	+	2.03	0.39	1
positive regulation of response to biotic stimulus (GO:0002833)	156	2	0.99	+	2.03	0.259	1
cardiac ventricle morphogenesis (GO:0003208)	78	1	0.49	+	2.03	0.39	1
positive regulation of transport (GO:0051050)	1015	13	6.42	+	2.03	0.0125	0.39
tissue morphogenesis (GO:0048729)	625	8	3.95	+	2.02	0.0458	0.755
regulation of ERK1 and ERK2 cascade (GO:0070372)	313	4	1.98	+	2.02	0.138	1
positive regulation of protein secretion (GO:0050714)	157	2	0.99	+	2.02	0.261	1
response to temperature stimulus (GO:0009266)	157	2	0.99	+	2.02	0.261	1
cell population proliferation (GO:0008283)	550	7	3.48	+	2.01	0.0611	0.869
glycoprotein biosynthetic process (GO:0009101)	236	3	1.49	+	2.01	0.188	1
regulation of organelle organization (GO:0033043)	1182	15	7.47	+	2.01	0.00808	0.278
anatomical structure formation involved in morphogenesis (GO:0048646)	947	12	5.99	+	2.00	0.0174	0.466
regulation of lipase activity (GO:0060191)	79	1	0.5	+	2.00	0.394	1
positive regulation of cell division (GO:0051781)	79	1	0.5	+	2.00	0.394	1
protein tetramerization (GO:0051262)	79	1	0.5	+	2.00	0.394	1
[truncated: 13,746 more rows]

## Sheet: HighScore Dorsal A cells GO
go	ref	obs	expected	pos.neg	fold.enrich	raw.p.value	fdr
negative regulation of elastin catabolic process (GO:0060311)	1	1	0	+	> 100	0.0039	0.161
regulation of elastin catabolic process (GO:0060310)	1	1	0	+	> 100	0.0039	0.161
VEGF-activated neuropilin signaling pathway involved in axon guidance (GO:1902378)	1	1	0	+	> 100	0.0039	0.16
glutamate decarboxylation to succinate (GO:0006540)	1	1	0	+	> 100	0.0039	0.16
cytoskeletal matrix organization at active zone (GO:0048789)	1	1	0	+	> 100	0.0039	0.16
cardiac endothelial to mesenchymal transition (GO:0140074)	1	1	0	+	> 100	0.0039	0.159
protein-containing complex assembly involved in synapse maturation (GO:0090126)	1	1	0	+	> 100	0.0039	0.159
positive regulation of presynapse assembly (GO:1905608)	1	1	0	+	> 100	0.0039	0.158
positive regulation of presynaptic active zone assembly (GO:1905520)	1	1	0	+	> 100	0.0039	0.158
regulation of presynaptic active zone assembly (GO:1905518)	1	1	0	+	> 100	0.0039	0.158
sensory neuron migration (GO:1904937)	1	1	0	+	> 100	0.0039	0.157
positive regulation of glutamatergic neuron differentiation (GO:0120008)	1	1	0	+	> 100	0.0039	0.157
regulation of glutamatergic neuron differentiation (GO:0120006)	1	1	0	+	> 100	0.0039	0.156
negative regulation of neuron remodeling (GO:1904800)	1	1	0	+	> 100	0.0039	0.156
regulation of neuron remodeling (GO:1904799)	1	1	0	+	> 100	0.0039	0.156
otic placode development (GO:1905040)	1	1	0	+	> 100	0.0039	0.155
seminal vesicle morphogenesis (GO:0061682)	1	1	0	+	> 100	0.0039	0.155
defecation (GO:0030421)	1	1	0	+	> 100	0.0039	0.154
negative regulation of skeletal muscle hypertrophy (GO:1904205)	1	1	0	+	> 100	0.0039	0.154
renal artery morphogenesis (GO:0061441)	1	1	0	+	> 100	0.0039	0.154
response to fungicide (GO:0060992)	1	1	0	+	> 100	0.0039	0.153
cell migration involved in coronary vasculogenesis (GO:0060980)	1	1	0	+	> 100	0.0039	0.153
pancreatic A cell development (GO:0003322)	1	1	0	+	> 100	0.0039	0.153
neurexin clustering involved in presynaptic membrane assembly (GO:0097115)	1	1	0	+	> 100	0.0039	0.152
forebrain-midbrain boundary formation (GO:0021905)	1	1	0	+	> 100	0.0039	0.152
cell-cell adhesion involved in neuronal-glial interactions involved in cerebral cortex radial glia guided migration (GO:0021813)	1	1	0	+	> 100	0.0039	0.151
negative regulation of integrin biosynthetic process (GO:0045720)	2	1	0.01	+	> 100	0.00779	0.258
globus pallidus development (GO:0021759)	2	1	0.01	+	> 100	0.00779	0.258
vestibulocochlear nerve structural organization (GO:0021649)	2	1	0.01	+	> 100	0.00779	0.257
cerebellum structural organization (GO:0021589)	2	1	0.01	+	> 100	0.00779	0.257
hindbrain structural organization (GO:0021577)	2	1	0.01	+	> 100	0.00779	0.256
VEGF-activated neuropilin signaling pathway (GO:0038190)	2	1	0.01	+	> 100	0.00779	0.256
canonical Wnt signaling pathway involved in positive regulation of epithelial to mesenchymal transition (GO:0044334)	2	1	0.01	+	> 100	0.00779	0.255
glial cell projection elongation (GO:0106091)	2	1	0.01	+	> 100	0.00779	0.255
adrenal cortex formation (GO:0035802)	2	1	0.01	+	> 100	0.00779	0.254
dorsal root ganglion morphogenesis (GO:1904835)	2	1	0.01	+	> 100	0.00779	0.253
ganglion morphogenesis (GO:0061552)	2	1	0.01	+	> 100	0.00779	0.253
guanylate kinase-associated protein clustering (GO:0097117)	2	1	0.01	+	> 100	0.00779	0.252
seminal vesicle development (GO:0061107)	2	1	0.01	+	> 100	0.00779	0.252
adrenal chromaffin cell differentiation (GO:0061104)	2	1	0.01	+	> 100	0.00779	0.251
protein localization to early endosome (GO:1902946)	2	1	0.01	+	> 100	0.00779	0.251
embryonic olfactory bulb interneuron precursor migration (GO:0021831)	2	1	0.01	+	> 100	0.00779	0.25
neuronal-glial interaction involved in cerebral cortex radial glia guided migration (GO:0021812)	2	1	0.01	+	> 100	0.00779	0.25
intestinal epithelial cell maturation (GO:0060574)	2	1	0.01	+	> 100	0.00779	0.249
glial cell fate specification (GO:0021780)	5	2	0.02	+	> 100	0.000187	0.0153
oligodendrocyte cell fate commitment (GO:0021779)	5	2	0.02	+	> 100	0.000187	0.0152
oligodendrocyte cell fate specification (GO:0021778)	5	2	0.02	+	> 100	0.000187	0.0151
dichotomous subdivision of terminal units involved in salivary gland branching (GO:0060666)	5	2	0.02	+	> 100	0.000187	0.0151
cerebral cortex regionalization (GO:0021796)	9	3	0.04	+	85.22	6.84e-06	0.00103
rhombomere morphogenesis (GO:0021593)	3	1	0.01	+	85.22	0.0117	0.339
epithalamus development (GO:0021538)	3	1	0.01	+	85.22	0.0117	0.338
neural fold elevation formation (GO:0021502)	3	1	0.01	+	85.22	0.0117	0.338
neuropilin signaling pathway (GO:0038189)	3	1	0.01	+	85.22	0.0117	0.337
positive regulation of retinal ganglion cell axon guidance (GO:1902336)	3	1	0.01	+	85.22	0.0117	0.336
negative regulation of female gonad development (GO:2000195)	3	1	0.01	+	85.22	0.0117	0.336
positive regulation of inflammatory response to wounding (GO:0106016)	3	1	0.01	+	85.22	0.0117	0.335
positive regulation of blood vessel branching (GO:1905555)	3	1	0.01	+	85.22	0.0117	0.335
adrenal cortex development (GO:0035801)	3	1	0.01	+	85.22	0.0117	0.334
positive regulation of cardiac neural crest cell migration involved in outflow tract morphogenesis (GO:1905312)	3	1	0.01	+	85.22	0.0117	0.333
regulation of cardiac neural crest cell migration involved in outflow tract morphogenesis (GO:1905310)	3	1	0.01	+	85.22	0.0117	0.333
positive regulation of chemokine-mediated signaling pathway (GO:0070101)	3	1	0.01	+	85.22	0.0117	0.332
gamma-aminobutyric acid biosynthetic process (GO:0009449)	3	1	0.01	+	85.22	0.0117	0.332
positive regulation of mini excitatory postsynaptic potential (GO:0061885)	3	1	0.01	+	85.22	0.0117	0.331
peptidoglycan transport (GO:0015835)	3	1	0.01	+	85.22	0.0117	0.33
positive regulation of heparan sulfate proteoglycan biosynthetic process (GO:0010909)	3	1	0.01	+	85.22	0.0117	0.33
regulation of heparan sulfate proteoglycan biosynthetic process (GO:0010908)	3	1	0.01	+	85.22	0.0117	0.329
basal dendrite arborization (GO:0150020)	3	1	0.01	+	85.22	0.0117	0.329
basal dendrite morphogenesis (GO:0150019)	3	1	0.01	+	85.22	0.0117	0.328
basal dendrite development (GO:0150018)	3	1	0.01	+	85.22	0.0117	0.327
lateral motor column neuron migration (GO:0097477)	3	1	0.01	+	85.22	0.0117	0.327
motor neuron migration (GO:0097475)	6	2	0.02	+	85.22	0.000268	0.02
regulation of skeletal muscle hypertrophy (GO:1904204)	3	1	0.01	+	85.22	0.0117	0.326
sensory neuron axon guidance (GO:0097374)	3	1	0.01	+	85.22	0.0117	0.326
noradrenergic neuron development (GO:0003358)	3	1	0.01	+	85.22	0.0117	0.325
pulmonary myocardium development (GO:0003350)	3	1	0.01	+	85.22	0.0117	0.325
prostate gland stromal morphogenesis (GO:0060741)	3	1	0.01	+	85.22	0.0117	0.324
postsynaptic density protein 95 clustering (GO:0097119)	6	2	0.02	+	85.22	0.000268	0.0199
NMDA glutamate receptor clustering (GO:0097114)	6	2	0.02	+	85.22	0.000268	0.0198
habenula development (GO:0021986)	3	1	0.01	+	85.22	0.0117	0.323
spinal cord ventral commissure morphogenesis (GO:0021965)	3	1	0.01	+	85.22	0.0117	0.323
right ventricular cardiac muscle tissue morphogenesis (GO:0003221)	3	1	0.01	+	85.22	0.0117	0.322
facioacoustic ganglion development (GO:1903375)	3	1	0.01	+	85.22	0.0117	0.322
olfactory bulb mitral cell layer development (GO:0061034)	3	1	0.01	+	85.22	0.0117	0.321
positive regulation of axon extension involved in axon guidance (GO:0048842)	7	2	0.03	+	73.05	0.000364	0.0256
pancreatic A cell differentiation (GO:0003310)	7	2	0.03	+	73.05	0.000364	0.0255
iris morphogenesis (GO:0061072)	7	2	0.03	+	73.05	0.000364	0.0254
cytokine production involved in inflammatory response (GO:0002534)	4	1	0.02	+	63.92	0.0155	0.398
positive regulation of axon guidance (GO:1902669)	4	1	0.02	+	63.92	0.0155	0.397
dorsal/ventral axon guidance (GO:0033563)	4	1	0.02	+	63.92	0.0155	0.397
lactate biosynthetic process from pyruvate (GO:0019244)	4	1	0.02	+	63.92	0.0155	0.396
positive regulation of mesenchymal stem cell differentiation (GO:2000741)	4	1	0.02	+	63.92	0.0155	0.396
negative regulation of cell proliferation involved in contact inhibition (GO:0060244)	4	1	0.02	+	63.92	0.0155	0.395
positive regulation of smooth muscle cell chemotaxis (GO:0071673)	4	1	0.02	+	63.92	0.0155	0.394
post-embryonic retina morphogenesis in camera-type eye (GO:0060060)	4	1	0.02	+	63.92	0.0155	0.394
nodal signaling pathway involved in determination of left/right asymmetry (GO:0038107)	4	1	0.02	+	63.92	0.0155	0.393
negative regulation of neuron maturation (GO:0014043)	4	1	0.02	+	63.92	0.0155	0.392
columnar/cuboidal epithelial cell maturation (GO:0002069)	4	1	0.02	+	63.92	0.0155	0.392
L-aspartate transmembrane transport (GO:0070778)	4	1	0.02	+	63.92	0.0155	0.391
negative regulation of branching morphogenesis of a nerve (GO:2000173)	4	1	0.02	+	63.92	0.0155	0.39
L-aspartate import across plasma membrane (GO:0140009)	4	1	0.02	+	63.92	0.0155	0.39
positive regulation of male gonad development (GO:2000020)	8	2	0.03	+	63.92	0.000474	0.031
myoblast fate commitment (GO:0048625)	4	1	0.02	+	63.92	0.0155	0.389
embryonic hindgut morphogenesis (GO:0048619)	4	1	0.02	+	63.92	0.0155	0.389
negative regulation of inflammatory response to wounding (GO:0106015)	4	1	0.02	+	63.92	0.0155	0.388
regulation of blood vessel branching (GO:1905553)	4	1	0.02	+	63.92	0.0155	0.387
ventral trunk neural crest cell migration (GO:0036486)	4	1	0.02	+	63.92	0.0155	0.387
trunk neural crest cell migration (GO:0036484)	4	1	0.02	+	63.92	0.0155	0.386
regulation of mini excitatory postsynaptic potential (GO:0061884)	4	1	0.02	+	63.92	0.0155	0.386
positive regulation of microtubule depolymerization (GO:0031117)	4	1	0.02	+	63.92	0.0155	0.385
positive regulation of cell fate specification (GO:0042660)	4	1	0.02	+	63.92	0.0155	0.384
nodal signaling pathway involved in determination of lateral mesoderm left/right asymmetry (GO:1900164)	4	1	0.02	+	63.92	0.0155	0.384
cell migration involved in vasculogenesis (GO:0035441)	4	1	0.02	+	63.92	0.0155	0.383
regulation of transcription from RNA polymerase II promoter involved in determination of left/right symmetry (GO:1900094)	4	1	0.02	+	63.92	0.0155	0.383
serine phosphorylation of STAT protein (GO:0042501)	4	1	0.02	+	63.92	0.0155	0.382
embryonic genitalia morphogenesis (GO:0030538)	4	1	0.02	+	63.92	0.0155	0.381
positive regulation of circadian sleep/wake cycle, wakefulness (GO:0010841)	4	1	0.02	+	63.92	0.0155	0.381
trunk segmentation (GO:0035290)	4	1	0.02	+	63.92	0.0155	0.38
sympathetic neuron projection guidance (GO:0097491)	4	1	0.02	+	63.92	0.0155	0.38
sympathetic neuron projection extension (GO:0097490)	4	1	0.02	+	63.92	0.0155	0.379
spinal cord motor neuron migration (GO:0097476)	4	1	0.02	+	63.92	0.0155	0.378
synaptic vesicle targeting (GO:0016080)	4	1	0.02	+	63.92	0.0155	0.378
hypoxia-inducible factor-1alpha signaling pathway (GO:0097411)	4	1	0.02	+	63.92	0.0155	0.377
negative regulation of transcription from RNA polymerase II promoter in response to hypoxia (GO:0061428)	4	1	0.02	+	63.92	0.0155	0.377
neuroligin clustering involved in postsynaptic membrane assembly (GO:0097118)	4	1	0.02	+	63.92	0.0155	0.376
gephyrin clustering involved in postsynaptic density assembly (GO:0097116)	4	1	0.02	+	63.92	0.0155	0.375
epithelial cell differentiation involved in mammary gland alveolus development (GO:0061030)	4	1	0.02	+	63.92	0.0155	0.375
protein localization to basolateral plasma membrane (GO:1903361)	4	1	0.02	+	63.92	0.0155	0.374
hypothalamic tangential migration using cell-axon interactions (GO:0021856)	4	1	0.02	+	63.92	0.0155	0.374
tricuspid valve formation (GO:0003195)	4	1	0.02	+	63.92	0.0155	0.373
gonadotrophin-releasing hormone neuronal migration to the hypothalamus (GO:0021828)	4	1	0.02	+	63.92	0.0155	0.373
terminal button organization (GO:0072553)	4	1	0.02	+	63.92	0.0155	0.372
sympathetic ganglion development (GO:0061549)	9	2	0.04	+	56.82	0.000598	0.0375
synaptic vesicle clustering (GO:0097091)	9	2	0.04	+	56.82	0.000598	0.0374
cerebellar granule cell differentiation (GO:0021707)	10	2	0.04	+	51.13	0.000737	0.0446
positive regulation of proteoglycan biosynthetic process (GO:1902730)	5	1	0.02	+	51.13	0.0194	0.442
cerebellar granular layer formation (GO:0021684)	10	2	0.04	+	51.13	0.000737	0.0445
trigeminal nerve structural organization (GO:0021637)	5	1	0.02	+	51.13	0.0194	0.441
trigeminal nerve morphogenesis (GO:0021636)	5	1	0.02	+	51.13	0.0194	0.441
anterior/posterior axon guidance (GO:0033564)	5	1	0.02	+	51.13	0.0194	0.44
spinal cord oligodendrocyte cell differentiation (GO:0021529)	5	1	0.02	+	51.13	0.0194	0.439
B-1 B cell homeostasis (GO:0001922)	5	1	0.02	+	51.13	0.0194	0.439
connective tissue replacement involved in inflammatory response wound healing (GO:0002248)	5	1	0.02	+	51.13	0.0194	0.438
glutamate catabolic process (GO:0006538)	5	1	0.02	+	51.13	0.0194	0.438
positive regulation of synaptic vesicle exocytosis (GO:2000302)	5	1	0.02	+	51.13	0.0194	0.437
dipeptide import across plasma membrane (GO:0140206)	5	1	0.02	+	51.13	0.0194	0.436
oligopeptide import across plasma membrane (GO:0140205)	5	1	0.02	+	51.13	0.0194	0.436
ventricular cardiac muscle cell membrane repolarization (GO:0099625)	5	1	0.02	+	51.13	0.0194	0.435
positive regulation of gonad development (GO:1905941)	10	2	0.04	+	51.13	0.000737	0.0443
negative regulation of gonad development (GO:1905940)	5	1	0.02	+	51.13	0.0194	0.434
regulation of retinal ganglion cell axon guidance (GO:0090259)	5	1	0.02	+	51.13	0.0194	0.434
negative regulation of filopodium assembly (GO:0051490)	5	1	0.02	+	51.13	0.0194	0.433
retrograde trans-synaptic signaling by trans-synaptic protein complex (GO:0098942)	5	1	0.02	+	51.13	0.0194	0.433
negative regulation of protein kinase C signaling (GO:0090038)	5	1	0.02	+	51.13	0.0194	0.432
ISG15-protein conjugation (GO:0032020)	5	1	0.02	+	51.13	0.0194	0.431
malate-aspartate shuttle (GO:0043490)	5	1	0.02	+	51.13	0.0194	0.431
learned vocalization behavior or vocal learning (GO:0098598)	10	2	0.04	+	51.13	0.000737	0.0441
dipeptide transport (GO:0042938)	5	1	0.02	+	51.13	0.0194	0.43
gamma-aminobutyric acid metabolic process (GO:0009448)	5	1	0.02	+	51.13	0.0194	0.43
positive regulation of glucagon secretion (GO:0070094)	5	1	0.02	+	51.13	0.0194	0.429
dipeptide transmembrane transport (GO:0035442)	5	1	0.02	+	51.13	0.0194	0.428
trigeminal ganglion development (GO:0061551)	5	1	0.02	+	51.13	0.0194	0.428
negative regulation of dendrite extension (GO:1903860)	5	1	0.02	+	51.13	0.0194	0.427
AMPA glutamate receptor clustering (GO:0097113)	5	1	0.02	+	51.13	0.0194	0.427
gamma-aminobutyric acid receptor clustering (GO:0097112)	5	1	0.02	+	51.13	0.0194	0.426
presynaptic membrane assembly (GO:0097105)	10	2	0.04	+	51.13	0.000737	0.044
negative regulation of oxidative stress-induced neuron intrinsic apoptotic signaling pathway (GO:1903377)	5	1	0.02	+	51.13	0.0194	0.425
hypothalamus gonadotrophin-releasing hormone neuron development (GO:0021888)	5	1	0.02	+	51.13	0.0194	0.425
hypothalamus gonadotrophin-releasing hormone neuron differentiation (GO:0021886)	5	1	0.02	+	51.13	0.0194	0.424
mitral valve formation (GO:0003192)	5	1	0.02	+	51.13	0.0194	0.424
cerebellar granular layer development (GO:0021681)	16	3	0.06	+	47.94	3.77e-05	0.00412
telencephalon regionalization (GO:0021978)	16	3	0.06	+	47.94	3.77e-05	0.00409
neuron cell-cell adhesion (GO:0007158)	11	2	0.04	+	46.49	0.00089	0.0513
regulation of male gonad development (GO:2000018)	11	2	0.04	+	46.49	0.00089	0.0511
insulin metabolic process (GO:1901142)	11	2	0.04	+	46.49	0.00089	0.0509
postsynaptic membrane assembly (GO:0097104)	11	2	0.04	+	46.49	0.00089	0.0507
presynaptic membrane organization (GO:0097090)	11	2	0.04	+	46.49	0.00089	0.0506
dichotomous subdivision of an epithelial terminal unit (GO:0060600)	11	2	0.04	+	46.49	0.00089	0.0504
branchiomotor neuron axon guidance (GO:0021785)	6	1	0.02	+	42.61	0.0232	0.49
cerebellar granular layer morphogenesis (GO:0021683)	12	2	0.05	+	42.61	0.00106	0.0575
vestibulocochlear nerve morphogenesis (GO:0021648)	6	1	0.02	+	42.61	0.0232	0.489
regulation of grooming behavior (GO:2000821)	6	1	0.02	+	42.61	0.0232	0.488
lactate biosynthetic process (GO:0019249)	6	1	0.02	+	42.61	0.0232	0.488
regulation of mesenchymal stem cell differentiation (GO:2000739)	6	1	0.02	+	42.61	0.0232	0.487
regulation of smooth muscle cell chemotaxis (GO:0071671)	6	1	0.02	+	42.61	0.0232	0.486
mammary gland involution (GO:0060056)	6	1	0.02	+	42.61	0.0232	0.486
gamma-aminobutyric acid secretion (GO:0014051)	6	1	0.02	+	42.61	0.0232	0.485
dorsal root ganglion development (GO:1990791)	6	1	0.02	+	42.61	0.0232	0.484
regulation of integrin biosynthetic process (GO:0045113)	6	1	0.02	+	42.61	0.0232	0.484
cellular response to cocaine (GO:0071314)	6	1	0.02	+	42.61	0.0232	0.483
D-aspartate import across plasma membrane (GO:0070779)	6	1	0.02	+	42.61	0.0232	0.482
D-aspartate transport (GO:0070777)	6	1	0.02	+	42.61	0.0232	0.482
regulation of Cdc42 protein signal transduction (GO:0032489)	6	1	0.02	+	42.61	0.0232	0.481
elastin metabolic process (GO:0051541)	6	1	0.02	+	42.61	0.0232	0.481
oxygen homeostasis (GO:0032364)	6	1	0.02	+	42.61	0.0232	0.48
regulation of inflammatory response to wounding (GO:0106014)	6	1	0.02	+	42.61	0.0232	0.479
regulation of asymmetric cell division (GO:0009786)	6	1	0.02	+	42.61	0.0232	0.479
regulation of synaptic membrane adhesion (GO:0099179)	6	1	0.02	+	42.61	0.0232	0.478
postsynaptic specialization assembly (GO:0098698)	12	2	0.05	+	42.61	0.00106	0.0573
connective tissue replacement (GO:0097709)	6	1	0.02	+	42.61	0.0232	0.477
glutamate receptor clustering (GO:0097688)	6	1	0.02	+	42.61	0.0232	0.477
regulation of circadian sleep/wake cycle, wakefulness (GO:0010840)	6	1	0.02	+	42.61	0.0232	0.476
cranial ganglion development (GO:0061550)	6	1	0.02	+	42.61	0.0232	0.476
positive regulation of transcription from RNA polymerase II promoter in response to hypoxia (GO:0061419)	6	1	0.02	+	42.61	0.0232	0.475
noradrenergic neuron differentiation (GO:0003357)	6	1	0.02	+	42.61	0.0232	0.474
skeletal muscle satellite cell differentiation (GO:0014816)	6	1	0.02	+	42.61	0.0232	0.474
hypothalamus cell migration (GO:0021855)	6	1	0.02	+	42.61	0.0232	0.473
cerebral cortex GABAergic interneuron migration (GO:0021853)	6	1	0.02	+	42.61	0.0232	0.472
determination of left/right asymmetry in lateral mesoderm (GO:0003140)	6	1	0.02	+	42.61	0.0232	0.472
regulation of development, heterochronic (GO:0040034)	13	2	0.05	+	39.33	0.00124	0.0636
auditory behavior (GO:0031223)	13	2	0.05	+	39.33	0.00124	0.0634
adrenal gland development (GO:0030325)	26	4	0.1	+	39.33	3.84e-06	0.000658
regulation of transcription from RNA polymerase II promoter in response to hypoxia (GO:0061418)	13	2	0.05	+	39.33	0.00124	0.0632
neurotransmitter-gated ion channel clustering (GO:0072578)	13	2	0.05	+	39.33	0.00124	0.063
regulation of T cell anergy (GO:0002667)	7	1	0.03	+	36.52	0.027	0.54
forebrain dorsal/ventral pattern formation (GO:0021798)	7	1	0.03	+	36.52	0.027	0.54
axonogenesis involved in innervation (GO:0060385)	7	1	0.03	+	36.52	0.027	0.539
negative regulation of regulatory T cell differentiation (GO:0045590)	7	1	0.03	+	36.52	0.027	0.538
activation of JNKK activity (GO:0007256)	7	1	0.03	+	36.52	0.027	0.538
negative regulation of type B pancreatic cell apoptotic process (GO:2000675)	7	1	0.03	+	36.52	0.027	0.537
leukocyte chemotaxis involved in inflammatory response (GO:0002232)	7	1	0.03	+	36.52	0.027	0.536
embryonic retina morphogenesis in camera-type eye (GO:0060059)	7	1	0.03	+	36.52	0.027	0.536
lacrimal gland development (GO:0032808)	7	1	0.03	+	36.52	0.027	0.535
trans-synaptic signaling by endocannabinoid (GO:0099542)	7	1	0.03	+	36.52	0.027	0.534
trans-synaptic signaling by lipid (GO:0099541)	7	1	0.03	+	36.52	0.027	0.534
positive regulation of collateral sprouting (GO:0048672)	14	2	0.05	+	36.52	0.00143	0.0708
positive regulation of artery morphogenesis (GO:1905653)	7	1	0.03	+	36.52	0.027	0.533
neural crest cell migration involved in autonomic nervous system development (GO:1901166)	7	1	0.03	+	36.52	0.027	0.532
maintenance of DNA repeat elements (GO:0043570)	7	1	0.03	+	36.52	0.027	0.532
imitative learning (GO:0098596)	7	1	0.03	+	36.52	0.027	0.531
excitatory synapse assembly (GO:1904861)	14	2	0.05	+	36.52	0.00143	0.0706
positive regulation of core promoter binding (GO:1904798)	7	1	0.03	+	36.52	0.027	0.53
motor learning (GO:0061743)	7	1	0.03	+	36.52	0.027	0.53
kidney vasculature morphogenesis (GO:0061439)	7	1	0.03	+	36.52	0.027	0.529
renal system vasculature morphogenesis (GO:0061438)	7	1	0.03	+	36.52	0.027	0.528
angiogenesis involved in coronary vascular morphogenesis (GO:0060978)	7	1	0.03	+	36.52	0.027	0.528
embryonic heart tube left/right pattern formation (GO:0060971)	7	1	0.03	+	36.52	0.027	0.527
vocal learning (GO:0042297)	7	1	0.03	+	36.52	0.027	0.526
vascular endothelial growth factor production (GO:0010573)	7	1	0.03	+	36.52	0.027	0.526
regulation of lymphocyte anergy (GO:0002911)	7	1	0.03	+	36.52	0.027	0.525
positive regulation of autophagy of mitochondrion (GO:1903599)	7	1	0.03	+	36.52	0.027	0.524
positive regulation of cell fate commitment (GO:0010455)	7	1	0.03	+	36.52	0.027	0.524
pulmonary artery morphogenesis (GO:0061156)	7	1	0.03	+	36.52	0.027	0.523
radial glia guided migration of Purkinje cell (GO:0021942)	7	1	0.03	+	36.52	0.027	0.522
commitment of neuronal cell to specific neuron type in forebrain (GO:0021902)	7	1	0.03	+	36.52	0.027	0.522
fat pad development (GO:0060613)	7	1	0.03	+	36.52	0.027	0.521
tricuspid valve morphogenesis (GO:0003186)	7	1	0.03	+	36.52	0.027	0.521
cerebral cortex tangential migration (GO:0021800)	7	1	0.03	+	36.52	0.027	0.52
glial cell fate commitment (GO:0021781)	15	2	0.06	+	34.09	0.00164	0.0791
neuron projection arborization (GO:0140058)	15	2	0.06	+	34.09	0.00164	0.0788
response to auditory stimulus (GO:0010996)	23	3	0.09	+	33.35	0.00011	0.00965
positive regulation of fibroblast growth factor receptor signaling pathway (GO:0045743)	8	1	0.03	+	31.96	0.0308	0.575
hindgut morphogenesis (GO:0007442)	8	1	0.03	+	31.96	0.0308	0.575
substrate-dependent cell migration, cell extension (GO:0006930)	8	1	0.03	+	31.96	0.0308	0.574
positive regulation of synaptic vesicle clustering (GO:2000809)	8	1	0.03	+	31.96	0.0308	0.573
transdifferentiation (GO:0060290)	8	1	0.03	+	31.96	0.0308	0.573
detection of cell density (GO:0060245)	8	1	0.03	+	31.96	0.0308	0.572
contact inhibition (GO:0060242)	8	1	0.03	+	31.96	0.0308	0.571
negative regulation of cardiac muscle cell differentiation (GO:2000726)	8	1	0.03	+	31.96	0.0308	0.571
gas homeostasis (GO:0033483)	8	1	0.03	+	31.96	0.0308	0.57
regulation of transforming growth factor beta2 production (GO:0032909)	8	1	0.03	+	31.96	0.0308	0.569
wound healing involved in inflammatory response (GO:0002246)	8	1	0.03	+	31.96	0.0308	0.569
synapse maturation (GO:0060074)	16	2	0.06	+	31.96	0.00186	0.0881
neuron projection extension involved in neuron projection guidance (GO:1902284)	8	1	0.03	+	31.96	0.0308	0.568
netrin-activated signaling pathway (GO:0038007)	8	1	0.03	+	31.96	0.0308	0.567
regulation of gonad development (GO:1905939)	16	2	0.06	+	31.96	0.00186	0.0879
regulation of female gonad development (GO:2000194)	8	1	0.03	+	31.96	0.0308	0.567
axon extension involved in axon guidance (GO:0048846)	8	1	0.03	+	31.96	0.0308	0.566
lactate metabolic process (GO:0006089)	16	2	0.06	+	31.96	0.00186	0.0876
regulation of artery morphogenesis (GO:1905651)	8	1	0.03	+	31.96	0.0308	0.565
negative regulation of mitochondrial outer membrane permeabilization involved in apoptotic signaling pathway (GO:1901029)	8	1	0.03	+	31.96	0.0308	0.565
interneuron migration (GO:1904936)	8	1	0.03	+	31.96	0.0308	0.564
regulation of modification of postsynaptic actin cytoskeleton (GO:1905274)	8	1	0.03	+	31.96	0.0308	0.563
oligopeptide transmembrane transport (GO:0035672)	8	1	0.03	+	31.96	0.0308	0.563
hemoglobin biosynthetic process (GO:0042541)	8	1	0.03	+	31.96	0.0308	0.562
positive regulation of protein kinase C activity (GO:1900020)	8	1	0.03	+	31.96	0.0308	0.561
regulation of protein kinase C activity (GO:1900019)	8	1	0.03	+	31.96	0.0308	0.561
positive regulation of peroxisome proliferator activated receptor signaling pathway (GO:0035360)	8	1	0.03	+	31.96	0.0308	0.56
ganglion development (GO:0061548)	16	2	0.06	+	31.96	0.00186	0.0873
vasculogenesis involved in coronary vascular morphogenesis (GO:0060979)	16	2	0.06	+	31.96	0.00186	0.0871
neuroendocrine cell differentiation (GO:0061101)	8	1	0.03	+	31.96	0.0308	0.56
mechanosensory behavior (GO:0007638)	16	2	0.06	+	31.96	0.00186	0.0868
cerebral cortex GABAergic interneuron development (GO:0021894)	8	1	0.03	+	31.96	0.0308	0.559
negative regulation of dendritic spine morphogenesis (GO:0061002)	8	1	0.03	+	31.96	0.0308	0.558
atrioventricular valve formation (GO:0003190)	8	1	0.03	+	31.96	0.0308	0.558
tricuspid valve development (GO:0003175)	8	1	0.03	+	31.96	0.0308	0.557
regulation of axon extension involved in axon guidance (GO:0048841)	33	4	0.13	+	30.99	9.77e-06	0.00137
regulation of presynapse assembly (GO:1905606)	34	4	0.13	+	30.08	1.1e-05	0.00148
tangential migration from the subventricular zone to the olfactory bulb (GO:0022028)	9	1	0.04	+	28.41	0.0346	0.609
vestibulocochlear nerve development (GO:0021562)	9	1	0.04	+	28.41	0.0346	0.609
rhombomere development (GO:0021546)	9	1	0.04	+	28.41	0.0346	0.608
neural fold formation (GO:0001842)	9	1	0.04	+	28.41	0.0346	0.607
positive regulation of protein localization to synapse (GO:1902474)	9	1	0.04	+	28.41	0.0346	0.607
embryonic process involved in female pregnancy (GO:0060136)	9	1	0.04	+	28.41	0.0346	0.606
estrous cycle (GO:0044849)	9	1	0.04	+	28.41	0.0346	0.605
positive regulation of neuroblast proliferation (GO:0002052)	27	3	0.11	+	28.41	0.000176	0.0148
cellular response to follicle-stimulating hormone stimulus (GO:0071372)	9	1	0.04	+	28.41	0.0346	0.605
cardiac muscle cell membrane repolarization (GO:0099622)	9	1	0.04	+	28.41	0.0346	0.604
negative regulation of axon extension involved in axon guidance (GO:0048843)	27	3	0.11	+	28.41	0.000176	0.0147
regulation of branching morphogenesis of a nerve (GO:2000172)	9	1	0.04	+	28.41	0.0346	0.603
synaptic membrane adhesion (GO:0099560)	27	3	0.11	+	28.41	0.000176	0.0146
trans-synaptic signaling by trans-synaptic complex (GO:0099545)	9	1	0.04	+	28.41	0.0346	0.603
positive regulation of ligase activity (GO:0051351)	9	1	0.04	+	28.41	0.0346	0.602
regulation of nucleotide-binding oligomerization domain containing signaling pathway (GO:0070424)	9	1	0.04	+	28.41	0.0346	0.601
negative regulation of insulin-like growth factor receptor signaling pathway (GO:0043569)	9	1	0.04	+	28.41	0.0346	0.601
postsynapse assembly (GO:0099068)	18	2	0.07	+	28.41	0.00234	0.105
observational learning (GO:0098597)	9	1	0.04	+	28.41	0.0346	0.6
D-amino acid transport (GO:0042940)	9	1	0.04	+	28.41	0.0346	0.599
regulation of chemokine-mediated signaling pathway (GO:0070099)	9	1	0.04	+	28.41	0.0346	0.599
regulation of core promoter binding (GO:1904796)	9	1	0.04	+	28.41	0.0346	0.598
hepatocyte growth factor receptor signaling pathway (GO:0048012)	9	1	0.04	+	28.41	0.0346	0.597
negative regulation of transcription by competitive promoter binding (GO:0010944)	9	1	0.04	+	28.41	0.0346	0.597
hindgut development (GO:0061525)	9	1	0.04	+	28.41	0.0346	0.596
endothelial cell activation (GO:0042118)	9	1	0.04	+	28.41	0.0346	0.595
postsynaptic density assembly (GO:0097107)	9	1	0.04	+	28.41	0.0346	0.595
postsynaptic density organization (GO:0097106)	18	2	0.07	+	28.41	0.00234	0.105
hypothalamus cell differentiation (GO:0021979)	9	1	0.04	+	28.41	0.0346	0.594
olfactory bulb interneuron development (GO:0021891)	9	1	0.04	+	28.41	0.0346	0.593
regulation of oxidative stress-induced neuron intrinsic apoptotic signaling pathway (GO:1903376)	9	1	0.04	+	28.41	0.0346	0.593
forebrain regionalization (GO:0021871)	27	3	0.11	+	28.41	0.000176	0.0145
interneuron migration from the subpallium to the cortex (GO:0021830)	9	1	0.04	+	28.41	0.0346	0.592
negative regulation of astrocyte differentiation (GO:0048712)	19	2	0.07	+	26.91	0.0026	0.115
regulation of presynapse organization (GO:0099174)	38	4	0.15	+	26.91	1.69e-05	0.0021
retinal ganglion cell axon guidance (GO:0031290)	19	2	0.07	+	26.91	0.0026	0.115
retina vasculature development in camera-type eye (GO:0061298)	19	2	0.07	+	26.91	0.0026	0.115
cardiac right ventricle morphogenesis (GO:0003215)	19	2	0.07	+	26.91	0.0026	0.114
outflow tract septum morphogenesis (GO:0003148)	29	3	0.11	+	26.45	0.000216	0.0168
positive regulation of gluconeogenesis (GO:0045722)	20	2	0.08	+	25.57	0.00287	0.126
branching involved in salivary gland morphogenesis (GO:0060445)	20	2	0.08	+	25.57	0.00287	0.125
embryonic body morphogenesis (GO:0010172)	10	1	0.04	+	25.57	0.0384	0.645
facial nerve structural organization (GO:0021612)	10	1	0.04	+	25.57	0.0384	0.645
regulation of synaptic vesicle clustering (GO:2000807)	10	1	0.04	+	25.57	0.0384	0.644
interkinetic nuclear migration (GO:0022027)	10	1	0.04	+	25.57	0.0384	0.643
positive regulation of cysteine-type endopeptidase activity involved in apoptotic signaling pathway (GO:2001269)	10	1	0.04	+	25.57	0.0384	0.643
glandular epithelial cell development (GO:0002068)	20	2	0.08	+	25.57	0.00287	0.125
maintenance of epithelial cell apical/basal polarity (GO:0045199)	10	1	0.04	+	25.57	0.0384	0.642
positive regulation of neutrophil extravasation (GO:2000391)	10	1	0.04	+	25.57	0.0384	0.641
negative regulation of dendrite development (GO:2000171)	10	1	0.04	+	25.57	0.0384	0.641
dendrite arborization (GO:0140059)	10	1	0.04	+	25.57	0.0384	0.64
response to follicle-stimulating hormone (GO:0032354)	10	1	0.04	+	25.57	0.0384	0.639
negative regulation of collateral sprouting (GO:0048671)	10	1	0.04	+	25.57	0.0384	0.639
collateral sprouting (GO:0048668)	10	1	0.04	+	25.57	0.0384	0.638
positive regulation of synapse maturation (GO:0090129)	10	1	0.04	+	25.57	0.0384	0.637
regulation of ligase activity (GO:0051340)	10	1	0.04	+	25.57	0.0384	0.637
negative regulation of thymocyte apoptotic process (GO:0070244)	10	1	0.04	+	25.57	0.0384	0.636
postsynaptic specialization organization (GO:0099084)	20	2	0.08	+	25.57	0.00287	0.125
endothelial cell chemotaxis (GO:0035767)	10	1	0.04	+	25.57	0.0384	0.635
activation of MAPKKK activity (GO:0000185)	10	1	0.04	+	25.57	0.0384	0.635
protein localization to endosome (GO:0036010)	10	1	0.04	+	25.57	0.0384	0.634
norepinephrine biosynthetic process (GO:0042421)	10	1	0.04	+	25.57	0.0384	0.633
regulation of aerobic respiration (GO:1903715)	10	1	0.04	+	25.57	0.0384	0.633
coronary artery morphogenesis (GO:0060982)	10	1	0.04	+	25.57	0.0384	0.632
cardiac neural crest cell development involved in heart development (GO:0061308)	10	1	0.04	+	25.57	0.0384	0.631
cornea development in camera-type eye (GO:0061303)	10	1	0.04	+	25.57	0.0384	0.631
development of secondary female sexual characteristics (GO:0046543)	10	1	0.04	+	25.57	0.0384	0.63
negative regulation of cell maturation (GO:1903430)	10	1	0.04	+	25.57	0.0384	0.629
forebrain neuron fate commitment (GO:0021877)	10	1	0.04	+	25.57	0.0384	0.629
substrate-independent telencephalic tangential interneuron migration (GO:0021843)	10	1	0.04	+	25.57	0.0384	0.628
substrate-independent telencephalic tangential migration (GO:0021826)	10	1	0.04	+	25.57	0.0384	0.627
salivary gland morphogenesis (GO:0007435)	31	3	0.12	+	24.74	0.000263	0.0197
positive regulation of neuron migration (GO:2001224)	21	2	0.08	+	24.35	0.00316	0.137
anatomical structure arrangement (GO:0048532)	21	2	0.08	+	24.35	0.00316	0.136
presynapse assembly (GO:0099054)	21	2	0.08	+	24.35	0.00316	0.136
positive regulation of filopodium assembly (GO:0051491)	33	3	0.13	+	23.24	0.000315	0.0225
regulation of T cell tolerance induction (GO:0002664)	11	1	0.04	+	23.24	0.0421	0.678
trigeminal nerve development (GO:0021559)	11	1	0.04	+	23.24	0.0421	0.677
limb bud formation (GO:0060174)	11	1	0.04	+	23.24	0.0421	0.677
regulation of protein neddylation (GO:2000434)	11	1	0.04	+	23.24	0.0421	0.676
inflammatory response to wounding (GO:0090594)	11	1	0.04	+	23.24	0.0421	0.675
regulation of neutrophil extravasation (GO:2000389)	11	1	0.04	+	23.24	0.0421	0.675
T-helper 1 cell differentiation (GO:0045063)	11	1	0.04	+	23.24	0.0421	0.674
protein mono-ADP-ribosylation (GO:0140289)	11	1	0.04	+	23.24	0.0421	0.673
retrograde trans-synaptic signaling (GO:0098917)	11	1	0.04	+	23.24	0.0421	0.673
lipid digestion (GO:0044241)	11	1	0.04	+	23.24	0.0421	0.672
positive regulation of protein kinase C signaling (GO:0090037)	11	1	0.04	+	23.24	0.0421	0.671
regulation of timing of cell differentiation (GO:0048505)	11	1	0.04	+	23.24	0.0421	0.671
regulation of transcription from RNA polymerase II promoter in response to oxidative stress (GO:0043619)	11	1	0.04	+	23.24	0.0421	0.67
L-glutamate import across plasma membrane (GO:0098712)	11	1	0.04	+	23.24	0.0421	0.669
positive regulation of insulin-like growth factor receptor signaling pathway (GO:0043568)	11	1	0.04	+	23.24	0.0421	0.669
protein auto-ADP-ribosylation (GO:0070213)	11	1	0.04	+	23.24	0.0421	0.668
sequestering of actin monomers (GO:0042989)	11	1	0.04	+	23.24	0.0421	0.667
gamma-aminobutyric acid transport (GO:0015812)	11	1	0.04	+	23.24	0.0421	0.667
maintenance of apical/basal cell polarity (GO:0035090)	11	1	0.04	+	23.24	0.0421	0.666
cardiac neural crest cell differentiation involved in heart development (GO:0061307)	11	1	0.04	+	23.24	0.0421	0.665
retina vasculature morphogenesis in camera-type eye (GO:0061299)	11	1	0.04	+	23.24	0.0421	0.665
type B pancreatic cell differentiation (GO:0003309)	22	2	0.09	+	23.24	0.00346	0.146
microvillus assembly (GO:0030033)	11	1	0.04	+	23.24	0.0421	0.664
cerebral cortex GABAergic interneuron differentiation (GO:0021892)	11	1	0.04	+	23.24	0.0421	0.663
sympathetic nervous system development (GO:0048485)	23	2	0.09	+	22.23	0.00377	0.158
neural crest cell migration (GO:0001755)	58	5	0.23	+	22.04	3.72e-06	0.000651
salivary gland development (GO:0007431)	35	3	0.14	+	21.91	0.000374	0.0259
positive regulation of neural precursor cell proliferation (GO:2000179)	70	6	0.27	+	21.91	3.94e-07	0.000107
forebrain neuron development (GO:0021884)	35	3	0.14	+	21.91	0.000374	0.0258
facial nerve morphogenesis (GO:0021610)	12	1	0.05	+	21.31	0.0459	0.715
facial nerve development (GO:0021561)	12	1	0.05	+	21.31	0.0459	0.714
L-glutamate import (GO:0051938)	12	1	0.05	+	21.31	0.0459	0.714
nodal signaling pathway (GO:0038092)	12	1	0.05	+	21.31	0.0459	0.713
semaphorin-plexin signaling pathway involved in axon guidance (GO:1902287)	12	1	0.05	+	21.31	0.0459	0.712
left/right axis specification (GO:0070986)	12	1	0.05	+	21.31	0.0459	0.711
type B pancreatic cell proliferation (GO:0044342)	12	1	0.05	+	21.31	0.0459	0.711
dorsal/ventral axis specification (GO:0009950)	12	1	0.05	+	21.31	0.0459	0.71
regulation of collateral sprouting (GO:0048670)	24	2	0.09	+	21.31	0.0041	0.157
dicarboxylic acid catabolic process (GO:0043649)	12	1	0.05	+	21.31	0.0459	0.709
regulation of synaptic vesicle cycle (GO:0098693)	12	1	0.05	+	21.31	0.0459	0.709
lateral mesoderm development (GO:0048368)	12	1	0.05	+	21.31	0.0459	0.708
positive regulation of vascular endothelial growth factor receptor signaling pathway (GO:0030949)	12	1	0.05	+	21.31	0.0459	0.707
negative regulation of cardiocyte differentiation (GO:1905208)	12	1	0.05	+	21.31	0.0459	0.707
positive regulation of synaptic vesicle endocytosis (GO:1900244)	12	1	0.05	+	21.31	0.0459	0.706
positive regulation of production of miRNAs involved in gene silencing by miRNA (GO:1903800)	12	1	0.05	+	21.31	0.0459	0.705
neurotransmitter biosynthetic process (GO:0042136)	12	1	0.05	+	21.31	0.0459	0.704
endothelial tube morphogenesis (GO:0061154)	12	1	0.05	+	21.31	0.0459	0.704
negative regulation of muscle adaptation (GO:0014745)	12	1	0.05	+	21.31	0.0459	0.703
mitral valve morphogenesis (GO:0003183)	12	1	0.05	+	21.31	0.0459	0.702
morphogenesis of an endothelium (GO:0003159)	12	1	0.05	+	21.31	0.0459	0.702
columnar/cuboidal epithelial cell development (GO:0002066)	37	3	0.14	+	20.73	0.000439	0.0294
presynapse organization (GO:0099172)	25	2	0.1	+	20.45	0.00443	0.166
enteroendocrine cell differentiation (GO:0035883)	25	2	0.1	+	20.45	0.00443	0.166
semaphorin-plexin signaling pathway (GO:0071526)	38	3	0.15	+	20.18	0.000475	0.0309
positive regulation of excitatory postsynaptic potential (GO:2000463)	38	3	0.15	+	20.18	0.000475	0.0307
cranial nerve structural organization (GO:0021604)	13	1	0.05	+	19.67	0.0496	0.744
oligopeptide transport (GO:0006857)	13	1	0.05	+	19.67	0.0496	0.743
regulation of type B pancreatic cell apoptotic process (GO:2000674)	13	1	0.05	+	19.67	0.0496	0.742
commissural neuron axon guidance (GO:0071679)	13	1	0.05	+	19.67	0.0496	0.741
negative regulation of mesenchymal cell apoptotic process (GO:2001054)	13	1	0.05	+	19.67	0.0496	0.741
regulation of nuclear cell cycle DNA replication (GO:0033262)	13	1	0.05	+	19.67	0.0496	0.74
semaphorin-plexin signaling pathway involved in neuron projection guidance (GO:1902285)	13	1	0.05	+	19.67	0.0496	0.739
regulation of respiratory gaseous exchange by nervous system process (GO:0002087)	13	1	0.05	+	19.67	0.0496	0.739
development of secondary sexual characteristics (GO:0045136)	13	1	0.05	+	19.67	0.0496	0.738
regulation of AMPA receptor activity (GO:2000311)	26	2	0.1	+	19.67	0.00478	0.175
microvillus organization (GO:0032528)	13	1	0.05	+	19.67	0.0496	0.737
regulation of filopodium assembly (GO:0051489)	52	4	0.2	+	19.67	5.69e-05	0.00567
regulation of modification of postsynaptic structure (GO:0099159)	13	1	0.05	+	19.67	0.0496	0.737
regulation of glucagon secretion (GO:0070092)	13	1	0.05	+	19.67	0.0496	0.736
cellular response to forskolin (GO:1904322)	13	1	0.05	+	19.67	0.0496	0.735
response to forskolin (GO:1904321)	13	1	0.05	+	19.67	0.0496	0.735
positive regulation of protein kinase A signaling (GO:0010739)	13	1	0.05	+	19.67	0.0496	0.734
negative regulation of transcription from RNA polymerase II promoter in response to stress (GO:0097201)	13	1	0.05	+	19.67	0.0496	0.733
negative regulation of vasoconstriction (GO:0045906)	13	1	0.05	+	19.67	0.0496	0.732
pyramidal neuron development (GO:0021860)	13	1	0.05	+	19.67	0.0496	0.732
mitral valve development (GO:0003174)	13	1	0.05	+	19.67	0.0496	0.731
regulation of neuroblast proliferation (GO:1902692)	40	3	0.16	+	19.18	0.00055	0.0351
face morphogenesis (GO:0060325)	40	3	0.16	+	19.18	0.00055	0.0349
positive regulation of erythrocyte differentiation (GO:0045648)	27	2	0.11	+	18.94	0.00515	0.185
negative regulation of smooth muscle cell migration (GO:0014912)	27	2	0.11	+	18.94	0.00515	0.185
myoblast fusion (GO:0007520)	27	2	0.11	+	18.94	0.00515	0.185
cerebral cortex development (GO:0021987)	110	8	0.43	+	18.59	1.47e-08	7.24e-06
negative regulation of axonogenesis (GO:0050771)	69	5	0.27	+	18.53	8.58e-06	0.00124
regulation of neuron maturation (GO:0014041)	14	1	0.05	+	18.26	0.0533	0.776
neural crest cell development (GO:0014032)	84	6	0.33	+	18.26	1.13e-06	0.000257
positive regulation of hepatocyte proliferation (GO:2000347)	14	1	0.05	+	18.26	0.0533	0.775
regulation of NMDA receptor activity (GO:2000310)	28	2	0.11	+	18.26	0.00552	0.198
cellular response to gonadotropin stimulus (GO:0071371)	14	1	0.05	+	18.26	0.0533	0.774
erythrocyte development (GO:0048821)	42	3	0.16	+	18.26	0.000634	0.039
regulation of postsynaptic density assembly (GO:0099151)	14	1	0.05	+	18.26	0.0533	0.773
hemoglobin metabolic process (GO:0020027)	14	1	0.05	+	18.26	0.0533	0.773
interleukin-6-mediated signaling pathway (GO:0070102)	14	1	0.05	+	18.26	0.0533	0.772
proteasome assembly (GO:0043248)	14	1	0.05	+	18.26	0.0533	0.771
negative regulation of substrate adhesion-dependent cell spreading (GO:1900025)	14	1	0.05	+	18.26	0.0533	0.771
regulation of peroxisome proliferator activated receptor signaling pathway (GO:0035358)	14	1	0.05	+	18.26	0.0533	0.77
positive regulation of hormone biosynthetic process (GO:0046886)	14	1	0.05	+	18.26	0.0533	0.769
positive regulation of keratinocyte proliferation (GO:0010838)	14	1	0.05	+	18.26	0.0533	0.769
cell migration involved in heart development (GO:0060973)	14	1	0.05	+	18.26	0.0533	0.768
axonal transport of mitochondrion (GO:0019896)	14	1	0.05	+	18.26	0.0533	0.767
type B pancreatic cell development (GO:0003323)	14	1	0.05	+	18.26	0.0533	0.766
response to muscle activity (GO:0014850)	14	1	0.05	+	18.26	0.0533	0.766
rostrocaudal neural tube patterning (GO:0021903)	14	1	0.05	+	18.26	0.0533	0.765
cerebral cortex neuron differentiation (GO:0021895)	28	2	0.11	+	18.26	0.00552	0.197
heart valve formation (GO:0003188)	14	1	0.05	+	18.26	0.0533	0.764
oligodendrocyte differentiation (GO:0048709)	71	5	0.28	+	18.01	9.84e-06	0.00137
body morphogenesis (GO:0010171)	57	4	0.22	+	17.94	8.09e-05	0.00759
mesenchymal cell development (GO:0014031)	89	6	0.35	+	17.24	1.57e-06	0.000343
cranial nerve morphogenesis (GO:0021602)	30	2	0.12	+	17.04	0.00631	0.223
regulation of axon guidance (GO:1902667)	15	1	0.06	+	17.04	0.057	0.806
negative regulation of anoikis (GO:2000811)	15	1	0.06	+	17.04	0.057	0.806
cell differentiation in hindbrain (GO:0021533)	30	2	0.12	+	17.04	0.00631	0.223
Golgi localization (GO:0051645)	15	1	0.06	+	17.04	0.057	0.805
maintenance of synapse structure (GO:0099558)	15	1	0.06	+	17.04	0.057	0.804
adenine nucleotide transport (GO:0051503)	15	1	0.06	+	17.04	0.057	0.803
secretory granule localization (GO:0032252)	15	1	0.06	+	17.04	0.057	0.803
embryonic camera-type eye morphogenesis (GO:0048596)	30	2	0.12	+	17.04	0.00631	0.222
positive regulation of smooth muscle cell differentiation (GO:0051152)	15	1	0.06	+	17.04	0.057	0.802
negative regulation of microtubule polymerization (GO:0031115)	15	1	0.06	+	17.04	0.057	0.801
neuron remodeling (GO:0016322)	15	1	0.06	+	17.04	0.057	0.801
positive regulation of ruffle assembly (GO:1900029)	15	1	0.06	+	17.04	0.057	0.8
negative regulation of cell morphogenesis involved in differentiation (GO:0010771)	15	1	0.06	+	17.04	0.057	0.799
response to gonadotropin (GO:0034698)	15	1	0.06	+	17.04	0.057	0.798
GABAergic neuron differentiation (GO:0097154)	15	1	0.06	+	17.04	0.057	0.798
positive regulation of synaptic vesicle recycling (GO:1903423)	15	1	0.06	+	17.04	0.057	0.797
hindbrain radial glia guided cell migration (GO:0021932)	15	1	0.06	+	17.04	0.057	0.796
olfactory bulb interneuron differentiation (GO:0021889)	15	1	0.06	+	17.04	0.057	0.796
forebrain neuron differentiation (GO:0021879)	60	4	0.23	+	17.04	9.85e-05	0.00896
pyramidal neuron differentiation (GO:0021859)	15	1	0.06	+	17.04	0.057	0.795
intestinal epithelial cell development (GO:0060576)	15	1	0.06	+	17.04	0.057	0.794
stem cell development (GO:0048864)	90	6	0.35	+	17.04	1.67e-06	0.00036
head morphogenesis (GO:0060323)	46	3	0.18	+	16.67	0.000823	0.0482
neural crest cell differentiation (GO:0014033)	92	6	0.36	+	16.67	1.89e-06	0.000398
postsynaptic membrane organization (GO:0001941)	31	2	0.12	+	16.50	0.00672	0.234
regulation of protein localization to synapse (GO:1902473)	31	2	0.12	+	16.50	0.00672	0.233
positive regulation of smooth muscle cell migration (GO:0014911)	62	4	0.24	+	16.50	0.000112	0.00976
positive regulation of cartilage development (GO:0061036)	31	2	0.12	+	16.50	0.00672	0.233
outflow tract morphogenesis (GO:0003151)	78	5	0.31	+	16.39	1.54e-05	0.00196
pallium development (GO:0021543)	159	10	0.62	+	16.08	8.39e-10	6.01e-07
negative regulation of axon extension (GO:0030517)	48	3	0.19	+	15.98	0.00093	0.0519
exocrine system development (GO:0035272)	48	3	0.19	+	15.98	0.00093	0.0517
cerebellar cortex formation (GO:0021697)	32	2	0.13	+	15.98	0.00714	0.245
regulation of cysteine-type endopeptidase activity involved in apoptotic signaling pathway (GO:2001267)	16	1	0.06	+	15.98	0.0607	0.836
epithelial cell fate commitment (GO:0072148)	16	1	0.06	+	15.98	0.0607	0.835
ectodermal placode development (GO:0071696)	16	1	0.06	+	15.98	0.0607	0.834
regulation of mesenchymal cell apoptotic process (GO:2001053)	16	1	0.06	+	15.98	0.0607	0.834
epithelial cell maturation (GO:0002070)	16	1	0.06	+	15.98	0.0607	0.833
regulation of fibroblast growth factor receptor signaling pathway (GO:0040036)	32	2	0.13	+	15.98	0.00714	0.244
negative regulation of oligodendrocyte differentiation (GO:0048715)	16	1	0.06	+	15.98	0.0607	0.832
dendrite self-avoidance (GO:0070593)	16	1	0.06	+	15.98	0.0607	0.832
regulation of synapse maturation (GO:0090128)	16	1	0.06	+	15.98	0.0607	0.831
regulation of skeletal muscle tissue development (GO:0048641)	32	2	0.13	+	15.98	0.00714	0.244
positive regulation of vascular endothelial cell proliferation (GO:1905564)	16	1	0.06	+	15.98	0.0607	0.83
regulation of respiratory system process (GO:0044065)	16	1	0.06	+	15.98	0.0607	0.829
regulation of neurotransmitter receptor localization to postsynaptic specialization membrane (GO:0098696)	16	1	0.06	+	15.98	0.0607	0.829
renal absorption (GO:0070293)	16	1	0.06	+	15.98	0.0607	0.828
cellular response to hepatocyte growth factor stimulus (GO:0035729)	16	1	0.06	+	15.98	0.0607	0.827
erythrocyte maturation (GO:0043249)	16	1	0.06	+	15.98	0.0607	0.827
ephrin receptor signaling pathway (GO:0048013)	32	2	0.13	+	15.98	0.00714	0.243
potassium ion export across plasma membrane (GO:0097623)	16	1	0.06	+	15.98	0.0607	0.826
ionotropic glutamate receptor signaling pathway (GO:0035235)	16	1	0.06	+	15.98	0.0607	0.825
fibroblast migration (GO:0010761)	16	1	0.06	+	15.98	0.0607	0.824
genitalia morphogenesis (GO:0035112)	16	1	0.06	+	15.98	0.0607	0.824
coronary vasculature morphogenesis (GO:0060977)	32	2	0.13	+	15.98	0.00714	0.243
mammary gland epithelial cell differentiation (GO:0060644)	16	1	0.06	+	15.98	0.0607	0.823
regulation of skeletal muscle adaptation (GO:0014733)	16	1	0.06	+	15.98	0.0607	0.822
negative regulation of dendritic spine development (GO:0061000)	16	1	0.06	+	15.98	0.0607	0.822
heterophilic cell-cell adhesion via plasma membrane cell adhesion molecules (GO:0007157)	49	3	0.19	+	15.65	0.000986	0.0547
activation of MAPKK activity (GO:0000186)	33	2	0.13	+	15.50	0.00757	0.254
cranial nerve development (GO:0021545)	51	3	0.2	+	15.04	0.00111	0.0594
suckling behavior (GO:0001967)	17	1	0.07	+	15.04	0.0644	0.862
prepulse inhibition (GO:0060134)	17	1	0.07	+	15.04	0.0644	0.862
regulation of transcription by RNA polymerase III (GO:0006359)	17	1	0.07	+	15.04	0.0644	0.861
regulation of oligodendrocyte differentiation (GO:0048713)	51	3	0.2	+	15.04	0.00111	0.0592
regulation of astrocyte differentiation (GO:0048710)	34	2	0.13	+	15.04	0.00802	0.255
post-embryonic animal morphogenesis (GO:0009886)	17	1	0.07	+	15.04	0.0644	0.86
regulation of thymocyte apoptotic process (GO:0070243)	17	1	0.07	+	15.04	0.0644	0.859
regulation of excitatory synapse assembly (GO:1904889)	17	1	0.07	+	15.04	0.0644	0.859
calcium-dependent cell-cell adhesion via plasma membrane cell adhesion molecules (GO:0016339)	34	2	0.13	+	15.04	0.00802	0.255
purine nucleotide transport (GO:0015865)	17	1	0.07	+	15.04	0.0644	0.858
positive regulation of protein export from nucleus (GO:0046827)	17	1	0.07	+	15.04	0.0644	0.857
norepinephrine metabolic process (GO:0042415)	17	1	0.07	+	15.04	0.0644	0.856
synaptic vesicle localization (GO:0097479)	51	3	0.2	+	15.04	0.00111	0.059
response to antibiotic (GO:0046677)	34	2	0.13	+	15.04	0.00802	0.254
short-term memory (GO:0007614)	17	1	0.07	+	15.04	0.0644	0.856
negative regulation of glial cell differentiation (GO:0045686)	35	2	0.14	+	14.61	0.00847	0.267
diencephalon development (GO:0021536)	70	4	0.27	+	14.61	0.000177	0.0146
negative regulation of microtubule depolymerization (GO:0007026)	35	2	0.14	+	14.61	0.00847	0.266
dopaminergic neuron differentiation (GO:0071542)	35	2	0.14	+	14.61	0.00847	0.266
cell-cell fusion (GO:0140253)	35	2	0.14	+	14.61	0.00847	0.265
syncytium formation by plasma membrane fusion (GO:0000768)	35	2	0.14	+	14.61	0.00847	0.265
cell proliferation in forebrain (GO:0021846)	35	2	0.14	+	14.61	0.00847	0.264
autonomic nervous system development (GO:0048483)	53	3	0.21	+	14.47	0.00123	0.0637
preganglionic parasympathetic fiber development (GO:0021783)	18	1	0.07	+	14.20	0.068	0.896
dentate gyrus development (GO:0021542)	18	1	0.07	+	14.20	0.068	0.895
negative regulation of glycoprotein metabolic process (GO:1903019)	18	1	0.07	+	14.20	0.068	0.895
membrane assembly (GO:0071709)	36	2	0.14	+	14.20	0.00894	0.278
microtubule depolymerization (GO:0007019)	18	1	0.07	+	14.20	0.068	0.894
negative regulation of cardiac muscle cell proliferation (GO:0060044)	18	1	0.07	+	14.20	0.068	0.893
positive regulation of protein depolymerization (GO:1901881)	18	1	0.07	+	14.20	0.068	0.892
negative regulation of oxidative stress-induced intrinsic apoptotic signaling pathway (GO:1902176)	18	1	0.07	+	14.20	0.068	0.892
positive regulation of synaptic transmission, GABAergic (GO:0032230)	18	1	0.07	+	14.20	0.068	0.891
interleukin-1-mediated signaling pathway (GO:0070498)	18	1	0.07	+	14.20	0.068	0.89
regulation of postsynaptic specialization assembly (GO:0099150)	18	1	0.07	+	14.20	0.068	0.889
regulation of modification of synaptic structure (GO:1905244)	18	1	0.07	+	14.20	0.068	0.889
response to hepatocyte growth factor (GO:0035728)	18	1	0.07	+	14.20	0.068	0.888
embryonic eye morphogenesis (GO:0048048)	36	2	0.14	+	14.20	0.00894	0.278
regulation of cell fate specification (GO:0042659)	18	1	0.07	+	14.20	0.068	0.887
membrane repolarization (GO:0086009)	18	1	0.07	+	14.20	0.068	0.886
positive regulation of triglyceride biosynthetic process (GO:0010867)	18	1	0.07	+	14.20	0.068	0.886
kidney vasculature development (GO:0061440)	18	1	0.07	+	14.20	0.068	0.885
renal system vasculature development (GO:0061437)	18	1	0.07	+	14.20	0.068	0.884
venous blood vessel development (GO:0060841)	18	1	0.07	+	14.20	0.068	0.883
maintenance of cell polarity (GO:0030011)	18	1	0.07	+	14.20	0.068	0.883
motor neuron axon guidance (GO:0008045)	36	2	0.14	+	14.20	0.00894	0.277
forebrain generation of neurons (GO:0021872)	72	4	0.28	+	14.20	0.000197	0.0158
hypothalamus development (GO:0021854)	18	1	0.07	+	14.20	0.068	0.882
cerebellum morphogenesis (GO:0021587)	55	3	0.22	+	13.95	0.00137	0.0686
regulation of muscle tissue development (GO:1901861)	55	3	0.22	+	13.95	0.00137	0.0683
hippocampus development (GO:0021766)	74	4	0.29	+	13.82	0.000219	0.0169
syncytium formation (GO:0006949)	37	2	0.14	+	13.82	0.00942	0.289
negative regulation of chemotaxis (GO:0050922)	56	3	0.22	+	13.70	0.00144	0.071
modulation of excitatory postsynaptic potential (GO:0098815)	56	3	0.22	+	13.70	0.00144	0.0708
regulation of tolerance induction (GO:0002643)	19	1	0.07	+	13.46	0.0716	0.915
olfactory bulb development (GO:0021772)	38	2	0.15	+	13.46	0.00991	0.303
blastoderm segmentation (GO:0007350)	19	1	0.07	+	13.46	0.0716	0.914
manganese ion transport (GO:0006828)	19	1	0.07	+	13.46	0.0716	0.913
regulation of cardiac muscle cell differentiation (GO:2000725)	19	1	0.07	+	13.46	0.0716	0.913
ureter development (GO:0072189)	19	1	0.07	+	13.46	0.0716	0.912
positive regulation of synaptic transmission, glutamatergic (GO:0051968)	38	2	0.15	+	13.46	0.00991	0.302
positive regulation of actin cytoskeleton reorganization (GO:2000251)	19	1	0.07	+	13.46	0.0716	0.911
regulation of actin cytoskeleton reorganization (GO:2000249)	38	2	0.15	+	13.46	0.00991	0.301
negative regulation of fibroblast growth factor receptor signaling pathway (GO:0040037)	19	1	0.07	+	13.46	0.0716	0.911
regulation of postsynaptic density organization (GO:1905874)	19	1	0.07	+	13.46	0.0716	0.91
positive regulation of hormone metabolic process (GO:0032352)	19	1	0.07	+	13.46	0.0716	0.909
enteric nervous system development (GO:0048484)	19	1	0.07	+	13.46	0.0716	0.908
positive regulation of vascular associated smooth muscle cell migration (GO:1904754)	19	1	0.07	+	13.46	0.0716	0.908
regulation of microtubule depolymerization (GO:0031114)	38	2	0.15	+	13.46	0.00991	0.301
negative regulation of bone mineralization (GO:0030502)	19	1	0.07	+	13.46	0.0716	0.907
negative regulation of fat cell differentiation (GO:0045599)	57	3	0.22	+	13.46	0.00152	0.0742
astrocyte differentiation (GO:0048708)	58	3	0.23	+	13.22	0.0016	0.0778
regulation of substrate adhesion-dependent cell spreading (GO:1900024)	58	3	0.23	+	13.22	0.0016	0.0775
pituitary gland development (GO:0021983)	39	2	0.15	+	13.11	0.0104	0.313
regulation of neural precursor cell proliferation (GO:2000177)	117	6	0.46	+	13.11	7.41e-06	0.0011
hindbrain morphogenesis (GO:0021575)	59	3	0.23	+	13.00	0.00167	0.0804
cardiac septum morphogenesis (GO:0060411)	79	4	0.31	+	12.95	0.00028	0.0203
face development (GO:0060324)	60	3	0.23	+	12.78	0.00176	0.0838
positive regulation of neurotransmitter secretion (GO:0001956)	20	1	0.08	+	12.78	0.0753	0.946
positive regulation of stem cell differentiation (GO:2000738)	20	1	0.08	+	12.78	0.0753	0.945
vocalization behavior (GO:0071625)	20	1	0.08	+	12.78	0.0753	0.944
positive regulation of synapse assembly (GO:0051965)	80	4	0.31	+	12.78	0.000293	0.0212
negative regulation of muscle tissue development (GO:1901862)	20	1	0.08	+	12.78	0.0753	0.944
interferon-gamma production (GO:0032609)	20	1	0.08	+	12.78	0.0753	0.943
embryonic digestive tract morphogenesis (GO:0048557)	20	1	0.08	+	12.78	0.0753	0.942
skeletal muscle cell differentiation (GO:0035914)	60	3	0.23	+	12.78	0.00176	0.0835
regulation of mitochondrial outer membrane permeabilization involved in apoptotic signaling pathway (GO:1901028)	20	1	0.08	+	12.78	0.0753	0.941
L-glutamate transmembrane transport (GO:0015813)	20	1	0.08	+	12.78	0.0753	0.941
NAD metabolic process (GO:0019674)	20	1	0.08	+	12.78	0.0753	0.94
limbic system development (GO:0021761)	100	5	0.39	+	12.78	4.99e-05	0.00504
regulation of synapse assembly (GO:0051963)	121	6	0.47	+	12.68	8.96e-06	0.00128
regulation of insulin secretion involved in cellular response to glucose stimulus (GO:0061178)	81	4	0.32	+	12.63	0.000307	0.022
negative regulation of neuron projection development (GO:0010977)	163	8	0.64	+	12.55	2.89e-07	8.29e-05
regulation of p38MAPK cascade (GO:1900744)	41	2	0.16	+	12.47	0.0115	0.335
platelet-derived growth factor receptor signaling pathway (GO:0048008)	41	2	0.16	+	12.47	0.0115	0.335
olfactory lobe development (GO:0021988)	41	2	0.16	+	12.47	0.0115	0.334
cell migration in hindbrain (GO:0021535)	21	1	0.08	+	12.17	0.0789	0.98
vascular endothelial growth factor signaling pathway (GO:0038084)	21	1	0.08	+	12.17	0.0789	0.979
cell migration involved in sprouting angiogenesis (GO:0002042)	21	1	0.08	+	12.17	0.0789	0.978
cartilage condensation (GO:0001502)	21	1	0.08	+	12.17	0.0789	0.977
regulation of anoikis (GO:2000209)	21	1	0.08	+	12.17	0.0789	0.977
positive regulation of transcription from RNA polymerase II promoter involved in cellular response to chemical stimulus (GO:1901522)	21	1	0.08	+	12.17	0.0789	0.976
positive regulation of chondrocyte differentiation (GO:0032332)	21	1	0.08	+	12.17	0.0789	0.975
positive chemotaxis (GO:0050918)	21	1	0.08	+	12.17	0.0789	0.974
positive regulation of cell migration involved in sprouting angiogenesis (GO:0090050)	21	1	0.08	+	12.17	0.0789	0.973
regulation of protein kinase C signaling (GO:0090036)	21	1	0.08	+	12.17	0.0789	0.973
regulation of vascular endothelial growth factor signaling pathway (GO:1900746)	21	1	0.08	+	12.17	0.0789	0.972
parasympathetic nervous system development (GO:0048486)	21	1	0.08	+	12.17	0.0789	0.971
granulocyte differentiation (GO:0030851)	21	1	0.08	+	12.17	0.0789	0.97
mitochondrion transport along microtubule (GO:0047497)	21	1	0.08	+	12.17	0.0789	0.97
embryonic camera-type eye development (GO:0031076)	42	2	0.16	+	12.17	0.012	0.329
neuron maturation (GO:0042551)	42	2	0.16	+	12.17	0.012	0.328
positive regulation of substrate adhesion-dependent cell spreading (GO:1900026)	42	2	0.16	+	12.17	0.012	0.328
filopodium assembly (GO:0046847)	21	1	0.08	+	12.17	0.0789	0.969
muscle cell cellular homeostasis (GO:0046716)	21	1	0.08	+	12.17	0.0789	0.968
decidualization (GO:0046697)	21	1	0.08	+	12.17	0.0789	0.967
establishment of mitochondrion localization, microtubule-mediated (GO:0034643)	21	1	0.08	+	12.17	0.0789	0.967
negative regulation of ossification (GO:0030279)	42	2	0.16	+	12.17	0.012	0.327
neuron migration (GO:0001764)	147	7	0.57	+	12.17	2.02e-06	0.000413
negative regulation of developmental growth (GO:0048640)	127	6	0.5	+	12.08	1.18e-05	0.00154
regulation of extent of cell growth (GO:0061387)	129	6	0.5	+	11.89	1.28e-05	0.00166
cell fate specification (GO:0001708)	86	4	0.34	+	11.89	0.000385	0.0263
oligodendrocyte development (GO:0014003)	43	2	0.17	+	11.89	0.0125	0.34
negative chemotaxis (GO:0050919)	43	2	0.17	+	11.89	0.0125	0.34
membrane biogenesis (GO:0044091)	43	2	0.17	+	11.89	0.0125	0.339
negative regulation of organ growth (GO:0046621)	43	2	0.17	+	11.89	0.0125	0.339
cerebellar cortex development (GO:0021695)	66	3	0.26	+	11.62	0.0023	0.104
ventricular septum morphogenesis (GO:0060412)	44	2	0.17	+	11.62	0.0131	0.352
cerebellar cortex morphogenesis (GO:0021696)	44	2	0.17	+	11.62	0.0131	0.351
regulation of autophagy of mitochondrion (GO:1903146)	22	1	0.09	+	11.62	0.0825	1
neural nucleus development (GO:0048857)	22	1	0.09	+	11.62	0.0825	1
cell aggregation (GO:0098743)	22	1	0.09	+	11.62	0.0825	1
postsynaptic modulation of chemical synaptic transmission (GO:0099170)	22	1	0.09	+	11.62	0.0825	1
regulation of synaptic vesicle endocytosis (GO:1900242)	22	1	0.09	+	11.62	0.0825	1
glutamine family amino acid catabolic process (GO:0009065)	22	1	0.09	+	11.62	0.0825	1
mammary gland lobule development (GO:0061377)	22	1	0.09	+	11.62	0.0825	0.999
mammary gland alveolus development (GO:0060749)	22	1	0.09	+	11.62	0.0825	0.998
T-helper 1 type immune response (GO:0042088)	22	1	0.09	+	11.62	0.0825	0.998
intestinal epithelial cell differentiation (GO:0060575)	22	1	0.09	+	11.62	0.0825	0.997
morphogenesis of an epithelial fold (GO:0060571)	22	1	0.09	+	11.62	0.0825	0.996
neuroepithelial cell differentiation (GO:0060563)	22	1	0.09	+	11.62	0.0825	0.995
positive regulation of cellular extravasation (GO:0002693)	22	1	0.09	+	11.62	0.0825	0.994
regulation of glial cell differentiation (GO:0045685)	90	4	0.35	+	11.36	0.000456	0.0302
synaptic vesicle transport (GO:0048489)	45	2	0.18	+	11.36	0.0137	0.362
regulation of smooth muscle cell migration (GO:0014910)	90	4	0.35	+	11.36	0.000456	0.0301
positive regulation of neuron differentiation (GO:0045666)	115	5	0.45	+	11.12	9.59e-05	0.00883
nucleotide transport (GO:0006862)	23	1	0.09	+	11.12	0.0861	1
regulation of cellular response to vascular endothelial growth factor stimulus (GO:1902547)	23	1	0.09	+	11.12	0.0861	1
regulation of hepatocyte proliferation (GO:2000345)	23	1	0.09	+	11.12	0.0861	1
regulation of hormone metabolic process (GO:0032350)	46	2	0.18	+	11.12	0.0142	0.375
positive regulation of skeletal muscle tissue development (GO:0048643)	23	1	0.09	+	11.12	0.0861	1
regulation of vascular endothelial cell proliferation (GO:1905562)	23	1	0.09	+	11.12	0.0861	1
regulation of transcription from RNA polymerase II promoter in response to stress (GO:0043618)	46	2	0.18	+	11.12	0.0142	0.374
regulation of respiratory gaseous exchange (GO:0043576)	23	1	0.09	+	11.12	0.0861	1
positive regulation of leukocyte adhesion to vascular endothelial cell (GO:1904996)	23	1	0.09	+	11.12	0.0861	1
positive regulation of transcription from RNA polymerase II promoter in response to stress (GO:0036003)	23	1	0.09	+	11.12	0.0861	1
positive regulation of glucose metabolic process (GO:0010907)	46	2	0.18	+	11.12	0.0142	0.374
endocrine system development (GO:0035270)	138	6	0.54	+	11.12	1.87e-05	0.0023
signal transduction involved in regulation of gene expression (GO:0023019)	23	1	0.09	+	11.12	0.0861	1
response to fluid shear stress (GO:0034405)	23	1	0.09	+	11.12	0.0861	1
negative regulation of cell projection organization (GO:0031345)	208	9	0.81	+	11.06	1.45e-07	4.56e-05
regulation of axonogenesis (GO:0050770)	186	8	0.73	+	11.00	7.74e-07	0.00019
myeloid cell development (GO:0061515)	71	3	0.28	+	10.80	0.00282	0.124
cell-cell adhesion via plasma-membrane adhesion molecules (GO:0098742)	190	8	0.74	+	10.77	9.06e-07	0.000219
negative regulation of oxidative stress-induced neuron death (GO:1903204)	24	1	0.09	+	10.65	0.0896	1
production of molecular mediator involved in inflammatory response (GO:0002532)	24	1	0.09	+	10.65	0.0896	1
leukocyte migration involved in inflammatory response (GO:0002523)	24	1	0.09	+	10.65	0.0896	1
regulation of erythrocyte differentiation (GO:0045646)	48	2	0.19	+	10.65	0.0154	0.398
regulation of receptor localization to synapse (GO:1902683)	24	1	0.09	+	10.65	0.0896	1
cellular sodium ion homeostasis (GO:0006883)	24	1	0.09	+	10.65	0.0896	1
central nervous system myelination (GO:0022010)	24	1	0.09	+	10.65	0.0896	1
spinal cord development (GO:0021510)	96	4	0.38	+	10.65	0.00058	0.0367
activin receptor signaling pathway (GO:0032924)	24	1	0.09	+	10.65	0.0896	1
glutamate metabolic process (GO:0006536)	24	1	0.09	+	10.65	0.0896	1
positive regulation of cell junction assembly (GO:1901890)	120	5	0.47	+	10.65	0.000117	0.0102
glandular epithelial cell differentiation (GO:0002067)	48	2	0.19	+	10.65	0.0154	0.398
axon ensheathment in central nervous system (GO:0032291)	24	1	0.09	+	10.65	0.0896	1
protein sumoylation (GO:0016925)	24	1	0.09	+	10.65	0.0896	1
catechol-containing compound biosynthetic process (GO:0009713)	24	1	0.09	+	10.65	0.0896	1
negative regulation of microtubule polymerization or depolymerization (GO:0031111)	48	2	0.19	+	10.65	0.0154	0.397
catecholamine biosynthetic process (GO:0042423)	24	1	0.09	+	10.65	0.0896	1
regulation of triglyceride biosynthetic process (GO:0010866)	24	1	0.09	+	10.65	0.0896	1
retina layer formation (GO:0010842)	24	1	0.09	+	10.65	0.0896	1
positive regulation of macrophage chemotaxis (GO:0010759)	24	1	0.09	+	10.65	0.0896	1
positive regulation of epithelial to mesenchymal transition (GO:0010718)	48	2	0.19	+	10.65	0.0154	0.396
left/right pattern formation (GO:0060972)	24	1	0.09	+	10.65	0.0896	1
atrioventricular valve morphogenesis (GO:0003181)	24	1	0.09	+	10.65	0.0896	1
gland morphogenesis (GO:0022612)	121	5	0.47	+	10.57	0.000121	0.0105
telencephalon development (GO:0021537)	245	10	0.96	+	10.44	4.83e-08	1.73e-05
regulation of cardiac muscle cell proliferation (GO:0060043)	49	2	0.19	+	10.44	0.016	0.383
camera-type eye morphogenesis (GO:0048593)	147	6	0.57	+	10.44	2.66e-05	0.00303
post-embryonic development (GO:0009791)	124	5	0.48	+	10.31	0.000136	0.0115
axonal fasciculation (GO:0007413)	25	1	0.1	+	10.23	0.0932	1
ventral spinal cord development (GO:0021517)	50	2	0.2	+	10.23	0.0167	0.394
trophectodermal cell differentiation (GO:0001829)	25	1	0.1	+	10.23	0.0932	1
retina morphogenesis in camera-type eye (GO:0060042)	75	3	0.29	+	10.23	0.00329	0.14
epiboly involved in wound healing (GO:0090505)	25	1	0.1	+	10.23	0.0932	1
cellular response to estradiol stimulus (GO:0071392)	25	1	0.1	+	10.23	0.0932	1
establishment of mitochondrion localization (GO:0051654)	25	1	0.1	+	10.23	0.0932	1
positive regulation of neurotransmitter transport (GO:0051590)	25	1	0.1	+	10.23	0.0932	1
wound healing, spreading of cells (GO:0044319)	25	1	0.1	+	10.23	0.0932	1
neuron projection fasciculation (GO:0106030)	25	1	0.1	+	10.23	0.0932	1
regulation of insulin-like growth factor receptor signaling pathway (GO:0043567)	25	1	0.1	+	10.23	0.0932	1
vascular endothelial growth factor receptor signaling pathway (GO:0048010)	25	1	0.1	+	10.23	0.0932	1
C4-dicarboxylate transport (GO:0015740)	25	1	0.1	+	10.23	0.0932	1
regulation of production of miRNAs involved in gene silencing by miRNA (GO:1903798)	25	1	0.1	+	10.23	0.0932	1
neurotransmitter metabolic process (GO:0042133)	25	1	0.1	+	10.23	0.0932	1
positive regulation of glycoprotein biosynthetic process (GO:0010560)	25	1	0.1	+	10.23	0.0932	1
negative regulation of receptor signaling pathway via JAK-STAT (GO:0046426)	25	1	0.1	+	10.23	0.0932	1
central nervous system neuron development (GO:0021954)	100	4	0.39	+	10.23	0.000675	0.0414
regulation of glycoprotein metabolic process (GO:1903018)	51	2	0.2	+	10.03	0.0173	0.407
negative regulation of gliogenesis (GO:0014014)	51	2	0.2	+	10.03	0.0173	0.407
regulation of DNA-templated transcription in response to stress (GO:0043620)	51	2	0.2	+	10.03	0.0173	0.406
positive regulation of axonogenesis (GO:0050772)	102	4	0.4	+	10.03	0.000726	0.0442
neuron recognition (GO:0008038)	51	2	0.2	+	10.03	0.0173	0.406
axon guidance (GO:0007411)	231	9	0.9	+	9.96	3.46e-07	9.73e-05
neuron projection guidance (GO:0097485)	232	9	0.91	+	9.92	3.59e-07	9.9e-05
cardiac ventricle morphogenesis (GO:0003208)	78	3	0.31	+	9.83	0.00367	0.154
positive regulation of fatty acid biosynthetic process (GO:0045723)	26	1	0.1	+	9.83	0.0967	1
substrate-dependent cell migration (GO:0006929)	26	1	0.1	+	9.83	0.0967	1
telencephalon glial cell migration (GO:0022030)	26	1	0.1	+	9.83	0.0967	1
positive regulation of transcription regulatory region DNA binding (GO:2000679)	26	1	0.1	+	9.83	0.0967	1
lipid import into cell (GO:0140354)	26	1	0.1	+	9.83	0.0967	1
epiboly (GO:0090504)	26	1	0.1	+	9.83	0.0967	1
regulation of production of small RNA involved in gene silencing by RNA (GO:0070920)	26	1	0.1	+	9.83	0.0967	1
cellular response to interleukin-6 (GO:0071354)	26	1	0.1	+	9.83	0.0967	1
regulation of chondrocyte differentiation (GO:0032330)	52	2	0.2	+	9.83	0.0179	0.416
negative regulation of receptor signaling pathway via STAT (GO:1904893)	26	1	0.1	+	9.83	0.0967	1
negative regulation of biomineral tissue development (GO:0070168)	26	1	0.1	+	9.83	0.0967	1
peptide catabolic process (GO:0043171)	26	1	0.1	+	9.83	0.0967	1
regulation of striated muscle tissue development (GO:0016202)	52	2	0.2	+	9.83	0.0179	0.416
positive regulation of vascular endothelial growth factor production (GO:0010575)	26	1	0.1	+	9.83	0.0967	1
receptor localization to synapse (GO:0097120)	52	2	0.2	+	9.83	0.0179	0.415
cerebral cortex radial glia guided migration (GO:0021801)	26	1	0.1	+	9.83	0.0967	1
regulation of synaptic transmission, glutamatergic (GO:0051966)	79	3	0.31	+	9.71	0.0038	0.159
mesenchymal cell differentiation (GO:0048762)	158	6	0.62	+	9.71	3.96e-05	0.00427
cerebral cortex cell migration (GO:0021795)	53	2	0.21	+	9.65	0.0186	0.429
retina development in camera-type eye (GO:0060041)	159	6	0.62	+	9.65	4.1e-05	0.00436
lens development in camera-type eye (GO:0002088)	80	3	0.31	+	9.59	0.00394	0.152
negative regulation of neurogenesis (GO:0050768)	160	6	0.63	+	9.59	4.24e-05	0.00448
central nervous system neuron differentiation (GO:0021953)	214	8	0.84	+	9.56	2.18e-06	0.000439
positive regulation of myoblast differentiation (GO:0045663)	27	1	0.11	+	9.47	0.1	1
negative regulation of biomineralization (GO:0110150)	27	1	0.11	+	9.47	0.1	1
regulation of neuron migration (GO:2001222)	54	2	0.21	+	9.47	0.0192	0.443
positive regulation of glycoprotein metabolic process (GO:1903020)	27	1	0.11	+	9.47	0.1	1
eye photoreceptor cell differentiation (GO:0001754)	54	2	0.21	+	9.47	0.0192	0.442
protein ADP-ribosylation (GO:0006471)	27	1	0.11	+	9.47	0.1	1
positive regulation of focal adhesion assembly (GO:0051894)	27	1	0.11	+	9.47	0.1	1
regulation of oxidative stress-induced intrinsic apoptotic signaling pathway (GO:1902175)	27	1	0.11	+	9.47	0.1	1
regulation of gluconeogenesis (GO:0006111)	54	2	0.21	+	9.47	0.0192	0.441
positive regulation of oligodendrocyte differentiation (GO:0048714)	27	1	0.11	+	9.47	0.1	1
positive regulation of muscle organ development (GO:0048636)	27	1	0.11	+	9.47	0.1	1
positive regulation of neutrophil chemotaxis (GO:0090023)	27	1	0.11	+	9.47	0.1	1
digestive tract morphogenesis (GO:0048546)	54	2	0.21	+	9.47	0.0192	0.441
negative regulation of T cell apoptotic process (GO:0070233)	27	1	0.11	+	9.47	0.1	1
regulation of cellular respiration (GO:0043457)	27	1	0.11	+	9.47	0.1	1
positive regulation of circadian rhythm (GO:0042753)	27	1	0.11	+	9.47	0.1	1
endocrine pancreas development (GO:0031018)	54	2	0.21	+	9.47	0.0192	0.44
negative regulation of epithelial cell apoptotic process (GO:1904036)	54	2	0.21	+	9.47	0.0192	0.44
positive regulation of striated muscle tissue development (GO:0045844)	27	1	0.11	+	9.47	0.1	1
sex determination (GO:0007530)	27	1	0.11	+	9.47	0.1	1
atrioventricular valve development (GO:0003171)	27	1	0.11	+	9.47	0.1	1
cerebellum development (GO:0021549)	109	4	0.43	+	9.38	0.000928	0.052
glial cell differentiation (GO:0010001)	191	7	0.75	+	9.37	1.1e-05	0.00147
nerve development (GO:0021675)	82	3	0.32	+	9.35	0.00421	0.161
negative regulation of nervous system development (GO:0051961)	164	6	0.64	+	9.35	4.86e-05	0.005
positive regulation of axon extension (GO:0045773)	55	2	0.22	+	9.30	0.0199	0.433
innervation (GO:0060384)	28	1	0.11	+	9.13	0.104	1
positive regulation of cardiac muscle cell proliferation (GO:0060045)	28	1	0.11	+	9.13	0.104	1
positive regulation of muscle tissue development (GO:1901863)	28	1	0.11	+	9.13	0.104	1
lens morphogenesis in camera-type eye (GO:0002089)	28	1	0.11	+	9.13	0.104	1
protein K11-linked ubiquitination (GO:0070979)	28	1	0.11	+	9.13	0.104	1
cellular response to alkaloid (GO:0071312)	28	1	0.11	+	9.13	0.104	1
response to interleukin-6 (GO:0070741)	28	1	0.11	+	9.13	0.104	1
negative regulation of neural precursor cell proliferation (GO:2000178)	28	1	0.11	+	9.13	0.104	1
regulation of muscle organ development (GO:0048634)	56	2	0.22	+	9.13	0.0206	0.446
positive regulation of p38MAPK cascade (GO:1900745)	28	1	0.11	+	9.13	0.104	1
regulation of protein kinase A signaling (GO:0010738)	28	1	0.11	+	9.13	0.104	1
embryonic hemopoiesis (GO:0035162)	28	1	0.11	+	9.13	0.104	1
substrate adhesion-dependent cell spreading (GO:0034446)	56	2	0.22	+	9.13	0.0206	0.445
regulation of cell maturation (GO:1903429)	28	1	0.11	+	9.13	0.104	1
cardiac chamber morphogenesis (GO:0003206)	141	5	0.55	+	9.07	0.000245	0.0185
neurotransmitter secretion (GO:0007269)	85	3	0.33	+	9.02	0.00466	0.173
columnar/cuboidal epithelial cell differentiation (GO:0002065)	85	3	0.33	+	9.02	0.00466	0.172
signal release from synapse (GO:0099643)	85	3	0.33	+	9.02	0.00466	0.172
stem cell differentiation (GO:0048863)	171	6	0.67	+	8.97	6.11e-05	0.00605
regulation of neuron differentiation (GO:0045664)	228	8	0.89	+	8.97	3.46e-06	0.000633
positive regulation of blood vessel endothelial cell migration (GO:0043536)	57	2	0.22	+	8.97	0.0213	0.456
receptor clustering (GO:0043113)	57	2	0.22	+	8.97	0.0213	0.456
regulation of axon extension (GO:0030516)	114	4	0.45	+	8.97	0.00109	0.0592
negative regulation of cell development (GO:0010721)	200	7	0.78	+	8.95	1.48e-05	0.00189
positive regulation of protein kinase B signaling (GO:0051897)	115	4	0.45	+	8.89	0.00113	0.0597
eye morphogenesis (GO:0048592)	173	6	0.68	+	8.87	6.51e-05	0.00637
synapse assembly (GO:0007416)	87	3	0.34	+	8.82	0.00496	0.18
regulation of receptor recycling (GO:0001919)	29	1	0.11	+	8.82	0.107	1
positive regulation of granulocyte chemotaxis (GO:0071624)	29	1	0.11	+	8.82	0.107	1
fatty acid transmembrane transport (GO:1902001)	29	1	0.11	+	8.82	0.107	1
positive regulation of triglyceride metabolic process (GO:0090208)	29	1	0.11	+	8.82	0.107	1
regulation of leukocyte adhesion to vascular endothelial cell (GO:1904994)	29	1	0.11	+	8.82	0.107	1
regulation of vascular associated smooth muscle cell migration (GO:1904752)	29	1	0.11	+	8.82	0.107	1
positive regulation of long-term synaptic potentiation (GO:1900273)	29	1	0.11	+	8.82	0.107	1
positive regulation of transforming growth factor beta receptor signaling pathway (GO:0030511)	29	1	0.11	+	8.82	0.107	1
regulation of ruffle assembly (GO:1900027)	29	1	0.11	+	8.82	0.107	1
positive regulation of cellular response to transforming growth factor beta stimulus (GO:1903846)	29	1	0.11	+	8.82	0.107	1
acid secretion (GO:0046717)	29	1	0.11	+	8.82	0.107	1
neural precursor cell proliferation (GO:0061351)	87	3	0.34	+	8.82	0.00496	0.18
prostate gland epithelium morphogenesis (GO:0060740)	29	1	0.11	+	8.82	0.107	1
response to activity (GO:0014823)	29	1	0.11	+	8.82	0.107	1
regulation of organ growth (GO:0046620)	117	4	0.46	+	8.74	0.0012	0.0625
vasculogenesis (GO:0001570)	88	3	0.34	+	8.72	0.00512	0.185
positive regulation of organ growth (GO:0046622)	59	2	0.23	+	8.67	0.0227	0.48
regulation of regulatory T cell differentiation (GO:0045589)	30	1	0.12	+	8.52	0.111	1
positive regulation of gene silencing by miRNA (GO:2000637)	30	1	0.12	+	8.52	0.111	1
nuclear migration (GO:0007097)	30	1	0.12	+	8.52	0.111	1
positive regulation of macrophage migration (GO:1905523)	30	1	0.12	+	8.52	0.111	1
negative regulation of plasma membrane bounded cell projection assembly (GO:0120033)	30	1	0.12	+	8.52	0.111	1
regulation of vascular endothelial growth factor receptor signaling pathway (GO:0030947)	30	1	0.12	+	8.52	0.111	1
xenobiotic transport (GO:0042908)	30	1	0.12	+	8.52	0.111	1
regulation of cardiocyte differentiation (GO:1905207)	30	1	0.12	+	8.52	0.111	1
regulation of hormone biosynthetic process (GO:0046885)	30	1	0.12	+	8.52	0.111	1
central nervous system projection neuron axonogenesis (GO:0021952)	30	1	0.12	+	8.52	0.111	1
regulation of synaptic vesicle recycling (GO:1903421)	30	1	0.12	+	8.52	0.111	1
excretion (GO:0007588)	30	1	0.12	+	8.52	0.111	1
prostate gland morphogenesis (GO:0060512)	30	1	0.12	+	8.52	0.111	1
metencephalon development (GO:0022037)	121	4	0.47	+	8.45	0.00136	0.0684
cardiac septum development (GO:0003279)	121	4	0.47	+	8.45	0.00136	0.0682
gliogenesis (GO:0042063)	243	8	0.95	+	8.42	5.49e-06	0.000882
positive regulation of cellular carbohydrate metabolic process (GO:0010676)	61	2	0.24	+	8.38	0.0241	0.488
regulation of cell junction assembly (GO:1901888)	216	7	0.84	+	8.29	2.41e-05	0.00279
positive regulation of protein localization to plasma membrane (GO:1903078)	62	2	0.24	+	8.25	0.0249	0.502
heart looping (GO:0001947)	62	2	0.24	+	8.25	0.0249	0.502
positive regulation of posttranscriptional gene silencing (GO:0060148)	31	1	0.12	+	8.25	0.114	1
negative regulation of stress fiber assembly (GO:0051497)	31	1	0.12	+	8.25	0.114	1
neuron fate specification (GO:0048665)	31	1	0.12	+	8.25	0.114	1
cortical cytoskeleton organization (GO:0030865)	62	2	0.24	+	8.25	0.0249	0.501
negative regulation of cardiac muscle tissue growth (GO:0055022)	31	1	0.12	+	8.25	0.114	1
negative regulation of heart growth (GO:0061117)	31	1	0.12	+	8.25	0.114	1
regulation of animal organ formation (GO:0003156)	31	1	0.12	+	8.25	0.114	1
positive regulation of nervous system development (GO:0051962)	345	11	1.35	+	8.15	1.18e-07	3.86e-05
regulation of focal adhesion assembly (GO:0051893)	63	2	0.25	+	8.12	0.0256	0.515
regulation of cell-substrate junction assembly (GO:0090109)	63	2	0.25	+	8.12	0.0256	0.514
ameboidal-type cell migration (GO:0001667)	190	6	0.74	+	8.07	0.000108	0.00959
forebrain development (GO:0030900)	383	12	1.5	+	8.01	3.61e-08	1.42e-05
postsynapse organization (GO:0099173)	96	3	0.38	+	7.99	0.0065	0.228
maternal placenta development (GO:0001893)	32	1	0.13	+	7.99	0.118	1
B cell homeostasis (GO:0001782)	32	1	0.13	+	7.99	0.118	1
blood vessel endothelial cell migration (GO:0043534)	32	1	0.13	+	7.99	0.118	1
entrainment of circadian clock (GO:0009649)	32	1	0.13	+	7.99	0.118	1
establishment of mitotic spindle orientation (GO:0000132)	32	1	0.13	+	7.99	0.118	1
regulation of circadian sleep/wake cycle (GO:0042749)	32	1	0.13	+	7.99	0.118	1
positive regulation of cell-substrate junction organization (GO:0150117)	32	1	0.13	+	7.99	0.118	1
regulation of protein export from nucleus (GO:0046825)	32	1	0.13	+	7.99	0.118	1
regulation of dendrite extension (GO:1903859)	32	1	0.13	+	7.99	0.118	1
regulation of vascular endothelial growth factor production (GO:0010574)	32	1	0.13	+	7.99	0.118	1
negative regulation of growth (GO:0045926)	262	8	1.02	+	7.81	9.44e-06	0.00134
neuroblast proliferation (GO:0007405)	33	1	0.13	+	7.75	0.121	1
myoblast differentiation (GO:0045445)	33	1	0.13	+	7.75	0.121	1
CD4-positive, alpha-beta T cell differentiation involved in immune response (GO:0002294)	33	1	0.13	+	7.75	0.121	1
positive regulation of telomerase activity (GO:0051973)	33	1	0.13	+	7.75	0.121	1
embryonic digestive tract development (GO:0048566)	33	1	0.13	+	7.75	0.121	1
regulation of smooth muscle cell differentiation (GO:0051150)	33	1	0.13	+	7.75	0.121	1
positive regulation of microtubule polymerization or depolymerization (GO:0031112)	33	1	0.13	+	7.75	0.121	1
hair follicle morphogenesis (GO:0031069)	33	1	0.13	+	7.75	0.121	1
cell communication involved in cardiac conduction (GO:0086065)	33	1	0.13	+	7.75	0.121	1
cardiac muscle cell action potential involved in contraction (GO:0086002)	33	1	0.13	+	7.75	0.121	1
negative regulation of cardiac muscle cell apoptotic process (GO:0010667)	33	1	0.13	+	7.75	0.121	1
T-helper cell differentiation (GO:0042093)	33	1	0.13	+	7.75	0.121	1
regulation of morphogenesis of a branching structure (GO:0060688)	66	2	0.26	+	7.75	0.0279	0.534
lactation (GO:0007595)	33	1	0.13	+	7.75	0.121	1
positive regulation of synaptic transmission (GO:0050806)	166	5	0.65	+	7.70	0.000514	0.033
regulation of behavior (GO:0050795)	100	3	0.39	+	7.67	0.00727	0.246
erythrocyte differentiation (GO:0030218)	100	3	0.39	+	7.67	0.00727	0.246
regulation of nervous system development (GO:0051960)	534	16	2.09	+	7.66	2.82e-10	2.77e-07
hindbrain development (GO:0030902)	167	5	0.65	+	7.65	0.000528	0.0338
vesicle targeting (GO:0006903)	34	1	0.13	+	7.52	0.125	1
telencephalon cell migration (GO:0022029)	68	2	0.27	+	7.52	0.0294	0.557
ventricular system development (GO:0021591)	34	1	0.13	+	7.52	0.125	1
camera-type eye photoreceptor cell differentiation (GO:0060219)	34	1	0.13	+	7.52	0.125	1
regulation of neurotransmitter receptor activity (GO:0099601)	68	2	0.27	+	7.52	0.0294	0.556
regulation of neutrophil chemotaxis (GO:0090022)	34	1	0.13	+	7.52	0.125	1
regulation of cell-substrate junction organization (GO:0150116)	68	2	0.27	+	7.52	0.0294	0.555
regulation of macrophage chemotaxis (GO:0010758)	34	1	0.13	+	7.52	0.125	1
amino acid import across plasma membrane (GO:0089718)	34	1	0.13	+	7.52	0.125	1
determination of heart left/right asymmetry (GO:0061371)	68	2	0.27	+	7.52	0.0294	0.555
negative regulation of muscle hypertrophy (GO:0014741)	34	1	0.13	+	7.52	0.125	1
regulation of neuron projection development (GO:0010975)	546	16	2.14	+	7.49	3.88e-10	3.39e-07
neuromuscular process controlling balance (GO:0050885)	69	2	0.27	+	7.41	0.0302	0.568
positive regulation of protein localization to cell periphery (GO:1904377)	69	2	0.27	+	7.41	0.0302	0.568
myotube differentiation (GO:0014902)	69	2	0.27	+	7.41	0.0302	0.567
embryonic heart tube morphogenesis (GO:0003143)	69	2	0.27	+	7.41	0.0302	0.566
regulation of oxidative stress-induced neuron death (GO:1903203)	35	1	0.14	+	7.30	0.128	1
neuronal action potential (GO:0019228)	35	1	0.14	+	7.30	0.128	1
alpha-beta T cell differentiation involved in immune response (GO:0002293)	35	1	0.14	+	7.30	0.128	1
cellular response to cAMP (GO:0071320)	35	1	0.14	+	7.30	0.128	1
artery morphogenesis (GO:0048844)	70	2	0.27	+	7.30	0.0311	0.56
cellular response to nerve growth factor stimulus (GO:1990090)	35	1	0.14	+	7.30	0.128	1
response to nerve growth factor (GO:1990089)	35	1	0.14	+	7.30	0.128	1
actin cytoskeleton reorganization (GO:0031532)	70	2	0.27	+	7.30	0.0311	0.559
negative regulation of fibroblast proliferation (GO:0048147)	35	1	0.14	+	7.30	0.128	1
positive regulation of protein-containing complex disassembly (GO:0043243)	35	1	0.14	+	7.30	0.128	1
regulation of cell fate commitment (GO:0010453)	35	1	0.14	+	7.30	0.128	1
cardiac ventricle development (GO:0003231)	140	4	0.55	+	7.30	0.0023	0.104
regulation of cartilage development (GO:0061035)	70	2	0.27	+	7.30	0.0311	0.559
regulation of cell size (GO:0008361)	211	6	0.83	+	7.27	0.000191	0.0153
positive regulation of neurogenesis (GO:0050769)	284	8	1.11	+	7.20	1.68e-05	0.0021
forebrain cell migration (GO:0021885)	71	2	0.28	+	7.20	0.0319	0.571
positive regulation of neutrophil migration (GO:1902624)	36	1	0.14	+	7.10	0.131	1
startle response (GO:0001964)	36	1	0.14	+	7.10	0.131	1
alpha-beta T cell activation involved in immune response (GO:0002287)	36	1	0.14	+	7.10	0.131	1
nucleus localization (GO:0051647)	36	1	0.14	+	7.10	0.131	1
establishment of mitotic spindle localization (GO:0040001)	36	1	0.14	+	7.10	0.131	1
axon extension (GO:0048675)	36	1	0.14	+	7.10	0.131	1
positive regulation of developmental growth (GO:0048639)	216	6	0.84	+	7.10	0.000216	0.0168
negative regulation of actin filament bundle assembly (GO:0032232)	36	1	0.14	+	7.10	0.131	1
positive regulation of vascular associated smooth muscle cell proliferation (GO:1904707)	36	1	0.14	+	7.10	0.131	1
regulation of heart rate by cardiac conduction (GO:0086091)	36	1	0.14	+	7.10	0.131	1
regulation of keratinocyte proliferation (GO:0010837)	36	1	0.14	+	7.10	0.131	1
viral entry into host cell (GO:0046718)	36	1	0.14	+	7.10	0.131	1
negative regulation of striated muscle cell apoptotic process (GO:0010664)	36	1	0.14	+	7.10	0.131	1
positive regulation of endothelial cell migration (GO:0010595)	108	3	0.42	+	7.10	0.00896	0.277
mesenchyme development (GO:0060485)	218	6	0.85	+	7.04	0.000227	0.0174
homophilic cell adhesion via plasma membrane adhesion molecules (GO:0007156)	109	3	0.43	+	7.04	0.00918	0.283
regulation of neurogenesis (GO:0050767)	436	12	1.71	+	7.04	1.45e-07	4.47e-05
coronary vasculature development (GO:0060976)	73	2	0.29	+	7.00	0.0335	0.595
photoreceptor cell differentiation (GO:0046530)	73	2	0.29	+	7.00	0.0335	0.594
cerebellar Purkinje cell layer development (GO:0021680)	37	1	0.14	+	6.91	0.135	1
entry into host (GO:0044409)	37	1	0.14	+	6.91	0.135	1
positive regulation of cell cycle arrest (GO:0071158)	37	1	0.14	+	6.91	0.135	1
proximal/distal pattern formation (GO:0009954)	37	1	0.14	+	6.91	0.135	1
neuron fate commitment (GO:0048663)	74	2	0.29	+	6.91	0.0344	0.607
detection of biotic stimulus (GO:0009595)	37	1	0.14	+	6.91	0.135	1
sodium ion homeostasis (GO:0055078)	37	1	0.14	+	6.91	0.135	1
regulation of synapse organization (GO:0050807)	260	7	1.02	+	6.88	7.68e-05	0.00728
erythrocyte homeostasis (GO:0034101)	112	3	0.44	+	6.85	0.00988	0.303
positive regulation of plasma membrane bounded cell projection assembly (GO:0120034)	112	3	0.44	+	6.85	0.00988	0.302
negative regulation of protein depolymerization (GO:1901880)	75	2	0.29	+	6.82	0.0352	0.6
negative regulation of protein polymerization (GO:0032272)	75	2	0.29	+	6.82	0.0352	0.599
cardiac chamber development (GO:0003205)	188	5	0.74	+	6.80	0.000896	0.0506
tissue remodeling (GO:0048771)	113	3	0.44	+	6.79	0.0101	0.305
cerebral cortex radially oriented cell migration (GO:0021799)	38	1	0.15	+	6.73	0.138	1
tumor necrosis factor-mediated signaling pathway (GO:0033209)	38	1	0.15	+	6.73	0.138	1
epidermis morphogenesis (GO:0048730)	38	1	0.15	+	6.73	0.138	1
establishment of spindle orientation (GO:0051294)	38	1	0.15	+	6.73	0.138	1
positive regulation of G1/S transition of mitotic cell cycle (GO:1900087)	38	1	0.15	+	6.73	0.138	1
cardiac muscle cell contraction (GO:0086003)	38	1	0.15	+	6.73	0.138	1
cardiac muscle cell action potential (GO:0086001)	38	1	0.15	+	6.73	0.138	1
cell junction maintenance (GO:0034331)	38	1	0.15	+	6.73	0.138	1
dendrite morphogenesis (GO:0048813)	77	2	0.3	+	6.64	0.0369	0.624
exocytic process (GO:0140029)	77	2	0.3	+	6.64	0.0369	0.623
regulation of cardiac muscle tissue growth (GO:0055021)	77	2	0.3	+	6.64	0.0369	0.622
glial cell development (GO:0021782)	116	3	0.45	+	6.61	0.0109	0.323
regulation of cell morphogenesis involved in differentiation (GO:0010769)	116	3	0.45	+	6.61	0.0109	0.322
neural tube development (GO:0021915)	194	5	0.76	+	6.59	0.00103	0.0563
regulation of synapse structure or activity (GO:0050803)	272	7	1.06	+	6.58	0.000101	0.00913
phenol-containing compound biosynthetic process (GO:0046189)	39	1	0.15	+	6.56	0.142	1
glutamate receptor signaling pathway (GO:0007215)	39	1	0.15	+	6.56	0.142	1
T cell differentiation involved in immune response (GO:0002292)	39	1	0.15	+	6.56	0.142	1
cellular response to calcium ion (GO:0071277)	78	2	0.31	+	6.56	0.0378	0.636
regulation of synaptic transmission, GABAergic (GO:0032228)	39	1	0.15	+	6.56	0.142	1
regulation of cell migration involved in sprouting angiogenesis (GO:0090049)	39	1	0.15	+	6.56	0.142	1
protein depolymerization (GO:0051261)	39	1	0.15	+	6.56	0.142	1
negative regulation of striated muscle cell differentiation (GO:0051154)	39	1	0.15	+	6.56	0.142	1
positive regulation of morphogenesis of an epithelium (GO:1905332)	39	1	0.15	+	6.56	0.142	1
amine biosynthetic process (GO:0009309)	39	1	0.15	+	6.56	0.142	1
cellular biogenic amine biosynthetic process (GO:0042401)	39	1	0.15	+	6.56	0.142	1
adipose tissue development (GO:0060612)	39	1	0.15	+	6.56	0.142	1
regulation of cellular extravasation (GO:0002691)	39	1	0.15	+	6.56	0.142	1
head development (GO:0060322)	703	18	2.75	+	6.55	2.31e-10	2.43e-07
axonogenesis (GO:0007409)	352	9	1.38	+	6.54	1.05e-05	0.00143
gland development (GO:0048732)	431	11	1.69	+	6.53	1.04e-06	0.00024
vesicle localization (GO:0051648)	157	4	0.61	+	6.51	0.00347	0.146
regulation of developmental growth (GO:0048638)	394	10	1.54	+	6.49	3.49e-06	0.000625
protein localization to synapse (GO:0035418)	79	2	0.31	+	6.47	0.0387	0.631
ventricular septum development (GO:0003281)	79	2	0.31	+	6.47	0.0387	0.63
smoothened signaling pathway (GO:0007224)	80	2	0.31	+	6.39	0.0396	0.643
regulation of transforming growth factor beta production (GO:0071634)	40	1	0.16	+	6.39	0.145	1
cellular response to transforming growth factor beta stimulus (GO:0071560)	120	3	0.47	+	6.39	0.0119	0.326
positive regulation of interleukin-12 production (GO:0032735)	40	1	0.16	+	6.39	0.145	1
positive regulation of behavior (GO:0048520)	40	1	0.16	+	6.39	0.145	1
cellular response to vascular endothelial growth factor stimulus (GO:0035924)	40	1	0.16	+	6.39	0.145	1
negative regulation of lymphocyte apoptotic process (GO:0070229)	40	1	0.16	+	6.39	0.145	1
acidic amino acid transport (GO:0015800)	40	1	0.16	+	6.39	0.145	1
eye photoreceptor cell development (GO:0042462)	40	1	0.16	+	6.39	0.145	1
regulation of gliogenesis (GO:0014013)	121	3	0.47	+	6.34	0.0121	0.331
brain development (GO:0007420)	648	16	2.53	+	6.31	4.4e-09	2.67e-06
T cell activation involved in immune response (GO:0002286)	81	2	0.32	+	6.31	0.0405	0.655
negative regulation of Wnt signaling pathway (GO:0030178)	162	4	0.63	+	6.31	0.00387	0.161
regulation of plasma membrane bounded cell projection organization (GO:0120035)	730	18	2.86	+	6.30	4.2e-10	3.48e-07
positive regulation of peptide hormone secretion (GO:0090277)	123	3	0.48	+	6.24	0.0127	0.342
transforming growth factor beta receptor signaling pathway (GO:0007179)	82	2	0.32	+	6.24	0.0414	0.669
L-alpha-amino acid transmembrane transport (GO:1902475)	41	1	0.16	+	6.24	0.148	1
cell fate determination (GO:0001709)	41	1	0.16	+	6.24	0.148	1
branching involved in blood vessel morphogenesis (GO:0001569)	41	1	0.16	+	6.24	0.148	1
metal ion export (GO:0070839)	41	1	0.16	+	6.24	0.148	1
movement in host environment (GO:0052126)	41	1	0.16	+	6.24	0.148	1
amino acid import (GO:0043090)	41	1	0.16	+	6.24	0.148	1
response to cocaine (GO:0042220)	41	1	0.16	+	6.24	0.148	1
positive regulation of carbohydrate metabolic process (GO:0045913)	82	2	0.32	+	6.24	0.0414	0.669
negative regulation of cytoskeleton organization (GO:0051494)	165	4	0.65	+	6.20	0.00413	0.158
negative regulation of supramolecular fiber organization (GO:1902904)	165	4	0.65	+	6.20	0.00413	0.158
fat cell differentiation (GO:0045444)	124	3	0.48	+	6.19	0.013	0.349
negative regulation of locomotion (GO:0040013)	331	8	1.29	+	6.18	4.93e-05	0.00504
cell projection morphogenesis (GO:0048858)	497	12	1.94	+	6.17	5.76e-07	0.000151
regulation of cell projection organization (GO:0031344)	746	18	2.92	+	6.17	5.91e-10	4.66e-07
response to transforming growth factor beta (GO:0071559)	125	3	0.49	+	6.14	0.0132	0.355
regulation of heart growth (GO:0060420)	84	2	0.33	+	6.09	0.0432	0.679
vesicle docking involved in exocytosis (GO:0006904)	42	1	0.16	+	6.09	0.152	1
negative regulation of DNA biosynthetic process (GO:2000279)	42	1	0.16	+	6.09	0.152	1
potassium ion import across plasma membrane (GO:1990573)	42	1	0.16	+	6.09	0.152	1
localization within membrane (GO:0051668)	84	2	0.33	+	6.09	0.0432	0.678
positive regulation of angiogenesis (GO:0045766)	169	4	0.66	+	6.05	0.00449	0.168
positive regulation of vasculature development (GO:1904018)	169	4	0.66	+	6.05	0.00449	0.167
negative regulation of protein-containing complex disassembly (GO:0043242)	85	2	0.33	+	6.02	0.0441	0.692
axon development (GO:0061564)	383	9	1.5	+	6.01	2.03e-05	0.00244
cellular response to leukemia inhibitory factor (GO:1990830)	128	3	0.5	+	5.99	0.0141	0.372
negative regulation of transcription by RNA polymerase II (GO:0000122)	901	21	3.52	+	5.96	3.16e-11	5.53e-08
neurotransmitter transport (GO:0006836)	129	3	0.5	+	5.95	0.0144	0.376
response to leukemia inhibitory factor (GO:1990823)	129	3	0.5	+	5.95	0.0144	0.375
negative regulation of canonical Wnt signaling pathway (GO:0090090)	129	3	0.5	+	5.95	0.0144	0.375
neural tube patterning (GO:0021532)	43	1	0.17	+	5.95	0.155	1
regulation of protein kinase B signaling (GO:0051896)	172	4	0.67	+	5.95	0.00478	0.175
cellular response to hypoxia (GO:0071456)	86	2	0.34	+	5.95	0.045	0.704
positive regulation of potassium ion transmembrane transport (GO:1901381)	43	1	0.17	+	5.95	0.155	1
positive regulation of insulin secretion involved in cellular response to glucose stimulus (GO:0035774)	43	1	0.17	+	5.95	0.155	1
positive regulation of cardiac muscle tissue growth (GO:0055023)	43	1	0.17	+	5.95	0.155	1
regulation of fatty acid biosynthetic process (GO:0042304)	43	1	0.17	+	5.95	0.155	1
embryonic heart tube development (GO:0035050)	86	2	0.34	+	5.95	0.045	0.703
central nervous system neuron axonogenesis (GO:0021955)	43	1	0.17	+	5.95	0.155	1
cell part morphogenesis (GO:0032990)	522	12	2.04	+	5.88	9.59e-07	0.000229
cell maturation (GO:0048469)	174	4	0.68	+	5.88	0.00498	0.18
pancreas development (GO:0031016)	87	2	0.34	+	5.88	0.046	0.703
synapse organization (GO:0050808)	305	7	1.19	+	5.87	0.000204	0.0162
regulation of dendrite development (GO:0050773)	131	3	0.51	+	5.86	0.015	0.388
central nervous system development (GO:0007417)	875	20	3.42	+	5.84	1.43e-10	1.87e-07
cell fate commitment (GO:0045165)	263	6	1.03	+	5.83	0.000608	0.0379
blood vessel remodeling (GO:0001974)	44	1	0.17	+	5.81	0.158	1
catecholamine metabolic process (GO:0006584)	44	1	0.17	+	5.81	0.158	1
behavioral fear response (GO:0001662)	44	1	0.17	+	5.81	0.158	1
establishment or maintenance of epithelial cell apical/basal polarity (GO:0045197)	44	1	0.17	+	5.81	0.158	1
cellular response to retinoic acid (GO:0071300)	44	1	0.17	+	5.81	0.158	1
positive regulation of signaling receptor activity (GO:2000273)	44	1	0.17	+	5.81	0.158	1
protein K63-linked ubiquitination (GO:0070534)	44	1	0.17	+	5.81	0.158	1
catechol-containing compound metabolic process (GO:0009712)	44	1	0.17	+	5.81	0.158	1
negative regulation of TOR signaling (GO:0032007)	44	1	0.17	+	5.81	0.158	1
regulation of T cell apoptotic process (GO:0070232)	44	1	0.17	+	5.81	0.158	1
glial cell migration (GO:0008347)	44	1	0.17	+	5.81	0.158	1
respiratory gaseous exchange by respiratory system (GO:0007585)	44	1	0.17	+	5.81	0.158	1
positive regulation of pri-miRNA transcription by RNA polymerase II (GO:1902895)	44	1	0.17	+	5.81	0.158	1
neuron projection morphogenesis (GO:0048812)	486	11	1.9	+	5.79	3.27e-06	0.000606
positive regulation of cell-substrate adhesion (GO:0010811)	133	3	0.52	+	5.77	0.0156	0.373
regionalization (GO:0003002)	355	8	1.39	+	5.76	8e-05	0.00754
muscle organ morphogenesis (GO:0048644)	89	2	0.35	+	5.75	0.0479	0.726
plasma membrane bounded cell projection morphogenesis (GO:0120039)	491	11	1.92	+	5.73	3.6e-06	0.000637
cell morphogenesis involved in neuron differentiation (GO:0048667)	448	10	1.75	+	5.71	1.06e-05	0.00144
regulation of chemotaxis (GO:0050920)	224	5	0.88	+	5.71	0.00193	0.0896
negative regulation of neuron differentiation (GO:0045665)	90	2	0.35	+	5.68	0.0488	0.736
negative regulation of protein kinase B signaling (GO:0051898)	45	1	0.18	+	5.68	0.162	1
spleen development (GO:0048536)	45	1	0.18	+	5.68	0.162	1
regulation of macrophage migration (GO:1905521)	45	1	0.18	+	5.68	0.162	1
positive regulation of insulin secretion (GO:0032024)	90	2	0.35	+	5.68	0.0488	0.735
cellular response to virus (GO:0098586)	45	1	0.18	+	5.68	0.162	1
CD4-positive, alpha-beta T cell differentiation (GO:0043367)	45	1	0.18	+	5.68	0.162	1
prostate gland development (GO:0030850)	45	1	0.18	+	5.68	0.162	1
regulation of microtubule polymerization or depolymerization (GO:0031110)	90	2	0.35	+	5.68	0.0488	0.734
positive regulation of cell development (GO:0010720)	361	8	1.41	+	5.67	8.98e-05	0.00831
neuron differentiation (GO:0030182)	1083	24	4.24	+	5.67	2.58e-12	1.02e-08
import across plasma membrane (GO:0098739)	136	3	0.53	+	5.64	0.0165	0.392
cell-cell adhesion (GO:0098609)	409	9	1.6	+	5.63	3.37e-05	0.00374
cell cycle arrest (GO:0007050)	91	2	0.36	+	5.62	0.0498	0.734
regulation of dendrite morphogenesis (GO:0048814)	91	2	0.36	+	5.62	0.0498	0.733
cellular response to decreased oxygen levels (GO:0036294)	91	2	0.36	+	5.62	0.0498	0.732
regulation of receptor signaling pathway via JAK-STAT (GO:0046425)	91	2	0.36	+	5.62	0.0498	0.732
pattern specification process (GO:0007389)	456	10	1.78	+	5.61	1.24e-05	0.00161
positive regulation of DNA replication (GO:0045740)	46	1	0.18	+	5.56	0.165	1
positive regulation of heart growth (GO:0060421)	46	1	0.18	+	5.56	0.165	1
toxin transport (GO:1901998)	46	1	0.18	+	5.56	0.165	1
behavioral defense response (GO:0002209)	46	1	0.18	+	5.56	0.165	1
action potential (GO:0001508)	92	2	0.36	+	5.56	0.0508	0.744
negative regulation of I-kappaB kinase/NF-kappaB signaling (GO:0043124)	46	1	0.18	+	5.56	0.165	1
ATP-dependent chromatin remodeling (GO:0043044)	46	1	0.18	+	5.56	0.165	1
regulation of glycoprotein biosynthetic process (GO:0010559)	46	1	0.18	+	5.56	0.165	1
positive regulation of fatty acid metabolic process (GO:0045923)	46	1	0.18	+	5.56	0.165	1
adult walking behavior (GO:0007628)	46	1	0.18	+	5.56	0.165	1
positive regulation of cell growth (GO:0030307)	185	4	0.72	+	5.53	0.00616	0.218
dendrite development (GO:0016358)	139	3	0.54	+	5.52	0.0175	0.41
regulation of protein localization to cell periphery (GO:1904375)	139	3	0.54	+	5.52	0.0175	0.41
regulation of peptide hormone secretion (GO:0090276)	232	5	0.91	+	5.51	0.00224	0.102
neuron development (GO:0048666)	882	19	3.45	+	5.51	1.18e-09	8.1e-07
dorsal/ventral pattern formation (GO:0009953)	93	2	0.36	+	5.50	0.0518	0.757
axis specification (GO:0009798)	93	2	0.36	+	5.50	0.0518	0.757
myeloid cell homeostasis (GO:0002262)	140	3	0.55	+	5.48	0.0179	0.416
skeletal muscle tissue development (GO:0007519)	140	3	0.55	+	5.48	0.0179	0.415
maternal process involved in female pregnancy (GO:0060135)	47	1	0.18	+	5.44	0.168	1
mRNA export from nucleus (GO:0006406)	47	1	0.18	+	5.44	0.168	1
mRNA-containing ribonucleoprotein complex export from nucleus (GO:0071427)	47	1	0.18	+	5.44	0.168	1
regulation of DNA-dependent DNA replication (GO:0090329)	47	1	0.18	+	5.44	0.168	1
regulation of insulin secretion (GO:0050796)	188	4	0.74	+	5.44	0.00651	0.228
regulation of blood vessel endothelial cell migration (GO:0043535)	94	2	0.37	+	5.44	0.0527	0.769
response to hydrogen peroxide (GO:0042542)	94	2	0.37	+	5.44	0.0527	0.768
bone mineralization (GO:0030282)	47	1	0.18	+	5.44	0.168	1
endocardial cushion development (GO:0003197)	47	1	0.18	+	5.44	0.168	1
negative regulation of cell migration (GO:0030336)	283	6	1.11	+	5.42	0.000888	0.0514
regulation of signaling receptor activity (GO:0010469)	142	3	0.56	+	5.40	0.0185	0.428
regulation of protein depolymerization (GO:1901879)	95	2	0.37	+	5.38	0.0537	0.77
regulation of stress fiber assembly (GO:0051492)	95	2	0.37	+	5.38	0.0537	0.769
regulation of neutrophil migration (GO:1902622)	48	1	0.19	+	5.33	0.171	1
negative regulation of T cell differentiation (GO:0045581)	48	1	0.19	+	5.33	0.171	1
positive regulation of cytokine-mediated signaling pathway (GO:0001961)	48	1	0.19	+	5.33	0.171	1
regulation of cell development (GO:0060284)	576	12	2.25	+	5.33	2.64e-06	0.000506
regulation of telomerase activity (GO:0051972)	48	1	0.19	+	5.33	0.171	1
walking behavior (GO:0090659)	48	1	0.19	+	5.33	0.171	1
calcium ion import (GO:0070509)	48	1	0.19	+	5.33	0.171	1
regulation of epithelial to mesenchymal transition (GO:0010717)	96	2	0.38	+	5.33	0.0547	0.782
regulation of gene silencing by miRNA (GO:0060964)	48	1	0.19	+	5.33	0.171	1
somatic stem cell population maintenance (GO:0035019)	48	1	0.19	+	5.33	0.171	1
regulation of epithelial cell apoptotic process (GO:1904035)	96	2	0.38	+	5.33	0.0547	0.781
heart valve morphogenesis (GO:0003179)	48	1	0.19	+	5.33	0.171	1
positive regulation of cell cycle G1/S phase transition (GO:1902808)	48	1	0.19	+	5.33	0.171	1
positive regulation of cell projection organization (GO:0031346)	433	9	1.69	+	5.31	5.22e-05	0.00524
neurogenesis (GO:0022008)	1497	31	5.86	+	5.29	3.66e-15	2.88e-11
regulation of angiogenesis (GO:0045765)	291	6	1.14	+	5.27	0.00102	0.0561
osteoblast differentiation (GO:0001649)	97	2	0.38	+	5.27	0.0558	0.793
regulation of receptor signaling pathway via STAT (GO:1904892)	97	2	0.38	+	5.27	0.0558	0.792
chemotaxis (GO:0006935)	486	10	1.9	+	5.26	2.13e-05	0.00252
regulation of fat cell differentiation (GO:0045598)	146	3	0.57	+	5.25	0.0199	0.433
positive regulation of chemotaxis (GO:0050921)	146	3	0.57	+	5.25	0.0199	0.432
regulation of plasma membrane bounded cell projection assembly (GO:0120032)	195	4	0.76	+	5.24	0.00738	0.248
generation of neurons (GO:0048699)	1366	28	5.34	+	5.24	1.53e-13	8.06e-10
maintenance of protein location (GO:0045185)	98	2	0.38	+	5.22	0.0568	0.805
regulation of glycolytic process (GO:0006110)	49	1	0.19	+	5.22	0.175	1
fear response (GO:0042596)	49	1	0.19	+	5.22	0.175	1
negative regulation of mitochondrion organization (GO:0010823)	49	1	0.19	+	5.22	0.175	1
positive regulation of cell morphogenesis involved in differentiation (GO:0010770)	98	2	0.38	+	5.22	0.0568	0.805
taxis (GO:0042330)	491	10	1.92	+	5.21	2.32e-05	0.00273
camera-type eye development (GO:0043010)	344	7	1.35	+	5.20	0.000419	0.0282
regulation of vasculature development (GO:1901342)	295	6	1.15	+	5.20	0.0011	0.0592
regulation of cell projection assembly (GO:0060491)	197	4	0.77	+	5.19	0.00764	0.255
negative regulation of cell motility (GO:2000146)	296	6	1.16	+	5.18	0.00112	0.0592
response to mechanical stimulus (GO:0009612)	148	3	0.58	+	5.18	0.0206	0.446
glucose homeostasis (GO:0042593)	198	4	0.77	+	5.17	0.00778	0.258
positive regulation of lipid biosynthetic process (GO:0046889)	99	2	0.39	+	5.17	0.0578	0.805
positive regulation of growth (GO:0045927)	298	6	1.17	+	5.15	0.00116	0.0606
cell morphogenesis (GO:0000902)	746	15	2.92	+	5.14	2.02e-07	5.88e-05
carbohydrate homeostasis (GO:0033500)	199	4	0.78	+	5.14	0.00791	0.252
regulation of growth (GO:0040008)	699	14	2.73	+	5.12	5.65e-07	0.000151
sensory organ morphogenesis (GO:0090596)	300	6	1.17	+	5.11	0.0012	0.0623
glycogen metabolic process (GO:0005977)	50	1	0.2	+	5.11	0.178	1
positive regulation of reproductive process (GO:2000243)	100	2	0.39	+	5.11	0.0588	0.817
export across plasma membrane (GO:0140115)	50	1	0.2	+	5.11	0.178	1
cellular glucan metabolic process (GO:0006073)	50	1	0.2	+	5.11	0.178	1
glucan metabolic process (GO:0044042)	50	1	0.2	+	5.11	0.178	1
L-amino acid transport (GO:0015807)	50	1	0.2	+	5.11	0.178	1
negative regulation of cell growth (GO:0030308)	200	4	0.78	+	5.11	0.00805	0.254
endosome to lysosome transport (GO:0008333)	50	1	0.2	+	5.11	0.178	1
artery development (GO:0060840)	100	2	0.39	+	5.11	0.0588	0.816
skeletal muscle organ development (GO:0060538)	151	3	0.59	+	5.08	0.0217	0.464
negative regulation of extrinsic apoptotic signaling pathway (GO:2001237)	101	2	0.4	+	5.06	0.0599	0.828
segmentation (GO:0035282)	101	2	0.4	+	5.06	0.0599	0.827
positive regulation of small molecule metabolic process (GO:0062013)	152	3	0.59	+	5.05	0.0221	0.472
cellular component morphogenesis (GO:0032989)	610	12	2.39	+	5.03	4.72e-06	0.00079
negative regulation of cellular component movement (GO:0051271)	305	6	1.19	+	5.03	0.0013	0.0656
positive regulation of glial cell differentiation (GO:0045687)	51	1	0.2	+	5.01	0.181	1
regulation of posttranscriptional gene silencing (GO:0060147)	51	1	0.2	+	5.01	0.181	1
mitochondrion localization (GO:0051646)	51	1	0.2	+	5.01	0.181	1
genitalia development (GO:0048806)	51	1	0.2	+	5.01	0.181	1
regulation of triglyceride metabolic process (GO:0090207)	51	1	0.2	+	5.01	0.181	1
regulation of microtubule cytoskeleton organization (GO:0070507)	153	3	0.6	+	5.01	0.0225	0.478
developmental cell growth (GO:0048588)	102	2	0.4	+	5.01	0.0609	0.823
establishment of spindle localization (GO:0051293)	51	1	0.2	+	5.01	0.181	1
response to estrogen (GO:0043627)	51	1	0.2	+	5.01	0.181	1
neuron projection development (GO:0031175)	715	14	2.8	+	5.01	7.38e-07	0.000184
positive regulation of epithelial cell migration (GO:0010634)	155	3	0.61	+	4.95	0.0232	0.472
regulation of cellular component size (GO:0032535)	414	8	1.62	+	4.94	0.000227	0.0174
regulation of actin cytoskeleton organization (GO:0032956)	364	7	1.42	+	4.92	0.000585	0.0368
regulation of transcription regulatory region DNA binding (GO:2000677)	52	1	0.2	+	4.92	0.184	1
chloride transmembrane transport (GO:1902476)	52	1	0.2	+	4.92	0.184	1
CD4-positive, alpha-beta T cell activation (GO:0035710)	52	1	0.2	+	4.92	0.184	1
positive regulation of potassium ion transport (GO:0043268)	52	1	0.2	+	4.92	0.184	1
microtubule polymerization or depolymerization (GO:0031109)	52	1	0.2	+	4.92	0.184	1
cellular amino acid biosynthetic process (GO:0008652)	52	1	0.2	+	4.92	0.184	1
regulation of gene silencing by RNA (GO:0060966)	52	1	0.2	+	4.92	0.184	1
tissue regeneration (GO:0042246)	52	1	0.2	+	4.92	0.184	1
establishment or maintenance of apical/basal cell polarity (GO:0035088)	52	1	0.2	+	4.92	0.184	1
establishment or maintenance of bipolar cell polarity (GO:0061245)	52	1	0.2	+	4.92	0.184	1
negative regulation of cell differentiation (GO:0045596)	681	13	2.66	+	4.88	2.53e-06	0.000497
cell morphogenesis involved in differentiation (GO:0000904)	577	11	2.26	+	4.87	1.62e-05	0.00204
development of primary female sexual characteristics (GO:0046545)	105	2	0.41	+	4.87	0.0641	0.86
negative regulation of developmental process (GO:0051093)	952	18	3.72	+	4.83	2.56e-08	1.12e-05
negative regulation of oxidative stress-induced cell death (GO:1903202)	53	1	0.21	+	4.82	0.187	1
positive regulation of myeloid cell differentiation (GO:0045639)	106	2	0.41	+	4.82	0.0651	0.865
cellular response to oxygen levels (GO:0071453)	106	2	0.41	+	4.82	0.0651	0.864
morphogenesis of an epithelial sheet (GO:0002011)	53	1	0.21	+	4.82	0.187	1
cellular protein complex disassembly (GO:0043624)	53	1	0.21	+	4.82	0.187	1
regulation of microtubule polymerization (GO:0031113)	53	1	0.21	+	4.82	0.187	1
ventricular cardiac muscle tissue morphogenesis (GO:0055010)	53	1	0.21	+	4.82	0.187	1
cardiac conduction (GO:0061337)	53	1	0.21	+	4.82	0.187	1
heart morphogenesis (GO:0003007)	265	5	1.04	+	4.82	0.00395	0.152
regulation of cell growth (GO:0001558)	427	8	1.67	+	4.79	0.000279	0.0204
regulation of actomyosin structure organization (GO:0110020)	107	2	0.42	+	4.78	0.0662	0.878
striated muscle tissue development (GO:0014706)	321	6	1.26	+	4.78	0.00168	0.0804
mammary gland morphogenesis (GO:0060443)	54	1	0.21	+	4.73	0.191	1
cell differentiation in spinal cord (GO:0021515)	54	1	0.21	+	4.73	0.191	1
presynaptic endocytosis (GO:0140238)	54	1	0.21	+	4.73	0.191	1
positive regulation of smooth muscle cell proliferation (GO:0048661)	108	2	0.42	+	4.73	0.0673	0.889
synaptic vesicle endocytosis (GO:0048488)	54	1	0.21	+	4.73	0.191	1
positive regulation of epithelial cell differentiation (GO:0030858)	54	1	0.21	+	4.73	0.191	1
regulation of mitochondrial membrane permeability (GO:0046902)	54	1	0.21	+	4.73	0.191	1
positive regulation of response to cytokine stimulus (GO:0060760)	54	1	0.21	+	4.73	0.191	1
positive regulation of neuron projection development (GO:0010976)	217	4	0.85	+	4.71	0.0106	0.318
positive regulation of hormone secretion (GO:0046887)	163	3	0.64	+	4.71	0.0264	0.53
developmental maturation (GO:0021700)	272	5	1.06	+	4.70	0.0044	0.166
protein localization to cell junction (GO:1902414)	109	2	0.43	+	4.69	0.0683	0.885
positive regulation of protein localization to membrane (GO:1905477)	109	2	0.43	+	4.69	0.0683	0.884
negative regulation of angiogenesis (GO:0016525)	109	2	0.43	+	4.69	0.0683	0.884
positive regulation of cell differentiation (GO:0045597)	927	17	3.63	+	4.69	1.03e-07	3.44e-05
muscle structure development (GO:0061061)	491	9	1.92	+	4.69	0.000135	0.0115
positive regulation of locomotion (GO:0040017)	602	11	2.35	+	4.67	2.39e-05	0.00279
connective tissue development (GO:0061448)	219	4	0.86	+	4.67	0.0109	0.325
negative regulation of osteoblast differentiation (GO:0045668)	55	1	0.22	+	4.65	0.194	1
regulation of DNA replication (GO:0006275)	110	2	0.43	+	4.65	0.0694	0.894
response to estradiol (GO:0032355)	55	1	0.22	+	4.65	0.194	1
regulation of carbohydrate biosynthetic process (GO:0043255)	110	2	0.43	+	4.65	0.0694	0.893
regulation of long-term synaptic potentiation (GO:1900271)	55	1	0.22	+	4.65	0.194	1
ovulation cycle (GO:0042698)	55	1	0.22	+	4.65	0.194	1
negative regulation of BMP signaling pathway (GO:0030514)	55	1	0.22	+	4.65	0.194	1
regulation of cardiac muscle cell apoptotic process (GO:0010665)	55	1	0.22	+	4.65	0.194	1
regulation of dendritic spine morphogenesis (GO:0061001)	55	1	0.22	+	4.65	0.194	1
sex differentiation (GO:0007548)	276	5	1.08	+	4.63	0.00468	0.173
regulation of cell-substrate adhesion (GO:0010810)	221	4	0.86	+	4.63	0.0113	0.332
eye development (GO:0001654)	387	7	1.51	+	4.62	0.000836	0.0487
embryonic placenta development (GO:0001892)	111	2	0.43	+	4.61	0.0705	0.905
negative regulation of blood vessel morphogenesis (GO:2000181)	111	2	0.43	+	4.61	0.0705	0.904
regulation of actin filament bundle assembly (GO:0032231)	111	2	0.43	+	4.61	0.0705	0.904
regulation of postsynapse organization (GO:0099175)	111	2	0.43	+	4.61	0.0705	0.903
striated muscle cell differentiation (GO:0051146)	222	4	0.87	+	4.61	0.0115	0.333
muscle organ development (GO:0007517)	278	5	1.09	+	4.60	0.00482	0.176
visual system development (GO:0150063)	390	7	1.53	+	4.59	0.000874	0.0508
collagen metabolic process (GO:0032963)	56	1	0.22	+	4.57	0.197	1
regulation of granulocyte chemotaxis (GO:0071622)	56	1	0.22	+	4.57	0.197	1
biological process involved in intraspecies interaction between organisms (GO:0051703)	56	1	0.22	+	4.57	0.197	1
spindle localization (GO:0051653)	56	1	0.22	+	4.57	0.197	1
positive regulation of stress fiber assembly (GO:0051496)	56	1	0.22	+	4.57	0.197	1
negative regulation of vasculature development (GO:1901343)	112	2	0.44	+	4.57	0.0716	0.915
thymus development (GO:0048538)	56	1	0.22	+	4.57	0.197	1
response to reactive oxygen species (GO:0000302)	168	3	0.66	+	4.57	0.0286	0.543
glutamine family amino acid metabolic process (GO:0009064)	56	1	0.22	+	4.57	0.197	1
social behavior (GO:0035176)	56	1	0.22	+	4.57	0.197	1
body fluid secretion (GO:0007589)	56	1	0.22	+	4.57	0.197	1
regulation of pri-miRNA transcription by RNA polymerase II (GO:1902893)	56	1	0.22	+	4.57	0.197	1
sensory system development (GO:0048880)	394	7	1.54	+	4.54	0.000927	0.0521
regulation of smooth muscle cell proliferation (GO:0048660)	169	3	0.66	+	4.54	0.029	0.55
regulation of endothelial cell migration (GO:0010594)	169	3	0.66	+	4.54	0.029	0.549
positive regulation of cell migration (GO:0030335)	564	10	2.21	+	4.53	7.37e-05	0.00708
regulation of protein localization to plasma membrane (GO:1903076)	113	2	0.44	+	4.53	0.0727	0.918
muscle tissue development (GO:0060537)	340	6	1.33	+	4.51	0.00224	0.102
negative regulation of lymphocyte differentiation (GO:0045620)	57	1	0.22	+	4.49	0.2	1
response to cAMP (GO:0051591)	57	1	0.22	+	4.49	0.2	1
multicellular organismal signaling (GO:0035637)	114	2	0.45	+	4.49	0.0738	0.931
synaptic vesicle exocytosis (GO:0016079)	57	1	0.22	+	4.49	0.2	1
cell growth (GO:0016049)	114	2	0.45	+	4.49	0.0738	0.93
negative regulation of cellular component organization (GO:0051129)	744	13	2.91	+	4.47	6.55e-06	0.00101
regulation of cellular response to growth factor stimulus (GO:0090287)	288	5	1.13	+	4.44	0.00559	0.199
regulation of stem cell differentiation (GO:2000736)	58	1	0.23	+	4.41	0.203	1
sprouting angiogenesis (GO:0002040)	58	1	0.23	+	4.41	0.203	1
axonal transport (GO:0098930)	58	1	0.23	+	4.41	0.203	1
regulation of myelination (GO:0031641)	58	1	0.23	+	4.41	0.203	1
regulation of striated muscle cell apoptotic process (GO:0010662)	58	1	0.23	+	4.41	0.203	1
negative regulation of muscle cell apoptotic process (GO:0010656)	58	1	0.23	+	4.41	0.203	1
heart valve development (GO:0003170)	58	1	0.23	+	4.41	0.203	1
anatomical structure maturation (GO:0071695)	233	4	0.91	+	4.39	0.0135	0.358
nervous system development (GO:0007399)	2098	36	8.21	+	4.39	3.06e-15	4.82e-11
negative regulation of apoptotic signaling pathway (GO:2001234)	234	4	0.92	+	4.37	0.0137	0.362
multicellular organism growth (GO:0035264)	117	2	0.46	+	4.37	0.0772	0.962
positive regulation of cell motility (GO:2000147)	587	10	2.3	+	4.36	0.000102	0.00915
regulation of actin filament-based process (GO:0032970)	411	7	1.61	+	4.35	0.00118	0.0618
regulation of cytoskeleton organization (GO:0051493)	529	9	2.07	+	4.35	0.000234	0.0178
dicarboxylic acid transport (GO:0006835)	59	1	0.23	+	4.33	0.206	1
positive regulation of cell-matrix adhesion (GO:0001954)	59	1	0.23	+	4.33	0.206	1
long-term synaptic potentiation (GO:0060291)	59	1	0.23	+	4.33	0.206	1
blastocyst formation (GO:0001825)	59	1	0.23	+	4.33	0.206	1
protein K48-linked ubiquitination (GO:0070936)	59	1	0.23	+	4.33	0.206	1
regulation of interleukin-12 production (GO:0032655)	59	1	0.23	+	4.33	0.206	1
regulation of DNA biosynthetic process (GO:2000278)	118	2	0.46	+	4.33	0.0783	0.974
negative regulation of smooth muscle cell proliferation (GO:0048662)	59	1	0.23	+	4.33	0.206	1
carbohydrate derivative transport (GO:1901264)	59	1	0.23	+	4.33	0.206	1
regulation of carbohydrate catabolic process (GO:0043470)	59	1	0.23	+	4.33	0.206	1
positive regulation of DNA binding (GO:0043388)	59	1	0.23	+	4.33	0.206	1
signal release (GO:0023061)	177	3	0.69	+	4.33	0.0326	0.583
positive regulation of developmental process (GO:0051094)	1419	24	5.55	+	4.32	6.5e-10	4.88e-07
negative regulation of transcription, DNA-templated (GO:0045892)	1242	21	4.86	+	4.32	9.83e-09	5.33e-06
cell-cell signaling by wnt (GO:0198738)	237	4	0.93	+	4.32	0.0142	0.373
Wnt signaling pathway (GO:0016055)	237	4	0.93	+	4.32	0.0142	0.373
negative regulation of nucleic acid-templated transcription (GO:1903507)	1246	21	4.87	+	4.31	1.04e-08	5.45e-06
negative regulation of RNA biosynthetic process (GO:1902679)	1247	21	4.88	+	4.31	1.05e-08	5.35e-06
amino acid transport (GO:0006865)	119	2	0.47	+	4.30	0.0795	0.973
primary neural tube formation (GO:0014020)	119	2	0.47	+	4.30	0.0795	0.972
female sex differentiation (GO:0046660)	119	2	0.47	+	4.30	0.0795	0.972
negative regulation of leukocyte apoptotic process (GO:2000107)	60	1	0.23	+	4.26	0.209	1
regulation of cell cycle arrest (GO:0071156)	60	1	0.23	+	4.26	0.209	1
digestive tract development (GO:0048565)	120	2	0.47	+	4.26	0.0806	0.983
cellular response to hydrogen peroxide (GO:0070301)	60	1	0.23	+	4.26	0.209	1
actin-mediated cell contraction (GO:0070252)	60	1	0.23	+	4.26	0.209	1
negative regulation of actin filament polymerization (GO:0030837)	60	1	0.23	+	4.26	0.209	1
regulation of vascular associated smooth muscle cell proliferation (GO:1904705)	60	1	0.23	+	4.26	0.209	1
photoreceptor cell development (GO:0042461)	60	1	0.23	+	4.26	0.209	1
positive regulation of regulated secretory pathway (GO:1903307)	60	1	0.23	+	4.26	0.209	1
regulation of hormone secretion (GO:0046883)	300	5	1.17	+	4.26	0.00661	0.231
learning (GO:0007612)	180	3	0.7	+	4.26	0.034	0.602
blood vessel development (GO:0001568)	541	9	2.12	+	4.25	0.000275	0.0203
positive regulation of cellular component movement (GO:0051272)	604	10	2.36	+	4.23	0.000129	0.011
regulation of anatomical structure morphogenesis (GO:0022603)	968	16	3.79	+	4.23	1.01e-06	0.000238
energy reserve metabolic process (GO:0006112)	61	1	0.24	+	4.19	0.213	1
cellular component maintenance (GO:0043954)	61	1	0.24	+	4.19	0.213	1
negative regulation of neuron apoptotic process (GO:0043524)	183	3	0.72	+	4.19	0.0354	0.602
learning or memory (GO:0007611)	305	5	1.19	+	4.19	0.00707	0.243
regulation of cell-matrix adhesion (GO:0001952)	123	2	0.48	+	4.16	0.0841	1
regulation of nervous system process (GO:0031644)	185	3	0.72	+	4.15	0.0364	0.617
regulation of myoblast differentiation (GO:0045661)	62	1	0.24	+	4.12	0.216	1
synaptic vesicle recycling (GO:0036465)	62	1	0.24	+	4.12	0.216	1
import into cell (GO:0098657)	186	3	0.73	+	4.12	0.0369	0.624
negative regulation of muscle cell differentiation (GO:0051148)	62	1	0.24	+	4.12	0.216	1
lung alveolus development (GO:0048286)	62	1	0.24	+	4.12	0.216	1
vesicle docking (GO:0048278)	62	1	0.24	+	4.12	0.216	1
regulation of bone remodeling (GO:0046850)	62	1	0.24	+	4.12	0.216	1
regulation of mitochondrion organization (GO:0010821)	124	2	0.48	+	4.12	0.0853	1
negative regulation of cell-substrate adhesion (GO:0010812)	62	1	0.24	+	4.12	0.216	1
ventricular cardiac muscle tissue development (GO:0003229)	62	1	0.24	+	4.12	0.216	1
positive regulation of peptide secretion (GO:0002793)	186	3	0.73	+	4.12	0.0369	0.624
synaptic vesicle cycle (GO:0099504)	125	2	0.49	+	4.09	0.0864	1
regulation of neurotransmitter levels (GO:0001505)	251	4	0.98	+	4.07	0.0172	0.406
positive regulation of macroautophagy (GO:0016239)	63	1	0.25	+	4.06	0.219	1
positive regulation of dendritic spine development (GO:0060999)	63	1	0.25	+	4.06	0.219	1
negative regulation of macromolecule biosynthetic process (GO:0010558)	1452	23	5.68	+	4.05	5.6e-09	3.27e-06
cell migration (GO:0016477)	884	14	3.46	+	4.05	8.49e-06	0.00124
regulation of anatomical structure size (GO:0090066)	570	9	2.23	+	4.04	0.000402	0.0274
positive regulation of supramolecular fiber organization (GO:1902905)	190	3	0.74	+	4.04	0.0389	0.633
regulation of supramolecular fiber organization (GO:1902903)	380	6	1.49	+	4.04	0.00386	0.161
vasculature development (GO:0001944)	571	9	2.23	+	4.03	0.000407	0.0276
positive regulation of cysteine-type endopeptidase activity involved in apoptotic process (GO:0043280)	127	2	0.5	+	4.03	0.0888	1
determination of left/right symmetry (GO:0007368)	128	2	0.5	+	3.99	0.09	1
cellular response to ionizing radiation (GO:0071479)	64	1	0.25	+	3.99	0.222	1
response to calcium ion (GO:0051592)	128	2	0.5	+	3.99	0.09	1
positive regulation of mitochondrion organization (GO:0010822)	64	1	0.25	+	3.99	0.222	1
mammary gland epithelium development (GO:0061180)	64	1	0.25	+	3.99	0.222	1
negative regulation of RNA metabolic process (GO:0051253)	1347	21	5.27	+	3.99	3.96e-08	1.48e-05
positive regulation of peptidyl-serine phosphorylation (GO:0033138)	129	2	0.5	+	3.96	0.0911	1
regulation of protein-containing complex disassembly (GO:0043244)	129	2	0.5	+	3.96	0.0911	1
cell development (GO:0048468)	1810	28	7.08	+	3.96	1.21e-10	1.74e-07
morphogenesis of an epithelium (GO:0002009)	519	8	2.03	+	3.94	0.000997	0.0551
regulation of protein localization to membrane (GO:1905475)	195	3	0.76	+	3.93	0.0415	0.669
epithelial to mesenchymal transition (GO:0001837)	65	1	0.25	+	3.93	0.225	1
lymphocyte activation involved in immune response (GO:0002285)	130	2	0.51	+	3.93	0.0923	1
lymphocyte homeostasis (GO:0002260)	65	1	0.25	+	3.93	0.225	1
ribonucleoprotein complex export from nucleus (GO:0071426)	65	1	0.25	+	3.93	0.225	1
endothelial cell migration (GO:0043542)	65	1	0.25	+	3.93	0.225	1
mitotic cytokinesis (GO:0000281)	65	1	0.25	+	3.93	0.225	1
regulation of circadian rhythm (GO:0042752)	130	2	0.51	+	3.93	0.0923	1
regulation of glucose metabolic process (GO:0010906)	130	2	0.51	+	3.93	0.0923	1
cell adhesion (GO:0007155)	846	13	3.31	+	3.93	2.53e-05	0.0029
regulation of cell morphogenesis (GO:0022604)	326	5	1.28	+	3.92	0.00926	0.285
negative regulation of cellular macromolecule biosynthetic process (GO:2000113)	1436	22	5.62	+	3.92	2.37e-08	1.07e-05
regulation of JNK cascade (GO:0046328)	131	2	0.51	+	3.90	0.0935	1
regulation of multicellular organismal development (GO:2000026)	1446	22	5.66	+	3.89	2.68e-08	1.14e-05
biological adhesion (GO:0022610)	856	13	3.35	+	3.88	2.85e-05	0.00323
cellular iron ion homeostasis (GO:0006879)	66	1	0.26	+	3.87	0.228	1
transmission of nerve impulse (GO:0019226)	66	1	0.26	+	3.87	0.228	1
JNK cascade (GO:0007254)	66	1	0.26	+	3.87	0.228	1
cell redox homeostasis (GO:0045454)	66	1	0.26	+	3.87	0.228	1
alpha-amino acid catabolic process (GO:1901606)	66	1	0.26	+	3.87	0.228	1
ribonucleoprotein complex localization (GO:0071166)	66	1	0.26	+	3.87	0.228	1
regulation of ossification (GO:0030278)	132	2	0.52	+	3.87	0.0947	1
cardiocyte differentiation (GO:0035051)	132	2	0.52	+	3.87	0.0947	1
cellular response to growth factor stimulus (GO:0071363)	396	6	1.55	+	3.87	0.0047	0.173
digestive system development (GO:0055123)	133	2	0.52	+	3.84	0.0959	1
male gonad development (GO:0008584)	133	2	0.52	+	3.84	0.0959	1
neural tube formation (GO:0001841)	134	2	0.52	+	3.82	0.0971	1
negative regulation of reproductive process (GO:2000242)	67	1	0.26	+	3.82	0.231	1
maintenance of protein location in cell (GO:0032507)	67	1	0.26	+	3.82	0.231	1
positive regulation of actin filament bundle assembly (GO:0032233)	67	1	0.26	+	3.82	0.231	1
determination of bilateral symmetry (GO:0009855)	134	2	0.52	+	3.82	0.0971	1
receptor internalization (GO:0031623)	67	1	0.26	+	3.82	0.231	1
development of primary male sexual characteristics (GO:0046546)	134	2	0.52	+	3.82	0.0971	1
regulation of peptide secretion (GO:0002791)	335	5	1.31	+	3.82	0.0103	0.311
developmental growth involved in morphogenesis (GO:0060560)	134	2	0.52	+	3.82	0.0971	1
negative regulation of biosynthetic process (GO:0009890)	1551	23	6.07	+	3.79	1.91e-08	8.87e-06
specification of symmetry (GO:0009799)	135	2	0.53	+	3.79	0.0984	1
establishment or maintenance of cell polarity (GO:0007163)	203	3	0.79	+	3.78	0.0458	0.714
negative regulation of organelle organization (GO:0010639)	339	5	1.33	+	3.77	0.0108	0.323
regulation of membrane permeability (GO:0090559)	68	1	0.27	+	3.76	0.234	1
inorganic anion transmembrane transport (GO:0098661)	68	1	0.27	+	3.76	0.234	1
regulation of lymphocyte apoptotic process (GO:0070228)	68	1	0.27	+	3.76	0.234	1
positive regulation of protein serine/threonine kinase activity (GO:0071902)	273	4	1.07	+	3.75	0.0226	0.48
response to growth factor (GO:0070848)	410	6	1.6	+	3.74	0.00555	0.198
cognition (GO:0050890)	342	5	1.34	+	3.74	0.0112	0.33
negative regulation of cellular biosynthetic process (GO:0031327)	1508	22	5.9	+	3.73	5.62e-08	1.97e-05
animal organ morphogenesis (GO:0009887)	1029	15	4.02	+	3.73	1.04e-05	0.00144
regulation of cell differentiation (GO:0045595)	1581	23	6.18	+	3.72	2.73e-08	1.13e-05
muscle cell differentiation (GO:0042692)	275	4	1.08	+	3.72	0.0231	0.489
regulation of actin filament organization (GO:0110053)	276	4	1.08	+	3.71	0.0234	0.475
neuron projection extension (GO:1990138)	69	1	0.27	+	3.71	0.237	1
vesicle-mediated transport in synapse (GO:0099003)	138	2	0.54	+	3.71	0.102	1
cardiac muscle tissue morphogenesis (GO:0055008)	69	1	0.27	+	3.71	0.237	1
alpha-beta T cell differentiation (GO:0046632)	69	1	0.27	+	3.71	0.237	1
negative regulation of nucleobase-containing compound metabolic process (GO:0045934)	1455	21	5.69	+	3.69	1.45e-07	4.39e-05
positive regulation of cytoskeleton organization (GO:0051495)	208	3	0.81	+	3.69	0.0486	0.734
protein-containing complex localization (GO:0031503)	208	3	0.81	+	3.69	0.0486	0.733
tissue morphogenesis (GO:0048729)	625	9	2.44	+	3.68	0.000775	0.0457
potassium ion transmembrane transport (GO:0071805)	139	2	0.54	+	3.68	0.103	1
negative regulation of protein-containing complex assembly (GO:0031333)	139	2	0.54	+	3.68	0.103	1
positive regulation of MAP kinase activity (GO:0043406)	209	3	0.82	+	3.67	0.0491	0.738
circadian regulation of gene expression (GO:0032922)	70	1	0.27	+	3.65	0.24	1
chondrocyte differentiation (GO:0002062)	70	1	0.27	+	3.65	0.24	1
negative regulation of reactive oxygen species metabolic process (GO:2000378)	70	1	0.27	+	3.65	0.24	1
pyruvate metabolic process (GO:0006090)	70	1	0.27	+	3.65	0.24	1
neuromuscular process (GO:0050905)	140	2	0.55	+	3.65	0.104	1
embryonic pattern specification (GO:0009880)	70	1	0.27	+	3.65	0.24	1
regulation of morphogenesis of an epithelium (GO:1905330)	70	1	0.27	+	3.65	0.24	1
neural retina development (GO:0003407)	70	1	0.27	+	3.65	0.24	1
organelle localization (GO:0051640)	495	7	1.94	+	3.62	0.00334	0.142
peripheral nervous system development (GO:0007422)	71	1	0.28	+	3.60	0.243	1
somitogenesis (GO:0001756)	71	1	0.28	+	3.60	0.243	1
positive regulation of nucleocytoplasmic transport (GO:0046824)	71	1	0.28	+	3.60	0.243	1
visual learning (GO:0008542)	71	1	0.28	+	3.60	0.243	1
female pregnancy (GO:0007565)	143	2	0.56	+	3.58	0.108	1
positive regulation of cysteine-type endopeptidase activity (GO:2001056)	144	2	0.56	+	3.55	0.109	1
positive regulation of muscle cell differentiation (GO:0051149)	72	1	0.28	+	3.55	0.246	1
regulation of muscle cell differentiation (GO:0051147)	144	2	0.56	+	3.55	0.109	1
regulation of gene silencing (GO:0060968)	72	1	0.28	+	3.55	0.246	1
regulation of cell migration (GO:0030334)	940	13	3.68	+	3.54	7.4e-05	0.00706
negative regulation of multicellular organismal process (GO:0051241)	1087	15	4.25	+	3.53	1.98e-05	0.00242
locomotion (GO:0040011)	1232	17	4.82	+	3.53	5.07e-06	0.000823
establishment of vesicle localization (GO:0051650)	145	2	0.57	+	3.53	0.111	1
cell junction organization (GO:0034330)	509	7	1.99	+	3.52	0.00389	0.161
cell surface receptor signaling pathway involved in cell-cell signaling (GO:1905114)	291	4	1.14	+	3.51	0.0277	0.531
anatomical structure morphogenesis (GO:0009653)	2260	31	8.84	+	3.51	1.73e-10	2.1e-07
homeostasis of number of cells (GO:0048872)	292	4	1.14	+	3.50	0.028	0.534
positive regulation of ERK1 and ERK2 cascade (GO:0070374)	219	3	0.86	+	3.50	0.055	0.784
respiratory electron transport chain (GO:0022904)	73	1	0.29	+	3.50	0.249	1
localization of cell (GO:0051674)	1023	14	4	+	3.50	4.25e-05	0.00446
cell motility (GO:0048870)	1023	14	4	+	3.50	4.25e-05	0.00443
blood vessel morphogenesis (GO:0048514)	439	6	1.72	+	3.49	0.00765	0.255
negative regulation of cell adhesion (GO:0007162)	293	4	1.15	+	3.49	0.0283	0.538
positive regulation of response to wounding (GO:1903036)	74	1	0.29	+	3.46	0.252	1
positive regulation of DNA biosynthetic process (GO:2000573)	74	1	0.29	+	3.46	0.252	1
regulation of protein secretion (GO:0050708)	296	4	1.16	+	3.46	0.0292	0.553
positive regulation of MAPK cascade (GO:0043410)	518	7	2.03	+	3.46	0.00428	0.163
regulation of muscle hypertrophy (GO:0014743)	74	1	0.29	+	3.46	0.252	1
exocytosis (GO:0006887)	222	3	0.87	+	3.46	0.0568	0.805
regulation of locomotion (GO:0040012)	1038	14	4.06	+	3.45	4.97e-05	0.00504
cardiac muscle contraction (GO:0060048)	75	1	0.29	+	3.41	0.255	1
RNA export from nucleus (GO:0006405)	75	1	0.29	+	3.41	0.255	1
cellular polysaccharide metabolic process (GO:0044264)	75	1	0.29	+	3.41	0.255	1
visual behavior (GO:0007632)	75	1	0.29	+	3.41	0.255	1
development of primary sexual characteristics (GO:0045137)	225	3	0.88	+	3.41	0.0587	0.815
sensory organ development (GO:0007423)	603	8	2.36	+	3.39	0.00254	0.113
negative regulation of response to external stimulus (GO:0032102)	377	5	1.47	+	3.39	0.0164	0.39
mammary gland development (GO:0030879)	151	2	0.59	+	3.39	0.118	1
anterior/posterior pattern specification (GO:0009952)	227	3	0.89	+	3.38	0.0599	0.828
organelle transport along microtubule (GO:0072384)	76	1	0.3	+	3.36	0.258	1
cellular glucose homeostasis (GO:0001678)	76	1	0.3	+	3.36	0.258	1
cellular response to interleukin-1 (GO:0071347)	76	1	0.3	+	3.36	0.258	1
biological process involved in interaction with host (GO:0051701)	76	1	0.3	+	3.36	0.258	1
organelle localization by membrane tethering (GO:0140056)	76	1	0.3	+	3.36	0.258	1
positive regulation of JUN kinase activity (GO:0043507)	76	1	0.3	+	3.36	0.258	1
G1/S transition of mitotic cell cycle (GO:0000082)	76	1	0.3	+	3.36	0.258	1
cellular response to alcohol (GO:0097306)	76	1	0.3	+	3.36	0.258	1
axo-dendritic transport (GO:0008088)	76	1	0.3	+	3.36	0.258	1
epithelial cell development (GO:0002064)	228	3	0.89	+	3.36	0.0606	0.836
regulation of protein polymerization (GO:0032271)	228	3	0.89	+	3.36	0.0606	0.835
regulation of cell motility (GO:2000145)	990	13	3.87	+	3.36	0.000124	0.0107
ossification (GO:0001503)	229	3	0.9	+	3.35	0.0612	0.826
regulation of Wnt signaling pathway (GO:0030111)	307	4	1.2	+	3.33	0.0327	0.584
cytokine production (GO:0001816)	154	2	0.6	+	3.32	0.122	1
positive regulation of gliogenesis (GO:0014015)	77	1	0.3	+	3.32	0.26	1
peptidyl-threonine phosphorylation (GO:0018107)	77	1	0.3	+	3.32	0.26	1
positive regulation of small GTPase mediated signal transduction (GO:0051057)	77	1	0.3	+	3.32	0.26	1
electron transport chain (GO:0022900)	77	1	0.3	+	3.32	0.26	1
odontogenesis of dentin-containing tooth (GO:0042475)	77	1	0.3	+	3.32	0.26	1
behavior (GO:0007610)	694	9	2.71	+	3.32	0.0016	0.0775
embryonic epithelial tube formation (GO:0001838)	155	2	0.61	+	3.30	0.123	1
cell projection organization (GO:0030030)	1164	15	4.55	+	3.29	4.35e-05	0.0045
regulation of oxidative stress-induced cell death (GO:1903201)	78	1	0.31	+	3.28	0.263	1
activation of cysteine-type endopeptidase activity involved in apoptotic process (GO:0006919)	78	1	0.31	+	3.28	0.263	1
cell cycle G1/S phase transition (GO:0044843)	78	1	0.31	+	3.28	0.263	1
polysaccharide metabolic process (GO:0005976)	78	1	0.31	+	3.28	0.263	1
cellular amino acid catabolic process (GO:0009063)	78	1	0.31	+	3.28	0.263	1
amino acid transmembrane transport (GO:0003333)	78	1	0.31	+	3.28	0.263	1
regulation of ERK1 and ERK2 cascade (GO:0070372)	313	4	1.22	+	3.27	0.0348	0.594
positive regulation of protein secretion (GO:0050714)	157	2	0.61	+	3.26	0.126	1
anatomical structure formation involved in morphogenesis (GO:0048646)	947	12	3.7	+	3.24	0.000319	0.0225
positive regulation of cell division (GO:0051781)	79	1	0.31	+	3.24	0.266	1
protein tetramerization (GO:0051262)	79	1	0.31	+	3.24	0.266	1
negative regulation of ERK1 and ERK2 cascade (GO:0070373)	79	1	0.31	+	3.24	0.266	1
response to alkaloid (GO:0043279)	79	1	0.31	+	3.24	0.266	1
plasma membrane bounded cell projection organization (GO:0120036)	1108	14	4.33	+	3.23	9.94e-05	0.00899
regulation of epithelial cell migration (GO:0010632)	238	3	0.93	+	3.22	0.067	0.887
organic hydroxy compound biosynthetic process (GO:1901617)	159	2	0.62	+	3.22	0.129	1
skin development (GO:0043588)	239	3	0.93	+	3.21	0.0677	0.893
regulation of vasoconstriction (GO:0019229)	80	1	0.31	+	3.20	0.269	1
integrin-mediated signaling pathway (GO:0007229)	80	1	0.31	+	3.20	0.269	1
canonical Wnt signaling pathway (GO:0060070)	80	1	0.31	+	3.20	0.269	1
mitochondrial transmembrane transport (GO:1990542)	80	1	0.31	+	3.20	0.269	1
stress-activated MAPK cascade (GO:0051403)	80	1	0.31	+	3.20	0.269	1
male sex differentiation (GO:0046661)	160	2	0.63	+	3.20	0.13	1
regulation of canonical Wnt signaling pathway (GO:0060828)	240	3	0.94	+	3.20	0.0684	0.883
epithelial tube formation (GO:0072175)	161	2	0.63	+	3.18	0.131	1
cellular response to metal ion (GO:0071248)	161	2	0.63	+	3.18	0.131	1
movement of cell or subcellular component (GO:0006928)	1454	18	5.69	+	3.17	1.13e-05	0.0015
muscle tissue morphogenesis (GO:0060415)	81	1	0.32	+	3.16	0.272	1
potassium ion transport (GO:0006813)	162	2	0.63	+	3.16	0.133	1
response to retinoic acid (GO:0032526)	81	1	0.32	+	3.16	0.272	1
embryonic organ morphogenesis (GO:0048562)	324	4	1.27	+	3.16	0.0387	0.632
dicarboxylic acid metabolic process (GO:0043648)	81	1	0.32	+	3.16	0.272	1
regulation of purine nucleotide metabolic process (GO:1900542)	81	1	0.32	+	3.16	0.272	1
response to amino acid (GO:0043200)	81	1	0.32	+	3.16	0.272	1
membrane docking (GO:0022406)	81	1	0.32	+	3.16	0.272	1
regulation of cellular component biogenesis (GO:0044087)	974	12	3.81	+	3.15	0.000411	0.0278
angiogenesis (GO:0001525)	325	4	1.27	+	3.15	0.039	0.635
regulation of developmental process (GO:0050793)	2521	31	9.86	+	3.14	2.54e-09	1.6e-06
regulation of cell division (GO:0051302)	163	2	0.64	+	3.14	0.134	1
regulation of cellular component organization (GO:0051128)	2455	30	9.6	+	3.12	5.96e-09	3.35e-06
skeletal system morphogenesis (GO:0048705)	246	3	0.96	+	3.12	0.0724	0.915
regulation of tissue remodeling (GO:0034103)	82	1	0.32	+	3.12	0.275	1
centrosome cycle (GO:0007098)	82	1	0.32	+	3.12	0.275	1
viral life cycle (GO:0019058)	82	1	0.32	+	3.12	0.275	1
regulation of peptidyl-serine phosphorylation (GO:0033135)	164	2	0.64	+	3.12	0.135	1
regulation of nucleotide metabolic process (GO:0006140)	82	1	0.32	+	3.12	0.275	1
cartilage development (GO:0051216)	164	2	0.64	+	3.12	0.135	1
response to wounding (GO:0009611)	328	4	1.28	+	3.12	0.0401	0.651
regulation of bone mineralization (GO:0030500)	82	1	0.32	+	3.12	0.275	1
regulation of dendritic spine development (GO:0060998)	82	1	0.32	+	3.12	0.275	1
positive regulation of multicellular organismal process (GO:0051240)	1565	19	6.12	+	3.10	8.11e-06	0.00119
regulation of extrinsic apoptotic signaling pathway (GO:2001236)	165	2	0.65	+	3.10	0.137	1
positive regulation of endopeptidase activity (GO:0010950)	165	2	0.65	+	3.10	0.137	1
regulation of cellular carbohydrate metabolic process (GO:0010675)	165	2	0.65	+	3.10	0.137	1
regulation of cellular component movement (GO:0051270)	1076	13	4.21	+	3.09	0.000279	0.0204
positive regulation of cell population proliferation (GO:0008284)	995	12	3.89	+	3.08	0.000497	0.032
cellular response to ketone (GO:1901655)	83	1	0.32	+	3.08	0.278	1
positive regulation of actin filament polymerization (GO:0030838)	83	1	0.32	+	3.08	0.278	1
myeloid cell differentiation (GO:0030099)	249	3	0.97	+	3.08	0.0745	0.938
cell junction assembly (GO:0034329)	250	3	0.98	+	3.07	0.0752	0.946
cellular biogenic amine metabolic process (GO:0006576)	84	1	0.33	+	3.04	0.28	1
regulation of synaptic vesicle exocytosis (GO:2000300)	84	1	0.33	+	3.04	0.28	1
inorganic ion import across plasma membrane (GO:0099587)	84	1	0.33	+	3.04	0.28	1
inorganic cation import across plasma membrane (GO:0098659)	84	1	0.33	+	3.04	0.28	1
positive regulation of lipid metabolic process (GO:0045834)	168	2	0.66	+	3.04	0.141	1
negative regulation of neuron death (GO:1901215)	253	3	0.99	+	3.03	0.0773	0.962
neuropeptide signaling pathway (GO:0007218)	85	1	0.33	+	3.01	0.283	1
positive regulation of mitotic cell cycle phase transition (GO:1901992)	85	1	0.33	+	3.01	0.283	1
regulation of microtubule-based process (GO:0032886)	255	3	1	+	3.01	0.0787	0.978
cellular amine metabolic process (GO:0044106)	85	1	0.33	+	3.01	0.283	1
limb morphogenesis (GO:0035108)	170	2	0.66	+	3.01	0.143	1
appendage morphogenesis (GO:0035107)	170	2	0.66	+	3.01	0.143	1
alpha-beta T cell activation (GO:0046631)	85	1	0.33	+	3.01	0.283	1
epithelial cell migration (GO:0010631)	85	1	0.33	+	3.01	0.283	1
protein localization to cell periphery (GO:1990778)	257	3	1.01	+	2.98	0.0802	0.979
modulation of chemical synaptic transmission (GO:0050804)	516	6	2.02	+	2.97	0.0159	0.381
positive regulation of transcription by RNA polymerase II (GO:0045944)	1204	14	4.71	+	2.97	0.000235	0.0178
placenta development (GO:0001890)	172	2	0.67	+	2.97	0.146	1
peptidyl-threonine modification (GO:0018210)	86	1	0.34	+	2.97	0.286	1
maintenance of location (GO:0051235)	172	2	0.67	+	2.97	0.146	1
regulation of actin filament polymerization (GO:0030833)	172	2	0.67	+	2.97	0.146	1
keratinocyte differentiation (GO:0030216)	86	1	0.34	+	2.97	0.286	1
positive regulation of JNK cascade (GO:0046330)	86	1	0.34	+	2.97	0.286	1
regulation of trans-synaptic signaling (GO:0099177)	517	6	2.02	+	2.97	0.0161	0.383
positive regulation of secretion by cell (GO:1903532)	345	4	1.35	+	2.96	0.0468	0.713
response to inorganic substance (GO:0010035)	432	5	1.69	+	2.96	0.0275	0.529
establishment of organelle localization (GO:0051656)	346	4	1.35	+	2.96	0.0472	0.717
positive regulation of intracellular signal transduction (GO:1902533)	953	11	3.73	+	2.95	0.00123	0.0638
rhythmic process (GO:0048511)	260	3	1.02	+	2.95	0.0823	1
chemical synaptic transmission (GO:0007268)	347	4	1.36	+	2.95	0.0476	0.723
anterograde trans-synaptic signaling (GO:0098916)	347	4	1.36	+	2.95	0.0476	0.722
cell differentiation (GO:0030154)	3560	41	13.92	+	2.94	1.02e-11	2.68e-08
tube development (GO:0035295)	956	11	3.74	+	2.94	0.00126	0.0639
multi-multicellular organism process (GO:0044706)	174	2	0.68	+	2.94	0.149	1
DNA replication (GO:0006260)	174	2	0.68	+	2.94	0.149	1
regulation of potassium ion transmembrane transport (GO:1901379)	87	1	0.34	+	2.94	0.289	1
epithelium migration (GO:0090132)	87	1	0.34	+	2.94	0.289	1
positive regulation of peptidase activity (GO:0010952)	174	2	0.68	+	2.94	0.149	1
positive regulation of protein kinase activity (GO:0045860)	435	5	1.7	+	2.94	0.0282	0.538
digestion (GO:0007586)	87	1	0.34	+	2.94	0.289	1
epithelium development (GO:0060429)	1046	12	4.09	+	2.93	0.00077	0.0456
response to oxidative stress (GO:0006979)	349	4	1.37	+	2.93	0.0484	0.733
in utero embryonic development (GO:0001701)	525	6	2.05	+	2.92	0.0172	0.407
urogenital system development (GO:0001655)	351	4	1.37	+	2.91	0.0493	0.74
heart contraction (GO:0060047)	88	1	0.34	+	2.91	0.292	1
cell-substrate adhesion (GO:0031589)	176	2	0.69	+	2.91	0.151	1
regulation of MAPK cascade (GO:0043408)	704	8	2.75	+	2.91	0.00639	0.225
regulation of cellular response to oxidative stress (GO:1900407)	88	1	0.34	+	2.91	0.292	1
iron ion homeostasis (GO:0055072)	88	1	0.34	+	2.91	0.292	1
response to organophosphorus (GO:0046683)	88	1	0.34	+	2.91	0.292	1
somite development (GO:0061053)	88	1	0.34	+	2.91	0.292	1
cellular developmental process (GO:0048869)	3611	41	14.12	+	2.90	1.62e-11	3.65e-08
tissue development (GO:0009888)	1675	19	6.55	+	2.90	2.11e-05	0.00251
positive regulation of cellular component biogenesis (GO:0044089)	529	6	2.07	+	2.90	0.0178	0.415
tube formation (GO:0035148)	177	2	0.69	+	2.89	0.153	1
T cell differentiation (GO:0030217)	177	2	0.69	+	2.89	0.153	1
developmental growth (GO:0048589)	443	5	1.73	+	2.89	0.0302	0.568
positive regulation of phosphorylation (GO:0042327)	889	10	3.48	+	2.88	0.0025	0.112
biomineralization (GO:0110148)	89	1	0.35	+	2.87	0.294	1
negative regulation of response to wounding (GO:1903035)	89	1	0.35	+	2.87	0.294	1
protein polymerization (GO:0051258)	89	1	0.35	+	2.87	0.294	1
biomineral tissue development (GO:0031214)	89	1	0.35	+	2.87	0.294	1
fatty acid transport (GO:0015908)	89	1	0.35	+	2.87	0.294	1
transmembrane receptor protein tyrosine kinase signaling pathway (GO:0007169)	357	4	1.4	+	2.86	0.0518	0.757
positive regulation of protein phosphorylation (GO:0001934)	805	9	3.15	+	2.86	0.00428	0.162
regulation of cation channel activity (GO:2001257)	179	2	0.7	+	2.86	0.155	1
morphogenesis of embryonic epithelium (GO:0016331)	179	2	0.7	+	2.86	0.155	1
phenol-containing compound metabolic process (GO:0018958)	90	1	0.35	+	2.84	0.297	1
post-Golgi vesicle-mediated transport (GO:0006892)	90	1	0.35	+	2.84	0.297	1
regulation of stress-activated MAPK cascade (GO:0032872)	180	2	0.7	+	2.84	0.157	1
tissue migration (GO:0090130)	90	1	0.35	+	2.84	0.297	1
cytoskeleton-dependent cytokinesis (GO:0061640)	90	1	0.35	+	2.84	0.297	1
endothelium development (GO:0003158)	90	1	0.35	+	2.84	0.297	1
regulation of neuron apoptotic process (GO:0043523)	270	3	1.06	+	2.84	0.0898	1
regulation of membrane potential (GO:0042391)	451	5	1.76	+	2.83	0.0323	0.578
protein localization to membrane (GO:0072657)	453	5	1.77	+	2.82	0.0328	0.585
leukocyte activation involved in immune response (GO:0002366)	182	2	0.71	+	2.81	0.16	1
leukocyte homeostasis (GO:0001776)	91	1	0.36	+	2.81	0.3	1
growth (GO:0040007)	455	5	1.78	+	2.81	0.0333	0.593
reproductive structure development (GO:0048608)	455	5	1.78	+	2.81	0.0333	0.593
regulation of small GTPase mediated signal transduction (GO:0051056)	273	3	1.07	+	2.81	0.092	1
adult behavior (GO:0030534)	182	2	0.71	+	2.81	0.16	1
trans-synaptic signaling (GO:0099537)	365	4	1.43	+	2.80	0.0554	0.788
regulation of stress-activated protein kinase signaling cascade (GO:0070302)	183	2	0.72	+	2.79	0.161	1
regulation of cell adhesion (GO:0030155)	733	8	2.87	+	2.79	0.00806	0.254
cell population proliferation (GO:0008283)	550	6	2.15	+	2.79	0.0211	0.452
epithelial tube morphogenesis (GO:0060562)	367	4	1.44	+	2.79	0.0563	0.799
reproductive system development (GO:0061458)	459	5	1.8	+	2.79	0.0344	0.607
enzyme linked receptor protein signaling pathway (GO:0007167)	552	6	2.16	+	2.78	0.0214	0.458
peptidyl-serine phosphorylation (GO:0018105)	184	2	0.72	+	2.78	0.162	1
response to interleukin-1 (GO:0070555)	92	1	0.36	+	2.78	0.303	1
oogenesis (GO:0048477)	92	1	0.36	+	2.78	0.303	1
regulation of JUN kinase activity (GO:0043506)	92	1	0.36	+	2.78	0.303	1
regulation of ATP metabolic process (GO:1903578)	92	1	0.36	+	2.78	0.303	1
actin filament-based movement (GO:0030048)	92	1	0.36	+	2.78	0.303	1
circulatory system development (GO:0072359)	923	10	3.61	+	2.77	0.00326	0.139
mitochondrial transport (GO:0006839)	185	2	0.72	+	2.76	0.164	1
multicellular organismal response to stress (GO:0033555)	93	1	0.36	+	2.75	0.305	1
positive regulation of endothelial cell proliferation (GO:0001938)	93	1	0.36	+	2.75	0.305	1
cell activation involved in immune response (GO:0002263)	186	2	0.73	+	2.75	0.165	1
protein export from nucleus (GO:0006611)	93	1	0.36	+	2.75	0.305	1
cellular response to inorganic substance (GO:0071241)	186	2	0.73	+	2.75	0.165	1
amine metabolic process (GO:0009308)	93	1	0.36	+	2.75	0.305	1
regulation of pattern recognition receptor signaling pathway (GO:0062207)	93	1	0.36	+	2.75	0.305	1
microtubule organizing center organization (GO:0031023)	93	1	0.36	+	2.75	0.305	1
regulation of lipid biosynthetic process (GO:0046890)	186	2	0.73	+	2.75	0.165	1
transmembrane receptor protein serine/threonine kinase signaling pathway (GO:0007178)	187	2	0.73	+	2.73	0.166	1
energy derivation by oxidation of organic compounds (GO:0015980)	187	2	0.73	+	2.73	0.166	1
positive regulation of nucleic acid-templated transcription (GO:1903508)	1499	16	5.86	+	2.73	0.000212	0.0168
positive regulation of transcription, DNA-templated (GO:0045893)	1499	16	5.86	+	2.73	0.000212	0.0167
positive regulation of RNA biosynthetic process (GO:1902680)	1500	16	5.87	+	2.73	0.000214	0.0168
cellular response to BMP stimulus (GO:0071773)	94	1	0.37	+	2.72	0.308	1
response to BMP (GO:0071772)	94	1	0.37	+	2.72	0.308	1
double-strand break repair via homologous recombination (GO:0000724)	94	1	0.37	+	2.72	0.308	1
glucose metabolic process (GO:0006006)	94	1	0.37	+	2.72	0.308	1
heart development (GO:0007507)	565	6	2.21	+	2.72	0.0236	0.479
cellular response to organic cyclic compound (GO:0071407)	377	4	1.47	+	2.71	0.0609	0.823
regulation of neuron death (GO:1901214)	378	4	1.48	+	2.71	0.0613	0.826
nucleobase-containing compound transport (GO:0015931)	189	2	0.74	+	2.71	0.169	1
system development (GO:0048731)	4176	44	16.33	+	2.69	2.15e-11	4.24e-08
regulation of phosphorylation (GO:0042325)	1329	14	5.2	+	2.69	0.000632	0.0392
chloride transport (GO:0006821)	95	1	0.37	+	2.69	0.311	1
regulation of fatty acid metabolic process (GO:0019217)	95	1	0.37	+	2.69	0.311	1
recombinational repair (GO:0000725)	95	1	0.37	+	2.69	0.311	1
regulation of MAP kinase activity (GO:0043405)	285	3	1.11	+	2.69	0.101	1
regulation of actin polymerization or depolymerization (GO:0008064)	190	2	0.74	+	2.69	0.171	1
positive regulation of leukocyte chemotaxis (GO:0002690)	95	1	0.37	+	2.69	0.311	1
negative regulation of nitrogen compound metabolic process (GO:0051172)	2286	24	8.94	+	2.68	4.86e-06	0.000806
cardiac muscle tissue development (GO:0048738)	191	2	0.75	+	2.68	0.172	1
regulation of transcription by RNA polymerase II (GO:0006357)	2396	25	9.37	+	2.67	3.22e-06	0.00061
positive regulation of macromolecule biosynthetic process (GO:0010557)	1727	18	6.75	+	2.66	0.000108	0.0096
regulation of macroautophagy (GO:0016241)	96	1	0.38	+	2.66	0.314	1
positive regulation of phosphorus metabolic process (GO:0010562)	963	10	3.77	+	2.65	0.0044	0.166
positive regulation of phosphate metabolic process (GO:0045937)	963	10	3.77	+	2.65	0.0044	0.166
T cell activation (GO:0042110)	289	3	1.13	+	2.65	0.105	1
positive regulation of cellular biosynthetic process (GO:0031328)	1833	19	7.17	+	2.65	7.18e-05	0.00694
regulation of actin filament length (GO:0030832)	193	2	0.75	+	2.65	0.175	1
actin filament-based process (GO:0030029)	581	6	2.27	+	2.64	0.0266	0.534
secretion (GO:0046903)	485	5	1.9	+	2.64	0.0419	0.676
hair follicle development (GO:0001942)	97	1	0.38	+	2.64	0.316	1
response to hypoxia (GO:0001666)	194	2	0.76	+	2.64	0.176	1
cytokinesis (GO:0000910)	97	1	0.38	+	2.64	0.316	1
positive regulation of cold-induced thermogenesis (GO:0120162)	97	1	0.38	+	2.64	0.316	1
positive regulation of peptidyl-tyrosine phosphorylation (GO:0050731)	194	2	0.76	+	2.64	0.176	1
epithelial cell proliferation (GO:0050673)	97	1	0.38	+	2.64	0.316	1
protein autophosphorylation (GO:0046777)	194	2	0.76	+	2.64	0.176	1
regulation of muscle cell apoptotic process (GO:0010660)	97	1	0.38	+	2.64	0.316	1
regulation of response to oxidative stress (GO:1902882)	97	1	0.38	+	2.64	0.316	1
positive regulation of binding (GO:0051099)	195	2	0.76	+	2.62	0.177	1
morphogenesis of a branching epithelium (GO:0061138)	195	2	0.76	+	2.62	0.177	1
regulation of protein phosphorylation (GO:0001932)	1171	12	4.58	+	2.62	0.00201	0.0927
regulation of apoptotic signaling pathway (GO:2001233)	391	4	1.53	+	2.62	0.0677	0.894
positive regulation of transferase activity (GO:0051347)	587	6	2.3	+	2.61	0.0278	0.533
positive regulation of T cell differentiation (GO:0045582)	98	1	0.38	+	2.61	0.319	1
negative regulation of intrinsic apoptotic signaling pathway (GO:2001243)	98	1	0.38	+	2.61	0.319	1
regulation of muscle adaptation (GO:0043502)	98	1	0.38	+	2.61	0.319	1
stress-activated protein kinase signaling cascade (GO:0031098)	98	1	0.38	+	2.61	0.319	1
animal organ development (GO:0048513)	3146	32	12.3	+	2.60	1.24e-07	3.99e-05
limb development (GO:0060173)	197	2	0.77	+	2.60	0.18	1
regulation of organelle organization (GO:0033043)	1182	12	4.62	+	2.60	0.00217	0.099
appendage development (GO:0048736)	197	2	0.77	+	2.60	0.18	1
positive regulation of biosynthetic process (GO:0009891)	1877	19	7.34	+	2.59	9.84e-05	0.00901
positive regulation of cell cycle phase transition (GO:1901989)	99	1	0.39	+	2.58	0.322	1
mitochondrial membrane organization (GO:0007006)	99	1	0.39	+	2.58	0.322	1
regulation of heart rate (GO:0002027)	99	1	0.39	+	2.58	0.322	1
maintenance of location in cell (GO:0051651)	99	1	0.39	+	2.58	0.322	1
regulation of carbohydrate metabolic process (GO:0006109)	198	2	0.77	+	2.58	0.182	1
response to glucose (GO:0009749)	99	1	0.39	+	2.58	0.322	1
positive regulation of protein binding (GO:0032092)	99	1	0.39	+	2.58	0.322	1
regulation of striated muscle cell differentiation (GO:0051153)	99	1	0.39	+	2.58	0.322	1
regulation of biomineral tissue development (GO:0070167)	99	1	0.39	+	2.58	0.322	1
transition metal ion transport (GO:0000041)	99	1	0.39	+	2.58	0.322	1
positive regulation of exocytosis (GO:0045921)	99	1	0.39	+	2.58	0.322	1
positive regulation of secretion (GO:0051047)	397	4	1.55	+	2.58	0.0707	0.904
regulation of multicellular organismal process (GO:0051239)	2787	28	10.9	+	2.57	1.39e-06	0.000308
embryonic organ development (GO:0048568)	498	5	1.95	+	2.57	0.0461	0.703
multicellular organism development (GO:0007275)	4788	48	18.73	+	2.56	7.01e-12	2.21e-08
heart process (GO:0003015)	100	1	0.39	+	2.56	0.324	1
protein-containing complex disassembly (GO:0032984)	100	1	0.39	+	2.56	0.324	1
lysosomal transport (GO:0007041)	100	1	0.39	+	2.56	0.324	1
regulation of reproductive process (GO:2000241)	200	2	0.78	+	2.56	0.184	1
regulation of leukocyte apoptotic process (GO:2000106)	100	1	0.39	+	2.56	0.324	1
regulation of BMP signaling pathway (GO:0030510)	100	1	0.39	+	2.56	0.324	1
positive regulation of RNA metabolic process (GO:0051254)	1604	16	6.27	+	2.55	0.000452	0.03
positive regulation of cellular component organization (GO:0051130)	1203	12	4.71	+	2.55	0.00251	0.112
response to decreased oxygen levels (GO:0036293)	201	2	0.79	+	2.54	0.186	1
positive regulation of cell communication (GO:0010647)	1709	17	6.68	+	2.54	0.000301	0.0216
synaptic signaling (GO:0099536)	403	4	1.58	+	2.54	0.0738	0.931
cytoskeleton organization (GO:0007010)	1109	11	4.34	+	2.54	0.00398	0.153
positive regulation of signaling (GO:0023056)	1716	17	6.71	+	2.53	0.000316	0.0224
renal system process (GO:0003014)	101	1	0.4	+	2.53	0.327	1
cell chemotaxis (GO:0060326)	202	2	0.79	+	2.53	0.187	1
regulation of biomineralization (GO:0110149)	101	1	0.4	+	2.53	0.327	1
roof of mouth development (GO:0060021)	101	1	0.4	+	2.53	0.327	1
skin epidermis development (GO:0098773)	101	1	0.4	+	2.53	0.327	1
regulation of TOR signaling (GO:0032006)	101	1	0.4	+	2.53	0.327	1
receptor metabolic process (GO:0043112)	101	1	0.4	+	2.53	0.327	1
regeneration (GO:0031099)	101	1	0.4	+	2.53	0.327	1
hair cycle process (GO:0022405)	101	1	0.4	+	2.53	0.327	1
molting cycle process (GO:0022404)	101	1	0.4	+	2.53	0.327	1
positive regulation of kinase activity (GO:0033674)	506	5	1.98	+	2.53	0.0487	0.735
protein localization to plasma membrane (GO:0072659)	203	2	0.79	+	2.52	0.189	1
regulation of system process (GO:0044057)	610	6	2.39	+	2.51	0.0327	0.584
chordate embryonic development (GO:0043009)	815	8	3.19	+	2.51	0.0146	0.378
bone morphogenesis (GO:0060349)	102	1	0.4	+	2.51	0.33	1
negative regulation of cellular response to growth factor stimulus (GO:0090288)	102	1	0.4	+	2.51	0.33	1
response to acid chemical (GO:0001101)	102	1	0.4	+	2.51	0.33	1
response to hexose (GO:0009746)	102	1	0.4	+	2.51	0.33	1
odontogenesis (GO:0042476)	102	1	0.4	+	2.51	0.33	1
female gonad development (GO:0008585)	102	1	0.4	+	2.51	0.33	1
morphogenesis of a branching structure (GO:0001763)	205	2	0.8	+	2.49	0.192	1
cell-cell signaling (GO:0007267)	821	8	3.21	+	2.49	0.0152	0.392
negative regulation of macromolecule metabolic process (GO:0010605)	2670	26	10.44	+	2.49	6.81e-06	0.00103
response to purine-containing compound (GO:0014074)	103	1	0.4	+	2.48	0.332	1
regulation of cysteine-type endopeptidase activity involved in apoptotic process (GO:0043281)	206	2	0.81	+	2.48	0.193	1
cardiac muscle cell differentiation (GO:0055007)	103	1	0.4	+	2.48	0.332	1
cellular transition metal ion homeostasis (GO:0046916)	103	1	0.4	+	2.48	0.332	1
response to monosaccharide (GO:0034284)	103	1	0.4	+	2.48	0.332	1
negative regulation of cellular metabolic process (GO:0031324)	2485	24	9.72	+	2.47	2e-05	0.00242
embryo development ending in birth or egg hatching (GO:0009792)	831	8	3.25	+	2.46	0.0162	0.385
renal system development (GO:0072001)	312	3	1.22	+	2.46	0.124	1
regulation of myeloid cell differentiation (GO:0045637)	208	2	0.81	+	2.46	0.196	1
liver development (GO:0001889)	104	1	0.41	+	2.46	0.335	1
feeding behavior (GO:0007631)	104	1	0.41	+	2.46	0.335	1
embryonic morphogenesis (GO:0048598)	625	6	2.44	+	2.45	0.0361	0.613
positive regulation of nucleobase-containing compound metabolic process (GO:0045935)	1774	17	6.94	+	2.45	0.000463	0.0304
actin cytoskeleton organization (GO:0030036)	523	5	2.05	+	2.44	0.0546	0.781
export from cell (GO:0140352)	419	4	1.64	+	2.44	0.0824	1
striated muscle contraction (GO:0006941)	105	1	0.41	+	2.43	0.337	1
negative regulation of leukocyte differentiation (GO:1902106)	105	1	0.41	+	2.43	0.337	1
peptidyl-serine modification (GO:0018209)	210	2	0.82	+	2.43	0.199	1
lung development (GO:0030324)	210	2	0.82	+	2.43	0.199	1
cellular response to oxidative stress (GO:0034599)	210	2	0.82	+	2.43	0.199	1
regulation of intracellular signal transduction (GO:1902531)	1577	15	6.17	+	2.43	0.00113	0.0595
tube morphogenesis (GO:0035239)	737	7	2.88	+	2.43	0.0256	0.515
positive regulation of epithelial cell proliferation (GO:0050679)	211	2	0.83	+	2.42	0.2	1
regulation of cell population proliferation (GO:0042127)	1691	16	6.61	+	2.42	0.0008	0.047
nuclear export (GO:0051168)	106	1	0.41	+	2.41	0.34	1
mRNA transport (GO:0051028)	106	1	0.41	+	2.41	0.34	1
regulation of fibroblast proliferation (GO:0048145)	106	1	0.41	+	2.41	0.34	1
adult locomotory behavior (GO:0008344)	106	1	0.41	+	2.41	0.34	1
regulation of protein serine/threonine kinase activity (GO:0071900)	425	4	1.66	+	2.41	0.0857	1
positive regulation of molecular function (GO:0044093)	1490	14	5.83	+	2.40	0.00188	0.0878
respiratory tube development (GO:0030323)	213	2	0.83	+	2.40	0.203	1
negative regulation of hemopoiesis (GO:1903707)	107	1	0.42	+	2.39	0.343	1
hepaticobiliary system development (GO:0061008)	107	1	0.42	+	2.39	0.343	1
regulation of phosphate metabolic process (GO:0019220)	1502	14	5.87	+	2.38	0.00203	0.0934
positive regulation of signal transduction (GO:0009967)	1503	14	5.88	+	2.38	0.00204	0.0937
regulation of phosphorus metabolic process (GO:0051174)	1503	14	5.88	+	2.38	0.00204	0.0935
positive regulation of cellular metabolic process (GO:0031325)	3114	29	12.18	+	2.38	3.91e-06	0.000661
anatomical structure development (GO:0048856)	5166	48	20.21	+	2.38	1.19e-10	1.87e-07
regulation of cell-cell adhesion (GO:0022407)	431	4	1.69	+	2.37	0.0891	1
small GTPase mediated signal transduction (GO:0007264)	216	2	0.84	+	2.37	0.207	1
cellular monovalent inorganic cation homeostasis (GO:0030004)	108	1	0.42	+	2.37	0.345	1
response to oxygen levels (GO:0070482)	217	2	0.85	+	2.36	0.209	1
embryo development (GO:0009790)	1196	11	4.68	+	2.35	0.00694	0.24
regulation of hormone levels (GO:0010817)	545	5	2.13	+	2.35	0.0629	0.847
protein complex oligomerization (GO:0051259)	218	2	0.85	+	2.35	0.21	1
regulation of potassium ion transport (GO:0043266)	109	1	0.43	+	2.35	0.348	1
hair cycle (GO:0042633)	109	1	0.43	+	2.35	0.348	1
molting cycle (GO:0042303)	109	1	0.43	+	2.35	0.348	1
carboxylic acid transport (GO:0046942)	219	2	0.86	+	2.33	0.211	1
positive regulation of macromolecule metabolic process (GO:0010604)	3290	30	12.87	+	2.33	3.79e-06	0.000657
regulation of secretion by cell (GO:1903530)	659	6	2.58	+	2.33	0.0448	0.701
mesoderm development (GO:0007498)	110	1	0.43	+	2.32	0.35	1
regulation of mononuclear cell migration (GO:0071675)	110	1	0.43	+	2.32	0.35	1
regulation of transcription, DNA-templated (GO:0006355)	3190	29	12.48	+	2.32	6.32e-06	0.00101
organophosphate ester transport (GO:0015748)	110	1	0.43	+	2.32	0.35	1
regulation of nucleic acid-templated transcription (GO:1903506)	3194	29	12.49	+	2.32	6.48e-06	0.00101
regulation of RNA biosynthetic process (GO:2001141)	3197	29	12.5	+	2.32	6.6e-06	0.00101
positive regulation of cell adhesion (GO:0045785)	441	4	1.72	+	2.32	0.095	1
regulation of protein-containing complex assembly (GO:0043254)	441	4	1.72	+	2.32	0.095	1
gonad development (GO:0008406)	221	2	0.86	+	2.31	0.214	1
positive regulation of catalytic activity (GO:0043085)	1106	10	4.33	+	2.31	0.0112	0.329
cellular response to endogenous stimulus (GO:0071495)	885	8	3.46	+	2.31	0.0226	0.48
response to toxic substance (GO:0009636)	111	1	0.43	+	2.30	0.353	1
regulation of protein binding (GO:0043393)	222	2	0.87	+	2.30	0.216	1
associative learning (GO:0008306)	111	1	0.43	+	2.30	0.353	1
regulation of cell death (GO:0010941)	1667	15	6.52	+	2.30	0.00196	0.0905
regulation of macromolecule biosynthetic process (GO:0010556)	3668	33	14.35	+	2.30	1.28e-06	0.000287
positive regulation of nitrogen compound metabolic process (GO:0051173)	2899	26	11.34	+	2.29	2.95e-05	0.00332
cell surface receptor signaling pathway (GO:0007166)	1903	17	7.44	+	2.28	0.00102	0.0561
regulation of cytokine-mediated signaling pathway (GO:0001959)	112	1	0.44	+	2.28	0.355	1
neural tube closure (GO:0001843)	112	1	0.44	+	2.28	0.355	1
positive regulation of cell death (GO:0010942)	672	6	2.63	+	2.28	0.0484	0.732
positive regulation of metabolic process (GO:0009893)	3597	32	14.07	+	2.27	2.6e-06	0.000505
regulation of biological quality (GO:0065008)	3935	35	15.39	+	2.27	6.53e-07	0.000166
negative regulation of metabolic process (GO:0009892)	2926	26	11.44	+	2.27	3.46e-05	0.00381
tube closure (GO:0060606)	113	1	0.44	+	2.26	0.358	1
hemopoiesis (GO:0030097)	680	6	2.66	+	2.26	0.0507	0.743
positive regulation of cellular process (GO:0048522)	5672	50	22.18	+	2.25	2.31e-10	2.6e-07
regulation of cellular macromolecule biosynthetic process (GO:2000112)	3633	32	14.21	+	2.25	3.23e-06	0.000606
positive regulation of lymphocyte differentiation (GO:0045621)	114	1	0.45	+	2.24	0.36	1
regulation of G1/S transition of mitotic cell cycle (GO:2000045)	114	1	0.45	+	2.24	0.36	1
regulation of transforming growth factor beta receptor signaling pathway (GO:0017015)	114	1	0.45	+	2.24	0.36	1
regulation of synaptic plasticity (GO:0048167)	228	2	0.89	+	2.24	0.224	1
carboxylic acid transmembrane transport (GO:1905039)	114	1	0.45	+	2.24	0.36	1
myelination (GO:0042552)	114	1	0.45	+	2.24	0.36	1
carboxylic acid biosynthetic process (GO:0046394)	228	2	0.89	+	2.24	0.224	1
developmental process involved in reproduction (GO:0003006)	1027	9	4.02	+	2.24	0.0191	0.44
negative regulation of cellular process (GO:0048523)	4817	42	18.84	+	2.23	3.43e-08	1.39e-05
positive regulation of transmembrane receptor protein serine/threonine kinase signaling pathway (GO:0090100)	115	1	0.45	+	2.22	0.363	1
organic acid transmembrane transport (GO:1903825)	115	1	0.45	+	2.22	0.363	1
cellular response to reactive oxygen species (GO:0034614)	115	1	0.45	+	2.22	0.363	1
regulation of biosynthetic process (GO:0009889)	3911	34	15.3	+	2.22	1.79e-06	0.00038
positive regulation of gene expression (GO:0010628)	1151	10	4.5	+	2.22	0.0144	0.375
regulation of cysteine-type endopeptidase activity (GO:2000116)	231	2	0.9	+	2.21	0.229	1
developmental process (GO:0032502)	5554	48	21.72	+	2.21	1.63e-09	1.07e-06
positive regulation of protein modification process (GO:0031401)	1042	9	4.08	+	2.21	0.0207	0.447
cellular amino acid metabolic process (GO:0006520)	232	2	0.91	+	2.20	0.23	1
positive regulation of protein polymerization (GO:0032273)	116	1	0.45	+	2.20	0.365	1
regulation of cellular biosynthetic process (GO:0031326)	3833	33	14.99	+	2.20	3.46e-06	0.000626
regulation of small molecule metabolic process (GO:0062012)	349	3	1.37	+	2.20	0.157	1
negative regulation of protein phosphorylation (GO:0001933)	350	3	1.37	+	2.19	0.158	1
ensheathment of neurons (GO:0007272)	117	1	0.46	+	2.19	0.368	1
positive regulation of stress-activated MAPK cascade (GO:0032874)	117	1	0.46	+	2.19	0.368	1
response to carbohydrate (GO:0009743)	117	1	0.46	+	2.19	0.368	1
regulation of cellular response to transforming growth factor beta stimulus (GO:1903844)	117	1	0.46	+	2.19	0.368	1
organic acid biosynthetic process (GO:0016053)	234	2	0.92	+	2.19	0.233	1
axon ensheathment (GO:0008366)	117	1	0.46	+	2.19	0.368	1
positive regulation of apoptotic process (GO:0043065)	586	5	2.29	+	2.18	0.0801	0.979
negative regulation of cell population proliferation (GO:0008285)	705	6	2.76	+	2.18	0.0584	0.812
activation of protein kinase activity (GO:0032147)	235	2	0.92	+	2.18	0.234	1
negative regulation of cell death (GO:0060548)	1061	9	4.15	+	2.17	0.023	0.486
microtubule cytoskeleton organization involved in mitosis (GO:1902850)	118	1	0.46	+	2.17	0.37	1
positive regulation of biological process (GO:0048518)	6165	52	24.11	+	2.16	3.59e-10	3.32e-07
myeloid leukocyte differentiation (GO:0002573)	119	1	0.47	+	2.15	0.373	1
positive regulation of stress-activated protein kinase signaling cascade (GO:0070304)	119	1	0.47	+	2.15	0.373	1
regulation of cell communication (GO:0010646)	3214	27	12.57	+	2.15	6.24e-05	0.00614
cellular response to chemical stimulus (GO:0070887)	2384	20	9.32	+	2.14	0.000751	0.0446
regulation of RNA metabolic process (GO:0051252)	3458	29	13.53	+	2.14	3.03e-05	0.00338
regulation of signaling (GO:0023051)	3226	27	12.62	+	2.14	6.66e-05	0.00648
regulation of peptide transport (GO:0090087)	598	5	2.34	+	2.14	0.0856	1
regulation of protein modification process (GO:0031399)	1556	13	6.09	+	2.14	0.00738	0.248
organic acid transport (GO:0015849)	240	2	0.94	+	2.13	0.242	1
positive regulation of mitotic cell cycle (GO:0045931)	120	1	0.47	+	2.13	0.375	1
positive regulation of cell cycle (GO:0045787)	361	3	1.41	+	2.12	0.168	1
positive regulation of programmed cell death (GO:0043068)	602	5	2.35	+	2.12	0.0875	1
respiratory system development (GO:0060541)	241	2	0.94	+	2.12	0.243	1
negative regulation of signal transduction (GO:0009968)	1207	10	4.72	+	2.12	0.0195	0.425
cellular protein localization (GO:0034613)	1449	12	5.67	+	2.12	0.0107	0.32
regulation of DNA binding (GO:0051101)	121	1	0.47	+	2.11	0.378	1
regulation of nucleocytoplasmic transport (GO:0046822)	121	1	0.47	+	2.11	0.378	1
regulation of leukocyte chemotaxis (GO:0002688)	121	1	0.47	+	2.11	0.378	1
cellular response to organic substance (GO:0071310)	1816	15	7.1	+	2.11	0.00441	0.166
regulation of cell cycle (GO:0051726)	969	8	3.79	+	2.11	0.036	0.612
cellular macromolecule localization (GO:0070727)	1457	12	5.7	+	2.11	0.0112	0.33
regulation of signal transduction (GO:0009966)	2805	23	10.97	+	2.10	0.000376	0.0258
skeletal system development (GO:0001501)	488	4	1.91	+	2.10	0.125	1
regulated exocytosis (GO:0045055)	122	1	0.48	+	2.10	0.38	1
response to ketone (GO:1901654)	122	1	0.48	+	2.10	0.38	1
regulation of response to cytokine stimulus (GO:0060759)	122	1	0.48	+	2.10	0.38	1
regulation of cellular localization (GO:0060341)	856	7	3.35	+	2.09	0.0506	0.742
negative regulation of biological process (GO:0048519)	5264	43	20.59	+	2.09	1.48e-07	4.4e-05
regulation of secretion (GO:0051046)	736	6	2.88	+	2.08	0.0688	0.888
negative regulation of response to stimulus (GO:0048585)	1597	13	6.25	+	2.08	0.00909	0.281
cellular response to tumor necrosis factor (GO:0071356)	123	1	0.48	+	2.08	0.383	1
negative regulation of transmembrane receptor protein serine/threonine kinase signaling pathway (GO:0090101)	123	1	0.48	+	2.08	0.383	1
hematopoietic or lymphoid organ development (GO:0048534)	738	6	2.89	+	2.08	0.0695	0.894
positive regulation of protein metabolic process (GO:0051247)	1476	12	5.77	+	2.08	0.0123	0.334
cellular response to chemical stress (GO:0062197)	246	2	0.96	+	2.08	0.25	1
regulation of neurotransmitter secretion (GO:0046928)	123	1	0.48	+	2.08	0.383	1
regulation of blood circulation (GO:1903522)	246	2	0.96	+	2.08	0.25	1
locomotory behavior (GO:0007626)	246	2	0.96	+	2.08	0.25	1
regulation of cation transmembrane transport (GO:1904062)	370	3	1.45	+	2.07	0.177	1
regulation of nucleobase-containing compound metabolic process (GO:0019219)	3704	30	14.49	+	2.07	4.06e-05	0.00435
regulation of transmembrane receptor protein serine/threonine kinase signaling pathway (GO:0090092)	248	2	0.97	+	2.06	0.253	1
negative regulation of T cell activation (GO:0050868)	124	1	0.48	+	2.06	0.385	1
response to chemical (GO:0042221)	3472	28	13.58	+	2.06	8.96e-05	0.00835
negative regulation of protein catabolic process (GO:0042177)	124	1	0.48	+	2.06	0.385	1
secretion by cell (GO:0032940)	373	3	1.46	+	2.06	0.18	1
plasma membrane bounded cell projection assembly (GO:0120031)	373	3	1.46	+	2.06	0.18	1
supramolecular fiber organization (GO:0097435)	499	4	1.95	+	2.05	0.132	1
hexose metabolic process (GO:0019318)	125	1	0.49	+	2.05	0.388	1
chromatin assembly or disassembly (GO:0006333)	125	1	0.49	+	2.05	0.388	1
regulation of epithelial cell proliferation (GO:0050678)	375	3	1.47	+	2.05	0.182	1
negative regulation of DNA metabolic process (GO:0051053)	125	1	0.49	+	2.05	0.388	1
wound healing (GO:0042060)	250	2	0.98	+	2.05	0.256	1
positive regulation of endocytosis (GO:0045807)	125	1	0.49	+	2.05	0.388	1
regulation of programmed cell death (GO:0043067)	1504	12	5.88	+	2.04	0.0141	0.372
response to ionizing radiation (GO:0010212)	126	1	0.49	+	2.03	0.39	1
cellular respiration (GO:0045333)	126	1	0.49	+	2.03	0.39	1
B cell differentiation (GO:0030183)	126	1	0.49	+	2.03	0.39	1
regulation of hemopoiesis (GO:1903706)	379	3	1.48	+	2.02	0.186	1
positive regulation of cellular protein metabolic process (GO:0032270)	1394	11	5.45	+	2.02	0.02	0.433
inorganic anion transport (GO:0015698)	127	1	0.5	+	2.01	0.392	1
epithelial cell differentiation (GO:0030855)	510	4	1.99	+	2.01	0.14	1
adenylate cyclase-activating G protein-coupled receptor signaling pathway (GO:0007189)	128	1	0.5	+	2.00	0.395	1
transition metal ion homeostasis (GO:0055076)	128	1	0.5	+	2.00	0.395	1
microtubule cytoskeleton organization (GO:0000226)	513	4	2.01	+	1.99	0.142	1
immune system development (GO:0002520)	773	6	3.02	+	1.98	0.0827	0.996
regulation of localization (GO:0032879)	2837	22	11.1	+	1.98	0.00111	0.0591
regulation of animal organ morphogenesis (GO:2000027)	129	1	0.5	+	1.98	0.397	1
positive regulation of cell cycle process (GO:0090068)	258	2	1.01	+	1.98	0.268	1
negative regulation of translation (GO:0017148)	129	1	0.5	+	1.98	0.397	1
establishment of cell polarity (GO:0030010)	129	1	0.5	+	1.98	0.397	1
actin filament organization (GO:0007015)	259	2	1.01	+	1.97	0.269	1
cell projection assembly (GO:0030031)	389	3	1.52	+	1.97	0.195	1
leukocyte differentiation (GO:0002521)	390	3	1.53	+	1.97	0.196	1
protein-DNA complex assembly (GO:0065004)	130	1	0.51	+	1.97	0.399	1
hematopoietic progenitor cell differentiation (GO:0002244)	130	1	0.51	+	1.97	0.399	1
epidermis development (GO:0008544)	260	2	1.02	+	1.97	0.27	1
negative regulation of gene expression (GO:0010629)	913	7	3.57	+	1.96	0.0667	0.884
regulation of peptidyl-tyrosine phosphorylation (GO:0050730)	261	2	1.02	+	1.96	0.272	1
regulation of cellular metabolic process (GO:0031323)	5743	44	22.46	+	1.96	6.4e-07	0.000165
regulation of nitrogen compound metabolic process (GO:0051171)	5358	41	20.96	+	1.96	2.3e-06	0.000459
regulation of binding (GO:0051098)	393	3	1.54	+	1.95	0.199	1
leukocyte chemotaxis (GO:0030595)	131	1	0.51	+	1.95	0.402	1
regulation of protein localization (GO:0032880)	920	7	3.6	+	1.95	0.0689	0.888
negative regulation of apoptotic process (GO:0043066)	921	7	3.6	+	1.94	0.0692	0.892
regulation of primary metabolic process (GO:0080090)	5538	42	21.66	+	1.94	1.97e-06	0.000408
positive regulation of autophagy (GO:0010508)	132	1	0.52	+	1.94	0.404	1
regulation of ion transmembrane transporter activity (GO:0032412)	265	2	1.04	+	1.93	0.278	1
negative regulation of cell communication (GO:0010648)	1328	10	5.19	+	1.93	0.0345	0.609
positive regulation of inflammatory response (GO:0050729)	133	1	0.52	+	1.92	0.407	1
positive regulation of cell-cell adhesion (GO:0022409)	266	2	1.04	+	1.92	0.279	1
regulation of cell cycle G1/S phase transition (GO:1902806)	133	1	0.52	+	1.92	0.407	1
negative regulation of signaling (GO:0023057)	1332	10	5.21	+	1.92	0.0351	0.6
regulation of apoptotic process (GO:0042981)	1468	11	5.74	+	1.92	0.0279	0.534
negative regulation of cell cycle (GO:0045786)	402	3	1.57	+	1.91	0.208	1
monocarboxylic acid transport (GO:0015718)	134	1	0.52	+	1.91	0.409	1
regulation of protein kinase activity (GO:0045859)	670	5	2.62	+	1.91	0.122	1
positive regulation of response to external stimulus (GO:0032103)	403	3	1.58	+	1.90	0.209	1
negative regulation of phosphorylation (GO:0042326)	403	3	1.58	+	1.90	0.209	1
negative regulation of programmed cell death (GO:0043069)	942	7	3.68	+	1.90	0.076	0.948
circadian rhythm (GO:0007623)	135	1	0.53	+	1.89	0.411	1
cell cycle process (GO:0022402)	814	6	3.18	+	1.88	0.0997	1
[truncated: 13,746 more rows]

## Sheet: HighScore B cell DE genes
gene	p_val	avg_logFC	dorsal.pct	ventral.pct	p_val_adj
Crym	1.7e-84	-2.39538	0.03	0.861	4.4e-80
Adgrl3	2.75e-82	-1.36839	0.13	0.941	7.09e-78
Nrg1	5.5e-69	1.93118	0.991	0.624	1.42e-64
Pla2g7	5.71e-64	1.60671	0.943	0.381	1.47e-59
Dcc	1.93e-57	1.58066	0.846	0.178	4.99e-53
Gm29260	2.19e-56	1.45173	0.777	0.045	5.65e-52
Slit2	2.31e-53	-1.37343	0.096	0.713	5.97e-49
Pax6	4.63e-52	1.17621	0.855	0.302	1.19e-47
Ptprn2	5.78e-49	-1.05766	0.057	0.639	1.49e-44
Klf2	6.57e-45	-1.49703	0.289	0.856	1.7e-40
Ntrk2	9.24e-44	0.645578	1	1	2.38e-39
Rlbp1	1.13e-43	0.97798	0.684	0.059	2.92e-39
Riiad1	2.22e-43	-0.93751	0.172	0.738	5.72e-39
Cebpd	8.63e-42	-1.47688	0.373	0.886	2.23e-37
Dpyd	1.4e-39	-1.00273	0.13	0.653	3.61e-35
Lxn	1.84e-39	-0.8429	0.346	0.881	4.76e-35
Ncam2	4.23e-36	-1.0861	0.265	0.772	1.09e-31
Gpc5	1.43e-35	1.3584	0.834	0.436	3.69e-31
Spon1	3.14e-34	-0.56993	0.117	0.634	8.11e-30
Itm2c	7.1e-34	-0.68912	0.934	0.99	1.83e-29
S100a6	2.13e-33	-0.88422	0.886	0.98	5.5e-29
Epha5	6.5e-32	0.918552	0.771	0.322	1.68e-27
Notum	1.09e-31	-0.63555	0.063	0.5	2.82e-27
Frmd4a	5.1e-31	-0.79972	0.696	0.941	1.32e-26
Serpine2	9.58e-31	-0.77001	0.494	0.891	2.47e-26
Nkx6-2	7.43e-29	-0.65226	0.027	0.396	1.92e-24
Ramp1	1.13e-28	-0.78412	0.322	0.787	2.93e-24
Thrsp	3e-28	0.898175	0.762	0.356	7.73e-24
Fas	8.96e-27	-1.20573	0.114	0.525	2.31e-22
Mlf1	1.07e-26	-0.72534	0.292	0.738	2.75e-22
Egr2	1.81e-25	-0.82689	0.262	0.688	4.66e-21
S100a4	2.04e-25	-0.82704	0.226	0.644	5.26e-21
Rbms1	2.51e-25	-0.56492	0.06	0.421	6.47e-21
Slc1a3	3.99e-25	-0.55192	0.997	1	1.03e-20
Tmem47	1.04e-24	-0.58583	0.895	0.995	2.67e-20
Basp1	2.01e-24	-0.76346	0.401	0.718	5.19e-20
Meg3	6.54e-24	-0.84228	0.572	0.911	1.69e-19
Six3	7.31e-24	-0.46128	0.175	0.594	1.89e-19
Tmem176b	1.25e-23	-0.59451	0.202	0.604	3.22e-19
Sntb1	1.35e-23	-0.63595	0.105	0.47	3.48e-19
Tppp3	8.27e-23	-0.56189	0.328	0.733	2.13e-18
Lmo1	3.07e-22	-0.39694	0.027	0.332	7.93e-18
Pbx1	5.4e-22	-0.58195	0.943	0.99	1.39e-17
Fabp7	7.29e-22	-0.64485	0.861	0.97	1.88e-17
Dio2	2.47e-21	0.816725	0.536	0.144	6.36e-17
Emp1	3.31e-21	-0.62829	0.036	0.337	8.54e-17
Garnl3	5.71e-21	0.631176	0.666	0.287	1.47e-16
Slc15a2	6.74e-21	0.608544	0.991	0.936	1.74e-16
Urah	8.94e-21	1.25007	0.563	0.183	2.31e-16
Nfatc2	1.27e-20	-0.76403	0.202	0.569	3.29e-16
Slc38a1	3.77e-20	-0.76246	0.373	0.723	9.73e-16
Fam183b	3.83e-20	-0.42058	0.048	0.347	9.88e-16
Enkur	1.49e-19	-0.5773	0.377	0.748	3.85e-15
Pltp	3.02e-19	-0.43321	0.223	0.609	7.79e-15
Gpm6b	3.48e-19	-0.31737	1	1	8.97e-15
Ppp1r3g	6.7e-19	0.545085	0.461	0.094	1.73e-14
Capsl	6.85e-19	-0.40603	0.051	0.342	1.77e-14
Ptprz1	8.33e-19	0.498529	0.985	0.96	2.15e-14
C1ql3	1.48e-18	-0.46432	0.157	0.505	3.82e-14
Foxj1	3.65e-18	-0.54481	0.184	0.53	9.41e-14
Robo1	4.93e-18	-0.33336	0.042	0.322	1.27e-13
Phyhipl	4.96e-18	-0.53972	0.53	0.847	1.28e-13
Sparcl1	5.74e-18	0.61544	0.693	0.292	1.48e-13
RP24-314J18.1	6.76e-18	-0.4994	0.114	0.431	1.74e-13
Cnp	7.16e-18	-0.5185	0.307	0.658	1.85e-13
Selenop	8.77e-18	-0.44583	0.413	0.787	2.26e-13
Cfap43	1.06e-17	-0.38998	0.075	0.371	2.73e-13
Kcnip4	1.6e-17	0.977948	0.485	0.139	4.14e-13
Stat3	1.8e-17	-0.55418	0.663	0.886	4.65e-13
Dcun1d4	2.7e-17	0.937447	0.566	0.213	6.97e-13
Itih5	3.53e-17	-0.36334	0.066	0.347	9.12e-13
Klf4	4.97e-17	-0.58582	0.678	0.926	1.28e-12
Fth1	5.31e-17	-0.31991	1	1	1.37e-12
Stk33	1.29e-16	-0.26048	0.015	0.238	3.32e-12
Actb	1.48e-16	-0.38748	1	1	3.81e-12
Tnc	1.54e-16	0.582739	0.581	0.223	3.97e-12
Nkain2	1.87e-16	0.622173	0.967	0.881	4.83e-12
Pros1	2.21e-16	-0.49958	0.078	0.356	5.69e-12
Egln3	2.26e-16	0.425796	0.395	0.069	5.83e-12
Ppp1r1a	2.98e-16	0.444029	0.633	0.292	7.68e-12
Hmgcs2	3.17e-16	-0.49294	0.608	0.847	8.17e-12
Slc4a4	3.53e-16	-0.67122	0.524	0.847	9.1e-12
Lrp4	3.58e-16	0.531802	0.654	0.327	9.24e-12
Sgip1	3.95e-16	0.579678	0.828	0.619	1.02e-11
Mns1	5.39e-16	-0.39125	0.193	0.525	1.39e-11
Ccdc170	5.69e-16	-0.38042	0.108	0.396	1.47e-11
Serpinb1a	5.87e-16	-0.42384	0.057	0.312	1.51e-11
Gm26512	6.41e-16	0.569625	0.422	0.099	1.65e-11
Irs2	8.76e-16	-0.44696	0.274	0.614	2.26e-11
Cfap126	9.03e-16	-0.37908	0.084	0.366	2.33e-11
9330159F19Rik	1.06e-15	-0.61532	0.428	0.757	2.75e-11
Clu	1.32e-15	0.44829	0.994	0.975	3.4e-11
Dnah6	1.88e-15	-0.31966	0.051	0.297	4.86e-11
Atf3	1.94e-15	-0.89941	0.398	0.683	5e-11
Slc7a11	2.33e-15	-0.66743	0.419	0.713	6.02e-11
Necab2	2.37e-15	-0.40378	0.057	0.307	6.13e-11
Dlgap1	4.09e-15	0.462849	0.979	0.931	1.05e-10
Efhb	6.21e-15	-0.4352	0.187	0.485	1.6e-10
Kctd1	7.37e-15	0.43932	0.313	0.035	1.9e-10
Pls1	7.53e-15	0.423053	0.377	0.074	1.94e-10
Cables1	8.08e-15	-0.37941	0.133	0.421	2.08e-10
Hsp90aa1	9.49e-15	-0.43173	0.937	0.97	2.45e-10
Efhd1	1.62e-14	0.308758	0.313	0.035	4.19e-10
Htra1	1.75e-14	0.504107	0.84	0.668	4.52e-10
Adamts18	1.87e-14	-0.57433	0.211	0.505	4.81e-10
Gpr37l1	3.01e-14	-0.41203	0.602	0.901	7.77e-10
Dnaja4	4.6e-14	-0.38971	0.208	0.52	1.19e-09
Apbb2	6.17e-14	-0.31557	0.123	0.411	1.59e-09
Cpne8	6.98e-14	-0.34759	0.096	0.356	1.8e-09
Pmepa1	7.77e-14	0.433952	0.434	0.129	2e-09
Acot1	9.22e-14	-0.39091	0.864	0.96	2.38e-09
Dnajb1	9.82e-14	-0.63103	0.602	0.861	2.53e-09
Arc	1.01e-13	-0.43265	0.087	0.351	2.62e-09
Ldha	1.13e-13	-0.45693	0.416	0.723	2.91e-09
Klf6	1.14e-13	-0.46846	0.642	0.871	2.94e-09
Pifo	1.48e-13	-0.32344	0.069	0.307	3.82e-09
Ptprt	1.65e-13	-0.46204	0.608	0.871	4.25e-09
Ednrb	1.72e-13	0.457189	0.889	0.698	4.43e-09
Tmem176a	1.84e-13	-0.29556	0.054	0.277	4.75e-09
Prickle2	1.85e-13	-0.38209	0.139	0.421	4.79e-09
Kcnk10	2.05e-13	0.400312	0.446	0.144	5.29e-09
Ncam1	2.25e-13	-0.45095	0.569	0.782	5.81e-09
Cacnb2	2.49e-13	-0.40831	0.214	0.52	6.42e-09
Sorbs2	2.64e-13	-0.27781	0.06	0.297	6.8e-09
Pter	2.85e-13	-0.38	0.292	0.614	7.35e-09
Slc12a2	3.09e-13	-0.34908	0.202	0.505	7.97e-09
Arl13b	4.4e-13	-0.57327	0.337	0.614	1.14e-08
Gsx2	6.17e-13	0.539225	0.283	0.035	1.59e-08
C4b	6.67e-13	-0.44078	0.19	0.465	1.72e-08
Lhfp	6.77e-13	-0.41659	0.512	0.807	1.75e-08
Nbl1	6.87e-13	-0.31848	0.06	0.282	1.77e-08
Irf1	7.07e-13	-0.37607	0.238	0.54	1.82e-08
Gadd45b	7.44e-13	-0.47117	0.283	0.604	1.92e-08
Slc6a6	8.68e-13	-0.35308	0.199	0.505	2.24e-08
Meig1	8.77e-13	-0.29649	0.09	0.342	2.26e-08
Slc16a2	9.34e-13	0.445496	0.627	0.332	2.41e-08
Acsf2	1.01e-12	-0.3314	0.292	0.584	2.61e-08
Dclk1	1.06e-12	0.413602	0.982	0.906	2.74e-08
Rian	1.21e-12	-0.40809	0.123	0.386	3.12e-08
1190002N15Rik	1.49e-12	-0.29649	0.111	0.366	3.84e-08
Prss56	1.65e-12	-0.89134	0.105	0.351	4.27e-08
Zfp36	1.67e-12	-0.56548	0.512	0.792	4.3e-08
Id3	1.68e-12	-0.47306	0.642	0.906	4.34e-08
Efna5	1.73e-12	-0.34351	0.133	0.406	4.46e-08
Sik3	1.9e-12	-0.32765	0.952	0.995	4.89e-08
Cacna2d3	2.09e-12	-0.32278	0.072	0.297	5.39e-08
Grm3	2.09e-12	-0.41985	0.392	0.698	5.39e-08
4933434E20Rik	2.3e-12	-0.3756	0.503	0.807	5.94e-08
Ankrd6	2.69e-12	0.468801	0.623	0.361	6.94e-08
Ifi27	2.81e-12	-0.3413	0.232	0.53	7.24e-08
Dnah9	3.16e-12	-0.31398	0.045	0.248	8.14e-08
Trim2	3.53e-12	0.42274	0.831	0.693	9.1e-08
Ifitm3	4.49e-12	-0.56886	0.364	0.653	1.16e-07
Foxp1	4.63e-12	-0.34836	0.223	0.51	1.19e-07
Tox3	4.64e-12	0.437359	0.774	0.579	1.2e-07
Car8	6.03e-12	-0.42571	0.057	0.267	1.56e-07
Il6st	7.1e-12	-0.39722	0.325	0.589	1.83e-07
Mdga2	7.38e-12	0.640514	0.527	0.272	1.9e-07
Gsn	7.76e-12	0.497541	0.575	0.297	2e-07
Cdon	8.46e-12	0.394856	0.413	0.139	2.18e-07
Gm10561	8.81e-12	-0.52412	0.464	0.738	2.27e-07
Ano3	8.89e-12	-0.27153	0.027	0.203	2.29e-07
Ext1	9.45e-12	-0.37346	0.446	0.777	2.44e-07
Hdac4	1.14e-11	-0.35815	0.367	0.658	2.95e-07
Lmna	1.56e-11	-0.41363	0.343	0.644	4.03e-07
Sept3	1.88e-11	-0.42547	0.395	0.649	4.85e-07
Lama2	1.89e-11	0.435902	0.587	0.302	4.87e-07
Ccdc157	2.02e-11	-0.27034	0.099	0.327	5.21e-07
Nol4	2.06e-11	0.39219	0.669	0.421	5.3e-07
C530008M17Rik	2.35e-11	-0.297	0.148	0.411	6.05e-07
Psph	2.61e-11	0.326021	0.964	0.911	6.73e-07
Dcdc2a	2.71e-11	-0.27165	0.078	0.292	7e-07
Hopx	2.73e-11	0.367098	0.214	0.01	7.05e-07
Crot	2.98e-11	-0.36738	0.34	0.599	7.7e-07
Mapk10	4.51e-11	-0.42826	0.349	0.629	1.16e-06
Zfp36l1	4.76e-11	-0.42539	0.91	0.99	1.23e-06
Arid5b	4.78e-11	-0.41349	0.271	0.554	1.23e-06
C130071C03Rik	5.75e-11	0.396117	0.886	0.812	1.48e-06
Aqp4	5.95e-11	-0.35411	0.19	0.46	1.53e-06
Sorbs1	6.23e-11	-0.44801	0.56	0.762	1.61e-06
Timp3	6.28e-11	-0.41401	0.672	0.881	1.62e-06
Lfng	7.4e-11	-0.37827	0.413	0.683	1.91e-06
Usp53	7.94e-11	-0.40472	0.367	0.634	2.05e-06
Eepd1	9.28e-11	0.321071	0.398	0.139	2.39e-06
Jak2	9.52e-11	-0.36656	0.229	0.48	2.46e-06
Cyp2d22	9.56e-11	-0.32407	0.298	0.545	2.47e-06
Eif1a	1.16e-10	-0.31653	0.31	0.579	3e-06
Cdk11b	1.51e-10	0.985562	0.762	0.624	3.9e-06
P4ha1	1.59e-10	-0.30164	0.271	0.54	4.1e-06
Itih3	1.84e-10	-0.37686	0.25	0.5	4.75e-06
Ddit3	1.86e-10	-0.4721	0.557	0.802	4.81e-06
Mgst1	1.94e-10	-0.35127	0.639	0.827	5e-06
Srf	1.98e-10	-0.30873	0.19	0.431	5.1e-06
Mir99ahg	1.99e-10	0.383816	1	0.995	5.13e-06
Cryab	2.03e-10	-0.25749	0.06	0.252	5.23e-06
Luzp2	2.09e-10	0.428101	0.919	0.817	5.4e-06
Dcun1d3	2.1e-10	-0.40558	0.202	0.446	5.42e-06
Tekt1	2.1e-10	-0.27565	0.111	0.337	5.43e-06
Itpr1	2.13e-10	-0.33586	0.142	0.371	5.5e-06
Lgr4	2.32e-10	-0.28365	0.157	0.396	5.97e-06
Gclc	2.32e-10	-0.45249	0.422	0.683	5.98e-06
Arx	2.58e-10	0.317693	0.395	0.134	6.67e-06
Rsph1	2.77e-10	-0.27893	0.114	0.337	7.15e-06
Sbno2	3.34e-10	-0.37041	0.066	0.257	8.63e-06
Epha4	3.77e-10	0.424429	0.488	0.248	9.73e-06
Wdfy2	3.81e-10	-0.25306	0.114	0.337	9.84e-06
Ntm	4.14e-10	-0.40421	0.747	0.916	1.07e-05
Pak3	4.47e-10	0.498317	0.395	0.158	1.15e-05
1110004E09Rik	6.14e-10	-0.2814	0.247	0.51	1.58e-05
Id1	7.64e-10	-0.42479	0.473	0.723	1.97e-05
Ssbp3	8.79e-10	0.380062	0.717	0.569	2.27e-05
Fosb	8.98e-10	-0.3186	0.858	0.965	2.32e-05
Shroom3	9.34e-10	0.383691	0.395	0.158	2.41e-05
Slc6a11	1.09e-09	-0.3236	0.358	0.609	2.8e-05
Arhgef4	1.22e-09	-0.37321	0.361	0.614	3.14e-05
Naf1	1.64e-09	-0.30618	0.229	0.465	4.23e-05
Tspan15	1.67e-09	-0.31023	0.361	0.609	4.3e-05
Zfp703	1.77e-09	-0.30226	0.283	0.55	4.56e-05
Kcnk1	1.82e-09	-0.34058	0.407	0.644	4.7e-05
Tuba1a	2.14e-09	-0.28184	0.997	0.995	5.53e-05
Fmo1	2.21e-09	-0.30771	0.316	0.554	5.71e-05
St8sia1	2.35e-09	0.325299	0.367	0.134	6.05e-05
Fhl1	2.44e-09	-0.29038	0.355	0.639	6.29e-05
Gm20713	2.48e-09	0.260108	0.277	0.064	6.39e-05
Plekhm3	2.98e-09	-0.29774	0.226	0.455	7.69e-05
Slc35f1	3.25e-09	0.42699	0.648	0.46	8.38e-05
Ddo	3.57e-09	-0.29403	0.265	0.515	9.2e-05
Abca1	3.61e-09	-0.33345	0.569	0.792	9.31e-05
Kif21a	4.55e-09	0.301271	0.922	0.926	0.000117
Ivns1abp	4.72e-09	-0.27318	0.214	0.47	0.000122
Cited2	4.99e-09	-0.36663	0.349	0.614	0.000129
Rsph9	5.34e-09	-0.25289	0.328	0.574	0.000138
Plekhb1	5.88e-09	-0.2694	0.404	0.678	0.000152
Gabrg3	6.54e-09	-0.37205	0.295	0.55	0.000169
Gng12	7.04e-09	-0.29789	0.464	0.718	0.000182
Snhg15	9.46e-09	0.527347	0.392	0.168	0.000244
Anxa2	1.04e-08	-0.34161	0.527	0.807	0.000267
Nrcam	1.09e-08	-0.3104	0.512	0.743	0.000282
Trpm3	1.11e-08	0.569793	0.726	0.584	0.000285
Igfbp5	1.19e-08	0.438651	0.952	0.936	0.000308
Sgcd	1.21e-08	-0.39304	0.22	0.441	0.000311
Pde4b	1.44e-08	-0.45628	0.617	0.827	0.000372
Gfap	1.45e-08	0.649914	0.708	0.52	0.000373
Stmn3	1.46e-08	-0.27077	0.268	0.54	0.000377
Pcf11	1.47e-08	-0.2661	0.262	0.5	0.00038
Mt2	1.67e-08	0.305794	0.976	0.965	0.000432
Nfkbiz	1.78e-08	-0.35204	0.274	0.515	0.000459
Rhob	1.81e-08	-0.2683	0.849	0.98	0.000467
Armc3	1.84e-08	-0.27308	0.117	0.312	0.000475
Col5a2	1.91e-08	-0.58142	0.226	0.421	0.000494
Ptn	2.12e-08	0.314172	1	0.95	0.000546
Prex2	2.37e-08	-0.34713	0.608	0.802	0.000612
Tox	2.42e-08	0.421541	0.786	0.678	0.000625
Nme5	2.62e-08	-0.27861	0.181	0.391	0.000676
Ptpn12	2.7e-08	-0.29767	0.334	0.584	0.000697
Zbtb11	2.94e-08	-0.26209	0.277	0.535	0.000759
Ccdc114	2.95e-08	-0.29497	0.244	0.465	0.000761
Taf4b	3.41e-08	-0.40963	0.136	0.327	0.000881
Nfib	3.59e-08	0.277466	0.976	0.97	0.000925
Pcdh9	3.71e-08	0.346793	0.979	0.97	0.000956
Mapt	4.01e-08	0.399911	0.837	0.762	0.001034
Flrt2	4.14e-08	0.277917	0.295	0.094	0.001069
Nat8f1	4.71e-08	-0.27229	0.334	0.559	0.001216
Neto2	4.89e-08	-0.26698	0.13	0.327	0.001262
Peli1	4.93e-08	-0.29207	0.367	0.624	0.001271
Uhrf2	5.11e-08	-0.25112	0.31	0.569	0.001318
Vcl	6.04e-08	-0.4256	0.666	0.847	0.001558
Pmm1	6.21e-08	0.282594	0.846	0.733	0.001604
Spag16	6.9e-08	-0.33705	0.123	0.312	0.00178
Grik2	7.18e-08	-0.31732	0.506	0.772	0.001853
Mxi1	7.79e-08	-0.30998	0.681	0.842	0.00201
Nf1	7.82e-08	-0.29194	0.524	0.772	0.002019
Sparc	8.53e-08	-0.35604	0.789	0.926	0.0022
Synpo2	8.72e-08	-0.37181	0.395	0.604	0.002251
Pcdh15	8.95e-08	0.652963	0.265	0.089	0.002308
Foxo1	9.34e-08	-0.34272	0.467	0.663	0.002409
Gls	9.54e-08	-0.27822	0.325	0.579	0.002462
Tsc22d2	1.21e-07	-0.37069	0.422	0.644	0.00311
Hdac9	1.22e-07	-0.3838	0.735	0.881	0.003139
Nop58	1.24e-07	-0.37678	0.494	0.743	0.003207
Aig1	1.34e-07	-0.26099	0.497	0.738	0.003465
Sertad1	1.35e-07	-0.26397	0.292	0.53	0.003482
Myo1e	1.66e-07	-0.36263	0.431	0.644	0.004292
Cadm2	1.97e-07	0.291336	0.988	0.99	0.005086
Txnip	1.97e-07	-0.45499	0.392	0.589	0.005094
Nav2	2.03e-07	0.325936	0.524	0.337	0.005241
Add3	2.36e-07	0.356153	0.759	0.693	0.006088
Dnajc15	2.36e-07	-0.25272	0.268	0.485	0.006098
Gm14964	2.78e-07	0.301963	0.858	0.787	0.007162
Cntnap2	2.81e-07	1.03638	0.422	0.252	0.00724
Las1l	2.88e-07	-0.28241	0.211	0.411	0.007422
Adcyap1r1	3.11e-07	-0.28981	0.355	0.564	0.008029
Sema6a	3.13e-07	-0.31324	0.458	0.678	0.008075
Adora2b	3.42e-07	0.277187	0.458	0.252	0.008834
Bmyc	3.54e-07	0.332156	0.72	0.554	0.009133
Gm973	3.61e-07	-0.26851	0.578	0.797	0.009321
Rarres2	3.87e-07	-0.29017	0.386	0.604	0.009995
Nhsl1	4.08e-07	-0.27786	0.172	0.366	0.010537
6330403K07Rik	4.15e-07	0.445846	0.958	0.995	0.010711
Adam23	4.69e-07	0.287714	0.322	0.134	0.01209
Chil1	4.87e-07	0.275061	0.383	0.188	0.012573
Rbp1	5.33e-07	0.40508	0.533	0.371	0.013745
Wscd1	5.47e-07	0.293836	0.515	0.322	0.014118
Tnfaip6	5.7e-07	0.377099	0.217	0.054	0.014716
Selenom	6.09e-07	-0.25279	0.708	0.866	0.015721
Vps37b	6.3e-07	0.743561	0.69	0.619	0.016264
Cacna2d1	6.48e-07	0.347964	0.452	0.267	0.016709
Hsph1	7.69e-07	-0.29139	0.322	0.54	0.019835
Nmt2	8.71e-07	-0.28116	0.446	0.668	0.022477
Sox9	9.36e-07	-0.279	0.937	0.975	0.024139
Fgf13	1.07e-06	0.365554	0.657	0.495	0.027557
Bmpr1b	1.11e-06	-0.43311	0.642	0.812	0.02867
Unc13c	1.15e-06	0.311964	0.19	0.045	0.029599
Brd2	1.26e-06	-0.25671	0.491	0.713	0.032483
St3gal4	1.31e-06	0.257733	0.494	0.297	0.033809
Dab1	1.34e-06	0.400309	0.825	0.738	0.034633
Mertk	1.4e-06	-0.25894	0.304	0.51	0.036048
Zeb1	1.6e-06	0.298162	0.84	0.772	0.041208
Sltm	1.65e-06	0.478919	0.937	0.931	0.042589
Rgs6	1.68e-06	0.32644	0.765	0.624	0.043466
Id4	1.69e-06	-0.25994	0.919	0.97	0.043538
Gabarapl1	1.72e-06	-0.26197	0.395	0.584	0.044427
Pacrg	1.77e-06	-0.27032	0.611	0.807	0.045671
Adk	1.77e-06	0.288971	0.855	0.748	0.045799
Rfx4	1.9e-06	-0.27372	0.732	0.886	0.04909
Chka	2.03e-06	-0.26059	0.377	0.594	0.052314
Palld	2.05e-06	-0.29039	0.416	0.609	0.052881
Hdac8	2.11e-06	-0.3354	0.672	0.837	0.054431
Gm26668	2.21e-06	0.288593	0.295	0.119	0.057007
Efcab14	2.29e-06	0.306869	0.645	0.51	0.059102
Maff	3.57e-06	-0.29551	0.581	0.817	0.092032
Chic2	3.96e-06	0.27409	0.687	0.604	0.102161
H1f0	4.36e-06	0.30289	0.509	0.351	0.1124
Gpld1	4.42e-06	-0.26	0.217	0.376	0.114178
Hivep3	4.67e-06	0.312854	0.627	0.505	0.120393
Ptch1	4.74e-06	-0.25235	0.25	0.441	0.122274
Hlf	5.16e-06	-0.26542	0.325	0.495	0.133034
Serpinh1	6.53e-06	-0.28161	0.383	0.569	0.168574
Sat1	6.95e-06	-0.25081	0.889	0.97	0.179408
Homer1	7.53e-06	-0.26519	0.699	0.847	0.194398
Samd4	8.06e-06	-0.306	0.313	0.495	0.207853
Mgat5	8.38e-06	0.300776	0.726	0.619	0.216287
Pdgfc	8.5e-06	-0.26145	0.175	0.332	0.219308
Cyfip2	8.66e-06	0.404825	0.142	0.025	0.223483
Dstn	9.41e-06	-0.27072	0.491	0.653	0.242877
Immp2l	9.47e-06	-0.256	0.331	0.53	0.244294
Tpm3	9.58e-06	-0.2779	0.5	0.698	0.247233
Nrg3	1.06e-05	0.323745	0.181	0.05	0.272431
Zmiz1	1.15e-05	0.278138	0.636	0.51	0.295767
Ccdc80	1.19e-05	0.318739	0.672	0.569	0.306611
S100a13	1.35e-05	-0.25719	0.602	0.752	0.347727
A830082K12Rik	1.53e-05	0.306983	0.337	0.183	0.395788
Serpina3n	1.54e-05	-0.28673	0.139	0.287	0.39642
Socs3	1.61e-05	-0.32266	0.358	0.535	0.415573
Cbx4	1.67e-05	-0.26296	0.38	0.545	0.431389
Tubb2a	2.58e-05	-0.30844	0.916	0.985	0.666775
Dbp	2.61e-05	0.261698	0.551	0.391	0.672855
1810026B05Rik	2.8e-05	0.254504	0.672	0.564	0.722113
1700016P03Rik	2.97e-05	-0.30147	0.181	0.342	0.767076
Tbl3	3.02e-05	0.449803	0.527	0.401	0.780286
Adcy2	3.31e-05	0.252141	0.768	0.658	0.854165
Nr4a1	3.74e-05	-0.2649	0.503	0.688	0.96608
Agbl4	4.86e-05	-0.28472	0.419	0.604	1
Cspp1	6.3e-05	-0.25385	0.521	0.718	1
Gm17750	6.45e-05	0.282017	0.687	0.609	1
Etv6	6.46e-05	-0.31248	0.446	0.594	1
Ankrd28	7.39e-05	-0.26173	0.38	0.574	1
Ints6	8.32e-05	-0.26587	0.343	0.52	1
Gpatch8	8.87e-05	0.269039	0.66	0.599	1
Slc25a3	8.95e-05	0.323523	0.985	0.98	1
Hist1h2bc	9.28e-05	-0.26073	0.72	0.837	1
Thbs4	0.000103	0.407067	0.614	0.475	1
Zfp608	0.000114	-0.28528	0.593	0.752	1
Erbb4	0.000132	-0.27914	0.136	0.272	1
Wdr17	0.000157	0.270222	0.684	0.599	1
Hspa1a	0.000181	-0.38903	0.238	0.381	1
Isy1	0.000197	0.349823	0.256	0.134	1
Mpped2	0.000213	0.275803	0.377	0.248	1
2610203C20Rik	0.000228	0.252059	0.783	0.777	1
Zc3h13	0.00025	0.257888	0.452	0.327	1
Mcc	0.000277	0.26613	0.479	0.337	1
Rnd3	0.000308	0.271712	0.699	0.653	1
Impact	0.000314	0.253235	0.753	0.708	1
Man1b1	0.000456	0.309258	0.277	0.153	1
Dst	0.00049	-0.35867	0.542	0.718	1
Gm6225	0.000576	-0.29648	0.105	0.208	1
Prkd1	0.000791	0.253966	0.617	0.54	1
2021-03-01	0.001001	0.260953	0.184	0.084	1
Tanc2	0.001163	-0.34734	0.633	0.728	1
Arih1	0.001242	0.385685	0.858	0.856	1
Trmt61b	0.001459	0.460666	0.265	0.158	1
Fxyd6	0.002411	0.250825	0.425	0.332	1
Spag5	0.002776	0.353897	0.798	0.797	1
Tom1l2	0.004328	0.329978	0.527	0.446	1
Hes1	0.006137	0.313871	0.834	0.802	1
Agl	0.007556	0.472067	0.386	0.292	1
Fam13c	0.00908	0.272678	0.401	0.302	1
Hes5	0.012866	0.499135	0.711	0.698	1
Adamts1	0.016908	0.258028	0.346	0.262	1
Nnat	0.018523	-0.43778	0.783	0.743	1
Prm1	0.032169	-0.28213	0.383	0.47	1
Otud1	0.062874	0.25974	0.337	0.272	1
Gm28153	0.079697	0.305067	0.443	0.391	1
A2m	0.10559	-0.67309	0.105	0.149	1
Kcnu1	0.158294	0.300006	0.395	0.381	1
Emd	0.278217	0.399266	0.476	0.49	1
Gm26551	0.385752	0.290909	0.217	0.262	1
Sox2ot	0.448393	-0.34926	0.907	0.881	1
Uty	0.681719	0.250525	0.274	0.277	1
1600010M07Rik	0.824668	0.36346	0.139	0.149	1

## Sheet: HighScore Ventral B cells GO
go	ref	obs	expected	pos.neg	fold.enrich	raw.p.value	fdr
positive regulation of cell volume (GO:0045795)	1	1	0.01	+	83.92	0.0118	0.236
positive regulation of central tolerance induction (GO:0002648)	1	1	0.01	+	83.92	0.0118	0.236
regulation of central tolerance induction (GO:0002646)	1	1	0.01	+	83.92	0.0118	0.235
pyrimidine deoxyribonucleoside catabolic process (GO:0046127)	1	1	0.01	+	83.92	0.0118	0.235
positive regulation of growth factor dependent skeletal muscle satellite cell proliferation (GO:1902728)	2	2	0.02	+	83.92	0.000278	0.0153
positive regulation of skeletal muscle satellite cell proliferation (GO:1902724)	2	2	0.02	+	83.92	0.000278	0.0153
vitamin E biosynthetic process (GO:0010189)	1	1	0.01	+	83.92	0.0118	0.235
response to chlorate (GO:0010157)	1	1	0.01	+	83.92	0.0118	0.235
rhombomere 5 formation (GO:0021666)	1	1	0.01	+	83.92	0.0118	0.234
rhombomere 5 structural organization (GO:0021665)	1	1	0.01	+	83.92	0.0118	0.234
rhombomere 5 morphogenesis (GO:0021664)	1	1	0.01	+	83.92	0.0118	0.234
rhombomere 3 formation (GO:0021660)	1	1	0.01	+	83.92	0.0118	0.233
rhombomere 3 structural organization (GO:0021659)	1	1	0.01	+	83.92	0.0118	0.233
negative regulation of axon guidance (GO:1902668)	1	1	0.01	+	83.92	0.0118	0.233
programmed cell death induced by symbiont (GO:0034050)	1	1	0.01	+	83.92	0.0118	0.233
response to triglyceride (GO:0034014)	1	1	0.01	+	83.92	0.0118	0.232
rhombomere structural organization (GO:0021595)	1	1	0.01	+	83.92	0.0118	0.232
rhombomere formation (GO:0021594)	1	1	0.01	+	83.92	0.0118	0.232
negative regulation of death-inducing signaling complex assembly (GO:1903073)	1	1	0.01	+	83.92	0.0118	0.231
regulation of death-inducing signaling complex assembly (GO:1903072)	1	1	0.01	+	83.92	0.0118	0.231
vesicle-mediated intercellular transport (GO:0110077)	1	1	0.01	+	83.92	0.0118	0.231
beta-alanine transport (GO:0001762)	1	1	0.01	+	83.92	0.0118	0.231
metabolism by organism of protein in other organism involved in symbiotic interaction (GO:0052418)	1	1	0.01	+	83.92	0.0118	0.23
metabolism by host of symbiont protein (GO:0052417)	1	1	0.01	+	83.92	0.0118	0.23
GPI anchor release (GO:0006507)	1	1	0.01	+	83.92	0.0118	0.23
positive regulation of deadenylation-independent decapping of nuclear-transcribed mRNA (GO:1901835)	1	1	0.01	+	83.92	0.0118	0.229
regulation of deadenylation-independent decapping of nuclear-transcribed mRNA (GO:1901834)	1	1	0.01	+	83.92	0.0118	0.229
catabolism by organism of protein in other organism involved in symbiotic interaction (GO:0052363)	1	1	0.01	+	83.92	0.0118	0.229
catabolism by host of symbiont protein (GO:0052362)	1	1	0.01	+	83.92	0.0118	0.229
cellular response to lipid hydroperoxide (GO:0071449)	1	1	0.01	+	83.92	0.0118	0.228
cellular response to triglyceride (GO:0071401)	1	1	0.01	+	83.92	0.0118	0.228
protein depalmitoleylation (GO:1990697)	1	1	0.01	+	83.92	0.0118	0.228
histone H4-K16 deacetylation (GO:1990678)	1	1	0.01	+	83.92	0.0118	0.227
cellular response to interleukin-11 (GO:0071348)	1	1	0.01	+	83.92	0.0118	0.227
modulation of signal transduction in other organism (GO:0044501)	1	1	0.01	+	83.92	0.0118	0.227
cellular response to iron(II) ion (GO:0071282)	1	1	0.01	+	83.92	0.0118	0.227
thymidine catabolic process (GO:0006214)	1	1	0.01	+	83.92	0.0118	0.226
cellular response to tumor cell (GO:0071228)	1	1	0.01	+	83.92	0.0118	0.226
response to raffinose (GO:1901545)	1	1	0.01	+	83.92	0.0118	0.226
modulation by symbiont of host signal transduction pathway (GO:0052027)	1	1	0.01	+	83.92	0.0118	0.226
fermentation (GO:0006113)	1	1	0.01	+	83.92	0.0118	0.225
regulation of cysteine metabolic process (GO:1901494)	1	1	0.01	+	83.92	0.0118	0.225
intrinsic apoptotic signaling pathway in response to nitrosative stress (GO:1990442)	1	1	0.01	+	83.92	0.0118	0.225
mineralocorticoid receptor signaling pathway (GO:0031959)	1	1	0.01	+	83.92	0.0118	0.224
negative regulation of retinal ganglion cell axon guidance (GO:0090260)	1	1	0.01	+	83.92	0.0118	0.224
response to cytochalasin B (GO:1901328)	1	1	0.01	+	83.92	0.0118	0.224
negative regulation of cell adhesion involved in sprouting angiogenesis (GO:0106089)	1	1	0.01	+	83.92	0.0118	0.224
regulation of cell adhesion involved in sprouting angiogenesis (GO:0106088)	1	1	0.01	+	83.92	0.0118	0.223
induction of negative chemotaxis (GO:0050929)	1	1	0.01	+	83.92	0.0118	0.223
positive regulation of negative chemotaxis (GO:0050924)	1	1	0.01	+	83.92	0.0118	0.223
positive regulation of lung ciliated cell differentiation (GO:1901248)	1	1	0.01	+	83.92	0.0118	0.223
regulation of lung ciliated cell differentiation (GO:1901246)	1	1	0.01	+	83.92	0.0118	0.222
negative regulation of development of symbiont involved in interaction with host (GO:0044147)	1	1	0.01	+	83.92	0.0118	0.222
modulation of development of symbiont involved in interaction with host (GO:0044145)	1	1	0.01	+	83.92	0.0118	0.222
positive regulation of low-density lipoprotein particle receptor binding (GO:1905597)	1	1	0.01	+	83.92	0.0118	0.221
detection of cold stimulus involved in thermoception (GO:0120169)	1	1	0.01	+	83.92	0.0118	0.221
corticosterone secretion (GO:0035934)	1	1	0.01	+	83.92	0.0118	0.221
glucocorticoid secretion (GO:0035933)	1	1	0.01	+	83.92	0.0118	0.221
negative regulation of mitochondrial ATP synthesis coupled electron transport (GO:1905447)	1	1	0.01	+	83.92	0.0118	0.22
negative regulation of leukocyte adhesion to arterial endothelial cell (GO:1904998)	1	1	0.01	+	83.92	0.0118	0.22
lymphocyte adhesion to endothelial cell of high endothelial venule (GO:0036339)	1	1	0.01	+	83.92	0.0118	0.22
interleukin-27-mediated signaling pathway (GO:0070106)	1	1	0.01	+	83.92	0.0118	0.22
regulation of protein localization to adherens junction (GO:1904702)	1	1	0.01	+	83.92	0.0118	0.219
perichondral bone morphogenesis (GO:0061974)	1	1	0.01	+	83.92	0.0118	0.219
membrane bone morphogenesis (GO:0061973)	1	1	0.01	+	83.92	0.0118	0.219
histone H3-Y41 phosphorylation (GO:0035409)	1	1	0.01	+	83.92	0.0118	0.219
histone-tyrosine phosphorylation (GO:0035406)	1	1	0.01	+	83.92	0.0118	0.218
seminal vesicle morphogenesis (GO:0061682)	1	1	0.01	+	83.92	0.0118	0.218
sensory perception of cold stimulus (GO:0062035)	1	1	0.01	+	83.92	0.0118	0.218
negative regulation of polynucleotide adenylyltransferase activity (GO:1904246)	1	1	0.01	+	83.92	0.0118	0.218
cellular response to raffinose (GO:0097403)	1	1	0.01	+	83.92	0.0118	0.217
cell motility in response to calcium ion (GO:0097231)	1	1	0.01	+	83.92	0.0118	0.217
regulation of cell proliferation involved in tissue homeostasis (GO:0060784)	1	1	0.01	+	83.92	0.0118	0.217
cellular response to cytochalasin B (GO:0072749)	1	1	0.01	+	83.92	0.0118	0.217
epithelial cell proliferation involved in prostate gland development (GO:0060767)	1	1	0.01	+	83.92	0.0118	0.216
positive regulation of central B cell tolerance induction (GO:0002897)	1	1	0.01	+	83.92	0.0118	0.216
regulation of central B cell tolerance induction (GO:0002895)	1	1	0.01	+	83.92	0.0118	0.216
lung smooth muscle development (GO:0061145)	2	2	0.02	+	83.92	0.000278	0.0152
corticospinal neuron axon guidance through spinal cord (GO:0021972)	1	1	0.01	+	83.92	0.0118	0.216
glucose catabolic process to lactate via pyruvate (GO:0019661)	1	1	0.01	+	83.92	0.0118	0.215
glycolytic fermentation (GO:0019660)	1	1	0.01	+	83.92	0.0118	0.215
glucose catabolic process to lactate (GO:0019659)	1	1	0.01	+	83.92	0.0118	0.215
dense core granule biogenesis (GO:0061110)	1	1	0.01	+	83.92	0.0118	0.215
seminal vesicle epithelium development (GO:0061108)	1	1	0.01	+	83.92	0.0118	0.214
seminal vesicle development (GO:0061107)	2	2	0.02	+	83.92	0.000278	0.0152
negative regulation of mitochondrial electron transport, NADH to ubiquinone (GO:1902957)	1	1	0.01	+	83.92	0.0118	0.214
modulation by symbiont of host I-kappaB kinase/NF-kappaB cascade (GO:0085032)	1	1	0.01	+	83.92	0.0118	0.214
chemorepulsion involved in postnatal olfactory bulb interneuron migration (GO:0021836)	2	2	0.02	+	83.92	0.000278	0.0151
bronchus cartilage development (GO:0060532)	2	2	0.02	+	83.92	0.000278	0.0151
epithelial cell proliferation involved in prostatic bud elongation (GO:0060517)	1	1	0.01	+	83.92	0.0118	0.214
smoothened signaling pathway involved in lung development (GO:0060506)	1	1	0.01	+	83.92	0.0118	0.213
glutamine catabolic process (GO:0006543)	3	2	0.04	+	55.95	0.000622	0.0286
glutamate biosynthetic process (GO:0006537)	3	2	0.04	+	55.95	0.000622	0.0285
positive regulation of intracellular mRNA localization (GO:1904582)	3	2	0.04	+	55.95	0.000622	0.0285
positive regulation of TRAIL-activated apoptotic signaling pathway (GO:1903984)	3	2	0.04	+	55.95	0.000622	0.0284
postnatal olfactory bulb interneuron migration (GO:0021827)	3	2	0.04	+	55.95	0.000622	0.0283
substrate-dependent cerebral cortex tangential migration (GO:0021825)	3	2	0.04	+	55.95	0.000622	0.0282
cerebral cortex tangential migration using cell-cell interactions (GO:0021823)	3	2	0.04	+	55.95	0.000622	0.0281
response to heparin (GO:0071503)	5	3	0.06	+	50.35	3.33e-05	0.00288
post-embryonic hemopoiesis (GO:0035166)	6	3	0.07	+	41.96	5.71e-05	0.0045
positive regulation of B cell tolerance induction (GO:0002663)	2	1	0.02	+	41.96	0.0236	0.344
regulation of B cell tolerance induction (GO:0002661)	2	1	0.02	+	41.96	0.0236	0.343
negative regulation of germinal center formation (GO:0002635)	2	1	0.02	+	41.96	0.0236	0.343
D-amino acid catabolic process (GO:0019478)	2	1	0.02	+	41.96	0.0236	0.343
cell-cell signaling involved in lung development (GO:0060495)	2	1	0.02	+	41.96	0.0236	0.342
isoprenoid biosynthetic process via mevalonate (GO:1902767)	2	1	0.02	+	41.96	0.0236	0.342
response to lipid hydroperoxide (GO:0006982)	2	1	0.02	+	41.96	0.0236	0.342
farnesyl diphosphate biosynthetic process, mevalonate pathway (GO:0010142)	2	1	0.02	+	41.96	0.0236	0.341
central tolerance induction (GO:0002508)	2	1	0.02	+	41.96	0.0236	0.341
rhombomere 3 morphogenesis (GO:0021658)	2	1	0.02	+	41.96	0.0236	0.341
regulation of TRAIL-activated apoptotic signaling pathway (GO:1903121)	4	2	0.05	+	41.96	0.0011	0.0422
central nervous system morphogenesis (GO:0021551)	2	1	0.02	+	41.96	0.0236	0.34
regulation of exocyst assembly (GO:0001928)	2	1	0.02	+	41.96	0.0236	0.34
cell-cell signaling involved in metanephros development (GO:0072204)	2	1	0.02	+	41.96	0.0236	0.34
negative regulation of dendritic cell differentiation (GO:2001199)	4	2	0.05	+	41.96	0.0011	0.0421
negative regulation of complement activation, lectin pathway (GO:0001869)	2	1	0.02	+	41.96	0.0236	0.34
regulation of complement activation, lectin pathway (GO:0001868)	2	1	0.02	+	41.96	0.0236	0.339
male germ-line sex determination (GO:0019100)	2	1	0.02	+	41.96	0.0236	0.339
trophectodermal cell fate commitment (GO:0001830)	2	1	0.02	+	41.96	0.0236	0.339
positive regulation of male mating behavior (GO:1902437)	2	1	0.02	+	41.96	0.0236	0.338
spermidine acetylation (GO:0032918)	2	1	0.02	+	41.96	0.0236	0.338
polyamine acetylation (GO:0032917)	2	1	0.02	+	41.96	0.0236	0.338
establishment of planar polarity involved in nephron morphogenesis (GO:0072046)	2	1	0.02	+	41.96	0.0236	0.337
negative regulation of Notch signaling pathway involved in somitogenesis (GO:1902367)	2	1	0.02	+	41.96	0.0236	0.337
regulation of Notch signaling pathway involved in somitogenesis (GO:1902366)	2	1	0.02	+	41.96	0.0236	0.337
metabolism by host of substance in symbiont (GO:0052419)	2	1	0.02	+	41.96	0.0236	0.336
metabolism by host of symbiont macromolecule (GO:0052416)	2	1	0.02	+	41.96	0.0236	0.336
serotonin biosynthetic process from tryptophan (GO:0006587)	2	1	0.02	+	41.96	0.0236	0.336
ethanolamine metabolic process (GO:0006580)	2	1	0.02	+	41.96	0.0236	0.336
negative regulation of low-density lipoprotein particle receptor catabolic process (GO:0032804)	2	1	0.02	+	41.96	0.0236	0.335
negative regulation of relaxation of cardiac muscle (GO:1901898)	2	1	0.02	+	41.96	0.0236	0.335
cellular response to heparin (GO:0071504)	4	2	0.05	+	41.96	0.0011	0.042
negative regulation of hepatic stellate cell activation (GO:2000490)	2	1	0.02	+	41.96	0.0236	0.335
catabolism by host of substance in symbiont (GO:0052364)	2	1	0.02	+	41.96	0.0236	0.334
catabolism by organism of macromolecule in other organism involved in symbiotic interaction (GO:0052361)	2	1	0.02	+	41.96	0.0236	0.334
catabolism by host of symbiont macromolecule (GO:0052360)	2	1	0.02	+	41.96	0.0236	0.334
mesenchymal cell differentiation involved in bone development (GO:1901706)	2	1	0.02	+	41.96	0.0236	0.333
negative regulation of chemokine (C-X-C motif) ligand 2 production (GO:2000342)	2	1	0.02	+	41.96	0.0236	0.333
metabolism of macromolecule in other organism involved in symbiotic interaction (GO:0052229)	2	1	0.02	+	41.96	0.0236	0.333
catabolism of substance in other organism involved in symbiotic interaction (GO:0052227)	2	1	0.02	+	41.96	0.0236	0.333
metabolism of substance in other organism involved in symbiotic interaction (GO:0052214)	2	1	0.02	+	41.96	0.0236	0.332
interleukin-1 alpha production (GO:0032610)	2	1	0.02	+	41.96	0.0236	0.332
DNA double-strand break attachment to nuclear envelope (GO:1990683)	2	1	0.02	+	41.96	0.0236	0.332
uracil catabolic process (GO:0006212)	2	1	0.02	+	41.96	0.0236	0.331
regulation of norepinephrine uptake (GO:0051621)	2	1	0.02	+	41.96	0.0236	0.331
response to interleukin-11 (GO:0071105)	2	1	0.02	+	41.96	0.0236	0.331
calcitonin gene-related peptide receptor signaling pathway (GO:1990408)	2	1	0.02	+	41.96	0.0236	0.33
N-terminal peptidyl-glycine N-myristoylation (GO:0018008)	2	1	0.02	+	41.96	0.0236	0.33
response to leptomycin B (GO:1901344)	2	1	0.02	+	41.96	0.0236	0.33
positive regulation of high-density lipoprotein particle assembly (GO:0090108)	2	1	0.02	+	41.96	0.0236	0.33
negative regulation of negative chemotaxis (GO:0050925)	2	1	0.02	+	41.96	0.0236	0.329
regulation of negative chemotaxis (GO:0050923)	4	2	0.05	+	41.96	0.0011	0.0419
negative regulation of lung goblet cell differentiation (GO:1901250)	2	1	0.02	+	41.96	0.0236	0.329
positive regulation of receptor-mediated endocytosis involved in cholesterol transport (GO:1905602)	2	1	0.02	+	41.96	0.0236	0.329
regulation of lung goblet cell differentiation (GO:1901249)	2	1	0.02	+	41.96	0.0236	0.328
regulation of blastocyst development (GO:0120222)	4	2	0.05	+	41.96	0.0011	0.0418
positive regulation of uterine smooth muscle relaxation (GO:1900721)	2	1	0.02	+	41.96	0.0236	0.328
regulation of uterine smooth muscle relaxation (GO:1900719)	2	1	0.02	+	41.96	0.0236	0.328
regulation of low-density lipoprotein particle receptor binding (GO:1905595)	2	1	0.02	+	41.96	0.0236	0.328
positive regulation of low-density lipoprotein particle clearance (GO:1905581)	2	1	0.02	+	41.96	0.0236	0.327
multi-organism catabolic process (GO:0044035)	2	1	0.02	+	41.96	0.0236	0.327
box H/ACA snoRNP assembly (GO:0000493)	2	1	0.02	+	41.96	0.0236	0.327
inorganic anion import across plasma membrane (GO:0098658)	2	1	0.02	+	41.96	0.0236	0.326
corticosteroid hormone secretion (GO:0035930)	2	1	0.02	+	41.96	0.0236	0.326
Fas signaling pathway (GO:0036337)	2	1	0.02	+	41.96	0.0236	0.326
innate vocalization behavior (GO:0098582)	2	1	0.02	+	41.96	0.0236	0.326
telomerase holoenzyme complex assembly (GO:1905323)	4	2	0.05	+	41.96	0.0011	0.0417
adrenal cortex formation (GO:0035802)	2	1	0.02	+	41.96	0.0236	0.325
negative regulation of beta-catenin-TCF complex assembly (GO:1904864)	2	1	0.02	+	41.96	0.0236	0.325
regulation of beta-catenin-TCF complex assembly (GO:1904863)	2	1	0.02	+	41.96	0.0236	0.325
negative regulation of interleukin-6-mediated signaling pathway (GO:0070104)	2	1	0.02	+	41.96	0.0236	0.324
interleukin-12-mediated signaling pathway (GO:0035722)	2	1	0.02	+	41.96	0.0236	0.324
positive regulation of metalloendopeptidase activity (GO:1904685)	2	1	0.02	+	41.96	0.0236	0.324
regulation of intracellular mRNA localization (GO:1904580)	4	2	0.05	+	41.96	0.0011	0.0416
positive regulation of TORC2 signaling (GO:1904515)	2	1	0.02	+	41.96	0.0236	0.324
negative regulation of Schwann cell migration (GO:1900148)	2	1	0.02	+	41.96	0.0236	0.323
antifungal innate immune response (GO:0061760)	2	1	0.02	+	41.96	0.0236	0.323
radial spoke assembly (GO:0062177)	2	1	0.02	+	41.96	0.0236	0.323
positive regulation of aspartate secretion (GO:1904450)	2	1	0.02	+	41.96	0.0236	0.322
regulation of aspartate secretion (GO:1904448)	2	1	0.02	+	41.96	0.0236	0.322
positive regulation of high-density lipoprotein particle clearance (GO:0010983)	2	1	0.02	+	41.96	0.0236	0.322
regulation of TORC2 signaling (GO:1903939)	2	1	0.02	+	41.96	0.0236	0.322
cellular stress response to acid chemical (GO:0097533)	2	1	0.02	+	41.96	0.0236	0.321
stress response to acid chemical (GO:0097532)	2	1	0.02	+	41.96	0.0236	0.321
glutamate secretion, neurotransmission (GO:0061535)	2	1	0.02	+	41.96	0.0236	0.321
gamma-aminobutyric acid secretion, neurotransmission (GO:0061534)	2	1	0.02	+	41.96	0.0236	0.32
regulation of polynucleotide adenylyltransferase activity (GO:1904245)	2	1	0.02	+	41.96	0.0236	0.32
cell-cell signaling involved in kidney development (GO:0060995)	2	1	0.02	+	41.96	0.0236	0.32
uracil metabolic process (GO:0019860)	2	1	0.02	+	41.96	0.0236	0.32
cerebellum vasculature development (GO:0061300)	2	1	0.02	+	41.96	0.0236	0.319
growth plate cartilage chondrocyte proliferation (GO:0003419)	2	1	0.02	+	41.96	0.0236	0.319
optic vesicle morphogenesis (GO:0003404)	2	1	0.02	+	41.96	0.0236	0.319
negative regulation of G protein-coupled receptor internalization (GO:1904021)	2	1	0.02	+	41.96	0.0236	0.319
canonical Wnt signaling pathway involved in metanephric kidney development (GO:0061290)	2	1	0.02	+	41.96	0.0236	0.318
Wnt signaling pathway involved in kidney development (GO:0061289)	2	1	0.02	+	41.96	0.0236	0.318
cellular response to leptomycin B (GO:0072750)	2	1	0.02	+	41.96	0.0236	0.318
septum transversum development (GO:0003343)	2	1	0.02	+	41.96	0.0236	0.317
proepicardium development (GO:0003342)	2	1	0.02	+	41.96	0.0236	0.317
response to injury involved in regulation of muscle adaptation (GO:0014876)	2	1	0.02	+	41.96	0.0236	0.317
mesenchymal cell apoptotic process (GO:0097152)	2	1	0.02	+	41.96	0.0236	0.317
neural plate axis specification (GO:0021997)	2	1	0.02	+	41.96	0.0236	0.316
corticospinal neuron axon guidance (GO:0021966)	2	1	0.02	+	41.96	0.0236	0.316
negative regulation of muscle hyperplasia (GO:0014740)	2	1	0.02	+	41.96	0.0236	0.316
negative regulation of muscle atrophy (GO:0014736)	2	1	0.02	+	41.96	0.0236	0.316
forebrain astrocyte development (GO:0021897)	2	1	0.02	+	41.96	0.0236	0.315
forebrain astrocyte differentiation (GO:0021896)	2	1	0.02	+	41.96	0.0236	0.315
primary sex determination, germ-line (GO:0007542)	2	1	0.02	+	41.96	0.0236	0.315
primary sex determination (GO:0007538)	2	1	0.02	+	41.96	0.0236	0.315
primary prostatic bud elongation (GO:0060516)	2	1	0.02	+	41.96	0.0236	0.314
response to laminar fluid shear stress (GO:0034616)	7	3	0.08	+	35.97	8.99e-05	0.00643
mammary duct terminal end bud growth (GO:0060763)	7	3	0.08	+	35.97	8.99e-05	0.0064
growth hormone receptor signaling pathway via JAK-STAT (GO:0060397)	5	2	0.06	+	33.57	0.0017	0.0584
cellular response to hyperoxia (GO:0071455)	5	2	0.06	+	33.57	0.0017	0.0583
glutamate homeostasis (GO:0090461)	5	2	0.06	+	33.57	0.0017	0.0582
positive regulation of lipoprotein particle clearance (GO:0010986)	5	2	0.06	+	33.57	0.0017	0.0581
negative regulation of Rac protein signal transduction (GO:0035021)	5	2	0.06	+	33.57	0.0017	0.0579
positive regulation of skeletal muscle cell proliferation (GO:0014858)	5	2	0.06	+	33.57	0.0017	0.0578
negative regulation of cardiac muscle hypertrophy in response to stress (GO:1903243)	6	2	0.07	+	27.97	0.00243	0.0772
germ-line sex determination (GO:0018992)	3	1	0.04	+	27.97	0.0351	0.417
thymidine metabolic process (GO:0046104)	3	1	0.04	+	27.97	0.0351	0.417
positive regulation of dopamine biosynthetic process (GO:1903181)	3	1	0.04	+	27.97	0.0351	0.416
regulation of dopamine biosynthetic process (GO:1903179)	3	1	0.04	+	27.97	0.0351	0.416
positive regulation of growth hormone receptor signaling pathway (GO:0060399)	3	1	0.04	+	27.97	0.0351	0.416
interferon-gamma-mediated signaling pathway (GO:0060333)	6	2	0.07	+	27.97	0.00243	0.0771
tangential migration from the subventricular zone to the olfactory bulb (GO:0022028)	9	3	0.11	+	27.97	0.000188	0.0112
positive regulation of cytotoxic T cell differentiation (GO:0045585)	3	1	0.04	+	27.97	0.0351	0.415
regulation of cytotoxic T cell differentiation (GO:0045583)	3	1	0.04	+	27.97	0.0351	0.415
regulation of semaphorin-plexin signaling pathway (GO:2001260)	3	1	0.04	+	27.97	0.0351	0.415
rhombomere morphogenesis (GO:0021593)	3	1	0.04	+	27.97	0.0351	0.414
selenium compound metabolic process (GO:0001887)	3	1	0.04	+	27.97	0.0351	0.414
ureter urothelium development (GO:0072190)	3	1	0.04	+	27.97	0.0351	0.414
positive regulation of adenosine receptor signaling pathway (GO:0060168)	3	1	0.04	+	27.97	0.0351	0.414
negative regulation of receptor catabolic process (GO:2000645)	3	1	0.04	+	27.97	0.0351	0.413
negative regulation of smooth muscle cell chemotaxis (GO:0071672)	3	1	0.04	+	27.97	0.0351	0.413
negative regulation of granulocyte chemotaxis (GO:0071623)	3	1	0.04	+	27.97	0.0351	0.413
farnesyl diphosphate biosynthetic process (GO:0045337)	3	1	0.04	+	27.97	0.0351	0.412
renal vesicle induction (GO:0072034)	3	1	0.04	+	27.97	0.0351	0.412
aspartate catabolic process (GO:0006533)	3	1	0.04	+	27.97	0.0351	0.412
sequestering of BMP from receptor via BMP binding (GO:0038098)	3	1	0.04	+	27.97	0.0351	0.411
cellular response to laminar fluid shear stress (GO:0071499)	6	2	0.07	+	27.97	0.00243	0.0769
ovarian cumulus expansion (GO:0001550)	3	1	0.04	+	27.97	0.0351	0.411
regulation of kainate selective glutamate receptor activity (GO:2000312)	3	1	0.04	+	27.97	0.0351	0.411
interleukin-21 production (GO:0032625)	3	1	0.04	+	27.97	0.0351	0.41
thymine catabolic process (GO:0006210)	3	1	0.04	+	27.97	0.0351	0.41
pyrimidine nucleobase catabolic process (GO:0006208)	3	1	0.04	+	27.97	0.0351	0.41
negative regulation of adenylate cyclase-activating adrenergic receptor signaling pathway involved in heart process (GO:0140199)	3	1	0.04	+	27.97	0.0351	0.41
transepithelial ammonium transport (GO:0070634)	3	1	0.04	+	27.97	0.0351	0.409
negative regulation of determination of dorsal identity (GO:2000016)	3	1	0.04	+	27.97	0.0351	0.409
retrograde axonal transport of mitochondrion (GO:0098958)	3	1	0.04	+	27.97	0.0351	0.409
epidermal cell fate specification (GO:0009957)	3	1	0.04	+	27.97	0.0351	0.408
membrane depolarization during atrial cardiac muscle cell action potential (GO:0098912)	3	1	0.04	+	27.97	0.0351	0.408
regulation of high-density lipoprotein particle assembly (GO:0090107)	3	1	0.04	+	27.97	0.0351	0.408
negative regulation of monocyte chemotaxis (GO:0090027)	6	2	0.07	+	27.97	0.00243	0.0768
negative regulation of neutrophil chemotaxis (GO:0090024)	3	1	0.04	+	27.97	0.0351	0.407
mucociliary clearance (GO:0120197)	6	2	0.07	+	27.97	0.00243	0.0766
positive regulation of relaxation of smooth muscle (GO:1901082)	3	1	0.04	+	27.97	0.0351	0.407
intestinal stem cell homeostasis (GO:0036335)	3	1	0.04	+	27.97	0.0351	0.407
adrenal cortex development (GO:0035801)	3	1	0.04	+	27.97	0.0351	0.407
microtubule sliding (GO:0051012)	3	1	0.04	+	27.97	0.0351	0.406
negative regulation of chemokine-mediated signaling pathway (GO:0070100)	6	2	0.07	+	27.97	0.00243	0.0765
positive regulation of glutamate receptor signaling pathway (GO:1900451)	3	1	0.04	+	27.97	0.0351	0.406
regulation of sulfur amino acid metabolic process (GO:0031335)	3	1	0.04	+	27.97	0.0351	0.406
gamma-aminobutyric acid biosynthetic process (GO:0009449)	3	1	0.04	+	27.97	0.0351	0.405
fused antrum stage (GO:0048165)	3	1	0.04	+	27.97	0.0351	0.405
establishment of left/right asymmetry (GO:0061966)	3	1	0.04	+	27.97	0.0351	0.405
intrahepatic bile duct development (GO:0035622)	3	1	0.04	+	27.97	0.0351	0.404
C-terminal protein deglutamylation (GO:0035609)	3	1	0.04	+	27.97	0.0351	0.404
regulation of metalloendopeptidase activity (GO:1904683)	6	2	0.07	+	27.97	0.00243	0.0763
dendrite regeneration (GO:0031104)	3	1	0.04	+	27.97	0.0351	0.404
mating plug formation (GO:0042628)	3	1	0.04	+	27.97	0.0351	0.404
nuclear-transcribed mRNA catabolic process, deadenylation-independent decay (GO:0031086)	6	2	0.07	+	27.97	0.00243	0.0762
regulation of high-density lipoprotein particle clearance (GO:0010982)	3	1	0.04	+	27.97	0.0351	0.403
Roundabout signaling pathway (GO:0035385)	6	2	0.07	+	27.97	0.00243	0.076
stomach development (GO:0062094)	3	1	0.04	+	27.97	0.0351	0.403
regulation of protein localization to cell-cell junction (GO:0150106)	3	1	0.04	+	27.97	0.0351	0.403
brain segmentation (GO:0035284)	3	1	0.04	+	27.97	0.0351	0.402
central nervous system segmentation (GO:0035283)	3	1	0.04	+	27.97	0.0351	0.402
vitamin E metabolic process (GO:0042360)	3	1	0.04	+	27.97	0.0351	0.402
neuroblast migration (GO:0097402)	3	1	0.04	+	27.97	0.0351	0.402
regulation of glutathione biosynthetic process (GO:1903786)	3	1	0.04	+	27.97	0.0351	0.401
negative regulation of adipose tissue development (GO:1904178)	3	1	0.04	+	27.97	0.0351	0.401
thymine metabolic process (GO:0019859)	3	1	0.04	+	27.97	0.0351	0.401
growth plate cartilage chondrocyte growth (GO:0003430)	3	1	0.04	+	27.97	0.0351	0.4
activation of cysteine-type endopeptidase activity involved in apoptotic signaling pathway (GO:0097296)	3	1	0.04	+	27.97	0.0351	0.4
negative regulation of lamellipodium assembly (GO:0010593)	3	1	0.04	+	27.97	0.0351	0.4
prostate gland stromal morphogenesis (GO:0060741)	3	1	0.04	+	27.97	0.0351	0.4
D-amino acid metabolic process (GO:0046416)	3	1	0.04	+	27.97	0.0351	0.399
negative regulation of smoothened signaling pathway involved in ventral spinal cord patterning (GO:0021914)	3	1	0.04	+	27.97	0.0351	0.399
negative regulation of muscle adaptation (GO:0014745)	12	4	0.14	+	27.97	1.52e-05	0.00144
regulation of muscle hyperplasia (GO:0014738)	3	1	0.04	+	27.97	0.0351	0.399
regulation of neural retina development (GO:0061074)	3	1	0.04	+	27.97	0.0351	0.398
cardiac muscle tissue regeneration (GO:0061026)	3	1	0.04	+	27.97	0.0351	0.398
positive regulation of autophagy in response to ER overload (GO:0034263)	3	1	0.04	+	27.97	0.0351	0.398
spermine catabolic process (GO:0046208)	3	1	0.04	+	27.97	0.0351	0.398
metanephric nephron tubule morphogenesis (GO:0072282)	7	2	0.08	+	23.98	0.00328	0.0951
regulation of dendritic cell differentiation (GO:2001198)	7	2	0.08	+	23.98	0.00328	0.0949
regulation of keratinocyte apoptotic process (GO:1902172)	7	2	0.08	+	23.98	0.00328	0.0948
response to nitrosative stress (GO:0051409)	7	2	0.08	+	23.98	0.00328	0.0946
response to hyperoxia (GO:0055093)	7	2	0.08	+	23.98	0.00328	0.0944
embryonic heart tube left/right pattern formation (GO:0060971)	7	2	0.08	+	23.98	0.00328	0.0942
negative regulation of cardiac muscle adaptation (GO:0010616)	7	2	0.08	+	23.98	0.00328	0.0941
cerebral cortex tangential migration (GO:0021800)	7	2	0.08	+	23.98	0.00328	0.0939
amino acid homeostasis (GO:0080144)	7	2	0.08	+	23.98	0.00328	0.0937
histone H4 deacetylation (GO:0070933)	11	3	0.13	+	22.89	0.000337	0.0172
left/right axis specification (GO:0070986)	12	3	0.14	+	20.98	0.000433	0.0215
adherens junction assembly (GO:0034333)	12	3	0.14	+	20.98	0.000433	0.0215
forebrain anterior/posterior pattern specification (GO:0021797)	4	1	0.05	+	20.98	0.0465	0.494
negative regulation of endodermal cell differentiation (GO:1903225)	4	1	0.05	+	20.98	0.0465	0.493
pyrimidine deoxyribonucleoside metabolic process (GO:0046125)	4	1	0.05	+	20.98	0.0465	0.493
deoxyribonucleoside catabolic process (GO:0046121)	4	1	0.05	+	20.98	0.0465	0.493
regulation of MyD88-dependent toll-like receptor signaling pathway (GO:0034124)	4	1	0.05	+	20.98	0.0465	0.492
compartment pattern specification (GO:0007386)	4	1	0.05	+	20.98	0.0465	0.492
negative regulation of neutrophil migration (GO:1902623)	4	1	0.05	+	20.98	0.0465	0.492
positive regulation of transcription by glucose (GO:0046016)	4	1	0.05	+	20.98	0.0465	0.491
regulation of T cell homeostatic proliferation (GO:0046013)	4	1	0.05	+	20.98	0.0465	0.491
negative regulation of adenylate cyclase-activating adrenergic receptor signaling pathway (GO:0071878)	4	1	0.05	+	20.98	0.0465	0.491
response to iron(II) ion (GO:0010040)	4	1	0.05	+	20.98	0.0465	0.49
dorsal/ventral axon guidance (GO:0033563)	4	1	0.05	+	20.98	0.0465	0.49
rhombomere 5 development (GO:0021571)	4	1	0.05	+	20.98	0.0465	0.49
vitellogenesis (GO:0007296)	4	1	0.05	+	20.98	0.0465	0.489
rhombomere 3 development (GO:0021569)	4	1	0.05	+	20.98	0.0465	0.489
lactate biosynthetic process from pyruvate (GO:0019244)	4	1	0.05	+	20.98	0.0465	0.489
metanephric nephron tubule formation (GO:0072289)	4	1	0.05	+	20.98	0.0465	0.488
JUN phosphorylation (GO:0007258)	4	1	0.05	+	20.98	0.0465	0.488
positive regulation of mesenchymal stem cell differentiation (GO:2000741)	4	1	0.05	+	20.98	0.0465	0.488
ureter smooth muscle cell differentiation (GO:0072193)	4	1	0.05	+	20.98	0.0465	0.487
ureter smooth muscle development (GO:0072191)	4	1	0.05	+	20.98	0.0465	0.487
regulation of adenosine receptor signaling pathway (GO:0060167)	4	1	0.05	+	20.98	0.0465	0.487
negative regulation of primary miRNA processing (GO:2000635)	4	1	0.05	+	20.98	0.0465	0.486
regulation of primary miRNA processing (GO:2000634)	4	1	0.05	+	20.98	0.0465	0.486
regulation of male mating behavior (GO:1902435)	4	1	0.05	+	20.98	0.0465	0.486
farnesyl diphosphate metabolic process (GO:0045338)	4	1	0.05	+	20.98	0.0465	0.485
epithelial cell proliferation involved in renal tubule morphogenesis (GO:2001013)	4	1	0.05	+	20.98	0.0465	0.485
cerebrospinal fluid secretion (GO:0033326)	4	1	0.05	+	20.98	0.0465	0.485
oncostatin-M-mediated signaling pathway (GO:0038165)	4	1	0.05	+	20.98	0.0465	0.484
polyamine catabolic process (GO:0006598)	4	1	0.05	+	20.98	0.0465	0.484
astrocyte fate commitment (GO:0060018)	4	1	0.05	+	20.98	0.0465	0.484
nodal signaling pathway involved in determination of left/right asymmetry (GO:0038107)	4	1	0.05	+	20.98	0.0465	0.483
gamma-aminobutyric acid import (GO:0051939)	4	1	0.05	+	20.98	0.0465	0.483
cellular response to nitrosative stress (GO:0071500)	4	1	0.05	+	20.98	0.0465	0.483
telomerase RNA stabilization (GO:0090669)	4	1	0.05	+	20.98	0.0465	0.482
p38MAPK cascade (GO:0038066)	8	2	0.1	+	20.98	0.00425	0.115
N-terminal protein myristoylation (GO:0006499)	4	1	0.05	+	20.98	0.0465	0.482
positive regulation of Schwann cell differentiation (GO:0014040)	4	1	0.05	+	20.98	0.0465	0.482
regulation of Schwann cell differentiation (GO:0014038)	4	1	0.05	+	20.98	0.0465	0.482
protein myristoylation (GO:0018377)	4	1	0.05	+	20.98	0.0465	0.481
negative regulation of mitochondrial membrane permeability involved in apoptotic process (GO:1902109)	4	1	0.05	+	20.98	0.0465	0.481
cellular response to corticotropin-releasing hormone stimulus (GO:0071376)	4	1	0.05	+	20.98	0.0465	0.481
cellular response to interleukin-12 (GO:0071349)	4	1	0.05	+	20.98	0.0465	0.48
protein insertion into mitochondrial outer membrane (GO:0045040)	4	1	0.05	+	20.98	0.0465	0.48
negative regulation of long-chain fatty acid import into cell (GO:0140213)	4	1	0.05	+	20.98	0.0465	0.48
regulation of glutamate metabolic process (GO:2000211)	4	1	0.05	+	20.98	0.0465	0.479
peptidyl-glycine modification (GO:0018201)	4	1	0.05	+	20.98	0.0465	0.479
negative regulation of serotonin uptake (GO:0051612)	4	1	0.05	+	20.98	0.0465	0.479
L-aspartate transmembrane transport (GO:0070778)	4	1	0.05	+	20.98	0.0465	0.478
regulation of adenylate cyclase-activating adrenergic receptor signaling pathway involved in heart process (GO:0140192)	4	1	0.05	+	20.98	0.0465	0.478
negative regulation of neurotransmitter uptake (GO:0051581)	4	1	0.05	+	20.98	0.0465	0.478
positive regulation of intracellular cholesterol transport (GO:0032385)	4	1	0.05	+	20.98	0.0465	0.477
positive regulation of intracellular sterol transport (GO:0032382)	4	1	0.05	+	20.98	0.0465	0.477
positive regulation of intracellular lipid transport (GO:0032379)	4	1	0.05	+	20.98	0.0465	0.477
L-aspartate import across plasma membrane (GO:0140009)	4	1	0.05	+	20.98	0.0465	0.477
positive regulation of male gonad development (GO:2000020)	8	2	0.1	+	20.98	0.00425	0.114
proximal/distal axis specification (GO:0009946)	4	1	0.05	+	20.98	0.0465	0.476
detection of temperature stimulus involved in thermoception (GO:0050960)	4	1	0.05	+	20.98	0.0465	0.476
myoblast fate commitment (GO:0048625)	4	1	0.05	+	20.98	0.0465	0.476
regulation of receptor-mediated endocytosis involved in cholesterol transport (GO:1905600)	4	1	0.05	+	20.98	0.0465	0.475
negative regulation of inclusion body assembly (GO:0090084)	8	2	0.1	+	20.98	0.00425	0.114
positive regulation of low-density lipoprotein receptor activity (GO:1905599)	4	1	0.05	+	20.98	0.0465	0.475
primary amino compound biosynthetic process (GO:1901162)	4	1	0.05	+	20.98	0.0465	0.475
Harderian gland development (GO:0070384)	4	1	0.05	+	20.98	0.0465	0.474
snoRNA guided rRNA pseudouridine synthesis (GO:0000454)	4	1	0.05	+	20.98	0.0465	0.474
lens fiber cell apoptotic process (GO:1990086)	4	1	0.05	+	20.98	0.0465	0.474
regulation of mitochondrial ATP synthesis coupled electron transport (GO:1905446)	4	1	0.05	+	20.98	0.0465	0.473
steroid hormone secretion (GO:0035929)	4	1	0.05	+	20.98	0.0465	0.473
regulation of relaxation of smooth muscle (GO:1901080)	4	1	0.05	+	20.98	0.0465	0.473
positive regulation of relaxation of muscle (GO:1901079)	4	1	0.05	+	20.98	0.0465	0.473
inhibition of cysteine-type endopeptidase activity involved in apoptotic process (GO:1990001)	4	1	0.05	+	20.98	0.0465	0.472
regulation of leukocyte adhesion to arterial endothelial cell (GO:1904997)	4	1	0.05	+	20.98	0.0465	0.472
negative regulation of leukocyte adhesion to vascular endothelial cell (GO:1904995)	4	1	0.05	+	20.98	0.0465	0.472
response to corticotropin-releasing hormone (GO:0043435)	4	1	0.05	+	20.98	0.0465	0.471
positive regulation of calcium ion transmembrane transport via high voltage-gated calcium channel (GO:1904879)	4	1	0.05	+	20.98	0.0465	0.471
establishment or maintenance of microtubule cytoskeleton polarity (GO:0030951)	4	1	0.05	+	20.98	0.0465	0.471
positive regulation of connective tissue replacement (GO:1905205)	4	1	0.05	+	20.98	0.0465	0.47
manchette assembly (GO:1905198)	4	1	0.05	+	20.98	0.0465	0.47
negative regulation of metalloendopeptidase activity (GO:1904684)	4	1	0.05	+	20.98	0.0465	0.47
limb joint morphogenesis (GO:0036022)	4	1	0.05	+	20.98	0.0465	0.47
sequestering of BMP in extracellular matrix (GO:0035582)	4	1	0.05	+	20.98	0.0465	0.469
nodal signaling pathway involved in determination of lateral mesoderm left/right asymmetry (GO:1900164)	4	1	0.05	+	20.98	0.0465	0.469
positive regulation of histone H3-K9 trimethylation (GO:1900114)	4	1	0.05	+	20.98	0.0465	0.469
tripeptide transmembrane transport (GO:0035443)	4	1	0.05	+	20.98	0.0465	0.468
positive regulation of hemoglobin biosynthetic process (GO:0046985)	4	1	0.05	+	20.98	0.0465	0.468
ketone body biosynthetic process (GO:0046951)	4	1	0.05	+	20.98	0.0465	0.468
peptidyl-lysine deacetylation (GO:0034983)	8	2	0.1	+	20.98	0.00425	0.114
regulation of transcription from RNA polymerase II promoter involved in determination of left/right symmetry (GO:1900094)	4	1	0.05	+	20.98	0.0465	0.467
regulation of skeletal muscle acetylcholine-gated channel clustering (GO:1904393)	8	2	0.1	+	20.98	0.00425	0.114
regulation of transepithelial transport (GO:0150111)	4	1	0.05	+	20.98	0.0465	0.467
glycolipid transport (GO:0046836)	4	1	0.05	+	20.98	0.0465	0.467
regulation of Toll signaling pathway (GO:0008592)	4	1	0.05	+	20.98	0.0465	0.467
serotonin biosynthetic process (GO:0042427)	4	1	0.05	+	20.98	0.0465	0.466
glutathione transmembrane transport (GO:0034775)	4	1	0.05	+	20.98	0.0465	0.466
negative regulation of long-chain fatty acid import across plasma membrane (GO:0010748)	4	1	0.05	+	20.98	0.0465	0.466
positive regulation of transcription via serum response element binding (GO:0010735)	4	1	0.05	+	20.98	0.0465	0.465
negative regulation of hydrogen peroxide biosynthetic process (GO:0010730)	4	1	0.05	+	20.98	0.0465	0.465
negative regulation of transcription from RNA polymerase II promoter in response to hypoxia (GO:0061428)	4	1	0.05	+	20.98	0.0465	0.465
negative regulation of intrinsic apoptotic signaling pathway in response to hydrogen peroxide (GO:1903751)	4	1	0.05	+	20.98	0.0465	0.464
regulation of intrinsic apoptotic signaling pathway in response to hydrogen peroxide (GO:1903750)	4	1	0.05	+	20.98	0.0465	0.464
neutrophil clearance (GO:0097350)	4	1	0.05	+	20.98	0.0465	0.464
chondrocyte development involved in endochondral bone morphogenesis (GO:0003433)	8	2	0.1	+	20.98	0.00425	0.114
chondrocyte hypertrophy (GO:0003415)	4	1	0.05	+	20.98	0.0465	0.464
hematopoietic stem cell migration to bone marrow (GO:0097241)	4	1	0.05	+	20.98	0.0465	0.463
regulation of G protein-coupled receptor internalization (GO:1904020)	4	1	0.05	+	20.98	0.0465	0.463
negative regulation of humoral immune response mediated by circulating immunoglobulin (GO:0002924)	4	1	0.05	+	20.98	0.0465	0.463
prostate gland morphogenetic growth (GO:0060737)	4	1	0.05	+	20.98	0.0465	0.462
actin filament fragmentation (GO:0030043)	4	1	0.05	+	20.98	0.0465	0.462
positive regulation of transcription from RNA polymerase II promoter involved in myocardial precursor cell differentiation (GO:0003257)	4	1	0.05	+	20.98	0.0465	0.462
regulation of mitochondrial electron transport, NADH to ubiquinone (GO:1902956)	4	1	0.05	+	20.98	0.0465	0.462
trachea cartilage development (GO:0060534)	8	2	0.1	+	20.98	0.00425	0.113
cell migration involved in sprouting angiogenesis (GO:0002042)	21	5	0.25	+	19.98	6.42e-06	0.000692
[truncated: 15,327 more rows]

## Sheet: HighScore Dorsal B cells GO
go	ref	obs	expected	pos.neg	fold.enrich	raw.p.value	fdr
[truncated: 15,745 more rows]

[truncated: 3 more sheets: Lineage DE genes, Dorsal Lineage GO, Ventral Lineage GO]
