# Supplementary material for: Single-cell analysis of the ventricular-subventricular zone reveals signatures of dorsal and ventral adult neurogenesis
Source: eLife. 2021 Jul 14;10:e67436. doi: 10.7554/eLife.67436 (PMC8443251; doi:10.7554/eLife.67436)
Supplement: Supplementary file 6. [file elife-67436-supp6.xlsx]

## Sheet: sNucRNASeq_BcellDiffExpress
p_val	avg_log2FC	pct.1_Dorsal	pct.2_Ventral	p_val_adj	gene
4.13581e-181	9.09212	0.867	0.127	2.09627e-176	Slit3
1.56628e-170	12.4103	0.969	0.241	7.93886e-166	Kctd16
2.01996e-166	19.1511	0.969	0.26	1.02384e-161	Ryr3
2.15496e-164	13.3127	0.941	0.235	1.09227e-159	Hs6st3
7.59533e-164	18.5381	0.976	0.295	3.84977e-159	Cntn4
3.07374e-163	6.80748	0.863	0.146	1.55796e-158	Cacna1c
3.91496e-163	15.4493	0.91	0.185	1.98434e-158	Zfp385b
2.1484e-162	12.4912	0.843	0.138	1.08894e-157	Gm10754
7.90858e-162	18.6425	0.922	0.219	4.00854e-157	Dlgap2
4.4275e-161	6.51788	0.788	0.104	2.24412e-156	6530403H02Rik
6.41322e-160	15.5184	1	0.414	3.25061e-155	Cacna2d3
7.83885e-159	11.8157	0.922	0.223	3.9732e-154	Cdh8
1.06603e-154	4.87627	0.918	0.216	5.40328e-150	Gpr158
2.35076e-154	21.1179	0.969	0.322	1.19151e-149	Opcml
3.52548e-154	31.5725	0.996	0.491	1.78692e-149	Cntn5
1.2687e-153	6.20992	0.671	0.066	6.43053e-149	Mhrt
5.13521e-153	11.8531	1	0.476	2.60283e-148	Grm7
1.29277e-152	35.7017	0.996	0.45	6.55251e-148	Pde10a
6.46291e-151	2.66818	0.953	0.287	3.27579e-146	Galntl6
3.69448e-150	48.8853	1	0.638	1.87258e-145	Tenm2
1.34128e-149	30.6874	0.988	0.435	6.7984e-145	Rbfox1
2.55839e-149	19.2721	0.996	0.446	1.29674e-144	Lrrc7
4.01446e-149	6.57145	0.792	0.125	2.03477e-144	Rarb
5.45822e-149	11.6555	0.867	0.179	2.76656e-144	Kcnma1
1.13055e-148	9.04494	0.831	0.151	5.73032e-144	9530059O14Rik
1.93158e-148	8.0606	0.937	0.274	9.79038e-144	Epha6
1.63293e-147	9.1611	0.949	0.291	8.27665e-143	Erc2
1.17355e-146	28.486	0.984	0.432	5.94826e-142	Lrrtm4
3.14989e-146	14.3303	0.992	0.525	1.59655e-141	Kcnq5
9.45863e-146	7.79489	0.882	0.205	4.7942e-141	Egfem1
1.21989e-145	36.2857	1	0.55	6.18312e-141	Dcc
1.45153e-145	46.0144	1	0.679	7.35723e-141	Fgf14
4.45914e-145	17.3938	0.98	0.379	2.26016e-140	Pde7b
7.09441e-145	40.229	1	0.768	3.59587e-140	Phactr1
7.72122e-145	25.8062	1	0.674	3.91358e-140	Lrrc4c
1.17766e-144	27.6691	0.996	0.54	5.96909e-140	Anks1b
5.4752e-144	21.5305	1	0.496	2.77516e-139	Macrod2
3.91273e-143	22.8906	1	0.641	1.9832e-138	Grm5
1.05779e-142	20.0611	0.996	0.69	5.36153e-138	Kcnd2
1.12484e-142	12.4663	0.906	0.244	5.70138e-138	Tenm4
1.98957e-142	32.6321	0.996	0.476	1.00843e-137	Gabrg3
8.31684e-142	31.5629	1	0.733	4.21548e-137	Dlg2.1
1.43502e-141	35.9812	1	0.922	7.27355e-137	Celf2
2.00663e-141	76.4931	1	0.858	1.01708e-136	Nrxn3
4.63117e-141	18.7161	1	0.634	2.34736e-136	Lrp1b
1.25701e-140	6.84352	0.98	0.455	6.37127e-136	Csmd3
3.05021e-140	9.28351	0.941	0.282	1.54603e-135	Galnt13
5.71336e-140	Inf	1	1	2.89588e-135	Malat1
1.25641e-139	15.0444	0.941	0.298	6.36826e-135	Myt1l
1.72115e-139	14.0891	0.941	0.289	8.72381e-135	Lrfn5
2.13293e-139	1.76334	0.851	0.172	1.0811e-134	Samd12
3.13645e-139	1.5157	1	0.729	1.58974e-134	Kcnip4
3.23318e-139	8.24877	0.929	0.285	1.63877e-134	Dpp6
7.20965e-139	38.786	1	0.82	3.65428e-134	Nrg1
7.61588e-139	2.41483	0.835	0.167	3.86019e-134	Xkr4
1.3093e-138	9.86161	0.996	0.597	6.63631e-134	Syt1
1.31996e-138	11.8591	0.933	0.298	6.69035e-134	Gria1
1.16546e-137	14.3265	0.996	0.594	5.90724e-133	Mdga2
2.18558e-137	6.6525	0.816	0.161	1.10778e-132	Grin2a
3.57943e-137	32.8781	1	0.905	1.81427e-132	Nlgn1
8.48182e-137	16.2976	0.992	0.682	4.2991e-132	Ptprd
1.06327e-136	14.9587	0.976	0.387	5.38929e-132	Grin2b
1.28102e-136	3.864	0.694	0.089	6.493e-132	Me3
2.57754e-136	-13.149	0.984	0.636	1.30645e-131	Sgcz
3.7104e-136	2.94172	0.949	0.326	1.88065e-131	Nrg3
6.07537e-136	13.4331	0.992	0.557	3.07936e-131	Cntnap2
1.05443e-135	17.9827	0.973	0.459	5.34451e-131	Ank3
2.61846e-135	11.7885	0.98	0.386	1.32719e-130	Kirrel3
1.3513e-134	4.90503	0.949	0.359	6.84922e-130	Pde4b
1.94051e-134	17.2234	0.996	0.719	9.83565e-130	Il1rapl1
2.11421e-134	21.9244	1	0.855	1.07161e-129	Nkain2
6.006e-134	5.90663	0.906	0.257	3.0442e-129	Pcsk2
6.80667e-134	8.79981	0.855	0.196	3.45003e-129	Enox1
1.23379e-132	5.85773	1	0.833	6.25359e-128	Csmd1
1.36893e-132	6.09926	0.698	0.101	6.93853e-128	Gm28905
2.17988e-132	13.2696	1	0.807	1.10489e-127	Dgkb
1.29201e-131	9.39703	0.91	0.279	6.5487e-127	Dach1
1.66464e-131	11.8905	0.914	0.256	8.43738e-127	Dgki
1.72774e-131	17.5791	0.902	0.269	8.75724e-127	Frmpd4
1.93011e-131	8.23916	0.812	0.169	9.78293e-127	Shisa9
3.06457e-131	14.5788	0.91	0.284	1.55331e-126	Kalrn
5.79152e-131	2.0504	0.847	0.199	2.93549e-126	Prkg1
1.2875e-130	4.6331	0.475	0.024	6.52583e-126	Gm29260
6.14437e-130	21.0464	0.969	0.402	3.11434e-125	Cacnb2
1.02654e-129	8.98785	0.82	0.178	5.2031e-125	5730522E02Rik
1.72053e-129	7.44663	0.808	0.172	8.72068e-125	Kctd8
2.10358e-129	6.65902	0.875	0.217	1.06622e-124	Cacnb4
2.19849e-129	15.9375	0.961	0.387	1.11433e-124	Spock3
3.02126e-129	41.8287	1	0.985	1.53136e-124	Meg3
4.36718e-129	5.75285	0.808	0.167	2.21355e-124	Sntg1
6.80729e-129	4.26642	0.749	0.129	3.45034e-124	Aff3
1.1969e-128	4.87341	0.725	0.113	6.06663e-124	Cntnap5b
1.87512e-128	8.5198	1	0.681	9.50425e-124	Adgrb3
3.86669e-128	-2.21482	0.937	0.312	1.95987e-123	Ptprn2
4.38901e-128	6.51141	0.694	0.1	2.22461e-123	Kcnb2
1.90154e-127	13.7282	0.867	0.233	9.63814e-123	Ntrk3
4.59583e-127	19.2346	0.933	0.323	2.32944e-122	Robo2
1.07344e-126	7.68446	0.839	0.205	5.44083e-122	Unc79
2.21845e-125	32.9775	0.988	0.659	1.12444e-120	Grik2
4.60747e-125	6.6237	0.827	0.19	2.33534e-120	Neto1
5.83055e-125	-3.07204	0.937	0.317	2.95527e-120	Gabrb3
6.92081e-125	5.44486	0.827	0.184	3.50788e-120	Ctnna3
1.95276e-124	9.72379	0.867	0.234	9.89774e-120	Slc24a2
2.48198e-124	7.08002	0.847	0.223	1.25802e-119	Thsd7a
5.22842e-124	6.62784	0.773	0.155	2.65007e-119	Rnf150
8.64413e-124	16.8922	0.98	0.491	4.38136e-119	Dab1
2.36495e-123	15.0308	0.867	0.22	1.1987e-118	Fat3
3.00949e-122	3.16497	0.965	0.441	1.52539e-117	Foxp1
7.13811e-122	4.934	0.875	0.24	3.61802e-117	Asic2
8.9283e-122	-0.609552	0.808	0.179	4.5254e-117	Rbms3
1.36308e-121	4.49606	0.659	0.096	6.90891e-117	Grm1
2.23004e-121	8.8667	0.875	0.254	1.13032e-116	Arl15
5.46699e-121	11.8931	0.753	0.146	2.771e-116	1700003D09Rik
6.15503e-121	26.8066	1	0.795	3.11974e-116	Meis2
1.21464e-120	4.97133	0.855	0.232	6.15655e-116	Lrrtm3
7.4098e-119	7.7235	0.851	0.23	3.75573e-114	Kcnab1
8.02057e-119	24.3931	1	0.835	4.06531e-114	Auts2
1.4254e-118	10.3925	0.992	0.675	7.22477e-114	Plcb1
1.16141e-117	11.3444	0.996	0.775	5.88675e-113	Grid2
1.36652e-117	9.88628	0.753	0.151	6.92636e-113	Zfp804a
1.94412e-117	6.76306	0.765	0.171	9.85396e-113	Brinp1
2.95263e-117	34.3088	1	0.986	1.49657e-112	Lsamp
7.58573e-117	7.29454	0.835	0.223	3.8449e-112	Cacna1e
5.02859e-116	13.0472	0.816	0.204	2.54879e-111	Nol4
1.71036e-115	20.2216	0.992	0.795	8.66916e-111	Ppp3ca
1.13098e-114	12.1105	0.878	0.289	5.73249e-110	Foxp2
1.40776e-114	3.71835	0.592	0.073	7.13537e-110	Syndig1
5.15948e-114	5.13039	0.784	0.188	2.61513e-109	Gria4
5.25561e-113	4.22128	0.839	0.238	2.66386e-108	Cntnap5a
1.7094e-112	8.20792	0.824	0.213	8.66429e-108	Grip1
3.51998e-112	11.4251	0.965	0.448	1.78414e-107	Nbea
3.87166e-112	2.52718	0.694	0.122	1.96239e-107	Plppr1
4.47941e-112	5.78035	0.737	0.157	2.27043e-107	Elmo1
6.5648e-112	39.3246	1	0.935	3.32743e-107	Cadm2
1.02619e-111	2.38618	0.569	0.066	5.20134e-107	Kcnh1
1.83062e-111	5.42355	0.788	0.186	9.27869e-107	Fry
9.69266e-111	2.14511	0.431	0.027	4.91282e-106	Gm14330
1.4816e-110	13.3743	0.984	0.578	7.50963e-106	Gria2
2.70546e-110	4.11388	0.855	0.247	1.37129e-105	Sorbs2
3.77514e-110	11.1944	0.898	0.329	1.91347e-105	Rgs9
9.07953e-110	3.80025	0.533	0.056	4.60205e-105	Arhgap10
1.39663e-109	12.819	1	0.857	7.07894e-105	Ctnna2
1.4679e-109	9.81197	0.851	0.272	7.44022e-105	Mctp1
2.45707e-109	1.30423	0.741	0.156	1.24539e-104	Dpp10
8.11804e-109	2.21122	0.592	0.078	4.11471e-104	Fras1
5.1804e-108	7.66457	0.851	0.277	2.62574e-103	Trerf1
1.52417e-107	5.32431	0.745	0.164	7.72539e-103	Rgs7bp
1.59847e-107	3.5416	0.647	0.107	8.10198e-103	Lhfpl3
9.98536e-107	6.51272	0.894	0.315	5.06118e-102	Dock3
1.4035e-106	5.66376	0.835	0.248	7.11379e-102	Slc2a13
2.29625e-106	6.48791	0.847	0.269	1.16388e-101	Grid1
3.04162e-106	5.7427	0.776	0.192	1.54168e-101	Rims1
4.18714e-106	7.4332	0.671	0.124	2.12229e-101	Clvs1
5.34296e-106	6.572	0.89	0.344	2.70813e-101	Rims2
2.53289e-105	6.06202	0.757	0.176	1.28382e-100	Mpped2
3.43605e-105	-0.52582	0.651	0.113	1.74159e-100	Usp29
4.23858e-105	5.34616	0.839	0.27	2.14837e-100	Nav3
4.79203e-105	30.0697	0.996	0.801	2.42889e-100	Ntm
7.41069e-105	6.02264	0.686	0.133	3.75618e-100	Zdhhc14
1.03452e-104	2.61584	0.659	0.116	5.24356e-100	Msra
2.45899e-104	7.0051	0.871	0.304	1.24636e-99	Large1
3.27005e-104	2.22945	0.604	0.089	1.65746e-99	Klhl29
3.6662e-104	4.26231	0.643	0.107	1.85825e-99	Rasgef1b
5.57689e-104	11.8262	0.765	0.195	2.8267e-99	Pdzd2
1.11694e-103	3.78406	0.659	0.123	5.66131e-99	Frmd5
2.30654e-103	6.82291	0.722	0.16	1.16909e-98	Chsy3
2.98365e-103	4.44284	0.965	0.632	1.51229e-98	Snhg11
3.80996e-103	5.03658	0.8	0.223	1.93112e-98	Gria3
4.38762e-103	-15.864	0.643	0.111	2.22391e-98	Pde1c
9.55881e-103	2.98673	0.588	0.085	4.84498e-98	Dgkh
3.14416e-102	7.18738	0.894	0.356	1.59365e-97	Ccser1
3.187e-102	7.40208	0.851	0.297	1.61536e-97	Osbpl8
6.12264e-102	5.41486	0.725	0.16	3.10332e-97	Rcan2
7.25885e-102	12.2547	0.984	0.761	3.67922e-97	Negr1
8.56883e-102	4.20887	0.741	0.178	4.3432e-97	Ppfia2
7.14948e-101	4.77937	0.663	0.127	3.62379e-96	Hecw2
9.64115e-101	2.41363	0.565	0.079	4.88672e-96	Hs3st5
1.31044e-100	4.42353	0.612	0.101	6.64209e-96	Gprin3
1.904e-100	-3.62726	0.839	0.257	9.65061e-96	Mgat4c
3.29412e-100	7.09282	0.69	0.147	1.66966e-95	Cadps
4.46729e-100	5.0412	0.761	0.185	2.26429e-95	Rgs7
7.84761e-100	7.38122	1	0.76	3.97764e-95	Magi2
8.83135e-100	2.71992	0.996	0.86	4.47626e-95	Pcdh9
1.71101e-99	16.7067	0.941	0.457	8.6724e-95	Atxn1
2.07632e-99	5.53961	0.757	0.189	1.0524e-94	Nkain3
2.45156e-99	5.0239	0.875	0.337	1.2426e-94	Tanc2
4.70247e-99	4.87311	0.655	0.126	2.3835e-94	Etl4
5.35106e-99	7.03498	0.925	0.398	2.71224e-94	Sgip1
6.3748e-99	6.38008	0.855	0.323	3.23113e-94	Cttnbp2
6.897e-99	4.95942	0.722	0.162	3.49582e-94	Tjp1
2.64394e-98	4.41955	0.608	0.102	1.34011e-93	Dlx6os1
3.5064e-98	2.74423	0.698	0.149	1.77725e-93	Rbfox3
4.10676e-98	1.79459	0.506	0.06	2.08155e-93	Fam135b
5.13783e-98	9.93175	0.796	0.241	2.60416e-93	Kcnq3
9.65664e-98	2.43429	0.545	0.073	4.89456e-93	Ksr2
6.01022e-97	2.30037	0.702	0.148	3.04634e-92	Cacna1a
4.71833e-96	14.746	0.973	0.657	2.39153e-91	Adgrl3
9.84859e-96	2.14091	0.435	0.039	4.99185e-91	Gm1043
2.70972e-95	9.1766	0.816	0.25	1.37345e-90	Zswim6
3.77984e-95	7.8689	0.914	0.409	1.91585e-90	Dmd
5.86568e-95	1.36303	0.384	0.026	2.97308e-90	Gm27247
6.42424e-95	2.28554	0.522	0.067	3.25619e-90	5330417C22Rik
4.20937e-94	9.16223	0.965	0.526	2.13356e-89	Stox2
6.88463e-94	5.37315	0.827	0.266	3.48954e-89	Prkce
1.69289e-93	9.32463	0.773	0.235	8.58056e-89	Nebl
1.84106e-93	-4.7377	0.588	0.094	9.33162e-89	Khdrbs2
2.37281e-93	5.68509	1	0.857	1.20268e-88	Rora
3.20898e-93	12.4743	0.941	0.517	1.6265e-88	Atp2b1
4.66999e-93	20.4121	0.961	0.554	2.36703e-88	Alcam
6.77329e-93	2.29285	0.427	0.038	3.43311e-88	Gm14172
1.07687e-92	6.96764	0.882	0.385	5.4582e-88	Camk4
1.57697e-92	4.7155	0.678	0.145	7.99306e-88	Stxbp5l
1.8151e-92	4.04125	0.733	0.194	9.20001e-88	Dtnb
2.7899e-92	6.9955	0.627	0.126	1.41409e-87	Adarb2
4.03076e-92	6.88102	0.839	0.294	2.04303e-87	Gnal
4.72901e-92	6.50459	0.749	0.195	2.39695e-87	Nlk
5.09414e-92	3.07231	0.549	0.082	2.58202e-87	Gabrb2
1.43286e-91	4.96802	0.663	0.138	7.26259e-87	Frmd4b
2.23407e-91	9.36247	0.843	0.344	1.13236e-86	Pcdh7
5.57085e-91	5.19648	0.698	0.162	2.82364e-86	Unc13c
9.5216e-91	5.79363	0.78	0.245	4.82612e-86	Thrb
1.63486e-90	9.14492	0.922	0.438	8.28645e-86	Ncam1
1.77945e-90	3.08531	0.525	0.073	9.01931e-86	Lin7a
2.81217e-90	3.95527	0.675	0.152	1.42538e-85	Pde4dip
3.5147e-90	3.95225	0.612	0.114	1.78146e-85	Otud7a
7.14672e-90	7.8628	0.816	0.27	3.62239e-85	Dip2c
1.45435e-89	3.4338	0.718	0.173	7.37153e-85	Mllt3
1.82096e-89	7.3262	0.733	0.192	9.22971e-85	Dapk1
2.53984e-89	2.37556	0.471	0.055	1.28734e-84	Gm15155
5.37686e-89	10.247	0.604	0.117	2.72531e-84	Prickle1
5.98122e-89	5.57177	0.361	0.024	3.03164e-84	Gm15810
6.21218e-89	7.81539	0.945	0.533	3.14871e-84	Gphn
6.21499e-89	2.18672	0.773	0.235	3.15013e-84	Snhg14
8.38617e-89	-1.28562	0.784	0.258	4.25061e-84	Robo1
8.66814e-89	7.8581	0.812	0.279	4.39353e-84	Pard3
1.44721e-88	4.03927	0.694	0.172	7.3353e-84	Grin1
4.45189e-88	2.06307	0.51	0.071	2.25649e-83	Dscaml1
4.52322e-88	5.32225	0.667	0.151	2.29264e-83	Fam155a
5.13494e-88	3.43366	0.639	0.135	2.6027e-83	Kcnq1ot1
8.77877e-88	1.62015	0.816	0.335	4.44961e-83	Lingo2
2.0831e-87	1.6837	0.506	0.069	1.05584e-82	Esrrg
2.7298e-87	2.73281	0.604	0.113	1.38362e-82	Cpne5
3.4386e-87	2.60948	0.569	0.098	1.74289e-82	A230006K03Rik
5.20181e-87	9.37461	0.89	0.449	2.63659e-82	Sox2ot
7.1897e-87	3.29884	0.69	0.164	3.64417e-82	C230004F18Rik
8.77466e-87	5.10687	0.784	0.251	4.44752e-82	Cacna2d1
3.20644e-86	2.58742	0.522	0.08	1.62522e-81	Srgap1
5.67903e-86	3.33312	0.776	0.261	2.87847e-81	Cnksr2
6.03556e-86	4.14701	0.749	0.22	3.05918e-81	Adam23
1.11059e-85	2.44531	0.541	0.088	5.62916e-81	Sorcs3
1.28673e-85	2.67314	0.525	0.08	6.52193e-81	Nrg2
4.3937e-85	5.10024	0.843	0.312	2.22699e-80	Diaph2
5.13527e-85	2.89823	0.463	0.057	2.60286e-80	Syn3
6.43962e-85	3.13365	0.725	0.195	3.26398e-80	Cap2
8.07844e-85	5.20616	0.898	0.382	4.09464e-80	Ssbp2
1.69627e-84	5.57476	0.753	0.238	8.59771e-80	Cntn1
2.27523e-84	18.3947	0.988	0.876	1.15322e-79	Ctnnd2
2.71599e-84	2.82096	0.651	0.145	1.37663e-79	Prkca
3.43296e-84	7.36448	0.961	0.593	1.74003e-79	Ppp2r2b
7.99223e-84	2.32847	0.486	0.068	4.05094e-79	Adamts3
9.82862e-84	3.82824	0.639	0.147	4.98173e-79	Camk1d
1.104e-83	2.10417	0.369	0.03	5.59575e-79	Igfbpl1
2.1498e-83	-0.342196	0.949	0.608	1.08965e-78	Dlgap1
3.27611e-83	2.76285	0.451	0.055	1.66053e-78	Cdh12
3.40366e-83	3.9666	0.694	0.182	1.72518e-78	Dnm3
4.40727e-83	3.13212	0.533	0.089	2.23387e-78	Tmtc1
6.02977e-83	7.13923	0.788	0.278	3.05625e-78	Sipa1l1
1.73473e-82	2.50182	0.659	0.155	8.79263e-78	Pak3
1.25966e-81	8.53766	0.871	0.35	6.38473e-77	Slc35f1
1.58717e-81	1.49684	0.392	0.038	8.04472e-77	Fam189a1
3.01357e-81	3.75432	0.761	0.232	1.52746e-76	Fbxl17
4.19512e-81	9.08156	0.902	0.466	2.12634e-76	Akap6
6.71042e-81	11.5503	0.678	0.179	3.40124e-76	9330162G02Rik
7.15571e-81	3.59025	0.718	0.213	3.62695e-76	Gm26871
9.14824e-81	4.69286	0.545	0.095	4.63688e-76	Hs3st4
1.26237e-80	1.62987	0.506	0.08	6.39847e-76	Scn1a
1.91212e-80	8.33801	0.863	0.402	9.6918e-76	R3hdm1
3.06736e-80	2.95209	0.616	0.135	1.55472e-75	Sik2
7.35305e-80	2.21524	0.553	0.099	3.72697e-75	Syt6
3.57938e-79	6.75094	0.765	0.257	1.81425e-74	Ano3
3.83673e-79	9.21676	0.776	0.27	1.94468e-74	Hivep2
5.66945e-79	4.86231	0.631	0.15	2.87362e-74	Runx1t1
9.26514e-79	-0.396537	0.643	0.154	4.69613e-74	Sorcs1
1.11796e-78	9.41553	0.929	0.562	5.66648e-74	Map2
3.30402e-78	2.38554	0.576	0.119	1.67468e-73	Rapgef4
6.54541e-78	3.07611	0.627	0.148	3.31761e-73	Atrnl1
1.18059e-77	3.20241	0.639	0.158	5.98393e-73	Ablim2
2.89099e-77	1.67523	0.361	0.032	1.46532e-72	Gm13052
3.50923e-77	3.43645	0.655	0.164	1.77869e-72	Neto2
4.21557e-77	4.9596	0.722	0.221	2.1367e-72	Plekha5
8.81746e-77	2.00688	0.58	0.121	4.46922e-72	Csrnp3
9.41755e-77	3.11423	0.541	0.102	4.77338e-72	Spock1
2.05195e-76	11.3394	0.961	0.669	1.04005e-71	Ntrk2
2.54339e-76	5.28258	0.616	0.143	1.28914e-71	Hs6st2
2.88405e-76	2.00412	0.553	0.107	1.46181e-71	Cacna1d
3.24977e-76	4.19624	0.659	0.172	1.64718e-71	Tmem178b
5.11842e-76	4.30303	0.608	0.138	2.59432e-71	Plcl2
6.45611e-76	4.15766	0.761	0.256	3.27234e-71	Mapk10
9.40918e-76	1.78584	0.361	0.034	4.76914e-71	RP24-189I2.5
1.03834e-75	6.35581	0.584	0.128	5.26294e-71	Ldlrad4
1.24909e-75	2.18337	0.447	0.063	6.33113e-71	Fstl4
1.31185e-75	2.83977	0.584	0.125	6.64925e-71	Galnt18
2.19829e-75	3.30696	0.835	0.339	1.11423e-70	Mbnl2
2.40346e-75	1.86127	0.416	0.052	1.21822e-70	Cntn6
2.65706e-75	2.19886	0.596	0.133	1.34676e-70	Epb41
3.6929e-75	8.49382	1	0.97	1.87178e-70	Zbtb20
4.72816e-75	7.09512	0.804	0.319	2.39652e-70	Syne1
1.59302e-74	1.58334	0.392	0.045	8.07439e-70	Gm13944
1.61592e-74	6.95465	0.961	0.681	8.19044e-70	Arpp21
2.68991e-74	2.47731	0.494	0.083	1.36341e-69	Syt16
3.71704e-74	3.86788	0.769	0.264	1.88402e-69	Mkl2
3.77326e-74	1.37801	0.396	0.046	1.91251e-69	Sptbn4
4.52231e-74	4.31649	0.604	0.141	2.29218e-69	Lmo7
4.66408e-74	1.34293	0.463	0.069	2.36403e-69	Mpp6
1.23628e-73	1.86515	0.573	0.122	6.26622e-69	Xkr6
1.38408e-73	6.08749	0.918	0.59	7.01537e-69	Ank2
1.39009e-73	3.62589	0.686	0.189	7.04581e-69	Ssh2
2.52076e-73	4.51332	0.639	0.165	1.27767e-68	Man1a
2.72735e-73	1.24465	0.4	0.048	1.38238e-68	Sh3rf2
6.24264e-73	4.5275	0.675	0.194	3.16414e-68	Tmem132b
8.20284e-73	2.88979	0.498	0.088	4.15769e-68	Sgk1
1.05567e-72	5.54512	0.91	0.528	5.35077e-68	Ncam2
1.07885e-72	3.88818	0.761	0.259	5.46827e-68	Pde8b
1.18282e-72	2.25942	0.541	0.106	5.99522e-68	Focad
1.24253e-72	6.95396	0.816	0.335	6.29788e-68	Gpatch8
1.44569e-72	3.18722	0.596	0.138	7.3276e-68	St6galnac5
1.92278e-72	4.85238	0.647	0.176	9.7458e-68	Smyd3
2.91796e-72	2.59223	0.569	0.123	1.479e-67	Tnr
3.84401e-72	9.27068	0.878	0.446	1.94838e-67	Tnik
4.39442e-72	7.43174	0.824	0.363	2.22736e-67	Nedd4l
4.59866e-72	5.03451	0.804	0.331	2.33088e-67	Dock4
6.14077e-72	2.71608	0.482	0.08	3.11251e-67	Flrt2
8.22646e-72	6.05166	0.839	0.389	4.16966e-67	Zeb1
1.46362e-71	1.43015	0.361	0.037	7.41852e-67	Ankrd33b
8.22149e-71	3.79632	0.753	0.253	4.16715e-66	Sema6d
1.06847e-70	2.87976	0.478	0.082	5.41566e-66	Trim30a
1.19932e-70	17.1451	0.992	0.734	6.07889e-66	Xist
1.20046e-70	2.65951	0.678	0.201	6.08468e-66	Dok6
1.23495e-70	4.54778	0.694	0.207	6.25946e-66	Eml5
1.55367e-70	4.18629	0.475	0.081	7.87493e-66	Ryr2
1.73041e-70	2.05853	0.624	0.154	8.77075e-66	Gucy1a2
1.9859e-70	8.48873	0.929	0.544	1.00657e-65	Grm3
2.29618e-70	2.08207	0.831	0.363	1.16384e-65	Trim2
3.92869e-70	2.43567	0.631	0.17	1.9913e-65	Agap1
7.83996e-70	4.79739	0.573	0.13	3.97376e-65	Rbms1
8.83322e-70	2.64826	0.494	0.09	4.4772e-65	Gm17231
4.23125e-69	6.26035	0.518	0.105	2.14465e-64	Nyap2
5.85171e-69	2.33996	0.522	0.104	2.966e-64	Plxna2
6.39912e-69	2.62793	0.545	0.119	3.24346e-64	Cdh13
6.79082e-69	6.94903	0.737	0.248	3.44199e-64	Dnmt3a
6.83517e-69	1.06699	0.322	0.029	3.46448e-64	Slc35f3
6.84303e-69	1.92683	0.533	0.11	3.46846e-64	A230057D06Rik
8.294e-69	2.81286	0.51	0.098	4.2039e-64	Sv2c
8.61758e-69	5.94019	0.729	0.256	4.36791e-64	Epha4
1.23871e-68	1.82625	0.424	0.063	6.2785e-64	Actn2
1.30869e-68	2.55068	0.655	0.182	6.63323e-64	Nav2
1.35394e-68	5.32313	0.8	0.325	6.86259e-64	Celf4
1.57562e-68	2.84778	0.557	0.125	7.98618e-64	2010300C02Rik
1.59083e-68	6.73612	0.875	0.496	8.06326e-64	Strbp
2.97117e-68	2.66997	0.463	0.079	1.50597e-63	Iqgap2
3.00482e-68	3.88928	0.525	0.111	1.52303e-63	Plcxd3
3.04028e-68	1.73878	0.482	0.088	1.54099e-63	Cacna1b
3.4295e-68	14.5787	0.588	0.149	1.73828e-63	Cpeb3
4.3985e-68	4.93482	0.839	0.394	2.22942e-63	Elmod1
5.86591e-68	1.94115	0.435	0.067	2.9732e-63	Pdzrn4
7.59877e-68	2.84117	0.463	0.08	3.85151e-63	Ebf1
8.21131e-68	2.80015	0.639	0.175	4.16198e-63	Tcf20
8.53325e-68	1.3739	0.384	0.049	4.32516e-63	Ica1
1.04334e-67	1.31807	0.384	0.049	5.28829e-63	Gm15594
1.20807e-67	2.83231	0.604	0.154	6.12324e-63	Mical3
1.24976e-67	2.62534	0.475	0.086	6.33454e-63	Fam65b
2.66437e-67	1.15504	0.325	0.031	1.35046e-62	Cntnap3
3.52034e-67	2.21845	0.525	0.11	1.78432e-62	Cit
4.11668e-67	1.00079	0.341	0.035	2.08658e-62	Slc8a3
5.05294e-67	8.99699	0.867	0.479	2.56113e-62	Dclk1
5.14516e-67	2.00143	0.553	0.125	2.60787e-62	Jakmip2
7.87146e-67	7.03683	0.945	0.658	3.98973e-62	B3galt1
1.17514e-66	3.779	0.761	0.286	5.95632e-62	Ephb1
1.33497e-66	2.30234	0.557	0.13	6.76641e-62	Epha7
1.45786e-66	4.47381	0.82	0.359	7.3893e-62	Stag1
1.60106e-66	13.7205	0.816	0.424	8.11515e-62	Gm26848
1.62381e-66	8.04188	0.953	0.699	8.23047e-62	Macf1
1.65403e-66	7.00975	0.839	0.41	8.38363e-62	Rere
2.82822e-66	1.23188	0.396	0.054	1.43351e-61	Snrpn
3.51895e-66	3.36568	0.678	0.209	1.78361e-61	Pclo
3.78768e-66	3.39614	0.71	0.241	1.91982e-61	Scmh1
6.21823e-66	5.62923	0.882	0.489	3.15177e-61	Tenm3
7.20192e-66	1.40254	0.404	0.058	3.65037e-61	Ttll11
7.73683e-66	1.24906	0.392	0.054	3.92149e-61	Srrm3
1.08972e-65	1.68084	0.49	0.094	5.52336e-61	Nin
1.5462e-65	1.89125	0.522	0.111	7.83709e-61	Reps2
1.89407e-65	1.233	0.349	0.039	9.60031e-61	Sntb2
2.10516e-65	1.40301	0.396	0.056	1.06702e-60	Osbp2
2.17084e-65	2.39041	0.467	0.085	1.10031e-60	Olfm3
2.28319e-65	2.03815	0.439	0.073	1.15726e-60	4430402I18Rik
2.42197e-65	1.2376	0.408	0.06	1.2276e-60	Zfyve28
2.53989e-65	3.37612	0.553	0.13	1.28737e-60	Eml6
2.54305e-65	2.73314	0.565	0.139	1.28897e-60	Strn
2.96677e-65	2.85536	0.51	0.105	1.50374e-60	Unc5c
2.96699e-65	1.38339	0.412	0.061	1.50385e-60	Gm20754
6.81847e-65	1.41162	0.365	0.045	3.45601e-60	2610307P16Rik
6.87262e-65	2.43955	0.667	0.207	3.48346e-60	Sbf2
1.44068e-64	2.2124	0.561	0.134	7.30223e-60	Sh3kbp1
1.54824e-64	2.50063	0.796	0.339	7.84739e-60	Setbp1
1.73948e-64	3.41343	0.659	0.208	8.81671e-60	Atp6v0a1
1.7897e-64	2.18203	0.651	0.187	9.07127e-60	Epha5
2.11343e-64	2.76421	0.698	0.222	1.07121e-59	Vti1a
2.19107e-64	5.06274	0.722	0.248	1.11056e-59	Gabra2
2.60033e-64	7.69422	0.918	0.589	1.31801e-59	Ppp1r9a
2.7373e-64	1.36904	0.482	0.095	1.38743e-59	Rgs17
4.92622e-64	1.86593	0.502	0.104	2.4969e-59	Pacsin1
6.68536e-64	8.04983	0.824	0.418	3.38854e-59	Slc4a4
7.54275e-64	3.26961	0.671	0.215	3.82312e-59	Arhgap26
1.03881e-63	3.31182	0.886	0.452	5.2653e-59	Sgcd
1.3833e-63	2.11077	0.478	0.091	7.0114e-59	Cers6
2.67448e-63	2.0103	0.439	0.076	1.35559e-58	Sh3rf3
2.87166e-63	3.32657	0.525	0.12	1.45553e-58	Dclk2
3.66913e-63	1.63533	0.545	0.126	1.85973e-58	Fgf12
5.10084e-63	1.56271	0.486	0.096	2.58541e-58	Trank1
1.52131e-62	4.20147	0.678	0.226	7.71092e-58	Vps13b
1.72255e-62	3.39806	0.745	0.288	8.73092e-58	Tcf12
2.06423e-62	2.153	0.565	0.14	1.04628e-57	Ralgapa2
2.70545e-62	8.76324	0.588	0.157	1.37128e-57	Plcl1
2.78698e-62	1.90786	0.514	0.116	1.41261e-57	Osbpl9
5.13908e-62	4.10064	0.816	0.356	2.60479e-57	C130071C03Rik
1.01006e-61	2.75969	0.533	0.126	5.1196e-57	Kctd1
1.06911e-61	4.38381	0.804	0.371	5.4189e-57	Itpr1
1.0912e-61	1.68547	0.514	0.11	5.53085e-57	Gm37376
1.16314e-61	1.37213	0.447	0.081	5.89551e-57	Ypel2
1.31737e-61	4.25779	0.651	0.209	6.67724e-57	Pcdh17
1.33258e-61	0.892571	0.259	0.018	6.75433e-57	1700123O21Rik
1.59937e-61	1.13782	0.443	0.08	8.10657e-57	Gm44593
1.91759e-61	2.79656	0.424	0.072	9.71952e-57	Stk32a
2.89457e-61	2.2205	0.482	0.097	1.46714e-56	D430041D05Rik
3.24418e-61	1.48533	0.529	0.122	1.64435e-56	Scn3a
3.64759e-61	2.83078	0.58	0.149	1.84882e-56	Cdh11
3.69046e-61	1.89081	0.443	0.082	1.87055e-56	Hecw1
8.37979e-61	1.37713	0.384	0.057	4.24738e-56	Mtus2
1.09973e-60	6.79813	0.835	0.442	5.57408e-56	Gpc6
1.21028e-60	7.82201	0.792	0.355	6.1344e-56	Mbd5
1.29109e-60	2.92972	0.498	0.11	6.544e-56	Plxna4
1.51186e-60	3.64769	0.678	0.23	7.66301e-56	Oxr1
2.17084e-60	2.56937	0.627	0.18	1.10031e-55	Kat6b
2.6253e-60	2.83033	0.816	0.39	1.33066e-55	Exoc4
4.44525e-60	2.70735	0.502	0.113	2.25312e-55	Gmds
7.08805e-60	1.67925	0.435	0.079	3.59265e-55	Upp2
7.78588e-60	7.38501	0.882	0.509	3.94635e-55	Ttc3
8.56994e-60	2.64544	0.455	0.09	4.34376e-55	Gm26691
1.21078e-59	2.21193	0.518	0.12	6.13696e-55	Bcl11a
1.25529e-59	1.29531	0.263	0.02	6.36256e-55	Nrg3os
1.46199e-59	2.36543	0.671	0.22	7.41024e-55	Rapgef6
1.72378e-59	5.02936	0.678	0.233	8.73715e-55	Atp2b2
2.28428e-59	3.32289	0.796	0.359	1.15781e-54	Akt3
2.35547e-59	0.833871	0.29	0.027	1.19389e-54	Adam12
2.73762e-59	2.97432	0.702	0.248	1.38759e-54	Mmp16
2.85723e-59	1.29162	0.247	0.017	1.44821e-54	Rapgef4os1
2.99681e-59	7.34576	0.984	0.778	1.51896e-54	Gabrb1
3.15667e-59	0.794133	0.275	0.023	1.59999e-54	Shank3
3.20518e-59	1.18547	0.384	0.059	1.62458e-54	Prkch
3.28899e-59	6.45321	0.914	0.626	1.66706e-54	Prkcb
5.42093e-59	5.43276	0.741	0.316	2.74765e-54	Ube3a
5.6943e-59	6.21867	0.459	0.092	2.88621e-54	Syt7
6.05961e-59	1.8977	0.412	0.07	3.07137e-54	2900055J20Rik
1.51748e-58	2.91442	0.537	0.139	7.69147e-54	Rit2
1.82885e-58	2.2606	0.506	0.119	9.26973e-54	Lmo3
1.86975e-58	0.780121	0.353	0.048	9.47699e-54	Slc24a4
2.28694e-58	1.95448	0.663	0.211	1.15916e-53	Rbfox2
2.46695e-58	1.64239	0.42	0.074	1.2504e-53	Nmnat2
2.519e-58	3.07623	0.635	0.2	1.27678e-53	Nalcn
2.77883e-58	4.39807	0.831	0.411	1.40848e-53	Kansl1
3.78389e-58	4.57364	0.773	0.329	1.9179e-53	Celf1
3.98311e-58	3.39748	0.659	0.223	2.01888e-53	Lncpint
5.18598e-58	2.82507	0.576	0.165	2.62857e-53	Npas2
6.06257e-58	5.5373	0.882	0.513	3.07287e-53	Rfx3
8.31329e-58	1.11759	0.286	0.028	4.21367e-53	Ano2
9.36024e-58	2.14416	0.553	0.148	4.74433e-53	Fnbp1l
1.16424e-57	-6.21657	0.996	0.912	5.90106e-53	Mir99ahg
1.54239e-57	8.87759	0.808	0.385	7.81774e-53	Rian
1.81037e-57	2.79519	0.596	0.176	9.17605e-53	Unc80
1.83846e-57	2.06859	0.761	0.311	9.31843e-53	Ubn2
1.97299e-57	1.42629	0.384	0.062	1.00003e-52	Ptprj
2.16475e-57	1.8803	0.282	0.027	1.09723e-52	Gm30382
3.00538e-57	2.71964	0.675	0.238	1.52331e-52	Dnajc1
3.55867e-57	1.5211	0.549	0.142	1.80375e-52	Stau2
3.70128e-57	2.57616	0.565	0.149	1.87603e-52	Csmd2
3.7092e-57	1.80141	0.533	0.134	1.88004e-52	Scn8a
8.94963e-57	4.68311	0.78	0.341	4.53621e-52	Nptn
1.06503e-56	1.53797	0.412	0.073	5.39823e-52	St6galnac3
1.15404e-56	1.6609	0.447	0.088	5.84937e-52	Fam184b
1.66026e-56	4.95166	0.616	0.197	8.41518e-52	Asap1
1.90087e-56	1.6792	0.392	0.066	9.63476e-52	Jazf1
1.91546e-56	0.833216	0.337	0.045	9.70871e-52	Gm44560
1.98701e-56	3.94892	0.816	0.457	1.00714e-51	Gpc5
2.19774e-56	5.69225	0.733	0.309	1.11395e-51	Ube2e2
2.49529e-56	2.48356	0.569	0.163	1.26476e-51	Tspan5
2.76818e-56	7.09638	0.831	0.468	1.40308e-51	Cadm1
6.70963e-56	9.01541	0.553	0.156	3.40084e-51	Pcdh15
8.88578e-56	0.969694	0.325	0.042	4.50384e-51	Mei4
1.03156e-55	0.9899	0.42	0.077	5.22856e-51	Kcnn3
1.31431e-55	2.03732	0.686	0.248	6.66171e-51	Nr3c2
1.43914e-55	1.50984	0.322	0.041	7.29443e-51	Gm38505
2.15804e-55	3.0194	0.514	0.126	1.09383e-50	Tln2
2.41698e-55	3.80083	0.706	0.278	1.22507e-50	Jmjd1c
2.5046e-55	1.5601	0.416	0.078	1.26948e-50	Sema3e
2.93842e-55	3.2275	0.565	0.162	1.48937e-50	Ptprm
5.69223e-55	2.52445	0.675	0.241	2.88516e-50	Prickle2
6.56923e-55	7.60794	0.773	0.37	3.32968e-50	Tmcc1
7.663e-55	2.0997	0.561	0.16	3.88407e-50	Nell2
8.59227e-55	1.19581	0.337	0.048	4.35508e-50	Atp8a2
1.96885e-54	2.45769	0.608	0.191	9.97931e-50	Faf1
3.52965e-54	2.50519	0.541	0.147	1.78904e-49	Ccnd2
4.56955e-54	1.9279	0.569	0.159	2.31612e-49	Jakmip1
4.70088e-54	1.72588	0.494	0.119	2.38269e-49	Fam110b
7.31132e-54	1.63022	0.396	0.071	3.70582e-49	Arhgap18
1.03803e-53	1.67977	0.447	0.096	5.26135e-49	Reep1
1.1502e-53	5.59931	0.733	0.315	5.82991e-49	Gng7
1.77121e-53	2.58244	0.49	0.119	8.97755e-49	Ric8b
2.60825e-53	1.14319	0.345	0.052	1.32202e-48	A330102I10Rik
3.20937e-53	2.39099	0.608	0.196	1.6267e-48	Tnrc6c
3.47186e-53	1.29181	0.365	0.06	1.75975e-48	Gm38251
3.87115e-53	9.06618	0.925	0.693	1.96213e-48	Rtn1
4.92708e-53	1.64141	0.588	0.175	2.49734e-48	Garem1
6.29308e-53	2.04039	0.749	0.314	3.18971e-48	Ncoa1
6.99734e-53	1.91137	0.612	0.191	3.54667e-48	Ankrd11
7.92325e-53	0.797899	0.271	0.028	4.01598e-48	Mlip
8.14158e-53	2.33064	0.522	0.135	4.12664e-48	Gulp1
1.15432e-52	3.11945	0.686	0.265	5.8508e-48	Srpk2
1.22195e-52	5.08327	0.631	0.211	6.19358e-48	Pi4ka
1.25073e-52	2.39966	0.624	0.211	6.33945e-48	Lrba
1.60184e-52	3.70457	0.694	0.266	8.11911e-48	Exoc6b
2.00665e-52	3.21323	0.616	0.199	1.01709e-47	Tmeff2
2.37663e-52	2.36329	0.561	0.164	1.20462e-47	Klhl2
2.82123e-52	1.02519	0.373	0.064	1.42997e-47	C78859
3.38286e-52	2.49638	0.62	0.206	1.71463e-47	Ubr5
6.88781e-52	6.04626	0.639	0.237	3.49115e-47	Homer1
7.58894e-52	5.57804	0.933	0.667	3.84653e-47	Gm20388
8.9357e-52	2.70608	0.663	0.241	4.52915e-47	Fut9
9.70531e-52	1.56316	0.569	0.167	4.91923e-47	Med12l
1.18495e-51	2.62206	0.565	0.172	6.00602e-47	Ptprg
1.26477e-51	1.80794	0.529	0.144	6.41063e-47	Gabra4
1.28798e-51	4.02265	0.514	0.133	6.52826e-47	Maml3
2.00452e-51	1.19771	0.451	0.099	1.01601e-46	Osbpl6
2.22796e-51	5.60449	1	0.989	1.12927e-46	Nrxn1
2.33878e-51	-6.48306	0.471	0.112	1.18543e-46	Cdh18
2.45641e-51	3.87726	0.624	0.22	1.24506e-46	Arhgef9
2.78796e-51	1.19919	0.4	0.077	1.4131e-46	Epb41l3
5.43037e-51	4.45666	0.533	0.147	2.75244e-46	Kcnh7
7.93156e-51	1.80963	0.627	0.216	4.02019e-46	Rasal2
8.27461e-51	1.77779	0.553	0.157	4.19407e-46	Fut8
1.00144e-50	3.13164	0.639	0.237	5.0759e-46	Srgap2
1.01109e-50	1.60767	0.467	0.111	5.12481e-46	Prkar2b
1.03625e-50	4.27733	0.78	0.383	5.25232e-46	Adcy5
1.15743e-50	2.61437	0.592	0.193	5.86655e-46	Tiam2
1.34576e-50	6.77702	0.839	0.482	6.8211e-46	Luc7l2
1.36576e-50	2.58334	0.612	0.203	6.92247e-46	Gm4258
2.18009e-50	2.05772	0.451	0.103	1.105e-45	Tmem57
3.92839e-50	2.94248	0.698	0.284	1.99114e-45	Gsk3b
5.88737e-50	2.11073	0.576	0.187	2.98407e-45	Lcor
6.82065e-50	2.07924	0.557	0.168	3.45711e-45	Csnk1g1
7.30938e-50	4.56024	0.89	0.58	3.70483e-45	Rbm39
1.03006e-49	1.79049	0.584	0.189	5.22096e-45	Dock7
1.13834e-49	2.20296	0.58	0.185	5.76978e-45	Ldb2
1.39057e-49	4.29274	0.655	0.249	7.04822e-45	Pam
1.88209e-49	1.90609	0.557	0.17	9.53955e-45	Epb41l1
2.04374e-49	3.51145	0.643	0.238	1.03589e-44	Birc6
2.25145e-49	1.04788	0.349	0.059	1.14117e-44	Gsg1l
2.38257e-49	2.79666	0.518	0.144	1.20763e-44	Ralyl
3.02009e-49	1.48528	0.427	0.092	1.53076e-44	Ndfip1
3.15876e-49	3.21536	0.592	0.196	1.60105e-44	Sez6
3.16547e-49	1.6576	0.569	0.173	1.60445e-44	Zfand3
3.22099e-49	2.327	0.631	0.22	1.63259e-44	Efna5
3.26073e-49	2.06008	0.643	0.241	1.65273e-44	Braf
3.34199e-49	2.01507	0.349	0.06	1.69392e-44	Cobl
4.74564e-49	0.677248	0.247	0.024	2.40537e-44	Pld5
6.37672e-49	3.51189	0.725	0.332	3.2321e-44	Zcchc7
6.74505e-49	0.811406	0.306	0.043	3.4188e-44	Kcnq1
7.23272e-49	1.0419	0.286	0.037	3.66598e-44	Car12
7.68498e-49	1.7682	0.733	0.309	3.89521e-44	Park2
7.82978e-49	3.05353	0.647	0.242	3.9686e-44	Klf12
8.21387e-49	5.28699	0.859	0.528	4.16328e-44	Snap25
8.95407e-49	0.643037	0.263	0.029	4.53846e-44	Slc7a8
1.00274e-48	1.17501	0.298	0.041	5.08251e-44	Grik3
1.0168e-48	1.50262	0.322	0.049	5.15376e-44	Ptprr
1.0493e-48	1.41608	0.541	0.157	5.31849e-44	Rapgef2
1.12461e-48	3.50911	0.62	0.216	5.70021e-44	Kcnk2
1.26036e-48	1.3519	0.361	0.065	6.38826e-44	Slc7a14
1.57045e-48	3.36377	0.545	0.164	7.95997e-44	A330076H08Rik
1.6443e-48	1.36333	0.404	0.083	8.33428e-44	Adcy9
1.85156e-48	2.97224	0.675	0.269	9.3848e-44	Abi2
2.66582e-48	1.23067	0.369	0.068	1.3512e-43	Sv2b
3.01342e-48	1.40307	0.404	0.085	1.52738e-43	Naa40
3.80888e-48	0.972728	0.384	0.074	1.93057e-43	Atxn7l1
4.09059e-48	0.984864	0.451	0.107	2.07336e-43	Phc2
4.31849e-48	1.07511	0.38	0.074	2.18887e-43	Lmtk2
6.4159e-48	1.60285	0.376	0.073	3.25196e-43	Cntn3
8.08845e-48	3.55661	0.725	0.331	4.09971e-43	Crebbp
8.84997e-48	1.31601	0.506	0.139	4.4857e-43	Nsd3
1.21305e-47	3.04162	0.467	0.119	6.14846e-43	Wipf3
1.38003e-47	1.37955	0.416	0.092	6.99481e-43	Pak7
2.57937e-47	0.784849	0.31	0.046	1.30738e-42	Acvr1
2.6486e-47	2.50139	0.663	0.256	1.34247e-42	Herc1
2.74382e-47	2.61467	0.525	0.153	1.39073e-42	Htr2c
4.05017e-47	4.0496	0.604	0.223	2.05287e-42	Synpr
5.06493e-47	3.19385	0.769	0.394	2.56721e-42	Ahi1
6.39676e-47	1.29898	0.412	0.091	3.24226e-42	Amph
7.22798e-47	2.27907	0.514	0.148	3.66357e-42	Kcnip2
7.95235e-47	14.8509	0.969	0.831	4.03073e-42	Son
8.71957e-47	3.08664	0.686	0.286	4.4196e-42	Atp8a1
8.98985e-47	1.43508	0.529	0.154	4.55659e-42	Slmap
1.10976e-46	0.843039	0.255	0.029	5.62491e-42	A230103L15Rik
1.20887e-46	1.90858	0.482	0.132	6.12729e-42	Dfna5
1.2324e-46	11.0806	0.71	0.325	6.24653e-42	Baiap2
1.32246e-46	-2.3482	0.459	0.117	6.703e-42	Brinp3
1.56325e-46	-7.0559	0.773	0.388	7.92347e-42	Trpm3
1.90517e-46	1.6954	0.514	0.147	9.65654e-42	Elp4
2.05071e-46	1.49667	0.463	0.117	1.03943e-41	Zfp704
2.3517e-46	1.09876	0.424	0.096	1.19198e-41	Ctdspl
2.36401e-46	2.7621	0.561	0.177	1.19822e-41	9930021J03Rik
2.43684e-46	0.944549	0.306	0.047	1.23514e-41	Traip
2.5495e-46	11.3548	0.925	0.7	1.29224e-41	Tcf4
3.06453e-46	3.97089	0.435	0.107	1.55329e-41	Eefsec
3.55306e-46	2.56009	0.553	0.175	1.8009e-41	Limch1
3.71334e-46	3.74228	0.694	0.294	1.88214e-41	Bcl11b
4.0618e-46	1.97561	0.592	0.211	2.05876e-41	Akap8l
4.22494e-46	3.38192	0.639	0.244	2.14146e-41	Ptk2
5.26482e-46	1.55622	0.514	0.152	2.66853e-41	Ankrd28
5.73668e-46	0.547726	0.208	0.017	2.90769e-41	Trpc7
5.75165e-46	1.05745	0.278	0.037	2.91528e-41	Sema3a
6.57544e-46	4.37598	0.835	0.485	3.33283e-41	4930402H24Rik
7.53922e-46	1.03479	0.306	0.047	3.82133e-41	Man2a1
7.60699e-46	2.77727	0.537	0.167	3.85568e-41	Mcu
8.31898e-46	2.12916	0.616	0.227	4.21656e-41	Fto
9.39574e-46	0.915135	0.298	0.045	4.76233e-41	Rassf8
9.83186e-46	0.572779	0.224	0.021	4.98338e-41	Mme
1.27938e-45	2.17483	0.522	0.158	6.48467e-41	Trio
1.35116e-45	2.17887	0.529	0.164	6.84847e-41	Cask
2.30107e-45	4.28164	0.639	0.247	1.16632e-40	Ext1
2.84649e-45	2.26645	0.6	0.213	1.44277e-40	Zfp609
3.0087e-45	1.83961	0.537	0.175	1.52499e-40	Rfx7
3.29652e-45	2.68632	0.659	0.273	1.67087e-40	Rbm6
3.53846e-45	2.12042	0.459	0.12	1.79351e-40	Slc24a3
4.90509e-45	6.47516	0.851	0.521	2.4862e-40	Dennd1a
5.19889e-45	3.37213	0.631	0.245	2.63511e-40	Scaper
5.30647e-45	3.13342	0.655	0.268	2.68964e-40	Prkd1
5.96561e-45	1.5204	0.388	0.084	3.02373e-40	Dync1i1
6.29029e-45	1.74757	0.369	0.075	3.1883e-40	Wbscr17
7.35609e-45	2.66438	0.678	0.284	3.72851e-40	Rabgap1l
8.12128e-45	1.73696	0.486	0.136	4.11635e-40	Pkia
8.60902e-45	2.66002	0.671	0.288	4.36357e-40	Myo9a
9.37906e-45	3.87867	0.816	0.48	4.75387e-40	App
9.4078e-45	1.59002	0.553	0.18	4.76844e-40	Krit1
9.71333e-45	0.958837	0.341	0.063	4.9233e-40	Tbc1d8
1.09806e-44	1.67663	0.655	0.259	5.56562e-40	Immp2l
1.17528e-44	2.95131	0.529	0.169	5.95701e-40	Utrn
1.26019e-44	1.13677	0.431	0.105	6.38741e-40	Fndc3b
1.51314e-44	3.34046	0.631	0.247	7.66951e-40	Akap9
1.53014e-44	1.94307	0.478	0.136	7.75566e-40	Tenm1
1.63416e-44	1.41637	0.365	0.074	8.28289e-40	Rapgef5
1.79337e-44	1.05403	0.369	0.074	9.08985e-40	Gm42722
1.86283e-44	0.849183	0.29	0.043	9.44192e-40	Kif17
2.1187e-44	1.09395	0.424	0.1	1.07388e-39	Gm15478
2.20388e-44	1.2469	0.4	0.09	1.11706e-39	Trim46
2.63003e-44	2.58228	0.49	0.139	1.33306e-39	Tacc1
2.67269e-44	1.72987	0.275	0.038	1.35468e-39	Cdh9
2.79781e-44	1.71285	0.525	0.161	1.4181e-39	Rasgef1a
4.08691e-44	3.33483	0.702	0.304	2.07149e-39	Cdc42bpa
4.14805e-44	-3.46848	0.651	0.271	2.10248e-39	Mark3
4.1535e-44	1.38341	0.463	0.123	2.10525e-39	Afdn
5.51567e-44	4.18373	0.737	0.355	2.79567e-39	Nsg2
5.52429e-44	0.926819	0.302	0.049	2.80004e-39	Tmem117
5.73198e-44	2.28783	0.647	0.256	2.90531e-39	Ankrd17
6.84124e-44	7.44993	0.827	0.538	3.46755e-39	Ogt
7.48307e-44	0.946604	0.322	0.057	3.79287e-39	Uvrag
7.669e-44	1.21971	0.392	0.085	3.88711e-39	Ccdc85a
1.42379e-43	2.26183	0.424	0.105	7.21661e-39	Gpr137c
1.59742e-43	2.77584	0.549	0.18	8.09666e-39	Matk
1.60491e-43	1.00172	0.435	0.108	8.13466e-39	Slc8a1
1.76254e-43	1.68747	0.494	0.147	8.93361e-39	R3hdm2
1.92064e-43	2.63155	0.541	0.18	9.73498e-39	Ppp1r12b
1.92904e-43	1.20427	0.412	0.098	9.77755e-39	Eps15l1
2.22915e-43	2.71902	0.706	0.319	1.12986e-38	Atrx
2.53266e-43	2.65261	0.647	0.253	1.28371e-38	Psme4
2.96468e-43	1.89763	0.561	0.192	1.50268e-38	Adam22
2.9946e-43	1.51837	0.447	0.118	1.51784e-38	C2cd5
3.23625e-43	0.645454	0.22	0.022	1.64032e-38	Mtmr7
6.84951e-43	2.94867	0.596	0.228	3.47174e-38	Scn2a
7.16692e-43	2.61738	0.627	0.257	3.63262e-38	Cdk17
7.22262e-43	1.27698	0.435	0.113	3.66086e-38	Shank2
7.35721e-43	2.05271	0.522	0.164	3.72908e-38	Tox3
8.39532e-43	1.27839	0.435	0.113	4.25525e-38	Mtf2
1.01245e-42	1.15768	0.408	0.097	5.13168e-38	Nxpe4
1.20456e-42	0.886564	0.294	0.047	6.10545e-38	Nup93
1.26092e-42	2.35886	0.592	0.223	6.39109e-38	Gm26733
1.26989e-42	1.06529	0.373	0.08	6.43659e-38	Plppr5
2.26033e-42	1.15432	0.451	0.122	1.14567e-37	Mkl1
2.41033e-42	2.60305	0.58	0.211	1.2217e-37	Fbxo11
2.69574e-42	1.46068	0.596	0.221	1.36636e-37	Syn2
3.39243e-42	4.51269	0.631	0.256	1.71949e-37	Dst
3.53099e-42	6.36853	0.839	0.513	1.78972e-37	Gm3764
3.60032e-42	-5.97263	0.573	0.874	1.82486e-37	mt-Nd4
4.76369e-42	1.11729	0.412	0.099	2.41453e-37	Gab2
5.04403e-42	1.68527	0.518	0.167	2.55662e-37	Acap2
5.07699e-42	1.13578	0.369	0.08	2.57332e-37	Nos1ap
5.53695e-42	3.03168	0.6	0.238	2.80646e-37	Rap1gap
5.65751e-42	3.63343	0.318	0.057	2.86757e-37	Mir124a-1hg
6.00724e-42	1.88947	0.651	0.282	3.04483e-37	Ncor1
6.92064e-42	0.658225	0.271	0.039	3.5078e-37	Dcx
6.92142e-42	1.09813	0.412	0.101	3.50819e-37	Rab3c
8.60308e-42	1.55543	0.557	0.189	4.36056e-37	Aak1
8.94661e-42	1.25161	0.384	0.089	4.53468e-37	Rab40c
9.20882e-42	2.90714	0.678	0.309	4.66758e-37	Nsd1
9.78684e-42	3.09488	0.729	0.355	4.96056e-37	Ttc14
1.02745e-41	1.54435	0.498	0.153	5.20774e-37	Atp9b
1.14941e-41	2.67548	0.592	0.225	5.82591e-37	Pum1
1.34224e-41	0.876622	0.361	0.077	6.8033e-37	Fam19a2
1.44321e-41	2.67346	0.565	0.204	7.31506e-37	4932438A13Rik
1.66877e-41	1.29834	0.424	0.108	8.45831e-37	Ino80
1.7737e-41	1.06246	0.31	0.055	8.99016e-37	Mirg
1.89192e-41	1.42523	0.635	0.267	9.58941e-37	Pde4d
1.93266e-41	1.85847	0.373	0.083	9.79588e-37	Tmem181b-ps
1.99582e-41	2.00494	0.553	0.197	1.0116e-36	Camta1
2.33213e-41	0.749351	0.227	0.026	1.18207e-36	Htr1f
2.52893e-41	1.1302	0.416	0.104	1.28182e-36	Add2
2.59561e-41	0.972271	0.212	0.021	1.31561e-36	Thsd4
3.45848e-41	0.959568	0.341	0.068	1.75297e-36	Ccdc88c
3.67016e-41	1.3509	0.51	0.162	1.86026e-36	Igf2bp3
3.72252e-41	0.296868	0.318	0.058	1.88679e-36	Prkag2
3.81337e-41	1.97078	0.569	0.204	1.93285e-36	Nsf
3.84653e-41	0.817891	0.247	0.033	1.94965e-36	9630028H03Rik
3.92749e-41	0.786789	0.255	0.035	1.99069e-36	Gpr149
3.9567e-41	1.25416	0.518	0.168	2.0055e-36	Dcaf6
4.29817e-41	3.01988	0.569	0.211	2.17857e-36	Tmem191c
4.40418e-41	0.608566	0.188	0.015	2.2323e-36	Epha10
4.45208e-41	2.32739	0.557	0.199	2.25658e-36	A330023F24Rik
4.68902e-41	2.06493	0.596	0.229	2.37668e-36	Rnf121
5.00375e-41	2.19124	0.678	0.298	2.5362e-36	Rgs6
7.49155e-41	0.71196	0.247	0.033	3.79716e-36	Slc35f4
7.5341e-41	0.74082	0.275	0.042	3.81873e-36	Cenpp
7.54611e-41	1.45625	0.494	0.151	3.82482e-36	Gtdc1
8.77264e-41	1.19142	0.502	0.157	4.4465e-36	Cdkal1
8.77518e-41	0.827913	0.263	0.038	4.44779e-36	Rimbp2
9.44162e-41	1.46036	0.475	0.139	4.78558e-36	E130307A14Rik
9.58675e-41	1.24963	0.329	0.064	4.85914e-36	Ano6
1.29802e-40	1.82607	0.596	0.226	6.57914e-36	Smg6
1.37285e-40	1.31878	0.482	0.145	6.95844e-36	Iqsec1
1.4723e-40	0.659083	0.196	0.018	7.4625e-36	Bmp6
1.52818e-40	1.61097	0.553	0.201	7.74573e-36	Abat
1.53101e-40	1.11964	0.38	0.089	7.76007e-36	Fam214a
1.66144e-40	0.48149	0.196	0.018	8.42119e-36	Gm20642
1.85743e-40	1.78194	0.396	0.097	9.41458e-36	Necab1
1.90066e-40	0.936522	0.376	0.085	9.63368e-36	Pknox2
1.91608e-40	2.01827	0.514	0.164	9.71187e-36	Wwc1
2.16435e-40	1.28583	0.427	0.114	1.09702e-35	Slc4a10
2.176e-40	0.658478	0.271	0.041	1.10293e-35	Fam78b
2.52905e-40	0.601321	0.243	0.032	1.28187e-35	Thsd7b
2.79427e-40	1.74692	0.404	0.103	1.4163e-35	Chst11
2.85494e-40	1.90896	0.6	0.239	1.44705e-35	N4bp2l2
2.89569e-40	2.60336	0.698	0.331	1.46771e-35	Chd9
3.40246e-40	3.47382	0.71	0.356	1.72457e-35	Mapt
3.79347e-40	0.860039	0.224	0.026	1.92276e-35	Gm45159
3.87973e-40	2.08798	0.592	0.225	1.96648e-35	Arid1b
4.10807e-40	0.747894	0.255	0.036	2.08221e-35	Rap1gap2
4.90174e-40	0.417334	0.157	0.009	2.48449e-35	Phex
5.11054e-40	1.86149	0.592	0.226	2.59033e-35	Bicd1
5.32373e-40	1.82873	0.471	0.142	2.69838e-35	Vps13a
5.37959e-40	0.479986	0.173	0.013	2.7267e-35	Clmp
5.44386e-40	0.606991	0.275	0.043	2.75928e-35	Exoc6
5.76218e-40	2.40296	0.541	0.186	2.92062e-35	Rps6ka5
6.01032e-40	1.08935	0.396	0.098	3.04639e-35	Map3k3
6.06992e-40	0.566	0.231	0.029	3.0766e-35	Ppargc1b
6.17193e-40	3.75738	0.898	0.688	3.1283e-35	Gpm6a
6.53014e-40	1.28916	0.349	0.075	3.30987e-35	Pax6
6.61696e-40	1.17812	0.318	0.061	3.35387e-35	Ppp4r4
7.40257e-40	3.22338	0.722	0.356	3.75207e-35	Ash1l
7.92509e-40	1.1547	0.455	0.13	4.01691e-35	Rap1gds1
9.18545e-40	0.847883	0.353	0.077	4.65574e-35	Gm37240
1.04771e-39	1.71544	0.584	0.222	5.31044e-35	Phf14
1.3165e-39	0.425487	0.184	0.015	6.67281e-35	Dgkg
1.38642e-39	1.44431	0.604	0.237	7.02723e-35	Fam168a
1.69869e-39	0.901403	0.31	0.058	8.60996e-35	Ptpro
2.01771e-39	1.23701	0.424	0.113	1.02269e-34	Pibf1
2.06232e-39	1.39306	0.431	0.12	1.04531e-34	Wdr7
2.13036e-39	0.563857	0.239	0.032	1.07979e-34	Slc9a7
2.33807e-39	1.74161	0.537	0.188	1.18508e-34	Mbnl1
2.36861e-39	1.35626	0.459	0.138	1.20056e-34	Micu1
2.41286e-39	0.953292	0.341	0.073	1.22298e-34	Alkbh1
2.48506e-39	2.65589	0.671	0.301	1.25958e-34	Erbb4
2.58488e-39	1.8548	0.498	0.153	1.31017e-34	Prr16
2.63471e-39	3.8806	0.714	0.376	1.33543e-34	Mycbp2
2.73242e-39	0.538624	0.192	0.018	1.38495e-34	Gm15414
2.79379e-39	1.63586	0.475	0.147	1.41606e-34	Prkcz
3.05734e-39	1.23694	0.31	0.058	1.54964e-34	Pde4a
3.10327e-39	2.05849	0.482	0.149	1.57293e-34	Zfyve9
3.49156e-39	1.21746	0.333	0.068	1.76973e-34	Cacng4
3.65249e-39	1.63403	0.412	0.108	1.8513e-34	Zfp532
3.74347e-39	1.84837	0.6	0.237	1.89742e-34	Pcm1
3.99968e-39	0.888043	0.408	0.104	2.02728e-34	Ttc17
4.82232e-39	2.58409	0.663	0.314	2.44424e-34	Map1b
5.59571e-39	1.09292	0.302	0.055	2.83624e-34	Slc16a7
5.61802e-39	3.18704	0.678	0.301	2.84755e-34	Fgf13
5.87058e-39	2.34277	0.494	0.158	2.97556e-34	Ahcyl2
6.17088e-39	2.00875	0.447	0.129	3.12777e-34	Pacs1
7.92469e-39	1.71936	0.337	0.072	4.01671e-34	Tgfa
8.3344e-39	1.3083	0.333	0.069	4.22438e-34	D930015E06Rik
9.21992e-39	1.99656	0.667	0.307	4.67321e-34	Usp34
9.82247e-39	2.06366	0.631	0.272	4.97862e-34	Fam172a
1.1935e-38	0.645381	0.255	0.038	6.04938e-34	A330015K06Rik
1.44658e-38	1.28248	0.388	0.096	7.33215e-34	Clec16a
1.45643e-38	2.34879	0.604	0.235	7.38205e-34	Tmtc2
1.50281e-38	0.761059	0.373	0.088	7.61714e-34	Ctdspl2
1.80259e-38	1.28996	0.455	0.134	9.13659e-34	Man1a2
1.9687e-38	1.56939	0.498	0.166	9.97856e-34	Mark2
2.14214e-38	1.03768	0.404	0.102	1.08577e-33	Rnf169
2.3352e-38	5.53649	0.925	0.704	1.18362e-33	Rgs20
2.74142e-38	2.43508	0.678	0.329	1.38951e-33	Fchsd2
2.76394e-38	2.90331	0.71	0.359	1.40093e-33	Ccdc88a
2.99614e-38	1.21155	0.337	0.073	1.51863e-33	Ntng1
3.18354e-38	2.55357	0.557	0.206	1.61361e-33	Trip12
3.32813e-38	1.45755	0.533	0.184	1.6869e-33	Gm42439
3.35677e-38	1.15478	0.729	0.351	1.70141e-33	Fhit
3.47739e-38	1.33149	0.271	0.045	1.76255e-33	Dscam
3.90315e-38	1.1787	0.278	0.048	1.97835e-33	Fig4
4.66275e-38	0.625467	0.239	0.033	2.36336e-33	Pcnx2
4.68471e-38	1.06205	0.424	0.116	2.37449e-33	Arhgap20
4.8095e-38	0.820006	0.271	0.045	2.43774e-33	Itga9
4.87821e-38	-1.94519	0.894	0.647	2.47257e-33	2610203C20Rik
5.13165e-38	3.56699	0.749	0.368	2.60103e-33	Srrm2
6.53327e-38	1.68659	0.443	0.129	3.31145e-33	Pkp4
6.57338e-38	2.53766	0.584	0.228	3.33178e-33	Snca
7.09202e-38	0.529581	0.196	0.02	3.59466e-33	Gm45179
7.48361e-38	3.40384	0.773	0.442	3.79314e-33	Zeb2
8.61679e-38	0.78809	0.376	0.091	4.36751e-33	Raph1
8.72708e-38	4.28442	0.776	0.471	4.42341e-33	Clasp2
9.25789e-38	-11.8988	0.69	0.91	4.69245e-33	mt-Nd1
9.28592e-38	1.48006	0.506	0.169	4.70666e-33	Ascc3
1.03516e-37	1.28767	0.529	0.187	5.24683e-33	Cyld
1.15247e-37	3.00384	0.91	0.651	5.8414e-33	Sik3
1.26142e-37	0.67109	0.361	0.083	6.39361e-33	Rab40b
1.40819e-37	1.21124	0.494	0.162	7.13756e-33	Ftx
1.47171e-37	1.88307	0.627	0.254	7.45948e-33	Foxo1
1.51007e-37	1.02457	0.263	0.043	7.65396e-33	4933406I18Rik
1.52252e-37	2.56662	0.392	0.102	7.71705e-33	Unc5d
1.63863e-37	1.71918	0.416	0.116	8.30558e-33	Dock10
1.64011e-37	1.13722	0.365	0.088	8.31308e-33	Lrrk2
1.86212e-37	1.66784	0.565	0.22	9.43835e-33	Ppp1r12a
2.17389e-37	1.64391	0.533	0.194	1.10186e-32	Srsf11
2.29596e-37	0.726	0.298	0.057	1.16373e-32	Lrch1
2.30603e-37	1.20689	0.361	0.085	1.16883e-32	Ulk4
2.42318e-37	1.53872	0.537	0.2	1.22821e-32	Glg1
2.67855e-37	2.83975	0.663	0.318	1.35765e-32	Ralgapa1
2.75114e-37	0.697689	0.255	0.04	1.39445e-32	Kcnt2
2.78473e-37	3.303	0.663	0.305	1.41147e-32	Gnaq
2.81815e-37	1.02736	0.357	0.085	1.42841e-32	Spred2
2.83777e-37	1.88833	0.647	0.294	1.43835e-32	Csnk1a1
2.93438e-37	1.71985	0.451	0.135	1.48732e-32	Numb
3.11635e-37	1.31491	0.549	0.201	1.57955e-32	Ehmt1
4.01001e-37	1.91343	0.529	0.186	2.03251e-32	Ube3c
4.20498e-37	0.569033	0.282	0.05	2.13133e-32	Actl6b
4.83367e-37	0.750489	0.286	0.052	2.44999e-32	RP23-361B11.3
5.16308e-37	0.729279	0.263	0.043	2.61696e-32	Dchs2
5.38816e-37	2.57054	0.549	0.218	2.73104e-32	Ptprn
6.44712e-37	1.60862	0.561	0.216	3.26779e-32	Rabgap1
7.09758e-37	1.04768	0.349	0.08	3.59748e-32	2610037D02Rik
8.68489e-37	1.57689	0.533	0.194	4.40202e-32	Ccnt2
9.19551e-37	0.856522	0.302	0.06	4.66083e-32	Syt14
9.95913e-37	1.81336	0.404	0.11	5.04788e-32	Mtcl1
1.06177e-36	5.68329	0.604	0.256	5.38168e-32	Ambra1
1.10947e-36	1.09202	0.42	0.116	5.62346e-32	Zfp407
1.25927e-36	1.89584	0.518	0.182	6.38271e-32	Gls
1.42176e-36	0.920662	0.306	0.061	7.20635e-32	Gm28376
1.49485e-36	0.428659	0.125	0.005	7.57682e-32	Gm15680
1.61109e-36	2.05535	0.616	0.258	8.16595e-32	Phip
1.85271e-36	1.11707	0.384	0.1	9.39065e-32	Dph6
1.89363e-36	1.40212	0.353	0.085	9.59805e-32	Zc3h12c
1.90619e-36	5.48645	0.867	0.627	9.66173e-32	Trps1
2.03515e-36	1.69718	0.506	0.176	1.03153e-31	AI314180
2.19513e-36	1.23654	0.435	0.13	1.11262e-31	Polb
2.29771e-36	3.25522	0.659	0.298	1.16462e-31	Nf1
2.4064e-36	1.19262	0.494	0.165	1.21971e-31	Bbs9
2.41282e-36	2.59514	0.514	0.184	1.22296e-31	Rock2
2.48538e-36	1.04336	0.451	0.136	1.25974e-31	Dis3l2
2.48606e-36	0.759661	0.298	0.058	1.26009e-31	Ccdc148
4.0196e-36	1.24718	0.329	0.074	2.03737e-31	Sema3c
4.15239e-36	6.67369	0.71	0.379	2.10468e-31	Chn1
4.49952e-36	0.870119	0.369	0.093	2.28063e-31	Ranbp17
4.66991e-36	0.975024	0.286	0.054	2.36699e-31	Dtnbos
5.31727e-36	0.842232	0.329	0.073	2.69511e-31	Shc3
5.73694e-36	1.74309	0.584	0.226	2.90783e-31	Arih1
7.15898e-36	4.39268	0.651	0.301	3.6286e-31	Btbd9
7.58495e-36	0.672889	0.239	0.036	3.84451e-31	Klhl3
8.06817e-36	1.34773	0.396	0.108	4.08943e-31	Stim2
8.44011e-36	1.14825	0.282	0.053	4.27796e-31	Col25a1
8.99361e-36	0.425442	0.165	0.014	4.5585e-31	Trpc4
9.90261e-36	0.771979	0.306	0.063	5.01924e-31	A230057D06Rik.2
1.02467e-35	1.49378	0.42	0.122	5.19364e-31	Nfasc
1.09213e-35	1.47383	0.518	0.19	5.53559e-31	Cog5
1.14042e-35	2.73153	0.624	0.286	5.78033e-31	Cdh10
1.17486e-35	0.650655	0.188	0.02	5.95492e-31	Rerg
1.38222e-35	1.30989	0.408	0.116	7.00593e-31	Stim1
1.38305e-35	1.1338	0.286	0.055	7.01015e-31	Nell1
1.59032e-35	0.492979	0.224	0.031	8.06072e-31	A330008L17Rik
1.86732e-35	1.32078	0.478	0.164	9.46471e-31	Ptk2b
1.90584e-35	0.683078	0.325	0.071	9.65992e-31	Sgk3
2.04114e-35	1.63621	0.529	0.199	1.03457e-30	Inf2
2.18326e-35	1.60588	0.361	0.092	1.10661e-30	Zswim5
2.19699e-35	0.729616	0.749	0.434	1.11357e-30	Phf21a
2.26148e-35	0.980584	0.353	0.085	1.14625e-30	Fstl5
2.26773e-35	0.91949	0.278	0.052	1.14942e-30	Ptchd4
2.38794e-35	1.4189	0.459	0.146	1.21035e-30	Dennd5b
2.44614e-35	3.39546	0.851	0.587	1.23985e-30	Nfib
2.46738e-35	1.08763	0.486	0.162	1.25062e-30	Sesn1
2.51244e-35	1.20674	0.51	0.175	1.27345e-30	Xrcc4
2.63363e-35	0.756897	0.333	0.076	1.33488e-30	Rars2
2.91803e-35	2.00775	0.576	0.236	1.47903e-30	Myo5a
3.09582e-35	3.37304	0.757	0.426	1.56915e-30	Fus
3.33132e-35	1.05323	0.416	0.12	1.68851e-30	Pdss2
3.46803e-35	1.98351	0.616	0.27	1.7578e-30	Kmt2e
4.15427e-35	1.34863	0.471	0.154	2.10563e-30	Hnrnph3
4.23153e-35	0.977263	0.337	0.077	2.14479e-30	Sox8
4.23275e-35	0.759453	0.278	0.052	2.14541e-30	Sdk2
4.3565e-35	0.840522	0.282	0.054	2.20813e-30	Ppm1h
4.40532e-35	0.714734	0.196	0.023	2.23288e-30	Runx2
5.95828e-35	1.11273	0.396	0.11	3.02001e-30	Pcnx
5.9892e-35	1.69883	0.494	0.173	3.03569e-30	Ago3
6.45864e-35	1.97638	0.604	0.256	3.27363e-30	Mbtd1
7.16468e-35	-7.45297	0.773	0.923	3.63149e-30	mt-Cytb
7.49133e-35	0.887683	0.318	0.069	3.79706e-30	Gm44151
7.50758e-35	1.28119	0.373	0.096	3.80529e-30	Gprasp1
7.82826e-35	1.04228	0.361	0.091	3.96783e-30	Map7
9.38184e-35	1.15307	0.443	0.141	4.75528e-30	Dlgap3
9.71901e-35	1.85533	0.588	0.263	4.92618e-30	Arhgap32
1.05154e-34	0.794824	0.357	0.089	5.32982e-30	Snx25
1.11709e-34	0.470699	0.263	0.046	5.66211e-30	Nphp4
1.17401e-34	0.692106	0.259	0.045	5.95061e-30	Arhgef3
1.23892e-34	1.7005	0.541	0.213	6.27959e-30	Eif4g3
1.37109e-34	0.844523	0.337	0.08	6.94949e-30	Anks1
1.46174e-34	2.04513	0.576	0.228	7.40899e-30	Xpr1
1.64812e-34	1.10391	0.318	0.071	8.35366e-30	Gm17750
1.79902e-34	7.90605	0.965	0.865	9.11853e-30	Pbx1
2.02054e-34	0.738611	0.278	0.053	1.02413e-29	Gm45881
2.35057e-34	0.605103	0.2	0.025	1.19141e-29	Glt1d1
2.415e-34	1.40361	0.475	0.16	1.22407e-29	Gramd1b
2.58003e-34	0.526627	0.216	0.03	1.30772e-29	Hdx
2.75274e-34	0.716214	0.243	0.04	1.39525e-29	Gm16541
2.8311e-34	1.42116	0.361	0.093	1.43497e-29	Rab11fip3
3.02075e-34	1.89926	0.557	0.219	1.5311e-29	Cux1
3.10704e-34	0.613845	0.263	0.047	1.57484e-29	Brinp2
3.18933e-34	0.484521	0.165	0.015	1.61654e-29	Gm13268
3.75018e-34	0.978501	0.337	0.08	1.90082e-29	Ezh2
4.04309e-34	0.64819	0.216	0.03	2.04928e-29	Kcnh4
4.13275e-34	0.756664	0.322	0.073	2.09473e-29	Rps6ka2
4.21655e-34	0.579845	0.263	0.047	2.1372e-29	Mphosph9
4.8078e-34	1.68722	0.443	0.14	2.43688e-29	Klhl7
4.99693e-34	1.13558	0.49	0.173	2.53274e-29	Gpcpd1
5.20779e-34	0.974592	0.384	0.106	2.63962e-29	Pdzd4
5.4191e-34	2.232	0.569	0.241	2.74672e-29	Rabep1
5.93272e-34	3.43687	0.565	0.231	3.00706e-29	Dleu2
6.08999e-34	2.05655	0.624	0.288	3.08677e-29	Sltm
6.53911e-34	1.61786	0.424	0.13	3.31441e-29	Dnm2
6.57045e-34	3.35266	0.753	0.447	3.3303e-29	Wdr17
6.82198e-34	0.938122	0.216	0.03	3.45779e-29	Top2a
6.8673e-34	2.7188	0.329	0.079	3.48076e-29	Kitl
7.11955e-34	2.62052	0.498	0.183	3.60862e-29	Astn2
7.23949e-34	1.17644	0.4	0.114	3.66941e-29	9130011E15Rik
7.26999e-34	3.29034	0.631	0.297	3.68487e-29	Bcas3
8.62266e-34	1.11443	0.408	0.12	4.37048e-29	Ophn1
8.62549e-34	1.11402	0.384	0.108	4.37192e-29	Specc1
8.91925e-34	1.83823	0.529	0.208	4.52081e-29	Pcmtd1
9.02223e-34	0.959917	0.361	0.094	4.57301e-29	Shtn1
9.17742e-34	0.958558	0.365	0.096	4.65167e-29	Snx29
9.38056e-34	1.711	0.573	0.225	4.75463e-29	Tbl1x
9.90567e-34	2.98627	0.592	0.254	5.02079e-29	Mapk4
1.04437e-33	0.860964	0.31	0.068	5.29348e-29	Rnf214
1.08152e-33	1.15933	0.455	0.149	5.4818e-29	Rabl6
1.08684e-33	1.92689	0.486	0.173	5.50874e-29	Dhx30
1.20322e-33	2.51738	0.482	0.172	6.09863e-29	Dip2b
1.20961e-33	0.54081	0.286	0.057	6.13104e-29	9330182L06Rik
1.31792e-33	1.2408	0.404	0.117	6.68e-29	Iqsec2
1.36722e-33	0.611733	0.271	0.051	6.92988e-29	Med27
1.73588e-33	1.22829	0.333	0.08	8.79847e-29	Svop
1.7922e-33	0.492727	0.243	0.041	9.08396e-29	Rab27b
1.94387e-33	1.31609	0.431	0.135	9.85272e-29	Znrf1
1.99521e-33	2.025	0.537	0.21	1.01129e-28	Dmxl1
2.07528e-33	0.476389	0.169	0.017	1.05188e-28	Stk26
2.19859e-33	1.41657	0.439	0.142	1.11438e-28	Ube2g1
2.32793e-33	0.577794	0.196	0.025	1.17994e-28	Ptchd1
2.35352e-33	0.775048	0.404	0.117	1.19291e-28	Cnot2
2.36554e-33	3.09945	0.682	0.346	1.199e-28	Sybu
2.71338e-33	0.864444	0.231	0.037	1.3753e-28	Pvt1
2.97966e-33	2.30215	0.584	0.256	1.51027e-28	Tle4
3.03459e-33	0.525521	0.173	0.018	1.53811e-28	Gm11418
3.05457e-33	1.27143	0.482	0.166	1.54824e-28	Tial1
3.09825e-33	2.31328	0.553	0.223	1.57038e-28	Itfg1
3.31646e-33	1.899	0.463	0.158	1.68098e-28	Rmdn1
3.43843e-33	1.09792	0.42	0.129	1.7428e-28	Gm15800
3.59596e-33	0.325371	0.125	0.007	1.82265e-28	Oprd1
3.63872e-33	1.11637	0.404	0.119	1.84432e-28	Fyn
3.70585e-33	1.48947	0.529	0.204	1.87835e-28	Tusc3
3.78532e-33	1.12816	0.443	0.142	1.91863e-28	Far1
3.964e-33	1.82424	0.467	0.158	2.00919e-28	Carmil1
4.40773e-33	1.13284	0.373	0.102	2.2341e-28	Pola1
5.33566e-33	1.83832	0.651	0.317	2.70443e-28	Zfr
5.65273e-33	0.994252	0.329	0.08	2.86514e-28	Sgms1
5.95998e-33	0.319455	0.133	0.008	3.02087e-28	RP23-132J19.1
6.31726e-33	2.61726	0.643	0.319	3.20197e-28	Mef2c
6.82534e-33	1.02823	0.424	0.132	3.45949e-28	Nr6a1
7.5923e-33	2.1378	0.561	0.236	3.84823e-28	Ptpn4
7.78152e-33	0.739471	0.306	0.068	3.94414e-28	Arhgap44
7.8502e-33	1.11968	0.463	0.157	3.97895e-28	Xpo7
8.41101e-33	1.06462	0.396	0.116	4.26321e-28	Apba1
8.90868e-33	0.968018	0.424	0.132	4.51545e-28	Map2k4
9.46487e-33	1.64879	0.565	0.244	4.79736e-28	Slc22a23
9.48733e-33	0.834158	0.282	0.058	4.80875e-28	Gm37899
1.15649e-32	0.9484	0.455	0.146	5.8618e-28	Trim44
1.1581e-32	1.30755	0.443	0.145	5.86995e-28	4632427E13Rik
1.20852e-32	1.59009	0.494	0.18	6.12551e-28	Usp32
1.22101e-32	1.00396	0.388	0.111	6.18881e-28	Hace1
1.27776e-32	1.48541	0.447	0.152	6.47645e-28	Pten
1.35173e-32	5.40281	0.639	0.323	6.85138e-28	Astn1
1.3916e-32	1.48964	0.459	0.157	7.05347e-28	Brd4
1.44924e-32	1.74838	0.573	0.239	7.34561e-28	Zfp638
1.45892e-32	0.420264	0.173	0.018	7.39469e-28	Jakmip3
1.48364e-32	0.553879	0.29	0.061	7.51999e-28	Adarb1
1.61638e-32	0.965852	0.4	0.117	8.1928e-28	Zzef1
1.61892e-32	0.798328	0.384	0.108	8.20565e-28	Snd1
1.76348e-32	0.809343	0.29	0.062	8.93836e-28	Pex5l
1.8205e-32	0.569427	0.161	0.015	9.2274e-28	Pcsk2os1
1.82262e-32	1.0024	0.298	0.066	9.23816e-28	Apex2
2.1892e-32	3.69424	0.592	0.265	1.10962e-27	Mllt10
2.66572e-32	1.01637	0.4	0.12	1.35115e-27	Sept11
2.85268e-32	1.44267	0.38	0.108	1.44591e-27	Ppp1r16b
2.97972e-32	1.14929	0.522	0.194	1.5103e-27	U2surp
2.99902e-32	1.46979	0.467	0.166	1.52008e-27	Ylpm1
3.31207e-32	1.22622	0.514	0.189	1.67875e-27	Map4k4
3.31976e-32	5.64005	0.804	0.527	1.68265e-27	Gm2163
3.50881e-32	0.969038	0.384	0.111	1.77848e-27	Atp6v1h
3.67574e-32	1.34145	0.31	0.071	1.86309e-27	Gm15645
4.27957e-32	0.46934	0.196	0.026	2.16914e-27	Clvs2
4.44355e-32	1.26781	0.518	0.201	2.25226e-27	Wdr33
4.602e-32	1.73059	0.616	0.271	2.33257e-27	Ehbp1
4.65286e-32	1.56876	0.227	0.037	2.35835e-27	Map3k5
4.69369e-32	1.50879	0.471	0.167	2.37904e-27	P2ry14
4.84249e-32	1.39982	0.486	0.18	2.45446e-27	Ube4b
4.86618e-32	1.04888	0.443	0.145	2.46647e-27	Nsmce2
5.16704e-32	1.21594	0.431	0.139	2.61897e-27	Med13l
5.49954e-32	0.538018	0.192	0.025	2.7875e-27	Kif26b
6.13194e-32	1.87069	0.345	0.091	3.10804e-27	Kcnip3
6.16198e-32	3.62556	0.745	0.456	3.12326e-27	Magi1
6.31191e-32	0.640388	0.294	0.064	3.19926e-27	Rai1
6.738e-32	2.26873	0.565	0.259	3.41522e-27	Gad2
6.77874e-32	0.881048	0.31	0.071	3.43587e-27	Atf6
6.90618e-32	1.60268	0.506	0.189	3.50047e-27	Tbc1d5
7.31257e-32	0.804588	0.333	0.084	3.70645e-27	Ppm1l
7.4665e-32	0.321663	0.122	0.007	3.78447e-27	Gm43174
7.9716e-32	1.20806	0.396	0.117	4.04049e-27	Slc6a6
8.02096e-32	1.28262	0.388	0.113	4.06551e-27	Ube2w
8.26046e-32	0.388799	0.157	0.015	4.1869e-27	Gm42456
8.3661e-32	1.54215	0.49	0.181	4.24044e-27	Zfp445
9.14737e-32	1.6796	0.518	0.211	4.63644e-27	Fubp1
9.22852e-32	1.13245	0.471	0.163	4.67757e-27	Senp7
9.49943e-32	2.84294	0.506	0.193	4.81488e-27	Fam49b
9.55175e-32	1.3392	0.431	0.141	4.8414e-27	AW554918
1.24529e-31	1.47439	0.478	0.172	6.31187e-27	Cdk14
1.3504e-31	1.76371	0.455	0.161	6.84465e-27	Scai
1.38623e-31	0.694126	0.318	0.076	7.02625e-27	Cdon
1.44846e-31	1.18237	0.373	0.107	7.34165e-27	Pip5k1a
1.55716e-31	0.946654	0.439	0.143	7.89264e-27	Hmg20a
1.77282e-31	3.4917	0.384	0.113	8.98572e-27	Celf3
1.80989e-31	0.573571	0.173	0.02	9.17361e-27	Pou6f2
1.87196e-31	1.74925	0.6	0.263	9.48823e-27	Hivep3
1.8923e-31	1.22282	0.408	0.127	9.59132e-27	Akap10
2.11058e-31	0.553079	0.208	0.031	1.06977e-26	Gm19410
2.21507e-31	0.477243	0.255	0.048	1.12273e-26	Fbxl2
2.35231e-31	3.26213	0.686	0.369	1.19229e-26	Psd3
2.39237e-31	1.64703	0.584	0.26	1.2126e-26	Pan3
2.76385e-31	2.23128	0.502	0.198	1.40089e-26	Arid4b
2.86337e-31	1.35307	0.533	0.216	1.45133e-26	Atxn10
2.8793e-31	0.794878	0.294	0.066	1.4594e-26	Rnf112
2.93694e-31	1.78608	0.467	0.173	1.48862e-26	Zmym2
2.96917e-31	0.894591	0.427	0.136	1.50495e-26	Brwd1
2.98369e-31	0.72565	0.357	0.096	1.51231e-26	Mcf2l
3.09824e-31	1.9022	0.561	0.239	1.57037e-26	Naaladl2
3.17703e-31	0.905329	0.357	0.098	1.61031e-26	Dnajc6
3.37214e-31	1.6213	0.463	0.164	1.7092e-26	Chd2
3.61598e-31	1.14133	0.408	0.128	1.8328e-26	Sertad2
3.62495e-31	0.588629	0.212	0.033	1.83734e-26	Rnf207
3.66121e-31	1.2742	0.451	0.16	1.85572e-26	Kdm4c
3.74148e-31	3.27814	0.522	0.203	1.89641e-26	Cfap54
3.96887e-31	2.4519	0.596	0.27	2.01166e-26	Strn3
4.07892e-31	1.94452	0.529	0.222	2.06744e-26	Tcaf1
4.27669e-31	4.00049	0.698	0.374	2.16769e-26	Nrcam
4.82576e-31	1.19169	0.463	0.164	2.44598e-26	Evl
5.09322e-31	0.971211	0.322	0.081	2.58155e-26	Slc2a3
5.615e-31	1.33586	0.404	0.127	2.84602e-26	Peak1
5.81033e-31	0.956898	0.38	0.112	2.94502e-26	Cap1
5.81301e-31	1.11602	0.392	0.116	2.94638e-26	Vps13d
6.06131e-31	1.43278	0.522	0.208	3.07223e-26	Car11
6.48323e-31	1.97054	0.51	0.203	3.28609e-26	Ankhd1
7.39296e-31	2.41566	0.631	0.314	3.7472e-26	1110051M20Rik
7.52451e-31	1.37795	0.522	0.204	3.81388e-26	Rock1
7.62334e-31	0.514686	0.231	0.04	3.86396e-26	Kcnh5
7.72379e-31	0.823493	0.353	0.096	3.91488e-26	P4ha1
7.86492e-31	0.756012	0.349	0.093	3.98642e-26	Rnf130
8.25882e-31	0.644608	0.22	0.036	4.18607e-26	Prpf3
8.33581e-31	2.62648	0.561	0.238	4.22509e-26	Setd5
8.38322e-31	2.08436	0.635	0.31	4.24912e-26	Tra2a
8.91765e-31	0.850412	0.349	0.095	4.52e-26	Fam171a1
9.40331e-31	0.867777	0.357	0.099	4.76616e-26	Gripap1
9.77477e-31	0.391337	0.149	0.014	4.95444e-26	4930598N05Rik
9.88421e-31	0.296451	0.137	0.011	5.00991e-26	Gm43248
9.95849e-31	1.19062	0.365	0.105	5.04756e-26	Cacng3
1.02796e-30	0.32719	0.129	0.009	5.21031e-26	Galnt14
1.15535e-30	0.470669	0.208	0.032	5.85599e-26	Srrm4
1.18642e-30	3.43442	0.557	0.24	6.01349e-26	Rbm26
1.37401e-30	1.02369	0.427	0.139	6.96429e-26	Fam49a
1.50542e-30	0.477209	0.157	0.016	7.63035e-26	Gm10851
1.55953e-30	0.979739	0.333	0.087	7.90462e-26	Arhgef7
1.63622e-30	0.836657	0.42	0.135	8.29336e-26	Thoc1
1.70688e-30	0.795385	0.251	0.049	8.65149e-26	Susd4
1.72498e-30	0.968322	0.388	0.118	8.74325e-26	Usp3
1.84193e-30	1.17196	0.196	0.029	9.336e-26	Stard5
1.94063e-30	0.995103	0.42	0.136	9.83626e-26	Pcca
1.97106e-30	0.935739	0.388	0.119	9.99053e-26	Cul5
2.02967e-30	2.35549	0.784	0.489	1.02876e-25	Pnisr
2.13968e-30	-8.18312	0.435	0.746	1.08452e-25	mt-Nd2
2.15186e-30	1.09381	0.38	0.114	1.09069e-25	Metap1d
2.26051e-30	1.50024	0.569	0.251	1.14576e-25	Wnk1
2.4847e-30	0.74676	0.294	0.068	1.2594e-25	Nhs
2.52283e-30	1.03878	0.314	0.078	1.27872e-25	B230209E15Rik
2.61499e-30	1.34293	0.455	0.162	1.32543e-25	Tia1
2.94368e-30	1.64159	0.373	0.11	1.49203e-25	Nr2c2
3.03604e-30	1.38126	0.471	0.168	1.53885e-25	Gbf1
3.43584e-30	3.03828	0.671	0.372	1.74149e-25	Igf1r
3.52041e-30	0.447465	0.165	0.018	1.78436e-25	Nusap1
3.7876e-30	0.811301	0.4	0.124	1.91978e-25	March7
4.10767e-30	1.14536	0.494	0.188	2.08201e-25	2410089E03Rik
4.26153e-30	0.726085	0.22	0.038	2.16e-25	Nipal2
4.77175e-30	0.490927	0.196	0.029	2.41861e-25	Slc44a5
4.96044e-30	0.952263	0.396	0.124	2.51425e-25	Stxbp5
4.97669e-30	0.604687	0.31	0.076	2.52248e-25	Trpc1
5.02293e-30	1.06117	0.459	0.164	2.54592e-25	Gatad2b
5.19831e-30	0.314783	0.149	0.014	2.63481e-25	Gm14204
5.21603e-30	2.01571	0.718	0.409	2.6438e-25	Fgfr2
5.51112e-30	0.718363	0.357	0.099	2.79337e-25	Cep350
5.96206e-30	0.952356	0.29	0.067	3.02193e-25	Gabrg2
6.0297e-30	1.0166	0.353	0.099	3.05621e-25	Asb3
7.33417e-30	0.700508	0.278	0.062	3.7174e-25	Wscd2
7.52029e-30	0.999626	0.353	0.101	3.81174e-25	Lzts1
7.89762e-30	0.965865	0.369	0.107	4.00299e-25	Ralgps1
7.92162e-30	1.68888	0.42	0.141	4.01515e-25	Sorcs2
8.11365e-30	0.614578	0.275	0.06	4.11248e-25	Lrrfip1
8.45809e-30	2.08094	0.502	0.199	4.28707e-25	Chchd3
8.88818e-30	0.979333	0.459	0.165	4.50506e-25	Senp6
9.56587e-30	0.577308	0.227	0.041	4.84855e-25	Osbpl3
1.20012e-29	0.80649	0.227	0.041	6.08293e-25	Gabra1
1.2034e-29	2.02389	0.514	0.213	6.09955e-25	Asxl2
1.22743e-29	1.24031	0.412	0.138	6.22133e-25	Lyst
1.25892e-29	0.850729	0.259	0.054	6.38095e-25	Samd5
1.33588e-29	0.721833	0.286	0.066	6.77105e-25	Arfgef2
1.5794e-29	0.72774	0.263	0.055	8.00534e-25	Ak5
1.63674e-29	2.18738	0.635	0.313	8.29596e-25	Apc
1.69519e-29	1.38102	0.435	0.151	8.59224e-25	Kdm5c
1.77673e-29	0.581569	0.188	0.027	9.00552e-25	Pik3c2b
1.81678e-29	0.908006	0.341	0.094	9.20854e-25	Ust
1.86364e-29	0.495374	0.239	0.045	9.44602e-25	Rab8b
1.88489e-29	1.21963	0.369	0.113	9.55377e-25	Btaf1
2.02031e-29	0.692121	0.365	0.105	1.02401e-24	Arhgap6
2.08845e-29	0.811463	0.357	0.103	1.05855e-24	Kdm3a
2.34083e-29	0.984525	0.388	0.122	1.18648e-24	Atp11c
2.40889e-29	1.17518	0.447	0.156	1.22097e-24	Ints6
2.44017e-29	0.757195	0.357	0.102	1.23682e-24	Dennd4a
2.45377e-29	1.04294	0.404	0.132	1.24372e-24	Ppp2r5e
2.65822e-29	2.13049	0.655	0.349	1.34734e-24	Tnrc6b
2.67304e-29	1.7256	0.604	0.283	1.35486e-24	Top1
2.73694e-29	0.558697	0.251	0.051	1.38724e-24	Gm9801
2.83011e-29	3.44528	0.745	0.485	1.43447e-24	Rtn3
2.86632e-29	0.923823	0.455	0.16	1.45282e-24	Zfp292
2.91061e-29	0.407654	0.153	0.016	1.47527e-24	Gm45178
2.93968e-29	0.585521	0.2	0.031	1.49001e-24	Pls1
3.01248e-29	0.733308	0.278	0.063	1.5269e-24	Lrrc8c
3.0683e-29	1.01807	0.38	0.117	1.5552e-24	Rnf216
3.1183e-29	3.01416	0.694	0.384	1.58054e-24	Spag9
3.23825e-29	0.925989	0.357	0.105	1.64134e-24	Esyt2
3.24801e-29	2.04346	0.741	0.455	1.64628e-24	Kif21a
3.28567e-29	0.472012	0.153	0.016	1.66538e-24	RP24-93K4.3
3.47631e-29	1.52587	0.522	0.221	1.762e-24	Zcchc11
3.49287e-29	1.51826	0.459	0.169	1.7704e-24	Mef2a
3.68438e-29	2.39732	0.745	0.453	1.86746e-24	Pou2f1
3.76797e-29	1.47339	0.467	0.179	1.90983e-24	Erc1
3.89241e-29	1.13534	0.376	0.115	1.97291e-24	Ncoa7
3.98225e-29	1.96948	0.745	0.443	2.01844e-24	Gm17167
4.41298e-29	0.635255	0.294	0.07	2.23676e-24	Zmym1
4.44963e-29	0.411749	0.173	0.022	2.25534e-24	Nrp1
4.54493e-29	1.03998	0.306	0.076	2.30364e-24	Khdrbs3
5.16202e-29	0.747954	0.271	0.06	2.61642e-24	Flnb
5.19781e-29	0.765004	0.282	0.066	2.63456e-24	Uxs1
5.49899e-29	0.737165	0.388	0.12	2.78722e-24	BC052040
5.93636e-29	2.11053	0.522	0.216	3.0089e-24	Zmym4
5.94942e-29	0.864934	0.302	0.075	3.01552e-24	Mpp7
6.23638e-29	1.3114	0.451	0.165	3.16097e-24	Ppp2r2a
6.62389e-29	2.91779	0.659	0.348	3.35739e-24	Mad1l1
6.66222e-29	0.641758	0.2	0.032	3.37681e-24	Pou2f2
7.01964e-29	0.446123	0.204	0.033	3.55798e-24	Mms22l
7.05708e-29	1.04588	0.427	0.145	3.57695e-24	Usp47
7.14482e-29	1.14647	0.2	0.032	3.62142e-24	Plekha6
7.22492e-29	1.37911	0.388	0.126	3.66202e-24	Kdm7a
7.27597e-29	0.987569	0.427	0.145	3.6879e-24	Smarcc1
7.77817e-29	0.60001	0.314	0.08	3.94244e-24	2510009E07Rik
8.49995e-29	0.278455	0.11	0.006	4.30828e-24	RP23-424I1.1
8.72075e-29	0.832791	0.298	0.073	4.4202e-24	RP24-89C4.5
8.84459e-29	0.966725	0.361	0.108	4.48297e-24	Mark1
9.04147e-29	0.449827	0.184	0.026	4.58276e-24	Osbpl10
9.60571e-29	0.733955	0.286	0.067	4.86875e-24	Lnpk
9.69514e-29	1.02018	0.459	0.167	4.91408e-24	Scaf8
1.05805e-28	2.4828	0.467	0.176	5.36283e-24	Trim35
1.18352e-28	0.529484	0.165	0.02	5.99877e-24	Cdh6
1.34026e-28	1.01645	0.392	0.127	6.79324e-24	Qrich1
1.44432e-28	1.74763	0.4	0.132	7.32069e-24	Cdkl5
1.45015e-28	1.89693	0.514	0.211	7.35025e-24	Nktr
1.46637e-28	0.685784	0.271	0.06	7.43245e-24	Mblac2
1.48413e-28	1.57636	0.416	0.144	7.52244e-24	Gapvd1
1.52881e-28	5.89493	0.635	0.332	7.74892e-24	Arglu1
1.58223e-28	0.743983	0.365	0.108	8.01969e-24	Dmxl2
1.5849e-28	3.50863	0.58	0.276	8.03324e-24	Nipbl
1.6213e-28	2.08777	0.502	0.201	8.21774e-24	Tulp4
1.63238e-28	1.41063	0.522	0.226	8.27388e-24	Plppr4
1.65962e-28	1.13463	0.314	0.082	8.41193e-24	Exoc5
1.67753e-28	1.5203	0.412	0.138	8.50271e-24	Phactr3
1.75801e-28	4.53108	0.478	0.185	8.91066e-24	Taok1
1.77438e-28	1.25415	0.306	0.078	8.99361e-24	Fer
1.8686e-28	0.742558	0.345	0.098	9.47118e-24	Fam178a
2.48009e-28	0.79442	0.369	0.112	1.25706e-23	Mboat2
2.52493e-28	1.60781	0.494	0.198	1.27978e-23	Hs2st1
2.5729e-28	1.90092	0.463	0.178	1.3041e-23	Zfp148
2.66611e-28	1.23855	0.424	0.147	1.35135e-23	Cmip
2.81822e-28	0.817598	0.353	0.104	1.42844e-23	Dennd1b
2.99023e-28	0.677022	0.29	0.07	1.51563e-23	Abhd18
2.99058e-28	1.03609	0.471	0.179	1.51581e-23	Phf20l1
3.05075e-28	0.722286	0.349	0.1	1.5463e-23	Cwc27
3.11643e-28	1.37058	0.467	0.177	1.57959e-23	Bcr
3.26888e-28	1.00738	0.337	0.096	1.65686e-23	AC149090.1
3.35963e-28	0.4321	0.196	0.031	1.70286e-23	Usp28
3.44839e-28	1.61352	0.459	0.172	1.74785e-23	Itch
3.64789e-28	1.18979	0.541	0.231	1.84897e-23	Hnrnpr
3.73371e-28	0.342887	0.145	0.015	1.89247e-23	Myt1
3.93041e-28	1.19753	0.42	0.15	1.99217e-23	2310035C23Rik
4.07069e-28	0.681092	0.329	0.091	2.06327e-23	Hnrnpll
4.29369e-28	0.755147	0.278	0.066	2.1763e-23	Kazn
4.37838e-28	5.9439	0.698	0.394	2.21923e-23	Atp6v0b
4.43316e-28	1.09184	0.345	0.1	2.24699e-23	Camkmt
4.66451e-28	1.19007	0.443	0.163	2.36425e-23	Btrc
4.88692e-28	1.56809	0.373	0.117	2.47698e-23	Tet3
4.90695e-28	0.874084	0.341	0.099	2.48714e-23	Ankib1
5.33233e-28	0.810375	0.341	0.098	2.70274e-23	Gmcl1
5.33832e-28	0.654999	0.267	0.06	2.70578e-23	Spata5
5.35531e-28	0.845547	0.416	0.141	2.71439e-23	Arel1
5.96577e-28	1.02689	0.376	0.12	3.02381e-23	Gucy1b3
6.15522e-28	1.39476	0.337	0.095	3.11983e-23	Edil3
6.42187e-28	0.534463	0.208	0.036	3.25499e-23	D130043K22Rik
6.69081e-28	5.02261	0.765	0.485	3.3913e-23	Penk
7.53008e-28	-4.60847	0.98	0.879	3.8167e-23	Msi2
7.7327e-28	1.02997	0.349	0.102	3.9194e-23	St7
7.91148e-28	1.32471	0.49	0.198	4.01001e-23	Cstf3
9.11505e-28	1.82141	0.486	0.201	4.62005e-23	Prpf4b
9.15278e-28	0.93179	0.392	0.128	4.63918e-23	RP23-456K21.1
1.01425e-27	0.722799	0.329	0.091	5.1408e-23	Hmbox1
1.05685e-27	3.82531	0.725	0.437	5.35677e-23	Snrnp70
1.05771e-27	0.453655	0.243	0.05	5.3611e-23	Pcsk7
1.11169e-27	2.21616	0.412	0.147	5.63469e-23	Gm26694
1.11305e-27	5.0837	0.722	0.431	5.64159e-23	Trim9
1.12524e-27	0.347456	0.6	0.301	5.70337e-23	Adk
1.22732e-27	0.561109	0.18	0.026	6.22078e-23	Rtn4rl1
1.23642e-27	0.807523	0.298	0.076	6.26693e-23	Sec24a
1.43276e-27	1.28677	0.369	0.116	7.26207e-23	Psat1
1.45775e-27	0.444924	0.169	0.023	7.38876e-23	Tmem2
1.53125e-27	0.797908	0.451	0.172	7.7613e-23	Ankrd6
1.56248e-27	0.688152	0.263	0.06	7.91961e-23	Slc1a1
1.57928e-27	1.08835	0.412	0.141	8.00472e-23	Peli1
1.66695e-27	0.543344	0.278	0.066	8.44912e-23	Zbtb11
1.66902e-27	2.52176	0.969	0.85	8.45958e-23	Frmd4a
1.80048e-27	1.15303	0.373	0.118	9.12592e-23	Dennd6a
1.8437e-27	0.809413	0.353	0.106	9.34497e-23	Tfdp2
1.96932e-27	1.60753	0.408	0.148	9.9817e-23	Soga3
2.04188e-27	1.18354	0.435	0.159	1.03495e-22	Dzip3
2.06069e-27	0.678662	0.31	0.082	1.04448e-22	D5Ertd579e
2.08803e-27	0.622335	0.196	0.032	1.05834e-22	Afm
2.094e-27	5.07603	0.78	0.513	1.06137e-22	Sptbn1
2.09437e-27	1.09646	0.373	0.117	1.06155e-22	Pet100
2.13002e-27	1.52069	0.208	0.037	1.07962e-22	D430036J16Rik
2.16225e-27	1.74449	0.522	0.221	1.09596e-22	Chd6
2.17894e-27	0.655633	0.361	0.11	1.10442e-22	Kdm5a
2.24395e-27	5.74167	0.965	0.906	1.13737e-22	Gpm6b
2.33192e-27	0.727358	0.337	0.097	1.18196e-22	Apba2
2.6919e-27	1.01771	0.38	0.126	1.36442e-22	Lrrc49
2.69903e-27	1.46269	0.463	0.177	1.36803e-22	Ncoa2
2.95767e-27	0.799961	0.235	0.049	1.49913e-22	Vcan
3.12713e-27	2.42647	0.459	0.186	1.58501e-22	Grik5
3.2221e-27	2.4046	0.522	0.23	1.63315e-22	Cnot4
3.75723e-27	0.87402	0.302	0.079	1.90439e-22	Mitf
3.84566e-27	1.13029	0.671	0.35	1.94921e-22	Srgap3
3.96121e-27	1.30149	0.353	0.11	2.00778e-22	Aftph
4.24133e-27	1.33501	0.392	0.134	2.14976e-22	Camkk2
4.74685e-27	-1.01035	0.259	0.059	2.40599e-22	Gm44905
4.74687e-27	1.09516	0.29	0.073	2.406e-22	Chrm1
4.96547e-27	1.26357	0.384	0.129	2.5168e-22	Rfwd2
5.07202e-27	0.585948	0.251	0.055	2.5708e-22	Rundc3b
5.08856e-27	1.87557	0.471	0.191	2.57919e-22	Desi2
5.22242e-27	0.713947	0.357	0.108	2.64703e-22	Wwp1
5.70981e-27	1.16752	0.388	0.131	2.89407e-22	Bmt2
6.04262e-27	0.752098	0.271	0.065	3.06276e-22	Ctnnbl1
6.24879e-27	0.886757	0.4	0.136	3.16726e-22	Sclt1
6.39035e-27	0.987801	0.376	0.121	3.23901e-22	Psmd1
6.51383e-27	1.00452	0.349	0.107	3.3016e-22	Tasp1
6.5591e-27	1.01899	0.416	0.146	3.32455e-22	Psmd14
6.59248e-27	1.21395	0.427	0.159	3.34147e-22	Smg1
7.03668e-27	1.07561	0.416	0.149	3.56661e-22	Dnajc7
7.11398e-27	0.673623	0.318	0.088	3.60579e-22	Picalm
7.20115e-27	1.14252	0.439	0.163	3.64998e-22	Evi5
7.58928e-27	0.969504	0.447	0.17	3.8467e-22	Rb1cc1
7.98112e-27	0.664322	0.333	0.095	4.04531e-22	Thtpa
7.98644e-27	0.58086	0.282	0.07	4.04801e-22	Tiam1
8.15724e-27	4.74485	0.549	0.275	4.13458e-22	Oxct1
8.26205e-27	2.64044	0.733	0.447	4.1877e-22	Atp2a2
8.32026e-27	0.855075	0.329	0.095	4.21721e-22	Strip2
8.33982e-27	0.705872	0.392	0.127	4.22712e-22	Epha3
8.35172e-27	0.843514	0.337	0.099	4.23315e-22	Elavl3
8.41766e-27	1.88847	0.62	0.31	4.26657e-22	Agbl4
9.08629e-27	0.851167	0.286	0.073	4.60548e-22	RP23-331E5.5
9.11158e-27	1.14731	0.459	0.179	4.6183e-22	Chka
9.61936e-27	1.10339	0.353	0.111	4.87567e-22	Adgrl2
9.82662e-27	1.12152	0.467	0.183	4.98072e-22	Smurf2
1.06383e-26	0.41269	0.176	0.026	5.39211e-22	Ccdc149
1.06432e-26	1.94377	0.682	0.405	5.39462e-22	Kcnn2
1.06643e-26	0.552675	0.306	0.081	5.40532e-22	Slc6a17
1.16352e-26	5.47924	0.922	0.794	5.89739e-22	Dtna
1.24147e-26	7.64586	0.82	0.589	6.29249e-22	Gnao1
1.2907e-26	0.788929	0.349	0.105	6.54202e-22	Fbxo42
1.32744e-26	0.85184	0.329	0.095	6.72828e-22	Akap8
1.39636e-26	2.16421	0.639	0.342	7.07759e-22	Rbm25
1.4213e-26	1.02321	0.396	0.135	7.20401e-22	Vwa8
1.45784e-26	1.00053	0.38	0.125	7.38922e-22	Trappc9
1.50219e-26	0.988392	0.451	0.17	7.61402e-22	Mir9-3hg
1.50318e-26	0.86143	0.349	0.105	7.61902e-22	Rev1
1.56936e-26	1.79348	0.498	0.207	7.95444e-22	Zmynd11
1.59434e-26	1.32945	0.455	0.18	8.08106e-22	Papola
1.6172e-26	1.50617	0.439	0.167	8.19692e-22	2010111I01Rik
1.62363e-26	2.41742	0.349	0.106	8.22952e-22	Lgi1
1.73727e-26	0.723025	0.302	0.08	8.80552e-22	Cep128
2.1283e-26	0.943649	0.392	0.134	1.07875e-21	Cbfa2t2
2.39036e-26	0.516976	0.145	0.017	1.21158e-21	Gm26905
2.7788e-26	1.92313	0.522	0.229	1.40846e-21	Ktn1
2.8522e-26	0.902858	0.404	0.142	1.44566e-21	Ank
2.9877e-26	0.709452	0.369	0.119	1.51434e-21	Gm1976
3.11659e-26	0.377386	0.149	0.018	1.57967e-21	Far2
3.14162e-26	1.28569	0.424	0.155	1.59236e-21	Prpf40a
3.2775e-26	1.5851	0.459	0.183	1.66123e-21	Atad2b
3.36234e-26	1.57884	0.467	0.19	1.70423e-21	Wdfy3
3.41355e-26	1.03057	0.4	0.139	1.73019e-21	Cpsf6
3.4727e-26	0.90294	0.243	0.054	1.76017e-21	Chn2
3.53658e-26	0.356038	0.153	0.019	1.79255e-21	Tgfbr3
3.56673e-26	0.702147	0.239	0.052	1.80783e-21	Spats2
3.70416e-26	1.26678	0.4	0.143	1.87749e-21	Prelid3a
3.72973e-26	1.04354	0.357	0.112	1.89045e-21	Nup98
3.77173e-26	0.761029	0.302	0.082	1.91174e-21	Ubap2
3.80172e-26	0.488571	0.196	0.034	1.92694e-21	Tmem150c
3.98215e-26	1.0681	0.337	0.102	2.01839e-21	Sf3b3
3.98448e-26	0.963747	0.353	0.111	2.01957e-21	Ptpn9
4.02284e-26	0.545759	0.243	0.054	2.03902e-21	Cnst
4.13149e-26	1.09411	0.306	0.084	2.09409e-21	D430042O09Rik
4.29011e-26	0.387949	0.173	0.026	2.17448e-21	Filip1
4.64779e-26	0.64624	0.349	0.107	2.35578e-21	Ep300
4.69335e-26	1.87923	0.518	0.227	2.37887e-21	Rsf1
4.88449e-26	1.13885	0.369	0.12	2.47575e-21	Ube2h
5.3374e-26	0.901604	0.388	0.132	2.70532e-21	Ino80d
5.34269e-26	1.0407	0.373	0.123	2.708e-21	Usp37
7.60173e-26	0.905373	0.373	0.123	3.85301e-21	Tet2
8.26182e-26	2.56822	0.557	0.269	4.18759e-21	Ptpn5
8.47713e-26	0.488979	0.176	0.027	4.29672e-21	Ankrd13a
9.48711e-26	0.458971	0.196	0.035	4.80864e-21	Rmnd1
1.00254e-25	0.898641	0.255	0.06	5.08146e-21	Gdpd1
1.04267e-25	0.836351	0.263	0.064	5.28486e-21	Kcna4
1.06642e-25	1.38524	0.588	0.282	5.40527e-21	Kmt2c
1.08699e-25	0.653681	0.18	0.029	5.50951e-21	Gdpd5
1.11604e-25	2.46155	0.435	0.165	5.65678e-21	Atp9a
1.13344e-25	1.8919	0.494	0.209	5.74496e-21	Rab11fip2
1.33081e-25	1.93479	0.549	0.264	6.74532e-21	Pde1b
1.49422e-25	3.66332	0.659	0.381	7.57362e-21	Fmn2
1.49438e-25	1.08944	0.42	0.156	7.57444e-21	Drg1
1.5435e-25	2.52997	0.518	0.235	7.82338e-21	Ap2b1
1.544e-25	0.942968	0.302	0.084	7.82593e-21	St3gal3
1.60928e-25	1.11455	0.298	0.082	8.15682e-21	Zdhhc2
1.77765e-25	1.18656	0.337	0.105	9.0102e-21	Stmn2
1.8568e-25	0.480875	0.231	0.049	9.41138e-21	Gpr155
1.9377e-25	0.564567	0.278	0.071	9.82145e-21	Pde7a
1.98858e-25	1.07704	0.404	0.145	1.00793e-20	Zdhhc20
2.01604e-25	0.833969	0.322	0.094	1.02185e-20	Papd5
2.04169e-25	0.82223	0.286	0.076	1.03485e-20	2610316D01Rik
2.07142e-25	0.300156	0.129	0.013	1.04992e-20	Gm42616
2.31935e-25	0.45907	0.176	0.028	1.17558e-20	Gm37340
2.32392e-25	1.3262	0.451	0.178	1.1779e-20	Dync1i2
2.63854e-25	0.390517	0.137	0.015	1.33737e-20	March11
2.70581e-25	0.845939	0.345	0.108	1.37147e-20	Nfyc
2.77788e-25	11.7378	0.675	0.423	1.40799e-20	Spag5
2.79186e-25	1.48253	0.541	0.258	1.41508e-20	Pias1
2.79771e-25	1.04218	0.424	0.161	1.41805e-20	Dlgap4
2.85816e-25	0.794519	0.247	0.057	1.44869e-20	Ajap1
2.94345e-25	0.408126	0.173	0.027	1.49192e-20	Shb
3.12221e-25	1.37213	0.506	0.222	1.58252e-20	Rbm5
3.20282e-25	0.728116	0.471	0.188	1.62338e-20	Rufy3
3.29502e-25	1.21034	0.463	0.181	1.67011e-20	Clasp1
3.71739e-25	1.47569	0.439	0.169	1.8842e-20	Zfp280d
4.27205e-25	1.08399	0.427	0.164	2.16533e-20	Itsn2
4.30562e-25	0.254071	0.11	0.008	2.18235e-20	Igsf9
4.36782e-25	0.799099	0.31	0.09	2.21387e-20	Fam193b
4.42507e-25	3.64914	0.165	0.024	2.24289e-20	Klhl1
4.47729e-25	1.11378	0.6	0.297	2.26936e-20	Cspp1
4.93691e-25	1.67994	0.478	0.206	2.50232e-20	Vmp1
5.1606e-25	1.66312	0.49	0.211	2.6157e-20	Bptf
5.21554e-25	0.844843	0.345	0.11	2.64355e-20	Tmem161b
5.3077e-25	0.634631	0.569	0.272	2.69026e-20	Sncaip
5.54953e-25	1.35647	0.455	0.187	2.81283e-20	Vti1b
5.90853e-25	0.902512	0.427	0.16	2.9948e-20	Pik3c2a
5.97357e-25	0.879286	0.365	0.121	3.02777e-20	Arntl
6.00724e-25	0.622201	0.263	0.065	3.04483e-20	Agk
6.17972e-25	1.43233	0.486	0.204	3.13225e-20	Ankrd12
6.23063e-25	1.10878	0.412	0.151	3.15806e-20	Zc3h12b
6.54139e-25	0.370263	0.125	0.013	3.31557e-20	Gm1992
6.76471e-25	0.627268	0.29	0.079	3.42876e-20	Meis1
7.07449e-25	0.91409	0.361	0.119	3.58577e-20	Urgcp
8.00702e-25	0.39615	0.157	0.022	4.05844e-20	Gfod1
8.15735e-25	0.376402	0.129	0.014	4.13464e-20	Gm44562
8.92648e-25	1.44087	0.502	0.229	4.52447e-20	Sf3b1
9.5146e-25	0.919353	0.373	0.128	4.82257e-20	Slc25a12
9.84569e-25	0.367216	0.153	0.021	4.99039e-20	Ryr1
1.01129e-24	0.423724	0.255	0.061	5.12582e-20	Zfx
1.03069e-24	1.31896	0.396	0.144	5.22418e-20	Sbno1
1.05294e-24	0.630112	0.212	0.043	5.33691e-20	Dclk3
1.13873e-24	1.11752	0.392	0.139	5.77175e-20	Ccny
1.16577e-24	1.01358	0.259	0.066	5.90884e-20	1700016P03Rik
1.16806e-24	0.829683	0.239	0.055	5.92042e-20	Gm26835
1.27338e-24	0.98377	0.459	0.185	6.45425e-20	Chd4
1.33457e-24	0.997874	0.392	0.141	6.7644e-20	Dzank1
1.3374e-24	1.25949	0.392	0.141	6.77876e-20	Pitpnm2
1.36084e-24	1.08638	0.341	0.108	6.89757e-20	Pag1
1.40911e-24	3.50206	0.384	0.135	7.14219e-20	Ranbp2
1.43154e-24	0.540414	0.212	0.043	7.2559e-20	Sntg2
1.62247e-24	1.14346	0.412	0.151	8.22367e-20	Gm26904
1.80907e-24	1.13202	0.373	0.126	9.16943e-20	Btbd7
1.82746e-24	0.355478	0.165	0.025	9.26266e-20	Asxl3
1.85141e-24	0.376454	0.165	0.025	9.38407e-20	Atad2
1.85538e-24	1.53557	0.439	0.183	9.40416e-20	Zfp462
1.97835e-24	0.476436	0.196	0.037	1.00274e-19	Coro7
2.23397e-24	0.434579	0.216	0.045	1.13231e-19	Myo1b
2.28221e-24	0.530501	0.282	0.076	1.15676e-19	Dpp8
2.3661e-24	1.16885	0.443	0.172	1.19928e-19	Insr
2.36793e-24	0.705694	0.314	0.092	1.20021e-19	Phc3
2.39458e-24	3.94033	0.678	0.435	1.21372e-19	Serpine2
2.62066e-24	1.14193	0.345	0.113	1.32831e-19	Drd2
2.91671e-24	0.864864	0.333	0.104	1.47837e-19	Hmgcll1
2.95591e-24	0.705596	0.286	0.079	1.49823e-19	Rnf111
3.26059e-24	0.345546	0.227	0.05	1.65266e-19	Mcph1
3.5239e-24	0.663461	0.2	0.039	1.78612e-19	Dcbld1
3.59419e-24	1.00832	0.267	0.069	1.82175e-19	Arsb
3.61429e-24	0.545932	0.231	0.052	1.83194e-19	Dnmbp
3.72383e-24	0.793189	0.267	0.069	1.88746e-19	Dmtn
3.75479e-24	1.01658	0.357	0.118	1.90315e-19	Serpine3
3.99785e-24	0.558488	0.263	0.067	2.02635e-19	Usp7
3.99831e-24	0.976973	0.365	0.125	2.02658e-19	Ddx50
4.08015e-24	0.541668	0.227	0.051	2.06807e-19	Smad3
4.16583e-24	0.845776	0.365	0.125	2.11149e-19	Mtmr3
4.18564e-24	1.3347	0.486	0.212	2.12153e-19	Atp1a3
4.2914e-24	1.18079	0.435	0.173	2.17514e-19	Mecp2
4.72728e-24	0.430748	0.161	0.024	2.39607e-19	March4
4.9323e-24	0.962338	0.341	0.111	2.49998e-19	Fryl
5.1121e-24	0.776441	0.306	0.091	2.59112e-19	Htt
5.17797e-24	0.798016	0.286	0.08	2.6245e-19	Glce
5.21352e-24	0.319716	0.137	0.017	2.64253e-19	St8sia2
5.25134e-24	0.496122	0.208	0.042	2.6617e-19	Oprk1
5.31721e-24	1.00227	0.396	0.147	2.69508e-19	Ubap2l
5.3354e-24	1.04404	0.388	0.141	2.7043e-19	Pkn2
5.37137e-24	0.783869	0.22	0.048	2.72253e-19	Lin28b
5.37736e-24	3.72823	0.835	0.672	2.72557e-19	Tspan7
5.43148e-24	1.86483	0.576	0.294	2.753e-19	Baz2b
6.01732e-24	0.931911	0.384	0.138	3.04994e-19	Bre
6.07429e-24	2.62639	0.686	0.419	3.07881e-19	Rtn4
6.08469e-24	1.58044	0.506	0.227	3.08409e-19	Aig1
6.3554e-24	0.814553	0.329	0.104	3.2213e-19	Wdr47
6.41313e-24	1.05431	0.361	0.122	3.25056e-19	Dym
6.77725e-24	1.07895	0.325	0.101	3.43512e-19	Cbl
7.7908e-24	0.658935	0.306	0.091	3.94884e-19	Atg16l1
8.14855e-24	1.56732	0.447	0.182	4.13017e-19	Ccnl2
8.17076e-24	0.747244	0.369	0.126	4.14143e-19	Appl1
8.21636e-24	0.370235	0.157	0.023	4.16454e-19	Gm10649
9.08051e-24	3.33647	0.796	0.554	4.60255e-19	Kif1b
9.15015e-24	1.52537	0.447	0.18	4.63784e-19	Bmpr1a
9.18408e-24	2.05135	0.655	0.386	4.65504e-19	Phlpp1
9.25632e-24	0.418079	0.122	0.013	4.69166e-19	Sgpp2
9.48756e-24	0.785416	0.337	0.109	4.80886e-19	Smarca4
9.98388e-24	1.23916	0.522	0.241	5.06043e-19	Bclaf1
1.00834e-23	1.16614	0.443	0.178	5.11089e-19	Tle1
1.03475e-23	0.68252	0.361	0.123	5.24472e-19	Tbl1xr1
1.08045e-23	0.999319	0.349	0.116	5.47636e-19	Gucy1a3
1.12677e-23	1.29442	0.447	0.185	5.71116e-19	Ulk2
1.14554e-23	0.789822	0.267	0.071	5.80627e-19	Tbcd
1.18152e-23	0.941838	0.314	0.097	5.98867e-19	Eml4
1.18998e-23	0.739002	0.329	0.104	6.03154e-19	Cnot1
1.22167e-23	0.625833	0.251	0.063	6.19215e-19	Ddx10
1.23714e-23	1.42194	0.408	0.158	6.27056e-19	Map2k6
1.26838e-23	0.505207	0.243	0.058	6.42892e-19	Atcay
1.2768e-23	0.984822	0.376	0.135	6.47158e-19	Ogdh
1.34541e-23	0.98599	0.408	0.152	6.81937e-19	Arfgef1
1.36435e-23	0.594819	0.224	0.05	6.91537e-19	Flrt3
1.49264e-23	2.39914	0.431	0.174	7.56561e-19	Gigyf2
1.65682e-23	0.326826	0.141	0.018	8.39778e-19	Gm17276
1.75461e-23	0.676383	0.302	0.089	8.89343e-19	Sipa1l3
1.79413e-23	1.06778	0.4	0.155	9.09373e-19	Psma3
1.83047e-23	0.418122	0.2	0.04	9.27794e-19	Gm27032
1.8547e-23	0.372892	0.137	0.017	9.40073e-19	Slco5a1
1.89585e-23	1.14771	0.435	0.177	9.60929e-19	Pds5a
1.91179e-23	0.275725	0.133	0.016	9.69008e-19	Atp2b3
1.92329e-23	1.1879	0.424	0.172	9.7484e-19	Pias2
1.94254e-23	0.806031	0.247	0.061	9.84598e-19	Map6
1.9732e-23	0.770102	0.29	0.082	1.00014e-18	Mnat1
1.9872e-23	0.612166	0.278	0.077	1.00723e-18	Zfp799
2.0664e-23	0.78536	0.322	0.101	1.04737e-18	Pgap1
2.12251e-23	0.353374	0.18	0.032	1.07582e-18	Cnnm1
2.4346e-23	0.969659	0.412	0.161	1.234e-18	Ggnbp2
2.44189e-23	1.37684	0.486	0.211	1.2377e-18	Mprip
2.44581e-23	0.717434	0.302	0.091	1.23968e-18	Dock11
2.50657e-23	0.448599	0.29	0.082	1.27048e-18	Riok3
2.52216e-23	0.465103	0.251	0.063	1.27838e-18	Gm15614
2.68322e-23	0.631041	0.22	0.049	1.36002e-18	RP23-453B15.7
2.74168e-23	0.714981	0.298	0.089	1.38965e-18	Cnot6l
2.80415e-23	0.396709	0.22	0.048	1.42131e-18	Micu2
2.86541e-23	0.66779	0.275	0.075	1.45236e-18	Esf1
2.92111e-23	0.497679	0.286	0.08	1.48059e-18	Vprbp
2.92825e-23	1.37584	0.412	0.166	1.48421e-18	Celf5
3.00308e-23	1.37325	0.42	0.167	1.52214e-18	Fam193a
3.08633e-23	0.504767	0.514	0.228	1.56434e-18	Thoc2
3.18116e-23	1.10342	0.463	0.197	1.61241e-18	Comt
3.19308e-23	1.44089	0.427	0.172	1.61844e-18	Atf2
3.19402e-23	-6.2138	0.863	0.672	1.61892e-18	Pitpnc1
3.30517e-23	0.971519	0.365	0.127	1.67526e-18	Slc38a9
3.8634e-23	1.76293	0.58	0.295	1.9582e-18	Lyrm4
3.89084e-23	1.25994	0.345	0.118	1.97211e-18	Fam219a
3.98849e-23	1.10462	0.478	0.21	2.02161e-18	Tom1l2
4.01833e-23	1.04661	0.251	0.064	2.03673e-18	Etv1
4.02714e-23	1.00371	0.271	0.074	2.04119e-18	Col6a1
4.14675e-23	0.781553	0.31	0.095	2.10182e-18	Eml1
4.47535e-23	0.425366	0.204	0.042	2.26838e-18	Gm20696
4.50626e-23	0.495794	0.255	0.066	2.28404e-18	Aatf
4.88702e-23	0.715851	0.31	0.095	2.47703e-18	Gm44511
4.94552e-23	0.494056	0.216	0.048	2.50669e-18	Ago4
5.01322e-23	0.943778	0.349	0.119	2.541e-18	Emsy
5.29164e-23	2.36225	0.294	0.086	2.68212e-18	Ola1
5.48551e-23	0.720577	0.275	0.076	2.78038e-18	Gm16432
5.59122e-23	1.58439	0.471	0.204	2.83397e-18	Pbrm1
5.91346e-23	0.35181	0.133	0.017	2.99729e-18	Smoc1
5.93819e-23	6.71134	0.639	0.373	3.00983e-18	Mat2a
6.10155e-23	0.562902	0.2	0.041	3.09263e-18	Nars2
6.2083e-23	1.67434	0.451	0.19	3.14674e-18	Lcorl
6.83342e-23	0.620005	0.247	0.063	3.46359e-18	Dnah6
7.21221e-23	1.15465	0.341	0.116	3.65558e-18	Tlk2
7.2862e-23	0.491481	0.22	0.049	3.69308e-18	Zfp821
7.41259e-23	1.11848	0.38	0.141	3.75715e-18	Itsn1
7.47286e-23	0.965752	0.412	0.163	3.7877e-18	Ube2k
7.49804e-23	0.73481	0.247	0.063	3.80046e-18	Nrip1
7.51697e-23	1.93811	0.443	0.182	3.81005e-18	Srek1
7.93325e-23	2.47651	0.659	0.404	4.02105e-18	Camk2a
8.283e-23	0.765792	0.314	0.099	4.19832e-18	Ttc7b
8.44712e-23	0.710141	0.282	0.081	4.2815e-18	Gtf3c1
8.71171e-23	0.794109	0.341	0.116	4.41562e-18	Fbxw11
8.74509e-23	0.705302	0.275	0.077	4.43254e-18	Igsf21
8.8086e-23	0.964584	0.204	0.043	4.46473e-18	Slc24a5
9.1152e-23	0.574766	0.208	0.045	4.62013e-18	Slco3a1
9.15506e-23	1.66377	0.447	0.188	4.64034e-18	Spred1
9.60747e-23	1.11832	0.459	0.194	4.86964e-18	Bmpr2
9.82469e-23	0.805916	0.286	0.083	4.97974e-18	Hip1
1.00853e-22	0.752116	0.42	0.165	5.11182e-18	St8sia3
1.05775e-22	0.834894	0.412	0.159	5.36133e-18	Rc3h2
1.05922e-22	0.77469	0.318	0.102	5.36878e-18	Sec24b
1.07125e-22	0.751723	0.427	0.172	5.42974e-18	Cdip1
1.15466e-22	0.578145	0.298	0.089	5.85249e-18	Smarcd3
1.18517e-22	1.82459	0.463	0.2	6.00718e-18	Wac
1.18974e-22	0.479665	0.204	0.043	6.03033e-18	Zfp933
1.19707e-22	1.23541	0.231	0.057	6.06745e-18	Mgat5b
1.28019e-22	1.31195	0.439	0.186	6.48876e-18	Arhgap21
1.36085e-22	0.835594	0.369	0.133	6.89761e-18	Nfx1
1.40261e-22	0.778985	0.306	0.094	7.10927e-18	6820431F20Rik
1.43698e-22	0.614229	0.329	0.107	7.28347e-18	Cdk8
1.47611e-22	0.326231	0.173	0.03	7.48181e-18	Gpr45
1.51341e-22	1.97046	0.612	0.334	7.67087e-18	Sorbs1
1.54479e-22	0.36565	0.122	0.014	7.82995e-18	Gm3294
1.57469e-22	4.51895	0.796	0.585	7.98148e-18	Ddx5
1.58465e-22	1.40983	0.565	0.294	8.03196e-18	Mgat5
1.62032e-22	0.456923	0.18	0.034	8.21275e-18	Ptpre
1.73882e-22	0.764495	0.349	0.119	8.81337e-18	Acyp2
1.81717e-22	0.781327	0.361	0.127	9.21049e-18	Ralgapb
1.84575e-22	0.951212	0.325	0.106	9.35537e-18	Scfd1
1.85234e-22	0.340681	0.176	0.032	9.38879e-18	Gm32250
1.86366e-22	1.04969	0.278	0.08	9.44614e-18	Tgfbr1
1.86694e-22	1.17826	0.4	0.154	9.46277e-18	Rptor
1.88827e-22	0.499725	0.278	0.079	9.57089e-18	Tmem131
1.89894e-22	0.440922	0.239	0.059	9.62497e-18	Kdm2b
1.95192e-22	0.58691	0.322	0.102	9.8935e-18	Creb1
1.97937e-22	0.50595	0.259	0.068	1.00326e-17	Sp3
1.98083e-22	0.977198	0.341	0.116	1.004e-17	Csnk1g3
2.05754e-22	0.834828	0.286	0.085	1.04288e-17	Mdn1
2.13181e-22	0.36061	0.106	0.01	1.08053e-17	Zfp618
2.14282e-22	0.595285	0.22	0.051	1.08611e-17	Nhsl2
2.15083e-22	0.814288	0.333	0.112	1.09017e-17	AU040320
2.28433e-22	0.590387	0.306	0.094	1.15784e-17	Smg7
2.48863e-22	0.582335	0.204	0.044	1.26139e-17	Tbc1d22a
2.5569e-22	0.5852	0.216	0.049	1.29599e-17	Frmd6
2.57637e-22	0.44994	0.153	0.024	1.30586e-17	Cdh7
2.63454e-22	0.422835	0.184	0.036	1.33534e-17	Atp6ap1l
2.77813e-22	1.4434	0.404	0.161	1.40813e-17	C530008M17Rik
2.817e-22	0.856021	0.29	0.087	1.42783e-17	Gabrd
2.87475e-22	0.791746	0.337	0.115	1.4571e-17	Adam10
2.89529e-22	0.647986	0.243	0.063	1.46751e-17	Elavl2
2.99216e-22	1.17569	0.502	0.228	1.51661e-17	Usp9x
3.04327e-22	1.18112	0.514	0.245	1.54251e-17	Etnk1
3.1224e-22	1.05861	0.38	0.146	1.58262e-17	Vcl
3.29373e-22	0.667797	0.306	0.095	1.66946e-17	Phf12
3.34771e-22	1.62548	0.365	0.131	1.69682e-17	Rsbn1l
3.35678e-22	1.02694	0.259	0.071	1.70142e-17	Kcnd3
3.38102e-22	0.423105	0.247	0.063	1.7137e-17	Lrpprc
3.41447e-22	0.928652	0.314	0.102	1.73066e-17	Upf3b
3.42473e-22	0.579777	0.31	0.096	1.73586e-17	Shprh
3.44847e-22	2.62256	0.718	0.434	1.74789e-17	Wwox
3.55987e-22	0.630353	0.369	0.133	1.80436e-17	Nsd2
3.58359e-22	0.933953	0.353	0.123	1.81638e-17	Zdhhc17
3.63193e-22	0.744525	0.31	0.098	1.84088e-17	Phf3
3.78854e-22	0.481976	0.231	0.057	1.92026e-17	Sh3gl1
3.80166e-22	2.13207	0.451	0.194	1.92691e-17	Bach2
3.95875e-22	0.664735	0.231	0.057	2.00653e-17	Ammecr1
4.05659e-22	0.859447	0.447	0.188	2.05612e-17	Ptbp2
4.10585e-22	0.466031	0.227	0.055	2.08109e-17	Ints9
4.1069e-22	0.56106	0.259	0.07	2.08162e-17	Actn4
4.31402e-22	1.40508	0.604	0.328	2.18661e-17	Nedd4
4.49675e-22	0.960574	0.431	0.177	2.27922e-17	Hnrnpm
4.49844e-22	0.928157	0.361	0.13	2.28008e-17	Ttc19
4.62598e-22	1.40139	0.424	0.176	2.34472e-17	Atp2c1
4.73947e-22	0.666272	0.251	0.067	2.40225e-17	Gm27241
4.86734e-22	-1.34453	0.286	0.086	2.46706e-17	Nxph1
5.0772e-22	0.598585	0.255	0.068	2.57343e-17	Txndc11
5.17839e-22	1.04612	0.427	0.173	2.62472e-17	Mgea5
5.39998e-22	1.58428	0.478	0.217	2.73704e-17	Cdk19
5.43528e-22	1.46065	0.431	0.184	2.75493e-17	Mtdh
5.61827e-22	0.53206	0.216	0.05	2.84768e-17	Gmeb2
6.20008e-22	0.904476	0.294	0.092	3.14257e-17	Il1rapl2
6.22698e-22	0.673292	0.349	0.122	3.15621e-17	Taf15
6.72473e-22	1.12825	0.373	0.139	3.40849e-17	Kdm2a
6.96492e-22	0.467506	0.184	0.036	3.53024e-17	B830012L14Rik
7.13088e-22	0.952542	0.302	0.096	3.61436e-17	Slc25a23
7.20388e-22	1.30851	0.451	0.195	3.65136e-17	Stx16
7.26526e-22	0.809307	0.298	0.094	3.68247e-17	Enox2
7.39481e-22	0.389386	0.173	0.032	3.74813e-17	Lrrc28
7.4583e-22	1.41146	0.573	0.307	3.78032e-17	Tsc22d1
7.52992e-22	0.562032	0.251	0.067	3.81662e-17	Nup214
7.67007e-22	1.09466	0.471	0.211	3.88765e-17	Klf7
7.87488e-22	0.438288	0.267	0.074	3.99146e-17	Brip1os
7.99252e-22	1.54783	0.365	0.133	4.05109e-17	Smarcad1
8.12563e-22	0.474427	0.267	0.074	4.11856e-17	Zkscan3
8.37655e-22	1.77633	0.514	0.261	4.24574e-17	Ptprs
8.59478e-22	0.468531	0.235	0.059	4.35635e-17	Lrrc8d
8.7037e-22	0.431947	0.216	0.049	4.41156e-17	D630045J12Rik
8.80695e-22	1.11113	0.447	0.188	4.46389e-17	Abi1
9.43126e-22	0.547494	0.204	0.045	4.78033e-17	Fam20c
9.51304e-22	0.395996	0.2	0.043	4.82178e-17	Setd4
9.55118e-22	0.806726	0.325	0.108	4.84111e-17	Mapk8
1.00783e-21	0.473299	0.239	0.061	5.10831e-17	Sh3gl2
1.01451e-21	0.399222	0.208	0.046	5.14217e-17	Grm4
1.02804e-21	0.372452	0.161	0.027	5.21072e-17	Clic6
1.05748e-21	1.1366	0.376	0.141	5.35994e-17	Epc1
1.06096e-21	0.530672	0.278	0.08	5.37759e-17	Zzz3
1.06783e-21	0.78359	0.325	0.11	5.41238e-17	Nbas
1.12219e-21	0.429245	0.157	0.026	5.68796e-17	Tbc1d30
1.12404e-21	0.377413	0.157	0.026	5.69731e-17	Mamld1
1.22355e-21	0.393556	0.471	0.209	6.20169e-17	Pcdh11x
1.36643e-21	0.912132	0.4	0.16	6.92591e-17	Gm15738
1.37073e-21	0.65916	0.275	0.081	6.94768e-17	Plcg1
1.38239e-21	0.666597	0.235	0.06	7.00677e-17	2700049A03Rik
1.41837e-21	2.17185	0.718	0.48	7.18916e-17	Scg5
1.41887e-21	0.409898	0.2	0.043	7.19168e-17	Csnk2a2
1.42254e-21	1.19244	0.431	0.183	7.21027e-17	Dync2h1
1.43906e-21	0.523372	0.188	0.039	7.29402e-17	Plppr3
1.57141e-21	0.58308	0.298	0.094	7.96483e-17	Zfp827
1.57358e-21	0.490677	0.224	0.054	7.97585e-17	Chfr
1.58219e-21	0.694075	0.306	0.098	8.01949e-17	H13
1.59068e-21	0.378773	0.184	0.037	8.06252e-17	Fnip2
1.62252e-21	0.672113	0.345	0.122	8.22389e-17	Gm21992
1.63504e-21	2.4591	0.565	0.306	8.28735e-17	Pafah1b1
1.64122e-21	0.727251	0.184	0.038	8.31869e-17	Pifo
1.66394e-21	0.489933	0.263	0.073	8.43386e-17	Dhdds
1.673e-21	1.4208	0.502	0.249	8.47978e-17	Sptan1
1.67797e-21	0.333644	0.141	0.021	8.50498e-17	Parm1
1.68032e-21	0.586375	0.333	0.114	8.51688e-17	Lonp2
1.68423e-21	0.343613	0.165	0.029	8.53667e-17	Atad5
1.73995e-21	1.04075	0.318	0.105	8.81912e-17	5330438D12Rik
1.82092e-21	0.537478	0.259	0.072	9.22953e-17	Papd4
1.89164e-21	0.612482	0.247	0.066	9.58797e-17	Fbxw4
1.90243e-21	0.884504	0.282	0.085	9.64265e-17	Xpo6
1.90382e-21	0.654301	0.333	0.113	9.6497e-17	Capn15
1.92498e-21	0.759723	0.365	0.133	9.75697e-17	Chd8
2.01893e-21	0.500716	0.259	0.071	1.02331e-16	3110056K07Rik
2.0933e-21	0.888841	0.427	0.18	1.06101e-16	Efr3b
2.11492e-21	0.813409	0.4	0.154	1.07197e-16	Abl2
2.19958e-21	0.433555	0.204	0.045	1.11488e-16	C2cd2
2.30589e-21	1.64226	0.706	0.423	1.16876e-16	Tox
2.40993e-21	1.54376	0.286	0.087	1.2215e-16	Gtf2ird1
2.47617e-21	0.740023	0.369	0.136	1.25507e-16	Vamp4
2.61843e-21	0.799848	0.31	0.101	1.32718e-16	Cdc27
2.63949e-21	1.89466	0.624	0.351	1.33785e-16	Ppp1r2
2.67241e-21	1.94899	0.365	0.136	1.35454e-16	Chd7
2.69835e-21	0.831345	0.31	0.1	1.36769e-16	Bsn
2.75644e-21	0.504625	0.2	0.044	1.39713e-16	Myo16
2.93867e-21	0.951116	0.412	0.167	1.48949e-16	Cdk12
2.98476e-21	3.27262	0.455	0.197	1.51286e-16	Jarid2
3.00984e-21	0.404825	0.2	0.044	1.52557e-16	Gcnt2
3.03261e-21	1.05176	0.51	0.243	1.53711e-16	Akap11
3.08583e-21	0.664757	0.275	0.082	1.56408e-16	Srpk1
3.10962e-21	0.864529	0.353	0.127	1.57614e-16	Tnks
3.24852e-21	0.554886	0.224	0.055	1.64654e-16	Gm12940
3.25413e-21	0.888813	0.286	0.088	1.64939e-16	Clip4
3.25715e-21	0.676756	0.314	0.103	1.65092e-16	Anapc1
3.66925e-21	5.09304	0.824	0.627	1.8598e-16	Ptprt
3.96957e-21	0.433718	0.212	0.049	2.01201e-16	Cdkl3
3.97365e-21	1.02988	0.475	0.214	2.01408e-16	Ngef
3.98908e-21	0.692035	0.263	0.076	2.0219e-16	Cmss1
4.04435e-21	0.781582	0.349	0.124	2.04992e-16	Rab30
4.16186e-21	0.846154	0.306	0.1	2.10948e-16	Zcchc14
4.29961e-21	0.625373	0.208	0.048	2.1793e-16	Cacng2
4.38508e-21	0.909897	0.286	0.088	2.22262e-16	Sgsm2
4.41487e-21	0.696095	0.365	0.136	2.23772e-16	Ocrl
4.4395e-21	0.981164	0.486	0.226	2.2502e-16	Npepps
4.9576e-21	0.898309	0.333	0.116	2.51281e-16	Fam19a5
5.04642e-21	0.558609	0.271	0.079	2.55783e-16	Zc3h7a
5.10731e-21	0.838691	0.329	0.116	2.58869e-16	Syn1
5.34043e-21	0.473392	0.216	0.052	2.70685e-16	Grk5
5.35487e-21	0.638814	0.247	0.067	2.71417e-16	Lrig2
5.48645e-21	0.996877	0.369	0.141	2.78086e-16	Mapkap1
5.53329e-21	0.504388	0.212	0.05	2.8046e-16	Irak2
5.58159e-21	0.685998	0.357	0.129	2.82908e-16	Hdgfrp3
5.6135e-21	1.84603	0.545	0.286	2.84526e-16	Nfat5
5.64578e-21	0.550079	0.22	0.054	2.86162e-16	4921511C10Rik
5.73457e-21	1.2282	0.616	0.344	2.90662e-16	Cdh2
7.16307e-21	0.320865	0.133	0.019	3.63067e-16	Gm14091
7.178e-21	0.818577	0.447	0.194	3.63824e-16	Fnip1
7.59789e-21	0.590879	0.29	0.091	3.85107e-16	Arfgef3
7.75769e-21	0.815655	0.416	0.176	3.93206e-16	Kmt2a
7.81309e-21	0.866507	0.349	0.126	3.96014e-16	Stk38
7.92701e-21	0.449982	0.18	0.037	4.01788e-16	Bcs1l
8.10368e-21	0.652851	0.388	0.152	4.10743e-16	Odf2
8.54408e-21	0.787377	0.322	0.109	4.33065e-16	Hspa4
8.6409e-21	0.612553	0.318	0.107	4.37973e-16	Armc9
8.64817e-21	0.4822	0.271	0.079	4.38341e-16	E130308A19Rik
8.84931e-21	1.30762	0.325	0.112	4.48536e-16	Cdc42se2
9.14538e-21	0.751404	0.392	0.156	4.63543e-16	Golgb1
9.28803e-21	0.339202	0.145	0.023	4.70773e-16	Cabp1
9.79421e-21	0.664365	0.29	0.092	4.96429e-16	Pigk
9.8715e-21	0.389123	0.165	0.03	5.00347e-16	6030443J06Rik
9.92715e-21	0.614545	0.22	0.054	5.03168e-16	Senp8
1.01575e-20	0.675213	0.275	0.083	5.14842e-16	Mcmbp
1.03835e-20	0.795828	0.408	0.164	5.263e-16	Mapre2
1.05201e-20	0.554909	0.322	0.108	5.33222e-16	Zfp692
1.0733e-20	0.90872	0.314	0.107	5.44012e-16	Specc1l
1.17003e-20	0.87654	0.337	0.12	5.93044e-16	Mast2
1.17833e-20	1.00753	0.373	0.144	5.97247e-16	Fndc3a
1.20999e-20	0.52444	0.298	0.095	6.13295e-16	Cab39
1.25522e-20	0.951411	0.349	0.129	6.36222e-16	Txlng
1.26408e-20	0.487505	0.255	0.071	6.40713e-16	Lmbr1
1.28457e-20	0.598132	0.302	0.099	6.51095e-16	Fam222b
1.30976e-20	1.36519	0.404	0.174	6.63865e-16	Atrn
1.37327e-20	0.969183	0.361	0.139	6.96053e-16	Fam126b
1.39768e-20	1.29671	0.463	0.214	7.08426e-16	Nudcd3
1.4395e-20	4.46656	0.906	0.756	7.29626e-16	Fars2
1.44933e-20	0.519423	0.2	0.046	7.34608e-16	Lamc1
1.47435e-20	1.72834	0.557	0.281	7.47291e-16	Pid1
1.49667e-20	0.620899	0.255	0.073	7.58604e-16	Atp7a
1.53034e-20	0.553076	0.204	0.048	7.75669e-16	Atl1
1.54614e-20	2.46148	0.604	0.344	7.83675e-16	Camk2b
1.61496e-20	0.472653	0.196	0.044	8.18559e-16	Ccz1
1.63848e-20	1.18499	0.412	0.176	8.30481e-16	Med13
1.66229e-20	0.803945	0.345	0.125	8.42548e-16	Rapgef1
1.6907e-20	0.673326	0.314	0.106	8.56949e-16	Tsc1
1.69706e-20	0.649508	0.271	0.082	8.60173e-16	Dtd1
1.70237e-20	1.00571	0.329	0.119	8.62865e-16	Rasa1
1.71902e-20	0.402837	0.239	0.064	8.71304e-16	Abl1
1.76626e-20	0.418296	0.243	0.066	8.95247e-16	Zfp182
1.84514e-20	0.507891	0.231	0.06	9.35225e-16	Stard9
1.86263e-20	0.723859	0.243	0.066	9.4409e-16	Slc8a2
1.87849e-20	0.559165	0.184	0.039	9.52133e-16	Myo1d
1.97819e-20	0.756043	0.298	0.098	1.00267e-15	Fbxl20
1.99523e-20	0.708537	0.329	0.116	1.0113e-15	Vezt
2.01279e-20	0.368824	0.129	0.018	1.0202e-15	Celsr3
2.01468e-20	0.597334	0.251	0.071	1.02116e-15	Usp48
2.02407e-20	0.78058	0.169	0.033	1.02592e-15	Chrm3
2.02922e-20	0.808909	0.333	0.119	1.02853e-15	Ep400
2.02965e-20	0.949276	0.412	0.172	1.02875e-15	Wasf1
2.06673e-20	0.655904	0.231	0.061	1.04754e-15	Gabbr2
2.09004e-20	0.794931	0.231	0.061	1.05936e-15	Mob3b
2.3509e-20	0.700247	0.31	0.104	1.19158e-15	Naa15
2.50161e-20	0.525725	0.251	0.071	1.26797e-15	Smarca1
2.54457e-20	0.65741	0.329	0.116	1.28974e-15	Rps6kb1
2.57377e-20	0.801009	0.294	0.095	1.30454e-15	Rmnd5a
2.57871e-20	0.475992	0.239	0.065	1.30704e-15	Tank
2.58345e-20	0.653715	0.239	0.065	1.30945e-15	Frs2
2.70856e-20	0.502225	0.255	0.073	1.37286e-15	Wipf2
2.71967e-20	0.924886	0.424	0.18	1.37849e-15	Zfp207
2.93238e-20	1.08894	0.506	0.242	1.4863e-15	Cx3cl1
3.09919e-20	0.491149	0.271	0.081	1.57086e-15	Setdb1
3.12034e-20	4.52065	0.831	0.701	1.58158e-15	Nfia
3.14048e-20	0.658124	0.275	0.084	1.59178e-15	Angel2
3.30474e-20	0.380969	0.184	0.039	1.67504e-15	Kcna1
3.40945e-20	0.301942	0.114	0.014	1.72811e-15	Kntc1
3.41762e-20	0.81368	0.306	0.102	1.73225e-15	Kif2a
3.43093e-20	0.601179	0.196	0.045	1.739e-15	Slc30a6
3.52326e-20	0.508792	0.227	0.06	1.7858e-15	Mtx2
3.63373e-20	0.769219	0.278	0.087	1.84179e-15	Tbce
3.73679e-20	0.36307	0.204	0.048	1.89403e-15	Gnb4
3.7599e-20	2.47933	0.502	0.253	1.90574e-15	Dtx3
3.7781e-20	0.909595	0.349	0.129	1.91497e-15	Sobp
3.80143e-20	0.610341	0.255	0.074	1.92679e-15	Plekha1
3.81891e-20	0.526864	0.227	0.06	1.93565e-15	Prdm10
3.82803e-20	3.009	0.671	0.409	1.94027e-15	Sox6
4.12012e-20	0.371427	0.165	0.032	2.08832e-15	Coch
4.56521e-20	0.631403	0.239	0.066	2.31392e-15	Phtf1
4.56988e-20	0.776639	0.278	0.086	2.31629e-15	Usp15
4.79266e-20	0.646688	0.333	0.119	2.42921e-15	Elavl1
4.80065e-20	1.66986	0.475	0.223	2.43326e-15	Prrc2c
4.85332e-20	0.291577	0.137	0.021	2.45995e-15	Tarsl2
5.0106e-20	1.32436	0.373	0.147	2.53967e-15	Cdk13
5.04039e-20	0.9632	0.322	0.11	2.55477e-15	Sfi1
5.15187e-20	0.65721	0.388	0.156	2.61128e-15	Eri3
5.20217e-20	0.811037	0.404	0.172	2.63677e-15	Tra2b
5.6784e-20	0.898122	0.333	0.121	2.87815e-15	Cpne8
5.70002e-20	0.639066	0.275	0.085	2.88911e-15	Mtif2
5.73498e-20	0.853822	0.369	0.142	2.90683e-15	Hacd3
5.7794e-20	0.926793	0.376	0.152	2.92935e-15	Armc8
5.78309e-20	0.916917	0.369	0.142	2.93122e-15	Ppp2r5c
6.55025e-20	1.29414	0.439	0.2	3.32006e-15	Gad1
6.70826e-20	1.07895	0.369	0.147	3.40015e-15	Abcc5
6.71551e-20	0.673638	0.298	0.098	3.40382e-15	Rictor
6.78279e-20	0.593893	0.345	0.126	3.43792e-15	Amn1
6.81502e-20	0.538921	0.22	0.057	3.45426e-15	Unk
7.08451e-20	1.42339	0.396	0.164	3.59086e-15	Gm5607
7.11312e-20	0.641949	0.212	0.052	3.60536e-15	Nsun2
7.23745e-20	0.505745	0.239	0.066	3.66837e-15	Msh3
7.2929e-20	0.492027	0.141	0.023	3.69648e-15	Gm1604a
7.34254e-20	1.31142	0.38	0.153	3.72164e-15	Ubl3
7.35146e-20	0.659589	0.314	0.108	3.72616e-15	Rngtt
7.36595e-20	0.522737	0.322	0.111	3.7335e-15	Uty
7.40936e-20	0.834928	0.302	0.104	3.75551e-15	Rhobtb2
7.57838e-20	1.55978	0.376	0.154	3.84118e-15	Tlk1
7.60893e-20	0.61744	0.259	0.077	3.85666e-15	Chl1
7.61486e-20	0.565152	0.29	0.094	3.85967e-15	Cpt1c
7.72568e-20	0.342865	0.125	0.018	3.91584e-15	Nfatc2
7.91355e-20	1.41295	0.314	0.11	4.01106e-15	Pmepa1
7.92348e-20	0.664154	0.255	0.075	4.0161e-15	Jak2
7.95725e-20	0.459198	0.157	0.029	4.03321e-15	1600010M07Rik
8.15017e-20	0.379191	0.243	0.067	4.13099e-15	Acvr2a
8.21339e-20	0.620142	0.235	0.064	4.16304e-15	Chp1
8.22056e-20	0.579843	0.235	0.065	4.16667e-15	Cdc40
9.06306e-20	0.915259	0.361	0.139	4.5937e-15	Cpeb4
9.08126e-20	0.280908	0.125	0.018	4.60293e-15	Ank1
9.36177e-20	1.67365	0.388	0.159	4.74511e-15	Clock
9.41885e-20	0.88942	0.212	0.053	4.77404e-15	Dlc1
9.77674e-20	1.00951	0.345	0.13	4.95544e-15	Rgl1
9.79216e-20	0.627966	0.184	0.041	4.96325e-15	Ube4bos1
9.83703e-20	0.775686	0.188	0.042	4.986e-15	C77370
1.00928e-19	1.63118	0.439	0.198	5.11565e-15	Mib1
1.0373e-19	0.78546	0.318	0.111	5.25767e-15	Apbb2
1.03933e-19	0.442623	0.227	0.06	5.26793e-15	Ppwd1
1.03935e-19	0.755887	0.271	0.084	5.26804e-15	Lage3
1.04414e-19	0.614732	0.325	0.116	5.29232e-15	Cenpc1
1.04691e-19	0.794446	0.325	0.116	5.30639e-15	4930517O19Rik
1.06311e-19	0.433704	0.184	0.041	5.38849e-15	Slc7a6
1.10083e-19	0.376992	0.247	0.07	5.57966e-15	Lrrc1
1.1474e-19	0.769069	0.392	0.16	5.81572e-15	Nt5c2
1.18646e-19	0.416033	0.196	0.046	6.01371e-15	Pxk
1.20015e-19	0.431097	0.196	0.046	6.0831e-15	St18
1.2617e-19	0.528207	0.318	0.109	6.39506e-15	Vps41
1.3087e-19	0.71682	0.318	0.111	6.6333e-15	Pkd1
1.38241e-19	1.27999	0.408	0.177	7.0069e-15	Gnb5
1.42464e-19	0.525091	0.239	0.067	7.22092e-15	Patj
1.43623e-19	0.548672	0.259	0.077	7.27968e-15	Itgb1
1.4842e-19	0.414155	0.165	0.033	7.52281e-15	Cxadr
1.49739e-19	0.438276	0.227	0.061	7.58967e-15	Evi5l
1.63347e-19	1.20142	0.459	0.226	8.27942e-15	Ddx24
1.64258e-19	0.927665	0.373	0.148	8.32558e-15	Myo18a
1.69848e-19	1.04067	0.451	0.211	8.60891e-15	Hipk2
1.74368e-19	1.13109	0.439	0.198	8.838e-15	Tnrc18
1.75587e-19	0.712605	0.278	0.088	8.89981e-15	Stx8
1.851e-19	0.667857	0.255	0.075	9.382e-15	Tmem175
1.88066e-19	0.596922	0.282	0.091	9.53231e-15	Dmtf1
2.02963e-19	2.34201	0.431	0.197	1.02874e-14	Clpp
2.07621e-19	0.381126	0.149	0.027	1.05235e-14	Fndc9
2.08278e-19	0.772568	0.424	0.183	1.05568e-14	Rab10
2.08343e-19	0.632029	0.376	0.147	1.05601e-14	Purg
2.08948e-19	0.474987	0.192	0.045	1.05907e-14	Phka2
2.10184e-19	0.930365	0.424	0.185	1.06534e-14	Kdm5b
2.11767e-19	0.523996	0.196	0.046	1.07336e-14	Serpini1
2.14487e-19	0.89431	0.302	0.104	1.08715e-14	Zbtb38
2.18346e-19	0.608705	0.263	0.08	1.10671e-14	Sugp2
2.2132e-19	0.434194	0.173	0.036	1.12178e-14	Abcb9
2.21348e-19	1.21727	0.42	0.185	1.12192e-14	Pds5b
2.29203e-19	0.297454	0.129	0.02	1.16174e-14	Mki67
2.4146e-19	2.20878	0.49	0.236	1.22386e-14	Lpp
2.74541e-19	1.13525	0.427	0.19	1.39154e-14	Smarca2
2.91212e-19	0.577437	0.216	0.056	1.47604e-14	Prr14l
3.07379e-19	0.811393	0.31	0.11	1.55798e-14	Lpgat1
3.09707e-19	0.359018	0.173	0.036	1.56978e-14	Exosc10
3.23462e-19	0.363961	0.137	0.023	1.6395e-14	Glra2
3.42319e-19	0.51481	0.251	0.074	1.73508e-14	Rnf138
3.48774e-19	0.63589	0.22	0.058	1.7678e-14	Scfd2
3.52249e-19	0.848256	0.271	0.086	1.78541e-14	Tbc1d23
3.81448e-19	0.809568	0.282	0.093	1.93341e-14	Senp2
3.88679e-19	1.12731	0.455	0.207	1.97006e-14	Add1
4.09214e-19	0.601549	0.357	0.137	2.07414e-14	Inpp5f
4.09418e-19	0.587657	0.263	0.082	2.07518e-14	Slc25a27
4.13521e-19	0.527249	0.227	0.062	2.09597e-14	Traf3ip2
4.21486e-19	0.620862	0.286	0.095	2.13634e-14	Cers4
4.41444e-19	0.619544	0.188	0.043	2.2375e-14	Lrp12
4.43128e-19	0.689214	0.212	0.055	2.24604e-14	Gm20417
4.61198e-19	0.577812	0.322	0.116	2.33763e-14	Tnpo1
4.65387e-19	1.5926	0.349	0.136	2.35886e-14	Sox11
4.71724e-19	1.24788	0.38	0.16	2.39098e-14	Foxn3
4.77033e-19	0.263617	0.153	0.029	2.41789e-14	Zfp408
4.81953e-19	1.39298	0.384	0.16	2.44283e-14	5330434G04Rik
4.96481e-19	0.277381	0.161	0.032	2.51646e-14	Thumpd3
5.06282e-19	0.344564	0.129	0.02	2.56614e-14	Gm15563
5.08595e-19	0.929976	0.294	0.099	2.57787e-14	Ints6l
5.09411e-19	0.672808	0.247	0.073	2.582e-14	Mapk1ip1
5.15143e-19	0.530771	0.224	0.06	2.61106e-14	Gmeb1
5.23101e-19	0.930153	0.322	0.116	2.65139e-14	Tmem126a
5.33234e-19	0.533889	0.247	0.072	2.70275e-14	Kcnk10
5.36847e-19	0.684574	0.255	0.077	2.72107e-14	Inpp4a
5.41328e-19	0.610006	0.259	0.079	2.74378e-14	Paxbp1
5.415e-19	0.877275	0.337	0.126	2.74465e-14	Snx27
5.45178e-19	1.61974	0.51	0.266	2.76329e-14	Huwe1
5.46416e-19	0.674616	0.416	0.18	2.76956e-14	Adgrb1
5.61287e-19	0.58854	0.22	0.059	2.84494e-14	Slc9a1
5.62565e-19	0.820053	0.478	0.226	2.85141e-14	Cbx5
5.82085e-19	1.10471	0.341	0.132	2.95036e-14	Wapl
5.97969e-19	0.436786	0.239	0.068	3.03087e-14	Nvl
5.98598e-19	0.507631	0.2	0.049	3.03406e-14	Pgbd5
6.03001e-19	0.66449	0.294	0.099	3.05637e-14	Vps54
6.18926e-19	0.51702	0.145	0.026	3.13709e-14	Dlx1
6.34584e-19	0.757998	0.278	0.091	3.21645e-14	Kcmf1
6.44504e-19	0.414783	0.235	0.066	3.26673e-14	Slc44a2
6.45064e-19	0.546679	0.271	0.085	3.26957e-14	Ilf3
6.57165e-19	0.618235	0.286	0.095	3.33091e-14	Cisd2
6.63565e-19	0.382125	0.149	0.027	3.36335e-14	Airn
7.23002e-19	0.527963	0.263	0.081	3.66461e-14	Morf4l1
7.4187e-19	0.575015	0.2	0.049	3.76024e-14	Cpsf3
7.46006e-19	0.465436	0.251	0.075	3.7812e-14	Cd46
7.51195e-19	0.692181	0.302	0.105	3.80751e-14	Zc3h13
7.67421e-19	0.28876	0.149	0.027	3.88975e-14	Susd1
7.7652e-19	0.585462	0.227	0.064	3.93587e-14	Pcbp3
7.91499e-19	0.793348	0.404	0.173	4.01179e-14	Arnt2
8.44324e-19	0.825038	0.341	0.129	4.27954e-14	Casc4
8.5919e-19	0.849212	0.329	0.122	4.35489e-14	Arpc2
8.5956e-19	0.538216	0.204	0.052	4.35677e-14	Gtpbp2
8.70274e-19	4.46234	0.678	0.432	4.41107e-14	Nnat
8.77167e-19	0.710609	0.314	0.112	4.44601e-14	Swt1
8.95432e-19	0.525265	0.204	0.052	4.53859e-14	Galc
9.28694e-19	1.14266	0.345	0.137	4.70718e-14	Trim33
9.57471e-19	0.626134	0.294	0.101	4.85304e-14	Plaa
9.79628e-19	0.56746	0.243	0.071	4.96534e-14	Ccm2
9.95856e-19	1.29106	0.373	0.154	5.0476e-14	Zmynd8
1.04445e-18	0.540065	0.263	0.082	5.29389e-14	Iqcb1
1.05804e-18	0.444526	0.173	0.038	5.36279e-14	Rufy2
1.06298e-18	0.310211	0.118	0.017	5.38783e-14	C79798
1.08118e-18	1.39548	0.365	0.15	5.48004e-14	Ptpn12
1.08174e-18	0.685106	0.231	0.066	5.48291e-14	Spats2l
1.08639e-18	0.379176	0.173	0.038	5.50647e-14	Slc35a1
1.1106e-18	0.644179	0.298	0.103	5.62917e-14	Brd8
1.11477e-18	0.573861	0.259	0.08	5.65032e-14	D130040H23Rik
1.11886e-18	0.416128	0.169	0.036	5.67107e-14	Slc6a15
1.13959e-18	0.898107	0.329	0.123	5.77611e-14	Setx
1.1624e-18	0.523618	0.239	0.07	5.89175e-14	Dnajc19
1.19096e-18	0.447914	0.224	0.061	6.03648e-14	Etv5
1.20039e-18	0.374	0.216	0.057	6.08429e-14	Heg1
1.20643e-18	0.490998	0.275	0.088	6.1149e-14	Tmod3
1.21208e-18	0.794956	0.345	0.132	6.14355e-14	Kcnq2
1.2341e-18	0.509166	0.243	0.072	6.25515e-14	Clint1
1.26761e-18	-8.99856	0.149	0.028	6.42502e-14	Lockd
1.30913e-18	0.84027	0.29	0.099	6.63545e-14	C2cd3
1.3126e-18	0.260384	0.118	0.017	6.65306e-14	Tmem229b
1.31782e-18	0.492005	0.259	0.08	6.6795e-14	Smap1
1.40175e-18	0.424255	0.204	0.052	7.1049e-14	Lima1
1.41555e-18	0.460385	0.216	0.058	7.17486e-14	Zkscan1
1.48138e-18	1.46946	0.341	0.131	7.50854e-14	Sec63
1.4891e-18	0.582252	0.282	0.094	7.54768e-14	Map2k5
1.49452e-18	0.845638	0.38	0.162	7.57511e-14	Ap3b1
1.51538e-18	1.62166	0.745	0.504	7.68083e-14	Luzp2
1.52023e-18	0.422266	0.216	0.058	7.70542e-14	Zfp346
1.53058e-18	0.570696	0.247	0.074	7.75792e-14	Dopey2
[truncated: 2,598 more rows]

## Sheet: Conserved_Genes
Gene	Dorsal_Ventral
Pde10a	Dorsal
Dcc	Dorsal
Nrxn3	Dorsal
Kcnip4	Dorsal
Nrg1	Dorsal
Nkain2	Dorsal
Gm29260	Dorsal
Nol4	Dorsal
Sgip1	Dorsal
Cacna2d1	Dorsal
Adam23	Dorsal
Pak3	Dorsal
Ntrk2	Dorsal
Flrt2	Dorsal
Trim2	Dorsal
Epha4	Dorsal
Dclk1	Dorsal
Epha5	Dorsal
Gpc5	Dorsal
Pcdh15	Dorsal
Ccnd2	Dorsal
Braf	Dorsal
Tox3	Dorsal
Rgs6	Dorsal
Mapt	Dorsal
Pax6	Dorsal
Arih1	Dorsal
Btbd9	Dorsal
Fgfr2	Dorsal
Pls1	Dorsal
Mpp7	Dorsal
St7	Dorsal
Ankrd6	Dorsal
Pmepa1	Dorsal
Kcnk10	Dorsal
Garnl3	Dorsal
Ssbp3	Dorsal
Zdbf2	Dorsal
Chic2	Dorsal
Clu	Dorsal
Arx	Dorsal
Ccnl1	Dorsal
Rorb	Dorsal
Jmy	Dorsal
Lama2	Dorsal
Pla2g7	Dorsal
Tubb5	Dorsal
Lrp4	Dorsal
Hps4	Dorsal
Dad1	Dorsal
Dcun1d4	Dorsal
Usp2	Dorsal
Ednrb	Dorsal
Ppp1r1a	Dorsal
Cdk11b	Dorsal
Rgs2	Dorsal
Slc25a3	Dorsal
6330403K07Rik	Dorsal
Htra1	Dorsal
Ptprn2	Ventral
Prss56	Ventral
Slit2	Ventral
Adamts18	Ventral
Slc1a3	Ventral
Gm10561	Ventral
Dpyd	Ventral
